# Supplementary material for: Large-Scale Protein Analysis of Experimental Retinal Artery Occlusion
Source: MDPI journal article supplement (doi:10.3390/ijms24097919), 2023-04-27
Supplement: s1 [file s1]

| Selected upregulated pathways |                    |                                                                                                                                                                                                                                                                                                                                                                                                                                                                                                                                                                                                                                                                                                                                                                                                                                                                                                                                                                                                                                                                                                                                                                                                                                                                                                                                                                                                                                                                                                                                                                                                                                                                                                                                                                                                                                                                                                                                                                                                                                                                                                                                                                                                                                                                                                                                          |
|-------------------------------|--------------------|------------------------------------------------------------------------------------------------------------------------------------------------------------------------------------------------------------------------------------------------------------------------------------------------------------------------------------------------------------------------------------------------------------------------------------------------------------------------------------------------------------------------------------------------------------------------------------------------------------------------------------------------------------------------------------------------------------------------------------------------------------------------------------------------------------------------------------------------------------------------------------------------------------------------------------------------------------------------------------------------------------------------------------------------------------------------------------------------------------------------------------------------------------------------------------------------------------------------------------------------------------------------------------------------------------------------------------------------------------------------------------------------------------------------------------------------------------------------------------------------------------------------------------------------------------------------------------------------------------------------------------------------------------------------------------------------------------------------------------------------------------------------------------------------------------------------------------------------------------------------------------------------------------------------------------------------------------------------------------------------------------------------------------------------------------------------------------------------------------------------------------------------------------------------------------------------------------------------------------------------------------------------------------------------------------------------------------------|
| Pathway name                  | Number of proteins | Submitted entities found                                                                                                                                                                                                                                                                                                                                                                                                                                                                                                                                                                                                                                                                                                                                                                                                                                                                                                                                                                                                                                                                                                                                                                                                                                                                                                                                                                                                                                                                                                                                                                                                                                                                                                                                                                                                                                                                                                                                                                                                                                                                                                                                                                                                                                                                                                                 |
| Cellular response to stress   | 49                 | <p>           Cytoplasmic dynein 1 heavy chain 1<br/>           Flavin reductase<br/>           Thioredoxin<br/>           26S proteasome non-ATPase regulatory subunit 7<br/>           26S proteasome regulatory subunit 8<br/>           Apolipoprotein A-I<br/>           Catalase<br/>           40S ribosomal protein S10<br/>           MAP kinase-activated protein kinase 2<br/>           Hemoglobin subunit alpha<br/>           40S ribosomal protein S6<br/>           Protein disulfide-isomerase<br/>           Signal transducer and activator of transcription 3<br/>           60S ribosomal protein L18<br/>           26S proteasome non-ATPase regulatory subunit 11<br/>           60S ribosomal protein L4<br/>           Cytoplasmic dynein 1 intermediate chain 2<br/>           Glucose-6-phosphate 1-dehydrogenase<br/>           Glutamine--fructose-6-phosphate aminotransferase [isomerizing] 1<br/>           Tubulin beta-6 chain<br/>           Endoplasmic reticulum chaperone BiP<br/>           Elongation factor 1-alpha 1<br/>           40S ribosomal protein S8<br/>           Eukaryotic translation initiation factor 2 subunit 2<br/>           40S ribosomal protein S24<br/>           Proteasome subunit alpha type-6<br/>           Alpha-crystallin B chain<br/>           Glutathione peroxidase 1<br/>           40S ribosomal protein S12<br/>           Proteasome subunit alpha type-5<br/>           Proteasome activator complex subunit 1<br/>           60S ribosomal protein L35<br/>           26S proteasome regulatory subunit 10B<br/>           60S ribosomal protein L14<br/>           Protein disulfide-isomerase A6<br/>           Hemoglobin subunit beta<br/>           Proteasome subunit alpha type-4<br/>           Eukaryotic translation initiation factor 2 subunit 1<br/>           Glutamate--cysteine ligase catalytic subunit<br/>           Talin-1<br/>           Proteasome activator complex subunit 2<br/>           60S ribosomal protein L23<br/>           60S ribosomal protein L10a<br/>           Endoplasmic<br/>           Peroxiredoxin-1<br/>           Histone-binding protein RBBP4<br/>           F-actin-capping protein subunit alpha-1<br/>           Transcription factor p65<br/>           40S ribosomal protein S14         </p> |

|                                                                                                         |    |                                                                                                                                                                                                                                                                                                                                                                                                                                                                                                                                                                                                                                                                                                                                                                                                                                                                                                                                                                                |
|---------------------------------------------------------------------------------------------------------|----|--------------------------------------------------------------------------------------------------------------------------------------------------------------------------------------------------------------------------------------------------------------------------------------------------------------------------------------------------------------------------------------------------------------------------------------------------------------------------------------------------------------------------------------------------------------------------------------------------------------------------------------------------------------------------------------------------------------------------------------------------------------------------------------------------------------------------------------------------------------------------------------------------------------------------------------------------------------------------------|
| Cellular response to hypoxia + Oxygen-dependent proline hydroxylation of Hypoxia-inducible Factor Alpha | 9  | <p>           Proteasome activator complex subunit 2<br/>           26S proteasome regulatory subunit 10B<br/>           Proteasome subunit alpha type-5<br/>           26S proteasome regulatory subunit 8<br/>           Proteasome subunit alpha type-4<br/>           26S proteasome non-ATPase regulatory subunit 11<br/>           Proteasome activator complex subunit 1<br/>           Proteasome subunit alpha type-6<br/>           26S proteasome non-ATPase regulatory subunit 7         </p>                                                                                                                                                                                                                                                                                                                                                                                                                                                                      |
| Cellular response to chemical stress                                                                    | 20 | <p>           Proteasome activator complex subunit 2<br/>           Proteasome subunit alpha type-5<br/>           Peroxiredoxin-1<br/>           26S proteasome non-ATPase regulatory subunit 11<br/>           Thioredoxin<br/>           Flavin reductase<br/>           Proteasome activator complex subunit 1<br/>           Glucose-6-phosphate 1-dehydrogenase<br/>           26S proteasome non-ATPase regulatory subunit 7<br/>           26S proteasome regulatory subunit 10B<br/>           26S proteasome regulatory subunit 8<br/>           Hemoglobin subunit beta<br/>           Proteasome subunit alpha type-4<br/>           Catalase<br/>           Proteasome subunit alpha type-6<br/>           Hemoglobin subunit alpha<br/>           Glutamate--cysteine ligase catalytic subunit<br/>           Protein disulfide-isomerase<br/>           Glutathione peroxidase 1<br/>           Signal transducer and activator of transcription 3         </p> |
| KEAP1-NFE2L2 pathway                                                                                    | 12 | <p>           Proteasome activator complex subunit 2<br/>           26S proteasome regulatory subunit 10B<br/>           Proteasome subunit alpha type-5<br/>           26S proteasome regulatory subunit 8<br/>           Proteasome subunit alpha type-4<br/>           Peroxiredoxin-1<br/>           26S proteasome non-ATPase regulatory subunit 11<br/>           Proteasome activator complex subunit 1<br/>           Glucose-6-phosphate 1-dehydrogenase<br/>           Proteasome subunit alpha type-6<br/>           26S proteasome non-ATPase regulatory subunit 7<br/>           Glutamate--cysteine ligase catalytic subunit         </p>                                                                                                                                                                                                                                                                                                                        |
| Detoxification of Reactive Oxygen Species                                                               | 5  | <p>           Peroxiredoxin-1<br/>           Catalase<br/>           Thioredoxin<br/>           Protein disulfide-isomerase<br/>           Glutathione peroxidase 1         </p>                                                                                                                                                                                                                                                                                                                                                                                                                                                                                                                                                                                                                                                                                                                                                                                               |
| Cellular response to starvation + Response of EIF2AK4 (GCN2) to amino acid deficiency                   | 14 | <p>           60S ribosomal protein L18<br/>           40S ribosomal protein S12<br/>           60S ribosomal protein L10a<br/>           60S ribosomal protein L23<br/>           60S ribosomal protein L4<br/>           60S ribosomal protein L35<br/>           60S ribosomal protein L14<br/>           40S ribosomal protein S8<br/>           40S ribosomal protein S14         </p>                                                                                                                                                                                                                                                                                                                                                                                                                                                                                                                                                                                    |

|                                 |     |                                                                                                                                                                                                                                                                                                                                                                                                                                                                                                                                                                                                                                                                                                                                                                                                                                                                                                                                                                                                                                                                                                                                                                                                                                                                                                                                                                                                                                                                                                                                                                           |
|---------------------------------|-----|---------------------------------------------------------------------------------------------------------------------------------------------------------------------------------------------------------------------------------------------------------------------------------------------------------------------------------------------------------------------------------------------------------------------------------------------------------------------------------------------------------------------------------------------------------------------------------------------------------------------------------------------------------------------------------------------------------------------------------------------------------------------------------------------------------------------------------------------------------------------------------------------------------------------------------------------------------------------------------------------------------------------------------------------------------------------------------------------------------------------------------------------------------------------------------------------------------------------------------------------------------------------------------------------------------------------------------------------------------------------------------------------------------------------------------------------------------------------------------------------------------------------------------------------------------------------------|
|                                 |     | 40S ribosomal protein S10<br>Eukaryotic translation initiation factor 2 subunit 2<br>40S ribosomal protein S24<br>Eukaryotic translation initiation factor 2 subunit 1<br>40S ribosomal protein S6                                                                                                                                                                                                                                                                                                                                                                                                                                                                                                                                                                                                                                                                                                                                                                                                                                                                                                                                                                                                                                                                                                                                                                                                                                                                                                                                                                        |
| Unfolded Protein Response (UPR) | 7   | Endoplasmic reticulum chaperone BiP<br>Protein disulfide-isomerase A6<br>Endoplasmic reticulum chaperone BiP<br>Eukaryotic translation initiation factor 2 subunit 2<br>Eukaryotic translation initiation factor 2 subunit 1<br>Glutamine--fructose-6-phosphate aminotransferase [isomerizing] 1<br>Talin-1                                                                                                                                                                                                                                                                                                                                                                                                                                                                                                                                                                                                                                                                                                                                                                                                                                                                                                                                                                                                                                                                                                                                                                                                                                                               |
| Immune System                   | 82* | Signal transducer and activator of transcription 2<br>Ubiquitin carboxyl-terminal hydrolase 14<br>Cytoplasmic dynein 1 heavy chain 1<br>Major vault protein<br>Probable E3 ubiquitin-protein ligase HERC4<br>Glycogen phosphorylase, liver form<br>HLA class I histocompatibility antigen, A alpha chain<br>Double-stranded RNA-specific adenosine deaminase<br>Solute carrier family 2, facilitated glucose transporter member 3<br>Thioredoxin<br>26S proteasome non-ATPase regulatory subunit 7<br>Myosin-9<br>Signal transducer and activator of transcription 1-alpha/beta<br>26S proteasome regulatory subunit 8<br>Annexin A1<br>Catalase<br>Actin-related protein 2/3 complex subunit 5<br>Interferon-induced GTP-binding protein Mx2<br>Ras GTPase-activating-like protein IQGAP1<br>Alpha-2-HS-glycoprotein<br>MAP kinase-activated protein kinase 2<br>Cyclin-dependent kinase 11B<br>Annexin A2<br>Protein disulfide-isomerase<br>Signal transducer and activator of transcription 3<br>Stomatin<br>Vitronectin<br>Elongation factor 2<br>26S proteasome non-ATPase regulatory subunit 11<br>Cytoplasmic dynein 1 intermediate chain 2<br>Plastin-2<br>Vinculin<br>Rho-related GTP-binding protein RhoG<br>Tubulin beta-6 chain<br>Endoplasmic reticulum chaperone BiP<br>Synaptosomal-associated protein 23<br>Elongation factor 1-alpha 1<br>Fibrinogen gamma chain<br>U2 small nuclear ribonucleoprotein A'<br>Early endosome antigen 1<br>Actin-related protein 3<br>Gelsolin<br>Proteasome subunit alpha type-6<br>Serine/threonine-protein kinase PAK 2 |

|                      |    |                                                                                                                                                                                                                                                                                                                                                                                                                                                                                                                                                                                                                                                                                                                                                                                                                                                                                                                                                                                                                                                                                                              |
|----------------------|----|--------------------------------------------------------------------------------------------------------------------------------------------------------------------------------------------------------------------------------------------------------------------------------------------------------------------------------------------------------------------------------------------------------------------------------------------------------------------------------------------------------------------------------------------------------------------------------------------------------------------------------------------------------------------------------------------------------------------------------------------------------------------------------------------------------------------------------------------------------------------------------------------------------------------------------------------------------------------------------------------------------------------------------------------------------------------------------------------------------------|
|                      |    | Fibrinogen beta chain [Cleaved into: Fibrinopeptide B<br>Fibronectin<br>Glycogenin-1<br>Filamin-A<br>Ferritin heavy chain<br>Rab GDP dissociation inhibitor beta<br>Ferritin light chain<br>Ras GTPase-activating-like protein IQGAP2<br>Proteasome subunit alpha type-5<br>Actin-related protein 2/3 complex subunit 1B<br>Filamin-B<br>Proteasome activator complex subunit 1<br>Protein disulfide-isomerase A3<br>Leukocyte elastase inhibitor<br>26S proteasome regulatory subunit 10B<br>3-ketoacyl-CoA thiolase, peroxisomal<br>Cofilin-1<br>Hemoglobin subunit beta<br>Copine-1<br>Proteasome subunit alpha type-4<br>Moesin<br>Poly<br>Proteasome activator complex subunit 2<br>Cathepsin D<br>Interferon-induced GTP-binding protein Mx1<br>Endoplasmic reticulum chaperone BiP<br>Catenin beta-1<br>Cytoplasmic FMR1-interacting protein 1<br>Galectin-3<br>Carbonic anhydrase 1<br>F-actin-capping protein subunit alpha-1<br>Vimentin<br>Transcription factor p65<br>Alpha-1-antitrypsin<br>Calpain-1 catalytic subunit<br>Beta-glucuronidase<br>Eukaryotic initiation factor 4A-I<br>Clusterin |
| Innate Immune System | 58 | Ubiquitin carboxyl-terminal hydrolase 14<br>Cytoplasmic dynein 1 heavy chain 1<br>Major vault protein<br>Glycogen phosphorylase, liver form<br>Solute carrier family 2, facilitated glucose transporter member 3<br>Thioredoxin<br>26S proteasome non-ATPase regulatory subunit 7<br>Myosin-9<br>26S proteasome regulatory subunit 8<br>Catalase<br>Actin-related protein 2/3 complex subunit 5<br>Ras GTPase-activating-like protein IQGAP1<br>Alpha-2-HS-glycoprotein<br>MAP kinase-activated protein kinase 2<br>Annexin A2<br>Stomatin<br>Vitronectin<br>Elongation factor 2<br>26S proteasome non-ATPase regulatory subunit 11                                                                                                                                                                                                                                                                                                                                                                                                                                                                          |

|                          |    |                                                                                                                                                                                                                                                                                                                                                                                                                                                                                                                                                                                                                                                                                                                                                                                                                                                                                                                                                                                                                                                                                                                                                                                                                                                              |
|--------------------------|----|--------------------------------------------------------------------------------------------------------------------------------------------------------------------------------------------------------------------------------------------------------------------------------------------------------------------------------------------------------------------------------------------------------------------------------------------------------------------------------------------------------------------------------------------------------------------------------------------------------------------------------------------------------------------------------------------------------------------------------------------------------------------------------------------------------------------------------------------------------------------------------------------------------------------------------------------------------------------------------------------------------------------------------------------------------------------------------------------------------------------------------------------------------------------------------------------------------------------------------------------------------------|
|                          |    | <p>Vinculin<br/> Rho-related GTP-binding protein RhoG<br/> Synaptosomal-associated protein 23<br/> Elongation factor 1-alpha 1<br/> Fibrinogen gamma chain<br/> Early endosome antigen 1<br/> Actin-related protein 3<br/> Gelsolin<br/> Proteasome subunit alpha type-6<br/> Serine/threonine-protein kinase PAK 2<br/> Fibrinogen beta chain [Cleaved into: Fibrinopeptide B<br/> Glycogenin-1<br/> Ferritin heavy chain<br/> Rab GDP dissociation inhibitor beta<br/> Ferritin light chain<br/> Ras GTPase-activating-like protein IQGAP2<br/> Proteasome subunit alpha type-5<br/> Actin-related protein 2/3 complex subunit 1B<br/> Proteasome activator complex subunit 1<br/> Leukocyte elastase inhibitor<br/> 26S proteasome regulatory subunit 10B<br/> 3-ketoacyl-CoA thiolase, peroxisomal<br/> Cofilin-1<br/> Hemoglobin subunit beta<br/> Copine-1<br/> Proteasome subunit alpha type-4<br/> Poly<br/> Proteasome activator complex subunit 2<br/> Cathepsin D<br/> Endoplamin<br/> Catenin beta-1<br/> Cytoplasmic FMR1-interacting protein 1<br/> Galectin-3<br/> F-actin-capping protein subunit alpha-1<br/> Transcription factor p65<br/> Alpha-1-antitrypsin<br/> Calpain-1 catalytic subunit<br/> Beta-glucuronidase<br/> Clusterin</p> |
| Neutrophil degranulation | 34 | <p>Cytoplasmic dynein 1 heavy chain 1<br/> Rab GDP dissociation inhibitor beta<br/> Ferritin light chain<br/> Major vault protein<br/> Ras GTPase-activating-like protein IQGAP2<br/> Glycogen phosphorylase, liver form<br/> Proteasome subunit alpha type-5<br/> Solute carrier family 2, facilitated glucose transporter member 3<br/> 26S proteasome non-ATPase regulatory subunit 7<br/> Leukocyte elastase inhibitor (LEI)<br/> 3-ketoacyl-CoA thiolase, peroxisomal<br/> Hemoglobin subunit beta<br/> Actin-related protein 2/3 complex subunit 5<br/> Catalase<br/> Copine-1<br/> Ras GTPase-activating-like protein IQGAP1<br/> Alpha-2-HS-glycoprotein<br/> Annexin A2</p>                                                                                                                                                                                                                                                                                                                                                                                                                                                                                                                                                                         |

|                                     |      |                                                                                                                                                                                                                                                                                                                                                                                                                                                                                                                                                                                                                                                                                                                                                                                                                                                                                                                                                                                                                                                                                                                                                                                                                                                                                                                              |
|-------------------------------------|------|------------------------------------------------------------------------------------------------------------------------------------------------------------------------------------------------------------------------------------------------------------------------------------------------------------------------------------------------------------------------------------------------------------------------------------------------------------------------------------------------------------------------------------------------------------------------------------------------------------------------------------------------------------------------------------------------------------------------------------------------------------------------------------------------------------------------------------------------------------------------------------------------------------------------------------------------------------------------------------------------------------------------------------------------------------------------------------------------------------------------------------------------------------------------------------------------------------------------------------------------------------------------------------------------------------------------------|
|                                     |      | <p>Stomatin<br/> Cathepsin D<br/> Elongation factor 2<br/> 26S proteasome non-ATPase regulatory subunit 11<br/> Cytoplasmic FMR1-interacting protein 1<br/> Rho-related GTP-binding protein RhoG<br/> Galectin-3<br/> Vinculin<br/> Synaptosomal-associated protein 23<br/> Elongation factor 1-alpha 1<br/> Alpha-1-antitrypsin<br/> Calpain-1 catalytic subunit<br/> Gelsolin<br/> Beta-glucuronidase<br/> Ferritin heavy chain<br/> Glycogenin-1</p>                                                                                                                                                                                                                                                                                                                                                                                                                                                                                                                                                                                                                                                                                                                                                                                                                                                                      |
| Cytokine Signaling in Immune system | 35*  | <p>Ubiquitin carboxyl-terminal hydrolase 14<br/> Signal transducer and activator of transcription 2<br/> Proteasome subunit alpha type-5<br/> Double-stranded RNA-specific adenosine deaminase<br/> HLA class I histocompatibility antigen, A alpha chain<br/> Filamin-B<br/> Proteasome activator complex subunit 1<br/> 26S proteasome non-ATPase regulatory subunit 7<br/> Signal transducer and activator of transcription 1-alpha/beta<br/> 26S proteasome regulatory subunit 10B<br/> 26S proteasome regulatory subunit 8<br/> Cofilin-1<br/> Annexin A1<br/> Proteasome subunit alpha type-4<br/> Interferon-induced GTP-binding protein Mx2<br/> MAP kinase-activated protein kinase 2<br/> Moesin<br/> Annexin A2<br/> Protein disulfide-isomerase<br/> Signal transducer and activator of transcription 3<br/> Proteasome activator complex subunit 2<br/> Interferon-induced GTP-binding protein Mx1<br/> Endoplamin<br/> 26S proteasome non-ATPase regulatory subunit 11<br/> Plastin-2<br/> Carbonic anhydrase 1<br/> F-actin-capping protein subunit alpha-1<br/> Vimentin<br/> Transcription factor p65<br/> U2 small nuclear ribonucleoprotein A'<br/> Serine/threonine-protein kinase PAK 2<br/> Proteasome subunit alpha type-6<br/> Fibronectin<br/> Eukaryotic initiation factor 4A-I<br/> Filamin-A</p> |
| Signaling by Interleukins           | 29** | <p>Ubiquitin carboxyl-terminal hydrolase 14<br/> Signal transducer and activator of transcription 2<br/> Proteasome subunit alpha type-5<br/> Proteasome activator complex subunit 1<br/> 26S proteasome non-ATPase regulatory subunit 7<br/> Signal transducer and activator of transcription 1-alpha/beta</p>                                                                                                                                                                                                                                                                                                                                                                                                                                                                                                                                                                                                                                                                                                                                                                                                                                                                                                                                                                                                              |

|                                 |     |                                                                                                                                                                                                                                                                                                                                                                                                                                                                                                                                                                                                                                                                                                  |
|---------------------------------|-----|--------------------------------------------------------------------------------------------------------------------------------------------------------------------------------------------------------------------------------------------------------------------------------------------------------------------------------------------------------------------------------------------------------------------------------------------------------------------------------------------------------------------------------------------------------------------------------------------------------------------------------------------------------------------------------------------------|
|                                 |     | 26S proteasome regulatory subunit 10B<br>26S proteasome regulatory subunit 8<br>Cofilin-1<br>Annexin A1<br>Proteasome subunit alpha type-4<br>MAP kinase-activated protein kinase 2<br>Moesin<br>Annexin A2<br>Protein disulfide-isomerase<br>Signal transducer and activator of transcription 3<br>Proteasome activator complex subunit 2<br>Endoplasmic reticulum chaperone BiP<br>26S proteasome non-ATPase regulatory subunit 11<br>Plastin-2<br>Carbonic anhydrase 1<br>F-actin-capping protein subunit alpha-1<br>Vimentin<br>Transcription factor p65<br>U2 small nuclear ribonucleoprotein A'<br>Serine/threonine-protein kinase PAK 2<br>Proteasome subunit alpha type-6<br>Fibronectin |
| Interleukin-1 family signaling  | 12  | Ubiquitin carboxyl-terminal hydrolase 14<br>Proteasome activator complex subunit 2<br>26S proteasome regulatory subunit 10B<br>Proteasome subunit alpha type-5<br>26S proteasome regulatory subunit 8<br>Transcription factor p65<br>Proteasome subunit alpha type-4<br>26S proteasome non-ATPase regulatory subunit 11<br>Proteasome activator complex subunit 1<br>Proteasome subunit alpha type-6<br>26S proteasome non-ATPase regulatory subunit 7<br>Signal transducer and activator of transcription 3                                                                                                                                                                                     |
| Interleukin-1 signaling         | 11  | Ubiquitin carboxyl-terminal hydrolase 14<br>Proteasome activator complex subunit 2<br>26S proteasome regulatory subunit 10B<br>Proteasome subunit alpha type-5<br>26S proteasome regulatory subunit 8<br>Transcription factor p65<br>Proteasome subunit alpha type-4<br>26S proteasome non-ATPase regulatory subunit 11<br>Proteasome activator complex subunit 1<br>Proteasome subunit alpha type-6<br>26S proteasome non-ATPase regulatory subunit 7                                                                                                                                                                                                                                           |
| Interleukin-12 family signaling | 12* | Signal transducer and activator of transcription 1-alpha/beta<br>Proteasome activator complex subunit 2<br>Carbonic anhydrase 1<br>F-actin-capping protein subunit alpha-1<br>Cofilin-1<br>U2 small nuclear ribonucleoprotein A'<br>Serine/threonine-protein kinase PAK 2<br>Moesin<br>Plastin-2<br>Annexin A2<br>Protein disulfide-isomerase<br>Signal transducer and activator of transcription 3                                                                                                                                                                                                                                                                                              |

|                                                |    |                                                                                                                                                                                                                                                                                                                                                                                                                                                                                                                                                                                                                                                                                                                                             |
|------------------------------------------------|----|---------------------------------------------------------------------------------------------------------------------------------------------------------------------------------------------------------------------------------------------------------------------------------------------------------------------------------------------------------------------------------------------------------------------------------------------------------------------------------------------------------------------------------------------------------------------------------------------------------------------------------------------------------------------------------------------------------------------------------------------|
| Interleukin-12 signaling                       | 10 | Proteasome activator complex subunit 2<br>Carbonic anhydrase 1<br>F-actin-capping protein subunit alpha-1<br>Cofilin-1<br>U2 small nuclear ribonucleoprotein A'<br>Serine/threonine-protein kinase PAK 2<br>Plastin-2<br>Moesin<br>Annexin A2<br>Protein disulfide-isomerase                                                                                                                                                                                                                                                                                                                                                                                                                                                                |
| Hemostasis                                     | 29 | Annexin A5<br>Calumenin<br>Guanine nucleotide-binding protein G<br>Melanoma-associated antigen D2<br>Plasminogen<br>Hemoglobin subunit beta<br>Cofilin-1<br>CYFIP-related Rac1 interactor B<br>Apolipoprotein A-I<br>Alpha-2-HS-glycoprotein<br>Serotransferrin<br>Annexin A2<br>Talin-1<br>Transgelin-2<br>Rho-related GTP-binding protein RhoG<br>Vinculin<br>Tubulin beta-6 chain<br>Endoplasmic reticulum chaperone BiP<br>Alpha-actinin-4<br>Kinesin-like protein KIF1B<br>F-actin-capping protein subunit alpha-1<br>Alpha-1-antitrypsin<br>Fibrinogen gamma chain<br>SPARC<br>Guanine nucleotide-binding protein subunit alpha-13<br>Fibrinogen beta chain [Cleaved into: Fibrinopeptide B]<br>Fibronectin<br>Clusterin<br>Filamin-A |
| Platelet activation, signaling and aggregation | 24 | Annexin A5<br>Calumenin<br>Guanine nucleotide-binding protein G<br>Transgelin-2<br>Melanoma-associated antigen D2<br>Rho-related GTP-binding protein RhoG<br>Vinculin<br>Endoplasmic reticulum chaperone BiP<br>Alpha-actinin-4<br>Plasminogen<br>Cofilin-1<br>CYFIP-related Rac1 interactor B<br>Alpha-1-antitrypsin<br>Apolipoprotein A-I<br>Fibrinogen gamma chain<br>Alpha-2-HS-glycoprotein<br>Serotransferrin<br>SPARC                                                                                                                                                                                                                                                                                                                |

|                                                                       |    |                                                                                                                                                                                                                                                                                                                                                                                                                                                                                                                                                                                                                                                                                                                                                                                                                       |
|-----------------------------------------------------------------------|----|-----------------------------------------------------------------------------------------------------------------------------------------------------------------------------------------------------------------------------------------------------------------------------------------------------------------------------------------------------------------------------------------------------------------------------------------------------------------------------------------------------------------------------------------------------------------------------------------------------------------------------------------------------------------------------------------------------------------------------------------------------------------------------------------------------------------------|
|                                                                       |    | Guanine nucleotide-binding protein subunit alpha-13<br>Fibrinogen beta chain [Cleaved into: Fibrinopeptide B<br>Fibronectin<br>Clusterin<br>Talin-1<br>Filamin-A                                                                                                                                                                                                                                                                                                                                                                                                                                                                                                                                                                                                                                                      |
| Platelet Aggregation (Plug Formation)                                 | 4  | Fibrinogen gamma chain<br>Fibrinogen beta chain<br>Fibronectin<br>Talin-1                                                                                                                                                                                                                                                                                                                                                                                                                                                                                                                                                                                                                                                                                                                                             |
| Response to elevated platelet cytosolic Ca2+ + Platelet degranulation | 21 | Annexin A5<br>Calumenin<br>Transgelin-2<br>Melanoma-associated antigen D2<br>Vinculin<br>Endoplasmic reticulum chaperone BiP<br>Alpha-actinin-4<br>Plasminogen<br>Cofilin-1<br>CYFIP-related Rac1 interactor B<br>Alpha-1-antitrypsin<br>Apolipoprotein A-I<br>Fibrinogen gamma chain<br>Serotransferrin<br>Alpha-2-HS-glycoprotein<br>SPARC<br>Fibrinogen beta chain [Cleaved into: Fibrinopeptide B<br>Fibronectin<br>Clusterin<br>Talin-1<br>Filamin-A                                                                                                                                                                                                                                                                                                                                                             |
| Nervous system development + Axon guidance                            | 37 | 40S ribosomal protein S12<br>Proteasome subunit alpha type-5<br>Actin-related protein 2/3 complex subunit 1B<br>Polyadenylate-binding protein 1<br>Proteasome activator complex subunit 1<br>26S proteasome non-ATPase regulatory subunit 7<br>Myosin-9<br>Ezrin<br>Eukaryotic peptide chain release factor subunit 1<br>60S ribosomal protein L35<br>26S proteasome regulatory subunit 10B<br>60S ribosomal protein L14<br>26S proteasome regulatory subunit 8<br>Radixin<br>Cofilin-1<br>Actin-related protein 2/3 complex subunit 5<br>Proteasome subunit alpha type-4<br>40S ribosomal protein S10<br>Moesin<br>40S ribosomal protein S6<br>Talin-1<br>60S ribosomal protein L18<br>Proteasome activator complex subunit 2<br>60S ribosomal protein L10a<br>60S ribosomal protein L23<br>60S ribosomal protein L4 |

|                                             |    |                                                                                                                                                                                                                                                                                                                                                                                                                                                                                                                                                                                                                                                                                                                                                                                                                                                                                                                  |
|---------------------------------------------|----|------------------------------------------------------------------------------------------------------------------------------------------------------------------------------------------------------------------------------------------------------------------------------------------------------------------------------------------------------------------------------------------------------------------------------------------------------------------------------------------------------------------------------------------------------------------------------------------------------------------------------------------------------------------------------------------------------------------------------------------------------------------------------------------------------------------------------------------------------------------------------------------------------------------|
|                                             |    | 26S proteasome non-ATPase regulatory subunit 11<br>Myosin regulatory light chain 12A<br>Tubulin beta-6 chain<br>40S ribosomal protein S14<br>40S ribosomal protein S8<br>Actin-related protein 3<br>40S ribosomal protein S24<br>Ran-binding protein 9<br>Serine/threonine-protein kinase PAK 2<br>Proteasome subunit alpha type-6<br>Regulator of nonsense transcripts 2                                                                                                                                                                                                                                                                                                                                                                                                                                                                                                                                        |
| Signaling by ROBO receptors                 | 25 | 40S ribosomal protein S12<br>Proteasome subunit alpha type-5<br>Polyadenylate-binding protein 1<br>Proteasome activator complex subunit 1<br>26S proteasome non-ATPase regulatory subunit 7<br>Eukaryotic peptide chain release factor subunit 1<br>60S ribosomal protein L35<br>26S proteasome regulatory subunit 10B<br>60S ribosomal protein L14<br>26S proteasome regulatory subunit 8<br>Proteasome subunit alpha type-4<br>40S ribosomal protein S10<br>40S ribosomal protein S6<br>60S ribosomal protein L18<br>Proteasome activator complex subunit 2<br>60S ribosomal protein L10a<br>60S ribosomal protein L23<br>60S ribosomal protein L4<br>26S proteasome non-ATPase regulatory subunit 11<br>40S ribosomal protein S14<br>40S ribosomal protein S8<br>40S ribosomal protein S24<br>Serine/threonine-protein kinase PAK 2<br>Proteasome subunit alpha type-6<br>Regulator of nonsense transcripts 2 |
| Regulation of expression of SLITs and ROBOs | 24 | 60S ribosomal protein L18<br>Proteasome activator complex subunit 2<br>40S ribosomal protein S12<br>Proteasome subunit alpha type-5<br>60S ribosomal protein L10a<br>60S ribosomal protein L23<br>60S ribosomal protein L4<br>Polyadenylate-binding protein 1<br>26S proteasome non-ATPase regulatory subunit 11<br>Proteasome activator complex subunit 1<br>26S proteasome non-ATPase regulatory subunit 7<br>Eukaryotic peptide chain release factor subunit 1<br>60S ribosomal protein L35<br>26S proteasome regulatory subunit 10B<br>60S ribosomal protein L14<br>26S proteasome regulatory subunit 8<br>40S ribosomal protein S14<br>40S ribosomal protein S8<br>Proteasome subunit alpha type-4<br>40S ribosomal protein S10<br>40S ribosomal protein S24                                                                                                                                                |

|                        |    |                                                                                                                                                                                                                                                                                                                                                                                                                                                                                                                                                                                                                                                                                                                                                                                                                                                                                                                                                                                                                                                                                                                                                                                                                                                                                                                                                                                                                                                                                                                                                                                                                                                                                                                                                                                                                                  |
|------------------------|----|----------------------------------------------------------------------------------------------------------------------------------------------------------------------------------------------------------------------------------------------------------------------------------------------------------------------------------------------------------------------------------------------------------------------------------------------------------------------------------------------------------------------------------------------------------------------------------------------------------------------------------------------------------------------------------------------------------------------------------------------------------------------------------------------------------------------------------------------------------------------------------------------------------------------------------------------------------------------------------------------------------------------------------------------------------------------------------------------------------------------------------------------------------------------------------------------------------------------------------------------------------------------------------------------------------------------------------------------------------------------------------------------------------------------------------------------------------------------------------------------------------------------------------------------------------------------------------------------------------------------------------------------------------------------------------------------------------------------------------------------------------------------------------------------------------------------------------|
|                        |    | Proteasome subunit alpha type-6<br>Regulator of nonsense transcripts 2<br>40S ribosomal protein S6                                                                                                                                                                                                                                                                                                                                                                                                                                                                                                                                                                                                                                                                                                                                                                                                                                                                                                                                                                                                                                                                                                                                                                                                                                                                                                                                                                                                                                                                                                                                                                                                                                                                                                                               |
| Metabolism of proteins | 80 | Mothers against decapentaplegic homolog 4<br>Ubiquitin carboxyl-terminal hydrolase 14<br>Cytoplasmic dynein 1 heavy chain 1<br>Golgi-specific brefeldin A-resistance guanine nucleotide exchange factor 1<br>HLA class I histocompatibility antigen, A alpha chain<br>ADP-ribosylation factor 4<br>Thioredoxin<br>Spondin-1<br>26S proteasome non-ATPase regulatory subunit 7<br>E3 ubiquitin-protein ligase BRE1B<br>Plasminogen<br>26S proteasome regulatory subunit 8<br>Apolipoprotein E<br>Apolipoprotein A-I<br>40S ribosomal protein S10<br>Alpha-2-HS-glycoprotein<br>40S ribosomal protein S6<br>Protein disulfide-isomerase<br>Signal transducer and activator of transcription 3<br>60S ribosomal protein L18<br>Coatmer subunit beta'<br>Elongation factor 2<br>26S proteasome non-ATPase regulatory subunit 11<br>Cadherin-2<br>60S ribosomal protein L4<br>Cytoplasmic dynein 1 intermediate chain 2<br>Glutamine--fructose-6-phosphate aminotransferase [isomerizing] 1<br>Tubulin beta-6 chain<br>Elongation factor 1-alpha 1<br>40S ribosomal protein S8<br>Fibrinogen gamma chain<br>Eukaryotic translation initiation factor 2 subunit 2<br>40S ribosomal protein S24<br>Gelsolin<br>Proteasome subunit alpha type-6<br>Eukaryotic translation initiation factor 3 subunit E<br>Fibronectin<br>Coatmer subunit alpha<br>Ceruloplasmin<br>40S ribosomal protein S12<br>Proteasome subunit alpha type-5<br>Calumenin<br>Sec1 family domain-containing protein 1<br>Polyadenylate-binding protein 1<br>Proteasome activator complex subunit 1<br>Asparagine--tRNA ligase, cytoplasmic<br>Osteopontin<br>Protein disulfide-isomerase A3<br>Eukaryotic peptide chain release factor subunit 1<br>60S ribosomal protein L35<br>Probable ATP-dependent RNA helicase DDX5<br>Ubiquitin carboxyl-terminal hydrolase 15 |

|                    |    |                                                                                                                                                                                                                                                                                                                                                                                                                                                                                                                                                                                                                                                                                                                                                                                                                                                                                                                                                                                                                |
|--------------------|----|----------------------------------------------------------------------------------------------------------------------------------------------------------------------------------------------------------------------------------------------------------------------------------------------------------------------------------------------------------------------------------------------------------------------------------------------------------------------------------------------------------------------------------------------------------------------------------------------------------------------------------------------------------------------------------------------------------------------------------------------------------------------------------------------------------------------------------------------------------------------------------------------------------------------------------------------------------------------------------------------------------------|
|                    |    | 26S proteasome regulatory subunit 10B<br>60S ribosomal protein L14<br>LIM and cysteine-rich domains protein 1<br>Protein disulfide-isomerase A6<br>Proteasome subunit alpha type-4<br>Eukaryotic translation initiation factor 5<br>DNA damage-binding protein 1<br>Eukaryotic translation initiation factor 3 subunit A<br>Eukaryotic translation initiation factor 2 subunit 1<br>Serotransferrin<br>Moesin<br>Proteasome activator complex subunit 2<br>Cathepsin D<br>Translocon-associated protein subunit delta<br>60S ribosomal protein L23<br>60S ribosomal protein L10a<br>Tryptophan--tRNA ligase, cytoplasmic<br>Endoplasmic<br>Catenin beta-1<br>Proliferating cell nuclear antigen<br>Mannose-1-phosphate guanylttransferase beta<br>F-actin-capping protein subunit alpha-1<br>Transcription factor p65<br>40S ribosomal protein S14<br>Alpha-1-antitrypsin<br>Tenascin<br>Eukaryotic translation initiation factor 3 subunit L<br>Eukaryotic initiation factor 4A-I                             |
| Translation        | 26 | 40S ribosomal protein S12<br>Polyadenylate-binding protein 1<br>Asparagine--tRNA ligase, cytoplasmic<br>Eukaryotic peptide chain release factor subunit 1<br>60S ribosomal protein L35<br>60S ribosomal protein L14<br>Eukaryotic translation initiation factor 5<br>40S ribosomal protein S10<br>Eukaryotic translation initiation factor 3 subunit A<br>Eukaryotic translation initiation factor 2 subunit 1<br>40S ribosomal protein S6<br>60S ribosomal protein L18<br>Elongation factor 2<br>Translocon-associated protein subunit delta<br>60S ribosomal protein L10a<br>Tryptophan--tRNA ligase, cytoplasmic<br>60S ribosomal protein L23<br>60S ribosomal protein L4<br>Elongation factor 1-alpha 1<br>40S ribosomal protein S14<br>40S ribosomal protein S8<br>Eukaryotic translation initiation factor 3 subunit L<br>Eukaryotic translation initiation factor 2 subunit 2<br>40S ribosomal protein S24<br>Eukaryotic translation initiation factor 3 subunit E<br>Eukaryotic initiation factor 4A-I |
| Post-translational | 15 | Ceruloplasmin<br>Calumenin<br>Endoplasmic                                                                                                                                                                                                                                                                                                                                                                                                                                                                                                                                                                                                                                                                                                                                                                                                                                                                                                                                                                      |

|                                                                                                                             |    |                                                                                                                                                                                                                                                                                                                                                                                                                                                                                                                                                                                                                                                                                                                                                                                                                                                                                                                                                                                                                                                                                       |
|-----------------------------------------------------------------------------------------------------------------------------|----|---------------------------------------------------------------------------------------------------------------------------------------------------------------------------------------------------------------------------------------------------------------------------------------------------------------------------------------------------------------------------------------------------------------------------------------------------------------------------------------------------------------------------------------------------------------------------------------------------------------------------------------------------------------------------------------------------------------------------------------------------------------------------------------------------------------------------------------------------------------------------------------------------------------------------------------------------------------------------------------------------------------------------------------------------------------------------------------|
| protein phosphorylation                                                                                                     |    | Cadherin-2<br>Osteopontin<br>Protein disulfide-isomerase A6<br>Apolipoprotein E<br>Alpha-1-antitrypsin<br>Apolipoprotein A-I<br>Fibrinogen gamma chain<br>Tenascin<br>Serotransferrin<br>Alpha-2-HS-glycoprotein<br>Protein disulfide-isomerase<br>Fibronectin                                                                                                                                                                                                                                                                                                                                                                                                                                                                                                                                                                                                                                                                                                                                                                                                                        |
| Regulation of Insulin-like Growth Factor (IGF) transport and uptake by Insulin-like Growth Factor Binding Proteins (IGFBPs) | 16 | Ceruloplasmin<br>Calumenin<br>Endoplasmic<br>Cadherin-2<br>Osteopontin<br>Plasminogen<br>Protein disulfide-isomerase A6<br>Apolipoprotein E<br>Alpha-1-antitrypsin<br>Apolipoprotein A-I<br>Fibrinogen gamma chain<br>Tenascin<br>Serotransferrin<br>Alpha-2-HS-glycoprotein<br>Protein disulfide-isomerase<br>Fibronectin                                                                                                                                                                                                                                                                                                                                                                                                                                                                                                                                                                                                                                                                                                                                                            |
| Metabolism of RNA                                                                                                           | 34 | 40S ribosomal protein S12<br>Proteasome subunit alpha type-5<br>Double-stranded RNA-specific adenosine deaminase<br>THO complex subunit 4<br>Polyadenylate-binding protein 1<br>Proteasome activator complex subunit 1<br>26S proteasome non-ATPase regulatory subunit 7<br>Insulin-like growth factor 2 mRNA-binding protein 2<br>Eukaryotic peptide chain release factor subunit 1<br>60S ribosomal protein L35<br>Probable ATP-dependent RNA helicase DDX5<br>26S proteasome regulatory subunit 10B<br>60S ribosomal protein L14<br>26S proteasome regulatory subunit 8<br>Proteasome subunit alpha type-4<br>40S ribosomal protein S10<br>MAP kinase-activated protein kinase 2<br>Pre-mRNA 3'-end-processing factor FIP1<br>Polypyrimidine tract-binding protein 1<br>Poly<br>40S ribosomal protein S6<br>60S ribosomal protein L18<br>Proteasome activator complex subunit 2<br>60S ribosomal protein L10a<br>60S ribosomal protein L23<br>60S ribosomal protein L4<br>26S proteasome non-ATPase regulatory subunit 11<br>40S ribosomal protein S14<br>40S ribosomal protein S8 |

|                         |    |                                                                                                                                                                                                                                                                                                                                                                                                                                                                                                                                                                  |
|-------------------------|----|------------------------------------------------------------------------------------------------------------------------------------------------------------------------------------------------------------------------------------------------------------------------------------------------------------------------------------------------------------------------------------------------------------------------------------------------------------------------------------------------------------------------------------------------------------------|
|                         |    | U2 small nuclear ribonucleoprotein A'<br>40S ribosomal protein S24<br>Proteasome subunit alpha type-6<br>Regulator of nonsense transcripts 2<br>Eukaryotic initiation factor 4A-I                                                                                                                                                                                                                                                                                                                                                                                |
| Programmed Cell Death   | 17 | Plectin<br>Proteasome activator complex subunit 2<br>Flotillin-1<br>Proteasome subunit alpha type-5<br>26S proteasome non-ATPase regulatory subunit 11<br>Proteasome activator complex subunit 1<br>Catenin beta-1<br>26S proteasome non-ATPase regulatory subunit 7<br>26S proteasome regulatory subunit 10B<br>26S proteasome regulatory subunit 8<br>Vimentin<br>Proteasome subunit alpha type-4<br>Gelsolin<br>Serine/threonine-protein kinase PAK 2<br>Proteasome subunit alpha type-6<br>Flotillin-2<br>Signal transducer and activator of transcription 3 |
| Apoptosis               | 15 | Plectin<br>Proteasome activator complex subunit 2<br>Proteasome subunit alpha type-5<br>26S proteasome non-ATPase regulatory subunit 11<br>Proteasome activator complex subunit 1<br>Catenin beta-1<br>26S proteasome non-ATPase regulatory subunit 7<br>26S proteasome regulatory subunit 10B<br>26S proteasome regulatory subunit 8<br>Vimentin<br>Proteasome subunit alpha type-4<br>Gelsolin<br>Serine/threonine-protein kinase PAK 2<br>Proteasome subunit alpha type-6<br>Signal transducer and activator of transcription 3                               |
| Regulation of Apoptosis | 10 | Proteasome activator complex subunit 2<br>26S proteasome regulatory subunit 10B<br>Proteasome subunit alpha type-5<br>26S proteasome regulatory subunit 8<br>Proteasome subunit alpha type-4<br>26S proteasome non-ATPase regulatory subunit 11<br>Proteasome activator complex subunit 1<br>Serine/threonine-protein kinase PAK 2<br>Proteasome subunit alpha type-6<br>26S proteasome non-ATPase regulatory subunit 7                                                                                                                                          |

\*: Signal transducer and activator of transcription 1-alpha/beta was counted as 3 entities in Reactome

\*\*: Signal transducer and activator of transcription 1-alpha/beta was counted as 2 entities in Reactome

| Selected downregulated pathways                  |                    |                                                                                                                                                                                                                                                                                                                                                                                                                                                                                                                                                                                                                                                                                                                                                                                                                                                                                                                                    |
|--------------------------------------------------|--------------------|------------------------------------------------------------------------------------------------------------------------------------------------------------------------------------------------------------------------------------------------------------------------------------------------------------------------------------------------------------------------------------------------------------------------------------------------------------------------------------------------------------------------------------------------------------------------------------------------------------------------------------------------------------------------------------------------------------------------------------------------------------------------------------------------------------------------------------------------------------------------------------------------------------------------------------|
| Pathway name                                     | Number of proteins | Protein names                                                                                                                                                                                                                                                                                                                                                                                                                                                                                                                                                                                                                                                                                                                                                                                                                                                                                                                      |
| Nervous system development<br>+<br>Axon guidance | 29                 | Dynamin-1<br>Spectrin beta chain, non-erythrocytic 2<br>Contactin-1<br>Spectrin alpha chain, non-erythrocytic 1<br>CLIP-associating protein 2<br>Dynamin-3<br>Neural cell adhesion molecule L1<br>Endophilin-A1<br>Neural cell adhesion molecule 1<br>Protein kinase C alpha type<br>Clathrin heavy chain 1<br>cAMP-dependent protein kinase catalytic subunit beta<br>Dihydropyrimidinase-related protein 1<br>Clathrin light chain B<br>Dihydropyrimidinase-related protein 2<br>Rap1 GTPase-activating protein 1<br>Contactin-associated protein 1<br>Neurofascin<br>Ankyrin-3<br>Tubulin beta-3 chain<br>Ankyrin-2<br>Spectrin beta chain, non-erythrocytic 1<br>Dihydropyrimidinase-related protein 5<br>AP-2 complex subunit alpha-1<br>cAMP-dependent protein kinase catalytic subunit alpha<br>Tubulin alpha-4A chain<br>Dihydropyrimidinase-related protein 4<br>Tubulin beta-4A chain<br>Neuronal cell adhesion molecule |
| L1CAM interactions                               | 20                 | Contactin-associated protein 1<br>Dynamin-1<br>Spectrin beta chain, non-erythrocytic 2<br>Contactin-1<br>Spectrin alpha chain, non-erythrocytic 1<br>Neurofascin<br>Ankyrin-3<br>Tubulin beta-3 chain<br>Dynamin-3<br>Ankyrin-2<br>Spectrin beta chain, non-erythrocytic 1<br>Neural cell adhesion molecule L1<br>AP-2 complex subunit alpha-1<br>Endophilin-A1<br>Neural cell adhesion molecule 1<br>Clathrin heavy chain 1<br>Tubulin alpha-4A chain<br>Tubulin beta-4A chain<br>Dihydropyrimidinase-related protein 2<br>Neuronal cell adhesion molecule                                                                                                                                                                                                                                                                                                                                                                        |
| Metabolism                                       | 82                 | Potassium voltage-gated channel subfamily B member 1                                                                                                                                                                                                                                                                                                                                                                                                                                                                                                                                                                                                                                                                                                                                                                                                                                                                               |

|  |  |                                                                                                                                                                                                                                                                                                                                                                                                                                                                                                                                                                                                                                                                                                                                                                                                                                                                                                                                                                                                                                                                                                                                                                                                                                                                                                                                                                                                                                                                                                                                                                                                                                                                                                                                                                                                                                                                                                                                                                                                                                                                                                                                                                                                                                                                                                                                                                                                                                                                                                                                                                                                                                                                                                                                |
|--|--|--------------------------------------------------------------------------------------------------------------------------------------------------------------------------------------------------------------------------------------------------------------------------------------------------------------------------------------------------------------------------------------------------------------------------------------------------------------------------------------------------------------------------------------------------------------------------------------------------------------------------------------------------------------------------------------------------------------------------------------------------------------------------------------------------------------------------------------------------------------------------------------------------------------------------------------------------------------------------------------------------------------------------------------------------------------------------------------------------------------------------------------------------------------------------------------------------------------------------------------------------------------------------------------------------------------------------------------------------------------------------------------------------------------------------------------------------------------------------------------------------------------------------------------------------------------------------------------------------------------------------------------------------------------------------------------------------------------------------------------------------------------------------------------------------------------------------------------------------------------------------------------------------------------------------------------------------------------------------------------------------------------------------------------------------------------------------------------------------------------------------------------------------------------------------------------------------------------------------------------------------------------------------------------------------------------------------------------------------------------------------------------------------------------------------------------------------------------------------------------------------------------------------------------------------------------------------------------------------------------------------------------------------------------------------------------------------------------------------------|
|  |  | <p>Electrogenic aspartate/glutamate antiporter SLC25A12, mitochondrial</p> <p>Glutathione hydrolase 7</p> <p>Pyruvate dehydrogenase E1 component subunit alpha, somatic form, mitochondrial</p> <p>Malate dehydrogenase, mitochondrial</p> <p>Dihydrolipoyllysine-residue acetyltransferase component of pyruvate dehydrogenase complex, mitochondrial</p> <p>Malate dehydrogenase, cytoplasmic</p> <p>NADH dehydrogenase [ubiquinone] 1 alpha subcomplex subunit 2</p> <p>ATP synthase subunit gamma, mitochondrial</p> <p>Iron-sulfur cluster assembly 2 homolog, mitochondrial</p> <p>Isocitrate dehydrogenase [NAD] subunit alpha, mitochondrial</p> <p>5'-3' exonuclease PLD3</p> <p>Isocitrate dehydrogenase [NAD] subunit beta, mitochondrial</p> <p>Creatine kinase U-type, mitochondrial</p> <p>Succinate--CoA ligase [ADP-forming] subunit beta, mitochondrial</p> <p>NADH dehydrogenase [ubiquinone] flavoprotein 2, mitochondrial</p> <p>Citrate synthase, mitochondrial</p> <p>Mitochondrial 2-oxoglutarate/malate carrier protein</p> <p>Aspartate aminotransferase, mitochondrial</p> <p>Leucine-rich PPR motif-containing protein, mitochondrial</p> <p>L-lactate dehydrogenase B chain</p> <p>Triosephosphate isomerase</p> <p>Adenylosuccinate synthetase isozyme 1</p> <p>Fructose-bisphosphate aldolase C</p> <p>NADH dehydrogenase [ubiquinone] 1 alpha subcomplex subunit 9, mitochondrial</p> <p>Electrogenic aspartate/glutamate antiporter SLC25A13, mitochondrial</p> <p>cAMP-dependent protein kinase catalytic subunit beta</p> <p>Guanine nucleotide-binding protein G</p> <p>Cytochrome c oxidase subunit 5A, mitochondrial</p> <p>Fumarate hydratase, mitochondrial</p> <p>Cytochrome c oxidase subunit 5B, mitochondrial</p> <p>Isocitrate dehydrogenase [NAD] subunit gamma, mitochondrial</p> <p>Retinol dehydrogenase 11</p> <p>NADH-ubiquinone oxidoreductase 75 kDa subunit, mitochondrial</p> <p>ATP synthase subunit O, mitochondrial</p> <p>Cytosolic acyl coenzyme A thioester hydrolase</p> <p>Prostaglandin E synthase 2</p> <p>Pyruvate dehydrogenase E1 component subunit beta, mitochondrial</p> <p>Mitochondrial pyruvate carrier 2</p> <p>NADH dehydrogenase [ubiquinone] iron-sulfur protein 7, mitochondrial</p> <p>Guanine nucleotide-binding protein G</p> <p>Aconitate hydratase, mitochondrial</p> <p>Guanine nucleotide-binding protein G</p> <p>AMP deaminase 2</p> <p>Cytochrome c1, heme protein, mitochondrial</p> <p>Gamma-enolase</p> <p>Dihydrolipoyl dehydrogenase, mitochondrial</p> <p>Guanine nucleotide-binding protein subunit alpha-11</p> <p>ATP synthase subunit f, mitochondrial</p> <p>Vesicle-associated membrane protein-associated protein B/C</p> |
|--|--|--------------------------------------------------------------------------------------------------------------------------------------------------------------------------------------------------------------------------------------------------------------------------------------------------------------------------------------------------------------------------------------------------------------------------------------------------------------------------------------------------------------------------------------------------------------------------------------------------------------------------------------------------------------------------------------------------------------------------------------------------------------------------------------------------------------------------------------------------------------------------------------------------------------------------------------------------------------------------------------------------------------------------------------------------------------------------------------------------------------------------------------------------------------------------------------------------------------------------------------------------------------------------------------------------------------------------------------------------------------------------------------------------------------------------------------------------------------------------------------------------------------------------------------------------------------------------------------------------------------------------------------------------------------------------------------------------------------------------------------------------------------------------------------------------------------------------------------------------------------------------------------------------------------------------------------------------------------------------------------------------------------------------------------------------------------------------------------------------------------------------------------------------------------------------------------------------------------------------------------------------------------------------------------------------------------------------------------------------------------------------------------------------------------------------------------------------------------------------------------------------------------------------------------------------------------------------------------------------------------------------------------------------------------------------------------------------------------------------------|



|                                                                |    |                                                                                                                                                                                                                                                                                                                                                                                                                                                                                                                                                                                                                                                                                                                                                                                                                                                                                                                                                                                                                                                                                                                                                                                                                                                                                                                                                                                                                                                                                                                                                                                                                                                              |
|----------------------------------------------------------------|----|--------------------------------------------------------------------------------------------------------------------------------------------------------------------------------------------------------------------------------------------------------------------------------------------------------------------------------------------------------------------------------------------------------------------------------------------------------------------------------------------------------------------------------------------------------------------------------------------------------------------------------------------------------------------------------------------------------------------------------------------------------------------------------------------------------------------------------------------------------------------------------------------------------------------------------------------------------------------------------------------------------------------------------------------------------------------------------------------------------------------------------------------------------------------------------------------------------------------------------------------------------------------------------------------------------------------------------------------------------------------------------------------------------------------------------------------------------------------------------------------------------------------------------------------------------------------------------------------------------------------------------------------------------------|
|                                                                |    | <p>Membrane-associated phosphatidylinositol transfer protein 1</p> <p>Guanine nucleotide-binding protein G</p> <p>ATP synthase protein 8</p> <p>Glutamine synthetase</p> <p>Guanine nucleotide-binding protein G</p> <p>ATP synthase subunit alpha, mitochondrial</p> <p>Adenosylhomocysteinase</p> <p>ATP synthase-coupling factor 6, mitochondrial</p> <p>ATP synthase F</p> <p>Protein kinase C alpha type</p> <p>Aspartate aminotransferase, cytoplasmic</p> <p>Succinate dehydrogenase [ubiquinone] flavoprotein subunit, mitochondrial</p> <p>ATP synthase subunit e, mitochondrial</p> <p>Glutaminase kidney isoform, mitochondrial</p> <p>Adenylate kinase isoenzyme 1</p> <p>Cytochrome c oxidase subunit 2</p> <p>L-2-hydroxyglutarate dehydrogenase, mitochondrial</p> <p>Vesicle-associated membrane protein 2</p> <p>Dihydrolipoyllysine-residue succinyltransferase component of 2-oxoglutarate dehydrogenase complex, mitochondrial</p> <p>Succinate--CoA ligase [ADP/GDP-forming] subunit alpha, mitochondrial</p> <p>Gephyrin [Includes: Molybdopterin adenyltransferase</p> <p>Oxysterol-binding protein-related protein 1</p> <p>Phosphatidylinositol 5-phosphate 4-kinase type-2 beta</p> <p>Synaptojanin-1</p> <p>Methylglutaconyl-CoA hydratase, mitochondrial</p> <p>Hexokinase-1</p> <p>cAMP-dependent protein kinase catalytic subunit alpha</p> <p>Synaptosomal-associated protein 25</p> <p>NADH dehydrogenase [ubiquinone] flavoprotein 1, mitochondrial</p> <p>Guanine nucleotide-binding protein subunit beta-5</p> <p>Voltage-dependent anion-selective channel protein 1</p> <p>ATP synthase subunit beta, mitochondrial</p> |
| Integration of energy metabolism                               | 13 | <p>Potassium voltage-gated channel subfamily B member 1</p> <p>Guanine nucleotide-binding protein subunit alpha-11</p> <p>Guanine nucleotide-binding protein G</p> <p>Guanine nucleotide-binding protein G</p> <p>cAMP-dependent protein kinase catalytic subunit alpha</p> <p>Guanine nucleotide-binding protein G</p> <p>Guanine nucleotide-binding protein G</p> <p>Synaptosomal-associated protein 25</p> <p>Protein kinase C alpha type</p> <p>cAMP-dependent protein kinase catalytic subunit beta</p> <p>Guanine nucleotide-binding protein subunit beta-5</p> <p>Guanine nucleotide-binding protein G</p> <p>Vesicle-associated membrane protein 2</p>                                                                                                                                                                                                                                                                                                                                                                                                                                                                                                                                                                                                                                                                                                                                                                                                                                                                                                                                                                                               |
| The citric acid (TCA) cycle and respiratory electron transport | 39 | <p>Pyruvate dehydrogenase E1 component subunit alpha, somatic form, mitochondrial</p> <p>Malate dehydrogenase, mitochondrial</p> <p>Dihydrolipoyllysine-residue acetyltransferase component of pyruvate dehydrogenase complex, mitochondrial</p> <p>ATP synthase subunit f, mitochondrial</p> <p>NADH dehydrogenase [ubiquinone] 1 alpha subcomplex subunit 2</p> <p>ATP synthase subunit gamma, mitochondrial</p>                                                                                                                                                                                                                                                                                                                                                                                                                                                                                                                                                                                                                                                                                                                                                                                                                                                                                                                                                                                                                                                                                                                                                                                                                                           |

|                 |    |                                                                                                                                                                                                                                                                                                                                                                                                                                                                                                                                                                                                                                                                                                                                                                                                                                                                                                                                                                                                                                                                                                                                                                                                                                                                                                                                                                                                                                                                                                                                                                                                                                                                                                                                                                                                                                                                                                                                                                               |
|-----------------|----|-------------------------------------------------------------------------------------------------------------------------------------------------------------------------------------------------------------------------------------------------------------------------------------------------------------------------------------------------------------------------------------------------------------------------------------------------------------------------------------------------------------------------------------------------------------------------------------------------------------------------------------------------------------------------------------------------------------------------------------------------------------------------------------------------------------------------------------------------------------------------------------------------------------------------------------------------------------------------------------------------------------------------------------------------------------------------------------------------------------------------------------------------------------------------------------------------------------------------------------------------------------------------------------------------------------------------------------------------------------------------------------------------------------------------------------------------------------------------------------------------------------------------------------------------------------------------------------------------------------------------------------------------------------------------------------------------------------------------------------------------------------------------------------------------------------------------------------------------------------------------------------------------------------------------------------------------------------------------------|
|                 |    | <p>Isocitrate dehydrogenase [NAD] subunit alpha, mitochondrial</p> <p>ATP synthase protein 8</p> <p>Isocitrate dehydrogenase [NAD] subunit beta, mitochondrial</p> <p>Succinate--CoA ligase [ADP-forming] subunit beta, mitochondrial</p> <p>NADH dehydrogenase [ubiquinone] flavoprotein 2, mitochondrial</p> <p>Citrate synthase, mitochondrial</p> <p>ATP synthase subunit alpha, mitochondrial</p> <p>Leucine-rich PPR motif-containing protein, mitochondrial</p> <p>ATP synthase-coupling factor 6, mitochondrial</p> <p>ATP synthase F</p> <p>Succinate dehydrogenase [ubiquinone] flavoprotein subunit, mitochondrial</p> <p>L-lactate dehydrogenase B chain</p> <p>ATP synthase subunit e, mitochondrial</p> <p>Cytochrome c oxidase subunit 2</p> <p>NADH dehydrogenase [ubiquinone] 1 alpha subcomplex subunit 9, mitochondrial</p> <p>L-2-hydroxyglutarate dehydrogenase, mitochondrial</p> <p>Cytochrome c oxidase subunit 5A, mitochondrial</p> <p>Fumarate hydratase, mitochondrial</p> <p>Cytochrome c oxidase subunit 5B, mitochondrial</p> <p>Isocitrate dehydrogenase [NAD] subunit gamma, mitochondrial</p> <p>Succinate--CoA ligase [ADP/GDP-forming] subunit alpha, mitochondrial</p> <p>Dihydrolipoyllysine-residue succinyltransferase component of 2-oxoglutarate dehydrogenase complex, mitochondrial</p> <p>ATP synthase subunit O, mitochondrial</p> <p>NADH-ubiquinone oxidoreductase 75 kDa subunit, mitochondrial</p> <p>Pyruvate dehydrogenase E1 component subunit beta, mitochondrial</p> <p>Mitochondrial pyruvate carrier 2</p> <p>NADH dehydrogenase [ubiquinone] iron-sulfur protein 7, mitochondrial</p> <p>Aconitate hydratase, mitochondrial</p> <p>Cytochrome c1, heme protein, mitochondrial</p> <p>NADH dehydrogenase [ubiquinone] flavoprotein 1, mitochondrial</p> <p>Voltage-dependent anion-selective channel protein 1</p> <p>ATP synthase subunit beta, mitochondrial</p> <p>Dihydrolipoyl dehydrogenase, mitochondrial</p> |
| Neuronal System | 42 | <p>Band 4.1-like protein 1</p> <p>Calcium/calmodulin-dependent protein kinase type II subunit gamma</p> <p>Potassium voltage-gated channel subfamily B member 1</p> <p>Calcium/calmodulin-dependent protein kinase type II subunit beta</p> <p>Guanine nucleotide-binding protein G</p> <p>Reticulon-3</p> <p>Glutamine synthetase</p> <p>Synapsin-1</p> <p>Guanine nucleotide-binding protein G</p> <p>Glutamate decarboxylase 2</p> <p>Ras-related protein Rab-3A</p> <p>Neurexin-3</p> <p>Neurofilament light polypeptide</p> <p>Protein kinase C alpha type</p> <p>Glutaminase kidney isoform, mitochondrial</p> <p>cAMP-dependent protein kinase catalytic subunit beta</p>                                                                                                                                                                                                                                                                                                                                                                                                                                                                                                                                                                                                                                                                                                                                                                                                                                                                                                                                                                                                                                                                                                                                                                                                                                                                                              |

|                                       |    |                                                                                                                                                                                                                                                                                                                                                                                                                                                                                                                                                                                                                                                                                                                                                                                                                                                                                                                                                                                                                                                                                                                                                                                                                                                                          |
|---------------------------------------|----|--------------------------------------------------------------------------------------------------------------------------------------------------------------------------------------------------------------------------------------------------------------------------------------------------------------------------------------------------------------------------------------------------------------------------------------------------------------------------------------------------------------------------------------------------------------------------------------------------------------------------------------------------------------------------------------------------------------------------------------------------------------------------------------------------------------------------------------------------------------------------------------------------------------------------------------------------------------------------------------------------------------------------------------------------------------------------------------------------------------------------------------------------------------------------------------------------------------------------------------------------------------------------|
|                                       |    | <p>Vesicle-associated membrane protein 2</p> <p>Guanine nucleotide-binding protein G</p> <p>Synapsin-2</p> <p>4-aminobutyrate aminotransferase, mitochondrial</p> <p>Disks large homolog 2</p> <p>Gamma-aminobutyric acid receptor subunit beta-2</p> <p>Gamma-aminobutyric acid receptor subunit beta-3</p> <p>Tubulin beta-3 chain</p> <p>Vesicular inhibitory amino acid transporter</p> <p>Neurologin-2</p> <p>Vesicular glutamate transporter 1</p> <p>Band 4.1-like protein 3</p> <p>AP-2 complex subunit alpha-1</p> <p>cAMP-dependent protein kinase catalytic subunit alpha</p> <p>Guanine nucleotide-binding protein G</p> <p>Glutamate decarboxylase 1</p> <p>Synaptotagmin-1</p> <p>Peripheral plasma membrane protein CASK</p> <p>Guanine nucleotide-binding protein G</p> <p>Synaptosomal-associated protein 25</p> <p>Tubulin alpha-4A chain</p> <p>Tubulin beta-4A chain</p> <p>Guanine nucleotide-binding protein subunit beta-5</p> <p>Complexin-1</p> <p>Protein phosphatase 1E</p> <p>Vesicle-fusing ATPase</p>                                                                                                                                                                                                                                      |
| Transmission across Chemical Synapses | 37 | <p>Band 4.1-like protein 1</p> <p>Calcium/calmodulin-dependent protein kinase type II subunit gamma</p> <p>Calcium/calmodulin-dependent protein kinase type II subunit beta</p> <p>Guanine nucleotide-binding protein G</p> <p>Glutamine synthetase</p> <p>Synapsin-1</p> <p>Glutamate decarboxylase 2</p> <p>Guanine nucleotide-binding protein G</p> <p>Ras-related protein Rab-3A</p> <p>Neurofilament light polypeptide</p> <p>Protein kinase C alpha type</p> <p>Glutaminase kidney isoform, mitochondrial</p> <p>cAMP-dependent protein kinase catalytic subunit beta</p> <p>Guanine nucleotide-binding protein G</p> <p>Vesicle-associated membrane protein 2</p> <p>Synapsin-2</p> <p>4-aminobutyrate aminotransferase, mitochondrial</p> <p>Disks large homolog 2</p> <p>Gamma-aminobutyric acid receptor subunit beta-2</p> <p>Gamma-aminobutyric acid receptor subunit beta-3</p> <p>Tubulin beta-3 chain</p> <p>Vesicular inhibitory amino acid transporter</p> <p>Vesicular glutamate transporter 1</p> <p>AP-2 complex subunit alpha-1</p> <p>cAMP-dependent protein kinase catalytic subunit alpha</p> <p>Guanine nucleotide-binding protein G</p> <p>Peripheral plasma membrane protein CASK</p> <p>Glutamate decarboxylase 1</p> <p>Synaptotagmin-1</p> |

|                                                                 |    |                                                                                                                                                                                                                                                                                                                                                                                                                                                                                                                                                                                                                                                                                                                                                                                                                                                                                                                                                                                                                                                         |
|-----------------------------------------------------------------|----|---------------------------------------------------------------------------------------------------------------------------------------------------------------------------------------------------------------------------------------------------------------------------------------------------------------------------------------------------------------------------------------------------------------------------------------------------------------------------------------------------------------------------------------------------------------------------------------------------------------------------------------------------------------------------------------------------------------------------------------------------------------------------------------------------------------------------------------------------------------------------------------------------------------------------------------------------------------------------------------------------------------------------------------------------------|
|                                                                 |    | <p>Guanine nucleotide-binding protein G</p> <p>Synaptosomal-associated protein 25</p> <p>Tubulin alpha-4A chain</p> <p>Tubulin beta-4A chain</p> <p>Guanine nucleotide-binding protein subunit beta-5</p> <p>Complexin-1</p> <p>Protein phosphatase 1E</p> <p>Vesicle-fusing ATPase</p>                                                                                                                                                                                                                                                                                                                                                                                                                                                                                                                                                                                                                                                                                                                                                                 |
| Neurotransmitter release cycle                                  | 14 | <p>Vesicular inhibitory amino acid transporter</p> <p>Vesicular glutamate transporter 1</p> <p>Synapsin-1</p> <p>Glutamate decarboxylase 2</p> <p>Ras-related protein Rab-3A</p> <p>Glutamate decarboxylase 1</p> <p>Peripheral plasma membrane protein CASK</p> <p>Synaptotagmin-1</p> <p>Synaptosomal-associated protein 25</p> <p>Glutaminase kidney isoform, mitochondrial</p> <p>Vesicle-associated membrane protein 2</p> <p>Complexin-1</p> <p>Synapsin-2</p> <p>4-aminobutyrate aminotransferase, mitochondrial</p>                                                                                                                                                                                                                                                                                                                                                                                                                                                                                                                             |
| Neurotransmitter receptors and postsynaptic signal transmission | 23 | <p>Band 4.1-like protein 1</p> <p>Calcium/calmodulin-dependent protein kinase type II subunit gamma</p> <p>Disks large homolog 2</p> <p>Calcium/calmodulin-dependent protein kinase type II subunit beta</p> <p>Gamma-aminobutyric acid receptor subunit beta-2</p> <p>Gamma-aminobutyric acid receptor subunit beta-3</p> <p>Tubulin beta-3 chain</p> <p>Guanine nucleotide-binding protein G</p> <p>AP-2 complex subunit alpha-1</p> <p>cAMP-dependent protein kinase catalytic subunit alpha</p> <p>Guanine nucleotide-binding protein G</p> <p>Guanine nucleotide-binding protein G</p> <p>Peripheral plasma membrane protein CASK</p> <p>Guanine nucleotide-binding protein G</p> <p>Neurofilament light polypeptide</p> <p>Protein kinase C alpha type</p> <p>Tubulin alpha-4A chain</p> <p>Tubulin beta-4A chain</p> <p>cAMP-dependent protein kinase catalytic subunit beta</p> <p>Guanine nucleotide-binding protein subunit beta-5</p> <p>Guanine nucleotide-binding protein G</p> <p>Protein phosphatase 1E</p> <p>Vesicle-fusing ATPase</p> |
| Organelle biogenesis and maintenance                            | 20 | <p>ATP synthase subunit O, mitochondrial</p> <p>ATP synthase subunit f, mitochondrial</p> <p>Tubulin beta-3 chain</p> <p>ATP synthase subunit gamma, mitochondrial</p> <p>ATP synthase protein 8</p> <p>Stress-70 protein, mitochondrial</p> <p>cAMP-dependent protein kinase catalytic subunit alpha</p> <p>14-3-3 protein gamma</p> <p>ATP synthase subunit alpha, mitochondrial</p> <p>ATP synthase-coupling factor 6, mitochondrial</p>                                                                                                                                                                                                                                                                                                                                                                                                                                                                                                                                                                                                             |

|                              |    |                                                                                                                                                                                                                                                                                                                                                                                                                                                                                                                                                                                                                                                                                              |
|------------------------------|----|----------------------------------------------------------------------------------------------------------------------------------------------------------------------------------------------------------------------------------------------------------------------------------------------------------------------------------------------------------------------------------------------------------------------------------------------------------------------------------------------------------------------------------------------------------------------------------------------------------------------------------------------------------------------------------------------|
|                              |    | ATP synthase F<br>Dynein light chain 2, cytoplasmic<br>Tubulin alpha-4A chain<br>Rab-3A-interacting protein<br>ATP synthase subunit e, mitochondrial<br>Tubulin beta-4A chain<br>Platelet-activating factor acetylhydrolase IB subunit beta<br>MICOS complex subunit MIC60<br>ATP synthase subunit beta, mitochondrial<br>Superoxide dismutase [Mn], mitochondrial                                                                                                                                                                                                                                                                                                                           |
| Mitochondrial biogenesis     | 12 | ATP synthase subunit alpha, mitochondrial<br>ATP synthase-coupling factor 6, mitochondrial<br>ATP synthase subunit O, mitochondrial<br>ATP synthase F<br>ATP synthase subunit f, mitochondrial<br>ATP synthase subunit e, mitochondrial<br>ATP synthase subunit gamma, mitochondrial<br>ATP synthase protein 8<br>MICOS complex subunit MIC60<br>ATP synthase subunit beta, mitochondrial<br>Stress-70 protein, mitochondrial<br>Superoxide dismutase [Mn], mitochondrial                                                                                                                                                                                                                    |
| Cristae formation            | 11 | ATP synthase subunit alpha, mitochondrial<br>ATP synthase-coupling factor 6, mitochondrial<br>ATP synthase subunit O, mitochondrial<br>ATP synthase F<br>ATP synthase subunit f, mitochondrial<br>ATP synthase subunit e, mitochondrial<br>ATP synthase subunit gamma, mitochondrial<br>ATP synthase protein 8<br>MICOS complex subunit MIC60<br>ATP synthase subunit beta, mitochondrial<br>Stress-70 protein, mitochondrial                                                                                                                                                                                                                                                                |
| Protein localization         | 14 | Electrogenic aspartate/glutamate antiporter SLC25A12, mitochondrial<br>Isocitrate dehydrogenase [NAD] subunit gamma, mitochondrial<br>ADP/ATP translocase 1<br>Stress-70 protein, mitochondrial<br>Mitochondrial import receptor subunit TOM22 homolog<br>Citrate synthase, mitochondrial<br>Aconitate hydratase, mitochondrial<br>ATP synthase subunit alpha, mitochondrial<br>Mitochondrial import receptor subunit TOM70<br>Cytochrome c1, heme protein, mitochondrial<br>Electrogenic aspartate/glutamate antiporter SLC25A13, mitochondrial<br>Vesicle-associated membrane protein 2<br>Voltage-dependent anion-selective channel protein 1<br>ATP synthase subunit beta, mitochondrial |
| Mitochondrial protein import | 13 | Electrogenic aspartate/glutamate antiporter SLC25A12, mitochondrial<br>Isocitrate dehydrogenase [NAD] subunit gamma, mitochondrial<br>ADP/ATP translocase 1<br>Stress-70 protein, mitochondrial<br>Mitochondrial import receptor subunit TOM22 homolog<br>Citrate synthase, mitochondrial<br>Aconitate hydratase, mitochondrial                                                                                                                                                                                                                                                                                                                                                              |

|                               |   |                                                                                                                                                                                                                                                                                                                                                    |
|-------------------------------|---|----------------------------------------------------------------------------------------------------------------------------------------------------------------------------------------------------------------------------------------------------------------------------------------------------------------------------------------------------|
|                               |   | ATP synthase subunit alpha, mitochondrial<br>Mitochondrial import receptor subunit TOM70<br>Cytochrome c1, heme protein, mitochondrial<br>Electrogenic aspartate/glutamate antiporter SLC25A13, mitochondrial<br>Voltage-dependent anion-selective channel protein 1<br>ATP synthase subunit beta, mitochondrial                                   |
| Visual phototransduction      | 9 | Guanylyl cyclase-activating protein 1<br>cGMP-gated cation channel alpha-1<br>Guanine nucleotide-binding protein G<br>Retinol dehydrogenase 11<br>Protein kinase C alpha type<br>Short-wave-sensitive opsin 1<br>Guanine nucleotide-binding protein G<br>Guanine nucleotide-binding protein subunit beta-5<br>Guanine nucleotide-binding protein G |
| The phototransduction cascade | 7 | Guanylyl cyclase-activating protein 1<br>cGMP-gated cation channel alpha-1<br>Guanine nucleotide-binding protein G<br>Protein kinase C alpha type<br>Guanine nucleotide-binding protein G<br>Guanine nucleotide-binding protein subunit beta-5<br>Guanine nucleotide-binding protein G                                                             |
