# Supplementary material for: Large-Scale Protein Analysis of Experimental Retinal Artery Occlusion
Source: MDPI journal article supplement (doi:10.3390/ijms24097919), 2023-04-27
Supplement: s1 [file s1]

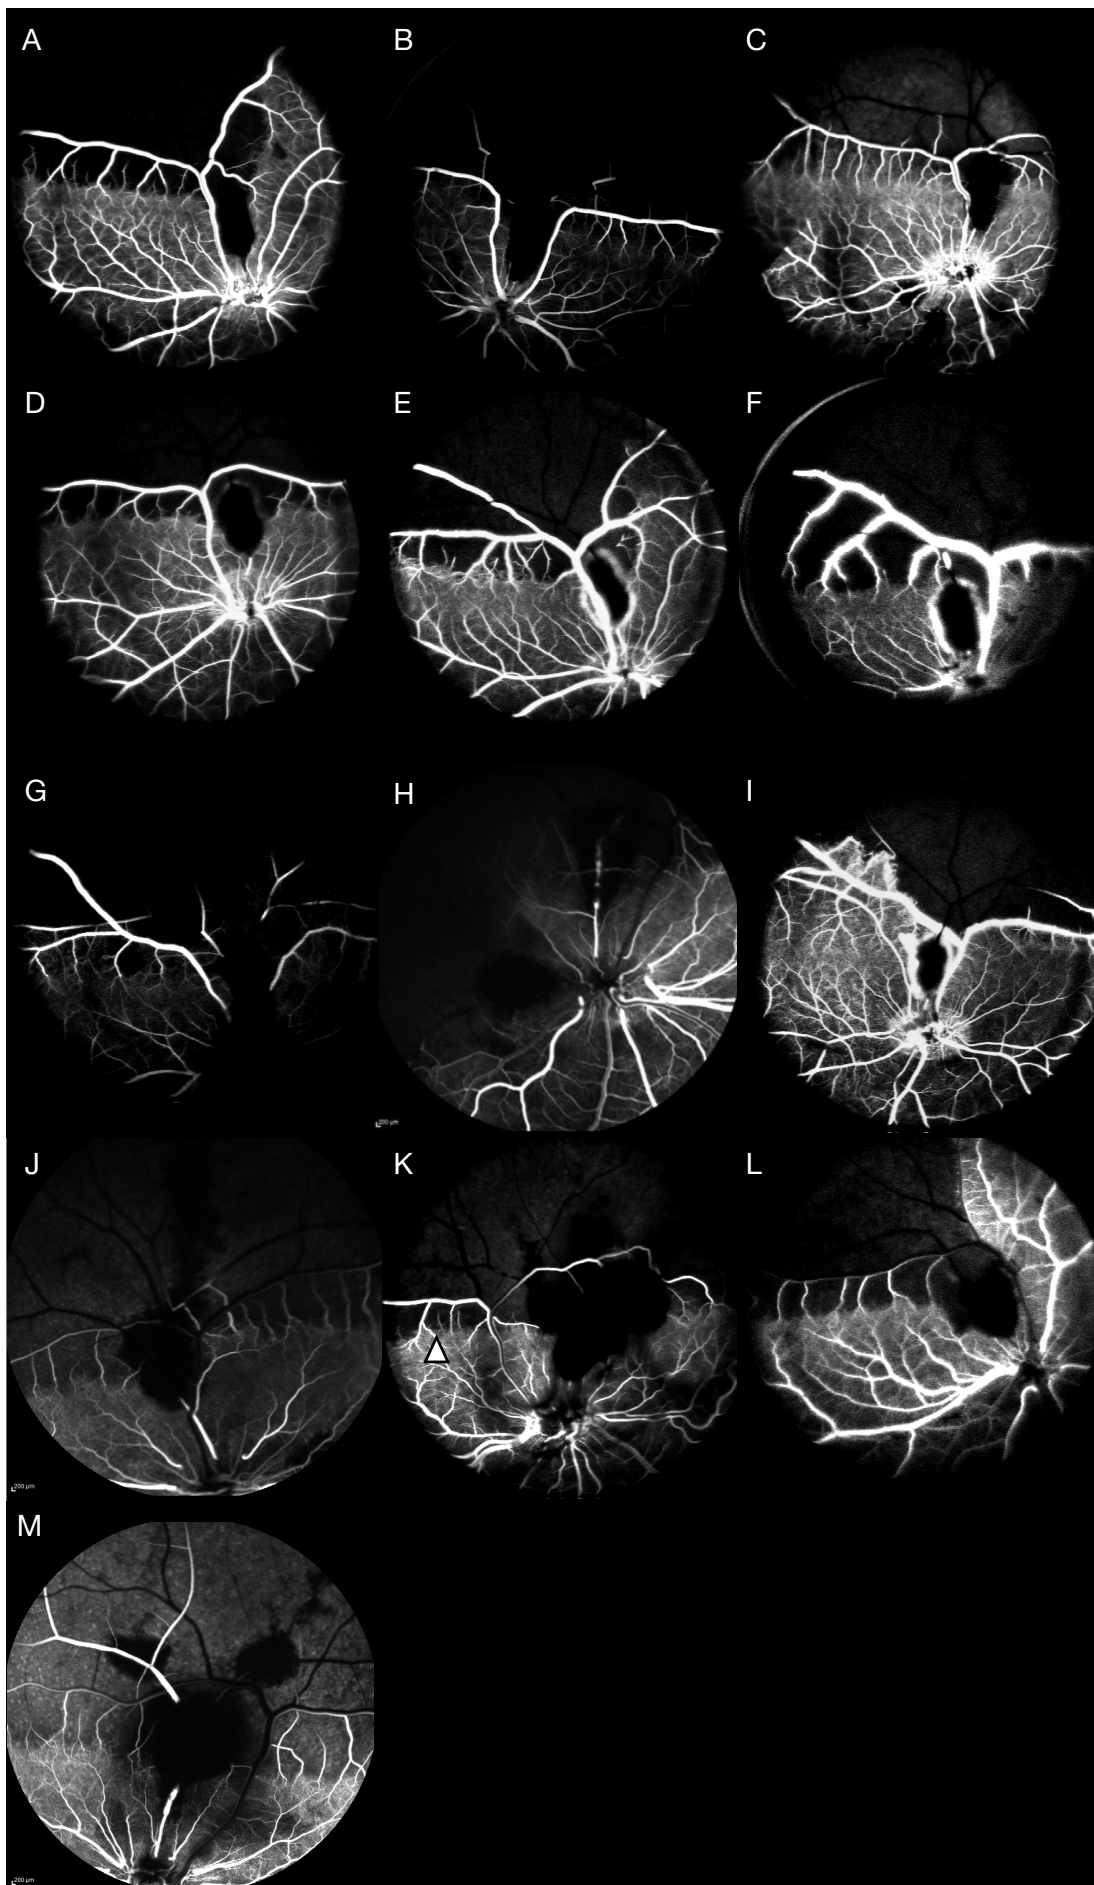

Supplementary figure1: Presentation of a flourescein angiography image from each animal in the study. A: Day 1, 14s; B: Day 3, 22s; C: Day 3, 20s; D: Day 1, 23s; E: Day 1, 23s; F: Day 1, 70s; G: Day 3, 30s; H: Day 5, 9s; I: day 1, 25s; J: day 5, 8s; K: Day 2, 15s; L: Day 1, 11s; M: Day 5, 22s.
