# Supplementary material for: Large-Scale Protein Analysis of Experimental Retinal Artery Occlusion
Source: MDPI journal article supplement (doi:10.3390/ijms24097919), 2023-04-27
Supplement: s1 [file s1]

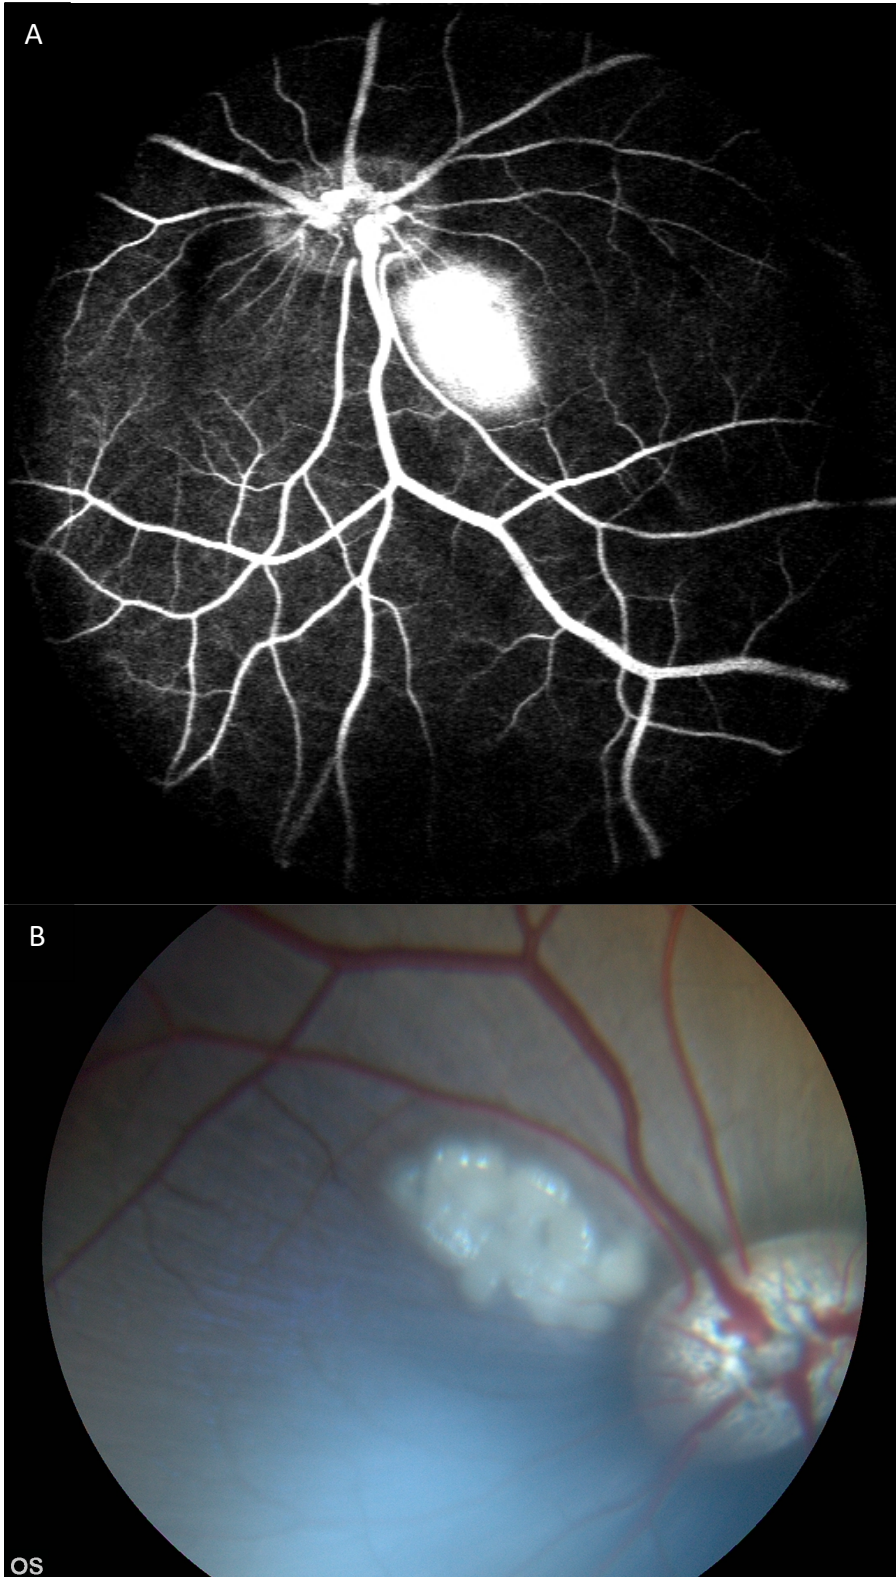

Supplementary figure 2: A) Fluorescein angiography from control eye showing sham laser spot and normal filling of the vessels. B) Fundus photo from control eye showing sham laser spot but no retinal artery occlusion.
