# Supplementary material for: Large-Scale Protein Analysis of Experimental Retinal Artery Occlusion
Source: Int J Mol Sci. 2023 Apr 27;24(9):7919. doi: 10.3390/ijms24097919 (PMC10177937; doi:10.3390/ijms24097919)
Supplement: Supplementary file 1 [file ijms-24-07919-s001.zip]

Archive with 12 entries (12 files):
- Figure S1, FA from all animals.pdf
- Figure S2, control eye.pdf
- Table S1, Mass spectrometry data filtered for unique peptides.txt
- Table S10, Protein names in key pathways.pdf
- Table S2, Mass spectrometry data filtered for 70 percent valid.txt
- Table S3, Data output from MaxQuant.txt
- Table S4, Significantly changed proteins day one.xlsx
- Table S5, Significantly changed proteins day three.xlsx
- Table S6, Significantly changed proteins day six.xlsx
- Table S7, Significant Reactome pathways, upregulated.xlsx
- Table S8, Significant Reactome pathways, downregulated.xlsx
- Table S9, Proteins not found in Reactome.xlsx
