# Supplementary material for: Large-Scale Protein Analysis of Experimental Retinal Artery Occlusion
Source: Int J Mol Sci. 2023 Apr 27;24(9):7919. doi: 10.3390/ijms24097919 (PMC10177937; doi:10.3390/ijms24097919)
Supplement: Supplementary file 1 [file ijms-24-07919-s001.zip › Table S1, Mass spectrometry data filtered for unique peptides.txt]

LFQ intensity 1d_1G1B1HO_1	LFQ intensity 1d_1G1B1HO_2	LFQ intensity 1d_1G1B1HO_3	LFQ intensity 1d_1G1B1HO_4	LFQ intensity 1d_2G1B1VK_1	LFQ intensity 1d_2G1B1VK_2	LFQ intensity 1d_2G1B1VK_3	LFQ intensity 1d_2G1B1VK_4	LFQ intensity 1d_3G2B2HO_1	LFQ intensity 1d_3G2B2HO_2	LFQ intensity 1d_3G2B2HO_3	LFQ intensity 1d_3G2B2HO_4	LFQ intensity 1d_4G2B2VK_1	LFQ intensity 1d_4G2B2VK_2	LFQ intensity 1d_4G2B2VK_3	LFQ intensity 1d_4G2B2VK_4	LFQ intensity 1d_5G3B3HO_1	LFQ intensity 1d_5G3B3HO_2	LFQ intensity 1d_5G3B3HO_3	LFQ intensity 1d_5G3B3HO_4	LFQ intensity 1d_6G3B3VK_1	LFQ intensity 1d_6G3B3VK_2	LFQ intensity 1d_6G3B3VK_3	LFQ intensity 1d_6G3B3VK_4	LFQ intensity 1d_7G4B4HO_1	LFQ intensity 1d_7G4B4HO_2	LFQ intensity 1d_7G4B4HO_3	LFQ intensity 1d_7G4B4HO_4	LFQ intensity 1d_8G4B4VK_1	LFQ intensity 1d_8G4B4VK_2	LFQ intensity 1d_8G4B4VK_3	LFQ intensity 1d_8G4B4VK_4	LFQ intensity 3d_1G1B1HO_1	LFQ intensity 3d_1G1B1HO_2	LFQ intensity 3d_1G1B1HO_3	LFQ intensity 3d_1G1B1HO_4	LFQ intensity 3d_2G1B1VK_1	LFQ intensity 3d_2G1B1VK_2	LFQ intensity 3d_2G1B1VK_3	LFQ intensity 3d_2G1B1VK_4	LFQ intensity 3d_3G2B2HO_1	LFQ intensity 3d_3G2B2HO_2	LFQ intensity 3d_3G2B2HO_3	LFQ intensity 3d_3G2B2HO_4	LFQ intensity 3d_4G2B2VK_1	LFQ intensity 3d_4G2B2VK_2	LFQ intensity 3d_4G2B2VK_3	LFQ intensity 3d_4G2B2VK_4	LFQ intensity 6d_1G2B2HO_1	LFQ intensity 6d_1G2B2HO_2
#!{Type}E	E	E	E	E	E	E	E	E	E	E	E	E	E	E	E	E	E	E	E	E	E	E	E	E	E	E	E	E	E	E	E	E	E	E	E	E	E	E	E	E	E	E	E	E	E	E	E	E	E
46893	227310	0	0	176310	219360	0	137430	0	0	0	0	0	0	0	1089900	0	1110500	0	308400	0	0	292150	4007500	0	0	0	105610	163610	616720	309460	108570	0	186150	0	0	221160	0	0	0	0	0	0	0	0	0	0	2647600	345230	0
0	687810	0	0	0	0	0	0	0	3328500	602750	11861000	8079700	0	0	0	0	0	0	0	0	0	0	0	0	0	3445600	3122800	0	0	2136800	4523200	6412700	5929900	0	0	0	0	0	0	4565300	0	0	5758300	4177500	0	0	5609100	0	0
7565800	3754700	5757100	13163000	8992900	13665000	5986400	0	9279900	9144100	0	6668100	3985900	8649600	11516000	8811100	9075500	8526100	1589600	8787700	6875700	4591900	8817500	5523100	5310700	0	5978400	8646700	6947800	9716100	8642800	6401700	7334900	9320400	11654000	4606300	7535300	11102000	6978000	15669000	9882800	9630500	8496100	13099000	3362500	13421000	0	12396000	8444300	9068700
5232600	0	4273100	0	12925000	0	13043000	0	0	8981900	9317900	0	11145000	0	8100500	7684700	0	0	7197700	0	0	0	0	9197400	0	0	0	0	11816000	0	0	0	12536000	9171900	0	0	11472000	7083500	0	14442000	7621900	0	0	0	0	0	0	0	0	8444400
18729000	0	0	19294000	10580000	0	16519000	11363000	14879000	0	22037000	20983000	14554000	17636000	0	29890000	13443000	30343000	0	16050000	10229000	13710000	0	21121000	15278000	0	19225000	14000000	0	0	14439000	0	0	16601000	0	0	13939000	0	0	0	12388000	0	0	19979000	11216000	15473000	0	29351000	0	0
0	68560000	49398000	37296000	35407000	25798000	26999000	24355000	24222000	70650000	24676000	34672000	54810000	45871000	35431000	34398000	0	32817000	26686000	20713000	0	37288000	33793000	34910000	0	31550000	38375000	38520000	23019000	30724000	20396000	30284000	0	0	23409000	22898000	0	32612000	20234000	23226000	0	22156000	25297000	26916000	0	40294000	32068000	32518000	28829000	24760000
0	0	964230	1621100	0	0	0	1168400	0	0	0	0	0	0	0	0	0	0	1571100	0	0	0	0	0	0	0	0	0	0	0	923550	0	0	0	0	1344800	0	0	0	0	0	0	0	0	0	0	0	0	0	0
12109000	22422000	19017000	0	9632300	20369000	18858000	14285000	11640000	23533000	17456000	19610000	9641200	16014000	18311000	17869000	11337000	18503000	0	14425000	14998000	16934000	18909000	0	13082000	23959000	0	14154000	22869000	20703000	18296000	7874600	17441000	33533000	16708000	0	14321000	19532000	24534000	42486000	12741000	19913000	15469000	21511000	16892000	21330000	24629000	41750000	19233000	23203000
43745000	53801000	41775000	43393000	43254000	62576000	37109000	39883000	48117000	81970000	37530000	47543000	42017000	66938000	45453000	58938000	52631000	39761000	53502000	39501000	53533000	50709000	44395000	45886000	53362000	97829000	49626000	46935000	60050000	56023000	36733000	52289000	45941000	79651000	51130000	39002000	63818000	51921000	33180000	45958000	63313000	53518000	38582000	40443000	45311000	60672000	41670000	49713000	71185000	63175000
14065000	24312000	25349000	25284000	19377000	18748000	21253000	35606000	15371000	19930000	37946000	32794000	17792000	13038000	31736000	20017000	20085000	19526000	48349000	36117000	19017000	21476000	26204000	33903000	20550000	23329000	24692000	29661000	19847000	21571000	24416000	27285000	13929000	15623000	23501000	39665000	14330000	13793000	20928000	28226000	15471000	17248000	27953000	46867000	17916000	15890000	27939000	26087000	9225100	18637000
4136000	8504000	10190000	7872200	3964400	13306000	8080400	13551000	10483000	16259000	14009000	6538000	3523500	5882700	0	6193800	2964600	4874800	13551000	7888200	4477900	3756400	4774300	10693000	3409200	7287800	7819200	15501000	4949000	8277000	9840900	6681600	3080100	4515900	6102100	10027000	2381700	7405300	7932500	12899000	8224500	7014900	8070900	11760000	4269300	7215100	0	6234800	4429800	6223700
0	0	0	0	0	0	0	0	0	0	0	0	0	4268200	0	0	2925500	0	0	0	0	0	0	0	2229000	0	0	0	2129300	0	0	0	4018500	2619900	0	0	0	1511100	0	0	0	2034700	0	0	3828600	0	0	0	8844900	0
7362700	7328600	0	3153200	6781500	9553400	0	5402500	8147800	0	9739200	2045200	7953800	4199900	0	4506400	18555000	5728000	0	1907000	3422400	7365800	5082000	0	5290500	3192400	0	4879700	2925800	5234500	3347300	2343100	10606000	2512700	0	0	7428000	7692600	0	8404900	6700000	5150100	4882000	4545200	5724900	7486400	4961900	7102500	10684000	8047600
0	0	0	0	0	7833800	0	0	0	5543800	6635900	0	0	0	0	0	0	4865000	2626400	0	0	5808400	0	0	0	0	0	8752200	0	0	5814300	7028800	0	0	0	0	0	0	0	5528400	0	0	0	0	0	0	0	0	0	8877000
3561000	2366900	0	0	1816700	2801300	0	0	3316700	0	2942600	2009200	4433300	2497000	0	0	5789700	3096900	0	0	17294000	3075900	1986900	2930700	3498500	4615200	3425100	2494700	4210400	2704900	1642600	0	2947200	2280100	1996700	0	5721000	0	9581200	0	4949200	5193300	2290700	0	3318700	2278900	0	0	4315900	3365900
0	0	0	4029200	0	0	6156400	0	0	0	0	0	0	0	3701400	0	0	0	0	0	0	0	5982300	15341000	0	0	10487000	3796800	0	0	10723000	2317300	0	0	0	3718400	0	0	2089400	0	0	0	0	0	0	0	0	0	0	0
0	1530400	0	0	0	1682700	0	0	0	0	0	0	1037500	0	2696300	0	0	0	1177800	0	0	0	0	0	0	1119500	0	0	0	0	901740	0	0	1668200	0	1412300	0	0	0	0	0	0	2078200	0	0	0	0	960840	0	0
13840000	13205000	11432000	15001000	16744000	21489000	12793000	13196000	10571000	10618000	12761000	8997500	14120000	14271000	14946000	18840000	16828000	13862000	10640000	13765000	18012000	10865000	27739000	11423000	12401000	13109000	13565000	11847000	13281000	10668000	13571000	15074000	20893000	11917000	11127000	9094600	24408000	21160000	15886000	16320000	18049000	8500900	9962800	7297300	8481000	16152000	10345000	12579000	13343000	9111700
9447700	8528400	6945400	5548900	9729000	5065200	9129800	14991000	5557300	4653800	4891000	0	7382900	6831700	6031700	6272800	10106000	6212300	4641100	9203000	13019000	4636300	6532800	6913500	8284900	14233000	4960200	14173000	7420800	10314000	8944500	7295000	17063000	12530000	11120000	2609700	13036000	10346000	0	5816700	14886000	10495000	15447000	7077500	6936000	6463200	9939500	3451900	15900000	20163000
127570000	138180000	153450000	122520000	109490000	146010000	151270000	165130000	115530000	129750000	128050000	161330000	162780000	161120000	146440000	153350000	159790000	151190000	175090000	140350000	140630000	157770000	147980000	124790000	131140000	164510000	154100000	122760000	173230000	145190000	136070000	139170000	133090000	145110000	126390000	137830000	148120000	158220000	158280000	147820000	116050000	110620000	138050000	152970000	153570000	128950000	133750000	177690000	118490000	124350000
4685000	4504500	0	4679700	4038800	6313700	3007900	3305700	5148500	4088500	6190500	7778400	4371600	7618600	3614600	4284400	4559800	6061000	8336400	4523000	4320300	3534400	4333200	3631000	2923500	4049500	3763600	2388500	6450900	4477100	3760500	3343500	7939600	3067100	4526900	2875400	4336300	6503500	4943500	5671600	2959800	3107000	3995100	0	0	10097000	6067100	4239900	3869200	2658200
49722000	43461000	37344000	38724000	42936000	51737000	42976000	33655000	40312000	35170000	43571000	39798000	48553000	54845000	47989000	35441000	38440000	39873000	45106000	36158000	38414000	40940000	42697000	39259000	50277000	33705000	37826000	38672000	44010000	36369000	39328000	34498000	46751000	32479000	34727000	35310000	39971000	45762000	37468000	36117000	54910000	37224000	51770000	48768000	43564000	47027000	34345000	34199000	48312000	26614000
0	14758000	12679000	14628000	12668000	12915000	17388000	17385000	6980300	32386000	17623000	10584000	13650000	10461000	20850000	12491000	10790000	5277200	21370000	13157000	0	13072000	18654000	19750000	21623000	15562000	17652000	16211000	14592000	0	12227000	16830000	20226000	24028000	8857900	20759000	14239000	11488000	22681000	21383000	14328000	10048000	31183000	14314000	0	16037000	9504300	7956400	16324000	0
89394000	62650000	95444000	119840000	120780000	126550000	91750000	104250000	111380000	99270000	114230000	144050000	83818000	95150000	142640000	105390000	91952000	75784000	113690000	104580000	100090000	118740000	89944000	104300000	75086000	75773000	106440000	114500000	108360000	118710000	123750000	113290000	98069000	75040000	109560000	123090000	102380000	88026000	104610000	93657000	78600000	77664000	119670000	118610000	87254000	102330000	107080000	148780000	44322000	83365000
220880000	178250000	187650000	201560000	197100000	212930000	150410000	185030000	200640000	175260000	177000000	232780000	199310000	159840000	135550000	156300000	229260000	171830000	151710000	150590000	251270000	205120000	150550000	196130000	184840000	131740000	160770000	214390000	214980000	166590000	203210000	180610000	205590000	178750000	179890000	211450000	240660000	189140000	180600000	166810000	214850000	136600000	148690000	137050000	233530000	156610000	140030000	181940000	163590000	142760000
8330000	0	0	6580300	9958600	7060200	8369200	8095300	7381000	11842000	8715400	7408300	0	4259600	9701400	7079900	9318500	0	8961400	10588000	8746200	4986000	14976000	7400300	8882400	5709900	6666000	6982900	5627700	5726000	7419800	6948200	8717700	7673900	4986100	0	10998000	5979300	3767800	6998800	8474300	5000900	5822500	7901000	11885000	0	0	9525500	6124700	5396800
7866600	9986700	5111000	10429000	9118000	14478000	7790000	14144000	4588000	9518700	10041000	7031600	8474700	12454000	16555000	7992300	4877800	10872000	8403400	8332300	9332600	9206000	0	8403400	10093000	4156400	6547400	6675500	6648800	17968000	7755100	10454000	11012000	12517000	14703000	0	10045000	6862900	3521100	2136400	24472000	13736000	4782200	10455000	14136000	8040400	7595200	5819600	15893000	6138300
61810000	74205000	57736000	61563000	43403000	64589000	43633000	61715000	59271000	62046000	45362000	40445000	43891000	57890000	49108000	56406000	44677000	55528000	89779000	53601000	53330000	124800000	46519000	61752000	49330000	56216000	51167000	50347000	42117000	72719000	59950000	45259000	47690000	57626000	47747000	42246000	29132000	48471000	44267000	48648000	65067000	67327000	41307000	44171000	49453000	71009000	46803000	34316000	67044000	64813000
28201000	18181000	25142000	27806000	19773000	19786000	29680000	32630000	23185000	36831000	24823000	34083000	18623000	18140000	18292000	29422000	25992000	15611000	38933000	20684000	23550000	19136000	22055000	33259000	25511000	17686000	0	28732000	24204000	26323000	32624000	28618000	16797000	24017000	28345000	31236000	31615000	32973000	28917000	32769000	17035000	25899000	19228000	15203000	26740000	20436000	17970000	64434000	23240000	29659000
0	0	0	6017700	0	0	0	0	4026600	0	0	0	0	0	0	0	10940000	0	7322900	0	0	18651000	8065700	0	0	6980900	9305000	0	15984000	0	7842700	7876600	3440600	9964600	9755900	0	3353800	0	0	8735000	0	0	11484000	6118300	3203700	0	0	0	0	0
17861000	8620100	10970000	14769000	11522000	7505400	14650000	20683000	7847200	19239000	13893000	0	13437000	9151100	20869000	10963000	10605000	5657500	9973600	11857000	11560000	11220000	8292000	9611200	10488000	14751000	9589400	8911900	16604000	12722000	10080000	8676100	17496000	16459000	15246000	11377000	10391000	11217000	7962000	9979900	12649000	15286000	13654000	14122000	9248100	13748000	8644800	12364000	6268300	9456100
6881100	5930600	6060800	5813000	9957300	6575000	13291000	6588200	7357200	6168900	5799100	6729000	8610300	7691800	7428700	10758000	5114600	6497300	11243000	8836300	8004700	6711000	8951300	8206600	7376800	5815500	10645000	8301100	8484400	5934000	6304700	6588800	12692000	7468400	5162600	5043400	5774500	6811800	7578800	8286600	10382000	7426600	5181300	5861500	10179000	7268100	7713500	14859000	4910100	7088600
9691100	10320000	6357900	7466700	11532000	8702300	7165300	6055600	8039700	4126700	18105000	11577000	3935400	0	23825000	9425300	5893600	4031700	7676500	7484000	5564200	8858300	10537000	8054400	4778000	6797000	5587300	12131000	11725000	9362200	10092000	8008900	7879900	4778000	6637400	5786900	8283700	10155000	9470100	0	6318700	5116300	6420500	4013900	5165500	17044000	9338800	9878000	5239000	3406000
7357700	5230800	3923300	5610700	9703300	2669700	5446500	2709000	9994100	2816600	0	13441000	10656000	3415000	4441900	6872200	4054700	2839200	2920500	7782600	9023100	9522500	3192200	3550100	6340100	9464700	4830200	2955500	6829500	7109600	4922000	3147700	6572100	5689400	5261000	5354200	4851700	4624600	9033400	3918000	8245600	6058900	10232000	2297300	6154300	6053200	4710300	6899400	15667000	6629200
3250800	0	2154700	0	0	0	0	0	2396600	0	0	0	0	0	0	0	0	1506100	0	0	0	0	0	0	0	0	3732000	4607900	0	0	1984400	0	4162600	2153200	0	0	0	0	0	0	0	0	0	0	0	0	0	3918400	2765000	0
1734300	0	0	0	1485800	0	0	0	0	0	0	0	2635600	0	0	0	1693700	0	0	0	0	0	0	0	0	0	0	0	0	0	0	0	0	0	0	0	982650	1538800	0	0	1524500	0	0	0	1365400	0	0	0	1664200	0
32965000	20494000	27287000	19424000	25803000	0	30073000	30737000	42560000	48739000	33820000	25562000	26440000	36405000	0	27163000	29229000	7457800	52502000	27272000	23365000	25267000	21263000	26623000	41288000	31750000	18627000	31104000	22944000	12856000	30940000	25719000	20295000	29147000	0	21990000	20890000	16162000	33157000	35300000	34037000	30091000	26314000	32329000	21098000	17415000	37094000	34358000	21975000	30787000
3135700	5142600	0	0	2857600	1286200	0	0	0	1484200	0	0	1889500	0	0	0	0	216440	0	0	0	14901000	0	0	0	0	0	0	3805300	638900	0	1242600	8204800	4982800	6928500	4471800	5873700	3840700	2039800	0	0	1928200	0	0	0	0	0	0	17357000	3179000
61699000	57233000	52965000	53089000	69048000	51846000	65327000	67056000	56123000	65893000	54100000	38423000	78031000	52266000	92334000	56441000	58544000	50361000	69721000	59546000	75826000	69681000	72262000	58738000	60398000	54734000	57677000	72488000	59042000	57914000	46233000	65110000	67876000	62846000	55495000	58482000	67150000	53392000	60919000	63101000	69658000	66518000	66833000	57149000	43750000	52200000	57662000	58122000	64268000	83682000
0	6556900	5591100	6597800	7940200	8083600	4304800	15800000	12327000	5589800	7909600	4974800	5940300	6145600	6446800	8667900	7279600	6868600	0	5255800	14451000	11335000	13300000	6327800	4869400	6120900	4572500	5748100	11531000	7971700	4656200	6084300	12377000	11058000	9947100	6028700	13109000	10796000	5575200	10493000	0	6508100	0	3942700	7946700	8941300	6337300	0	0	4124000
0	0	0	0	0	0	0	0	0	0	0	0	2298600	0	0	0	0	0	0	0	0	0	0	0	3207300	0	965200	0	0	2061600	0	0	1251800	0	0	0	0	0	0	0	1732300	1142100	0	0	1061000	0	0	0	0	0
0	21932000	48026000	38968000	36338000	43619000	31506000	27973000	31890000	35325000	22501000	24047000	32806000	42807000	36336000	32694000	28005000	26694000	32537000	44304000	29397000	31882000	43333000	35663000	34203000	32141000	52075000	36891000	20138000	22852000	34515000	43251000	27308000	35518000	27117000	16164000	27853000	0	0	15974000	33418000	46056000	26585000	22407000	52599000	24079000	26047000	24850000	10693000	23326000
0	1787500	2383700	0	3686400	1863300	2149400	0	2763800	1969300	4513700	0	3252500	1953000	1654200	0	2808100	1744700	3512700	0	6237100	2573100	0	0	1578200	1526300	3523600	1816000	3855900	0	1402800	2219200	0	3844000	1999000	0	0	1734400	1884600	1902300	0	1790900	1930600	0	0	3310600	0	2463100	4234700	1987200
707010	0	0	0	0	0	0	1393600	524670	0	0	0	0	1388000	0	0	0	0	0	1152200	742610	0	0	0	761050	509580	0	0	628470	0	0	0	0	1636800	0	0	969320	1951100	0	0	0	732360	0	0	1048800	1263800	0	0	547290	0
0	1225500	4555800	0	35167000	0	0	3641600	1952600	0	4984500	10194000	0	0	0	0	0	0	0	3604200	0	0	0	0	0	0	0	0	0	0	0	0	2191900	0	0	0	0	0	0	0	0	0	0	0	1925900	0	0	0	0	0
0	0	0	0	0	0	0	0	0	576990	824730	0	0	0	0	0	0	0	0	0	0	0	0	1573400	0	0	0	0	0	0	0	0	2574100	0	0	0	0	0	0	0	2356800	0	0	0	2015000	0	0	0	0	0
49013000	48534000	40992000	38263000	41390000	35412000	45395000	38665000	32022000	37451000	52633000	47048000	47317000	40355000	49632000	53401000	55160000	35490000	42296000	40444000	51549000	38294000	35770000	48492000	41248000	43371000	40196000	45953000	44515000	29125000	38349000	38249000	54222000	49212000	42507000	46522000	54278000	44794000	34355000	37783000	58311000	58311000	51121000	40108000	43727000	54241000	55046000	44725000	49777000	83834000
13197000	13824000	13355000	13037000	9592100	13165000	10212000	14488000	13553000	15785000	18576000	17313000	16759000	19212000	17928000	12965000	7826800	23028000	14709000	20175000	15688000	19559000	13277000	17942000	10884000	7123300	11219000	0	11180000	39327000	10426000	12004000	18718000	21318000	15636000	8479800	14170000	11228000	11652000	20136000	15415000	20307000	14290000	15934000	15781000	13184000	24277000	9095700	14388000	12996000
0	0	3146000	4207900	0	3179200	2811600	4559100	0	0	3824300	0	0	3565200	0	6126900	0	0	2333600	6569500	0	4319400	4976000	6258200	4295700	3505600	6949400	4739700	5149000	0	3595500	0	0	4517000	2902200	8462700	0	0	5140400	4150500	0	0	2631600	0	0	4796500	6503500	6083900	0	0
4621900	0	0	4150600	2738900	5628200	3745300	0	0	0	4450700	3094400	4609200	5550900	3551200	0	4871900	0	0	0	0	0	4034000	0	5143500	0	4841200	2964300	0	0	4830500	0	4360100	0	0	2722300	3126300	0	0	0	7277500	0	6204800	5729900	5409400	0	0	0	0	0
0	0	0	0	0	0	0	0	0	0	0	0	0	0	0	0	0	0	0	0	0	0	0	0	3947400	0	0	0	0	0	0	0	0	0	0	0	0	0	0	0	0	0	0	0	0	0	0	0	2377400	0
49377000	51504000	28497000	34400000	50874000	48849000	38916000	30852000	43104000	41719000	33753000	34572000	44737000	44490000	40671000	33621000	42473000	32432000	36102000	43241000	34625000	43661000	40283000	30875000	42643000	30164000	41642000	41257000	50790000	40571000	37923000	42674000	42811000	47261000	44555000	51640000	34817000	34495000	36296000	40239000	45226000	42859000	36398000	33285000	46831000	46659000	33273000	37142000	40944000	45366000
20246000	14032000	5190800	8007500	3853900	3560500	7880300	5433400	6724300	7556500	8901900	6144600	18007000	8427600	6195700	10776000	9697200	7799900	10377000	5314400	0	6202100	4840100	7483100	8424500	0	9179300	4686100	6975600	5399200	5385100	8482900	15280000	6704800	11368000	8168200	22220000	4450800	5313700	4275000	7354500	6806000	10480000	6245300	8232400	5969500	11093000	8616800	8677500	0
0	0	0	0	0	0	0	0	0	0	0	0	0	12221000	0	0	0	9256300	0	0	0	0	0	0	0	0	0	0	0	0	0	0	0	0	0	0	0	0	0	0	0	0	0	0	1709600	0	0	0	0	8179600
45404000	17748000	24664000	23411000	35363000	23042000	22503000	0	19652000	42382000	35705000	26328000	34842000	24865000	23692000	33631000	21375000	21335000	22003000	0	21564000	25608000	33204000	0	38938000	25944000	29414000	34263000	28103000	38073000	25746000	0	20357000	29119000	21808000	24917000	18986000	16039000	17994000	0	20280000	21397000	21925000	25014000	12426000	8468800	8044700	18628000	14077000	25516000
28739000	38239000	34613000	33116000	38781000	40362000	34635000	40326000	38666000	43989000	47618000	45893000	40216000	55875000	49297000	59540000	51738000	46628000	51768000	45602000	47086000	32398000	60500000	49081000	31072000	26294000	30301000	39135000	35025000	26350000	24351000	29915000	26493000	26445000	26981000	23125000	25069000	38941000	35530000	15700000	27303000	28718000	27624000	0	30131000	23915000	36256000	24863000	26808000	30841000
0	0	0	0	0	0	0	0	0	0	0	0	0	907990	0	0	0	786190	0	0	0	0	0	0	0	1051100	0	0	0	0	0	2030100	0	0	0	0	0	0	0	0	0	802540	0	3235200	0	0	0	0	0	0
42740000	38275000	45634000	57778000	50627000	56332000	40194000	43047000	54544000	68897000	64013000	45929000	47392000	52790000	44822000	41640000	32644000	56553000	50355000	47054000	50160000	47025000	53533000	54231000	56462000	45600000	53856000	49201000	50814000	64239000	48342000	54363000	41683000	55341000	39385000	40425000	47724000	42390000	43252000	39833000	49541000	43344000	45649000	42067000	53494000	45191000	44614000	42025000	38557000	55071000
238230000	235050000	250640000	250580000	291609984	271340000	269190016	237270000	242230000	290180000	227670000	216370000	235310000	229530000	275809984	302360000	258890000	293780000	190350000	252650000	265580000	243210000	276440000	308350016	342560000	250780000	242950000	235710000	290190016	249430000	256890000	224460000	272409984	268470016	251150000	214190000	253020000	230000000	279480000	251810000	235490000	239250000	198480000	232370000	250480000	247780000	206670000	325830016	307790016	264190000
61782000	63413000	72216000	92252000	62235000	74124000	76940000	68532000	58765000	69771000	55746000	65668000	74964000	84384000	85326000	83522000	67082000	74234000	72647000	83043000	63996000	98629000	75288000	86962000	87131000	71289000	82450000	70202000	73317000	96369000	83642000	67718000	55661000	61591000	51819000	61432000	65639000	82460000	66164000	53871000	90087000	77540000	85882000	73099000	62470000	48354000	108530000	70242000	70552000	55765000
3131700	3523100	2165800	3766900	5161400	0	0	1449100	2169400	2126700	1275300	1578800	1897400	1821500	2416300	4095100	0	2390300	2837700	1707300	0	3639200	0	2524100	0	3381600	3494600	4059100	1546600	7322600	2457500	2636700	0	3802400	2524700	0	0	6109500	0	2244800	3198400	3122800	2184900	2824900	3920300	0	2394900	2106600	3544000	1737600
25256000	28310000	24052000	16316000	22241000	28375000	26803000	26361000	35192000	24283000	25809000	22224000	29499000	27295000	30844000	35851000	28072000	36156000	32452000	32024000	20626000	36685000	22600000	24824000	21875000	32148000	29275000	23726000	25025000	29625000	19856000	24539000	26179000	23780000	43860000	38342000	21573000	33894000	23964000	11395000	19970000	23986000	21419000	17757000	11483000	30556000	30332000	24566000	20886000	611020
0	0	0	0	0	0	0	0	0	0	0	0	0	0	0	0	0	0	0	0	0	0	0	0	0	0	0	1184000	0	0	0	1210600	1337700	0	0	0	0	0	0	0	0	0	0	1360300	0	0	0	0	0	0
172060000	195190000	183550000	161540000	184020000	184480000	185410000	177310000	153360000	129430000	160380000	167800000	216370000	199510000	200850000	192360000	188240000	161920000	165060000	161730000	192020000	203030000	179880000	159150000	189170000	170410000	178900000	161520000	205030000	186040000	197790000	190100000	151590000	186730000	166440000	112030000	194480000	200240000	182590000	192470000	163210000	167300000	172890000	190060000	193450000	208200000	191600000	175910000	174570000	188070000
1759300	906210	0	1431700	0	1310300	3384000	0	0	1283700	5905000	883010	1547700	0	0	1010700	2996500	0	0	1810700	0	0	0	1439100	0	0	1075500	1284600	1991000	2027000	1972400	0	1889600	1677300	1104000	2699000	1169700	0	878810	0	0	0	0	0	1088300	0	1665400	0	0	2445400
0	0	0	0	766870	0	0	0	737990	0	0	0	0	0	0	1061000	618780	0	879820	0	394950	0	0	0	0	0	0	503890	589560	0	0	0	0	0	0	0	0	899590	0	0	0	0	524570	0	0	0	0	0	0	0
0	1930200	0	0	2931400	2579100	0	0	1792900	2408900	0	2896900	2117400	2897800	0	3145700	2451800	2750100	0	0	2395700	2423400	0	3604700	3777600	0	0	0	5131200	0	0	2734700	2393300	3793300	0	0	2083800	4713100	0	0	0	2014900	2703400	0	0	0	2184200	0	2507800	3243900
0	0	0	0	8908300	0	0	0	0	0	0	0	0	0	0	1659800	0	0	0	0	0	2929200	0	0	0	0	0	1498000	0	0	750490	0	0	0	0	0	0	0	0	0	0	0	0	0	0	0	0	0	0	0
12982000	19357000	15517000	19620000	22823000	18834000	17494000	16289000	8877900	16028000	17632000	15974000	18237000	25189000	16085000	21684000	16397000	29530000	19413000	17938000	17551000	23186000	16707000	19865000	18562000	23445000	18995000	17815000	24871000	28763000	23216000	19643000	16254000	25552000	17675000	12459000	37700000	19803000	16510000	20070000	5001900	24258000	16265000	15090000	19385000	28647000	21576000	14909000	14088000	15630000
98943000	92936000	97347000	91053000	99939000	105570000	92790000	109110000	66730000	67302000	66200000	81817000	87146000	102110000	81121000	92945000	89899000	101320000	127840000	93962000	105770000	74065000	64012000	68527000	106560000	65183000	86580000	70494000	93150000	89451000	99314000	101110000	109800000	72263000	98887000	79282000	74474000	78105000	83660000	87572000	80046000	66973000	73562000	71651000	86806000	89170000	92992000	73586000	74124000	79473000
5228500	0	0	0	0	6266400	0	8403800	0	5586100	0	0	6707200	8631000	0	0	11402000	8002000	6429300	7395800	7672200	8909400	7007500	5950500	8150400	21885000	6602100	4180400	8443000	0	4359200	5316400	8947900	0	0	0	6937700	0	0	0	5382500	6268200	0	0	5701100	5584100	8751500	0	5225000	0
0	0	3214300	1508300	0	3073000	0	1475200	0	1941200	1709400	1944500	0	0	1978100	2674800	0	0	2683600	2133600	0	0	1908900	6755000	0	4190500	2506000	2267200	2223000	2642800	1882900	1346400	0	2987500	3659700	3829800	0	0	0	2399500	2206600	0	5443900	0	0	0	0	0	0	0
0	0	2215100	1737700	0	0	2728500	4173200	0	1284000	1928000	0	14257000	0	1487500	1709900	0	0	0	3431800	0	0	2421600	2442500	2159400	2084600	1659400	3002600	3428400	2113700	1646900	2727400	0	0	3215100	0	2199900	0	2290700	1863500	0	0	3063500	0	0	0	1702200	2738200	0	4336300
3313200	0	0	0	3850200	0	0	0	3355100	0	0	0	4740800	4936200	0	0	0	0	0	0	5207200	0	0	0	3501000	0	0	0	3985800	0	0	0	0	0	0	0	0	5048400	0	0	3390000	0	0	0	0	0	0	0	2695000	0
0	0	0	0	0	0	0	0	0	0	6383500	0	0	9722000	0	5788300	0	0	2582000	5156200	0	0	0	0	2849800	0	6478500	7888100	3724000	0	7319600	4060400	0	0	4224300	0	5758700	2852400	0	0	7820000	0	7602100	0	7240200	0	0	0	0	4013400
3321600	3355900	3732000	7710500	5666700	3355900	4642600	5695200	4508400	7818400	3920400	0	5190700	6565500	4907800	0	6065300	3716100	4497500	5840500	4974800	5236100	6930700	0	9154200	5126200	3896100	9784800	4766000	5926200	4481800	6760200	6286600	6870900	4990600	0	3245100	3067700	4630400	0	4646500	5621600	8863900	0	5872500	3362900	5060200	0	5242600	7940600
11772000	9264400	9778400	8160600	7613000	13696000	6623800	10133000	13324000	7448500	9280500	10956000	9377100	10160000	10929000	8285500	11568000	10038000	3671400	13286000	8442700	14933000	11496000	9060900	18361000	12219000	8085600	7733400	7996000	6114600	7677900	9774100	9949400	13328000	12747000	10124000	12136000	20280000	11466000	15433000	15439000	0	8719900	9847500	11680000	6930600	13330000	8926000	16929000	10901000
21025000	10891000	16642000	19079000	17451000	12541000	11232000	14151000	14829000	11733000	10849000	16035000	15002000	8584800	12927000	16094000	13747000	10457000	16608000	15517000	14258000	11676000	13063000	11159000	15573000	11030000	18750000	15089000	11546000	9039600	14036000	21319000	11826000	7947600	11591000	11388000	11749000	12229000	13638000	15048000	20801000	12937000	13142000	18479000	11193000	10361000	19815000	16351000	11816000	11255000
0	0	0	0	0	0	0	0	0	0	0	0	0	0	0	1134100	0	0	0	0	0	0	0	0	0	0	0	0	0	963600	0	0	0	0	0	0	0	0	0	0	0	0	0	0	0	0	0	0	0	5636500
2693300	0	4267600	0	3378500	1848400	0	1836900	3319300	7552300	4494400	1966800	4954400	796620	1892200	1283000	1678000	6733300	4084100	1102900	2504200	666900	0	1411000	0	4738800	2294500	1814100	4949000	0	2376900	0	3144400	4319900	6639000	1579000	4667400	2917000	1472500	0	3168600	1523600	0	0	2718300	3548000	2404200	0	2373800	0
116360000	131200000	109010000	116810000	113760000	148510000	112810000	108190000	138720000	106050000	112970000	120510000	105380000	120300000	101030000	105670000	123650000	134620000	106060000	92295000	119690000	126280000	113370000	89961000	139760000	108550000	113390000	103780000	110950000	95567000	99635000	110910000	119700000	121340000	112460000	99745000	107310000	127370000	101400000	90653000	116780000	131270000	122200000	91401000	102580000	143840000	114380000	100960000	125410000	135420000
30346000	49524000	51665000	33634000	29221000	34657000	33420000	32633000	28606000	41171000	48594000	53432000	28903000	47280000	24396000	47085000	53378000	38327000	22945000	30439000	32349000	41322000	42058000	43155000	34880000	53013000	25176000	8172000	49069000	52921000	39415000	38762000	46382000	40944000	31052000	43937000	25371000	0	43773000	27740000	34641000	62838000	48175000	0	34836000	40920000	18801000	34506000	66201000	36126000
0	0	0	0	0	0	4301500	2632700	2639800	3103100	0	0	4367200	0	2814800	1851600	0	3141300	3004100	0	0	0	2208300	2008200	0	2197000	0	2059100	2862100	0	0	2484500	0	0	2990400	4602000	0	0	0	0	0	0	0	0	0	0	3560600	0	0	0
8283200	10425000	9434300	5588100	11360000	9105200	0	5740000	9203100	0	0	6415100	7417300	10849000	0	8175000	8467700	8708900	5895700	0	11506000	8360400	4556300	0	10401000	14046000	7353200	7756500	8241300	11185000	5151500	5749200	8325400	9090800	8631200	10055000	12580000	8795000	7483300	0	15271000	10887000	0	2371800	8458000	8243800	7144500	0	19389000	13217000
0	4327100	3059500	0	2649900	2216600	0	5498700	4367900	3625000	0	0	2917700	3802000	0	0	3746300	2740100	0	0	3500100	6576400	0	0	1354800	2887900	0	5081100	0	4719100	4297500	3678100	3730100	3414700	2599700	0	2691000	4554800	3770700	0	2484700	6173600	0	0	3402300	4277200	7277000	0	5182900	3340500
50064000	52583000	62406000	41129000	43632000	47915000	39099000	41515000	57351000	54301000	44101000	41851000	56257000	37977000	55085000	49771000	41751000	49612000	41052000	50075000	48174000	40728000	53716000	44271000	38380000	42185000	47658000	38999000	35422000	51107000	43098000	39920000	69764000	66210000	73611000	53033000	68769000	57264000	60208000	51851000	71833000	56637000	81614000	64478000	54024000	50599000	52211000	51504000	115180000	85543000
16022000	12607000	21967000	23339000	25309000	17316000	20542000	22006000	5850700	26931000	14437000	22035000	21951000	11366000	25191000	15677000	28404000	15873000	26360000	18236000	13224000	17117000	25029000	19487000	13348000	12900000	16637000	22396000	15785000	17927000	24828000	16702000	21982000	16979000	19513000	28791000	11009000	14127000	35269000	16075000	14247000	12057000	27461000	25569000	21543000	15855000	23510000	5870700	13549000	17370000
26564000	27920000	27619000	22966000	21872000	31830000	27604000	28200000	26066000	31190000	24486000	40359000	24168000	29198000	21403000	0	30397000	27644000	31355000	27506000	23252000	22718000	25780000	40804000	30990000	29474000	21792000	36496000	26083000	36648000	38043000	31604000	18907000	34268000	25475000	24774000	20733000	26241000	21423000	19384000	29589000	23770000	24360000	27508000	33710000	22169000	23150000	25946000	14308000	18946000
9475600	8342200	0	0	6306200	10026000	0	10120000	10315000	8546900	0	0	7107400	10616000	0	5878600	0	9093400	13664000	9071100	9138400	10135000	0	5959700	10514000	8681400	0	7500400	11622000	0	6880800	7754000	12814000	9028500	0	0	9955000	0	0	0	9936800	7289800	0	6720400	9021900	18017000	0	0	10310000	10292000
0	0	0	4108800	7412400	0	0	7910200	0	5469100	0	0	5933700	0	0	6429900	6669200	0	0	6408000	3892700	0	0	7840100	0	0	0	0	0	0	0	0	0	0	0	0	0	0	0	0	0	0	0	0	0	0	0	0	0	0
105200000	140000000	131090000	132290000	112680000	138950000	123210000	127780000	154880000	146180000	131550000	156020000	99843000	102080000	124050000	125810000	110440000	134600000	112600000	125350000	120150000	138290000	130250000	157520000	140210000	172770000	160650000	157810000	120500000	129240000	148480000	151380000	150920000	146830000	143730000	154750000	117210000	113760000	99105000	110890000	125480000	153870000	159070000	126880000	117230000	120380000	118690000	159950000	184040000	154690000
0	0	1887200	0	0	0	2214100	1171500	0	0	0	0	968350	0	0	1470100	0	584260	2284200	1907300	1132100	1286200	3735000	1086200	0	0	1522200	1441900	0	0	884840	1461300	0	0	0	0	0	0	0	0	2024300	0	0	0	1316500	2780100	1336100	0	0	0
4567400	0	0	0	2900100	0	0	0	3896700	0	0	0	3572500	0	0	0	0	0	0	0	5166700	0	0	0	0	0	0	0	0	0	0	0	4362700	0	0	0	4571200	0	0	0	4376200	0	0	0	4253500	0	0	0	13478000	0
153750000	138440000	157510000	162010000	153530000	172850000	199670000	174350000	147950000	153390000	173690000	158550000	201420000	194030000	184300000	182160000	167490000	180630000	134210000	185730000	168270000	159390000	194860000	178900000	160930000	167660000	210620000	171040000	167430000	148380000	175460000	179220000	118300000	145430000	164000000	183420000	142540000	149820000	137670000	161990000	152360000	166940000	159240000	160730000	177450000	168590000	188990000	155000000	128510000	125660000
31836000	31690000	24300000	29596000	21977000	22497000	28753000	33546000	17165000	18507000	30479000	19693000	29712000	22393000	29250000	27844000	39121000	26788000	26361000	28918000	19354000	22074000	20427000	38911000	35679000	38541000	31721000	35838000	39740000	20487000	26401000	37089000	22866000	33945000	36793000	33076000	30877000	29317000	22812000	20032000	24405000	36351000	28021000	41201000	32951000	36589000	22931000	30975000	28917000	30217000
0	0	0	0	1191900	781190	0	0	0	0	0	0	799500	2889400	0	0	1348800	0	0	0	957210	0	0	0	1594000	1654600	0	0	0	0	0	0	982880	0	0	0	1398400	0	0	0	1364700	892350	0	0	1414100	882510	596120	0	1614400	1734400
6520800	7399500	4500400	7436700	5418600	4060300	6100700	3360700	3972800	3664600	4108500	7484100	7262500	11150000	4172200	4355700	7680700	11224000	5060700	4939600	7983200	5328800	4551300	5218300	7478200	5402700	6131700	7319300	6959000	11302000	5046600	6672700	4025400	9372800	6217400	3397400	7227400	5694200	4404900	0	4322800	0	4386000	4780900	5456400	4889600	4419500	4356000	3457400	8505800
3548300	2847000	1877600	2012800	0	4858100	2425700	3578900	4462900	7339300	2077800	3801900	2487900	1622100	1999400	1763500	3055100	2997800	2621200	4725000	3927800	3193000	3621700	3312500	2625500	0	2503700	2018600	1679000	0	1875400	2266900	4194800	4002400	2769800	2435600	3142800	3248300	3210900	2684000	2446200	3787600	3308700	4210300	3577200	2841000	1721500	4813200	3049100	0
0	0	1710100	1472600	0	0	0	0	0	0	0	0	0	1516700	0	0	0	0	0	0	0	0	0	0	1587300	0	0	2350900	0	0	0	0	0	0	0	0	0	0	0	0	0	0	0	0	0	0	0	0	0	1782000
0	0	0	0	0	0	0	0	0	0	0	0	0	0	0	0	0	0	0	0	0	0	0	0	0	0	0	0	0	0	0	0	0	0	0	0	0	0	0	0	0	0	0	0	0	0	0	0	1301800	0
26544000	13243000	11844000	20490000	26603000	24151000	0	17090000	18255000	28837000	41460000	16692000	17609000	27336000	18747000	22732000	18365000	30121000	17017000	15605000	31111000	23499000	17713000	31838000	19122000	31652000	17461000	11703000	28778000	12649000	15457000	15458000	28911000	27076000	21584000	17135000	17536000	30884000	22299000	0	24012000	19028000	30013000	22907000	21204000	18067000	19759000	4870100	46831000	21431000
69371000	64759000	77283000	87719000	98215000	74308000	73019000	83948000	74364000	63262000	64944000	78091000	78098000	86494000	65996000	67979000	75561000	63342000	68097000	78555000	79959000	79977000	86190000	87760000	69960000	72228000	76540000	73660000	76689000	69971000	79440000	83173000	68138000	73123000	62846000	78360000	80585000	84549000	73172000	87847000	66552000	59419000	57294000	93280000	72147000	72585000	73427000	60640000	50857000	53124000
9242500	17117000	14058000	10217000	4032900	10630000	15216000	8694200	13775000	14105000	11278000	12676000	21423000	12142000	12565000	19060000	11192000	18368000	5872000	11867000	46675000	14025000	17067000	16625000	18968000	12046000	14049000	15225000	13059000	15979000	10042000	12420000	12051000	11210000	17725000	3612300	10270000	8959600	0	5968500	9626200	13175000	17703000	14266000	4952000	8682100	9285000	7082800	17596000	11602000
8344900	5216500	6449500	12948000	10367000	7509200	7709300	7076200	8873100	10199000	7865800	8401200	11116000	10901000	9477300	7877700	8429800	10002000	8562400	10210000	9353400	8704300	6247600	8961800	7028500	6631900	0	5839100	9807300	9496900	13250000	7647800	8428100	9770000	5771700	13276000	6280600	9244100	4917400	6308500	6869400	8481400	6818500	7270200	7153400	6881500	19604000	8803100	6013500	0
0	0	0	0	0	0	0	0	1611300	0	0	0	0	0	0	0	1051900	0	0	0	0	0	0	0	0	0	0	0	0	0	0	0	0	0	0	0	861850	2795300	0	0	1852200	0	0	0	1492100	0	0	0	0	2212100
24068000	25913000	23332000	20578000	34897000	23964000	25237000	22589000	33590000	32901000	24631000	25480000	24503000	22451000	21747000	23442000	34271000	34838000	38113000	26029000	49507000	26278000	28474000	34830000	38086000	23357000	23817000	28851000	23215000	24610000	25324000	27096000	22572000	35527000	24192000	24650000	22596000	19796000	20611000	34373000	27800000	24398000	30929000	22470000	31919000	32321000	26451000	18741000	16425000	10746000
13890000	25695000	13936000	24374000	22693000	23008000	23723000	23163000	21287000	22086000	0	9776900	12933000	13223000	0	0	12286000	0	23581000	20121000	15716000	0	0	16536000	19435000	15364000	24476000	21661000	18283000	0	15387000	30262000	21590000	33954000	0	0	22381000	18666000	20218000	19366000	16111000	0	0	0	20422000	0	12369000	10547000	43128000	14460000
103990000	117910000	132490000	90303000	85727000	100490000	94909000	99129000	87237000	86947000	102520000	85651000	88670000	90964000	107270000	132010000	99990000	109050000	80885000	82594000	94779000	92801000	116160000	105480000	92774000	148290000	112660000	117010000	111400000	101890000	83270000	103980000	97484000	98817000	84567000	70035000	78486000	88875000	87823000	94160000	82975000	122500000	94283000	97151000	88294000	82283000	91164000	104060000	96147000	99379000
12808000	5342300	10393000	8998200	10797000	4240100	10703000	11940000	14112000	9694500	10628000	14394000	14144000	13366000	9815800	14994000	10005000	10805000	7590000	9821100	22364000	10642000	7705300	11800000	13540000	10551000	8923600	8050700	8556000	14063000	8104900	12318000	15637000	11936000	11030000	12348000	15306000	11328000	8385900	11180000	14003000	11207000	8749600	11868000	9473100	16590000	9611900	6148600	10659000	10695000
0	0	0	0	0	0	0	0	0	0	0	0	2186200	0	0	0	0	0	0	0	0	0	0	0	1120000	0	0	0	0	0	0	0	0	0	0	0	0	0	0	0	0	0	0	0	0	0	0	0	0	0
9136600	8323300	7671900	5503600	12509000	6063300	5977400	3826500	5712400	5976100	12128000	6608300	8672000	6586200	6034600	5769400	8199100	0	10122000	6722700	11185000	18521000	5844400	0	4285900	8099700	7325700	6967400	5232500	0	9183300	4359800	11073000	9653400	10706000	9734800	6200900	6903300	5758200	4817700	6941800	9322000	5342300	9677900	9023600	4413800	4902800	4736000	0	12463000
0	784560	5176100	3982700	15379000	26269000	24867000	23684000	0	1830500	0	0	696300	0	7182700	2091300	0	0	0	0	0	4922800	3600800	1481800	0	0	0	0	5835700	7086100	8296800	9558400	8822100	9697600	14051000	11768000	1508400	5341800	5972400	1370200	0	0	2973200	0	0	0	781890	0	47902000	51730000
3236900096	3509299968	3584999936	3452100096	3498200064	3277600000	3352900096	3482599936	3217900032	3422599936	3688399872	3508900096	2929499904	3689600000	3793999872	3503800064	3051000064	3513999872	3987300096	3326400000	3379000064	3554599936	3656999936	3259599872	3403899904	3700800000	3370899968	3397100032	3155800064	3563500032	3984000000	3517900032	3395899904	3705200128	4114599936	3927600128	4115399936	3465100032	3798599936	3939300096	3509299968	3436000000	3575200000	4289799936	3850800128	3968300032	4182099968	4136100096	3817499904	3915200000
9085600	11067000	8440300	0	11764000	11662000	18966000	9646300	9216400	35448000	13434000	0	10709000	10987000	10142000	12499000	18631000	11344000	7318100	0	10057000	10666000	10930000	10117000	10719000	8199700	12116000	10202000	12929000	7044500	7144900	10059000	8298900	11658000	7954700	5350400	11052000	11765000	9322500	5331700	8440000	7742100	10911000	5267800	9022500	9307400	14506000	5601600	5471400	7008900
7102200	5129800	6266900	5986700	12416000	5370100	5088300	3992300	8514700	6935700	4856600	7177600	5110300	4430800	6456600	4959600	5806100	4525700	6731200	4739400	4633200	3466700	6901300	4641700	5025400	4052700	5511000	5970700	5373800	4064500	4862200	3912500	8642000	5404200	11960000	8208800	8693500	4863100	5848500	6820900	8999100	6563800	6724000	9110400	5093900	4423300	4202800	7022100	5231900	6011600
2520600	0	3267600	4358000	2430200	0	3295000	4225700	0	4603800	3759700	2595100	0	2959500	0	6916200	2022200	0	3523300	3580600	5462300	4577400	4968900	6912900	3060600	4255800	4996600	4284600	2753200	0	7732700	5015800	0	5670100	3233800	4708900	0	5155300	10654000	4958800	3762400	4370200	4543900	4033000	2083900	4023000	4416400	4622600	6036700	0
0	0	0	0	0	0	0	0	0	0	0	0	1456700	0	0	0	2670700	0	0	0	0	0	0	0	0	0	0	0	0	0	0	0	0	0	0	0	0	0	0	0	0	0	0	0	0	0	0	0	0	0
8189300	8875300	8814100	7632300	6054100	8781200	4511700	9230200	6476800	6327200	6822200	6072700	8626300	5802600	3025400	11742000	9679400	9805400	10745000	10930000	4964900	9700600	6759900	12846000	10129000	5680600	12637000	6344300	15458000	9442600	8594900	8340500	10364000	12001000	9002200	7754600	11066000	8740200	8515000	8047800	9890100	8721200	8650000	3735900	12793000	8367900	10811000	6919100	11652000	8655400
24698000	15236000	28646000	29025000	36899000	56983000	42418000	36652000	35376000	33904000	40791000	50112000	29252000	34853000	36041000	34048000	33354000	35451000	46013000	25339000	36156000	35511000	46971000	38404000	35120000	32083000	35098000	36946000	27526000	40579000	43652000	38489000	28790000	27822000	29759000	43058000	42797000	38854000	43697000	39750000	29353000	35225000	33760000	23367000	45242000	33529000	28223000	46452000	33978000	20325000
6100100	0	0	9498600	0	11067000	0	0	0	0	17073000	0	0	8256600	0	0	6462600	15599000	0	12398000	0	0	15302000	0	9288300	12051000	0	9997300	0	6747100	11646000	0	10095000	14029000	5946400	11094000	20157000	0	0	12268000	0	0	0	0	0	0	0	13689000	0	0
0	15607000	0	0	0	8288800	0	0	16802000	0	0	0	0	10071000	13308000	0	0	0	8023300	0	0	0	0	0	0	0	0	0	0	0	0	0	0	0	15263000	0	0	0	0	0	0	0	6028800	0	0	0	0	0	0	0
8044300	5146300	7532500	4186300	6697000	6454300	10421000	8240500	4586600	5395400	5389000	3597500	21584000	13133000	8346600	6267400	7956900	7294300	3743600	6507800	5860600	7202400	11353000	7435400	15852000	7121100	0	6458400	7812400	13637000	7931400	7761800	15772000	6940100	5967500	3370900	8690300	9948900	5229400	5646700	8349100	6068000	7881700	11221000	10196000	5578900	0	10342000	7802200	5493500
18890000	14250000	13037000	11689000	13339000	11988000	14890000	9743000	11919000	24101000	10347000	13801000	14176000	13471000	13231000	16090000	18311000	12930000	14144000	13574000	12803000	12903000	16755000	14091000	13458000	14409000	15714000	12859000	13791000	14931000	10016000	10656000	12946000	14698000	17138000	10368000	17423000	11738000	12011000	10840000	14367000	12916000	15412000	0	12801000	12217000	11076000	12619000	13753000	9419300
0	4793700	4121800	0	0	0	4283800	0	0	0	0	0	0	0	0	0	0	0	0	0	0	0	1379800	0	0	0	0	0	0	5146300	3549600	4966400	4872800	0	3533000	4966300	0	0	5507200	0	0	0	0	0	0	0	0	0	0	0
51274000	80937000	47597000	45793000	60950000	44417000	47587000	44432000	39810000	56048000	50157000	56340000	59140000	65775000	47208000	43402000	52680000	55841000	48048000	49550000	59837000	86750000	43275000	45427000	63958000	52301000	44262000	44789000	52136000	64071000	50415000	37591000	52936000	46820000	44114000	47078000	39431000	45867000	37982000	37711000	66621000	49304000	49500000	37643000	50528000	56020000	51298000	43148000	61489000	26277000
3709000	4646300	4257700	0	0	5541700	5109900	0	6947300	0	0	0	6909900	4916800	6442000	5677400	0	7453900	7664400	3646700	4801100	7027700	8355000	5912100	8609500	5636600	6796200	0	6236100	5484600	5572500	4377100	5497600	3661300	4785100	4578900	5522800	4948000	4090700	0	4757200	0	0	0	3782800	0	8235900	0	2887500	6762300
1950800	0	0	0	1683100	0	0	0	983470	0	0	0	1750700	0	0	0	1311700	0	0	0	0	0	0	0	0	2307900	0	0	0	0	0	0	1754500	0	0	0	0	987630	0	0	0	0	0	0	1521600	0	0	0	0	0
4582100	0	2638000	1955600	3054400	1329100	1537000	0	2636700	1565100	0	0	3378000	1946200	1555400	0	2820800	1600600	0	2726300	2912300	1864200	1818500	1651200	2221400	1879200	2129000	1823400	3228700	1562400	2448900	2008700	4036100	2457400	2143300	1494300	2767000	2493600	2288200	1920700	3763100	1768500	3590100	1496900	2189000	2194100	1888100	1408900	0	1336100
4114000	0	0	0	0	0	0	0	0	0	0	0	0	0	0	0	0	0	0	0	0	0	0	0	0	0	0	0	0	0	0	0	0	0	0	0	6665200	0	0	0	0	0	0	0	0	0	0	0	0	0
43174000	42077000	34465000	40072000	38719000	38109000	22994000	42520000	47821000	39364000	95255000	43199000	38179000	27816000	31850000	29423000	44262000	43574000	34607000	30719000	65544000	58786000	44933000	60005000	36669000	42446000	38265000	34406000	29841000	30088000	32382000	25760000	46673000	44771000	48185000	28204000	32799000	41225000	29072000	41343000	42889000	37633000	45032000	34553000	37272000	30878000	35478000	28172000	52968000	30758000
23639000	17337000	18965000	29507000	23068000	18625000	17910000	12547000	0	18354000	13114000	25773000	12139000	13101000	18439000	11154000	0	18194000	20006000	23481000	14797000	20410000	22385000	16429000	13703000	13527000	18020000	13395000	11297000	15973000	17374000	17606000	16299000	18323000	17654000	20874000	15878000	14508000	12077000	17305000	13911000	21293000	24784000	10846000	16825000	26836000	22288000	24171000	12043000	10692000
39606000	19346000	30386000	23045000	28816000	23780000	27548000	23317000	30984000	27677000	43741000	21078000	29989000	31310000	18394000	20219000	32694000	53241000	13255000	23901000	36451000	43809000	22265000	20883000	27461000	38990000	20554000	18991000	30550000	21940000	24909000	21553000	25481000	29778000	24843000	15623000	30729000	32127000	28582000	26122000	54152000	28141000	30720000	15528000	24074000	27524000	20768000	19933000	27948000	15383000
14021000	19288000	21328000	14152000	13919000	27689000	12583000	16082000	23646000	26324000	25972000	21304000	17956000	21203000	18067000	14155000	22237000	21812000	24827000	20160000	15406000	18260000	11632000	24272000	19454000	19207000	13383000	25148000	15583000	32133000	17768000	19669000	12354000	18366000	19692000	0	10251000	17117000	10777000	13332000	21173000	0	16224000	13737000	17609000	17405000	15147000	23928000	0	7442600
9405600	7239500	0	13872000	9309400	6627400	12795000	10025000	4356300	16947000	5309100	7259900	22676000	18496000	15545000	10707000	9276500	9082800	10085000	7875900	7356600	9355700	11082000	14304000	10637000	11904000	11245000	8550200	15640000	10250000	9570200	10523000	8842500	17784000	11440000	12553000	11082000	0	15073000	11904000	0	13949000	0	10078000	15731000	9425800	0	9260500	13877000	16444000
7096100	13872000	9371200	11750000	8312900	10208000	10370000	11593000	16508000	19697000	6674300	10431000	9652100	13885000	9005800	11968000	10088000	8892800	6761900	10909000	16657000	19620000	14781000	7382500	12382000	24114000	11906000	10810000	14354000	10363000	13562000	7720400	12550000	5103600	10887000	9321600	17025000	10104000	14756000	10419000	8306500	9906600	7377800	12269000	0	7557000	0	5583500	10599000	13432000
225740	314480	404710	553280	433420	520750	541570	448720	260580	0	284680	302350	305320	434390	394940	385750	287410	356750	498560	0	372190	382570	0	0	412050	0	0	310560	0	588960	40279	491690	204030	412040	467600	390780	443080	562910	668950	0	225550	275690	0	0	0	577050	0	0	0	207420
71521000	79800000	68236000	65956000	86766000	59645000	81645000	57008000	59634000	77631000	75757000	77600000	86044000	52214000	65809000	82447000	72384000	85777000	45686000	75364000	78856000	112320000	77388000	71506000	84709000	68069000	80762000	73555000	72035000	58995000	67924000	88147000	56782000	76104000	70748000	51580000	70856000	60183000	60612000	72779000	73070000	63107000	73179000	56772000	69266000	58870000	51689000	62360000	152510000	44457000
7013700	17118000	8259200	8451100	9198900	10905000	7970300	9963200	8981600	7507300	8045400	8532900	11430000	12975000	12331000	16864000	7583200	5946100	7705700	15798000	8096600	22904000	8966700	7858800	7869400	8785600	8028000	8874700	7675400	9261800	11470000	7991400	6938300	9161000	20169000	16300000	8712000	8402800	6218800	4748400	9472600	7627200	7972300	6101900	12961000	9279500	7964300	10377000	8276100	6759700
2713400	0	6687800	2786400	0	0	0	4887200	0	0	4612300	4486400	4008200	0	0	4511500	0	0	0	2114300	2536400	0	4031400	4918100	4156800	3741000	0	8036900	3038300	0	3280500	3254700	7446600	4358600	3831700	0	5397500	3318800	4166300	5852200	0	3602800	6301400	2739200	0	0	0	5927400	0	0
11866000	25518000	23496000	10977000	7735900	11408000	18584000	12238000	7512400	29150000	18152000	11011000	17196000	18513000	17507000	22454000	14495000	11562000	28257000	16489000	10204000	10225000	13576000	20683000	12824000	12454000	17929000	21084000	12543000	7611500	19781000	16884000	14702000	7447400	19486000	15588000	18225000	7499300	13554000	24959000	16818000	8963100	16987000	11796000	17859000	24916000	25139000	14865000	12344000	16686000
6761600	7720600	6170800	7819300	6842800	10238000	5723400	0	0	6884700	6922800	8764000	6025000	7699200	6129300	5648600	0	5938400	4835900	5323600	6410400	3101100	7051000	8167500	9518400	7037500	6928700	7518000	5746500	7296000	4568100	5373500	5401200	0	0	0	5749300	6466300	9848400	5219200	5822900	9955100	7123900	0	8599900	7152600	5965900	0	6766200	7758500
0	0	0	0	0	0	0	46909	0	0	0	0	0	0	0	0	0	0	0	0	0	0	0	0	0	0	0	34528	0	0	0	0	0	0	0	0	0	0	0	0	0	0	0	0	0	0	61137	0	0	0
0	0	2062600	0	3777800	0	0	0	0	3611500	4181400	2778800	0	0	0	3604300	5960500	0	0	2652100	0	0	0	0	0	0	8195400	3690600	0	0	2917200	4117300	3268100	0	0	0	5424300	0	2384700	0	0	0	0	0	0	0	4061700	0	0	0
1775100	5784500	858300	2600400	962240	2504000	1336600	2444500	1797500	0	5086500	3154100	1112000	0	2535400	1817100	0	0	0	1663600	1795800	3197600	2417200	2389900	1323600	4015300	2397900	2736700	1515300	0	2962900	2537200	696680	895050	0	3992500	1305300	2061500	1594500	0	0	1463900	1201600	1670400	1845700	2768400	1831800	2264200	670190	1154200
0	0	0	3417800	3541500	3819700	0	0	0	3692100	0	3601600	4004600	0	4356500	0	3128500	5905000	8019400	0	3807800	4415100	3449600	0	2748200	7722100	0	0	0	0	0	0	2090300	0	0	0	3297300	2665800	0	0	0	0	3575700	11512000	0	0	0	0	4699600	7629000
7462200	10971000	11637000	10002000	11052000	9369500	8702600	8250300	11040000	15472000	19676000	17058000	7312100	8584300	15709000	13296000	9454800	12972000	10669000	15322000	5077400	9914100	16774000	16682000	9069600	9574700	10617000	12849000	0	8702100	11586000	14148000	8714300	11269000	15381000	10532000	8943300	7300000	22027000	11923000	12230000	16671000	10755000	0	11330000	10086000	11354000	7480200	8422000	0
101290000	95803000	91369000	66524000	88162000	92033000	51201000	56777000	103760000	76034000	98028000	80388000	86288000	91842000	71158000	69739000	99730000	182290000	33818000	71244000	92960000	102810000	58904000	54841000	79553000	99183000	66588000	65915000	82422000	82440000	56019000	62260000	93596000	82896000	64185000	46339000	87855000	80521000	61220000	46995000	154420000	104640000	95889000	71003000	120150000	78629000	83964000	48028000	112670000	121220000
1915500	2226200	2890600	1857100	2631800	2183200	0	2871300	0	0	2302600	3514200	4374400	4556700	0	2792400	2540300	2637100	1772300	1405100	2754400	0	2522500	4219800	5102300	2057000	3105400	3530900	0	1608500	2425200	0	2031500	0	0	2753700	2335800	0	2543400	2793500	0	0	3099300	3579300	2067700	0	0	2456600	25317000	4276800
0	4302900	3516300	0	0	6249200	2677500	15368000	5114600	2675800	0	0	3448300	0	0	0	2954800	2676700	0	0	4767400	0	0	0	2838300	7053800	0	0	5016200	3689500	0	2438000	0	3449400	5364500	3529400	3317200	3669700	14304000	0	0	4336500	0	0	6490500	6082100	5251600	0	5649700	6851900
181680000	151450000	230250000	178480000	187900000	166440000	188270000	169270000	151720000	181470000	157500000	186760000	188380000	155610000	162050000	151760000	146710000	169980000	161770000	143100000	200820000	187560000	164050000	185310000	185260000	193760000	188860000	174770000	185590000	163890000	187230000	144560000	208480000	155700000	143340000	132850000	156700000	161700000	147290000	146550000	177060000	166230000	191680000	141620000	185030000	187090000	173430000	162470000	325440000	182880000
2340300	1117600	0	0	0	0	0	0	1653500	0	0	0	0	0	0	0	0	0	1570300	0	0	0	0	0	0	0	0	4124000	0	0	0	0	0	1699400	0	0	1221200	0	0	0	1608300	0	0	0	0	0	0	0	1161800	0
0	0	0	0	2238400	0	0	0	0	0	0	0	0	0	0	0	0	0	0	0	0	0	0	0	0	0	0	0	0	0	0	0	0	0	0	0	0	0	0	0	0	1277600	0	0	0	0	0	0	0	0
11218000	12009000	9087800	11695000	14882000	15179000	10785000	16796000	19792000	13253000	7772500	3814100	13675000	14196000	11075000	15624000	17087000	13228000	12541000	10614000	14176000	15510000	16212000	31290000	21470000	8476700	13399000	20899000	19492000	7288700	15644000	11422000	12035000	13290000	11378000	2424500	13288000	15519000	15477000	9181200	20263000	13231000	7738100	6434300	10113000	11874000	9002700	14726000	6552200	9416600
0	5271400	0	3228700	0	2734200	0	0	0	0	0	0	5820600	5366400	0	4558400	0	0	0	0	0	4056600	2702800	0	0	7606700	2513300	0	3871900	5612700	2252300	0	0	0	0	3176500	0	0	2940000	0	0	0	0	0	0	4094300	4979000	0	0	5111600
0	0	0	0	0	0	0	0	0	0	0	0	0	0	0	0	0	0	0	0	0	0	0	0	0	0	0	0	0	0	0	0	0	0	0	0	0	0	5899500	0	0	0	0	0	0	0	0	0	0	0
5867800	6641300	7774000	0	2605300	5085400	2450000	2771300	6843600	11205000	8882400	4784100	7907600	4884100	0	0	7667100	0	5830500	0	3032800	4788900	3816400	0	6054500	2962600	3671500	3631800	6986900	0	0	2462300	4849600	0	9259800	0	0	0	0	0	3758600	4450400	4351000	5894500	5068300	5224300	5013300	0	7169300	4579400
0	0	0	0	601830	0	0	0	0	0	0	0	0	0	0	0	572640	1082000	0	0	0	0	0	0	0	0	0	0	739850	0	0	0	423500	347850	0	0	0	0	0	0	0	470820	0	0	352920	0	0	0	0	0
26366000	42225000	35584000	37063000	55904000	37675000	36352000	33034000	40081000	38264000	53123000	30281000	56720000	34357000	32410000	40003000	37182000	51126000	51724000	43467000	34284000	46174000	27359000	42663000	32498000	30487000	29849000	36690000	39185000	38270000	50339000	30359000	60890000	40778000	38671000	28582000	36276000	37545000	45333000	50983000	55102000	44751000	31670000	37457000	39297000	47512000	51250000	28963000	54581000	43409000
57671000	29768000	17495000	25326000	23332000	0	25044000	0	18980000	0	21614000	19779000	25192000	31805000	20479000	18579000	21038000	18674000	21803000	21961000	30803000	27532000	29032000	32007000	18800000	37085000	20293000	23199000	0	19592000	15099000	19590000	17009000	21606000	14581000	11472000	17656000	17625000	0	14044000	15624000	666210	11511000	27090000	20183000	0	0	16561000	14115000	0
0	0	1417900	0	0	0	0	0	0	0	0	0	0	0	0	0	0	0	0	0	0	0	0	0	0	0	0	0	0	0	0	808220	0	0	0	0	0	0	0	0	0	1122500	0	0	0	0	0	0	0	0
3368600	850160	1457300	0	0	1380900	0	0	3167000	0	0	1516100	1144400	0	0	0	1279700	0	0	0	1186100	0	0	0	895460	1098900	0	0	0	1152000	0	0	0	0	1744100	5422200	2039400	0	0	0	2411100	1615000	4061500	0	0	1033500	2127100	0	3115900	3750700
2607900	0	0	0	0	5181400	0	2143400	4593400	0	0	0	1984100	0	0	0	2924000	2592000	4254000	0	0	0	6235900	3217500	3680500	2042500	1979300	2781300	2834900	3230500	2644900	2737200	1783700	2203100	0	3514900	2866200	0	0	0	0	0	0	3559600	2623100	0	1995000	0	0	0
9226800	10841000	10169000	10402000	8520700	9646200	9966700	9991700	12539000	9378400	7681600	11847000	8492900	11745000	9034200	17667000	8820100	9390700	15129000	8915500	7810100	0	10267000	10647000	11765000	11570000	13845000	14937000	10883000	11379000	11958000	11257000	11465000	11585000	11221000	7653600	13229000	16309000	11721000	21232000	7268500	9817900	11516000	8939100	15706000	14923000	11030000	10264000	6611800	4862800
9066400	22951000	0	0	10531000	11908000	0	0	11187000	11470000	0	70785000	9694300	10073000	0	12694000	13833000	15175000	0	0	14064000	23582000	0	0	13629000	0	0	0	12498000	0	12220000	22483000	15493000	16442000	0	0	13820000	19036000	21091000	11777000	18240000	15879000	21889000	0	17192000	18208000	0	0	11994000	15183000
22304000	17336000	27045000	20545000	30026000	29037000	23140000	23244000	22357000	26603000	14694000	16487000	44099000	27416000	28428000	30172000	20827000	36807000	22427000	18944000	20389000	26746000	25189000	20145000	20593000	27835000	23572000	25449000	22252000	27155000	0	21698000	21592000	16918000	14394000	13391000	29987000	20177000	22102000	21362000	36948000	18459000	18465000	28447000	63800000	38156000	34040000	20632000	33541000	23386000
41959000	24742000	37393000	36226000	35529000	21475000	19389000	20950000	30772000	25380000	59073000	65326000	31588000	40495000	5754300	28489000	41301000	33896000	46224000	38759000	38754000	43524000	33507000	28966000	28199000	33479000	45094000	0	37663000	33918000	21461000	31196000	52412000	35297000	24415000	38812000	30938000	27308000	34658000	31867000	236610000	38207000	30584000	70908000	20331000	26741000	30054000	21344000	42003000	45391000
0	0	0	0	0	1110700	0	0	0	2226300	0	0	0	928140	0	0	0	0	0	0	0	0	0	1808900	0	0	0	1740300	0	0	0	0	0	0	0	0	0	0	0	0	0	840000	0	0	0	4108600	0	0	1281100	0
3729200	4034000	2194000	1887700	1725200	1992700	2189400	2885900	2798300	4967600	0	1675100	1876600	1471000	2165100	2247300	1775400	1317600	1384400	2927100	1697200	0	9543800	2115100	1885500	819160	2312400	1928100	2547200	2610500	2124200	2568100	5268000	2405000	1511700	0	2885800	3199300	0	3262100	2712700	3273900	0	2088200	1504900	0	2057400	1854800	0	0
0	0	0	0	0	0	0	0	0	0	0	0	0	0	0	0	0	0	0	0	0	0	2064900	0	0	0	0	0	0	0	0	0	2579600	0	0	0	0	0	0	0	0	0	0	0	0	0	0	0	0	0
1645000	1416100	0	0	1960500	0	0	0	2337500	0	0	0	1935000	0	0	0	1569900	0	0	0	1477100	0	0	0	1957800	3355000	0	0	0	0	0	0	0	0	0	0	1950700	0	0	0	1458000	0	0	0	0	1286100	0	0	0	0
14246000	8306900	9190300	9655800	9763500	10130000	10821000	9211100	9138200	9245600	6294400	8378400	13152000	13070000	12472000	13604000	15235000	12316000	12025000	9164400	14180000	8297100	10051000	9838600	12231000	12473000	10893000	11403000	11860000	17385000	10894000	12044000	12840000	11355000	12528000	6616900	11144000	12492000	12970000	10041000	14546000	10392000	8706000	12640000	18015000	14317000	11189000	9424200	0	15837000
4981500	6722700	8644600	0	8082200	5106900	4987300	5698200	6126300	5710100	5421500	8148000	8005500	5853100	7478900	6787300	8047500	5351400	4502400	4628700	20888000	10392000	5068400	8929100	0	12614000	7049700	7536700	7437000	5965300	5340100	5480000	6641500	7304500	6023000	6138400	0	4915300	3641100	7164000	0	12521000	7351700	5225400	5787300	0	0	5753800	9291700	4042500
33475000	29886000	25322000	31566000	39589000	26761000	19126000	27149000	35323000	19365000	51096000	43392000	31148000	33705000	22517000	27427000	54050000	27865000	20213000	27557000	38149000	27837000	21354000	39040000	31337000	30294000	19405000	28894000	24902000	30992000	20595000	27070000	35947000	32265000	24720000	23519000	39825000	38003000	24652000	27111000	29854000	32705000	22213000	25302000	38524000	37537000	26442000	20155000	33683000	21787000
2493500	0	0	3235000	0	0	2764500	0	0	0	0	0	0	5321200	0	5948600	0	0	2828700	5069100	6801700	0	3593500	712230	3371600	3401900	5132300	3384800	5194700	0	7653600	3613300	0	0	3169200	2248700	0	2132500	4253200	3485200	3106700	0	3374200	3243900	3455700	0	0	2243800	4571300	3070200
0	0	0	0	0	0	0	0	0	0	0	0	0	1010300	0	0	0	0	0	0	1602400	0	0	0	0	0	0	0	634060	0	0	0	0	2178600	1274800	0	0	0	0	0	0	1921000	0	0	0	0	0	0	0	0
0	0	1801800	0	0	0	0	0	0	0	0	0	0	0	1103000	0	0	0	0	0	2300500	0	557550	0	1394800	0	0	0	0	0	0	0	0	0	0	0	0	0	0	0	0	0	0	0	0	0	1030700	0	0	0
29603000	49330000	53092000	42116000	41947000	61822000	56682000	39057000	37225000	28316000	41554000	43350000	66691000	69957000	54192000	50265000	49975000	57578000	38394000	34552000	57619000	41779000	49020000	47085000	46040000	41899000	45681000	35346000	40404000	47015000	37243000	36290000	27796000	27466000	27826000	23367000	29413000	32906000	34189000	29741000	39483000	48164000	35742000	50535000	39309000	44357000	40397000	39744000	40133000	51831000
7011900	10312000	7069600	7604700	6337000	0	9175300	8636200	71133000	8246300	8560300	0	8180700	0	0	9206800	17010000	0	5221700	6113200	0	7588200	0	6225400	0	0	7016300	7014700	0	0	5494500	0	10447000	0	0	7173800	7093200	14886000	6851300	4125100	7064200	6378200	7184200	4647800	3653700	0	7219600	10215000	0	0
0	0	0	0	0	0	0	0	0	0	0	0	0	0	0	0	0	0	0	0	0	0	0	0	0	0	0	1680200	0	0	0	0	0	0	0	0	0	0	0	0	0	0	0	0	0	0	0	0	1643000	0
7032800	8789000	7428100	9675400	8116200	10476000	10593000	13901000	13456000	15435000	5438800	0	8369900	12362000	14637000	11470000	24908000	17006000	8713100	6640800	11127000	11345000	9219300	14529000	6333200	5417900	8647200	10761000	7952200	5023200	7995600	9505400	7627400	11143000	29960000	10895000	24224000	10853000	10985000	6547800	11846000	6324300	11564000	4487500	7433700	11255000	12451000	20040000	9585300	11841000
0	14907000	8770800	9348500	9046000	8228300	0	7585600	8799700	10506000	10064000	0	10007000	0	5012500	4766000	13757000	0	0	8599400	6678000	0	0	7348300	0	0	5796000	6921900	10150000	4720500	0	8186700	12752000	13520000	14726000	13314000	0	10834000	0	0	8574000	14898000	11670000	15314000	6413000	7037600	0	0	11865000	14494000
365649984	382840000	335920000	322700000	421560000	428060000	354660000	346380000	383449984	364280000	417129984	369660000	412520000	410350016	323380000	399120000	366150016	472649984	372969984	386569984	447580000	403180000	377190016	393110016	585859968	425369984	490049984	305969984	420160000	340030016	350700000	361960000	302000000	317390016	376609984	397990016	385960000	378840000	307440000	283040000	401750016	365380000	293830016	282369984	414760000	405500000	358409984	318260000	230200000	184640000
7547500	12158000	14736000	13879000	15838000	12516000	12790000	15352000	15760000	18077000	20981000	20046000	9191800	13977000	15530000	14935000	8924000	12361000	15933000	19055000	9281200	11109000	12787000	19735000	0	9547000	11424000	15465000	13944000	13135000	14262000	16477000	4778400	14686000	14336000	16040000	4767400	22216000	12359000	16962000	9458000	13427000	15957000	21097000	10777000	11488000	18362000	16892000	10477000	0
775670016	591379968	861800000	946419968	335460000	364660000	581670016	1143299968	1097100032	766640000	1412099968	1039600000	783379968	927859968	763249984	936419968	811900032	467280000	1320800000	2669600000	863859968	533150016	771710016	1098200064	865600000	941929984	1717799936	884179968	654470016	1041200000	2316699904	1475699968	822710016	682380032	736499968	695360000	1016800000	645950016	575430016	2383399936	875649984	792920000	636099968	1349600000	737750016	569369984	755180032	1594599936	1300899968	459929984
46783000	20129000	26295000	20689000	31357000	20336000	22709000	23641000	18163000	30730000	20466000	25553000	43179000	24236000	16824000	11745000	31093000	20264000	25092000	25382000	31519000	23925000	20027000	35074000	36753000	17881000	26988000	25554000	28359000	20962000	26400000	21290000	30567000	26225000	23147000	21796000	27256000	35367000	19935000	26012000	29482000	25292000	20070000	16147000	35756000	21730000	20409000	19972000	22926000	14297000
0	0	0	0	0	0	0	0	0	0	0	0	0	0	0	0	0	0	0	0	0	0	0	0	0	0	0	0	0	0	0	0	0	0	0	0	0	0	0	0	0	0	0	0	0	0	0	0	7645800	9732500
145000000	232110000	193690000	230840000	210280000	210030000	159630000	281200000	242940000	216150000	201980000	403849984	213200000	169310000	223410000	322430016	330960000	205670000	271320000	208920000	196640000	266250000	219580000	256550000	264010000	201600000	235070000	262910000	266240000	272990016	143470000	225150000	181430000	195950000	208170000	261080000	190890000	220950000	169690000	217050000	191660000	188410000	214280000	294289984	199140000	204880000	212500000	271000000	156260000	160890000
0	0	0	0	0	0	0	0	0	0	0	0	0	0	0	0	0	0	2485800	0	0	0	0	0	0	0	0	0	0	0	0	0	0	4836400	0	0	0	0	0	0	0	0	0	0	0	0	0	0	0	0
66716000	69564000	67954000	73300000	74528000	78466000	75259000	59009000	101910000	79480000	59369000	103860000	63383000	72366000	85612000	71903000	79064000	68510000	76784000	53886000	77794000	81851000	70163000	65787000	62693000	67572000	61890000	64675000	72098000	64868000	64315000	65737000	79731000	101260000	84860000	62320000	66365000	77585000	65913000	50689000	69788000	91412000	63174000	71286000	82929000	104660000	87698000	72757000	88930000	83678000
9731600	6984900	6198300	7468800	9160000	4945100	6052600	5309900	4977800	6775200	15032000	5674100	0	7347200	5374400	6290600	5053500	6390000	4082200	6482400	5938100	0	6792100	4741000	6683600	7510500	7749400	6354800	5466000	6800900	5031300	4024400	4203900	10190000	6270400	4194200	3600500	7528800	3370300	5905800	11448000	4307100	5155100	7933000	8475600	5449800	6951400	10283000	8815100	4528600
3430400	2383200	0	0	0	2387600	2502600	3690400	0	1674100	2741300	0	0	2947200	0	5948500	3435200	2180700	8194700	2704700	0	3022600	2907300	4333700	0	1852400	2741800	4416600	0	2028900	3725100	3029800	0	2414000	0	0	1619600	3826200	1893600	2121200	0	3369700	2214300	2904200	2147100	1608800	2666200	0	0	3273100
0	5699800	7323400	9773800	11229000	8233500	0	15090000	9385900	11225000	10248000	7491400	5953200	4477100	13301000	10565000	8560700	0	11101000	10055000	15108000	7409000	14248000	10933000	0	0	15861000	10889000	9755900	6389100	14937000	8965800	0	6250800	4668700	7093300	0	0	8029000	8079700	15809000	7548000	12178000	8446900	0	10753000	6586600	0	0	6361500
99383000	179660000	129880000	182500000	94373000	117810000	115970000	107360000	80588000	58012000	44851000	88417000	78435000	137100000	104200000	71700000	125250000	151390000	85884000	121330000	116030000	124750000	129210000	87853000	109990000	168300000	144450000	96617000	121720000	108320000	94511000	109770000	96398000	106780000	112540000	91723000	80202000	97588000	113780000	52475000	74506000	188570000	130880000	69503000	119240000	125190000	97534000	82069000	67329000	121330000
9994500	11255000	11993000	0	10504000	16301000	0	0	8494500	0	12257000	5459000	7482300	9244300	0	0	15823000	11398000	0	0	8708600	0	0	0	0	11218000	0	0	7530200	10735000	0	0	6730800	8573900	0	5106800	8434400	22457000	7708500	0	9446100	11465000	0	0	9178500	13449000	18714000	11888000	6937400	6658100
2105000	0	0	0	0	0	0	0	0	0	0	0	1874100	0	1373100	0	1741800	0	0	0	0	0	0	0	0	0	0	0	0	0	0	0	0	0	959120	0	0	0	0	0	0	0	0	0	0	0	0	0	0	0
13262000	17778000	9504500	8535800	11782000	12041000	10923000	9881500	7017700	11581000	8389700	10887000	12127000	23804000	7110900	8761900	14052000	14715000	6661500	0	13622000	10805000	6473300	5886800	9778700	11008000	7180000	6423300	14121000	12763000	8105100	8592400	8471300	9364500	7147400	4882700	12495000	10617000	4683400	8762600	16434000	20321000	8303100	8082900	14351000	14756000	9206900	5691400	9571600	8294900
20313000	9503400	10585000	10761000	9635300	3889900	9267400	6058800	9768100	14667000	8266700	10834000	8559900	11218000	7444900	0	10006000	16937000	8703300	7161700	10449000	9796000	0	1929900	19234000	15936000	5642500	10151000	7982000	6944500	9338500	4490600	0	10716000	0	10073000	10339000	11136000	6509000	0	12486000	8733100	0	0	28864000	6490800	10374000	9588300	0	20561000
28899000	50867000	30304000	25480000	28219000	36573000	29195000	42298000	34839000	31546000	26791000	29265000	42544000	35278000	24951000	30171000	27949000	40934000	21002000	23042000	39888000	33707000	33364000	30581000	47572000	45012000	24216000	31189000	41584000	39145000	30109000	26916000	34225000	43043000	23636000	22029000	37685000	29824000	21938000	22770000	34218000	41472000	29274000	35235000	26635000	60602000	31253000	49563000	34958000	42573000
6950000	0	0	0	7958400	0	0	7325900	7735000	0	4070900	12690000	0	0	0	7240900	7094600	0	0	0	6992000	5981800	0	0	13643000	0	0	0	0	0	0	7137600	8330900	0	0	0	5848200	7679100	0	0	10281000	13046000	0	0	6946200	0	0	0	0	0
0	3003400	3334000	3381800	3209400	2849900	4111600	0	0	3428400	3300300	2396300	2841500	0	2573700	2324700	0	3124600	1441700	2795200	3673300	6297500	2809800	2565600	4997800	2826700	2582600	0	2831300	4865700	3576300	2603200	0	4439900	3317200	5771100	0	2190000	6428600	2848600	0	0	2264600	1565100	0	2884900	2931000	2227100	4432400	0
5120900	10528000	0	0	6505200	7886000	5630800	5419400	6222000	0	4644600	0	0	4238800	0	0	0	5138500	6022200	6648100	0	6393900	0	0	8136600	6746100	0	0	3497200	3633600	4552600	4156700	0	5027100	3435200	4884700	0	3811100	0	6553700	6891500	3241900	6085400	7832100	7438600	4502800	3759000	0	6602700	4671300
0	0	0	0	0	0	0	0	0	0	0	0	0	0	0	0	0	0	0	0	11844000	0	0	0	13334000	0	0	0	0	0	0	0	0	0	7734600	0	0	0	0	0	0	0	0	0	0	0	0	0	0	0
4718600	0	4576800	0	3470200	3203300	0	0	5419700	0	0	0	2438500	4996800	0	5860900	0	0	0	0	6514900	0	5097600	4974500	5191700	4034400	4124700	5005000	3457700	3224800	6081500	6130700	0	6418000	2823300	0	3200900	0	0	0	2750900	4047200	0	0	0	8657700	0	2967700	0	0
138000000	137220000	117490000	140340000	119200000	155450000	125940000	141650000	129220000	105930000	125520000	115870000	139730000	135850000	130740000	147360000	104940000	101470000	124280000	132820000	114820000	116520000	148800000	140530000	117740000	112480000	126230000	149700000	130530000	123930000	150470000	152690000	94142000	105230000	87899000	96760000	102330000	90971000	105120000	109190000	103430000	99474000	103710000	116130000	109090000	92057000	113180000	103120000	71888000	80793000
4058200	4519100	7689200	2038500	4468200	4444800	0	0	2690600	759740	0	0	2764500	5529300	0	0	2847900	12811000	0	1346100	3357700	2225700	0	0	3535200	0	0	0	3930200	9615500	0	0	0	4501400	0	0	0	2322600	0	1768800	0	1244800	0	0	2497100	4127000	4074800	0	0	0
81342000	59658000	61634000	52303000	88286000	93786000	83857000	70519000	91659000	86893000	84951000	57852000	71270000	56710000	64102000	68557000	90587000	61418000	69254000	67719000	79477000	58220000	80203000	81197000	85923000	61854000	75202000	77589000	95929000	78001000	71800000	70958000	78686000	62014000	53870000	58350000	72362000	81163000	76763000	62713000	80011000	68469000	81807000	71816000	86892000	101550000	74616000	87472000	82146000	78138000
256940000	229900000	257970000	281550016	239500000	284100000	278480000	272260000	214970000	218750000	271720000	234450000	227490000	244200000	256400000	254580000	228210000	231110000	275640000	268449984	255540000	294100000	288280000	288449984	202310000	242810000	260780000	252130000	239910000	245330000	266140000	238930000	247420000	234330000	218280000	234790000	216050000	245210000	257320000	270289984	256460000	248280000	236040000	308790016	284120000	279449984	249620000	276529984	248810000	239030000
5062400	0	3270800	4895600	4844600	6952800	0	4297600	5385200	6826000	8216600	2465400	3941000	6613900	0	4267700	4876600	2899200	0	5525400	5961900	6031000	4698600	8825300	4589500	3384800	5711600	4513800	5142600	11915000	4646300	5963600	5032300	7084100	3807800	13528000	5231400	5035700	4817500	0	5951300	5480900	0	3181900	4897600	6702300	0	4935200	9273600	7597800
136490000	96246000	104390000	126950000	92986000	126630000	104260000	124800000	79458000	111710000	138300000	116050000	118070000	100190000	91454000	116480000	84063000	67685000	141650000	126220000	76113000	112690000	100130000	119870000	121900000	88203000	102260000	144090000	96740000	141910000	122130000	139110000	104430000	75342000	120230000	147220000	90260000	95293000	161610000	114280000	88800000	110660000	111900000	117920000	81295000	100880000	111540000	110500000	98084000	95809000
0	0	0	0	5858600	6164100	0	0	0	6310200	0	0	0	0	0	0	4640600	0	0	0	0	5628700	0	0	0	0	0	0	0	12611000	0	0	0	0	0	0	0	0	0	0	0	0	0	0	0	0	0	0	0	0
0	0	0	0	0	0	0	0	1190800	1706000	0	1305000	978840	723200	0	1156700	904140	0	0	1165900	996320	836020	0	1370300	2020600	962600	1054000	1795800	0	0	1172800	1192700	0	0	0	0	0	0	0	0	3237200	0	0	1479900	0	0	0	0	0	0
43256000	49077000	35418000	58054000	57526000	49557000	54639000	59496000	35606000	88390000	39620000	49269000	60938000	52061000	56966000	64274000	55921000	68121000	42839000	53779000	46647000	54426000	51716000	47565000	47093000	41721000	47077000	58344000	65350000	41686000	62691000	55567000	50356000	39376000	60069000	14750000	57648000	46001000	49132000	49877000	43151000	38461000	51564000	43080000	55164000	49135000	62418000	51062000	42399000	47545000
0	3200100	3757600	4722700	2543900	3823000	7097000	4583800	4967800	7186300	6509500	0	3729900	0	5698900	5221500	3458800	2456800	0	4609200	0	6472400	5070300	5443900	6605000	8334400	0	5171000	5419100	3010400	5667800	4417400	3972200	3092900	2722500	0	4323900	5497400	0	0	4586300	6118900	2669600	5595100	2610500	3900700	5997700	1861500	10810000	0
4615200	0	5303500	0	4052900	5902600	5728000	4857400	9259500	4489000	6000900	0	5282800	7962000	4451900	7519800	10510000	5456800	2343900	0	8115600	6794500	8028100	0	6252500	5276000	0	5711200	5021500	4160000	3522300	9319700	4682100	5377200	2838700	0	5995600	6529500	5978500	0	5992500	7999900	4479100	2846000	7152500	4318200	4885100	5817500	5753200	9679500
8920700	13782000	9866800	0	0	10108000	7730700	7016800	11402000	6661000	14041000	8438100	9095800	12679000	0	8021600	14717000	13854000	0	9372000	13905000	8548600	0	11196000	13439000	16691000	11347000	9904300	9162900	10560000	4939600	5099500	6919000	12086000	9503200	0	9207900	13610000	5245700	9974200	14447000	12458000	13221000	8237000	23223000	10768000	9326500	9379300	8056000	12671000
0	0	0	0	0	0	0	0	0	0	0	0	4589400	0	0	0	0	0	2949700	3784000	0	0	0	0	0	0	0	2466500	0	0	0	3183600	0	0	0	0	0	2038000	0	3037200	0	0	0	0	0	0	0	3399300	0	0
535160000	436849984	598150016	565219968	551369984	555249984	521870016	628099968	425169984	514740000	541569984	545160000	347249984	454920000	534160000	505220000	490670016	595379968	565830016	515740000	515329984	488960000	544200000	521849984	558329984	563529984	642099968	471460000	416489984	512310016	452849984	431280000	468910016	583160000	522920000	569969984	409220000	508260000	535660000	471080000	497900000	538280000	649720000	492380000	458100000	604579968	572169984	543139968	499180000	463390016
32953000	37837000	22567000	29449000	22872000	25428000	31477000	12942000	26483000	19994000	9143300	7131000	22913000	24017000	21310000	22425000	44459000	24715000	26294000	20527000	22112000	37449000	19089000	10347000	28854000	21147000	19673000	21891000	25827000	26317000	18009000	21281000	37244000	19843000	23794000	15428000	26573000	29823000	21124000	19377000	28059000	26785000	24384000	9577100	42661000	38445000	23463000	17532000	16525000	36761000
0	0	0	0	0	0	0	2742500	0	0	0	0	0	0	0	0	0	0	0	3237800	0	0	0	0	0	0	0	0	1820400	0	0	0	0	1470800	0	0	0	0	0	0	1112400	1956600	0	3899800	0	0	0	0	0	0
0	0	0	0	0	2078100	0	0	0	0	0	0	0	0	0	0	0	0	0	0	4775800	0	0	0	0	0	0	0	0	0	0	0	0	0	0	0	0	0	0	0	0	0	0	0	0	0	0	0	0	0
11298000	9368600	7365000	9476000	13970000	14214000	10164000	4727200	13109000	13374000	19339000	0	14515000	11445000	9726300	7204100	38326000	8953300	20818000	11356000	11770000	15878000	13031000	7204200	10940000	10218000	7646700	8811500	8053200	15973000	12883000	14564000	10979000	18621000	11387000	8985200	10512000	12030000	13780000	8880000	9840900	8427600	8831100	4748200	4058600	6466500	5969600	7601300	10671000	11055000
3097300	3104700	0	3601300	0	2915200	5055200	3604100	4096300	0	0	2732000	8210800	3251600	2841700	3977300	3647800	3532900	2234200	3420500	3185500	0	3966600	3225400	3104600	3795100	0	5507400	1552200	0	2125400	1820700	3157700	2827800	2808000	2297700	0	0	0	0	6856000	0	4168400	1286100	0	0	2301800	0	6065300	6071900
1688200	0	0	606540	1838400	949570	0	0	0	0	0	0	0	0	0	0	0	0	0	0	0	1888000	0	0	0	0	0	0	0	0	0	0	0	1367100	0	0	0	0	0	0	0	880210	0	0	0	1056200	0	0	0	0
15457000	0	12832000	12810000	15736000	7904300	9250300	11000000	9956700	10438000	12455000	12538000	11646000	9799200	12316000	12736000	14448000	9921800	5633300	12204000	15907000	17624000	11705000	14189000	11015000	16741000	12542000	11487000	8331800	13157000	13252000	12933000	13979000	5318200	9554400	5222500	10258000	0	10767000	14559000	12628000	0	11713000	9981900	11986000	0	14096000	8605300	15462000	5156400
7800200	6331900	11514000	4717800	13728000	15477000	8242300	9151200	7890700	12851000	8681000	12402000	7473600	12243000	10141000	9653000	10049000	8600200	7452000	7782300	7930700	0	7808400	7115200	9759600	8961800	9764700	7709400	10534000	9145200	8751000	9109700	8489500	0	8705800	4996900	8403100	6868800	7946400	5846900	8969700	7703900	6079800	5416100	8309800	8361400	7691800	5395700	0	3659400
13139000	12427000	12486000	11171000	12747000	7663500	15202000	15800000	13500000	6982700	17387000	15509000	13689000	8267900	13528000	16088000	13797000	15514000	16398000	15023000	15613000	8871600	12938000	18587000	14051000	17203000	14970000	12208000	14783000	12584000	14233000	19951000	21182000	14281000	17626000	16870000	14847000	19774000	11262000	18011000	10208000	11968000	17747000	14110000	12222000	14186000	11947000	11185000	17096000	17431000
2700400	0	2352300	2892700	1080400	1574700	1467000	2721400	1199500	1450700	2480900	0	0	0	2619300	4097400	0	2493800	2316000	3212000	627830	0	1401900	1825900	848480	1572600	1704700	2134600	0	2481700	2034000	2467700	4478700	1253000	1576100	1881300	0	2266600	2904500	0	0	0	1453500	0	2091700	3253200	1863800	3115600	960980	1377600
0	27396000	21081000	14811000	18497000	20152000	0	16523000	20405000	23846000	30598000	17201000	16841000	23894000	20633000	25762000	15807000	20210000	27952000	20914000	25510000	37460000	0	22217000	33317000	18035000	0	24687000	0	22985000	23030000	18012000	0	0	33710000	0	0	20352000	18735000	25827000	0	18238000	10371000	15628000	21742000	24054000	16455000	0	0	0
127210000	200480000	121700000	146960000	135550000	169160000	158740000	126340000	94867000	142180000	120760000	97590000	174400000	143660000	180540000	147120000	136710000	160010000	142350000	149990000	149990000	198590000	143870000	118450000	153170000	156990000	157300000	147250000	147330000	140310000	124390000	124950000	120960000	157990000	138010000	106460000	129500000	150080000	148950000	102660000	134270000	161770000	148100000	126390000	132500000	152710000	148640000	105280000	121430000	159490000
15104000	19820000	20659000	33509000	18709000	23481000	24478000	29934000	29689000	27858000	38074000	33428000	22974000	22275000	25161000	29887000	21167000	14632000	23749000	21581000	21538000	24016000	23111000	32225000	30714000	14277000	13935000	24341000	26016000	30357000	24218000	22836000	17039000	13584000	19207000	34736000	19571000	29634000	16902000	21585000	13370000	15322000	19177000	22477000	21871000	19945000	21861000	21485000	10387000	17560000
530150016	557660032	575180032	579000000	514369984	584790016	507240000	517860000	537569984	508940000	582259968	515409984	515960000	596840000	501689984	611240000	606480000	617249984	681400000	558300032	555230016	610620032	563059968	550190016	562560000	561950016	523110016	549920000	475390016	492110016	526550016	527140000	654089984	598140032	620849984	647369984	556369984	541180032	565440000	476020000	525900000	615449984	536969984	530960000	449880000	533280000	559200000	576790016	771779968	698480000
40906000	29569000	39568000	24172000	34088000	32874000	38134000	30420000	26170000	23460000	28275000	31468000	41901000	37149000	31693000	46195000	35970000	45404000	25623000	41739000	36918000	31858000	36327000	31952000	44355000	43948000	38268000	38782000	39863000	33123000	42219000	46325000	46032000	27756000	35150000	28187000	39896000	26020000	29234000	16096000	46223000	30892000	41844000	22650000	41492000	26964000	35972000	20557000	65311000	34522000
2664200	0	0	0	0	2782400	0	0	0	2169700	0	0	0	0	0	3874700	0	0	0	0	0	0	0	0	2174400	0	0	0	0	0	0	2421600	2081100	0	0	0	0	0	0	0	7557500	0	0	0	6390600	0	0	0	0	0
20785000	26417000	23122000	25814000	19588000	22228000	17697000	22479000	27745000	24314000	29339000	21585000	13590000	12219000	18864000	21663000	25723000	11420000	15316000	27957000	13255000	32073000	17205000	26053000	20391000	21462000	22820000	18810000	12901000	15804000	16619000	20695000	25399000	23361000	18937000	15108000	27290000	50966000	15183000	34108000	21457000	23744000	29397000	31979000	0	36106000	24058000	27392000	21012000	20153000
66034000	70011000	68821000	65141000	64123000	78977000	69004000	59920000	67683000	55764000	71354000	68584000	58817000	75820000	83434000	62577000	63324000	83735000	54651000	63263000	77042000	71208000	70917000	65700000	74328000	96934000	75558000	75661000	74731000	101450000	69749000	66120000	64223000	90736000	60453000	57858000	65223000	64102000	73819000	69117000	68814000	93921000	80732000	66099000	75044000	67402000	64253000	57940000	98758000	81394000
7920400	11332000	4887600	6037600	8041200	5717500	0	4301300	0	6201100	8883100	4791400	13352000	4763000	3406900	4773500	8191400	6712500	0	4911900	8264400	5732200	4445200	3692700	12912000	0	5631000	7487400	8921700	0	4325600	6323700	6439600	9569900	5119200	0	6351600	11188000	7602100	6036800	6052800	5808700	6829600	3760000	10675000	13531000	9549100	0	5774700	1759500
33121000	37953000	35193000	41564000	43006000	53578000	53769000	37500000	51722000	56364000	36448000	41682000	36122000	57490000	45288000	57474000	40981000	35045000	46414000	38697000	43786000	69435000	47214000	42818000	51911000	46807000	44464000	41229000	47388000	44370000	47583000	49072000	22604000	24586000	25434000	44122000	31214000	42905000	28962000	39552000	40604000	32730000	36373000	52806000	38361000	45606000	37058000	51198000	32456000	32642000
7766100	4298100	9517500	6491900	0	4502100	7356500	5727000	5933800	6282900	6084900	10323000	8190900	10429000	10234000	10476000	6609900	9394200	8519400	7168700	0	6354400	7026000	8291800	8724200	14198000	7125900	11652000	10409000	7889700	5112700	7865900	8115200	8496500	8525000	9082500	12558000	12900000	8851800	9267300	5228400	9057900	11095000	10173000	7559500	7637900	9501200	11129000	7356800	0
0	0	1484200	1840500	4172800	4454500	1603600	0	1799600	1811300	0	0	1446600	1905100	1615500	0	652670	1309800	3215500	1941100	0	1869100	1826300	0	0	1622500	1938000	2321800	0	0	1704700	1142200	0	1050500	1859600	467590	0	0	1103700	5001500	0	1200600	1238100	0	0	750680	0	0	0	6428200
118980000	181550000	148430000	135080000	142270000	176630000	145450000	127730000	152100000	158600000	125840000	169770000	159110000	212960000	139570000	135570000	151200000	172930000	160470000	111530000	120560000	148400000	190090000	121320000	152430000	230140000	163570000	113540000	158050000	124620000	131610000	135710000	153930000	134130000	125430000	121630000	128770000	177430000	123620000	77853000	107700000	116760000	121630000	85884000	120900000	120170000	167280000	110490000	86892000	101570000
0	0	0	0	0	0	0	0	0	0	0	0	0	0	0	0	0	0	0	2774500	0	0	0	0	0	0	0	346760	0	0	0	0	0	0	0	0	0	0	0	2391600	0	0	0	3536900	0	0	0	0	0	0
247910000	256600000	272100000	256860000	269140000	253850000	251990000	257110000	201970000	176500000	168900000	170740000	205650000	206810000	212910000	212020000	225440000	215260000	246510000	256530000	253160000	212760000	233230000	227640000	210440000	165890000	226860000	237140000	204890000	199300000	193030000	224830000	246470000	273129984	270840000	267110000	252230000	248770000	211700000	199070000	306830016	291350016	242290000	193530000	246460000	249660000	245850000	187390000	349089984	294860000
23944000	83546000	32381000	28700000	29184000	25229000	14905000	34463000	43367000	27153000	15809000	23916000	41842000	22326000	18340000	34189000	37292000	35546000	32513000	14970000	37289000	24136000	31472000	34881000	57197000	23979000	18966000	36797000	27383000	22317000	20519000	11952000	30329000	54237000	39303000	32664000	31152000	43673000	16538000	22147000	21133000	44427000	48736000	29588000	24082000	28556000	14246000	18599000	23230000	24525000
65093000	81863000	77092000	67151000	81820000	86545000	69669000	67222000	74638000	56148000	54175000	93370000	66690000	89023000	62173000	66862000	95495000	71543000	62513000	59550000	131660000	75360000	74212000	64841000	76135000	86241000	71749000	86822000	83024000	93062000	42646000	73110000	61060000	83634000	67708000	59377000	71051000	55042000	54601000	54215000	69363000	60421000	78301000	83641000	110880000	77435000	83749000	68127000	72076000	117970000
0	7667400	0	0	0	6559300	0	0	0	0	0	0	7048700	0	0	0	0	0	0	0	0	0	0	0	0	3690500	3607100	4981800	0	2052100	3280200	3139200	0	5048000	2604500	2390000	2637600	0	2872100	0	4039800	8435400	4951300	0	0	0	0	0	0	5264000
170450000	77886000	110270000	144250000	66921000	32440000	145630000	166270000	68107000	131890000	90630000	111830000	91323000	117850000	140930000	153250000	73479000	90015000	130790000	111020000	115430000	35709000	125770000	166810000	101160000	75166000	129980000	195060000	97090000	255610000	136660000	153080000	189440000	81401000	64893000	200470000	116410000	110460000	86050000	116930000	90319000	153360000	135800000	149390000	125230000	88639000	85144000	222510000	71055000	114390000
19804000	19230000	28394000	10017000	19577000	22475000	24628000	22211000	20997000	18372000	22171000	11442000	18584000	21274000	33002000	22327000	10391000	27111000	20354000	18440000	22628000	25003000	24861000	22829000	23028000	17688000	16147000	17350000	13188000	15659000	17301000	13969000	15700000	21399000	23070000	22854000	9642900	8792300	20909000	12544000	23010000	18275000	28572000	17888000	19820000	17377000	19440000	10810000	15640000	14256000
0	2119100	0	0	0	0	1816400	2320200	2539000	0	2130800	3185600	3319900	0	2126700	2582200	0	0	2087700	3259700	0	0	0	0	3437900	0	0	2277200	1280300	0	0	0	0	4208000	2010500	0	0	0	0	2155600	0	2500100	0	0	0	0	0	0	1262500	0
1766800	3258200	2176500	1731200	3995600	2127600	0	0	1715300	2404500	0	0	1593300	1438000	2283800	2563200	2306500	5564600	0	0	0	4804200	2313100	0	1411500	1992000	1982600	1857900	1911000	1119000	2270000	3747000	1665900	2817000	4754100	0	8845100	1059100	1466400	0	2471000	3209800	1773000	0	2462100	0	2061000	0	0	1420200
16141000	15734000	13991000	16706000	15013000	11442000	16316000	17881000	17736000	19680000	15509000	26449000	21443000	13996000	20720000	23038000	15971000	13536000	13071000	15478000	18950000	15302000	17116000	17728000	19922000	31517000	18106000	18990000	29540000	17702000	16901000	15487000	19970000	20877000	26350000	26618000	15540000	16511000	15678000	16012000	29237000	21868000	24802000	21117000	18765000	14766000	19903000	22245000	14032000	13638000
19893000	24878000	16413000	13092000	19095000	31682000	23058000	19907000	25776000	24430000	14623000	18072000	11002000	21084000	9446100	19199000	21955000	21431000	15575000	18464000	19087000	13651000	18994000	20454000	21769000	17998000	15287000	9607700	19486000	17691000	13715000	20448000	22286000	12154000	26957000	21091000	18338000	22469000	19952000	11079000	17138000	19677000	15558000	23018000	17765000	19365000	20770000	13730000	21663000	14679000
0	1671100	0	0	2395100	0	2836900	1725700	0	0	637940	1503000	0	0	1179300	1682500	0	0	0	1461000	0	1430800	1372500	2208400	0	0	0	4758200	860830	1069300	938880	1557900	0	2492300	0	0	0	1647500	0	1110700	0	0	1460600	0	0	1543000	0	1983800	0	0
18042000	12000000	6379700	0	9786800	4913900	7652100	5891900	12394000	0	8279400	7560900	9532400	7582100	12373000	5791900	9469200	12131000	5493200	9979300	8109900	10024000	8568400	6137200	15287000	9188900	7063800	10636000	15929000	0	5899200	12203000	6118400	9316500	8127400	7671900	10081000	9375700	1061900	7320700	7971900	9771000	9485200	12347000	11857000	24568000	6075000	5579700	0	5994700
55540000	43997000	43455000	51496000	52443000	45556000	63303000	48350000	54928000	38718000	61580000	42775000	54075000	52628000	49829000	52121000	50513000	50493000	42670000	56700000	43576000	51060000	56228000	56101000	45444000	45854000	54574000	56116000	41421000	41987000	45791000	45578000	42677000	46982000	45596000	47781000	48481000	50911000	48074000	37782000	45266000	39391000	50967000	39247000	43504000	50304000	48794000	39923000	38232000	39621000
0	0	0	0	0	0	0	0	0	0	0	0	0	0	1746000	0	0	0	0	0	0	1890600	0	0	0	0	0	0	0	0	0	0	0	0	0	0	0	0	723510	0	0	0	0	0	0	0	0	0	0	0
0	0	0	0	0	0	0	0	0	0	0	0	0	0	0	0	0	0	0	0	0	0	0	0	0	0	0	0	0	0	0	0	0	0	0	0	0	0	0	0	0	0	0	0	0	0	0	0	0	0
1910400	3590200	4930300	3799200	2255400	0	4092300	4066300	1484700	2181900	0	0	3489600	0	2492600	4679500	2025900	0	4090100	0	1893300	0	0	2965800	1872400	3255000	0	5866000	1666500	0	3049700	4892400	3195300	2860500	3029200	0	1590500	0	2072800	5651500	2512600	3526800	0	0	0	4008300	0	0	2389200	4712500
99178000	78354000	89465000	112910000	78973000	77544000	90589000	76851000	76474000	74694000	80797000	64547000	117120000	72578000	94706000	112600000	124890000	56854000	57588000	86633000	101580000	60748000	58316000	86149000	102860000	66356000	67478000	101990000	87526000	98155000	79021000	94970000	106710000	73352000	64812000	94164000	91984000	54888000	61240000	67083000	74512000	60062000	69912000	81866000	80042000	86240000	76274000	97951000	11641000	75350000
0	2797200	2801800	2478500	0	4033400	2432000	2526000	4767100	2339700	2783200	0	2975800	3005900	2810400	3292800	3440300	3748700	0	3726900	5662300	3806700	2956200	2541000	3425400	2593400	7571900	3062200	4471100	3187400	5004900	1995400	1606200	5443800	1103600	3353000	3157900	3025800	4204600	2130500	4645700	2945100	2715800	3186800	4600800	3011700	0	2499300	0	4276600
6643400	5707900	10501000	8984100	10425000	7355100	15295000	5839600	5707800	8150700	7978300	8861200	8550000	11377000	7889000	8194600	8220600	7295800	9086000	11259000	8526900	8779400	8306500	8660100	8241600	6922600	8038900	8723200	0	5661700	9151200	9377200	6871900	8477200	5493400	12223000	8576800	13267000	5338800	13602000	4127900	5552100	10523000	8961600	5725500	8591000	11634000	7648000	4457900	17452000
17290000	19253000	20146000	18870000	24160000	22705000	23513000	16575000	25666000	18752000	17663000	20407000	22394000	18939000	20172000	20452000	20806000	19857000	16999000	17959000	21713000	16215000	20761000	19792000	20559000	18731000	19738000	19696000	17701000	14704000	18203000	14070000	19595000	18189000	18544000	13412000	24501000	13725000	12778000	15296000	24996000	17587000	24943000	19384000	19364000	23072000	32320000	17865000	26080000	18706000
13145000	14657000	13396000	8914000	10391000	12127000	12002000	9994900	12181000	10446000	8876900	10631000	14070000	9739700	11162000	14482000	11326000	9716400	10855000	9126800	10716000	16609000	14083000	9344000	10531000	9031400	10187000	8664600	14231000	9227100	9396700	9133000	14603000	12279000	10595000	7784800	15035000	11241000	11150000	7743200	12712000	11487000	11147000	8046000	10706000	13592000	11800000	9103000	13739000	21386000
0	0	0	0	0	0	0	3582900	0	0	0	0	0	0	0	4589600	0	0	0	0	0	0	0	0	0	0	0	0	2129300	0	0	2442500	0	0	2711100	0	0	0	0	0	0	0	0	0	0	2921500	0	0	0	0
157820000	253930000	149730000	135400000	147660000	201960000	133030000	156290000	156710000	152510000	135380000	141400000	162240000	187270000	166880000	172110000	175630000	205270000	144550000	163460000	209250000	189790000	153840000	171140000	171100000	176220000	158380000	169120000	181950000	128200000	148740000	164780000	147910000	164040000	187470000	130930000	136000000	174060000	165730000	115140000	160460000	200540000	159230000	144570000	159360000	172360000	156420000	148020000	245750000	226270000
1022600	0	0	0	0	0	1210300	1978400	0	0	0	0	0	0	0	1266900	0	0	0	1748500	0	0	0	2233500	1217600	0	1557200	0	1767800	0	0	1206500	1517600	3163900	1023400	0	0	0	0	0	2411900	1865200	0	0	1647500	0	0	0	2747100	0
2374600	0	0	1517300	1717600	0	0	0	0	0	2710400	0	1722100	2733300	2658800	2020400	0	1361800	0	0	3372800	2744200	0	0	0	0	0	2960500	2319200	0	0	0	0	3751900	1289100	0	0	0	995020	0	0	0	2451300	0	0	0	0	0	0	0
0	6006700	5436000	3931400	8103900	4301000	0	3580600	5631500	0	5264100	0	5299100	2583700	0	6477800	5505500	0	0	5798900	5657600	3168700	0	4532800	2306700	5066500	5109500	4402300	5806500	4179300	6239900	5787200	4572100	2518700	3635800	5697200	10159000	7078300	0	17677000	6739600	7808200	4804800	3679200	6539600	0	8118200	3732200	2562700	2532200
0	0	0	0	0	0	0	0	2515900	0	0	0	0	1356500	0	0	0	1219800	0	0	0	0	0	0	0	0	0	0	1052100	0	0	9113400	0	0	0	0	2150900	0	0	0	0	1650800	0	0	0	0	0	0	1698300	3065600
0	0	0	1384600	0	0	1496600	0	1814100	0	0	0	0	1852600	1575400	1173300	0	1783000	655490	1302200	0	0	1323900	1445500	3027200	1085200	2969700	1871000	2138800	2167000	985810	1648400	5992500	1988400	0	729740	4785400	2873800	0	1360300	0	3499100	3436500	1547500	1398300	1722900	0	0	0	1940000
188300000	224400000	224660000	264660000	241980000	238080000	234100000	198730000	205200000	182250000	229830000	204000000	224650000	263390000	217020000	256580000	320150016	196220000	145600000	198040000	355500000	234410000	224030000	217710000	233340000	268250000	219950000	231100000	213390000	264250000	194170000	246790000	197430000	186410000	163450000	149350000	339240000	223220000	231400000	239450000	159170000	197850000	214960000	217420000	244130000	226210000	235240000	259520000	174180000	131810000
1758700	2932600	2416200	0	1554100	0	0	0	1248300	1400200	0	0	1918400	1819200	3123300	0	0	2400700	1209500	1621900	2158300	1589200	0	2168400	988720	0	0	1372800	1052600	0	1710700	0	0	1605500	4216100	2936500	0	0	0	0	0	0	2981300	2530900	0	2620300	2310300	0	1904500	2362700
21230000	13906000	21085000	27013000	18932000	15447000	14037000	18519000	16484000	20694000	12023000	20364000	18936000	21385000	23203000	23062000	23775000	19997000	24169000	21917000	20734000	14917000	22207000	21994000	23166000	17848000	18927000	22816000	15905000	6421900	22607000	14288000	30525000	21360000	30670000	18266000	19885000	9409700	21620000	11161000	27440000	23767000	25245000	21740000	22552000	17904000	22497000	16548000	30610000	27280000
0	3370300	0	0	0	2237300	0	0	3878200	0	0	0	0	3398200	0	0	0	0	0	0	0	0	0	0	0	0	0	0	4327400	0	0	0	0	0	0	0	0	0	0	0	0	2442500	0	0	0	0	0	0	0	0
52456000	18748000	20045000	18888000	26711000	21683000	14372000	15861000	34812000	34375000	20127000	15346000	32478000	33614000	15608000	14580000	34664000	22610000	19703000	17827000	27686000	43757000	18531000	14859000	17123000	30201000	20139000	26659000	22356000	9426100	18684000	18288000	33554000	16946000	17801000	18756000	28704000	16424000	15993000	13921000	20286000	20058000	19356000	22533000	34622000	19066000	21172000	22852000	20199000	21819000
8465600	6774000	0	7447700	7748400	5507200	12528000	6427200	5944900	5618000	0	0	7027600	6757400	9449200	0	6014500	5833900	0	9656000	8504700	4798800	12940000	0	10624000	8011200	7542600	9258800	5875800	4118300	0	4597300	6990700	6827400	0	0	0	7365900	10117000	0	6634300	6038300	0	0	4422500	6807100	5469600	0	7754200	6386000
44441000	46825000	57509000	38328000	42466000	52123000	45252000	45095000	37383000	40975000	38684000	52985000	42781000	49150000	39659000	49542000	43464000	52423000	63240000	50008000	51066000	23328000	57906000	46875000	41571000	73008000	47112000	49890000	31323000	62894000	44688000	52629000	45553000	49514000	65718000	72575000	45920000	56251000	44261000	51942000	46693000	46018000	41017000	44759000	46871000	38944000	42861000	51744000	48949000	53952000
24562000	26767000	17180000	16440000	27885000	16177000	20688000	20989000	17688000	10315000	19545000	23177000	31195000	22816000	20799000	24761000	22675000	22550000	14844000	19550000	22121000	20804000	14607000	16983000	32819000	15994000	22492000	21329000	23653000	10485000	20959000	23801000	17974000	19440000	20769000	15707000	35627000	29079000	21488000	24198000	11656000	22518000	17669000	17014000	39148000	20196000	21163000	19249000	33540000	21386000
4478300	10242000	11786000	14253000	6708900	11163000	0	23437000	4925100	10358000	0	16289000	4470500	9487200	17869000	14092000	4806000	12637000	0	15108000	4862800	11603000	12042000	15461000	5700700	10551000	0	17988000	5442000	13878000	11084000	8693700	3954900	0	13605000	19103000	4533000	7463300	13870000	20016000	6673100	8769800	15244000	22102000	6214800	13397000	12783000	19283000	5770500	7006700
6257100	0	0	5343600	4067700	5321800	0	0	4351900	3525600	5888300	15255000	4871600	5152700	4752900	0	3693600	4383500	0	0	4858500	3306100	3978500	0	6615500	3059600	4470400	0	4297500	0	3346000	3960900	3806200	0	2408800	4718100	0	3351200	0	1933900	3691400	4231600	0	0	3768300	0	0	0	9350000	4918000
6022700	0	6565900	7215700	10180000	7168800	11149000	8607100	6415900	11465000	8275100	8999800	7590300	6279800	7519500	4817300	8892600	0	10019000	6431400	7837500	9196500	7504500	6761200	8599300	5129900	7512500	4842100	10995000	5608700	8281700	7254800	721410	0	4721000	0	0	8124900	5414700	5472800	6586700	8113200	6254900	9995500	5869000	0	0	0	0	10914000
64841000	28692000	58148000	31593000	46243000	44352000	61021000	59739000	43985000	48262000	40437000	56765000	45599000	62444000	79374000	59216000	53514000	61526000	54048000	71866000	54804000	70700000	67587000	63801000	62056000	64791000	53661000	54197000	48194000	66626000	60716000	51001000	48573000	48090000	58268000	43142000	49935000	40630000	63057000	51151000	49974000	36458000	55894000	60233000	64819000	32463000	55872000	86036000	31047000	52770000
15662000	10414000	11240000	33166000	14734000	12197000	7038400	10128000	10718000	10281000	21778000	23703000	14262000	8440500	15824000	10499000	10191000	11954000	9378700	12015000	14649000	17742000	7519500	10835000	15053000	31459000	11881000	9417600	11283000	11955000	7484100	15255000	24394000	8380800	7400300	4489200	55101000	8132800	13766000	0	10304000	9500400	15701000	7362300	14127000	7125800	18866000	9241200	31194000	13481000
5238600	12436000	7889800	6907500	8331200	9861800	7635100	8064500	7934400	17291000	12157000	6071200	8276100	9758400	6644800	13724000	4215600	5539800	11064000	13278000	7869000	7436700	5822200	11302000	7729800	10835000	7522300	8956300	11528000	8437300	9866400	14509000	10631000	13984000	8725200	7837200	8157200	12932000	9648700	11559000	14336000	21159000	10919000	11812000	4319700	4469200	7545100	7762600	0	5805700
4740700	2638800	4794900	4189000	2565300	2860100	3702400	4509200	3638700	2556900	3536600	4178400	1957300	0	3891500	4196600	1950000	0	4030700	5079200	2006800	2477800	3491100	5478800	2609800	2449300	3399600	3865800	2927500	3001600	3882900	4833500	0	2766500	4015800	6865500	2255500	3671800	4081000	6667000	1945900	3215200	4792000	6153100	2398500	3033100	3634100	8772600	0	3351400
92246000	93790000	80274000	68520000	83760000	94244000	71214000	69545000	82227000	76092000	76583000	82833000	76961000	81921000	84600000	72091000	87160000	64140000	95805000	75005000	86776000	81825000	65990000	82847000	99336000	85618000	83639000	77895000	68767000	69698000	72161000	70736000	79490000	78945000	65200000	70059000	63659000	75309000	65779000	57688000	86793000	69286000	77945000	65719000	54987000	70114000	67296000	59171000	86499000	125350000
0	0	0	0	0	0	0	0	0	0	0	0	0	0	0	0	0	0	0	0	0	0	0	0	0	0	0	0	0	0	0	0	0	0	0	0	0	0	0	0	0	0	0	0	0	0	0	0	0	0
0	1933000	0	0	0	0	0	0	0	0	0	0	0	2776800	0	0	0	1766400	0	0	0	1991900	0	0	1836000	2328800	0	0	1246500	2526700	0	0	0	0	0	0	0	0	0	0	0	5413900	0	0	0	0	1242800	1015800	2001800	5851900
43311000	37162000	34951000	48700000	27862000	21942000	43090000	23658000	26774000	28863000	31160000	27658000	24076000	25711000	25172000	23938000	34080000	48159000	23708000	33332000	25686000	18093000	18102000	27461000	36891000	37932000	24582000	38032000	35928000	34150000	28848000	25487000	49774000	46294000	40976000	31648000	31867000	33950000	23072000	35865000	37959000	72364000	46224000	35224000	41112000	25508000	22803000	28588000	56969000	42524000
6391200	14358000	14073000	9688800	3559800	8869500	8170200	9199000	15007000	18405000	23889000	43868000	11071000	13269000	9754100	9870200	11972000	10623000	10067000	14081000	11865000	12192000	9072800	10772000	10962000	14337000	15173000	14833000	17702000	11925000	13156000	16425000	10167000	18569000	17984000	11890000	9252200	20232000	11703000	10286000	21308000	25144000	21096000	13553000	6113000	10633000	19315000	13007000	144580000	122070000
4191200	0	2672800	1692000	5216200	2305100	2351200	1688600	0	2599400	4308600	2690000	9238100	3553700	2419800	1946800	3752500	2273800	3017600	2907100	2993800	2685500	4056800	0	4065600	6355800	2487400	2330300	0	1633900	3585000	2089800	6394800	2868700	2333700	1273200	2578200	0	2160500	2051100	4340600	5296800	0	3906700	4035200	5008800	2333500	1952800	2802300	10407000
0	0	3817800	4189300	3477300	2939100	3383200	6367900	7535700	5472600	3260400	8872700	1732800	2456800	1851200	3742900	2120200	1827000	3134900	5598800	2937000	2928100	2896600	4914200	4247100	2540600	3651900	4046900	4581800	2158400	4915400	4772500	2358500	3393500	3033300	4006700	0	4323700	4119500	3196400	2930900	3038300	4841800	0	3181100	5788500	3019900	0	0	3314000
4180000	0	3121400	2390600	0	0	0	2551400	3523500	0	0	0	0	0	0	2646900	1801800	0	0	0	2906600	0	2717700	1952900	3575500	0	0	0	2469100	2152100	4738600	2821500	0	0	0	0	4528000	5406200	3058300	0	0	0	0	0	3821300	2077500	0	0	0	0
33108000	28673000	41128000	32376000	26854000	35950000	29607000	49685000	26209000	24225000	15076000	24658000	28141000	38126000	30429000	45652000	25402000	38141000	34269000	33920000	33094000	54521000	29762000	42855000	44195000	29080000	31039000	28904000	20270000	37751000	27725000	36429000	41242000	19513000	26468000	30654000	39724000	32437000	40967000	29357000	41074000	39761000	34939000	30226000	37668000	38367000	48071000	45311000	27410000	14557000
0	0	0	0	0	2754100	0	0	0	0	2691000	0	0	4374500	0	2421800	3850300	0	0	0	0	3440700	1836400	2352000	0	0	0	0	0	0	2457200	0	0	0	0	0	0	2120000	0	0	0	0	0	0	0	0	0	0	0	0
175520000	230530000	167330000	173830000	372049984	171550000	153180000	151200000	180250000	142030000	146570000	192470000	202520000	226610000	198150000	201450000	225360000	208130000	298340000	194510000	252400000	199370000	176270000	193450000	257380000	163980000	167510000	185370000	248880000	152310000	209810000	216050000	183040000	250140000	166660000	193110000	187920000	215300000	167260000	204360000	152410000	216660000	162980000	161120000	135030000	206320000	209500000	196130000	229190000	239830000
0	0	0	1549900	0	2160600	1740300	0	0	2001100	0	0	1818500	3170400	2303700	0	0	0	0	0	0	2413200	3052700	3748900	2027300	1723600	0	2060700	2676300	2355900	2332200	0	0	1656700	0	0	0	0	1854600	0	0	0	5763100	0	0	0	0	1810300	0	0
18661000	24702000	21036000	19326000	16098000	22637000	21675000	18408000	17333000	18269000	22965000	11473000	22500000	22324000	24187000	23071000	10442000	14492000	20148000	15544000	17670000	21821000	17585000	19596000	13878000	21406000	13314000	16568000	19310000	24610000	24049000	17839000	16340000	19241000	19674000	20481000	23586000	18674000	25324000	31250000	15103000	16869000	18560000	21072000	21316000	21840000	33372000	29219000	16465000	9441200
5854800	4079300	9940300	5134900	6685100	6235700	0	4836000	6910200	9172200	4705000	7054400	6174600	5819700	0	5150600	7199200	6443400	0	6146300	8232400	0	10688000	5791500	10183000	0	6122000	0	8515100	5335300	10438000	8420300	7778100	0	9344000	16454000	5922400	5782400	0	0	10027000	6757500	9514800	0	7623300	0	9027500	0	5432000	6214800
8637600	10258000	4317300	1775000	3402500	6108400	3646600	0	3049100	6802700	0	2486600	0	1971400	1917900	3729400	0	4225500	0	4092200	21393000	0	0	3103900	5515700	0	3882500	15545000	2933000	19595000	2917200	0	5370400	4035400	0	0	5010100	0	3929000	0	0	2806000	4431800	0	5845800	7612100	3650600	0	3161600	0
0	0	0	0	0	0	0	0	0	0	0	0	0	0	0	0	0	0	0	0	0	0	0	3028100	0	0	0	0	0	0	0	0	0	0	0	991720	0	0	0	0	0	0	0	0	0	0	2206000	0	0	0
5068800	3324400	3507800	5774200	0	1927700	1846900	4432000	3858100	2591100	3583100	0	2952300	2724300	2872500	4215800	4430600	2923500	2894400	0	3588100	3079700	2087500	4015700	2327100	3463500	2555800	5813700	2803900	1421700	7692900	4452000	2395200	3070500	2761000	1458800	2818500	2825600	1962600	0	5689300	4538900	4050500	4018900	6372400	2387200	2489300	0	0	3693100
0	0	0	0	0	0	0	0	0	0	0	0	0	802870	0	0	0	653370	0	0	0	961010	1381400	0	0	0	2355200	0	932220	0	0	1426200	0	729210	0	0	0	1478800	0	0	0	0	0	0	0	0	516380	0	0	2081500
0	4200200	2742300	6505900	4326700	4569300	0	4779100	0	0	0	4131200	6599400	4478600	0	4779300	0	5143300	4861900	3676200	3884800	3527100	4294900	4531600	2869000	2860300	7402100	4503300	3804400	0	5139600	11380000	3336300	3166900	4160600	3585900	5018700	1466500	3435900	0	4636700	0	0	3888100	3249500	0	6846100	8115900	0	0
3208800	0	11251000	0	3484400	0	0	0	0	7753800	0	5846200	0	0	4487600	0	4150000	1834000	0	4948500	0	0	5594700	0	7156000	0	2305100	2509800	0	0	0	2976700	3703500	3965700	0	0	2942900	0	0	0	5190300	5097200	0	0	4422400	0	0	0	4634400	7717000
0	0	0	0	2129500	0	0	0	0	0	0	0	2012500	2453100	0	0	0	0	0	0	3259900	0	0	0	3835800	0	0	0	0	0	0	0	0	0	0	0	0	0	0	0	0	2231300	0	0	0	0	0	0	0	0
3413100	2104500	2962100	0	3071400	3344300	1919600	0	2438300	0	0	0	3058800	0	1807800	0	2550500	3444400	0	0	0	3906300	2885900	2497200	1991400	2331000	0	2609900	0	2521700	8659500	0	0	2509900	4679900	2147100	2382600	4454000	2494400	3675500	5212300	3524300	0	0	2713000	4414500	2766900	0	0	3444200
1071400	0	1423400	1602700	1048900	0	0	0	0	0	1695400	0	1746300	0	0	0	0	0	1432600	1152600	0	1535700	1780200	0	1715100	0	1494800	0	2282800	0	2170500	1250400	0	1639300	0	0	1115700	968740	1548200	0	0	0	1201800	0	0	1716100	1239200	0	0	0
0	0	0	0	0	0	0	3053300	0	2624500	0	0	1463400	0	0	0	0	0	2579200	1993200	0	0	0	0	0	0	2509800	0	2005100	0	1355100	0	0	2292700	0	0	0	0	0	0	0	0	0	0	1856000	0	0	0	0	0
0	0	0	3253100	1029400	0	0	0	0	2382800	0	0	790350	0	0	0	0	0	0	2074100	0	0	0	2130900	0	0	1020200	0	0	0	0	0	0	0	0	0	0	0	0	0	0	0	0	0	0	0	0	0	0	0
17905000	20045000	19737000	30524000	26797000	18557000	17748000	28173000	38118000	32439000	29098000	28015000	23455000	37388000	35702000	18772000	21625000	20328000	30729000	39341000	0	26846000	23798000	24682000	26314000	26855000	30245000	29159000	22719000	25346000	27369000	22616000	20481000	36044000	25408000	25172000	19699000	26318000	25203000	21207000	30574000	4555500	24080000	16984000	24504000	20163000	20882000	29738000	14483000	0
34699000	41521000	34037000	41405000	39024000	44584000	31362000	26502000	42241000	41864000	35698000	34857000	55676000	52938000	37344000	46306000	52766000	22780000	39769000	36469000	37053000	53639000	26151000	42606000	49002000	46545000	36988000	42238000	51573000	37951000	22132000	43345000	50363000	47920000	54156000	50748000	39820000	33328000	29671000	34268000	35282000	60112000	35959000	42006000	57107000	35685000	39419000	41032000	34665000	37640000
0	0	0	0	0	0	0	0	0	0	0	0	0	0	0	0	0	0	0	0	0	0	0	0	0	2759300	0	0	0	0	0	0	0	0	0	1291600	0	0	0	0	0	0	0	0	0	0	0	0	0	0
9024800	11869000	10429000	13585000	10265000	17564000	14325000	16649000	12493000	15819000	19687000	13921000	14824000	14938000	15098000	16919000	17204000	16904000	17916000	16376000	16167000	9661100	12841000	20383000	11058000	9952900	14622000	16108000	12051000	12093000	13198000	17122000	10082000	12033000	14143000	15426000	11971000	11751000	10593000	11125000	22879000	10700000	11547000	13034000	9900300	10326000	9009500	9803200	4097300	6911300
3637700	6831200	0	0	5168600	5287600	0	0	6079200	5399400	0	4684900	0	4979400	6034000	4950600	5832400	6001800	0	0	5338100	3420000	0	5464300	4983900	5247700	4075900	964330	3424700	0	5502600	4901900	3768600	0	5338700	0	3289100	5583600	0	4542300	0	3027300	3970700	3995600	12880000	6516100	4782900	0	0	0
10942000	14771000	8779300	16982000	11326000	22968000	16977000	23856000	15063000	11430000	13147000	17906000	15542000	12197000	10349000	19209000	12564000	13738000	19877000	10422000	14850000	10649000	19368000	17920000	19005000	8418300	10726000	11311000	7831500	16045000	8212600	5658400	14033000	13614000	0	10631000	13598000	11067000	19070000	7815400	8452700	14315000	10433000	8070100	11920000	20294000	13566000	13721000	13672000	9391800
0	0	18388000	21008000	0	0	17325000	14375000	0	17371000	12446000	16180000	35553000	0	21060000	21207000	0	22516000	24507000	17667000	0	0	32276000	14981000	0	23345000	17376000	21916000	0	31783000	13286000	21878000	18094000	0	13966000	16848000	22318000	0	16567000	17548000	0	0	16334000	13994000	0	0	19473000	13419000	14923000	0
0	0	6620900	7121500	5349700	4084900	0	4480900	3456000	1732100	8536000	4351500	2618900	0	0	3357700	2959900	0	0	3821800	3086000	0	3212700	3341200	0	0	3788700	1906600	2488700	1703200	3131000	4457500	3969200	2852500	0	0	3446400	5777400	4224400	0	8417300	5794100	5208800	4273100	0	0	7962700	0	0	8180500
7371200	0	0	0	0	0	0	0	0	0	0	0	0	0	0	0	0	0	0	0	1644100	0	0	0	9197600	0	0	0	0	0	0	0	0	0	0	0	0	0	0	0	3272200	0	0	0	0	0	0	0	0	0
786430016	818889984	718870016	830120000	986840000	921699968	846600000	827240000	636510016	788960000	864590016	850220032	1169699968	778150016	923000000	895000000	930350016	697360000	765859968	831040000	770609984	726350016	765209984	704270016	748969984	668380032	709350016	724179968	825590016	683680000	745750016	754800000	897590016	797769984	685280000	702209984	1047699968	747080000	889299968	679180032	1004000000	861270016	704339968	696209984	963680000	801080000	747889984	562649984	857790016	781280000
0	0	0	0	0	14619000	6910900	13266000	0	5515200	6634700	12126000	0	7606300	5911100	0	0	12699000	8842100	6272700	0	6352300	6359400	8047100	0	9016200	6383300	4847800	0	4104600	5900800	5179800	0	10230000	0	4985900	0	0	0	3717600	0	0	0	2867600	0	0	0	0	0	0
5411200	6605600	8382200	7698600	6470600	8376200	9917100	3116300	9472300	2094300	6300300	6022800	7088600	8140400	10779000	10046000	9937300	15245000	12254000	11406000	3555200	11113000	4397200	6787800	4423800	7335700	5331300	9542100	6291300	5145700	6990700	6484400	15543000	17504000	15819000	12883000	6022100	10604000	8251300	2978700	11368000	3298000	11252000	8030800	6094400	5903200	2694600	4086900	39429000	25533000
12800000	0	4233100	0	0	0	6328100	6194100	6219000	3075500	0	0	0	0	3505600	5649100	0	3780200	3963700	5436600	0	0	2963500	3832700	0	0	6082400	3691300	5163200	4989200	7662200	12713000	0	9713000	4029400	6892200	0	0	14335000	13774000	0	0	0	0	0	6263300	3156600	0	6281900	0
0	0	0	0	0	0	0	0	0	0	0	0	0	0	0	0	0	0	0	0	0	0	0	0	0	0	0	369410	0	0	0	0	0	0	0	518710	0	0	0	0	0	0	0	0	0	0	0	0	0	0
88772000	149820000	73345000	95551000	92144000	101050000	119940000	111980000	90484000	115390000	107110000	93378000	85431000	124290000	92866000	111590000	92289000	123680000	113850000	117390000	87799000	88799000	89632000	92676000	91105000	77442000	91501000	113340000	98017000	85060000	77821000	82311000	93799000	112200000	98346000	96219000	89874000	103130000	101910000	129170000	82489000	119440000	94358000	119270000	104190000	80428000	116050000	158410000	69930000	68065000
45458000	53489000	88482000	61702000	40515000	84213000	39192000	113880000	84055000	49596000	63340000	25135000	74488000	38250000	82049000	20274000	95204000	57102000	30189000	19013000	44822000	88376000	51402000	22968000	46054000	51337000	38029000	49142000	33871000	157210000	38565000	35100000	54747000	37549000	38693000	29086000	44687000	87918000	50240000	26251000	130720000	40337000	46817000	24684000	34665000	53471000	31524000	77906000	53218000	0
12086000	13421000	11592000	14092000	19596000	15183000	22708000	16756000	13833000	14311000	33066000	37364000	13691000	15189000	16826000	7257000	16843000	12832000	14527000	9487000	17466000	13555000	14229000	17240000	14940000	13512000	15719000	15541000	16343000	14890000	14339000	7779700	11442000	13750000	12424000	19499000	11082000	11236000	8604500	16071000	12685000	16367000	18375000	19072000	16869000	14002000	29613000	14783000	10271000	8578400
2854400	0	3736500	0	3635800	0	3146800	5624000	2092300	0	0	3362200	3297600	0	0	0	2858900	0	0	4736100	3318900	12386000	3069300	3771600	3112800	5731800	3365900	11256000	5146200	8203000	12640000	3455000	4444200	4978400	5063900	0	4673100	3591900	5382900	0	3288100	0	0	0	3952700	3577600	0	0	5959300	2946700
133340000	98004000	113440000	172610000	139210000	123490000	130300000	152340000	108000000	117000000	137480000	158170000	120900000	113400000	132130000	176340000	105130000	138740000	145110000	167750000	107360000	143510000	130410000	176500000	164910000	125300000	174720000	152210000	130290000	154150000	171530000	142330000	163980000	129410000	113910000	158670000	50775000	101980000	123680000	102090000	112230000	116380000	109480000	101250000	120880000	126690000	114060000	152470000	61505000	150740000
149270000	189450000	238350000	226050000	156860000	275240000	170910000	224030000	204890000	190490000	172050000	179430000	181700000	202070000	253780000	203510000	163190000	170640000	200830000	201180000	186370000	204000000	202990000	184890000	189880000	203740000	215760000	206640000	222540000	232390000	245560000	209560000	161980000	137470000	178100000	259960000	164840000	156690000	224250000	153150000	156330000	232850000	188720000	261790000	213330000	182190000	228840000	206680000	169860000	172890000
4105100	7709700	5278600	0	0	0	0	0	0	10612000	0	7801000	6222900	0	9700600	0	0	0	0	0	0	7159400	0	0	7179400	0	0	53138	4494300	0	5797500	5620000	0	0	7185800	0	3449400	0	5739900	8818400	3048800	2792800	0	0	0	5809700	7176800	0	0	0
166290000	146420000	148650000	126530000	139700000	148880000	130760000	116760000	131690000	137800000	145060000	134360000	163180000	136250000	124690000	135770000	139370000	136930000	121490000	125520000	160160000	141230000	145220000	127320000	147460000	205920000	146450000	137760000	144750000	150640000	144020000	138900000	146170000	157780000	112690000	105100000	143950000	141690000	135930000	116320000	150480000	147120000	122760000	119350000	134270000	161430000	157180000	130460000	158930000	155660000
14864000	18939000	19764000	19329000	23414000	18758000	20425000	24700000	17319000	27197000	21873000	18240000	27038000	24006000	23589000	23250000	25319000	23252000	20379000	24006000	23186000	20756000	21141000	24752000	28384000	21831000	26679000	23166000	18229000	14839000	27712000	21894000	22385000	20608000	19057000	17072000	22592000	19792000	20697000	15091000	17896000	16467000	21317000	18627000	21423000	15044000	19455000	20177000	26664000	14926000
52124000	53198000	41010000	33405000	42922000	32534000	16881000	29967000	37665000	33994000	27311000	22115000	39328000	42518000	50595000	34965000	36645000	33928000	36844000	25727000	35360000	46627000	42312000	31790000	41421000	36747000	27622000	40027000	55941000	45793000	23595000	34012000	47439000	46674000	25976000	33245000	85741000	38820000	37664000	29407000	46151000	46228000	43081000	28757000	52773000	38970000	41736000	33002000	36079000	30707000
0	6766800	0	8978900	0	9846600	7950800	8668200	0	22163000	8068900	9740600	0	11564000	9230300	8309300	7822500	11369000	7460100	7791700	10907000	11411000	9611900	8206100	10235000	8989800	7445100	8977700	0	0	6514800	9212700	11242000	5408400	10967000	10792000	8347900	4886100	6580900	9968600	9483600	0	7691800	3935400	10040000	3143800	9268600	6728400	5028900	0
21633000	44890000	59785000	31803000	27542000	64825000	0	0	19224000	41860000	52048000	22597000	88648000	38589000	107420000	59550000	23409000	100160000	30535000	61489000	25162000	48692000	72089000	38638000	0	62322000	37331000	27695000	42714000	60995000	53290000	23644000	22752000	77894000	0	20057000	32416000	63161000	14282000	36566000	189090000	40142000	42595000	0	26982000	40602000	79172000	47632000	33203000	80096000
142200000	112630000	103950000	116140000	139830000	131790000	113680000	103850000	132480000	110730000	119430000	115340000	107810000	102280000	88720000	110840000	120810000	111050000	111280000	105000000	133480000	108000000	111460000	127720000	123550000	125040000	113540000	103630000	115360000	113380000	104140000	107770000	113070000	123470000	93816000	81009000	108270000	98991000	113800000	65930000	149240000	125960000	107500000	94104000	120330000	131810000	120560000	101060000	150670000	139540000
6231400	0	0	0	0	0	0	0	0	0	0	0	0	0	0	0	0	0	0	0	8871400	13891000	0	0	6018200	0	0	0	6911600	5454700	0	0	7482600	0	0	0	4986200	0	0	0	6522600	0	0	0	5815300	5555300	0	0	9131400	6697100
24891000	28570000	31039000	20789000	27952000	27375000	21688000	22985000	22829000	22092000	26870000	23433000	27642000	23487000	29839000	20405000	17944000	25374000	21672000	21649000	22070000	22242000	26273000	27151000	30364000	24892000	22812000	21532000	32914000	25290000	19878000	22353000	17027000	20197000	32356000	22230000	23940000	18439000	29176000	25266000	14113000	18255000	20318000	21538000	32984000	21061000	27142000	19668000	25831000	27045000
4280400	4041700	8883100	4898200	7541400	5513200	5152300	7962000	6013200	7972300	5599700	0	3833200	5905300	7164300	4784200	17660000	4914200	7762700	2377000	16401000	6469900	13293000	5850200	8179200	2613600	4427800	4910500	4199100	4671500	11847000	13181000	5588200	4245200	8066600	12350000	6988500	6022000	5054600	7458800	4541400	5350700	7268800	8819300	3102600	5257800	2695200	2796100	7799400	3903800
4254900	0	0	0	3523200	0	0	3844100	0	3261900	4240600	0	6189900	8238300	3929900	0	20294000	4431900	0	0	0	0	0	3955800	8356900	0	0	0	0	0	0	0	5273100	0	0	0	3942000	0	4049200	0	4829800	0	0	0	5148900	0	6973200	0	0	0
200510000	200590000	173690000	180300000	185280000	209890000	185970000	194380000	205650000	242170000	257900000	234600000	209340000	175020000	184530000	215030000	246340000	205370000	222400000	269950016	203220000	185970000	232600000	211820000	232600000	249730000	197050000	226450000	211790000	203110000	229970000	225580000	186720000	185580000	193130000	184400000	179810000	227620000	174500000	170100000	185910000	184260000	189160000	194520000	198170000	202580000	224580000	242180000	146730000	152530000
0	0	0	0	0	0	0	0	0	0	0	0	0	0	0	0	0	0	0	0	0	0	0	0	3703400	0	0	0	0	0	0	0	4395700	0	0	0	3632600	0	0	0	6696800	0	0	0	0	0	0	0	0	0
0	2148900	0	0	0	0	0	0	0	0	0	0	0	0	0	0	0	0	0	0	0	0	0	0	0	0	0	0	0	0	0	0	0	0	0	0	0	0	0	0	0	0	0	0	0	1948400	0	0	0	0
15541000	13381000	15624000	10101000	11537000	9914500	9088100	10334000	9193100	12398000	9742600	10609000	12614000	10978000	8004800	9594400	19572000	8626600	9007900	8057300	14495000	9604800	14187000	11037000	17588000	9835800	12899000	9046800	10058000	14266000	9743900	10736000	11571000	10392000	10521000	6912700	12993000	10529000	13869000	7738400	14078000	13222000	10635000	8917400	9073400	10980000	13336000	9710200	23588000	12915000
0	0	0	0	2250300	0	0	0	0	0	0	0	2270100	0	0	0	0	0	0	0	0	0	0	0	0	0	0	0	0	0	0	0	0	0	0	0	1574800	0	4284400	0	0	0	0	0	3568200	0	0	0	1728500	0
31667000	26871000	39139000	25114000	30781000	40387000	26341000	25667000	40659000	29487000	18227000	28055000	45101000	45445000	26812000	21922000	38615000	26587000	22780000	28170000	133550000	35029000	31167000	23160000	27790000	33784000	26496000	29783000	20696000	20519000	21460000	0	23595000	33628000	19290000	0	27777000	30638000	14575000	22580000	32820000	40271000	26688000	26954000	44213000	23560000	21583000	18211000	16763000	21039000
4132900	3405300	7503600	3813100	7531600	4829600	8046600	3254700	4232000	6955600	15080000	5659600	0	6551200	5208000	0	5489500	5340300	15518000	7071400	4439500	7512600	0	3635900	4420600	3272700	6273100	4895600	3884200	0	4031700	7272000	4438200	5069900	4637400	11683000	0	7385800	5146900	0	3814400	4217300	0	0	0	5873900	2800000	0	0	3377300
0	0	3232300	0	3818800	0	0	0	0	0	3247900	0	2600600	0	0	3330800	2468600	936330	0	2397200	0	0	8751500	703140	0	0	0	3938900	6250900	0	3066400	0	0	0	20023000	0	0	0	0	2234200	3443900	0	5583500	0	0	0	0	0	0	2812800
85073000	101270000	80262000	76425000	94861000	88293000	83282000	102100000	75800000	94749000	89189000	86149000	94892000	94523000	72526000	104830000	107600000	94499000	91667000	94115000	84513000	86139000	83377000	87017000	116740000	93308000	109270000	90273000	101270000	98689000	90892000	101790000	139560000	140940000	88392000	82108000	96861000	116580000	78864000	72469000	95742000	101800000	86635000	101120000	148910000	100940000	105560000	93427000	84427000	92902000
0	0	0	992860	0	0	0	0	0	0	0	0	0	0	0	0	0	0	0	0	0	0	0	0	1362800	0	0	0	1022900	0	0	1796900	0	0	0	0	0	0	0	0	0	0	3585000	0	0	0	0	0	0	0
2274000	0	2602800	0	1920200	0	0	0	2511800	0	0	0	1655800	3002200	0	3723800	2243900	7516300	0	0	2852900	3299500	0	0	2705300	4047100	2431000	0	3066000	1573500	1784700	0	1671700	1596700	1858700	0	2052400	2289800	4268700	0	4777500	3352800	2365900	1190600	2537400	2756400	0	0	0	2239900
2656600	0	0	0	0	0	0	1467900	0	1674400	0	0	0	2369800	0	0	0	0	0	3096200	0	0	0	0	1914800	0	0	0	3075400	2632300	0	1652900	0	0	0	0	0	0	1962700	0	0	1854500	2735400	0	0	0	0	0	0	4179600
0	0	0	1323700	0	4547900	0	0	0	0	0	2763200	1534900	1637600	0	6510700	2455300	0	0	0	1774500	0	0	0	1795400	1198900	1340900	1737800	1046200	0	0	1108300	0	3205600	2462900	1980100	0	1819800	0	0	0	0	1761600	0	0	2553800	1988400	0	0	4570600
12725000	18797000	26677000	16661000	15394000	28521000	20433000	26623000	26924000	21187000	19290000	19656000	22891000	32840000	30197000	22754000	16576000	14332000	20987000	21122000	26369000	12052000	17900000	17851000	20932000	21353000	16341000	17438000	19942000	16044000	20368000	30416000	17193000	23641000	19293000	21782000	14147000	38735000	32074000	29484000	9698300	18683000	20598000	23155000	22408000	28391000	38706000	25575000	15724000	13827000
0	1449600	0	0	0	2379900	0	0	0	0	0	0	0	0	1610400	0	0	0	0	0	2220700	825400	1453100	0	0	0	0	0	0	0	0	0	0	0	0	0	858740	0	0	495910	0	0	687740	0	0	0	0	0	0	0
0	0	0	0	12050000	19296000	0	0	5753800	11006000	15060000	20201000	6363700	0	18110000	0	14304000	16925000	23196000	19860000	0	9355500	11994000	0	0	0	0	14955000	0	9248800	11028000	0	15698000	0	0	0	13051000	20879000	7325000	0	0	0	22357000	0	14591000	0	0	29676000	0	0
14497000	17330000	12600000	15820000	11197000	8888500	0	13616000	0	15362000	18338000	13072000	20138000	10323000	16576000	15938000	9556700	10312000	11959000	14713000	9792100	0	9556800	13981000	18464000	23814000	16808000	16224000	2382900	12150000	17343000	16001000	0	0	12125000	10979000	11357000	0	8367700	8606800	19797000	20460000	9658600	10799000	22673000	10864000	14655000	8904700	15011000	12709000
0	0	0	0	1916200	0	0	0	0	0	0	0	0	0	850770	0	0	0	1162300	0	779190	1412500	0	0	0	0	0	0	945440	0	0	1388400	1003000	0	1381000	0	0	1334200	0	0	1150300	0	935160	0	1977800	0	0	0	0	0
10060000	0	2356100	2221900	4584400	3207200	2227700	2988200	4108200	1957600	2986800	2040200	0	6091100	1734400	2932200	0	2357200	5737500	5169600	0	0	2298000	2271800	0	4635300	3483900	2295900	4248200	3350800	3021600	0	0	4169100	3238200	1953900	4729100	3302900	2804900	3589500	8018500	3405800	3374400	2717500	5366500	4200300	5610400	2439800	4053700	0
3582000	0	2459200	0	0	3936100	5144200	0	0	0	0	0	0	0	4000800	0	0	0	0	0	0	5999400	6852000	0	0	0	3477200	0	0	5459500	7335000	2882400	0	0	3278000	0	0	0	4316700	0	3351500	0	5106500	0	0	0	6020200	3079900	0	0
0	0	0	0	0	0	0	0	0	0	0	0	0	0	0	0	0	0	0	0	0	0	0	0	0	0	0	0	0	0	0	0	0	3609400	0	0	0	0	0	0	0	0	0	0	0	0	0	0	0	0
0	0	0	4945800	0	8867600	0	0	3832300	0	0	0	0	0	7005300	0	0	3131900	0	4918800	0	0	0	0	0	0	0	0	0	0	7504100	0	0	0	4449700	0	3723300	0	3988600	8082500	0	0	0	0	0	0	0	0	5044300	0
10024000	16800000	9075000	7968900	8409000	8680900	8344300	0	9615200	25471000	7901200	8763700	10806000	12385000	8224100	18733000	11469000	10870000	13158000	11408000	10362000	8829400	9378900	7917300	10741000	7325500	15635000	12269000	8253900	8586600	13248000	12285000	8736800	23044000	10413000	7025700	7668400	10637000	9918400	0	9057400	9822200	16256000	15969000	11740000	4871100	14727000	0	9574700	11344000
2261200	0	0	0	0	0	0	2599300	0	5451300	3951400	5135200	0	0	0	0	0	0	2893800	2057500	5692200	0	6510300	4413900	2159400	1658500	0	0	4756500	0	0	2734300	4128500	4165700	7056700	5196900	0	0	5409500	3540600	0	0	4262400	0	0	0	0	0	6116200	1782800
46088000	50778000	58776000	69194000	50566000	61635000	51595000	63615000	59223000	73536000	79936000	80875000	46332000	57063000	56685000	64836000	50538000	49706000	76837000	74921000	71075000	62775000	60513000	90083000	59575000	45061000	67913000	63501000	63916000	98744000	75998000	71930000	51905000	62602000	73302000	65062000	61479000	57404000	59554000	71625000	69261000	67149000	75427000	78570000	47880000	55808000	56831000	75667000	43685000	54195000
81753000	130540000	117640000	120980000	148530000	99484000	133930000	117790000	73324000	67990000	59973000	55919000	76900000	95060000	65602000	123510000	78029000	95379000	156210000	123030000	112040000	77061000	121090000	138340000	123230000	84991000	90330000	114130000	86281000	101580000	109930000	145710000	102250000	81534000	96884000	137460000	91887000	127150000	135440000	115900000	79545000	101880000	108920000	84481000	92303000	142340000	112310000	139180000	76825000	87000000
54998000	46136000	39353000	76236000	53742000	20411000	64913000	135620000	0	43138000	67215000	60037000	83287000	69507000	56467000	74366000	124290000	36146000	59544000	76473000	48998000	64815000	63437000	77994000	43088000	72764000	75503000	93429000	68662000	113880000	39744000	110300000	59873000	29554000	38451000	47253000	46265000	28290000	32840000	35855000	46502000	39827000	88351000	0	34843000	39829000	42132000	27461000	96542000	56197000
8019900	15387000	9706700	8674600	9031200	9664400	11724000	10903000	11832000	14602000	9457800	14123000	11931000	19492000	9329900	12076000	9264100	12771000	24266000	14468000	12279000	23410000	11823000	11069000	13420000	14371000	9817700	14127000	9739300	8766300	8844900	9967500	10745000	0	7357900	12122000	6676800	9048000	9539300	11472000	8292600	18832000	8389400	16149000	11313000	10647000	9692600	8158500	18555000	11924000
105710000	89062000	139960000	515569984	137570000	107020000	268120000	389420000	56911000	132070000	90998000	208590000	29960000	52808000	162490000	490929984	73524000	145530000	89038000	285520000	69874000	149510000	189640000	374329984	74548000	268090000	280680000	290190016	88107000	255200000	193430000	294600000	95063000	74319000	73164000	229180000	49589000	119450000	84082000	245940000	53373000	92876000	92367000	212490000	56405000	65127000	254650000	536540000	95702000	50201000
1814100	0	0	5341500	1341800	3016000	0	0	1530300	9342100	7092200	2100000	0	6126000	9343400	3568300	1084100	6772300	3509100	0	1527100	3559600	4676900	6702400	3366200	6009500	6094300	3783000	8563400	0	0	8253800	3374300	5598800	0	0	1157900	5411500	2676000	5120800	2496600	5077900	5141900	0	2176100	7626500	4581700	0	4292800	5288700
0	6142400	0	0	2918600	2705600	0	0	0	0	0	0	3106300	0	0	0	4965200	3378900	0	0	7614700	4832700	0	0	3598300	2470900	0	0	0	0	1735800	0	0	2841500	0	0	0	0	2836200	0	0	2947800	0	0	0	0	0	0	0	0
8057100	0	7827400	7074300	7993200	0	4923500	5936600	8099700	8782700	4964500	8803800	5739400	0	0	6281000	6244700	4539600	13745000	7191000	10497000	0	7622300	8928000	9281600	0	8768400	7279700	15427000	10521000	6673600	6127900	7252100	9030800	6376900	7004000	7097800	13272000	8126500	8973200	12751000	10254000	18064000	7717400	16642000	11298000	4509800	9827500	8727600	7814400
19051000	18291000	25468000	20001000	16653000	21476000	18593000	22679000	12496000	12768000	14784000	19321000	20076000	26705000	19479000	17412000	20739000	21340000	21364000	25296000	19173000	21311000	20612000	18740000	30425000	20508000	19000000	21981000	20252000	20810000	22237000	23420000	17003000	20752000	23975000	20894000	19101000	22728000	25549000	17688000	18684000	12580000	18358000	24552000	15609000	19000000	20483000	8770800	17384000	23135000
0	0	1612700	2277700	3133900	0	2196500	5308700	5609300	2759800	0	6326700	10796000	4151300	2471300	2895900	2572900	0	0	6902500	4858700	1883800	3141400	8254600	1829900	891080	1306700	3806500	2643000	0	0	3913000	0	0	1834800	2673900	0	0	0	0	0	1148000	1437300	0	0	0	4457700	7487300	0	0
0	0	11315000	12274000	8758900	8047900	22252000	14699000	18809000	13421000	13348000	13781000	17792000	15478000	0	13004000	10072000	13934000	39661000	14411000	10685000	13865000	12845000	24142000	0	6530200	13472000	0	7640900	8938100	12568000	0	79044000	0	4916100	13642000	0	0	10982000	0	17773000	0	14310000	8090800	0	0	25964000	0	0	14082000
167160000	159510000	195610000	195240000	156900000	169230000	188590000	172820000	195710000	195180000	123150000	153340000	176480000	233730000	205320000	188950000	165770000	208930000	214570000	151990000	170930000	233620000	173340000	180590000	172880000	190820000	200650000	160550000	207010000	196040000	190790000	195440000	183490000	196900000	167860000	167070000	155240000	159290000	151050000	165800000	151560000	154810000	156000000	149870000	171710000	121590000	186990000	163610000	148460000	106010000
0	0	0	0	0	0	0	0	0	0	0	0	0	0	0	0	0	0	0	0	0	0	0	0	0	0	0	0	0	0	0	0	0	0	0	0	0	0	0	0	0	0	0	0	1756600	0	0	0	0	0
1423100	0	3997000	1799000	0	0	0	3247900	0	0	0	1313800	2154300	0	1382300	0	0	0	0	510030	0	1546600	1432900	0	0	1592500	1251300	375180	1393500	1486800	2018300	4633700	0	0	1820200	0	0	0	1589500	0	3188200	0	2330300	0	2625700	0	1715300	0	0	3545800
0	0	0	0	0	0	0	0	0	0	0	0	440600	0	0	0	0	0	0	0	907270	1084700	0	0	0	0	0	0	0	0	0	0	828950	0	0	0	0	0	0	0	0	0	0	0	0	0	0	0	0	0
77065000	67275000	72785000	73290000	79642000	100270000	89331000	85886000	70285000	81901000	79720000	83706000	77230000	90484000	90180000	90029000	78098000	73924000	84582000	81341000	101720000	82245000	102110000	86505000	84596000	69815000	82837000	87342000	96458000	67293000	83897000	88484000	62808000	73836000	85243000	72919000	74356000	93631000	78705000	63218000	56626000	75592000	68113000	83688000	60849000	78042000	86334000	71333000	53367000	58998000
5360700	3817600	4082100	2410000	5670200	3279100	4730200	0	3265500	0	0	0	17478000	3805000	5184100	5655400	8330100	3361200	0	0	20155000	3574600	5348900	0	5954200	1640300	6589200	5717100	3087800	8095500	5779400	3922700	0	0	5633400	2694900	6689600	4779800	3802100	3765600	7700300	5274200	12612000	4247000	11782000	3763700	5257600	0	11757000	4320900
0	0	0	0	0	443620	0	0	0	0	0	0	0	426990	0	0	368110	0	0	0	0	749320	0	0	0	0	0	0	0	0	0	0	0	0	0	0	0	0	0	0	0	0	0	0	0	0	0	0	0	0
19321000	17309000	18816000	8675700	19707000	13414000	0	12819000	17348000	13413000	11916000	26571000	15952000	20005000	12068000	13520000	15214000	13535000	11675000	12657000	12895000	19708000	11081000	11219000	16699000	14864000	11315000	17329000	14767000	12409000	17813000	19728000	16870000	14070000	13868000	0	16123000	15685000	10265000	0	22950000	19759000	17283000	776930	20977000	14209000	11945000	14112000	21585000	16419000
54543000	30177000	63568000	42654000	69013000	55153000	31721000	34423000	64409000	55592000	50252000	56922000	54077000	83407000	73510000	46994000	63742000	51300000	47016000	56162000	56801000	54807000	50030000	54184000	40003000	65670000	62029000	41130000	33993000	46043000	40949000	40370000	44203000	48688000	44834000	43312000	42774000	44440000	51392000	21888000	58756000	50953000	0	57684000	52056000	59299000	60115000	43749000	70351000	89008000
1715900	2619400	2262700	2414200	0	6054600	0	1504100	0	0	0	0	0	1735100	0	0	3921800	0	0	0	2242500	1456500	0	1699000	2199500	0	0	0	0	0	0	0	3643500	4369300	0	1921500	2866500	0	0	0	1246800	2615600	10760000	1924800	2851900	0	0	0	0	0
1246400	1180300	1379700	1115000	0	0	0	2318900	0	0	7279700	0	1750000	1069500	0	1635300	3022500	1122300	952310	0	2104000	2237100	0	2208400	0	0	0	0	1111800	1400300	0	1089800	1885500	1743500	0	2311900	0	1784300	2986700	0	0	0	0	0	0	0	2835600	0	1130900	0
0	0	0	0	0	0	0	0	0	0	0	0	0	0	0	0	0	0	0	0	0	0	0	0	0	0	0	0	0	0	0	0	0	0	3104100	0	0	0	0	0	0	0	0	0	0	0	0	0	5543800	0
0	0	746160	0	0	0	0	0	0	442420	0	0	0	0	0	496340	0	0	0	744530	0	0	0	0	1114400	0	1408100	0	0	0	0	0	0	0	636220	0	0	0	0	0	0	0	0	0	0	0	0	0	1536200	0
240540000	256390000	282680000	306020000	267550000	227710000	289750016	310740000	251480000	237020000	290420000	324190016	213940000	238870000	249300000	316110016	205670000	266620000	320569984	264110000	217600000	270769984	308580000	266380000	280720000	281560000	324560000	316609984	233040000	248600000	363769984	326200000	250960000	216440000	290080000	322030016	221270000	229360000	269140000	331660000	220100000	223280000	222790000	317280000	288340000	297780000	310190016	351300000	194640000	135500000
0	5589900	0	3836800	8788300	2949500	2962400	3250800	4950100	0	0	0	2745900	3997000	1823400	2694700	4560200	5435200	0	4638000	0	3461700	3054400	3008300	0	2493500	0	1758700	3546300	0	4902300	3338500	0	0	2516700	4745700	0	0	7537700	2260000	0	0	2053900	2620000	0	0	2993800	4183900	0	0
3946900	4546200	0	0	12289000	10734000	0	0	4343700	0	0	3679300	6216900	5296500	6934800	0	4654900	4215900	0	0	0	10296000	0	0	2171500	0	1788200	0	0	0	0	0	6903100	0	0	0	6844900	4044100	0	0	3358100	3383700	0	0	0	3433200	0	0	10688000	0
0	0	0	0	0	0	518030	0	0	0	0	0	0	1085600	0	0	0	0	0	0	0	1158200	881300	0	0	0	1038400	0	0	0	1044600	0	1785600	1943500	904940	0	0	943100	698750	0	756680	0	0	0	0	0	0	0	0	0
4725000	3633100	4663800	7264600	5682600	4863800	6174900	8810500	3915700	10437000	10041000	9771500	7703100	7238800	6204400	8224400	5875100	3208600	6310800	6446500	7716200	5904200	8527700	9407100	11725000	3719400	6119900	6783800	9975400	6242400	5865400	7251100	10721000	5197700	6497600	4395700	8493300	5357500	6074700	4914000	5009600	6103100	7194300	8129600	4829500	4951400	5697100	2952100	4891500	5073500
85301000	83885000	65123000	65343000	128440000	72826000	78159000	69679000	141790000	76930000	53405000	64148000	101770000	87381000	88702000	76178000	89691000	104540000	73034000	64170000	106840000	100370000	96758000	89645000	111280000	77348000	84920000	81162000	80286000	75556000	71483000	67636000	95261000	101440000	87863000	62179000	128000000	85682000	79678000	54050000	94522000	97411000	74587000	62897000	90744000	64384000	100290000	77243000	134320000	97756000
0	0	0	0	0	0	0	0	0	0	0	0	0	0	0	0	0	0	0	0	0	0	0	0	0	0	0	0	0	0	0	0	0	0	0	0	0	0	0	0	0	0	0	0	0	0	0	0	0	0
0	0	0	0	0	3222100	1209900	0	0	0	0	0	0	0	0	0	1534100	0	0	0	1794900	0	0	0	0	0	0	0	6116400	0	0	0	0	0	0	0	0	0	0	0	0	0	0	0	0	0	0	0	0	0
0	0	0	0	0	0	4863300	0	0	0	0	0	0	0	0	8358800	0	0	0	3560800	0	5841800	0	3202800	0	0	3510200	4439200	0	0	3180600	4425800	0	0	0	4738300	0	0	3808900	0	0	0	0	0	0	0	0	0	0	0
17302000	30454000	15677000	15051000	14452000	16502000	27034000	23834000	18433000	12183000	21674000	17623000	29219000	22870000	18221000	0	24782000	31037000	26553000	27093000	21650000	26222000	0	24418000	20015000	21802000	30548000	23438000	17300000	11795000	14670000	23497000	21285000	16110000	15159000	15590000	17527000	21988000	17902000	17447000	15620000	29234000	20098000	23920000	22238000	0	13661000	30103000	11785000	8437300
727630	0	0	0	995630	0	0	0	0	0	0	0	0	0	0	0	629820	0	0	1222900	1124300	0	0	0	0	0	0	0	0	0	0	0	846070	0	0	0	0	0	0	0	0	0	0	0	0	0	0	0	0	0
0	0	307000	0	0	0	0	0	0	0	0	0	0	380030	0	0	0	0	0	0	1112000	0	0	328880	437870	0	0	0	0	0	0	0	0	0	0	0	0	1658900	0	0	0	0	0	0	0	0	0	0	0	0
9096900	7840400	8313600	13793000	6575600	7439400	10546000	5346600	8420800	6184200	15447000	6179200	8531100	4856000	9539600	6775300	7149400	7424200	5722700	8116800	7681200	5122000	10922000	8867900	7634300	5131900	9303000	13191000	11470000	10062000	7646500	6728000	7785000	6270000	9499400	5448900	6125300	5203500	11636000	4996000	7501200	6995600	10590000	6735100	18311000	8312500	7080600	7962300	9151300	10025000
17108000	21964000	17714000	20600000	18451000	17389000	16798000	20410000	15606000	17320000	26537000	28095000	18995000	21493000	25352000	24119000	17652000	23515000	24787000	17904000	23002000	19254000	33164000	20957000	24484000	14975000	16003000	26576000	17042000	18076000	21201000	18893000	15002000	14060000	18397000	21054000	15907000	22383000	16317000	16737000	14621000	20908000	20302000	16267000	12997000	15795000	21343000	24179000	13223000	16021000
3094600	4162100	5839200	2683400	6311000	5482100	5427300	5008700	6865300	5319500	5034800	2906800	4126700	8734200	9495700	4314900	7428400	3106800	5165900	5849900	3189900	3033300	4512200	5030500	6135100	5580900	5191400	4152000	3347500	3433100	6834900	8072100	0	2468200	3775700	3313000	0	5305000	2360700	0	3852100	4414500	3942000	0	0	3677800	5706800	1780100	0	3083000
49524000	53492000	76160000	0	41928000	51423000	45484000	24255000	35228000	57637000	43457000	36740000	55595000	47543000	43842000	50267000	3565400	42736000	42504000	66216000	53364000	67755000	50409000	49400000	64787000	69323000	44066000	64309000	67077000	143990000	38992000	73294000	80143000	40003000	55058000	45370000	47924000	45049000	50455000	64713000	45156000	60583000	37565000	61759000	68426000	72281000	37827000	35847000	31484000	56181000
2821100	4274400	4582500	6068400	5168800	4719200	6354900	4832400	2616400	4524600	8088300	6271300	5558700	5320100	7114200	6441800	1441100	4651300	6891500	6023300	2209800	3737000	6867100	6239700	3637100	5509400	5691200	7878700	2614900	5568200	3975800	6157200	1378800	4089000	5559100	10042000	0	4208600	3599400	10345000	4357900	5569400	5377400	10915000	0	3342100	6063200	9331200	0	3216200
15366000	10485000	6161300	13936000	12613000	14254000	9033800	9860900	4541000	12306000	16818000	10788000	9941100	14496000	10587000	11560000	8519600	17213000	11955000	14943000	10052000	14354000	13636000	12621000	12326000	14193000	21906000	19959000	13174000	11261000	12409000	16826000	9162000	10330000	14903000	10665000	8414200	17423000	16181000	14742000	10732000	15902000	11908000	18392000	10229000	12833000	15710000	13994000	9023700	12238000
12563000	13383000	9774200	0	16219000	15755000	9172500	0	35825000	23970000	8289900	13863000	21204000	12094000	12795000	0	24537000	11284000	9728900	0	21793000	24679000	14219000	17007000	21237000	26754000	13718000	41949000	20742000	63047000	15268000	14535000	10949000	16770000	29935000	0	13195000	12292000	8999500	0	33298000	22442000	10385000	0	13926000	13945000	9368400	13342000	26557000	18077000
0	1560600	1678100	3091400	0	1916200	2518400	2092800	0	1837100	3081500	1620600	0	1541800	2276600	2274400	0	0	2106200	2479400	1820700	4061800	2752100	2494000	3288700	0	2572400	2794000	2683900	2159300	0	2835600	0	0	2953500	1087100	0	3819100	2350700	2802400	0	0	0	2302500	1606500	0	3579500	4317400	0	0
3591500	4175000	2326300	5359700	0	0	8263300	3839700	0	3871600	5786900	0	0	6142800	6713000	5398600	0	3920800	5984600	4747600	3630200	0	8574000	2461900	3539100	0	3506800	3616400	3016400	10191000	5151000	5235600	4743700	0	4171000	10437000	5173700	5200900	6350500	3566400	0	0	0	0	0	0	6566100	5186600	2791600	2367500
13981000	20081000	12210000	10776000	13170000	14945000	10592000	14774000	19073000	18546000	16536000	12813000	15643000	14837000	17574000	10825000	15681000	26224000	25747000	17977000	23644000	13808000	13692000	20222000	10940000	15090000	13339000	14719000	21966000	14500000	13555000	14829000	12761000	15854000	17629000	12644000	10854000	16377000	12455000	9209500	9792000	12979000	15051000	14851000	14557000	11023000	12327000	0	12665000	17122000
45004000	48875000	33715000	42409000	36717000	62446000	38098000	45958000	51505000	58012000	34045000	57578000	38513000	27021000	35730000	37829000	45303000	30525000	34310000	33431000	34285000	48373000	35243000	38357000	41651000	35748000	34969000	41746000	43663000	48079000	52492000	33302000	36488000	38057000	39568000	18568000	45138000	47356000	28821000	28129000	41150000	36752000	29980000	22914000	27963000	41059000	31498000	32921000	25254000	26978000
16772000	0	35684000	58543000	38829000	37528000	41958000	69782000	24678000	80037000	48439000	48556000	20571000	1352600	65339000	0	0	28999000	0	139130000	0	0	0	42308000	0	39050000	56544000	0	26349000	60301000	42269000	42823000	18459000	22572000	46782000	158740000	11585000	23607000	36458000	0	12691000	19912000	36267000	109440000	28577000	35968000	28945000	0	15299000	25704000
11688000	4621200	7105900	7568500	6253100	0	10099000	5341300	4507900	4069000	7897400	5057100	3593300	11214000	9087600	7972500	3461700	6373700	9753800	6217400	4464700	5745200	5018900	5337500	5869900	3498000	9182000	5300100	5084100	11525000	10003000	8179300	7490200	4765000	4657100	0	10610000	6163000	13196000	10147000	7687800	0	4135500	8960500	5675100	0	0	4878600	6391000	5686100
0	0	0	0	0	0	0	0	0	0	0	0	0	0	0	0	0	0	0	0	0	0	0	0	0	0	0	0	0	0	0	0	0	0	0	0	0	0	0	0	0	0	0	0	0	0	0	0	0	0
14390000	15552000	21848000	20588000	22420000	19939000	21018000	19928000	20001000	32063000	18641000	26184000	16198000	26805000	14307000	26658000	23165000	15886000	7866900	16370000	23349000	34242000	24575000	28396000	24426000	17293000	24996000	18283000	28405000	20772000	14506000	30461000	16113000	17672000	24412000	16060000	15516000	24433000	25360000	20333000	15965000	16130000	12467000	12775000	29709000	35958000	21500000	20939000	16007000	11717000
73744000	46098000	54577000	68081000	60907000	53888000	49581000	43622000	47616000	44528000	45004000	75369000	58349000	47628000	58711000	69509000	59306000	49672000	46256000	62727000	56972000	57564000	52535000	46396000	72245000	58019000	53793000	58284000	45569000	55491000	53411000	65033000	57998000	56629000	44859000	63954000	111660000	49866000	35667000	41405000	62545000	48768000	63772000	45204000	62140000	49811000	56125000	41866000	54825000	58468000
3065100	0	0	0	2798000	0	0	0	0	0	0	0	3176700	0	0	0	9656800	0	0	0	0	0	0	0	0	0	0	0	0	0	5095100	0	1835000	0	0	0	3337700	0	0	3312100	2706800	0	0	0	3039500	0	0	0	4541400	0
0	0	902420	877560	0	835780	0	669420	0	825240	0	0	1213100	0	0	0	0	0	0	0	0	0	0	613170	933780	774230	747790	755910	965560	0	784150	703170	0	1123000	0	0	0	0	575310	0	0	782210	1037900	0	0	0	1135700	1270800	0	0
5951100	5969100	9510400	0	0	8610400	11576000	0	7587500	0	0	0	0	4948000	0	0	0	6602100	7321800	0	0	0	7891600	0	11181000	0	7173800	0	8710400	5389000	8308100	6769800	6593600	5110000	7179600	0	5905700	6048900	7568200	0	9145900	12186000	8781900	0	8610100	0	7259100	10750000	0	0
0	0	0	0	0	0	0	0	0	0	0	0	0	0	0	0	0	0	0	0	0	0	0	0	0	0	0	0	0	0	0	0	0	0	0	0	0	0	0	0	0	0	0	3294100	0	0	0	0	0	0
3358200	0	0	4797300	4261500	0	2075100	3283900	4169500	0	4164200	0	3016200	3101600	6274700	4937600	4046600	3826300	4824200	3963800	5959700	6124700	4239700	2851900	3826300	0	5104400	4333000	5222700	0	3013500	2849600	4070900	0	0	0	2705500	2456700	4066000	0	3602600	10632000	3392200	0	3672400	4025900	11774000	5507800	3341800	4685800
10176000	5134900	4279900	5976200	7023500	4235400	3932200	5247100	6139900	0	3337800	5351000	7161100	5147800	6434000	3915200	9436000	13472000	0	4876800	6428700	5585800	6808000	4936400	8445800	6332400	1324700	5135400	6449500	4183100	3612200	6408600	8164500	6844900	6090000	2245200	7391600	8296800	6588500	3100700	7406400	7037200	8675600	3995200	7632200	8363500	7429500	4374200	11879000	7650400
0	0	2884200	6640900	2150700	1724800	0	0	0	2889700	0	0	5300800	0	5811300	4281200	2198000	2505300	0	0	4870700	0	0	5845800	2583600	0	0	0	0	0	0	0	0	6013100	0	8237700	3418500	6199100	8564600	0	1611200	2662700	4435000	5094400	0	3568700	0	0	12220000	2251200
12014000	19990000	14862000	8342800	6619600	8658400	9299100	10590000	12602000	7765100	15178000	13341000	6494400	9802700	11302000	8946500	9055500	19088000	10268000	7953000	8954800	14815000	9052400	9312600	15552000	13439000	12746000	8273300	9330400	7345500	10876000	9921900	6388200	7733300	10618000	6101300	16856000	7748200	14827000	8994300	6514000	6192800	12852000	8209400	7180700	7966000	7990100	6613500	6775100	4940300
6632600	8399900	13891000	6598900	4716400	5006200	11195000	3912400	9494900	6472800	4303400	8006000	5431800	3113400	5782900	6170700	7841500	5084000	7774100	5463300	6293200	2932200	8058600	3648700	5510300	6422500	4670800	7425300	10696000	9343500	5971500	7368500	12262000	13473000	10013000	9786800	8878800	8452000	7216600	8914100	5993300	11297000	5787000	7410700	3985400	5783600	7074700	5743300	2184300	3996600
13593000	9045800	13463000	11357000	15284000	12530000	14247000	11854000	12302000	13529000	9749100	3341100	17350000	12592000	12470000	17975000	12393000	11288000	7910200	12849000	14747000	15133000	16569000	11076000	18575000	17874000	17253000	19148000	12404000	22323000	13600000	11785000	12659000	11613000	11511000	13156000	12529000	12035000	21505000	13379000	14373000	11573000	11812000	12019000	15823000	10453000	11664000	9589200	22718000	13086000
0	0	0	1324300	0	2946800	932690	0	0	0	0	0	0	0	1095700	1783000	0	0	1004000	0	0	0	0	0	0	0	1298500	1138100	0	0	0	1141000	0	0	0	1039200	0	0	0	0	0	0	0	0	0	0	1441700	1860000	0	0
0	0	1205500	0	0	0	1858200	0	782720	0	0	0	0	793670	0	0	0	2052300	0	0	0	0	0	0	3584200	0	1883800	0	0	0	0	0	0	2711700	1576200	0	0	0	0	0	0	984720	0	0	0	1401400	0	0	0	0
105600000	106340000	101750000	101730000	96505000	111780000	134460000	131610000	118370000	93064000	115720000	113120000	111980000	92079000	103120000	100850000	109290000	94972000	101620000	116790000	74850000	112280000	0	155020000	95851000	76277000	100170000	103760000	114310000	61959000	111230000	113890000	97323000	85390000	120000000	61055000	139780000	123230000	156000000	87365000	79505000	79154000	96432000	114270000	105100000	101500000	129120000	114610000	99403000	48794000
2778600	5093600	3451300	2237400	4978700	4889700	3330000	7203200	7136400	5370200	4649700	3562600	6470200	5319500	3827500	2370600	3209300	4675800	3754800	0	5505200	4642000	3559200	3415700	5421000	5314900	2850400	5344600	5152700	3129100	5193300	3528900	2551800	2421800	2209000	2578600	3925400	3755100	2571600	0	5853900	2212200	2534500	0	4533900	3193900	4971100	3156800	5829700	2952200
25634000	18626000	24589000	14951000	44516000	22968000	13167000	23466000	30486000	27180000	41420000	0	31986000	28320000	30012000	23221000	48183000	26390000	22129000	20220000	41819000	34351000	19570000	23884000	29010000	18760000	30643000	18631000	35092000	16455000	20130000	20575000	25831000	30550000	33921000	25144000	37089000	37871000	31901000	22507000	19023000	19147000	18217000	23627000	18187000	22073000	19214000	10338000	27903000	22236000
255490000	277430016	205950000	273420000	267080000	272369984	218420000	239040000	234900000	242050000	243230000	288800000	249960000	224420000	203100000	268640000	291790016	261910000	220560000	233140000	244240000	272750016	239860000	283960000	268460000	214540000	285870016	246290000	237200000	235310000	227770000	251670000	395320000	281510016	196850000	239570000	300800000	206030000	258040000	258640000	255340000	269489984	191050000	223810000	251050000	198210000	218240000	222210000	257600000	240200000
5025100	7075700	5375100	6987900	4586100	8353200	6415200	11953000	8946800	6656100	5711100	6761500	7529500	9776600	5081500	7287900	8110200	7853700	7043400	8879200	0	6440700	5176200	6970200	9525000	5646700	7440300	9800400	23421000	4088700	8622000	6638100	4695700	7348600	3517500	7238900	5808200	0	4799500	5216400	7421400	0	7969000	9880100	7578600	5293300	10569000	5252800	7379400	17845000
44569000	28935000	16684000	14106000	12789000	31294000	10645000	17008000	9650200	15304000	17496000	10632000	15178000	17330000	12575000	10451000	18076000	17638000	10314000	7184300	27300000	19378000	12533000	7254200	12730000	23252000	7628300	15330000	14016000	17904000	6841600	12737000	9591900	23578000	8972000	5749900	10572000	18642000	12180000	10347000	15186000	13257000	12119000	0	0	15284000	14371000	11033000	9960600	9319500
295380000	352060000	339700000	316120000	344190016	327729984	309940000	322980000	356969984	327150016	307140000	406860000	359240000	345070016	372409984	363080000	359780000	365529984	319049984	361100000	385529984	424529984	349529984	354900000	353449984	337040000	355020000	306320000	401460000	389220000	350200000	322089984	298990016	312060000	284910016	321009984	302720000	359300000	302089984	319380000	304809984	337540000	329560000	362660000	303200000	328920000	335800000	348420000	291500000	320600000
5182500	6484800	5408700	4858400	0	6874000	4134100	6338100	4628500	6727300	0	3984400	7802400	8280100	0	12297000	3990700	0	4878500	4742600	5370300	12890000	5198800	5517100	5460700	0	8240500	4580100	6585900	5043700	5093800	5546800	0	13035000	3800800	9822400	6167100	7208700	4698400	0	8703100	5746300	6659800	8885700	0	7451200	6560300	0	6172000	23554000
308969984	374969984	293529984	352230016	311190016	310060000	277310016	301529984	362020000	323160000	310249984	281400000	370830016	373190016	323449984	317289984	380200000	347449984	312260000	310620000	383489984	376200000	331140000	336400000	405750016	344329984	361480000	334350016	447060000	375240000	329780000	313169984	379769984	438000000	317929984	267340000	352660000	324910016	365120000	317609984	303020000	443209984	311460000	282270016	355969984	384180000	418700000	315980000	368430016	356470016
42466000	39797000	52808000	47054000	54253000	29470000	45428000	50104000	38147000	34138000	48018000	56348000	44607000	53307000	57722000	55447000	63412000	46327000	38052000	29909000	56162000	33505000	42331000	40967000	36115000	38840000	64258000	50491000	38745000	45212000	44093000	55417000	55315000	25608000	38514000	55377000	56065000	20191000	37588000	33791000	52627000	39494000	52458000	51242000	77073000	47253000	36612000	41122000	0	36527000
0	0	0	0	1651600	0	0	0	0	0	0	0	4084300	0	0	0	0	1699100	0	0	1371300	0	0	0	2467300	1487500	0	0	3009700	1629700	0	0	0	2059800	0	0	0	1411400	0	0	0	0	0	0	0	1419200	0	0	0	0
8913800	10256000	9877600	5163000	0	9252800	9014100	9753400	9055700	7121100	7293200	0	0	305140	0	8513300	0	0	19769000	9538600	0	0	8099600	5222200	8799500	11716000	9630500	7920900	11139000	10202000	10511000	11185000	0	8143500	6060800	7512800	0	10563000	7504800	5876900	11492000	6652300	8440100	5502500	10079000	5426200	8854900	0	12603000	0
157100000	266210000	249940000	180620000	194860000	165270000	216160000	200810000	286769984	240540000	231860000	161520000	221110000	197740000	277929984	180850000	307190016	270870016	255320000	165060000	257640000	231290000	172930000	219910000	295340000	287369984	196310000	269900000	240400000	229220000	259030000	232650000	217770000	292140000	257960000	272920000	180610000	197960000	189280000	165470000	250350000	265440000	303809984	221810000	190820000	265520000	236170000	211170000	275320000	307600000
12439000	13260000	10365000	10900000	12211000	12752000	13677000	12860000	18188000	14382000	10824000	15172000	14608000	13123000	10263000	14598000	14650000	18256000	15804000	12450000	12365000	12708000	15394000	16531000	13146000	12164000	13089000	12941000	11509000	13217000	16357000	16190000	13390000	12909000	11665000	28049000	12240000	9955900	10848000	10250000	5325700	14323000	15019000	14872000	13897000	11501000	12119000	12922000	0	8966100
14100000	10144000	14692000	8256400	9258400	13593000	7275500	7289900	11082000	6434700	17765000	7569200	12991000	16024000	9764700	12325000	11374000	11712000	8398500	7414100	9997900	12816000	9870000	8324100	9244500	10611000	8303300	8747900	19074000	19976000	9889000	8513000	9416400	18853000	7586700	8974700	9569200	9217500	9417400	5920300	8725200	12905000	12350000	9743100	12855000	14291000	13509000	6525500	14283000	9146200
62339000	44840000	36934000	40854000	39852000	39538000	37106000	29841000	97112000	33447000	30456000	31666000	66089000	60379000	39407000	22662000	56253000	58902000	40387000	38099000	45854000	0	0	44802000	40046000	46428000	54666000	39189000	35529000	22314000	47453000	36838000	40481000	23870000	57376000	49047000	37802000	36220000	33360000	23696000	61421000	51703000	35412000	60239000	59041000	0	35677000	61378000	25298000	47228000
41889000	42577000	43890000	38101000	37034000	42871000	31809000	56281000	29053000	35820000	32930000	39175000	37660000	68405000	43692000	39442000	37288000	45351000	30343000	48324000	30357000	38703000	36334000	41789000	33835000	38664000	41100000	35028000	36618000	58214000	35250000	32060000	37027000	36304000	32792000	35644000	29248000	42777000	34659000	43513000	38107000	39755000	38893000	64365000	37021000	19557000	52183000	10007000	46290000	43634000
186300000	254380000	271780000	301220000	247260000	239650000	235010000	239520000	269140000	331640000	256010000	316780000	268480000	300340000	297569984	255020000	245490000	292369984	313000000	302060000	260630000	310310016	256900000	256490000	263380000	268569984	264810000	260460000	237480000	257990000	273910016	288840000	268520000	277289984	228460000	268390000	250190000	246160000	286240000	229940000	218740000	265570000	269220000	288480000	226030000	279689984	348340000	285460000	194530000	183840000
807340	987860	1281700	1867400	0	0	1359300	1573200	0	1165100	2261000	2368400	0	1169700	1313800	1298300	722410	960440	1683100	1334900	1317200	890890	1635100	2075000	866320	1667900	2012900	2451300	1141600	1807300	1848200	3528500	1213200	1161900	0	2690400	1059200	1965500	1243700	3615500	915570	1225300	1504700	2263900	809680	928190	0	1737100	0	1227200
3273600000	3568399872	4292300032	3686099968	4347400192	4018299904	3794599936	3501499904	4372299776	4533799936	3531000064	4052699904	3234200064	3394200064	4174500096	4312600064	3948999936	3690700032	3941400064	4017999872	4009499904	3331200000	3951899904	3828900096	3814599936	3565100032	3832699904	3734500096	3778099968	4541799936	3377499904	3462099968	2925299968	3208800000	3470400000	4521399808	3524199936	3479300096	3315699968	3899800064	3549700096	4148900096	4059300096	4105400064	3158299904	4690800128	3924999936	3868400128	3228100096	3636400128
752449984	965020032	948230016	913409984	858169984	885950016	880350016	1004499968	770910016	900809984	890520000	1164400000	717660032	940240000	855310016	960430016	899160000	769270016	1006800000	955520000	832280000	811870016	924920000	1158000000	799990016	968620032	1150499968	1104300032	875120000	954830016	946860032	901049984	986350016	1086499968	1258400000	1716000000	1139600000	1026600000	1045900032	1216999936	875720000	1061699968	1194899968	1327100032	964040000	972249984	1122000000	1290499968	998990016	908289984
3540800000	4893799936	5401099776	4981000192	4079699968	4962500096	5226200064	4646799872	4714399744	6225800192	6431600128	4997000192	5226299904	4816900096	4572899840	5376799744	4878199808	5008300032	4936399872	5246799872	4789199872	5633099776	4835700224	5510099968	5221100032	5405199872	5503300096	4917700096	5306899968	5997300224	5615600128	5771500032	4106700032	5160800256	5800500224	5183300096	4074700032	5117000192	5528900096	6245799936	3541299968	4452499968	4250200064	4360500224	4298800128	4707500032	5760999936	6190600192	4153299968	3132900096
0	12114000	10103000	13140000	9944900	7922000	12729000	0	24710000	33707000	17573000	14695000	17296000	15612000	14203000	0	10142000	18730000	0	10445000	7136600	12132000	16996000	0	26976000	0	0	0	32897000	14921000	0	15132000	0	19541000	15135000	9263600	11397000	10671000	0	0	20056000	31518000	0	0	12078000	17314000	10866000	0	22142000	33197000
38256000	44149000	34774000	22496000	33973000	36956000	26065000	37721000	26237000	33453000	34666000	24332000	39973000	38760000	31831000	33985000	25686000	29903000	21603000	40544000	83473000	32196000	41586000	38436000	33884000	41255000	34006000	61545000	32750000	32258000	39840000	28721000	31105000	53562000	20978000	28271000	23912000	54005000	60545000	26623000	28582000	29415000	25880000	30165000	27717000	42778000	54138000	58683000	46602000	24200000
9660199936	9350200320	10065000448	11079000064	8793199616	10672000000	10334999552	12106999808	10128000000	11761000448	10268000256	10510999552	8474500096	11098999808	11194000384	11329000448	9450300416	11399999488	9832399872	11242999808	8593500160	9901599744	9657900032	10469000192	9939399680	13038999552	9530600448	11568000000	10167000064	12245000192	11614000128	12885000192	10595999744	11548999680	12839999488	12830999552	11656999936	12696000512	10840000512	12241000448	9498600448	10476999680	12817000448	11857999872	10675999744	10832000000	14088999936	14497000448	11331999744	9618599936
0	5102900	4736900	0	4673500	5126300	5857800	0	4249800	0	0	0	3458400	3972900	0	3042700	5252200	3932600	0	4649900	7844300	3507000	0	4763900	8100300	5101900	0	4560800	5752400	5495300	4187200	3633600	4432900	4714500	3376600	0	3961200	4171000	3490700	0	5895600	6362000	4435400	8169600	4227300	4052800	69580000	689110	8059000	5474800
8465300	6180100	5930000	8344900	17643000	9624800	6663100	9077700	8630200	11698000	9774300	8873100	9669700	5703400	8470400	7883200	7558800	9028400	8872700	6233000	10870000	10843000	6716000	6590700	8529300	6674700	9647900	5534700	9323600	8471600	7670800	11365000	0	5789300	13233000	7675900	6247500	9930500	7392800	6983700	9802100	8362000	6688300	7919700	8632100	10411000	6148900	6598000	5076100	10787000
38501000	20922000	18202000	14056000	27263000	16974000	41919000	27726000	0	8727500	0	4572800	15109000	0	11622000	8559300	0	8327400	3327800	6351200	4569700	0	3589800	4603500	0	7230400	5083900	7876300	14097000	10923000	13978000	9487000	33575000	22513000	13869000	12714000	9565100	11096000	6548900	8258000	12989000	12594000	8506900	5715000	0	0	3567100	0	111720000	113740000
105890000	120460000	127230000	122560000	117820000	119040000	91901000	103870000	111260000	216260000	182150000	157140000	87567000	125980000	114530000	123960000	89893000	83223000	135130000	89893000	100190000	156630000	119230000	127580000	105760000	119600000	127380000	123790000	110510000	127060000	160860000	117060000	102200000	125280000	99974000	79169000	131700000	101310000	116430000	62210000	121770000	158650000	140220000	107740000	155350000	116640000	115490000	157730000	118380000	118680000
1185900032	1087800064	1254899968	1509400064	1133100032	1304600064	1193699968	1328400000	1155299968	1025800000	1185299968	1341600000	1078000000	1077799936	1271600000	1176400000	993400000	1176400000	1089799936	1162599936	1254599936	1390300032	1348499968	1183500032	1248600064	1276099968	1264800000	1168400000	1115500032	1410000000	1261799936	1222400000	1063200000	1358000000	1336400000	1455000064	1248099968	1382700032	1505400064	1616999936	1068700032	1183500032	1347500032	1430800000	1425500032	1277900032	1539100032	1608800000	985440000	889150016
3350700032	3833299968	3739699968	3879399936	3221799936	3268000000	3374000128	3148000000	3354299904	3658099968	4076800000	3818400000	3470899968	3796600064	3310700032	3720399872	3434500096	3636100096	3770599936	3987000064	2892699904	3624199936	3628800000	3841200128	3929299968	5089099776	4591300096	4851899904	4105999872	4715899904	4126700032	4674800128	3694400000	3700199936	3768000000	4489099776	3783899904	3861299968	3724100096	4084100096	3132499968	3603699968	3274599936	4601800192	2833400064	3250599936	3963500032	5187999744	2620800000	2057400064
0	0	0	0	0	0	0	0	0	0	0	0	0	0	0	0	0	0	0	0	0	0	0	0	0	0	0	0	0	0	0	0	0	0	0	0	21090000	27129000	11297000	9477600	0	0	0	0	0	5009800	0	0	0	0
140860000	116930000	171770000	114230000	175230000	197670000	122160000	136060000	180340000	118470000	167740000	129250000	131160000	125860000	124970000	127510000	124140000	195620000	95951000	120860000	153960000	113120000	143180000	136150000	152100000	161890000	117460000	130590000	130770000	149920000	165060000	121760000	99555000	130420000	119260000	104440000	140770000	159380000	195830000	142440000	142170000	129640000	172660000	184120000	106620000	104540000	213540000	116800000	137010000	64282000
0	1128300	0	0	0	0	0	896010	0	2593300	0	0	0	0	0	0	0	0	0	923720	0	0	773480	0	0	0	1927200	4199500	0	0	0	0	0	0	0	0	0	0	898700	0	0	0	1789200	0	0	0	0	0	0	0
1055100032	1019100032	951539968	963270016	1219800064	957190016	1107299968	883100032	692689984	749609984	783950016	744249984	1110700032	1191100032	1030499968	946320000	1002200000	948499968	848339968	1047299968	1085799936	919859968	982809984	811809984	911740032	1045699968	868440000	970460032	896689984	766920000	781390016	873470016	1099200000	1055000000	779609984	821560000	1091600000	849859968	905840000	763830016	876220032	931420032	882710016	845920000	842270016	976590016	1004499968	639980032	1025200000	1423200000
846160000	717569984	789870016	866809984	734920000	702089984	712929984	764600000	952089984	753600000	808169984	1009200000	703859968	930920000	771720000	1028499968	882339968	939500032	802620032	865809984	907280000	937320000	760110016	978510016	1073200000	1018099968	957939968	843809984	885660032	795670016	770979968	1010800000	947830016	889000000	893529984	1025600000	868040000	881769984	793459968	698780032	968489984	1071900032	871350016	1144000000	926819968	973520000	766489984	1096199936	898329984	840590016
1457900	1881300	2875500	1990600	0	658820	0	0	0	1108200	1305800	998880	0	0	0	0	750460	848830	3408400	568810	0	0	1184900	0	970830	1364400	1658600	1819300	714940	1515900	1266300	1693400	844180	566950	1414000	0	0	0	0	0	1677000	1137200	3211400	3728200	0	0	710190	0	100850000	58051000
106170000	67436000	83430000	113930000	90819000	84999000	66393000	98670000	179450000	83071000	92041000	135310000	82379000	108500000	98361000	94044000	131630000	76754000	166380000	125210000	144650000	153740000	143600000	103320000	112940000	108920000	67601000	153910000	81189000	84039000	74622000	70247000	63097000	93179000	103130000	162700000	82924000	139420000	66979000	102150000	52908000	92876000	110680000	165310000	70726000	84838000	69934000	100870000	92622000	108670000
142550000	123930000	112100000	122420000	282630016	243210000	224000000	177020000	49601000	49630000	23635000	43368000	112600000	92360000	84444000	101420000	75833000	70717000	30225000	62611000	29366000	20187000	22649000	27573000	46060000	10769000	35886000	49392000	93360000	42630000	80039000	90098000	225220000	222400000	222520000	176970000	157710000	155900000	121560000	100660000	75602000	73380000	57258000	58882000	45078000	36564000	34225000	32622000	783390016	791630016
3790100	7131400	1984900	0	0	1808000	0	0	0	0	0	0	0	0	0	0	0	0	0	0	0	0	0	0	0	0	0	0	0	0	0	0	0	0	0	0	0	0	0	0	0	0	0	0	0	0	0	0	0	0
185200000	289220000	278880000	276809984	467510016	599120000	598369984	576049984	54748000	141500000	103910000	125300000	139610000	210470000	233140000	259410000	105760000	155450000	193830000	151810000	82476000	122860000	78465000	102330000	137680000	113410000	136970000	144010000	256650000	287260000	347889984	315660000	156280000	359409984	296480000	362830016	192170000	173800000	221260000	304950016	79930000	179330000	141730000	190150000	74659000	195850000	114210000	226750000	565720000	740910016
3019699968	5812700160	4994500096	5933300224	2936499968	3872000000	3146500096	2851599872	2827000064	5986299904	5954200064	6093100032	3752300032	3897400064	4663399936	3584999936	5251500032	6478700032	4568200192	6256099840	3193499904	3805799936	3100100096	3204400128	4024399872	3745200128	4861700096	4195200000	3063699968	4482899968	3785700096	3809799936	3997799936	5154699776	5177500160	5314999808	4726700032	3518599936	4306200064	3859899904	6423399936	9429999616	8063000064	12659000320	5119900160	4599000064	4336699904	5269300224	25755000832	31402999808
6733799936	8131299840	8012899840	8607800320	3970099968	4753900032	4373100032	4519199744	6816200192	7118099968	8549100032	10019000320	4038000128	4985399808	5748599808	5070199808	5855799808	6593099776	8538100224	7921699840	3587200000	3945700096	4949100032	4866500096	5976999936	7022199808	6879300096	7798600192	3908000000	5475299840	5555700224	6400500224	6938200064	7797700096	7624900096	10072000512	6143699968	5284700160	5750900224	7383799808	12675000320	15635000320	17148000256	22258999296	5077000192	5615300096	6130400256	6614300160	46620999680	46144000000
0	0	0	0	12536000	10839000	19254000	12739000	0	0	0	0	0	21009000	0	0	0	0	0	0	0	0	0	0	49453000	0	0	0	31152000	0	0	0	0	36663000	0	0	4512900	0	0	0	100630000	67795000	121280000	135030000	0	0	0	0	0	0
0	0	0	0	0	0	0	0	0	0	0	0	0	0	0	0	0	0	0	0	0	0	0	0	0	0	0	0	0	0	0	0	0	0	535150	0	0	0	0	0	0	0	0	0	0	0	0	0	0	0
3436999936	4006299904	3836300032	4011399936	3192199936	3520499968	3920600064	4200100096	3690599936	3899699968	4305600000	4818800128	3447800064	3851599872	3563300096	3643099904	4321099776	4604000256	5613300224	5084199936	3301900032	3357499904	3015600128	4172600064	3180400128	3729299968	3554099968	3640699904	3417700096	3432000000	3689999872	3979899904	5954100224	5095399936	5856200192	7148100096	4040499968	4181400064	4777200128	6471000064	5248699904	5808900096	5880099840	6906299904	3150899968	3884699904	3982099968	5262799872	8816300032	7163800064
537670016	556089984	539110016	547950016	606270016	538950016	559969984	665609984	329910016	341550016	452169984	397960000	486009984	468500000	417550016	453400000	452729984	503510016	587420032	492080000	389150016	475580000	384609984	484780000	349660000	382550016	388200000	481790016	476500000	415760000	546700032	570979968	407260000	364520000	353760000	432780000	439009984	425809984	396300000	466060000	358529984	325550016	396310016	394100000	313820000	469600000	410120000	565580032	282980000	414150016
0	0	0	0	0	0	0	0	0	1292700	0	0	1058500	0	0	0	0	0	0	0	0	0	0	0	0	0	0	0	0	0	0	0	0	0	0	0	0	0	0	0	0	0	0	1121100	0	0	0	0	21646000	13232000
39320000	17490000	22042000	24358000	96069000	58277000	85303000	101920000	17048000	23243000	16010000	23472000	17922000	9449200	12432000	24405000	24746000	13096000	14247000	20184000	5687300	3269800	11606000	6554800	10741000	14767000	11153000	12392000	17158000	6240500	11429000	9583900	44785000	33760000	35078000	55608000	17216000	36734000	26279000	27643000	22551000	20796000	26082000	26826000	15533000	10885000	12557000	14863000	238610000	217900000
73060000	75442000	36612000	68669000	121990000	90319000	77361000	162970000	21514000	19495000	11002000	31647000	22771000	22746000	37188000	33103000	11988000	32646000	23413000	31692000	18992000	22276000	15065000	0	23314000	14143000	21603000	9567500	16515000	15000000	14163000	21782000	55150000	113020000	59656000	48425000	50866000	92009000	42222000	42972000	31208000	29140000	0	48586000	27433000	0	21142000	0	127140000	264280000
0	0	0	0	0	10344000	22681000	13724000	0	0	0	0	0	0	0	0	0	0	0	0	0	0	0	0	0	0	0	0	0	0	0	5832100	0	0	0	15349000	0	0	4529700	0	0	0	0	0	0	0	0	0	0	0
27808000	29909000	24303000	22009000	61513000	69358000	102850000	60854000	16893000	7239000	18571000	17389000	15030000	8902900	2243500	9776300	22478000	14564000	16040000	15995000	5605000	11834000	0	6622900	13113000	9071000	9699900	12982000	2031300	7856400	1970000	9497500	33312000	31717000	28445000	20421000	27473000	25911000	13759000	21311000	23937000	20132000	13904000	19239000	5163100	6561700	16069000	6708000	66776000	150050000
1291900	0	0	1804300	0	0	0	2381600	1312600	1233500	0	0	0	2016100	0	2188300	1620100	2114400	0	2926500	1262900	0	94051	1452300	1200200	1811100	0	2732600	0	0	1886400	1028000	3167600	2073100	1770900	0	0	0	0	0	2013300	3111400	3772900	8549700	1439000	0	1026000	1990900	2262700	4836600
0	13067000	7356000	9349700	11321000	10150000	0	0	10602000	6868500	9113800	7910400	11287000	7445500	11041000	17685000	12014000	13173000	18631000	0	11065000	8636300	10343000	4285300	13515000	10422000	15428000	14881000	11589000	12236000	0	14179000	11721000	9077100	6540400	7816800	12172000	15550000	8854100	7509000	9545000	19330000	0	8060800	8433100	10033000	8218600	0	6265800	9421600
8312900	8387300	0	6784900	0	7073200	0	8193700	4522100	6775700	11753000	5002300	9024500	0	6157900	9251000	0	0	6119700	6848600	5855000	5022700	5349700	7213800	6413600	11918000	8289200	8251000	8229100	4603400	6100100	9360000	5700000	6600900	3507400	5084200	5661700	4799100	5424500	0	7183500	6750700	5493200	0	6643900	0	8575100	7138500	5756800	8259300
866280000	1196099968	1042800000	1055600000	1010499968	838409984	736880000	784889984	739670016	746680000	723369984	815569984	893710016	834710016	865030016	756760000	823169984	989249984	945779968	838310016	871059968	869059968	965680000	767480000	1012099968	1037100032	900040000	845520000	946569984	878520000	868120000	739889984	1002400000	1227800064	1209500032	1546099968	1165299968	1197799936	1152000000	1033400000	671580032	1296400000	891209984	1004499968	872120000	1218499968	1401500032	1318000000	1158200064	1016000000
0	1769600	0	0	0	0	2251600	2332400	0	0	0	0	0	0	0	0	0	0	0	0	0	0	0	0	0	0	0	0	0	0	0	0	0	1804500	0	0	0	0	0	0	0	0	0	0	0	0	0	0	0	6647300
0	0	3018300	0	0	4243600	2582400	0	0	0	0	0	0	0	0	7683600	0	3012900	0	4561600	0	0	0	0	1857000	2874500	2958900	0	0	4357200	4868900	314270	7463000	0	3739000	6559500	2693700	0	0	0	0	0	4284300	0	6285500	0	0	0	0	0
34244000	19362000	11007000	9733900	20812000	19782000	11497000	8543700	23601000	24138000	11802000	19600000	24556000	16295000	13231000	10647000	22399000	10598000	10485000	15037000	17990000	15592000	13772000	11348000	15744000	15873000	14454000	10852000	15386000	19129000	13456000	16643000	18590000	18578000	18981000	12101000	17296000	15731000	14083000	8490800	16121000	12261000	15646000	12726000	13307000	9634700	13058000	10501000	13321000	18004000
730940032	622739968	678569984	734849984	769169984	696099968	612819968	829640000	882190016	814220032	716040000	766110016	867729984	605649984	982169984	876339968	558470016	884889984	891470016	635569984	666440000	579729984	810889984	846249984	731449984	859449984	853139968	734590016	818089984	804670016	771849984	653249984	735350016	884710016	622449984	904819968	666670016	927619968	932880000	840870016	837760000	666620032	663790016	589560000	869969984	713880000	764689984	886120000	589150016	586000000
981240	636100	1532800	2241900	833360	595750	0	1495500	3199500	0	1402000	2812700	867550	661280	0	2470600	905350	1522300	1938100	2045100	854110	804340	1156300	1306800	840670	0	957300	2401000	767950	0	1024900	1334000	749470	703950	1542400	0	709080	0	1141100	1580900	977650	983580	1104600	1455600	918720	691920	1946800	1733900	981320	1004700
61713000	54632000	46102000	59255000	49593000	48495000	48969000	70482000	70567000	56710000	57174000	87033000	72849000	55034000	96515000	78364000	78670000	67192000	80873000	57251000	50461000	54317000	59635000	65428000	81105000	38672000	54620000	53467000	44239000	46170000	49669000	68753000	36961000	43540000	63803000	75772000	43432000	43521000	76158000	44723000	48480000	53363000	56777000	39391000	39035000	34128000	73169000	22656000	63897000	47856000
449080000	516809984	550780032	596609984	389300000	456020000	433409984	528910016	529809984	334750016	278169984	430620000	490470016	690710016	786000000	593569984	427680000	367910016	388729984	625409984	374780000	635379968	469649984	568600000	639350016	534720000	485000000	467640000	567489984	712000000	482500000	401460000	400110016	324910016	402009984	536780000	288620000	439500000	413240000	711289984	182010000	424460000	493960000	514729984	378249984	551760000	463040000	752790016	254050000	307049984
8408300	18640000	15254000	7248800	44935000	69548000	43040000	35344000	0	0	5243900	9060400	5629000	14014000	13004000	5195800	0	4839200	4356400	0	0	3262900	12654000	5326700	3802400	5861000	8571500	5749500	28888000	17763000	27361000	22152000	14963000	38697000	20705000	32964000	17933000	19544000	19234000	22161000	0	0	3447000	0	0	3015000	0	0	73218000	55220000
35274000	5738500	0	0	0	0	0	0	0	0	0	0	0	0	0	0	0	0	0	0	0	0	0	0	0	0	0	0	0	0	0	0	0	0	0	0	0	0	0	0	0	0	0	0	0	0	0	0	0	0
5649100	8749300	5575700	8647300	7767700	8522700	11630000	12957000	0	1536300	0	0	7616100	3735000	0	7770800	3880100	9726800	0	5992100	0	0	0	0	5660900	0	5756600	5280200	6946700	9097200	8028500	5343400	7716300	14575000	6938300	6512600	8579800	9266400	8428600	10709000	5773900	10014000	5443200	6125000	4989300	10386000	4543100	5926700	10118000	0
47199000	44406000	55317000	76109000	28861000	61762000	54747000	32861000	56691000	55383000	54241000	0	23029000	29138000	36559000	35457000	57825000	24157000	20578000	20982000	38353000	41636000	56103000	56295000	30693000	66332000	45690000	64682000	51474000	66573000	47134000	20093000	64896000	49362000	36618000	22372000	54485000	250690000	52470000	40764000	55601000	79375000	69576000	39087000	39008000	57013000	57067000	46754000	57919000	75379000
8763900	0	6228600	0	0	0	0	0	0	0	0	0	0	0	0	0	0	0	0	0	0	0	0	0	0	0	0	0	0	0	0	0	0	0	0	0	0	0	0	0	0	0	0	0	0	0	3830800	0	0	0
229350000	124250000	174960000	140120000	151980000	174260000	149730000	174110000	204780000	180920000	171280000	116790000	204350000	171980000	144980000	161990000	205110000	200460000	210790000	221210000	208720000	187130000	141560000	206210000	169400000	130610000	144140000	155790000	183580000	216150000	148560000	161210000	177870000	158920000	173700000	175610000	184930000	182320000	129150000	114090000	256130000	144950000	141600000	152730000	125810000	112060000	148640000	152660000	252260000	197840000
270780000	327929984	320820000	379480000	336460000	340710016	328720000	294849984	295729984	273449984	256010000	343280000	285889984	346720000	326270016	371500000	280070016	378049984	286150016	270830016	292200000	236880000	289000000	299209984	291150016	259160000	295840000	310560000	277750016	277640000	318910016	354000000	302260000	244450000	311300000	284500000	277660000	292840000	289140000	320160000	214290000	280940000	197850000	273750016	308729984	276860000	271540000	313680000	140820000	220900000
2243099904	1709400064	1883500032	1572899968	1797100032	1646300032	2044700032	1500199936	1956000000	2089299968	1811299968	1898599936	2022499968	1807100032	2264100096	1760700032	2002000000	2120499968	1804600064	1718899968	1525900032	1757600000	1675200000	1603299968	1758700032	1951800064	1932400000	1619200000	1584999936	1986000000	1664099968	1985500032	1993200000	1703100032	2084800000	1771699968	1864499968	1970499968	1770400000	1504899968	2154099968	1743699968	1803299968	1337699968	2468400128	2106599936	1828700032	2103699968	1585299968	1123600000
0	2273900	0	0	0	0	0	0	0	0	1511700	0	0	0	0	0	0	2838300	3078200	0	1852500	0	0	0	0	0	0	0	0	0	0	0	0	0	0	0	0	0	0	0	2491300	4010500	5015800	0	0	0	0	0	0	0
9112900	10305000	0	0	5233500	0	0	10066000	7390500	0	0	0	6328400	11150000	0	0	6499500	4955400	0	0	7584700	8522300	0	10306000	9765200	4601100	0	0	7282600	0	0	14027000	5098000	5107200	0	152420	10823000	8686400	0	0	5533600	5438300	0	0	8988100	5510900	0	0	5459300	0
0	0	974840	0	0	0	1010400	0	0	0	1634700	1267900	1162000	0	3527500	1434500	985550	0	6965600	0	1197800	0	0	1216400	0	0	991720	1640100	1368400	1607600	0	801850	0	0	2988500	1101400	0	3507300	0	976380	1168700	1367300	1081500	0	0	4827000	1767700	0	2235100	2030700
15060000	0	18926000	6955400	15857000	0	4673100	0	18323000	0	7182100	7336200	7802300	13485000	9765300	5139400	9273400	14034000	4211800	7466900	10914000	0	6164300	8255100	6721700	0	10204000	5925400	4151200	9484200	8488800	7540400	12714000	9337900	15862000	5005100	11744000	12979000	0	5228100	13532000	9189700	24453000	7802100	9696100	10980000	7299400	15233000	8147000	0
0	0	0	0	2432600	0	0	0	0	0	0	0	0	11296000	0	0	0	12509000	0	0	8259800	1368000	0	0	0	0	0	0	2522600	0	0	3629700	0	2483700	13583000	7632500	0	0	11425000	0	0	0	0	0	0	5717000	0	0	0	0
27606000	30958000	36505000	26125000	43109000	28411000	31873000	36847000	36292000	24713000	37076000	38745000	46843000	33755000	38002000	40762000	36081000	24649000	31978000	36740000	32713000	39804000	37086000	38995000	35128000	35968000	25217000	40170000	37356000	44013000	46844000	33098000	37225000	26781000	37204000	36718000	43738000	34146000	50645000	37696000	31031000	41986000	33823000	44693000	37122000	34313000	41665000	32091000	23248000	26340000
46892000	55621000	63457000	62607000	71220000	76919000	67096000	99992000	61591000	67582000	189830000	51067000	93939000	44524000	67870000	43777000	47508000	46752000	46299000	40657000	48726000	64983000	51171000	87524000	65143000	99181000	76202000	48644000	66535000	104240000	101120000	48533000	52643000	68249000	52901000	71416000	61846000	57704000	67644000	137090000	36535000	51709000	52297000	87653000	93832000	49744000	78708000	78895000	39646000	27468000
212630000	298590016	324680000	235600000	357009984	260690000	372609984	298870016	270310016	197620000	308649984	336480000	330089984	302190016	387040000	247670000	240900000	295249984	345640000	306180000	273400000	322500000	281840000	284809984	234070000	216810000	284980000	212570000	282720000	251920000	284969984	314140000	222820000	394000000	290849984	388609984	209110000	295520000	171940000	215810000	343289984	347400000	360470016	339360000	236460000	252150000	252070000	366640000	211470000	219880000
48067000	0	13364000	21134000	0	25690000	18316000	21477000	0	14798000	0	33172000	17920000	14186000	9514500	10725000	15324000	11574000	14182000	33778000	23399000	14310000	14925000	17209000	24777000	10243000	16671000	26779000	11116000	27546000	14443000	22463000	0	10598000	15320000	11520000	0	0	15931000	13553000	6716900	7390300	12215000	20823000	13064000	0	0	14649000	50682000	24671000
0	0	0	0	0	0	0	0	0	0	0	0	0	0	0	0	0	0	0	0	0	0	0	0	0	0	0	0	0	0	0	0	0	0	0	0	0	0	0	0	7363700	0	3798400	0	0	0	0	0	0	0
110520000	108850000	122970000	121910000	115390000	97086000	111370000	176210000	116000000	83266000	124940000	136270000	100450000	122800000	120130000	103370000	96557000	97414000	95801000	101880000	130250000	112170000	130590000	127090000	107520000	109720000	119940000	110420000	141980000	115000000	95030000	116580000	105710000	100630000	100080000	110290000	94597000	123690000	119840000	116030000	121290000	87344000	127710000	84521000	119260000	133220000	148900000	131370000	105260000	137900000
0	0	4460900	5691000	3670700	6454300	4624700	4219500	4902800	5446000	5681400	7712500	0	11717000	3853100	5572000	7178700	4506500	2799500	4015600	4939200	0	6768900	4401400	0	0	3818500	3843700	5664400	4893100	5688300	5561400	5733200	0	6247700	2710800	4038100	4052700	5827100	8498000	0	4002400	4030800	0	4725200	4240400	5296400	3462300	0	0
2270600	0	1254400	1726700	2803000	1447700	1269900	2197200	0	1534400	1007800	1484600	1389000	2182400	0	0	2609700	0	2302800	1748900	2431300	1291200	937610	1759100	1965100	0	0	1345400	1849800	0	1366400	1241500	1183500	1439300	2073500	0	1424600	1667700	0	2393700	1363700	1248900	1701600	1115300	0	0	0	1969500	1743600	1290500
0	3548000	4660700	5216400	0	0	0	0	2435800	0	0	3291300	0	3901100	0	5373500	2033000	0	11500000	4782700	0	0	4130100	0	2554500	4081700	6880300	5687700	3660500	0	4271800	4939600	0	0	0	3704700	0	0	0	5960600	0	3346700	3488300	7568300	3216600	0	0	0	0	4701900
5277500	4023600	5929900	13828000	4603200	4544400	5020700	4670400	3412800	3923200	3399400	0	5707400	4734300	6238400	12645000	5799500	5407600	12329000	6586700	3231800	3182400	7441500	5371000	6128500	4896800	9067300	0	4921300	5468900	13294000	8475500	4364700	5919300	5473600	0	6637700	5011200	6479900	0	0	6067500	6322600	0	4341300	7299500	8329700	3448500	0	7334800
0	2987500	3745700	3286100	0	5365000	3130600	2779000	2051300	4153300	4363400	5198200	0	3428900	3166000	4356700	2750300	1715300	5945600	3276600	3981800	4534400	4761600	3500100	2227900	2237700	5610000	3573600	2402100	9758300	3960300	3509900	0	4076700	4173200	6267600	694060	5207100	3618300	4539600	0	2422300	3968600	9936500	0	3200000	0	7242600	437270	2889500
6343600128	7340299776	7506999808	6644800000	6736099840	7381899776	7091400192	6919300096	6543699968	8049800192	6783399936	7647799808	6431399936	6317799936	7150900224	6266800128	6539100160	7784600064	7647499776	6716100096	6569500160	7722599936	6788700160	6438900224	7964499968	8395400192	8480300032	6699400192	7051899904	7761900032	7454300160	6675999744	5432699904	6381599744	6600900096	7643700224	5730400256	7643599872	7005300224	7451400192	6193500160	7695300096	7347700224	6950000128	6935600128	6731100160	7359699968	6903199744	5114100224	6313500160
40630000	56508000	9804100	12841000	0	0	0	0	0	0	0	0	0	0	0	0	0	0	0	0	0	0	0	0	0	0	0	0	0	0	0	0	0	0	0	0	7403600	0	0	0	0	0	0	0	0	8793100	5225800	0	0	0
10970999808	8786499584	9818099712	9997700096	8253499904	9334099968	9765900288	9507000320	9342400512	10924000256	10231000064	11121999872	7859800064	9776900096	8867900416	9111000064	9178600448	7858999808	10323000320	9701900288	9144599552	8252899840	8950500352	10711000064	9184799744	10620000256	10282000384	10168999936	8356800000	11043999744	9183399936	10280999936	10689000448	11429999616	13169000448	12355000320	10922999808	11569000448	11507999744	12858999808	10090999808	9968799744	9681300480	12848000000	9327399936	8499800064	8731899904	12300000256	10896000000	10771000320
110050000	140110000	130210000	120420000	114460000	119310000	127280000	109640000	120030000	162280000	152890000	145270000	88156000	135240000	116700000	126690000	149120000	163950000	112590000	145320000	126810000	143980000	160150000	133210000	94124000	99355000	133790000	107100000	164640000	123190000	127890000	133900000	147460000	108510000	131020000	172940000	122400000	147660000	125880000	111880000	111140000	173220000	140200000	112820000	134720000	125890000	122520000	117360000	156960000	124600000
0	0	0	0	0	0	0	0	2251600	0	0	0	0	0	0	0	0	0	0	0	0	0	0	0	0	0	0	0	0	0	0	0	0	0	0	0	0	0	0	0	0	0	2255400	0	0	0	0	0	2928300	0
663049984	622140032	547340032	440440000	519809984	488569984	426980000	362960000	367430016	275670016	344460000	405929984	431590016	465769984	441060000	341809984	470480000	524729984	283020000	305089984	456289984	437960000	507300000	375150016	528720000	469649984	356600000	397430016	398000000	555430016	386740000	373790016	512620000	448700000	300720000	293860000	498560000	376769984	432560000	302950016	504600000	471960000	387790016	329630016	552979968	500820000	433510016	311640000	481640000	391480000
31272000	29285000	24137000	33915000	24445000	24777000	30414000	24725000	32954000	34739000	29337000	23071000	24082000	28069000	33393000	25795000	31506000	31807000	33387000	46330000	29675000	26741000	24618000	25285000	27106000	30479000	23036000	28150000	31964000	20939000	24157000	31763000	21227000	28958000	35127000	25312000	20996000	27099000	33074000	10064000	19802000	29220000	22483000	36437000	34112000	24864000	31192000	16254000	30358000	18915000
78041000	63544000	73058000	76575000	86478000	82256000	105640000	91232000	6853400	30434000	27264000	28430000	10796000	22917000	31584000	27371000	29539000	38801000	38895000	41052000	13426000	5116800	8815800	9415600	30053000	28897000	31829000	24458000	39305000	44424000	34208000	29580000	103940000	86576000	109250000	95967000	36576000	38245000	53668000	38237000	49743000	44436000	63749000	40748000	5245200	1999500	3709400	1455300	250160000	245600000
6851700224	5213799936	7724100096	8365199872	8297500160	8156299776	11520000000	11301000192	7464000000	2815500032	2127500032	11994999808	6565899776	4729600000	5535799808	7658299904	7457999872	4925300224	15212999680	11610999808	6007900160	8700000256	9866099712	9765399552	7545699840	7098800128	2790099968	7163100160	2819800064	5796700160	8525400064	12568000512	7234599936	4543200256	10078999552	11253000192	8630099968	7372700160	4897500160	3288900096	7681500160	3313400064	6082299904	15649000448	8801699840	6851299840	7089600000	2862500096	5860599808	5553200128
122180000	107170000	129870000	124570000	121940000	172940000	137100000	159200000	101870000	93791000	91069000	98895000	88819000	124020000	90190000	96687000	109600000	127860000	119410000	114270000	103120000	139860000	108520000	162920000	87967000	116900000	144790000	118920000	126380000	121430000	176390000	135780000	90898000	124940000	79917000	67806000	91423000	106900000	113800000	110820000	92214000	84543000	80896000	103130000	78154000	112660000	158700000	109630000	79972000	82070000
357870016	434889984	471430016	433089984	594460032	539139968	421710016	446510016	230750000	318449984	313060000	327409984	367320000	304480000	322740000	332849984	305800000	441270016	430830016	314350016	497609984	340500000	398500000	337649984	309950016	312620000	341120000	382440000	293140000	477620000	401460000	359340000	277520000	262670000	327460000	340520000	255920000	263120000	347540000	339740000	271830016	242010000	329369984	310990016	309110016	297089984	401310016	301209984	236990000	237390000
185180000	158030000	168650000	158970000	141790000	194630000	147360000	178690000	210850000	143950000	214600000	201280000	182810000	149060000	164600000	179410000	234150000	182330000	218640000	245850000	162590000	161960000	177640000	179580000	162050000	190240000	190130000	165580000	160660000	176100000	152050000	169900000	162610000	227290000	198400000	168280000	146510000	196990000	158420000	169370000	185490000	202270000	219960000	232900000	204710000	191130000	177180000	156810000	140070000	182720000
230130000	343529984	324449984	333889984	204270000	285420000	284769984	320240000	229060000	246230000	197880000	269660000	191380000	286300000	217440000	347270016	314820000	268980000	259760000	282500000	257740000	301300000	305080000	284900000	269920000	281780000	268640000	292700000	295760000	345320000	296580000	275440000	288140000	233090000	255890000	287900000	205990000	325849984	215170000	278920000	262460000	481320000	276430016	272750016	299390016	389560000	285640000	279480000	263640000	311940000
1604499968	1446800000	1498300032	1821799936	1518499968	1728600064	1882400000	1686000000	1171200000	1588099968	1515699968	1440700032	1165699968	1436000000	1995699968	1801900032	1543500032	1450400000	1784600064	1680999936	1563200000	1356700032	1753200000	1640899968	1561699968	1846200064	1618300032	1710700032	1671200000	1774400000	1612499968	1372499968	1448000000	1470000000	1571100032	1384199936	1923900032	1750300032	1505900032	1690800000	1335000064	1381100032	1674800000	1447800064	1602400000	1586599936	1906099968	1704600064	1537799936	1870800000
16820000	20502000	28375000	42912000	20365000	29735000	17523000	23238000	22285000	49088000	23850000	21457000	18847000	25736000	15157000	26328000	22135000	26233000	29234000	22225000	17537000	21860000	17699000	0	18078000	28587000	20932000	20603000	22336000	14695000	23344000	29522000	22879000	34392000	19705000	11132000	30919000	24441000	53172000	19662000	25309000	24914000	14879000	21031000	22953000	30983000	53295000	24682000	23216000	15202000
17063000	36566000	26963000	19020000	26470000	27118000	25332000	16668000	27829000	22302000	13388000	22093000	32201000	38646000	10520000	25833000	22879000	20320000	19814000	20539000	44234000	27442000	21510000	25131000	25574000	26582000	18846000	22047000	36989000	21307000	30125000	24274000	30802000	38170000	18526000	17129000	16160000	35507000	21774000	18945000	26496000	27692000	25872000	21021000	32728000	30945000	24321000	17538000	28976000	26842000
279660000	278929984	264220000	269910016	298220000	241810000	285070016	244530000	246470000	259120000	232700000	258800000	237810000	271680000	295590016	262180000	290200000	265160000	270910016	250260000	275790016	263760000	219000000	237350000	272190016	327540000	307590016	279830016	268889984	308910016	395440000	273350016	266140000	281540000	244100000	233170000	210680000	264720000	219340000	277990016	275150016	317249984	276689984	325910016	256520000	267560000	264690000	400900000	249180000	261890000
0	0	0	0	0	0	4422700	0	0	0	0	0	0	0	0	0	0	0	0	0	850050	0	0	0	1116900	0	0	0	0	0	0	0	0	0	0	0	0	0	0	0	0	1080700	0	0	0	0	0	0	0	3161500
7825900	0	0	3014300	0	0	3105900	0	5404100	0	0	0	5729000	0	0	4513400	9683400	0	6532800	9001100	10016000	5585700	4692900	0	8196100	2693100	3722200	7155100	11784000	3259200	8320700	6939700	0	0	0	0	7775300	7670400	0	0	0	0	0	0	8264100	7224600	0	2812700	0	8203600
2569499904	3084699904	2497600000	3143800064	2410700032	2168199936	2689400064	2967500032	2381700096	2703099904	2611599872	2861700096	2334000128	2322899968	2520999936	2858400000	1848999936	2523699968	2717400064	2856300032	2441999872	2647399936	3152499968	3205700096	2596100096	2702700032	3594200064	3117100032	2849400064	3009499904	3106599936	3107500032	2777900032	2809100032	3350299904	4203099904	3199399936	2851000064	3402800128	3610299904	2352000000	2862700032	3052900096	3344699904	2933700096	2999399936	3777400064	3836300032	3056000000	2777900032
0	0	0	5486900	0	0	0	0	0	0	2277600	0	0	0	0	0	0	0	0	2953700	0	0	0	3050600	0	0	0	2881700	0	0	0	3754700	0	0	0	0	0	0	0	0	0	0	0	11409000	0	0	4842400	0	0	0
0	0	0	0	0	0	0	0	0	0	0	0	0	0	0	0	0	0	0	0	0	0	0	0	0	0	0	0	0	0	0	3841500	0	0	0	0	0	0	0	0	0	0	0	0	0	0	0	0	940230	0
91221000	88345000	70810000	97811000	90264000	101890000	86833000	109650000	78007000	96890000	83638000	113520000	89173000	114510000	81888000	86955000	99672000	111370000	86383000	100570000	105190000	95558000	103920000	111700000	93370000	80695000	93096000	70312000	91895000	72357000	94528000	83193000	87051000	74865000	69126000	100410000	91526000	90538000	62893000	77216000	85330000	87925000	87737000	57939000	81992000	97880000	73881000	71613000	54035000	76106000
54085000	72793000	92807000	60298000	80230000	73585000	52376000	84289000	50205000	125710000	67555000	61739000	68585000	89563000	51447000	75022000	98999000	68127000	101360000	64021000	96721000	58902000	80396000	83091000	121190000	49490000	72454000	94376000	51813000	57316000	47711000	64329000	65812000	73190000	92842000	86309000	71055000	53244000	78232000	58510000	53361000	81468000	89188000	44771000	43709000	54148000	75154000	37045000	88930000	61550000
40410000	37212000	42957000	49712000	35613000	27730000	40796000	45914000	35734000	22834000	23018000	26718000	47097000	39601000	32884000	39917000	29990000	28491000	38190000	35601000	37267000	48906000	40649000	39340000	24088000	25870000	16714000	21445000	23429000	21714000	24114000	23765000	38888000	32246000	45517000	45670000	45110000	48585000	42728000	50379000	25185000	21033000	23211000	15778000	23191000	13974000	25277000	20423000	53898000	39185000
0	4217300	0	5223800	0	3310800	4351200	4205200	4282500	2877800	10379000	6003700	0	3524300	4574100	7924000	0	3303000	5062600	5835100	2258900	2670700	0	4510200	2934400	2134500	3624700	5308200	2388000	3046300	4782900	7957300	3258500	2937800	5616400	7364400	3812200	2541400	4061100	5923500	2999200	2967100	3898900	3252500	3268800	4008800	4632800	6392300	0	1912400
768620032	745360000	783440000	793169984	832160000	852350016	750640000	818110016	823800000	647190016	754760000	871710016	943070016	702160000	636169984	838809984	750860032	865240000	804019968	684870016	785190016	639920000	629820032	698630016	694280000	689100032	694169984	651209984	819720000	787640000	817720000	879640000	845640000	717710016	716289984	911500032	746249984	783920000	834480000	883020032	818460032	702120000	725449984	643950016	773089984	833009984	747830016	871129984	715500032	711280000
5695500	5721100	2288500	2859700	3040600	2913800	3615800	0	4752400	3654700	0	1361300	0	2893000	3997100	4069500	4439300	4743000	2895700	3547000	3699900	5413100	3802600	3472100	6113700	6011500	4924300	4012500	5209100	4007300	5091300	6267800	6706400	6910500	5855700	5047800	7240300	4873300	3375300	2852700	4688900	7404400	4565900	0	3899700	6549800	4789500	0	8106600	7830500
9687300	2672200	2769300	0	2736800	2431500	1579900	0	0	5034800	1319100	0	6396800	1556800	1766300	0	8924800	0	0	0	9952900	2189600	4480600	0	3502300	0	0	0	6352800	2273800	0	0	7777600	2099800	3466900	0	0	1416900	2156300	0	7726100	4309300	3213300	0	4226200	1911700	0	0	9403500	3018300
44865000	45297000	60121000	57317000	58606000	98826000	68365000	64707000	42487000	50120000	48799000	69019000	61203000	63747000	55024000	93874000	52848000	102120000	57658000	50943000	44916000	59858000	57315000	54633000	51795000	58305000	71438000	66057000	40267000	68906000	60049000	49516000	43987000	25566000	50065000	88233000	42165000	36303000	37339000	49909000	60388000	56506000	58157000	44678000	42807000	50863000	46488000	42906000	66364000	55702000
107260000	166740000	95841000	85268000	113640000	80452000	107900000	78386000	82912000	128640000	103810000	125670000	80328000	100290000	125300000	128650000	95232000	122430000	93967000	142730000	130610000	90504000	81168000	105160000	91332000	74993000	79955000	118270000	120520000	80400000	88130000	192500000	112420000	95862000	107520000	93342000	98505000	105820000	154270000	116830000	113780000	78465000	74869000	75154000	118830000	119680000	109550000	96229000	72878000	63729000
0	0	0	0	0	0	0	0	0	0	0	0	0	0	0	0	0	1106800	0	0	0	0	0	0	0	0	0	0	0	0	0	0	0	0	0	0	0	0	0	0	0	0	0	0	0	0	0	0	0	0
19735000	13431000	30959000	15124000	16467000	10746000	13715000	28488000	15657000	12549000	10641000	15894000	14309000	15301000	13540000	19047000	11552000	21919000	12277000	13174000	13188000	8053600	17661000	13877000	9167400	14357000	12686000	14472000	14391000	11062000	18349000	18117000	18019000	10411000	17075000	16276000	14693000	11002000	14635000	14226000	15708000	7899500	9038000	18480000	19621000	14934000	0	15388000	10543000	15925000
9694200	9068800	13791000	9227400	9809300	8721600	10904000	16478000	7888500	8349900	18285000	12233000	6076900	10092000	7824600	15020000	6939900	8895100	0	17949000	8183100	10438000	10325000	18201000	6929200	18074000	8591800	11257000	9362500	12221000	11061000	14165000	42746000	12922000	7712600	29034000	7989300	10253000	0	20762000	8498800	11608000	10013000	29170000	4711400	10806000	10424000	14713000	5552100	8276100
67398000	58326000	112540000	0	45068000	46692000	72182000	156770000	100560000	66440000	104680000	0	63016000	49583000	93054000	170290000	48844000	81505000	76850000	142990000	72519000	71813000	83163000	87025000	69540000	68089000	99910000	5877000	88241000	99177000	57951000	148160000	79526000	77955000	91441000	35349000	63697000	93402000	72479000	90271000	60940000	44592000	82120000	105100000	53993000	85683000	91833000	76467000	41495000	94243000
348500000	276990016	270270016	258880000	309460000	268950016	286870016	328680000	329080000	331289984	254990000	337200000	309470016	349310016	311750016	252320000	332289984	321040000	297140000	348230016	335300000	336180000	324060000	308169984	275409984	318520000	300960000	267940000	268070000	327160000	293950016	249970000	431440000	384750016	433529984	291209984	324649984	242780000	299350016	275740000	418670016	401649984	357990016	305430016	278430016	243580000	207620000	177150000	732569984	702640000
3608100096	4755400192	5231300096	5011200000	7750700032	8066100224	8956499968	9385400320	1952400000	2079500032	2340400128	2421400064	2692800000	2968600064	3376600064	3546500096	1650099968	1898200064	2313600000	2243500032	1509799936	1535200000	1872199936	2102200064	1535900032	1453600000	1721100032	1814000000	2909700096	3448199936	3516400128	3576600064	5747599872	6732700160	7617800192	8584699904	3827800064	3890700032	4586599936	5270000128	2220199936	2699899904	2685299968	3144800000	1605400064	2012999936	2093699968	2173900032	9751000064	8809600000
218230000	224230000	242800000	263430000	247880000	213030000	232510000	225140000	245920000	253840000	257150000	265170000	233350000	197710000	282440000	252870000	281190016	296969984	194570000	253820000	422430016	247860000	229060000	286569984	215540000	209110000	278700000	268060000	230190000	240490000	270080000	260930000	201470000	242330000	328980000	252760000	228220000	270230016	221640000	218120000	246580000	281760000	243050000	241220000	208240000	197350000	218520000	217670000	300529984	262200000
0	0	0	0	0	0	0	0	3346700	0	0	1966600	0	0	0	0	0	0	0	0	0	1910600	0	0	737540	3154700	0	0	0	4401200	0	0	0	3618500	0	0	0	6837000	0	0	0	0	0	0	0	0	0	0	0	0
1922800000	1419000064	1954599936	1325500032	1685699968	1720199936	1851900032	1797699968	1778700032	1827600000	1766599936	1630000000	1556400000	2097699968	2056499968	1679399936	1590400000	1687299968	1495600000	1692999936	1924999936	1652499968	1990400000	1816899968	1676300032	1943299968	1984499968	1704899968	1833100032	1996499968	2378299904	1502200064	2040700032	1315600000	1560899968	1507000064	1826700032	1731000064	1847299968	2188000000	1659500032	1498000000	1632499968	1931000064	2205900032	1702800000	2672199936	2668600064	1702499968	1286300032
11463000	18096000	13212000	9072200	11844000	8997100	8669100	10261000	12304000	20373000	16224000	15122000	13882000	8154300	12417000	12036000	7550200	13959000	9085900	13465000	8332300	13077000	15127000	10704000	8237100	7682900	17769000	15888000	11922000	10466000	13541000	15163000	27603000	19297000	15895000	11859000	15411000	12103000	10569000	13501000	14749000	23107000	11972000	10878000	10570000	13452000	11959000	15290000	14700000	16660000
0	6095900	9603100	4538600	0	4081400	8099500	4536700	6939800	11897000	0	9339200	0	7136100	6473700	4736300	0	5716700	5532700	5313200	0	0	7351800	6198800	4753200	0	5542800	4075200	5536300	0	5142800	7899600	0	5577200	8017300	5327800	0	0	0	5254500	0	6515400	7441100	2872400	0	5158900	0	3672700	0	0
36322000	43980000	36126000	33085000	57107000	37514000	43016000	44349000	44959000	39198000	65838000	23087000	48524000	45016000	33395000	41387000	27351000	52722000	45572000	43719000	41583000	56702000	41230000	53075000	39549000	41135000	25089000	46998000	47664000	44380000	50919000	43938000	42064000	36985000	48461000	43770000	51957000	13094000	54230000	38389000	27582000	30157000	19688000	24940000	30267000	29383000	25435000	47541000	44884000	48838000
46316000	62199000	80202000	84201000	48656000	58124000	83166000	93626000	54678000	71218000	101570000	119650000	58092000	65071000	86901000	85924000	45197000	47249000	87552000	83421000	47138000	48798000	79781000	96685000	50095000	52976000	75104000	84143000	48922000	74067000	79185000	102470000	42767000	44498000	84751000	115220000	62172000	59896000	77210000	125470000	63267000	58933000	76708000	108410000	59559000	47011000	73296000	98729000	50980000	65468000
9886500	17390000	12879000	19917000	16135000	23951000	19844000	28124000	13240000	14541000	16448000	18258000	11785000	13493000	17935000	17523000	14603000	29157000	32555000	25942000	13382000	17316000	11040000	12533000	31335000	22025000	18006000	24529000	15883000	17502000	14684000	12882000	21425000	26891000	16744000	20434000	13101000	28358000	14845000	31832000	10746000	13634000	21657000	10663000	9004300	16686000	11262000	12914000	7685800	12532000
828499968	838649984	786270016	1141900032	946249984	1032800000	990960000	805200000	933590016	1011900032	869840000	918089984	842920000	1120400000	1115200000	1086300032	890120000	902800000	1318700032	1046099968	961649984	1014000000	1022000000	907200000	874620032	837080000	945329984	1138099968	726849984	1000800000	855510016	945939968	699729984	698659968	870870016	1075900032	819720000	931040000	986790016	988230016	830950016	920329984	872430016	1065900032	887760000	982689984	824630016	1014700032	661649984	597270016
84382000	37251000	62586000	75580000	54135000	51958000	103260000	73336000	54134000	60555000	101010000	47062000	10098000	11268000	9220000	0	17194000	0	18238000	0	66623000	53539000	82655000	51743000	64796000	32438000	58217000	52314000	40944000	75543000	38871000	44298000	63062000	46482000	28340000	62007000	49366000	39057000	58843000	78925000	65899000	27334000	37588000	51949000	48109000	45533000	36402000	63325000	59372000	34959000
12245000	5851800	0	7269100	8824800	7347300	7637800	8261800	7494400	0	12019000	10479000	9222000	8521700	12053000	19644000	15238000	11253000	26331000	17717000	20950000	0	12039000	9501300	9665200	11990000	9265200	12867000	14961000	7234800	11676000	13622000	20239000	16491000	21711000	15133000	18679000	11984000	15509000	12830000	14577000	13624000	17551000	12949000	10962000	10293000	21149000	13119000	27542000	30179000
0	0	0	1726700	654750	758540	0	0	0	539760	0	0	0	0	171910	1018400	0	780890	1157600	641750	0	1148600	817660	1287800	2239200	832020	1023400	1002200	0	977110	850790	1449600	0	2083400	0	1274400	0	802770	1109000	2573900	0	1136700	1253300	0	0	0	891180	1019000	0	0
10745000	8293400	0	21777000	13260000	12105000	0	0	23275000	10868000	11459000	28033000	18201000	19710000	20318000	0	0	14701000	15038000	17505000	0	11925000	16840000	0	9481900	16047000	15598000	11961000	17939000	12665000	12079000	22156000	5436900	15751000	11769000	22155000	7332700	11504000	13380000	45179000	7205100	6342600	10621000	16004000	0	0	0	18210000	15385000	5505100
866390016	1030300032	1112000000	1118300032	1489200000	1846899968	1881699968	1907299968	533070016	442600000	576310016	684240000	761689984	722819968	756320000	895120000	517230016	515569984	588920000	679400000	528590016	627910016	510910016	629009984	390209984	414840000	492350016	409809984	790960000	816990016	759209984	849400000	1156700032	1417500032	1479800064	2049100032	986940032	1043500032	1176199936	1337600000	564720000	710520000	720310016	848310016	695830016	655049984	719150016	760070016	1807900032	2077100032
288940000	337529984	327169984	228880000	336630016	238370000	301310016	209590000	231790000	264560000	449030016	261920000	307489984	335070016	298060000	281900000	319769984	289969984	187560000	272350016	360180000	326190016	291860000	259390000	341830016	263560000	270100000	285950016	295129984	321950016	259350000	283720000	303760000	322340000	406329984	251280000	260860000	341080000	333700000	257310000	254110000	284369984	280169984	280400000	345849984	392280000	310780000	254210000	279329984	273800000
32144000	21027000	20241000	24037000	20424000	19920000	19615000	17224000	17632000	33807000	15965000	15873000	19957000	26980000	20223000	16970000	21619000	17021000	24912000	19312000	23735000	19618000	17869000	18880000	21018000	36317000	20237000	17735000	18903000	45458000	17363000	21511000	18379000	24469000	22941000	13934000	18026000	22512000	20082000	16062000	23597000	23239000	20983000	18167000	25512000	18917000	21218000	17856000	33965000	35223000
105370000	99768000	97989000	90853000	97726000	88036000	99693000	87351000	80068000	80525000	85301000	90292000	99251000	86131000	83152000	94829000	96468000	98636000	108260000	75847000	78252000	107910000	88555000	91768000	98741000	93734000	117070000	81926000	88251000	88509000	112230000	116130000	102460000	103320000	77065000	87278000	116050000	78915000	96129000	82597000	117850000	112500000	79477000	80608000	107220000	133470000	106710000	90193000	89106000	88655000
55670000	56766000	29341000	38925000	47340000	57099000	39540000	40401000	47012000	40469000	38535000	15077000	52345000	38383000	43901000	36816000	50890000	48609000	54759000	39314000	54907000	47733000	34504000	35912000	53045000	43423000	38742000	35383000	45774000	38233000	38767000	39990000	68441000	65134000	51252000	45302000	35384000	48780000	34069000	26682000	54671000	53908000	40480000	29654000	40569000	44609000	35891000	32280000	47892000	48899000
3406400000	2840000000	2923800064	2520399872	2960999936	2580600064	2932600064	3211699968	2278799872	2487399936	2408499968	2875899904	2372999936	2895000064	2724199936	2701100032	1969900032	2078000000	3062000128	2946299904	2826899968	2453499904	3160800000	3102200064	3050800128	3022000128	3002800128	2650700032	3018500096	2860100096	2790700032	2869499904	2818299904	3044900096	2563500032	2287399936	3810599936	2847600128	3316800000	3096399872	2402400000	2259899904	2475699968	2075500032	2719399936	3261199872	2576000000	2955899904	2328900096	2377600000
9109200	16539000	22173000	29589000	12064000	18111000	26195000	33738000	14550000	13023000	35446000	38907000	7752100	21006000	21039000	25648000	10868000	12090000	33032000	39480000	10256000	17072000	20191000	33995000	12679000	17384000	27556000	41436000	11091000	23303000	28207000	37177000	0	15064000	24890000	36103000	14326000	8786000	22543000	40550000	12210000	16698000	24912000	52910000	11216000	11532000	19767000	60150000	0	21718000
0	2138500	0	0	0	0	0	0	0	0	0	0	0	0	0	0	0	0	0	0	0	0	0	0	0	0	3431100	6192100	3930600	4016900	4893400	4578200	0	5482500	0	7099600	0	5859100	0	0	0	1865400	2947200	0	0	0	0	0	0	0
4783600	5692600	6624600	9309900	7306100	0	5446200	9109300	15178000	12924000	11430000	10284000	9989500	10666000	6905400	7590600	5315100	8270900	7189100	7292000	9733300	982690	9922800	8597500	0	5986600	13123000	5584100	10045000	0	7231800	7259200	10183000	13257000	8296300	8219000	9994000	6288600	7460200	7851300	11951000	8332800	5865700	6862200	0	7937800	10044000	5226000	10487000	9002100
1680300	1676000	3624400	1791000	0	1535200	0	0	2651100	3024100	0	0	0	986390	1378900	2102400	0	1098200	3244600	1198100	0	1730300	0	2650300	1447700	659600	1472900	1199900	1094000	0	0	0	0	1548000	1341800	0	1409600	1822500	1480200	0	0	0	1627300	0	984360	2421800	0	805850	0	0
62831000	35579000	36632000	73330000	50331000	72952000	32022000	25325000	48965000	45257000	0	51568000	41492000	41573000	56401000	53104000	53819000	75591000	56602000	43578000	39698000	45485000	57835000	39647000	63687000	83874000	51308000	42337000	30332000	88951000	49894000	45898000	55814000	65098000	65473000	66594000	20863000	32735000	56957000	78036000	67630000	56484000	71015000	95559000	45311000	58191000	0	46096000	30099000	27815000
1314400000	2281799936	2273999872	1351600000	1766300032	2552300032	1986400000	1809699968	1860800000	2469900032	2550700032	2314700032	1497699968	3459599872	1929200000	1646499968	2002499968	2213199872	2093900032	1410899968	1698300032	2177600000	2095600000	2012600064	1841799936	1985799936	1931100032	1809400064	1967900032	2371899904	1589500032	1755299968	1359000064	2356600064	2036099968	1914599936	1442499968	1798499968	2308999936	1750200064	1493100032	1536999936	1869600000	1964099968	1379000064	1946700032	1868800000	1365200000	842249984	1099299968
13641000	11370000	11246000	9997100	9553000	0	7970300	10645000	8982800	0	11610000	6686000	21479000	12045000	13298000	8280500	12815000	6662200	9876800	8050100	9396900	8009500	13442000	9082700	13247000	21977000	14749000	12148000	13518000	11628000	12797000	7631400	15000000	16824000	8484600	8568900	14712000	10110000	22123000	11581000	11774000	14108000	11378000	17524000	12421000	12394000	56698000	8469200	12696000	11626000
46676000	70560000	111690000	81119000	51641000	47644000	51771000	64012000	47797000	95544000	77672000	127450000	45273000	76694000	39659000	88983000	44182000	34304000	41653000	72767000	56455000	72239000	70899000	80722000	39513000	53771000	76841000	108240000	55782000	95290000	67885000	124390000	46308000	111290000	57487000	101730000	41685000	78036000	25178000	73683000	67766000	78677000	52971000	96255000	72201000	80156000	5003900	92551000	70186000	93030000
571430016	478120000	611390016	567529984	430369984	448849984	583910016	485740000	421640000	522540000	580120000	490169984	532190016	451440000	511910016	555120000	454569984	557510016	451870016	547849984	563420032	489760000	531360000	479729984	563289984	537480000	675270016	602300032	519609984	534680000	545379968	589120000	508350016	535870016	440980000	506540000	551769984	539249984	557960000	647990016	408480000	468769984	508820000	585249984	450600000	471660000	524030016	537230016	505640000	463809984
19193000	26178000	46409000	40325000	23751000	35061000	50368000	46396000	21686000	28423000	48279000	54744000	17536000	29178000	43984000	39418000	17168000	32543000	54206000	54271000	23767000	25822000	41039000	41482000	22533000	35687000	41815000	54590000	19558000	31068000	38586000	66572000	12846000	20367000	39523000	54431000	18174000	28413000	45500000	69229000	21037000	29327000	45634000	66539000	17316000	36384000	38483000	65072000	16066000	18745000
271230016	288160000	271120000	306489984	216320000	224740000	267660000	224990000	213910000	249790000	203630000	261440000	237500000	257330000	240160000	251770000	264800000	358820000	260580000	284140000	279310016	382689984	250870000	275289984	274849984	318750016	289209984	280550016	320720000	303420000	288249984	215990000	269960000	247950000	216930000	189460000	253620000	239910000	278750016	205650000	205730000	276649984	257070000	168360000	334300000	344870016	285040000	203910000	185540000	211770000
0	0	0	0	1292200	906350	1545500	0	0	0	0	0	1901800	892730	2407100	0	0	0	0	0	1460000	0	1859500	0	0	0	0	0	0	0	0	0	0	0	0	0	0	0	0	0	0	0	0	0	0	0	0	0	1746000	723520
608609984	691910016	892689984	813249984	636169984	815790016	740880000	1031500032	946760000	1029100032	965870016	1247299968	693699968	769009984	991059968	1139200000	758099968	761590016	923510016	1141100032	729299968	789120000	1005400000	1074400000	872019968	793820032	785640000	842729984	624510016	985249984	915960000	834630016	633929984	790920000	851049984	922830016	517969984	742190016	910310016	978950016	713430016	670910016	740049984	901200000	676609984	631809984	943849984	1035900032	952720000	1056700032
195370000	276600000	234470000	334169984	160690000	197090000	217060000	306000000	309380000	270300000	562880000	686369984	188650000	254090000	324489984	332830016	181790000	324390016	379990016	334369984	239690000	263530000	299020000	401569984	262500000	308460000	364830016	437390016	232430000	323240000	312000000	615100032	196890000	298740000	354129984	400080000	184040000	255700000	292140000	451449984	248440000	288600000	283180000	342729984	229760000	314969984	304649984	420720000	127680000	183600000
255620000	315689984	328769984	310680000	272920000	306120000	308620000	297520000	244310000	262330000	318310016	301160000	304169984	306510016	368920000	332070016	326689984	336760000	334460000	351649984	280120000	297980000	308430016	315700000	233900000	315720000	323529984	290609984	281820000	333270016	280780000	288070016	302889984	300920000	413009984	377280000	282950016	288510016	379409984	242230000	237870000	258880000	291449984	257520000	223050000	292870016	262010000	224330000	280529984	296080000
956280000	1104199936	1175699968	1141299968	1058499968	1140800000	1020000000	1019299968	1079800064	1257500032	1222800000	1204199936	1016000000	1190099968	1066400000	1046899968	1158599936	949560000	1281699968	1187900032	971440000	1057600000	1101500032	1275200000	1151600000	1171299968	1208099968	1270800000	1210200064	1263299968	1408300032	1284800000	1210000000	1030400000	1099200000	1146200064	1008899968	1056000000	1096099968	1280000000	1116000000	1021500032	1202000000	1338700032	1187200000	1115299968	1130499968	1559800064	960969984	794840000
1053299968	1151900032	988489984	1101600000	912710016	1118800000	1061500032	1174300032	1029900032	1089799936	1239699968	1262400000	854739968	1114700032	1024099968	1012600000	1174400000	1187800064	1281699968	1187500032	876099968	1022600000	1076999936	1008200000	902750016	924089984	922979968	1002800000	907409984	986630016	1075399936	1151299968	967080000	1050800000	992870016	1275399936	876899968	1081699968	1089100032	1129699968	989310016	1139299968	1039200000	1157699968	911990016	1109900032	1177100032	1209400064	1088400000	930030016
18908000	20909000	23856000	22932000	21311000	16305000	29334000	13372000	19773000	22409000	24259000	20091000	0	19528000	24106000	21325000	18063000	36666000	21879000	19774000	23406000	17937000	21655000	22148000	19701000	18734000	38793000	21161000	18564000	17948000	35600000	22155000	19741000	23266000	27108000	19470000	31804000	19579000	15991000	19788000	12026000	10221000	17528000	14959000	23585000	16002000	15969000	15288000	30520000	18427000
62619000	79343000	59451000	66232000	74795000	58845000	105140000	83246000	64017000	69410000	72720000	66681000	65647000	74051000	91817000	78808000	71659000	78066000	83825000	75333000	89879000	78082000	81965000	72861000	67589000	69744000	63213000	78507000	70153000	73518000	79440000	78261000	65098000	55844000	77441000	81169000	67215000	83891000	63927000	109550000	76682000	40443000	66055000	73088000	81151000	55321000	72291000	83080000	54669000	32085000
3546899968	3972000000	3821199872	4578100224	3781100032	4036000000	4254200064	4230899968	3617600000	3878299904	4379100160	3887500032	3707500032	4519499776	4153400064	4757400064	3318000128	3957199872	4471499776	4521099776	4103899904	4152499968	4218700032	4542499840	4266200064	4139899904	4229400064	4663199744	4331700224	4270200064	4325300224	4440800256	3572699904	4008100096	4003500032	4508800000	3447099904	4315800064	4362100224	5147500032	3485799936	4517799936	4542499840	4321699840	3805799936	4297699840	4782099968	4542099968	3212900096	3501600000
470640000	431160000	497780000	472000000	422600000	365880000	519209984	461960000	460969984	466860000	439830016	337350016	492449984	398240000	480630016	548769984	562110016	453680000	445929984	548990016	710710016	401340000	387350016	408990016	636320000	434460000	629480000	445360000	476380000	430860000	511910016	566800000	436840000	426000000	432950016	494180000	463340000	429670016	498510016	554920000	447270016	616760000	438350016	424980000	420000000	467340000	621529984	515820000	315940000	423710016
7952100	7534300	11744000	13413000	3689400	8301200	12807000	15962000	8825700	8399400	8055400	14224000	5856000	9270600	12881000	12817000	3856500	6362800	10024000	14520000	7767400	11194000	11485000	10898000	8669400	4624600	11782000	11851000	7322600	12230000	8308700	11122000	2931900	5859000	8068800	11540000	7834800	9669800	7973000	14894000	6207600	6508800	11050000	11615000	4615100	0	13242000	7375000	10774000	14558000
7333500	9088700	7070200	8219800	12676000	5906600	9403100	5251000	0	5512800	0	0	13694000	12193000	11252000	6648200	5839600	5516800	6244700	5910400	10165000	0	7462300	8110800	0	6947600	5631200	6082600	0	11338000	6084000	7769100	16828000	6216700	16723000	4249800	12108000	8672900	0	4351100	8460500	12244000	7706200	9693300	9631700	7403600	9066000	0	10231000	9023000
186950000	164360000	126640000	160130000	163810000	141300000	138980000	154970000	178050000	178300000	132280000	162990000	199060000	164830000	125670000	152910000	155920000	174900000	126090000	162110000	208410000	162210000	136940000	132600000	181780000	166380000	188850000	176820000	183780000	182390000	142040000	167920000	153590000	155730000	103500000	108880000	171350000	173630000	134820000	101400000	147400000	168230000	168010000	163400000	156140000	140620000	144750000	111610000	162090000	123230000
0	2091400	0	0	0	582040	1419700	0	0	0	0	0	0	466400	0	0	0	771240	0	2342500	0	979120	0	0	0	0	0	0	0	697270	0	1456200	0	0	1856100	0	0	0	0	0	0	0	0	0	0	0	0	0	0	1153200
147710000	156180000	168620000	161900000	167960000	154890000	140790000	148020000	159170000	195260000	120310000	186540000	162820000	180180000	139680000	193760000	154270000	188550000	144260000	170060000	171020000	193790000	130900000	206580000	183410000	142690000	182220000	142750000	139050000	142700000	152110000	160770000	140930000	152890000	132110000	182170000	173230000	124390000	126100000	157820000	183870000	144650000	139270000	118130000	175110000	174650000	180300000	144530000	213530000	168060000
0	978550	0	0	0	0	0	0	0	0	0	0	1797900	0	0	0	0	0	0	0	1014600	0	0	0	0	0	0	0	0	0	0	2078800	0	0	0	0	0	0	0	0	0	0	0	0	0	0	0	0	0	0
15529000	24857000	23090000	18264000	21945000	23255000	20647000	45115000	25467000	25405000	28181000	22619000	21431000	20577000	21747000	22451000	19675000	26087000	27526000	20961000	20021000	25218000	28993000	24805000	26609000	19364000	28222000	27647000	21324000	15228000	20638000	22562000	21673000	17731000	26390000	20150000	17920000	19756000	19369000	11956000	21386000	23393000	21692000	29557000	18317000	29784000	18536000	24393000	20858000	20851000
0	0	0	0	0	0	0	0	0	0	0	0	0	0	0	0	0	0	1361300	0	0	0	0	0	0	0	0	0	0	0	0	2098100	0	0	0	0	0	0	0	0	0	0	6534400	0	0	0	0	0	0	0
16167000	7561700	10906000	13280000	7488000	9882400	9816500	7580200	11068000	9619900	12554000	12583000	26913000	12356000	13029000	10735000	17941000	9529600	6908200	9913500	9129400	10252000	9784400	9546600	15883000	12329000	7240200	11533000	14441000	8542600	7068300	9770400	16206000	11422000	10823000	2761500	19735000	22639000	11869000	10675000	12459000	9885400	10617000	9950000	11250000	12043000	11171000	6634200	55401000	45547000
3576800	3904700	2746900	9312900	6231300	3839400	4592100	3009000	4253000	8032200	6833600	4730100	3472200	7113200	4483000	0	3574900	5426900	6396400	3545400	4175600	0	4914900	5370800	5686300	5763000	5241800	2303600	5076400	3483300	5556900	0	0	4752100	7316500	5743400	5973400	6081900	3388900	3620100	6131100	8929500	0	2710900	5384100	0	4036100	3959200	3032900	3757800
52616000	61262000	54043000	51791000	51271000	43529000	41575000	24842000	64009000	62086000	53165000	51615000	55194000	44944000	44209000	33583000	54432000	50907000	27717000	21474000	61880000	55303000	54795000	49911000	55133000	47612000	49383000	32435000	46520000	50236000	41060000	44087000	52335000	55994000	36867000	44626000	72925000	45940000	6649600	44237000	63239000	60208000	39282000	39902000	49609000	50449000	50933000	33674000	55423000	69141000
1432499968	1827800064	1719900032	1785600000	1354599936	1373299968	1455800064	1536700032	1818800000	1922099968	2054599936	2089299968	1411600000	1688800000	1626400000	1949100032	1477900032	1760400000	2111600000	1870400000	1663500032	1783699968	1757600000	1639299968	1531699968	1781299968	1894899968	1744300032	1407299968	1844099968	1597100032	1640999936	1249400064	1414300032	1596600064	1804700032	1612899968	1469600000	1521500032	1836700032	1592700032	1704899968	1660600064	1935000064	1373699968	1769799936	1855500032	1799800064	1470499968	1367699968
69837000	85118000	84333000	76505000	91245000	101810000	113150000	71816000	87551000	87993000	91632000	89176000	104740000	105530000	87454000	91624000	88723000	126820000	97772000	88519000	83039000	128540000	101950000	83088000	89590000	85202000	100810000	105500000	74585000	95849000	111660000	96136000	87282000	91648000	86435000	114720000	82344000	70901000	70908000	89774000	87814000	82746000	76864000	92347000	80098000	71144000	75120000	72561000	65989000	80300000
0	2573900	0	0	0	0	0	0	0	0	1675800	0	0	0	792580	976660	0	0	0	0	491270	0	0	949080	0	933490	0	0	323800	0	0	0	687790	0	0	0	0	0	2551800	5008200	0	0	1321500	0	0	0	775290	1153900	792530	0
30813000	23213000	19191000	31519000	20260000	19410000	19836000	14988000	22614000	21070000	29676000	29077000	22895000	23021000	33635000	24123000	18627000	26410000	26470000	28801000	24283000	30512000	30984000	25834000	30759000	29109000	33387000	28452000	24558000	19091000	30762000	33220000	18643000	22091000	22503000	33373000	12073000	16905000	17063000	23480000	34055000	23866000	18872000	24895000	32569000	25562000	20834000	22882000	36240000	59899000
173610000	175780000	213540000	181720000	208820000	200950000	172110000	192130000	191550000	199940000	236710000	143240000	183850000	197890000	183180000	192020000	160380000	205140000	203070000	170450000	174140000	208780000	201530000	214730000	179440000	177140000	214110000	172740000	183040000	194020000	177740000	193070000	177150000	164440000	241980000	201060000	164500000	165080000	176000000	167740000	221510000	201080000	195330000	184740000	151540000	197550000	198180000	153620000	170940000	193630000
1377699968	1239500032	1318800000	1536700032	1232199936	1422400000	1518899968	1730899968	1175900032	1479000064	1741100032	1443800064	1047200000	1292499968	1408199936	1664199936	1143699968	1366099968	1498599936	1486200064	1210400000	1236000000	1353299968	1457500032	1165400064	1367600000	1565900032	1698499968	1483699968	1869400064	1615500032	1639699968	866860032	1397600000	1262000000	1492000000	1355399936	1485200000	1424999936	1820300032	1282200064	1325200000	1321600000	1695299968	1348700032	1537600000	1748999936	1857299968	952360000	941710016
140430000	118180000	44480000	70549000	62794000	76863000	53435000	73435000	84136000	40484000	90966000	90759000	71075000	69945000	82728000	82451000	73224000	95906000	87739000	80951000	66316000	69394000	64744000	105020000	116110000	80430000	76469000	79051000	94461000	98626000	82990000	76476000	70201000	79442000	74829000	61325000	95090000	50817000	78841000	64457000	104090000	72910000	70837000	69839000	144550000	65656000	67612000	92452000	73317000	66507000
129930000	173410000	160370000	143480000	92684000	120300000	122250000	100850000	144580000	152950000	43276000	102500000	145820000	99421000	139890000	131440000	119030000	116200000	123040000	154920000	155500000	132230000	132950000	134170000	128570000	98574000	137150000	119470000	135720000	93438000	111380000	135340000	147900000	131710000	143760000	158950000	160130000	110440000	119450000	94659000	160230000	146960000	171160000	128670000	119250000	219210000	155820000	108580000	118460000	130980000
111980000	113620000	139460000	113090000	125800000	130980000	116740000	115530000	93273000	137000000	114600000	122820000	129920000	109310000	162080000	102850000	126910000	132320000	159720000	148140000	110160000	111690000	116700000	109090000	108920000	115850000	102170000	125880000	126470000	168510000	138850000	137350000	113270000	141710000	149330000	145650000	124860000	113060000	127250000	118350000	136520000	100450000	141110000	126320000	101490000	133620000	126180000	109420000	131590000	150850000
13513000	14110000	8822900	9521800	9766000	6708800	5847600	12796000	12549000	6499400	6290900	7369300	10838000	8129800	5919700	10166000	9244100	12983000	0	10670000	11263000	10586000	9582300	0	12478000	12732000	0	11631000	14363000	9876300	24950000	11294000	15962000	20587000	12398000	0	13357000	8629600	11415000	0	18271000	11756000	11781000	8019400	27220000	8790400	8841500	0	19599000	14272000
1109699968	1370300032	918550016	1034000000	536240000	794440000	647200000	1234700032	528249984	1044300032	698360000	473070016	489609984	391760000	279369984	888670016	619600000	865859968	840750016	1004099968	733969984	837910016	747470016	879340032	616910016	507220000	506670016	745769984	783260032	837270016	790169984	634579968	1026300032	1018899968	611180032	1287200000	683529984	1216899968	930790016	1286000000	665660032	922560000	930760000	806889984	755529984	929550016	1470099968	855950016	681649984	651040000
116290000	105940000	78105000	88752000	125330000	112350000	95698000	95509000	50773000	56590000	47017000	51056000	83422000	45519000	60280000	67991000	113050000	71187000	60910000	82166000	118370000	65969000	105670000	55323000	91929000	45411000	52079000	88915000	87815000	65951000	60944000	86537000	64415000	63651000	54920000	99863000	85347000	71795000	79719000	59245000	48510000	47656000	46689000	47732000	86322000	50569000	73138000	97042000	60871000	56133000
17844000	29194000	13010000	21826000	15252000	16326000	26461000	24804000	22085000	18799000	31348000	17644000	16559000	36439000	23870000	26042000	20342000	48373000	19377000	17948000	23170000	51112000	20612000	24896000	19558000	28879000	10800000	23709000	22983000	7864400	20852000	18492000	27279000	16115000	20845000	24014000	12208000	14968000	14515000	15900000	19155000	24081000	13961000	29739000	7658500	28728000	15248000	12274000	23599000	25037000
71459000	72208000	48025000	60385000	85834000	53501000	71998000	48848000	87545000	54958000	46485000	43264000	86883000	65614000	65882000	53472000	90503000	67007000	25578000	63938000	89261000	53367000	57790000	52088000	71968000	46513000	66492000	52973000	98612000	63278000	48300000	50964000	70704000	61673000	64916000	58784000	73170000	73073000	47961000	73630000	65009000	77198000	49579000	35857000	62331000	78589000	57415000	44337000	67732000	0
27263000	31424000	27425000	39665000	24864000	32193000	27282000	29243000	35657000	37657000	37608000	28247000	28273000	26877000	24507000	22857000	33597000	32735000	38003000	34168000	30728000	29169000	24581000	31639000	33663000	24745000	29416000	27698000	37156000	36684000	33998000	29529000	28734000	28038000	26008000	39992000	33780000	31817000	28755000	23805000	31633000	56165000	30164000	31903000	33835000	40998000	32486000	38762000	33323000	26838000
41040000	42525000	48447000	44594000	42750000	45644000	56101000	56372000	61892000	51712000	68253000	53145000	41537000	49410000	52996000	44085000	46922000	40116000	45329000	37954000	38881000	45233000	45526000	54277000	35679000	38310000	40785000	42554000	47109000	45162000	46993000	48560000	47551000	46080000	51601000	46122000	40584000	49696000	61312000	43398000	34002000	39915000	56406000	47048000	50156000	45187000	52665000	51336000	35543000	42206000
599260032	546689984	522489984	735640000	777340032	475140000	570099968	661840000	782540032	832899968	532680000	1036099968	548529984	600520000	704049984	568400000	634310016	495680000	597580032	658809984	660550016	704380032	648300032	779920000	570969984	496760000	505800000	630609984	744249984	773449984	734040000	648849984	585150016	774979968	647369984	1041299968	602339968	751040000	700049984	990430016	652520000	704769984	525129984	869209984	695790016	648579968	841670016	833120000	507220000	636390016
5208900	7674400	5410500	0	7413200	0	6378900	0	7863700	0	0	8160800	12612000	0	0	0	9984400	0	5341100	0	8170000	0	0	0	5964700	0	7403800	3901400	8320000	5806600	6218500	5261600	5087800	14147000	0	17067000	14655000	6560900	13728000	9911500	10469000	9056200	8355500	0	5243200	6512700	0	5992500	11872000	7349300
3350700	3288500	0	0	0	0	0	5414900	0	7967200	0	0	0	5506700	0	4451300	0	4351300	6519500	0	0	4753800	0	4657000	3459300	0	5163200	0	3274000	5513900	4849400	2640400	3459600	0	0	0	2953300	3457000	3235900	4528200	6028700	4752400	0	2475300	5505500	3802600	3481300	0	5087700	0
309990016	0	411740000	284100000	357929984	466729984	352680000	347929984	523529984	422440000	565550016	442190016	337529984	431689984	547790016	357500000	343620000	493840000	510830016	490150016	504900000	391780000	312620000	379790016	223400000	300249984	351640000	595470016	484070016	583529984	502070016	480089984	323880000	345960000	463840000	511009984	417000000	567760000	379710016	661619968	306209984	507100000	417630016	483689984	478000000	553600000	445760000	421710016	137630000	215040000
0	4519900	2483200	0	0	0	1733500	2565500	0	0	2284900	0	5717900	2117400	3035600	3968900	0	1463500	2359000	2852800	0	0	0	0	1727200	0	2134500	2360200	0	0	2222200	3081400	2235100	0	0	0	3590500	0	0	5715100	4438800	1829300	0	4651300	2769600	3199000	2770600	0	405690	0
10284000	5754000	10878000	7718900	8877500	9504100	5850200	13056000	10785000	14907000	0	4923200	7764100	14039000	9554500	5925800	10945000	19175000	0	9302600	10112000	8352400	14666000	6591800	4942800	7052100	9930600	6311700	7951600	8136000	6471400	7437800	5773800	7289700	7178600	4355700	8418200	9520800	7814400	0	5860900	22548000	6455100	8248600	10853000	7058800	6499900	11332000	14522000	0
10035000	8845600	7665800	11423000	20194000	9243600	6424600	6300200	0	5931400	5041400	2790500	12072000	11119000	9065900	12990000	12662000	9855100	3962900	8039400	11892000	10150000	9261900	9069400	13530000	6755700	9285300	6699800	11000000	9158100	13199000	11948000	10088000	9558500	6303400	6926100	14451000	9143500	10524000	6168400	12525000	7915700	8535300	5146000	8374400	9050400	5895400	8026700	8375700	10815000
6947200	6827500	0	0	9875200	8508200	10269000	7786400	0	0	0	8583300	8905000	0	0	12636000	7039800	11538000	0	7451100	0	0	0	0	7268900	0	9012300	0	7598500	0	6995100	9200400	8598700	0	13757000	9226900	9985700	9530100	8063800	10479000	7196800	7144300	8644000	17249000	5813100	0	0	17111000	14648000	12644000
3368800	0	4046300	0	4717400	6226900	0	0	6366000	0	0	2910900	8110000	6287600	0	1868400	0	3538400	0	0	7696700	7019700	5124700	0	5367900	0	0	0	2489300	2523600	1284500	2402900	2110900	0	5015900	0	2768600	2205800	2452500	3396900	2000400	0	0	0	2933100	3330900	4456300	0	5362000	0
117810000	158490000	152250000	157820000	153490000	125590000	138780000	160500000	147030000	131680000	220230000	194990000	153070000	110280000	223410000	179850000	116620000	136610000	177630000	150470000	159090000	127560000	171270000	138150000	130660000	113680000	150760000	164260000	159810000	219160000	146630000	194770000	116380000	129090000	170650000	154590000	89474000	112810000	95366000	168870000	83074000	105180000	119930000	210130000	135280000	119330000	172570000	164060000	119870000	78228000
53523000	33757000	41735000	25889000	37485000	28473000	25856000	37104000	24151000	24077000	43868000	30363000	27994000	24926000	24461000	31714000	35326000	24573000	22919000	24514000	34380000	25008000	34236000	38852000	33827000	15028000	35758000	28472000	30827000	16565000	29682000	30682000	22801000	34374000	20429000	20132000	42540000	0	34658000	40823000	17322000	22015000	19530000	17612000	37978000	23574000	34542000	13233000	10268000	16559000
2791500032	3358400000	3580100096	3581900032	3190599936	3733700096	3966700032	4030799872	3489799936	3369100032	3518000128	3612100096	3173199872	3968699904	3898200064	3906700032	3233100032	3628400128	3948100096	3455000064	3208100096	3471600128	3708100096	3740999936	3496300032	3340400128	3615699968	3609499904	3439500032	3754800128	3722599936	3669900032	2712199936	2984100096	3425299968	3843599872	2974599936	3590500096	3226899968	3856600064	2469799936	3185200128	3243099904	3934700032	3061400064	3606799872	3472999936	4183200000	2209600000	2645900032
485129984	482540000	554899968	473430016	427200000	516580000	524910016	457560000	476969984	467780000	485310016	480209984	537340032	478300000	526680000	557600000	527969984	555619968	567590016	542440000	456889984	500240000	442340000	470670016	448840000	471980000	517000000	475560000	389260000	535550016	500940000	519369984	494769984	468080000	571400000	517620000	503200000	478809984	557089984	446460000	526220000	597670016	546409984	587369984	459700000	411080000	557920000	526870016	611689984	548329984
34393000	34346000	46051000	27983000	26698000	28315000	24882000	31658000	22823000	23251000	18571000	22904000	19482000	22532000	21069000	26221000	44662000	33064000	41710000	26980000	37931000	29153000	17025000	26410000	35813000	23924000	35191000	32090000	23288000	11662000	21024000	18986000	32321000	47866000	26375000	22600000	21142000	31852000	44279000	30269000	29798000	33549000	42184000	33772000	41972000	25919000	31671000	25196000	49974000	67504000
32976000	40871000	34991000	41229000	25238000	45759000	37612000	32466000	54754000	36975000	32679000	54145000	60683000	47789000	31234000	25615000	48091000	42379000	49361000	42499000	42057000	49371000	40614000	35610000	62181000	31986000	32116000	28679000	38165000	32260000	28653000	25202000	49976000	53396000	31046000	54253000	40625000	40882000	21853000	33453000	39912000	64751000	40119000	30032000	46242000	46918000	46755000	28534000	40566000	81865000
83319000	80235000	76880000	78104000	67985000	98281000	86380000	79365000	45093000	68069000	78430000	66793000	57136000	69619000	66619000	75238000	63291000	71521000	80864000	81271000	62064000	72255000	52237000	64173000	63372000	82787000	59058000	61929000	64045000	77542000	63030000	59967000	84740000	100340000	102170000	86960000	87967000	74688000	78321000	54045000	64135000	127110000	76601000	52313000	69286000	106100000	76061000	82085000	76410000	94874000
10316000	14587000	6424100	11558000	10656000	8486200	7514300	6427300	18066000	9990600	24269000	10496000	5328900	8382300	8676000	9723200	6231800	15092000	9112100	8822300	14086000	0	11587000	13351000	10320000	11164000	9065600	9192900	9800000	13756000	7034800	7546500	0	11497000	7816500	8668500	0	11878000	15704000	8924300	7860200	9818500	8892700	12189000	0	7042000	19948000	6278500	38906000	22827000
12164000	11275000	14108000	15716000	6865700	7619500	0	10265000	10226000	1340200	4929000	12954000	0	3358700	0	2863800	21551000	18282000	14529000	17233000	5405800	0	0	0	6010200	9373000	1625800	14082000	2840300	0	0	409000	12975000	11938000	0	1876900	3722000	7152900	2654200	754430	16950000	16287000	17486000	9363500	4111900	0	0	3224800	61029000	59636000
50239000	42060000	47577000	46986000	41803000	34903000	39651000	35633000	50198000	47858000	59367000	55121000	45327000	48355000	46086000	41831000	52529000	64296000	62156000	52383000	47711000	50332000	39949000	49849000	42119000	39282000	44178000	48022000	47168000	46034000	38831000	40516000	63420000	53139000	58976000	53313000	39950000	52250000	45768000	34159000	47679000	72816000	65752000	46845000	50268000	47844000	49385000	33129000	74723000	66658000
189820000	352550016	188620000	216560000	244070000	200660000	196280000	174820000	193030000	245350000	248520000	175500000	150060000	184880000	175240000	225890000	196650000	215560000	192570000	230860000	182270000	166260000	180590000	211640000	226800000	205240000	224320000	237510000	235760000	197500000	168720000	189510000	273780000	72329000	127800000	130370000	254980000	207800000	173650000	165610000	300030016	235360000	167950000	237130000	224730000	245760000	194250000	188390000	177180000	113930000
0	1465600	1029500	4455800	1575500	4443800	1534200	1309500	0	5905000	0	0	1973300	1156700	1409400	1551700	1273300	2533000	0	1963600	1539000	1250300	1840600	1490200	1708400	0	1280600	2865000	1975900	0	1524500	1506600	0	0	891480	2125300	3225900	0	1305000	0	2050900	3150200	0	2200000	0	2677200	0	0	0	1333700
306009984	376390016	343980000	325440000	237450000	293550016	325110016	310049984	319590016	312070016	359180000	288620000	241010000	272620000	304800000	292560000	247330000	306569984	303209984	319369984	278049984	296169984	345990016	362820000	291700000	319270016	402550016	395129984	383030016	322609984	336449984	323380000	291760000	313390016	350350016	345220000	321220000	269100000	319060000	305830016	294920000	374540000	346300000	348190016	334080000	297820000	387260000	481060000	345960000	363350016
343880000	440640000	505409984	678110016	326280000	512369984	461420000	551270016	271470016	262020000	338480000	433390016	288440000	410260000	447200000	499700000	294500000	323760000	601260032	437440000	240630000	307940000	332780000	402440000	281230016	326480000	319550016	368660000	249990000	331129984	310790016	458420000	428889984	665150016	748940032	912169984	405800000	692449984	542790016	806289984	366569984	444929984	646769984	868350016	283649984	369569984	489910016	701160000	558780032	617649984
16303000	15867000	24356000	19976000	10821000	6584100	7920000	8873800	13443000	6433900	13350000	15278000	5374500	4539100	4010800	4351900	23593000	27509000	32025000	19827000	0	1886900	621640	0	8226800	7539800	5815400	8126100	0	2876200	7510700	10994000	40139000	42383000	28494000	55374000	8250200	8359200	8703700	11051000	31784000	36110000	32300000	41537000	7215600	10694000	8168200	4837300	79715000	71600000
0	3539400	4154600	5334800	0	4250100	4538800	5915200	0	0	10041000	0	2126400	2176000	0	4275000	2444400	0	6255700	4045300	0	0	8181900	3143600	0	4617600	0	4465400	0	0	4328600	3709400	5123100	0	0	0	2614200	0	3688200	2982800	3354000	4155600	0	0	0	5065200	0	3924700	3451300	0
35063000	28714000	86672000	0	48746000	52148000	42571000	35144000	59044000	61350000	51231000	0	85106000	37578000	93094000	40843000	45538000	0	0	119470000	36915000	47353000	49760000	98237000	53880000	58080000	31518000	44256000	35622000	40615000	52514000	40398000	0	28900000	27448000	0	44164000	50570000	24923000	0	54019000	19844000	0	0	3342400	35565000	0	0	0	51989000
0	2552300	0	2145600	0	2716400	3173300	0	4340500	0	0	0	1117500	2711300	4264500	0	1274800	3372200	0	2446600	2040900	3053200	0	2779900	2224400	3933500	3251800	3111500	1606900	2247400	3059900	2670900	0	1703600	2614100	3848700	746760	2757900	6309000	6319400	0	2638300	0	5927900	1674300	3718900	2391400	0	3910900	0
46051000	26084000	65215000	45623000	44763000	62583000	31964000	24780000	37701000	8583900	47513000	38756000	28398000	36498000	29481000	31305000	26558000	79736000	16745000	26010000	39368000	32663000	21579000	31913000	34508000	44330000	47753000	46099000	55519000	33327000	30402000	38734000	35770000	45788000	19279000	26720000	28693000	70938000	28606000	43760000	65724000	32070000	18834000	35145000	64215000	29807000	89445000	43073000	57604000	67065000
4858999808	5567499776	6095699968	6346500096	4878600192	5659400192	5758900224	6738599936	5688699904	6206700032	6236299776	6276100096	4421000192	5633999872	5590600192	6149100032	5117100032	4963999744	6190700032	6262700032	5330100224	5775499776	5632000000	6981899776	5599600128	6181899776	6167900160	6820499968	6254199808	6346399744	6515100160	7052199936	4984900096	6287900160	5991799808	6612899840	6025099776	5829199872	6239499776	6272099840	6281600000	6208200192	6325100032	6944699904	6025500160	6521900032	6175799808	8438199808	6128099840	5603800064
47909000	50906000	26112000	31314000	0	0	0	0	57025000	51272000	54788000	56639000	0	0	0	0	148250000	129340000	74886000	68360000	0	0	0	0	50440000	37987000	32590000	37780000	0	0	7960300	0	0	0	0	0	0	0	0	0	45176000	47224000	33961000	25594000	0	0	0	0	0	0
35408000	38705000	37435000	44213000	44926000	47305000	37242000	38009000	41393000	60319000	41002000	40077000	42618000	41605000	34369000	41374000	51284000	39844000	59702000	46286000	36969000	49136000	32884000	41450000	44379000	38846000	34796000	38560000	37352000	35103000	43520000	37157000	40820000	27106000	32416000	29997000	30739000	28218000	36372000	24552000	33869000	34427000	36655000	40117000	47461000	50981000	37453000	32696000	6953900	27491000
0	7547700	8809600	7846900	7886800	5914200	6983000	9454000	5767000	8487300	5541400	0	6644900	4911900	4802200	8313200	8434300	5511100	6819600	0	7271800	8519900	6489000	11045000	6631200	6621100	9940400	6176800	9440400	8081600	5848300	7263200	8303800	10218000	6970500	0	0	8048900	7323300	8713000	5023600	9277500	6841400	6666500	0	12897000	7818000	4911300	11908000	0
364350016	412280000	349729984	323600000	379980000	369400000	324340000	365590016	339649984	319489984	414040000	348950016	310820000	390590016	422920000	336180000	357070016	380329984	421550016	361790016	367769984	332350016	325609984	394969984	319700000	415120000	341929984	403460000	377830016	345520000	379820000	427609984	285260000	305020000	344630016	311830016	259250000	317089984	378489984	403209984	272769984	320489984	385340000	444190016	308040000	355110016	382870016	461440000	308670016	415360000
0	0	0	0	0	902590	0	0	3440900	0	0	0	0	0	2452900	0	0	0	2774800	0	0	0	1872600	0	0	0	1380800	0	3557200	0	3395900	0	0	0	0	0	0	0	0	0	0	0	0	0	2238400	0	0	0	0	0
40923000	39531000	43708000	40185000	41653000	40426000	38413000	39256000	51182000	38954000	46504000	55117000	37904000	35548000	44334000	37722000	45044000	48793000	39227000	42885000	42591000	36170000	42241000	45164000	50087000	41301000	45662000	44849000	42635000	39201000	36366000	43075000	44054000	44407000	43361000	45845000	52968000	38484000	38795000	51837000	43692000	47677000	43396000	52488000	47207000	39738000	42480000	49525000	42058000	56582000
0	0	0	1460100	0	0	1162200	0	1184200	1808500	3798500	0	0	838300	0	0	1802600	1561500	0	0	1309200	1397600	0	0	1243600	0	991300	1487000	0	0	0	1394600	0	0	0	0	0	0	0	3709500	0	0	0	0	0	0	0	0	0	0
83340000	96742000	85704000	79044000	80688000	79636000	72290000	82716000	71168000	58072000	67739000	48812000	70992000	87735000	63648000	66665000	71780000	92893000	75349000	91086000	64237000	67332000	51701000	66704000	61589000	67051000	55829000	65407000	50814000	85353000	60583000	54181000	133110000	113910000	108580000	95466000	106340000	100960000	116530000	68485000	108850000	83693000	134540000	94933000	104900000	99865000	125030000	79262000	98098000	90365000
0	6805500	8770700	0	6705300	10722000	8304700	10446000	10961000	5507400	16667000	0	0	14124000	7015700	12192000	6737400	8695000	4255700	6536700	8977800	11370000	0	7559800	5814800	12122000	0	2048300	6784500	15929000	5910900	9238300	8171400	8127100	12060000	0	8014900	9069000	0	0	9353400	12309000	0	0	0	14951000	5446200	0	21271000	8245700
15593000	2293400	4374500	0	0	4756700	3648800	0	0	11241000	0	0	5140400	0	6385400	0	2372600	2482700	0	0	0	0	4033500	0	13745000	0	0	368150	2971600	0	5130700	2861500	6071400	3083600	4965400	6056100	5758800	0	10522000	0	4550000	2572900	3900900	0	4253800	4758700	3178900	0	6753700	3623400
3005300	0	2976700	0	2820100	1037000	0	5568200	4508500	0	2640900	3844900	3650200	4224800	0	0	0	0	0	0	2763100	6379800	0	0	3655100	0	0	544350	0	0	3569300	0	4247200	3772300	2939900	0	3414000	0	0	0	3515300	0	0	0	4996700	0	0	0	5221400	3493900
49368000	41582000	39108000	46307000	30469000	38629000	32432000	33227000	41450000	44083000	60257000	48258000	40092000	38312000	38512000	40080000	37871000	39450000	34846000	38697000	31930000	21187000	36524000	45126000	42051000	32673000	43785000	39156000	25041000	65678000	50367000	40000000	53746000	31826000	50785000	51303000	34051000	33347000	36099000	35765000	40172000	45264000	37271000	45432000	40461000	42592000	39521000	37947000	39300000	54360000
0	0	3718000	0	0	0	0	3152500	0	0	4156000	3952700	14768000	6850800	3969900	4443400	13178000	0	4335900	4131400	0	371080	3498500	3581300	0	0	4792200	6124000	0	0	3149900	1355100	0	0	4390300	3373900	0	0	0	3779600	0	0	3410400	0	0	0	3612400	3558800	7138600	0
17981000	13351000	9203700	14609000	2991300	0	0	0	6515800	8898700	4169300	1449100	2733800	0	0	9785200	5648000	1902400	0	4243600	7588300	6817800	0	3389200	8333000	9944700	16193000	8731400	4077500	2168900	2801800	3551200	5946900	4705800	2463400	0	36630000	18089000	5399900	13897000	3828700	2219000	4516300	3743400	7201200	6979100	3862700	6432100	0	0
0	0	0	0	0	0	0	0	0	0	0	0	0	0	0	0	0	0	0	0	0	0	0	0	0	0	0	0	0	0	0	0	0	0	0	0	0	0	0	0	0	0	0	0	0	0	0	0	0	0
67926000	64498000	56724000	62084000	58563000	86978000	58433000	65426000	50723000	49524000	50084000	59478000	62664000	64975000	63436000	55280000	58119000	89334000	72033000	74153000	64607000	101490000	68210000	93078000	53015000	71817000	61492000	68709000	60977000	45575000	47584000	53296000	62499000	59377000	66092000	70795000	62658000	57809000	52708000	64776000	66574000	67304000	54451000	63473000	66486000	44692000	59077000	62356000	61494000	74052000
41810000	50198000	45541000	45988000	46372000	65506000	50685000	39091000	43220000	52991000	51573000	61719000	44919000	66293000	54275000	43960000	46562000	49948000	47344000	51053000	49075000	55526000	47807000	42934000	65754000	49331000	49073000	47406000	60285000	52509000	45909000	38162000	55960000	45214000	45166000	41422000	48852000	44555000	42558000	40217000	62291000	60751000	52606000	50855000	45781000	79302000	55479000	49698000	146470000	181170000
7226600	4759000	5758400	5819800	10107000	4334000	12543000	8160100	4296900	5013400	0	0	8425100	6065800	14120000	6393800	0	9174500	7850900	6087700	9079600	5097500	8324300	8327500	7520200	11235000	8923700	0	11733000	3855000	12365000	7392700	0	9262000	5847300	4941300	11513000	7972900	8816700	4732000	7194900	0	6545500	0	7275000	6030800	11163000	5768600	0	8639100
1257600000	1304499968	1444499968	1581900032	1379200000	1334700032	1438499968	1728400000	1264300032	1503900032	1487800064	1474800000	1216400000	1360800000	1441500032	1831900032	1422000000	1463399936	1711000064	1592199936	1240800000	1065200000	1570700032	1544400000	1454499968	1632000000	1772400000	1967200000	1648099968	1659399936	1754400000	1756800000	1073400000	1358099968	1431800064	1617900032	1228600064	1582000000	1552000000	1488300032	1252999936	1268199936	1506400000	1550099968	1249600000	1619699968	1487500032	1655500032	779329984	882360000
0	0	1521600	1684500	0	1535300	1778400	0	0	0	0	0	0	909630	0	0	0	942010	0	0	0	0	0	0	0	1169000	1144400	0	0	574050	1098900	0	1038600	0	0	2528400	1203200	0	0	0	0	0	0	0	0	839290	0	0	0	0
21031000	17373000	18821000	26086000	18553000	31400000	21060000	23840000	14319000	20352000	33700000	20725000	17817000	19784000	18808000	22558000	14710000	17188000	19459000	18453000	15436000	10330000	23727000	25064000	23528000	16876000	19066000	19270000	19235000	20017000	29108000	22394000	15287000	24125000	13852000	14747000	18733000	13698000	17619000	20643000	17068000	13946000	14278000	19571000	21224000	14819000	11715000	15769000	16136000	0
4813300	4576300	3553300	6024000	6844900	4781800	8808200	8916700	6009100	2879000	4414600	5628500	7002700	4795500	7238700	9346200	0	4102300	5852900	10535000	3638400	4292800	6552700	3201700	4042400	5875900	8570800	0	4442500	6206100	11860000	7686800	2470200	4077800	3657800	7067600	4476200	4826900	5447800	7312500	2092300	9877700	3745600	0	6221200	6542400	5427500	3326700	0	0
0	2309900	3689300	1918100	0	2655400	3318100	4892000	0	2012900	2736200	2879000	0	2575800	0	2069500	0	2792000	2515800	2807100	2273800	0	2561000	2721900	2490900	0	2231800	2913200	1841800	0	1945200	4255000	2602100	2127600	3556800	2636600	0	2764900	2920200	3804000	2964000	2868600	2946900	8078500	0	1546500	0	2775500	3379800	2198500
96974000	112400000	96847000	87659000	79384000	92667000	83458000	81684000	87108000	89652000	67577000	79762000	101710000	85896000	84506000	120560000	91783000	107740000	87431000	133790000	108130000	98202000	77998000	94133000	105890000	99840000	122330000	102040000	118850000	106630000	89724000	100530000	107440000	77837000	69942000	57546000	87902000	87992000	78694000	67619000	104000000	145030000	100630000	72545000	115950000	93105000	93864000	99043000	110640000	132880000
226440000	218040000	241790000	238990000	198380000	249680000	247830000	236870000	212470000	211420000	215230000	309280000	185980000	222800000	277849984	235440000	188550000	211310000	245360000	252020000	265620000	190310000	289249984	261500000	287560000	202620000	274969984	235150000	245320000	291900000	321660000	373910016	273800000	233690000	300040000	332960000	192150000	262040000	251680000	290700000	215530000	187150000	252380000	304020000	172970000	235760000	310180000	346580000	226970000	179240000
112170000	61283000	105450000	63148000	71354000	52055000	85963000	63229000	39668000	59368000	59933000	87935000	69507000	64731000	55307000	68425000	49818000	30192000	59524000	58048000	76964000	97113000	64754000	59803000	48789000	85534000	65206000	50730000	23580000	77557000	49784000	58930000	53180000	53456000	44375000	45999000	93705000	84895000	83506000	36873000	84845000	72691000	62565000	38698000	84413000	102560000	97938000	71346000	76997000	55517000
0	0	0	4537700	0	0	5003300	4953000	0	0	0	5045300	0	0	0	4789400	4036000	0	0	5294600	2994400	0	0	4177400	3025800	3844600	0	4908300	3360600	5800400	7523000	9502900	3313300	4296400	4075900	8513500	10326000	6976500	13443000	52403000	0	3961400	0	0	21915000	16649000	16236000	14723000	0	0
85076000	96890000	96076000	121620000	104860000	104870000	101440000	93143000	113610000	131710000	108370000	124710000	95350000	78444000	95146000	97907000	95547000	99885000	83642000	97794000	134130000	105070000	110430000	103570000	92194000	96655000	110520000	124060000	94193000	98490000	101450000	87472000	89774000	113920000	83454000	99662000	86296000	108040000	87411000	94679000	92480000	95532000	86302000	114780000	91054000	97430000	84082000	92098000	55224000	65103000
0	0	0	0	0	18436000	12699000	0	32980000	0	0	0	0	0	0	0	0	0	0	0	0	0	0	0	0	0	0	0	0	0	0	0	0	0	0	0	0	0	0	0	0	19220000	0	0	0	0	0	0	0	0
4289400	0	0	0	157860000	0	0	0	0	0	0	0	153760000	0	0	0	0	0	0	0	112470000	0	0	0	0	430510016	0	0	0	0	0	0	0	0	0	9485400	0	0	0	0	0	0	0	0	0	0	0	0	0	0
4528400	2297900	2892200	0	3359400	1993100	0	0	4471000	0	3371300	1784400	0	2001300	0	3227300	4407800	2087600	0	1365100	4424300	0	0	0	3363500	0	0	2573300	0	0	0	1672500	0	0	0	0	5569400	0	0	0	1408200	2085300	0	2441800	0	1883800	0	0	2034300	0
212360000	227200000	192320000	189950000	232480000	238210000	212180000	234290000	189950000	232470000	190230000	190760000	228800000	272520000	235950000	237900000	229940000	233180000	237640000	230930000	220660000	226510000	210410000	238550000	219420000	258510000	210700000	224230000	220270000	211120000	229310000	216250000	194690000	191040000	209020000	152060000	162960000	214810000	200570000	204330000	180150000	192390000	177240000	175190000	217400000	232230000	205810000	214420000	112240000	116210000
7491800	11562000	0	4381200	4477100	0	5829900	9917900	4914300	5060000	5352500	0	4977900	3425500	4849800	4623800	3941100	5616900	0	5632600	4957600	5871100	8450700	4382400	3829200	11471000	5382000	5348900	5010300	6869000	9044800	6899700	5360100	4963300	7006900	7161800	6188700	5589300	9752200	5518100	13321000	0	5907300	2819300	4815900	5865400	6721700	4321900	6110800	0
0	701940	1267000	0	0	775210	1214300	0	7617300	7880400	0	0	5854800	699870	1334700	0	4947500	750160	0	0	0	671400	1214200	117730	744330	1056600	0	1537200	643460	0	1161600	7479400	0	534970	0	1544000	5069100	878630	69081	1506700	6149700	866530	1483300	0	5994100	731780	1253200	1383000	0	894130
0	0	0	0	0	0	0	0	0	0	0	0	0	1523100	0	0	0	0	0	3613500	0	0	0	0	0	0	0	3154800	0	0	0	0	0	0	0	0	0	0	2713900	0	0	0	0	3844400	0	0	0	0	0	0
43117000	43808000	38887000	38508000	35620000	31016000	37376000	38087000	32973000	45176000	33719000	36036000	41198000	41287000	35091000	41575000	47604000	30804000	42297000	48829000	36322000	44903000	34059000	34272000	38917000	42852000	35097000	52858000	48166000	50856000	53198000	40103000	62878000	40740000	50229000	49655000	48590000	39219000	35211000	32567000	41100000	43982000	45673000	31455000	41062000	52810000	40773000	33391000	54182000	38825000
291190016	416740000	253930000	300289984	354360000	290870016	279969984	261170000	291470016	258340000	249610000	246470000	214680000	302390016	322040000	212590000	250420000	233110000	235350000	299540000	320289984	243720000	201130000	224020000	347750016	233630000	300980000	262100000	266450000	297320000	268769984	299920000	284520000	369310016	289620000	280680000	298910016	260550000	300760000	233970000	287860000	294950016	238560000	209300000	252720000	291880000	282000000	361320000	363710016	217230000
0	2315600	0	2792400	0	1160400	0	2887700	0	4474100	5313700	6282200	0	4137600	4199900	2586000	0	4350600	6923100	5020200	0	4544900	5735300	5449400	0	1552700	1731200	3702100	0	1545300	2853500	10129000	1673200	3361100	6007800	7243600	0	0	2806300	4547300	3344800	4212200	7906200	3945400	0	2381800	3586000	4295500	0	0
152250000	112290000	146830000	132930000	111240000	145760000	137600000	132480000	130440000	114960000	148870000	154830000	81257000	105620000	163360000	111660000	139030000	127430000	143720000	126250000	150410000	124570000	135130000	141980000	120700000	127760000	159680000	119710000	136920000	133750000	146260000	158420000	97963000	148430000	164160000	149890000	109900000	115900000	118710000	133140000	120870000	149920000	161730000	96991000	129130000	134210000	149330000	110300000	122170000	111450000
337920000	346230016	349740000	346060000	328950016	324470016	351910016	402769984	355689984	391609984	286860000	318190016	464660000	367009984	359870016	353790016	325809984	351020000	306289984	360009984	381460000	354840000	373120000	312200000	392369984	385929984	410700000	349470016	374550016	400100000	336280000	329600000	331990016	399120000	363870016	330489984	344550016	350569984	319289984	330940000	330569984	394270016	372600000	278950016	403129984	349700000	348369984	402150016	376390016	456880000
0	0	0	0	3135400	0	0	0	2351900	0	0	0	2326000	0	0	0	0	0	0	0	3966100	0	2263000	0	2447900	0	0	0	0	0	2749200	1770900	0	0	2961600	0	1569900	0	0	0	1597400	0	0	0	2217500	0	0	0	0	5808200
13636000	0	10685000	5320800	4408800	6732100	5157000	5556000	10040000	7933900	6238500	9174300	4487200	0	6763000	9793100	6611300	9217700	6513500	4328400	0	0	7656200	5861600	0	10644000	10188000	5599600	7739800	16373000	5445400	0	0	17826000	4449600	0	17272000	14565000	13265000	22032000	4030100	0	5637700	5777100	7688100	0	7517700	3751400	4601600	0
0	23237000	28654000	30788000	35743000	22244000	26939000	26628000	35822000	28138000	39919000	46531000	27802000	20858000	30555000	30646000	43293000	27530000	36863000	36370000	28025000	25398000	24469000	37608000	28505000	21890000	30180000	37386000	31573000	23313000	40481000	35969000	34441000	53107000	31569000	38650000	20805000	38226000	18840000	19667000	36680000	42515000	37245000	26195000	37539000	35916000	26307000	32697000	29978000	30442000
41096000	50395000	52887000	42801000	47693000	61199000	38782000	52677000	52841000	57226000	51657000	54434000	40995000	40882000	56593000	42304000	58929000	47469000	50294000	41242000	33376000	33187000	34534000	39306000	42219000	43156000	39253000	47721000	48657000	47044000	47094000	48876000	50150000	50191000	29331000	56700000	54610000	44993000	60422000	38874000	55003000	50249000	41211000	42871000	46952000	55875000	66895000	50922000	59993000	39101000
187070000	169300000	183030000	173120000	165070000	165640000	145910000	150570000	148910000	162710000	170320000	163530000	154800000	192810000	170220000	152320000	187960000	181810000	134110000	148670000	171730000	159740000	162440000	144060000	153710000	176460000	150970000	148170000	170810000	157820000	145780000	142540000	148570000	200550000	169690000	146770000	138800000	170400000	152800000	151250000	150080000	208770000	161730000	156720000	156680000	134030000	152460000	108000000	266570000	254280000
3161400	4884900	4899700	3914200	5094000	4280200	5590900	3309000	14086000	2569100	6288500	7340000	7064300	3394300	4254800	6337800	5123000	2888600	5950000	0	3975600	4992600	5515300	6378500	2764500	3452200	0	3693200	5483300	5140700	2817500	5550800	3677700	5166200	5688000	3434200	4797000	0	3747500	0	3696700	3399900	3737900	3729800	7078600	3883000	3537900	0	0	0
0	0	0	0	2082300	0	0	0	1606900	0	0	0	2367100	0	0	0	0	0	0	0	0	0	0	0	0	0	0	0	0	0	0	0	0	0	0	0	0	0	0	0	0	0	0	0	1723800	0	0	0	0	0
0	0	2808900	2988800	0	5237600	5913600	4786100	4176900	4744700	7327900	2981900	2688300	4306900	3493000	3606300	3966700	2840000	2457900	3081700	5603800	5528400	6252300	4726600	5165900	3906100	5376900	4911200	6039900	6331100	4199500	5014400	3366400	6927400	4111700	1928800	0	6162100	6150800	2694900	4329700	6873800	6327100	3482700	3122500	4934600	3662200	2824900	3879000	6044100
29997000	34888000	30359000	46642000	23462000	33797000	31850000	72876000	55299000	32244000	31899000	47928000	27171000	32809000	27520000	39332000	28631000	38754000	27890000	39286000	18868000	44951000	36014000	56498000	32659000	25274000	42861000	39841000	42335000	32503000	26081000	40164000	42219000	44599000	34122000	26382000	25255000	20318000	19888000	12237000	36814000	31446000	33749000	15573000	34085000	19292000	41151000	28941000	30114000	49598000
363270016	471209984	414700000	433830016	618150016	748620032	835420032	772710016	227870000	251620000	206700000	226170000	336480000	385870016	311900000	321030016	295990016	253340000	283580000	220740000	254130000	197620000	207230000	154760000	237130000	287640000	265550000	242480000	381520000	389400000	369740000	442580000	708220032	653500032	633310016	641750016	457689984	451990016	411640000	374640000	258020000	308030016	290049984	272110016	201550000	206490000	173540000	251010000	849270016	678499968
16438000	30932000	20395000	25532000	21423000	30934000	17073000	14617000	17032000	14743000	16645000	17895000	12122000	13513000	23498000	13958000	17503000	22498000	18329000	15982000	17853000	15998000	14923000	10834000	14697000	19501000	27338000	18374000	17959000	17481000	15654000	12921000	22906000	19743000	26497000	19148000	9104800	18527000	9469800	15335000	25734000	34290000	24649000	24252000	17155000	14931000	0	22923000	61067000	37244000
3604800000	4144800000	3537700096	4202400000	4007500032	3648000000	4212000000	4010700032	3935200000	3920399872	3999000064	4292699904	3914400000	4674899968	4288699904	3819899904	4132100096	4775499776	4512999936	3983899904	4335799808	4536200192	3835899904	3876000000	4565799936	3768999936	4384099840	3603300096	4563500032	4685100032	4751900160	4843500032	4011500032	4275599872	4487900160	5173400064	5404499968	5131200000	5409699840	4716100096	4094000128	4908599808	4807600128	5065800192	4454099968	4661499904	4784600064	5986800128	4222599936	4833299968
10871000	13745000	12887000	332600000	18496000	13128000	11857000	20752000	15797000	0	12342000	17689000	16729000	25520000	12926000	14786000	14555000	10052000	11297000	13068000	15783000	479369984	18844000	17874000	13659000	71331000	19915000	205160000	26313000	19264000	14958000	24492000	13095000	44438000	20462000	14495000	24969000	18711000	9832700	14065000	10752000	7407100	11241000	11293000	20218000	7874900	14780000	20299000	24345000	19743000
99158000	81667000	67895000	71503000	69922000	95728000	51863000	73031000	79930000	97191000	80925000	82103000	77740000	104300000	84399000	75714000	101070000	132480000	71739000	77720000	84511000	92051000	72807000	79283000	65125000	83234000	71370000	80609000	79731000	97780000	77004000	84882000	101580000	99787000	75226000	57938000	92868000	102380000	71248000	69498000	72965000	113000000	112190000	89912000	93100000	71010000	77797000	63695000	102220000	83616000
60447000	91475000	72931000	60240000	55969000	63780000	66331000	55306000	50723000	52517000	62774000	56989000	75499000	79499000	64478000	55009000	77712000	78483000	43766000	58295000	70211000	72076000	63708000	53887000	65843000	73316000	71352000	70924000	59311000	66807000	48545000	68102000	84807000	67443000	56400000	41781000	81577000	66219000	79534000	32900000	73279000	61632000	48226000	20120000	69958000	70062000	71007000	47723000	65032000	57293000
0	100900000	0	81381000	62018000	0	90236000	64358000	0	86641000	96949000	73431000	0	87286000	60453000	65670000	0	0	69223000	73783000	0	0	60762000	102420000	93212000	0	75910000	83753000	0	0	60694000	60330000	107380000	0	0	91544000	86663000	0	53509000	69748000	209870000	6318600	118940000	126230000	74709000	0	0	47786000	320649984	0
0	28682000	32217000	26499000	21560000	32119000	23605000	37461000	25338000	30578000	27896000	28542000	0	57540000	28798000	24925000	0	36778000	37494000	31921000	28309000	20170000	26967000	27604000	49164000	0	38118000	31011000	19960000	27125000	34806000	27729000	3612800	43598000	37398000	34338000	0	22596000	27522000	23802000	61203000	51363000	86066000	47307000	0	18945000	25047000	45042000	176380000	196220000
0	1757800	1618000	0	1798100	1347400	0	0	1500400	0	0	0	1655300	2134700	1526300	0	1569400	1413600	0	0	1620500	0	1228700	0	2340300	2014300	0	1842300	2077000	0	2898200	1279500	1403200	1682000	0	0	2294400	2322000	2607500	0	1965600	1369800	0	0	1769000	1410800	1320800	0	0	0
57640000	43292000	39166000	44424000	44572000	34948000	38303000	33013000	49090000	41630000	51001000	44727000	45469000	39594000	41251000	32542000	43281000	88943000	41257000	44512000	47519000	65747000	53052000	52590000	47093000	55333000	49489000	42170000	46076000	43174000	39981000	43477000	42132000	48306000	49561000	49138000	44146000	43003000	40636000	38802000	66877000	86994000	53342000	39656000	64590000	49889000	65275000	50563000	39859000	65016000
187190000	209550000	197520000	228590000	297440000	269780000	293289984	238860000	197970000	229010000	174690000	204020000	231800000	173870000	202650000	222160000	231660000	238930000	221820000	242990000	294030016	255840000	212470000	261540000	238150000	194020000	261430000	279540000	198110000	229660000	211850000	306280000	209190000	266450000	198910000	190040000	233800000	162360000	164990000	226330000	229460000	263320000	194880000	277929984	227390000	232760000	246370000	235810000	224930000	341960000
974590016	1122300032	1088700032	1048000000	1082899968	1057600000	1100300032	1330300032	1058300032	1391000064	1299900032	1437699968	881529984	1104499968	1286000000	1203600000	1084400000	1124700032	1324400000	1230300032	1081500032	1256499968	1182000000	1276400000	1061500032	1145699968	1398700032	1316700032	1003000000	1217900032	1110300032	1207500032	816929984	986430016	1284300032	1296099968	907089984	1163900032	1024099968	1350599936	1092099968	951280000	1306400000	1299699968	1136700032	1091000064	1071699968	1144499968	854750016	842129984
8274200	8237700	3939400	6511800	5371200	6797700	0	6088800	5792900	8936600	10053000	8588700	10450000	4825300	5665700	6645600	5687400	4146400	10499000	7042200	7267800	7543200	6970300	6633600	7494800	7719700	5357100	9708000	5274900	8873600	11121000	8824300	8279700	5517700	5868400	4965800	7161300	7229300	8355800	8370300	6340300	6076600	12486000	5999400	6766000	5470600	6973300	5111800	11606000	5260300
227170000	326140000	225900000	236220000	279160000	312480000	224910000	249150000	347320000	266480000	215810000	279300000	303129984	276209984	326140000	330009984	325030016	333929984	269230016	286649984	303529984	289630016	258370000	339249984	330720000	310880000	271080000	304360000	267510000	296560000	255970000	272009984	275900000	342860000	327660000	287400000	334300000	301169984	298870016	272249984	259920000	243010000	226100000	248730000	267800000	335740000	294820000	265050000	273740000	190880000
93847000	101940000	105290000	122850000	62371000	74504000	77953000	66276000	97071000	98247000	83676000	115120000	90593000	74614000	80832000	72269000	139550000	122240000	154770000	125740000	56479000	67427000	64355000	75939000	81962000	101160000	83911000	81722000	74700000	65009000	53053000	64276000	95355000	110310000	109330000	90594000	84451000	80496000	114280000	71456000	106890000	125310000	138790000	78800000	88854000	69378000	61907000	43868000	146430000	157760000
109130000	118030000	127520000	109170000	91041000	104630000	130920000	119750000	102840000	107200000	111760000	111540000	106700000	90898000	99700000	102180000	118400000	119360000	130570000	183160000	106100000	103900000	113520000	115580000	118370000	136300000	113970000	101660000	119630000	97784000	107910000	87289000	163570000	188490000	144260000	138810000	105700000	97972000	104260000	104560000	165760000	193460000	212080000	131920000	92950000	76178000	91136000	82724000	298560000	309620000
0	0	0	0	0	2338900	0	0	0	0	0	0	0	0	0	0	0	0	0	0	0	0	0	0	0	0	0	0	0	0	0	0	2859900	0	0	0	0	0	0	0	0	0	0	0	0	0	0	0	0	0
4289700	8866900	5392100	5956300	6266100	5853500	4721000	0	7721200	16995000	8553900	6193100	7857500	7492500	6477600	5267000	8595800	10420000	9664700	6391300	6210800	4865300	3229500	5107800	5347400	4774300	3481900	3145000	9222200	0	9096700	5973600	11473000	0	5234900	7131700	5549200	8341300	10715000	0	4245600	6312100	6630300	0	6287300	7080800	12454000	678120	10388000	3352700
0	0	0	0	0	0	0	0	0	0	0	0	0	0	0	0	0	0	0	0	0	1354300	0	0	0	0	0	0	0	0	0	1988600	0	0	0	0	0	0	3505000	0	0	0	0	0	0	0	0	0	2748800	0
0	15633000	8569500	6579300	0	9459000	8585500	11342000	5574100	5940400	11268000	7246600	6146600	20639000	12169000	7707300	0	11292000	0	0	0	11392000	0	0	9270800	7127000	0	0	11154000	7496000	13209000	6899100	7852500	11190000	6041400	0	14015000	16018000	8529100	0	6778300	12585000	0	0	0	14343000	6705600	0	12867000	9004000
12092000	8407700	9293400	7863000	10952000	8579200	0	9653300	0	13791000	10226000	0	8892700	15646000	15272000	10304000	10878000	10065000	16178000	11329000	10046000	9609700	16734000	9043700	15869000	14261000	9512300	11231000	6792800	16256000	10057000	8481600	10782000	8199300	9432100	9553300	8706400	10765000	11469000	5947000	9105200	11150000	20124000	10935000	11932000	15742000	11201000	8618700	14433000	16375000
0	14077000	6039000	6868500	0	9051400	5460900	7084300	10626000	7703300	7288400	12954000	0	7060700	7737900	5505200	0	8700000	6002100	7497100	0	8351600	6072000	7960300	3369700	14434000	7318100	7330000	12244000	8808700	7061100	6573100	14379000	16652000	9429500	5181500	3597000	0	5594000	5800800	0	0	7482300	8132200	0	8323000	0	0	14805000	0
8768700	6207300	0	0	20307000	8022000	9585900	0	8355900	0	14474000	10634000	0	7402900	7789700	0	13748000	10676000	6218800	0	0	0	0	0	8652100	6394000	6884400	0	10054000	0	0	0	10502000	13276000	16926000	13937000	0	7836600	5502600	11508000	13572000	15647000	13325000	9921900	9526700	0	0	0	12265000	10266000
19932000	16574000	12963000	12792000	15333000	10851000	11785000	10872000	13289000	11328000	14060000	13636000	15238000	7666000	8958900	13674000	17269000	12282000	5572200	18668000	18749000	9855400	17719000	14554000	22139000	13387000	22447000	15645000	14975000	11960000	18941000	14381000	26690000	16323000	9576700	7531900	19562000	14790000	11785000	7661400	13458000	12926000	14203000	16051000	13442000	9002900	10737000	10736000	9682700	21017000
434529984	336609984	336390016	336140000	438209984	349560000	332969984	386009984	227460000	254060000	337460000	270230016	284480000	303849984	366720000	311360000	423380000	369569984	415030016	407420000	264640000	251870000	271220000	308169984	322190016	322969984	393190016	391870016	263710000	236510000	339870016	363729984	342030016	393800000	439160000	344580000	390110016	326150016	308380000	321400000	376720000	417430016	476969984	511460000	370830016	442540000	380040000	390660000	567720000	673320000
225610000	293480000	367740000	365320000	264010000	458910016	339830016	348910016	357660000	288820000	428780000	388249984	216210000	352760000	372760000	389640000	269480000	311920000	437689984	405940000	282860000	311460000	348070016	348009984	279249984	279350016	353580000	351120000	300150016	310540000	362200000	385980000	229840000	315889984	285990016	295380000	198390000	284049984	252220000	360140000	199380000	321270016	365590016	336940000	266930000	323800000	362080000	377440000	145000000	196800000
0	0	0	0	0	0	0	0	0	0	0	0	0	1631000	0	0	0	0	2394200	0	0	0	0	0	0	0	0	0	0	0	0	0	1787300	0	0	0	0	0	0	0	0	0	0	0	0	0	0	0	0	0
28018000	29006000	25957000	26491000	22538000	23578000	22791000	20076000	30080000	21998000	32004000	27219000	23135000	21182000	20742000	28887000	22348000	30748000	12305000	27858000	25982000	24024000	21419000	29886000	26604000	30336000	24384000	29598000	27584000	40021000	22694000	31311000	27815000	26134000	22647000	23320000	18296000	20053000	24015000	34031000	29060000	21639000	22511000	20726000	35898000	33290000	24763000	23709000	22834000	20486000
34739000	27344000	41139000	37425000	31549000	35053000	33911000	32397000	39602000	28961000	28727000	22573000	30178000	25689000	33382000	25149000	25714000	29824000	31535000	31825000	0	48088000	33554000	48110000	26755000	23923000	30910000	28178000	33516000	34727000	38565000	33713000	27034000	26705000	25540000	25020000	37676000	47702000	45722000	38594000	29331000	23465000	20758000	27557000	35054000	43979000	36991000	48111000	32002000	20804000
0	0	0	0	0	0	0	0	0	0	0	0	0	2845100	0	0	0	1320300	0	0	0	1333900	0	0	0	2900100	0	0	980400	0	0	0	0	2825500	0	0	0	1397100	0	0	0	1822300	0	0	0	2689800	0	0	0	0
117550000	127070000	111880000	95898000	86302000	111890000	93738000	108670000	86886000	129820000	124770000	108230000	100260000	106050000	76941000	115770000	133320000	87065000	89159000	116970000	116920000	86107000	88000000	94443000	82929000	119270000	110140000	100620000	98661000	105160000	105500000	89340000	127700000	99204000	92596000	115230000	124960000	98654000	121280000	93975000	98232000	91533000	89275000	126740000	147800000	81361000	112760000	101880000	168670000	129890000
0	0	0	0	0	0	14322000	12812000	0	0	0	12611000	0	0	9582300	13654000	0	0	9778300	14242000	0	0	0	13965000	0	0	0	9479200	10428000	0	7390000	10717000	0	0	0	0	0	0	0	0	11039000	0	0	0	0	8700900	0	0	0	0
1097699968	97331000	0	71217000	186550000	86937000	88299000	141450000	158080000	0	56469000	84319000	139080000	226190000	146900000	132460000	111160000	266090000	42560000	55480000	145890000	102520000	83044000	133820000	119420000	368600000	261770000	138120000	401110016	114770000	72825000	72274000	155720000	119150000	144490000	131300000	184930000	183780000	133850000	244300000	0	121530000	175480000	0	165760000	183900000	139220000	155190000	181810000	67629000
277360000	305110016	277769984	314470016	293089984	340110016	296140000	292190016	332289984	310950016	341420000	318590016	227230000	216280000	255970000	259890000	207750000	264220000	328580000	253240000	274910016	312070016	278040000	325230016	252680000	292310016	321960000	323470016	285300000	302910016	304070016	321710016	202490000	256710000	280160000	265220000	193880000	228670000	215140000	267300000	329870016	329600000	319940000	386760000	268310000	318070016	283230016	330870016	239230000	346009984
7622100	1576300	2371100	0	2513600	1063200	0	731570	0	750520	0	0	0	0	969050	1140900	2883100	3471500	1873300	1791400	2514400	971200	1399400	1329200	2369800	2405500	2409700	2107500	1915100	0	1460700	3192500	4180100	2633200	2130800	1029800	0	0	1217300	0	2608100	3019200	4512100	1418900	0	4134700	0	2878200	0	7757000
372080000	579310016	468030016	440030016	417060000	391369984	413889984	485480000	477760000	492340000	467900000	535420000	442040000	510160000	420369984	460180000	415769984	519190016	447560000	558360000	490120000	516780000	479840000	481880000	501929984	552840000	573430016	557009984	488460000	526360000	493790016	501700000	428620000	563200000	466769984	546289984	448720000	639859968	488169984	528680000	417780000	543070016	411910016	561340032	396070016	507160000	539889984	535009984	362640000	390140000
2428700	1632700	1928000	0	0	2449700	0	0	0	0	0	0	0	729640	0	0	1802000	3127900	0	0	0	0	0	0	0	0	0	0	0	0	1808500	0	0	2432000	2469100	0	0	0	0	0	1771800	2632300	1849400	0	0	812560	0	0	2055100	3904800
0	7936200	7177900	7954100	4473600	7780800	2545800	4867000	5671800	7469000	6305400	3130800	11430000	8454300	5021800	7098800	2938300	6111700	5314500	6040500	4748900	13517000	6352600	7713100	7018600	40396000	8676700	8286600	5789500	14390000	8673900	13048000	6710700	7930000	6476700	6331900	0	0	6373200	0	3816500	7031500	8725600	11434000	3683200	7917800	6810800	0	20610000	0
0	0	3070000	0	0	0	0	0	0	0	0	3814200	0	3193000	0	0	0	0	0	0	0	0	0	0	0	0	0	3281300	0	0	710390	4532800	0	0	2987100	0	0	0	3859400	0	7229000	0	0	0	0	0	0	0	3999800	0
834979968	1038700032	1002200000	959609984	930430016	915640000	985420032	964849984	758150016	1124099968	988150016	904550016	739809984	1026099968	950329984	872400000	757529984	952870016	893750016	869680000	812550016	861939968	982569984	880649984	980510016	1071500032	752000000	1117100032	926099968	933139968	984960000	786769984	798060032	800640000	842649984	778760000	938040000	892190016	978120000	821580032	894140032	803990016	818630016	851470016	819230016	854019968	981969984	964110016	689049984	704000000
123620000	135530000	228910000	129960000	146160000	177410000	167930000	150470000	137190000	195850000	116910000	134990000	173510000	196230000	218000000	148210000	143420000	135120000	141660000	168680000	143910000	184480000	175840000	179060000	119340000	152080000	199170000	146670000	154310000	131130000	158330000	152820000	117090000	152570000	141140000	104130000	131560000	124700000	146160000	126560000	114850000	154390000	145320000	140120000	113580000	177360000	161760000	149350000	109710000	138340000
19569000	32481000	26797000	28861000	30907000	45134000	33009000	26268000	35383000	34434000	26604000	32879000	40596000	37678000	49645000	28735000	28404000	34329000	34476000	27589000	26642000	47574000	33243000	28145000	25345000	40941000	25332000	25998000	24738000	45349000	21574000	33668000	26261000	29948000	73259000	28045000	35733000	28164000	31333000	26765000	16421000	0	26887000	27523000	28013000	0	17664000	0	22019000	18190000
289369984	238360000	229680000	239030000	233220000	231790000	199930000	219440000	270729984	240770000	234170000	259930000	242810000	253140000	235490000	229130000	303070016	297649984	308960000	245040000	264600000	250940000	255260000	215900000	261160000	251350000	223210000	237620000	211110000	222730000	215080000	230860000	361689984	369320000	277769984	346760000	280660000	297089984	204160000	229940000	345609984	368329984	321809984	324270016	247190000	262030000	262990000	220130000	505720000	562870016
5333000	4095300	3755200	4147600	3974300	4041400	6715500	3944900	2971500	2094200	0	2769000	4136000	3299800	4803300	4172800	3062200	2549700	2886100	3917300	4366400	5579900	10199000	4136900	6262700	3965100	5168100	4205700	5289300	5574900	4573700	3497900	3106900	3460800	5192300	8176100	3748800	2993800	3459400	3193800	4266400	3204000	2941500	3047200	3996800	3604900	4723900	4078200	4969700	2121100
19916000	13547000	7192400	10644000	12859000	11879000	10095000	12646000	61490000	10919000	0	0	13614000	14342000	9664800	10412000	12485000	19449000	3088500	0	18597000	0	0	0	12761000	11997000	0	8551500	13012000	15835000	13647000	1483900	23075000	11231000	11087000	0	23093000	13014000	8643000	10656000	14076000	11931000	7052400	9588700	11738000	9654800	0	9567800	20362000	11810000
471129984	648649984	546950016	606819968	508350016	669240000	541550016	640129984	572620032	544800000	540030016	549409984	458700000	692760000	528809984	588680000	502129984	516760000	589729984	604300032	508160000	511230016	598710016	686809984	590209984	593699968	561320000	548520000	601689984	525209984	553299968	604280000	408769984	500080000	504849984	621660032	412049984	560540032	493320000	444860000	438360000	569880000	456769984	565289984	453790016	645020032	546800000	565510016	322409984	337640000
9761700	0	0	2697800	0	5605400	5907900	0	0	0	0	0	0	0	5924800	0	0	4006500	0	2978900	0	0	3642600	0	0	4966100	5002700	3466900	0	3575500	7099100	3219600	0	0	5682100	4912300	6806400	0	4115700	0	0	5456900	0	3807900	0	0	0	0	0	0
0	0	4432500	0	0	0	0	0	0	0	0	6201600	0	0	0	0	0	0	0	0	0	0	0	0	0	0	0	0	0	0	0	0	0	0	0	0	0	0	7697900	0	0	16440000	0	0	0	4381000	0	0	0	10774000
5629200	0	3510200	0	5729500	9939500	8468700	5373600	6357800	0	6402000	5045600	5896300	5125200	6574000	4360900	5583100	5367000	0	3522300	7226000	7517100	6218200	4737900	7159400	5969300	0	0	5213400	4278300	3579500	3551800	1494600	9008300	5311200	0	0	3929900	4512400	0	4395500	4382600	0	2833700	0	0	0	0	1191300	6721800
0	1355400	0	0	0	2507500	3474000	0	3175200	0	0	0	1244300	3213400	0	0	0	9185100	0	0	0	0	0	0	7161900	0	0	7729900	2190400	0	4215900	0	0	2982700	3122100	0	3082700	2635200	2209300	0	0	2314400	2459700	0	0	0	0	0	0	5138000
0	0	1222500	0	0	0	0	0	0	0	0	0	0	0	0	1385200	0	0	0	0	0	0	0	0	0	0	0	0	273830	0	0	718950	0	0	0	1811300	0	0	0	0	519550	0	3170500	0	1159800	0	617390	0	0	0
30081000	0	15545000	22408000	8755100	0	14890000	0	9380800	17133000	16710000	0	17458000	7892100	15560000	15666000	19076000	9826100	15759000	25314000	0	0	13618000	17494000	11126000	6224000	21186000	13571000	21328000	13234000	19266000	23896000	10977000	16421000	9984400	16362000	10916000	21786000	14476000	15588000	9678600	7897700	15263000	26694000	10618000	11773000	10781000	10421000	0	16870000
34178000	53213000	35920000	48380000	34377000	45750000	68535000	58859000	33133000	48444000	115830000	56191000	33359000	31181000	32402000	32947000	33507000	44099000	49929000	68687000	26016000	58684000	38101000	61726000	30225000	38621000	55250000	41957000	48983000	31678000	59670000	40288000	49210000	36704000	37324000	80797000	58960000	39552000	42729000	27849000	58118000	54030000	41664000	33453000	64545000	49352000	55660000	61197000	27669000	62102000
16937000	11872000	11191000	0	10048000	3608500	3732800	11162000	8925700	10146000	6403600	10074000	10794000	7750400	6002400	0	11510000	9564100	0	11660000	10186000	14224000	0	10848000	11753000	16104000	11118000	8682500	14242000	10025000	6255600	11338000	22762000	15709000	6112500	5700700	10704000	6485900	11982000	9034000	19878000	10122000	9994900	6173200	11612000	14179000	8813800	0	28467000	24531000
16947000	20393000	16161000	19408000	22367000	18094000	19272000	14914000	21070000	18561000	17932000	20449000	37024000	18203000	16153000	17114000	20425000	20959000	14807000	18308000	24258000	17806000	19154000	14577000	22101000	19112000	18210000	17218000	12555000	21843000	18485000	14324000	18201000	22002000	15026000	18273000	15146000	17989000	21905000	10696000	23931000	25085000	17278000	13180000	18006000	16074000	14951000	11937000	27882000	22307000
0	2450600	0	2510300	2662700	1737700	1976600	1905100	4298800	1842600	0	0	4013600	2022600	2330600	3578200	2814700	2301900	1423100	2173200	9629000	2354700	3275500	3398300	5782500	2326600	4118200	2277600	2048700	2049100	2816400	2123900	0	3422400	0	0	2239100	0	2862800	0	2771900	1942000	2273500	0	2811500	1931100	0	2396600	0	0
0	0	1097900	0	0	0	0	0	0	0	0	1531000	859730	0	0	2082400	0	2263800	0	1971300	712100	0	812320	0	1322500	0	0	0	0	0	1479100	0	0	0	933010	0	0	0	0	0	0	1219600	0	0	1183100	0	0	0	0	0
555340032	617400000	787059968	599859968	590950016	523480000	579230016	558550016	539139968	540510016	605030016	519830016	526460000	457750016	585169984	689470016	556729984	484990016	632419968	601529984	548259968	504520000	575790016	541769984	538209984	629070016	548560000	669560000	556849984	631120000	614099968	603510016	683139968	570460032	617190016	520369984	623699968	589139968	580339968	588840000	608670016	572680000	625320000	529740000	612880000	603560000	728390016	705889984	703500032	577790016
1182599936	1284400000	1369900032	1303600000	1131600000	1324300032	1331000064	1401299968	1141200000	1290499968	1163800064	1147000064	1016800000	1247000064	1355399936	1385799936	1018000000	1189600000	1582700032	1291500032	1110300032	1211100032	1266899968	1401299968	1035699968	1143800064	1322800000	1275000064	1178200064	1266300032	1262099968	1527900032	1041299968	1185600000	1288300032	1401799936	1195699968	1139600000	1221500032	1499699968	1065900032	1190599936	1374499968	1806300032	1209799936	1298499968	1457799936	1874599936	1363000064	1127699968
0	0	0	0	0	0	0	0	0	0	0	0	0	0	0	0	0	336910	0	0	0	0	0	0	0	0	0	0	0	0	0	0	0	689880	0	0	0	0	0	0	0	0	0	0	0	0	0	0	0	0
412190016	363310016	497580000	446040000	433670016	585619968	505820000	478969984	374540000	497889984	535289984	413089984	600860032	702630016	708360000	674400000	469080000	537390016	607880000	514960000	534120000	542560000	615889984	535369984	425900000	504980000	515670016	456500000	495129984	538380032	609089984	419480000	541950016	531100000	565950016	532680000	663510016	561580032	667340032	676329984	400929984	316980000	436560000	463400000	607169984	534300000	559849984	674830016	358580000	356560000
0	0	0	0	0	0	0	0	0	0	0	0	0	0	0	0	0	0	0	0	0	0	0	0	0	0	0	1959000	0	0	0	0	0	0	0	0	0	0	0	0	0	0	1354900	0	7209600	0	0	0	0	0
239430000	293980000	294969984	286710016	192980000	178640000	240020000	223550000	222910000	204260000	183290000	191970000	270470016	213520000	192710000	215180000	214550000	309550016	212540000	227630000	258770000	288489984	199390000	202250000	227580000	196540000	246940000	186710000	266720000	167080000	216080000	213660000	194030000	264400000	218780000	242260000	203010000	244920000	225730000	243720000	221130000	187790000	220560000	194920000	265340000	203530000	287600000	255300000	218040000	282230016
18371000	29249000	21806000	20665000	26327000	25407000	24220000	21511000	26499000	18792000	24325000	558410	23481000	21264000	19169000	20341000	19343000	26539000	16167000	20224000	24590000	24745000	20012000	20115000	34869000	33182000	18797000	18826000	36286000	27654000	27167000	23914000	22842000	21997000	22869000	18204000	24110000	23502000	19808000	22593000	16382000	18755000	16078000	19125000	27962000	16972000	23753000	27285000	29326000	25589000
291150016	276649984	281620000	282340000	275980000	313710016	253550000	277950016	294110016	279140000	275420000	293449984	309369984	288049984	320670016	282190016	268800000	262240000	314409984	267690000	262270000	266890000	253410000	268470016	252350000	278590016	293960000	277689984	253810000	258720000	295849984	274140000	271060000	282260000	261320000	254060000	256980000	268160000	305460000	308350016	262580000	245050000	286780000	237780000	264820000	279889984	305630016	306700000	224260000	173640000
224430000	283489984	321289984	284649984	237640000	324840000	313689984	279990016	198390000	199760000	231980000	263970000	245860000	304320000	310140000	284350016	222780000	280300000	302430016	266690000	258960000	276649984	335430016	285940000	242390000	277030016	282489984	307969984	263050000	283190016	323009984	286390016	216800000	235280000	316750016	292840000	235430000	306409984	251300000	357360000	239690000	274030016	287089984	385780000	272980000	331520000	296600000	433190016	282169984	278350016
20019000	20787000	18605000	16707000	20772000	25765000	14425000	12791000	10343000	10214000	15871000	17762000	15378000	15607000	14324000	19164000	18526000	14092000	12823000	10842000	21906000	18937000	16942000	15458000	16243000	11456000	15543000	15077000	12649000	15627000	10006000	18757000	13190000	16326000	16715000	15397000	12656000	17080000	13637000	14062000	14968000	14801000	13309000	13100000	22828000	14085000	13470000	14647000	16943000	15778000
124330000	105500000	133520000	136570000	149920000	102780000	182150000	150880000	136960000	111890000	144130000	156250000	118370000	125960000	175270000	163290000	115210000	108190000	236310000	151710000	109960000	114140000	136260000	196820000	111300000	105280000	132090000	140620000	114810000	131440000	135310000	142330000	129150000	154700000	172230000	186240000	104830000	108010000	112970000	146590000	153170000	135130000	158760000	177140000	118230000	116470000	123140000	155030000	131340000	132140000
1670700032	1179100032	1216499968	1222099968	1867500032	1488400000	1839000064	1473100032	2107399936	1610200064	1032099968	987580032	1678800000	897500032	759180032	1180499968	1145799936	1368800000	463649984	1187000064	2356900096	1414400000	1236499968	1510599936	1616600064	1655699968	1038899968	1203100032	1387000064	1154599936	1451900032	780460032	1448800000	1392999936	671769984	908099968	5058599936	1494400000	1021699968	617180032	1131699968	1106000000	1806099968	927420032	1626400000	1460199936	1384700032	886060032	1716700032	1388199936
3842400	0	0	0	0	0	4325200	3726300	2637100	0	3771400	6213800	6703700	6475100	3966600	0	2431300	5524000	7907500	5409600	0	0	4664400	0	3778100	5174500	0	11833000	3211500	3683100	5536700	6206800	3309300	4683400	3515600	0	0	0	0	0	8025900	0	3273600	0	5620900	5189600	0	0	5279700	0
18703000	22951000	18750000	23206000	21793000	15572000	18962000	13970000	19762000	14125000	23034000	18251000	27280000	42805000	17264000	17935000	27259000	22189000	17518000	23769000	30936000	22353000	28373000	18742000	20754000	12238000	18034000	26582000	17716000	21521000	18907000	27140000	30679000	25615000	26562000	20829000	19862000	30111000	15894000	18885000	23122000	19173000	29097000	25810000	24390000	36496000	18966000	16047000	25876000	30785000
15113000	20103000	22578000	24855000	19942000	26930000	27610000	18181000	19870000	24089000	19673000	25483000	20398000	24575000	11216000	27467000	16181000	24382000	27724000	17259000	17211000	47941000	19787000	24437000	19106000	20712000	22779000	21924000	23647000	14640000	21509000	20306000	24902000	21824000	25736000	32803000	17977000	32653000	18504000	23293000	22484000	29720000	21355000	19494000	22377000	15063000	27644000	22929000	22099000	29225000
113770000	124390000	134280000	162090000	133510000	124320000	177270000	168120000	132680000	153540000	160120000	202340000	130710000	148250000	172890000	174310000	138350000	148350000	182510000	161060000	143170000	140900000	149420000	166700000	147750000	178080000	149440000	160650000	128930000	166010000	164170000	172120000	148350000	112890000	179370000	139350000	112200000	117520000	138680000	164550000	147610000	176760000	153230000	180490000	121810000	155380000	147950000	177890000	113250000	141430000
41164000	75120000	46670000	35309000	37287000	40198000	61132000	30607000	48204000	107830000	37576000	38109000	50134000	42543000	36280000	42498000	68942000	95973000	22488000	43222000	67318000	51585000	42026000	41207000	46970000	44742000	0	41636000	40708000	75637000	35050000	41969000	35700000	44794000	37260000	27760000	38859000	68543000	38234000	32305000	41941000	46274000	34141000	24376000	40766000	0	46301000	40186000	43923000	44755000
0	2656900	0	0	0	0	0	0	0	0	0	0	0	3054300	0	0	0	0	0	0	0	4554400	0	0	3032600	0	0	0	0	0	0	0	0	0	0	0	0	0	0	0	0	7298400	0	0	0	4718500	0	0	0	3059900
0	0	1199200	902090	992780	829650	1482600	0	0	0	0	0	922540	857760	993920	739980	2549700	721500	0	636230	686210	860890	0	0	0	0	1001500	700190	0	0	1394000	967700	0	0	1334000	0	0	0	0	1040000	0	1390700	843410	0	554440	959810	902460	0	0	0
0	0	0	0	0	0	0	0	0	0	0	0	139490	0	0	0	0	0	0	0	0	0	0	0	0	0	0	0	0	0	0	0	0	0	0	0	0	0	0	0	0	0	0	0	0	0	0	0	0	0
11698000	15687000	6860100	0	15820000	10571000	11089000	19929000	0	6687900	8452200	10928000	9570200	10199000	11319000	0	6833600	7324000	6001200	0	45994000	11679000	51187000	10547000	13063000	10463000	8253200	9395900	6604700	0	8701400	7112100	11658000	8541200	5877200	0	39224000	12038000	0	0	10194000	14043000	7810900	0	14503000	13021000	15207000	0	10837000	12669000
15432000	6282700	15432000	11107000	10810000	12481000	13675000	15103000	13906000	7458100	16736000	13456000	18761000	17622000	13733000	22648000	33852000	23475000	17146000	15955000	22037000	52985000	15623000	21532000	11734000	14102000	12868000	18052000	10647000	17832000	15253000	16398000	23008000	9493100	17362000	4617600	14268000	21660000	9410400	0	7353100	11975000	13794000	13521000	16415000	10072000	8567900	9422700	16291000	15958000
234260000	248300000	236590000	236290000	220300000	236200000	213150000	222220000	244150000	208740000	210880000	223360000	198430000	245630000	214470000	226270000	237700000	294470016	242910000	254110000	199330000	251460000	236670000	225790000	267550000	261090000	267070000	232310000	264250000	237540000	213240000	238220000	240870000	263860000	231310000	206320000	195640000	236460000	214500000	205330000	261430000	241960000	232580000	270630016	217780000	246150000	199610000	230480000	320800000	297600000
1664900	1579800	0	0	1750300	1619500	0	0	1699800	0	0	0	1334500	0	0	0	955890	1805300	0	0	1711200	0	0	0	2850600	0	1469700	1924000	884570	0	2038900	0	1412500	2035900	0	1776700	0	839110	0	0	2575500	1954500	2907300	0	2395300	1275500	0	0	2240100	0
25108000	31982000	37955000	30207000	25256000	37399000	44854000	29103000	34851000	49356000	33860000	55091000	21276000	29237000	35932000	36457000	39155000	47668000	38187000	38261000	31643000	32166000	42620000	52876000	40717000	46131000	38197000	48010000	39185000	40345000	30044000	51723000	26209000	40631000	36729000	32622000	19504000	41356000	34188000	21551000	29303000	49344000	39599000	50333000	43734000	40571000	60841000	51869000	24227000	31866000
175080000	255390000	235730000	215060000	186730000	192180000	192380000	167950000	188750000	163850000	231230000	339270016	186460000	341360000	186200000	223970000	315990016	288880000	193700000	199610000	306790016	383220000	209840000	197160000	227640000	254540000	202070000	206110000	228790000	281080000	238570000	242250000	206480000	202470000	181750000	134620000	177270000	195610000	272910016	148570000	220260000	196730000	275460000	228920000	218800000	217050000	213000000	201950000	205140000	132380000
47769000	125770000	74675000	81030000	51082000	64254000	110500000	72981000	85358000	84362000	138260000	110310000	154250000	118150000	128850000	68291000	95471000	78910000	76666000	75087000	91347000	88205000	66819000	69416000	62474000	87050000	112160000	75288000	66778000	54020000	61726000	58437000	55952000	87118000	108820000	60346000	82602000	89103000	73262000	35075000	61628000	95467000	80457000	37011000	48152000	87286000	48758000	116030000	56794000	39300000
24755000	19929000	19518000	18271000	26422000	14604000	0	28445000	26957000	29670000	18988000	34287000	24613000	24769000	20989000	22633000	24301000	22057000	29385000	26117000	19693000	17179000	18109000	18966000	16024000	22308000	18278000	14425000	21249000	17735000	19285000	18484000	20813000	30656000	22490000	24052000	24324000	21665000	27798000	23458000	20995000	21042000	18266000	14058000	16718000	24850000	18287000	30700000	25920000	23513000
18948000	18473000	15175000	15447000	16474000	19869000	14329000	17037000	19427000	19042000	18319000	15355000	28618000	18225000	22142000	17693000	16437000	15985000	18604000	18965000	17080000	22539000	16998000	20048000	27500000	18654000	21857000	16821000	18382000	15408000	20569000	18099000	20397000	21952000	18785000	11221000	17956000	18970000	19797000	20642000	18669000	17474000	30144000	15935000	26541000	21625000	7128500	18324000	14812000	23046000
0	0	0	0	0	0	0	0	0	0	0	0	0	0	0	0	2439400	0	0	0	0	0	0	0	0	0	0	0	0	0	0	0	0	0	0	0	0	0	0	0	0	0	0	0	0	0	0	0	0	0
178050000	199670000	177250000	174120000	283030016	206420000	162880000	222630000	230450000	212580000	229280000	220550000	254780000	226070000	196940000	181700000	199770000	223150000	250690000	207950000	201460000	179380000	248600000	204280000	182270000	244700000	194560000	175630000	162450000	257920000	196770000	187450000	171230000	242490000	138540000	258020000	166270000	219270000	123760000	217550000	201910000	240730000	136230000	195840000	180470000	207550000	152200000	192700000	314510016	189850000
1806800	0	1811600	3039000	2629200	0	3075900	2655700	3587700	1564900	0	2290600	2881000	0	3062500	0	2821500	1670300	0	2678700	2100700	0	3615100	3269200	2307700	0	3913300	0	2900700	0	0	2522700	0	3673600	0	3038800	2118300	3227400	1548900	0	2343500	0	4198700	0	3058400	0	0	1316300	0	2501100
1497900	1494300	1015700	0	1122300	1021100	0	0	1888300	1390100	0	0	0	0	0	0	0	0	0	0	0	1337800	0	0	1108200	845630	0	0	862430	0	0	0	0	888170	0	0	0	1079700	0	0	2064500	0	0	0	0	0	0	0	0	0
10619000	10677000	10721000	12078000	12358000	14566000	15319000	10708000	9174500	19104000	8602200	14142000	6570800	12311000	9339000	10996000	9462500	10644000	0	14495000	10669000	12211000	0	10846000	10824000	12457000	11088000	11510000	11138000	4912300	10241000	12253000	11304000	6598100	13525000	12813000	10972000	8070000	14832000	6823200	10045000	10153000	10283000	11733000	7268100	8243100	3037800	3659500	8993500	8797900
2328600	33742000	30664000	38652000	30965000	32148000	27762000	34213000	26330000	43594000	36569000	43868000	33880000	26838000	26418000	32620000	25129000	30845000	40781000	33091000	39255000	38821000	30657000	35984000	38005000	33014000	29660000	32778000	35449000	39078000	41357000	41697000	27668000	31693000	23157000	45361000	27394000	29714000	29593000	45380000	25211000	34214000	22473000	38140000	43393000	26932000	31726000	33275000	36609000	39319000
121890000	115550000	143520000	103420000	103070000	102600000	127520000	112120000	132580000	103960000	136050000	140320000	91431000	105290000	85631000	93701000	120430000	101170000	118360000	88868000	152440000	131890000	114870000	104820000	146220000	148740000	146040000	91401000	146480000	125790000	122990000	135310000	114760000	121830000	141480000	94779000	94349000	117880000	124180000	128900000	95211000	118760000	112730000	94862000	91489000	125910000	107390000	90491000	141260000	153770000
10159000	18007000	24420000	25818000	18535000	19445000	31915000	24576000	28431000	23369000	26028000	35766000	13739000	21759000	12131000	17963000	19468000	39704000	21472000	45906000	20182000	21294000	25365000	27139000	24345000	18443000	21230000	20193000	22007000	16275000	24098000	17637000	14462000	18196000	14767000	19908000	13203000	18406000	13305000	15192000	29374000	18859000	26780000	10025000	18190000	21543000	21830000	33861000	14049000	30158000
91063000	92831000	81575000	75254000	74224000	64106000	55569000	114340000	255940000	80330000	54476000	78301000	72559000	89796000	72584000	80139000	250440000	125410000	50964000	114150000	144300000	58955000	91689000	101960000	94949000	117730000	88042000	53283000	87183000	129290000	75583000	82922000	81352000	84740000	75895000	72637000	61340000	90654000	84502000	111310000	92784000	97876000	81738000	129320000	68215000	78301000	69831000	110690000	84619000	90179000
93231000	128810000	119410000	126820000	103560000	91333000	99892000	103060000	111760000	102240000	114480000	129350000	96126000	103790000	82505000	112410000	113460000	137900000	119830000	138400000	111110000	120100000	122570000	126750000	112580000	131180000	133470000	127190000	98381000	119670000	102550000	98631000	108840000	138350000	129790000	136370000	112680000	126150000	132550000	90452000	117690000	157350000	138020000	135080000	82017000	135810000	88886000	100720000	222510000	118080000
10124000	11863000	12440000	10188000	11139000	11523000	12608000	9311700	0	0	11460000	0	10984000	0	9171600	6740300	9775300	0	0	8205600	12241000	12732000	11627000	9070400	12256000	12041000	16660000	12832000	8342400	0	11086000	7017100	13392000	11620000	13646000	7767400	9590900	8889900	11856000	11722000	18183000	13025000	17810000	16786000	16263000	10182000	11457000	16336000	16460000	12423000
56480000	68859000	65802000	69297000	63299000	66801000	51651000	67015000	63910000	85059000	66953000	70080000	76506000	74103000	68871000	71551000	64212000	63823000	69527000	84575000	88265000	71502000	70200000	93860000	61676000	62332000	62378000	87583000	69262000	89574000	75414000	80746000	48810000	67488000	69963000	72677000	50639000	68784000	63832000	64935000	93292000	74810000	82735000	72200000	54523000	72170000	75230000	79713000	117380000	76220000
25835000	31117000	41337000	22543000	26888000	34879000	31676000	33422000	39086000	25903000	25295000	25189000	29975000	38658000	39684000	42633000	42894000	31686000	24054000	33205000	55533000	36766000	34194000	29645000	37478000	26337000	20234000	37247000	36868000	24970000	26104000	32456000	23854000	27703000	20676000	18654000	15206000	32783000	26158000	25159000	27034000	24556000	26613000	28812000	36528000	36971000	30153000	29940000	11639000	31237000
0	0	0	0	0	0	0	0	0	0	0	0	0	0	0	0	0	0	0	0	0	0	0	0	0	0	0	0	109220000	0	0	0	0	0	0	0	0	31291000	0	0	0	0	0	0	0	0	0	0	0	0
0	0	2745700	1184300	0	0	2374800	1995800	0	0	0	4211400	0	0	6652400	1623400	0	0	0	0	0	0	0	3155900	0	0	0	0	2916400	0	0	3737900	0	0	0	0	0	0	1988200	1726500	0	0	0	0	0	2640300	1288500	2244400	0	0
209430000	203070000	292780000	226880000	305430016	177980000	237630000	264560000	170040000	173060000	203600000	257040000	299320000	270640000	288649984	235790000	256230000	199400000	201740000	259600000	263170000	245680000	271520000	236920000	292020000	220510000	275649984	238600000	227850000	235010000	196990000	227760000	206350000	197830000	196420000	218250000	182960000	195770000	210180000	190390000	227070000	227030000	280780000	214080000	191790000	188540000	216770000	240320000	220630000	191710000
0	0	0	986010	0	0	0	1547700	0	1605500	0	1610200	0	0	1779600	990200	0	0	0	1248200	0	0	0	2392900	0	0	1093600	0	1040100	0	1450200	2259900	0	0	0	0	0	0	0	0	0	0	806450	0	0	0	0	1376600	0	0
9322700	20759000	23758000	17105000	29449000	20548000	23635000	21199000	16298000	17302000	19275000	13041000	18495000	30553000	27838000	29821000	17575000	16812000	16465000	25326000	29993000	32358000	24239000	33951000	18260000	24698000	21743000	17132000	23694000	30657000	21568000	19379000	18622000	15276000	13349000	13967000	17655000	25311000	18473000	18132000	21525000	13053000	16085000	8438700	21801000	18392000	21791000	17667000	13794000	13246000
0	0	1617200	0	0	0	0	0	0	2635400	0	1738000	0	0	0	1775600	0	0	0	2060900	0	0	0	0	0	0	3533200	2105600	0	0	0	0	0	0	0	0	0	0	2412800	0	0	0	0	2596300	0	2233500	0	0	0	0
77065000	55555000	49566000	60705000	71766000	53460000	72233000	71466000	56509000	61093000	73331000	63805000	93370000	60523000	76726000	89067000	72340000	73029000	74382000	69329000	64323000	57917000	76711000	77480000	71750000	64084000	78783000	81428000	78100000	62167000	57091000	66333000	75159000	53438000	63391000	31670000	64847000	62484000	58680000	49147000	86052000	48365000	45850000	41405000	55726000	46405000	48417000	58466000	84659000	63486000
39256000	44770000	40768000	33420000	30694000	36152000	33582000	33221000	38617000	12338000	50838000	37591000	40053000	37235000	39689000	29609000	40687000	40818000	38846000	43083000	36892000	32073000	29566000	39784000	45370000	53807000	45627000	39956000	41234000	48119000	44365000	35455000	48039000	39428000	52201000	23545000	33998000	45327000	24499000	37548000	46987000	42436000	36774000	37495000	51117000	46280000	48524000	29709000	69346000	41711000
83486000	86276000	104730000	90510000	74630000	73666000	69942000	69790000	79211000	70125000	69834000	54627000	69044000	74065000	13589000	91975000	153260000	104940000	79413000	64240000	77402000	94917000	0	87695000	79286000	98026000	66497000	56662000	109560000	74683000	81759000	71288000	59187000	95090000	83555000	17902000	64082000	91746000	88362000	63912000	62222000	99956000	62393000	74373000	108760000	80260000	66074000	64042000	73380000	85044000
0	0	0	0	6550200	7764900	3949300	5601500	2981400	3160400	4860200	9645600	0	0	0	7691400	0	0	2430200	0	3307900	4183100	4267500	4273500	0	4515000	4295900	4186600	5987900	8502200	4407500	6658700	0	4095300	4117000	2735000	2151300	7157800	4801000	6633600	8864500	14527000	14883000	13888000	0	0	0	0	4152300	0
0	0	4926300	4243600	5768500	19656000	6461900	0	10339000	13527000	5395800	0	0	4621700	5461700	0	7898600	10682000	10040000	5005700	0	3729400	3743300	3624800	10447000	9092900	4841500	8393100	4948800	0	2698200	0	5162500	7304200	6911700	6231100	0	8116800	0	0	8604400	10088000	9862100	9595100	8305100	7122300	5313000	2636200	11434000	7042100
8771700	7776700	9958500	9332800	9275400	0	12048000	8075400	0	8569500	4511900	4735600	4888000	0	9207800	13274000	8547800	0	15808000	8019600	9642700	0	12696000	6446500	8027700	7568900	12386000	5683100	5630900	8922500	6413900	7988000	14747000	8412100	0	15464000	9473200	6879700	0	10545000	0	11102000	8830200	5817500	8393400	8830000	0	9356800	7726800	8383400
466760000	376289984	435840000	567420032	491940000	502620000	502640000	715660032	613260032	587080000	704150016	663230016	505300000	575289984	587550016	539569984	461080000	457649984	442460000	578120000	439710016	528980000	425600000	524440000	432710016	540769984	563619968	556099968	458580000	402200000	442849984	449409984	364760000	454980000	411470016	351480000	460009984	459809984	436689984	480920000	370440000	416560000	583260032	400020000	387790016	377380000	460569984	502840000	479470016	406190016
21909000	23164000	19322000	27552000	19317000	19172000	24289000	31878000	28766000	15400000	16179000	20673000	23083000	27104000	25144000	32445000	14559000	25836000	15457000	28944000	26539000	21761000	21555000	24220000	14742000	15895000	27471000	26772000	27363000	28576000	21376000	31223000	42420000	23026000	28518000	17805000	24687000	18472000	43006000	25918000	29565000	32763000	40510000	41049000	27222000	27658000	32893000	31947000	25938000	27490000
9230800	14061000	8399100	11419000	9144300	7504900	9300300	6904500	9723200	42455000	10566000	6516200	7119600	0	0	9709900	8589300	10353000	7291600	9857300	10312000	13620000	10966000	7001700	9676000	5273200	6269700	7007300	12202000	6232900	6722100	7806100	9843600	14823000	11566000	10468000	7497200	11246000	10504000	6687600	10785000	11570000	8748900	7214600	7618300	9378900	11650000	6160600	8007600	7045600
12207000	0	10925000	10388000	34184000	25507000	29678000	30654000	47105000	29903000	31011000	38618000	35892000	42478000	33651000	34819000	76209000	55468000	39860000	59226000	32274000	27093000	34229000	22730000	7809100	18250000	17113000	14555000	4393200	26045000	15318000	13920000	127260000	115670000	84267000	84344000	169600000	121260000	116830000	86317000	41311000	26031000	41723000	28737000	31624000	28047000	56089000	29586000	277929984	270720000
4132300	0	2746900	3445300	2828200	3028400	3387500	3402600	2668700	2662400	4909200	2257000	2736500	2211000	3030300	3113000	5712700	3023900	2321500	4277800	3558600	2749500	3775000	3025800	3978300	3548200	3792100	3771800	3073600	3316900	1957100	2644300	0	5411700	2485200	0	3416300	2603400	2820200	2185500	0	3462700	4855000	2196900	0	0	0	0	6039800	0
235040000	215290000	256140000	210210000	248220000	270340000	290080000	262010000	308840000	300140000	302560000	238600000	266150000	303689984	329070016	259430000	299400000	231410000	184700000	307240000	290929984	259580000	222080000	311369984	277720000	308830016	294380000	253370000	407880000	297660000	294009984	348540000	351280000	313200000	278820000	250860000	466889984	282600000	263810000	253430000	347960000	239450000	256430000	225330000	345520000	246730000	247290000	221600000	287569984	202030000
27328000	17097000	13614000	21166000	12868000	18120000	14113000	17666000	29345000	18094000	18246000	20799000	12714000	21919000	19296000	23106000	9147900	22504000	21271000	20923000	17972000	21492000	23852000	21175000	31225000	22693000	23156000	17238000	29094000	18561000	22647000	20817000	27355000	28868000	12078000	18532000	22543000	18058000	12719000	14753000	26583000	30859000	19349000	17527000	19770000	24874000	16336000	9542700	22288000	13463000
7506700	7088300	9048000	0	13527000	6556100	8109800	16040000	9025100	7847100	11378000	12819000	13445000	8946800	12926000	15211000	12075000	5502700	18256000	14074000	8715400	6412500	11431000	16118000	10676000	5453400	7706800	12767000	13868000	5954900	8052500	12481000	12439000	8913400	9545200	12504000	14656000	10634000	9702500	15393000	11475000	9074100	13059000	14835000	35152000	12850000	11629000	19889000	12277000	11477000
239220000	245400000	282240000	411060000	224340000	222760000	374340000	422350016	290830016	327409984	284769984	418089984	275649984	282190016	289000000	302500000	310080000	318180000	372880000	343190016	367630016	340609984	333380000	341889984	263210000	278880000	330350016	332080000	254930000	286860000	314910016	304449984	259600000	337489984	274240000	421900000	203860000	304049984	272680000	285580000	360169984	332849984	374329984	317040000	218450000	262150000	275230016	286920000	192340000	320289984
7938600	0	5080400	9170900	8310700	11747000	11024000	10540000	8791400	13880000	11260000	7989700	5728000	8659000	5791200	8075000	6079300	5799200	10834000	8349100	0	0	3799200	3832100	5301800	7047900	7361000	9001800	5822000	9172000	9147100	5467400	10398000	17454000	11722000	9633500	5280800	4493000	10898000	7992100	13519000	11759000	11287000	9656000	3532100	0	4100000	0	0	7345400
67319000	89374000	120300000	80811000	65689000	76631000	89381000	80138000	74036000	82434000	42603000	40408000	76965000	91657000	98520000	64635000	87902000	72382000	90228000	62477000	77560000	73618000	97646000	80307000	72345000	80472000	80186000	74501000	63533000	84208000	67335000	78529000	80174000	73440000	98539000	107540000	63348000	66393000	81536000	42453000	76852000	66949000	88206000	18703000	63843000	60007000	89343000	78929000	104470000	94523000
0	21716000	25346000	17166000	0	0	0	0	105710000	40906000	0	0	0	75020000	0	0	29178000	0	0	33011000	39397000	0	0	0	26760000	0	33429000	28115000	0	94689000	50728000	64173000	0	78825000	0	0	0	0	48803000	0	0	0	0	0	0	0	58758000	0	43890000	121400000
14713000	5479800	4075200	6251400	7081300	4605000	1309300	9814300	5394900	1179600	8083100	10076000	7025600	4542500	6635300	4637700	5194200	0	18114000	10910000	11873000	4079200	6709300	5390000	6049100	11813000	4368800	2374500	5537300	4498400	5790100	7138100	5513500	4362100	0	0	7243200	5150400	0	0	16519000	3192300	0	5564300	3819500	3967100	5338000	7691100	6640000	3879900
5614100	4120500	7763000	0	5250000	4809600	5509300	5538900	0	5532100	7978200	4981400	5957200	5704000	7114400	7133600	6190300	5170300	7130700	0	5911800	5203300	7148500	6822600	0	4867700	7450800	7282900	0	4942600	4271300	6087600	0	0	5818300	6801200	7712100	0	0	4969800	10098000	0	4869600	7373800	8187600	0	0	4147300	5378600	0
323580000	371240000	491809984	412190016	318889984	312329984	439400000	523870016	423369984	412560000	349940000	474630016	430880000	378070016	408649984	391800000	347849984	412720000	340500000	457860000	392180000	412540000	597710016	612510016	452700000	448329984	676169984	416670016	423590016	442049984	558899968	455820000	402200000	353289984	417980000	434009984	344089984	365929984	400249984	400380000	336550016	436880000	457880000	538670016	400560000	378870016	422249984	524049984	362289984	264500000
6140300	3202100	6803900	4813500	5209600	3424600	4198800	5148600	3434100	3653200	1727200	2529700	8052800	3792100	4817300	4913400	16766000	4901800	3977900	3887300	4072700	7328600	6704600	6192600	7572200	6493700	3831800	4335000	4930100	4631200	3080800	3329100	3960700	3070500	4010000	7822600	3374400	2699800	3396700	1864300	5184600	7089800	3481000	2068500	10038000	6516500	3650800	3675500	0	3309400
181110000	213530000	186770000	175530000	202140000	188770000	164740000	179520000	162670000	146980000	164930000	131430000	192050000	194330000	187870000	212420000	208170000	234170000	165230000	202970000	235460000	199670000	235630000	213090000	198580000	170920000	175880000	183100000	152800000	183070000	186860000	181840000	155980000	168820000	140590000	169710000	193510000	138320000	162510000	168880000	200630000	167030000	157830000	153000000	237480000	195890000	165360000	202690000	163150000	223090000
989240000	881510016	856419968	957180032	817670016	834209984	931489984	989750016	729020032	716489984	1029800000	1012700032	933040000	787430016	887619968	1060400000	909889984	738259968	982000000	900489984	768400000	800739968	908780032	943580032	790960000	755539968	761590016	743900032	772520000	781400000	844419968	943660032	993539968	838780032	905369984	975329984	863129984	838369984	954019968	1164700032	907110016	914720000	846790016	1029900032	813299968	858110016	988630016	1327900032	896480000	787480000
3888200	7845100	2977000	5834800	5112300	3669900	4723600	4920500	5514700	4457600	3923100	5606000	3742200	4182200	5278300	5712800	2931300	3693500	8130900	9106400	3311700	0	5110600	5272800	3502700	4439200	5030300	7619900	3438200	7620900	5375700	7637200	6350400	2575000	5733200	6377200	3376200	8706900	5153100	9338200	6264200	3644900	5706500	5645900	7419500	3475900	4772700	5055300	1973800	1882400
95125000	108020000	97724000	104950000	90468000	93175000	96582000	91167000	104400000	115640000	101140000	76236000	101890000	95934000	105030000	89016000	106180000	113890000	120450000	104600000	106770000	114010000	88913000	87381000	99785000	110750000	95280000	111440000	97495000	123580000	75737000	90376000	134280000	125870000	105840000	94771000	98699000	114480000	91130000	86015000	110570000	157080000	100150000	97709000	89553000	103420000	108880000	80857000	141550000	138530000
5644000	4653900	2162800	0	5090100	5458400	0	3469600	2845700	0	2445100	0	0	2418300	0	7424700	4938000	2327100	0	0	5487000	2225800	3699900	3086100	3028400	0	2839600	6363200	2090500	2046900	2533200	0	3411300	2822600	0	0	2832400	4909600	3463300	0	2418500	3533400	0	4552900	0	2128200	2753400	0	3417900	7664600
19489000	29753000	26468000	20578000	26651000	23831000	27903000	25444000	30203000	26886000	32026000	32514000	34608000	29099000	39433000	34938000	31967000	35056000	39384000	27687000	33926000	32157000	29104000	33124000	24094000	34588000	28991000	26660000	24926000	27476000	23974000	33782000	39958000	30494000	30155000	33518000	0	29634000	36483000	29424000	24889000	39209000	35450000	21316000	28053000	33949000	33192000	30115000	40461000	49100000
0	0	0	0	0	0	0	0	0	0	0	0	0	0	0	0	0	0	0	0	0	0	0	0	0	0	0	0	0	0	0	0	0	0	0	0	0	0	0	0	0	0	0	0	0	0	0	0	0	0
323520000	243540000	230450000	242820000	251310000	208120000	263930000	162170000	282060000	355209984	208540000	239700000	283520000	276080000	233650000	304889984	295329984	187530000	141200000	206320000	288280000	245910000	287820000	243890000	232890000	250550000	224950000	224200000	216180000	256740000	209660000	162010000	336120000	265000000	282689984	194000000	362400000	264960000	256100000	287760000	310830016	336310016	263600000	249230000	284540000	187340000	180230000	206470000	228130000	289520000
3411400	6264200	7184300	4093400	0	0	0	0	0	0	0	0	0	0	0	0	0	0	0	0	0	0	0	0	0	0	0	0	0	0	0	0	0	0	0	0	0	0	0	0	0	0	0	0	0	0	0	0	0	0
2678100	5381800	3136200	7134400	3434600	4166000	0	5337100	3859800	4091500	6407400	3706600	6127400	3237000	14129000	8005200	3195700	4480000	8032900	5639700	2966200	1763000	3073600	4941300	2880400	3767300	3735500	5503300	6457700	5222700	8424100	6771800	3624500	3348200	5838700	7375100	4365000	5738300	8144000	5987700	8745700	3172100	2596900	15435000	3797600	3432800	7732600	5989100	0	10666000
146040000	181530000	225020000	216660000	458760000	539809984	395000000	518849984	89034000	83401000	83461000	93042000	115690000	165680000	146530000	145160000	52427000	78330000	72972000	74620000	74933000	76465000	90408000	68741000	57225000	62998000	53277000	57930000	82330000	136920000	116690000	149850000	431489984	333880000	347729984	479420000	260190000	214710000	186020000	227610000	66350000	87948000	116650000	115870000	65035000	56004000	82389000	115190000	268750016	393440000
5074900	7310100	9397300	10004000	7252400	7799300	10567000	11373000	6006000	8351300	10593000	9261300	6081300	8528100	11117000	10281000	4458800	7972200	11955000	9037400	5510500	7979700	9207100	11380000	5905300	9121700	8992100	9816800	5218300	10765000	9060900	11385000	5281900	6719700	9299500	12717000	8886400	6552800	9005400	14063000	5763700	6455100	8785800	15561000	5648200	8649100	9357300	14814000	5018300	5299200
228970000	197060000	204540000	241320000	188700000	192370000	211200000	201440000	205810000	215310000	242330000	231820000	215640000	203080000	198150000	231400000	211260000	242640000	258770000	232520000	219550000	244010000	209310000	264440000	229690000	211570000	268689984	237720000	302369984	248180000	285320000	251810000	224610000	234380000	206740000	231400000	172380000	249820000	189390000	218790000	187630000	190270000	189410000	165970000	175840000	188780000	187580000	188230000	391070016	153660000
18213000	0	21105000	28004000	7640900	30287000	28908000	16177000	47562000	30286000	31729000	33798000	26555000	22266000	22229000	39465000	32425000	27326000	47181000	39870000	24309000	47048000	46979000	30136000	13981000	28684000	30914000	23082000	31598000	19488000	36338000	32711000	34073000	14716000	12842000	23012000	24410000	19158000	16619000	37735000	16617000	14548000	22103000	26960000	31919000	26946000	18020000	29872000	13136000	7424400
10499000	0	0	0	0	0	0	0	0	0	0	0	12628000	0	0	0	7786600	0	0	0	0	8059700	0	0	8482500	0	0	1348800	3678000	0	0	6468500	9454800	0	0	5722500	0	0	0	0	0	0	0	0	0	8806000	0	0	0	0
98915000	81315000	85183000	76920000	103300000	86738000	78051000	67121000	70361000	78562000	84561000	72209000	108930000	96942000	79733000	62252000	105870000	85952000	88959000	86607000	98255000	91065000	79930000	74143000	84292000	51594000	60928000	74961000	75847000	70788000	67790000	80073000	71091000	91247000	86001000	100890000	79932000	114630000	82861000	76235000	87588000	91534000	85646000	82232000	86330000	85473000	97209000	120350000	58884000	94230000
0	17185000	17052000	14464000	14545000	15907000	13130000	16492000	19803000	21028000	0	0	16047000	8186600	20195000	15830000	18834000	9319300	13432000	20339000	16611000	15152000	15670000	21137000	19272000	16453000	19406000	15714000	16375000	13881000	17887000	22868000	27436000	21302000	25549000	20759000	0	19605000	18309000	37031000	24845000	24575000	36647000	23911000	14045000	14880000	10242000	17778000	69342000	50248000
236780000	311529984	304550016	263090000	284169984	363520000	352800000	306020000	325430016	381630016	348790016	216430000	345340000	393329984	312100000	279780000	283860000	324849984	277800000	343769984	267610000	361780000	470070016	356400000	227300000	275180000	321230016	258820000	418929984	305910016	288080000	333760000	213120000	264970000	264290000	293660000	308260000	370950016	291780000	288950016	199940000	268860000	187150000	302209984	276880000	465320000	380360000	327480000	174080000	172340000
81544000	108090000	87167000	98501000	123340000	99268000	80546000	88029000	124130000	102310000	109640000	126980000	99987000	109250000	116770000	131110000	139810000	118330000	112280000	117720000	100650000	131680000	98704000	119070000	90349000	120910000	94061000	114220000	90974000	104190000	96399000	97858000	80528000	78152000	108050000	165570000	84004000	100160000	86434000	107590000	153660000	73247000	100260000	97631000	108340000	128950000	95627000	105560000	99385000	56509000
605360	574320	433010	420570	628940	422410	644120	338940	303500	346590	352380	323330	470360	563020	416970	382790	411480	570540	549580	428090	386430	423350	397010	347850	431920	512550	418680	446450	365190	402630	324580	348160	392250	426970	539550	463370	612980	496100	476570	0	453640	462430	498160	0	468900	569950	382550	0	381520	259980
68422000	117940000	118320000	114430000	69151000	82921000	112830000	66909000	67739000	70708000	106760000	125890000	73050000	80688000	134550000	94262000	88871000	87216000	108020000	74059000	75831000	95828000	91563000	83218000	105690000	85103000	104290000	101360000	71132000	89355000	85900000	104390000	109750000	59355000	111150000	107050000	96968000	66135000	119150000	83427000	79507000	58801000	103180000	72986000	101050000	103830000	104080000	176530000	93511000	95873000
1407900032	1623100032	1752600064	1534400000	1553600000	2015500032	1439299968	1727500032	1845100032	2350700032	2070700032	1869200000	1379900032	1554000000	2137200000	1818200064	1705400064	2121100032	1756400000	1407800064	1530099968	1612600064	1501400064	2282299904	1738300032	1301500032	1695699968	1693299968	1455600000	1287100032	1791699968	1565500032	1579800064	1640199936	1565500032	2061200000	1770200064	1651600000	1442800000	1832600064	1938899968	1707399936	1836800000	1964300032	1898800000	1760400000	1697100032	1995100032	1551900032	1878700032
548489984	594889984	538019968	471040000	459550016	528070016	461910016	572070016	421689984	456329984	463460000	458400000	464489984	454240000	426030016	540089984	513160000	466550016	425920000	604200000	552280000	426020000	474940000	471400000	413920000	531420000	438630016	485580000	461640000	500129984	477340000	503150016	439940000	540840000	506310016	485590016	542760000	608230016	456270016	453360000	449740000	555859968	543139968	520520000	489550016	500070016	428409984	544540032	504300000	569600000
13190000	13765000	12463000	14797000	14640000	14736000	14759000	15217000	19515000	20917000	12328000	14565000	13844000	14639000	12021000	14214000	14628000	13112000	11497000	13485000	17197000	21659000	12943000	14269000	15148000	14432000	13390000	14565000	20213000	17348000	17796000	9986000	13521000	12858000	15995000	10951000	14796000	11191000	12834000	13257000	14713000	12904000	9779100	8433400	17040000	17435000	15018000	12297000	14422000	16584000
14055000	15198000	17825000	24724000	15134000	12460000	15997000	13292000	17200000	21274000	15186000	12184000	12234000	19391000	13364000	16759000	15415000	13151000	12946000	19758000	30959000	17044000	17945000	13863000	17920000	16568000	19499000	17722000	18324000	27239000	17715000	18949000	14017000	25018000	15168000	14155000	14218000	19772000	18618000	12518000	10761000	21865000	20551000	19258000	10519000	20017000	17891000	16983000	18148000	15627000
1085700	1529800	1179400	0	942570	933140	1228200	0	3119800	1224700	2150100	1917600	970990	1285500	1961300	0	0	981760	1774000	1162600	1020800	1097200	1482400	2135200	962470	1122900	1319700	125310	1131800	1368700	0	1753600	0	2128700	1341500	1502600	1222900	1178400	1170800	0	2883400	1137300	669300	0	2676000	1413900	1107100	0	737900	0
1034100	0	0	0	0	0	0	0	0	0	0	0	0	0	0	0	0	0	0	0	0	0	0	0	0	0	0	0	0	0	0	1117000	3333100	0	0	0	0	2901900	0	0	1080200	2992400	0	0	0	1803000	0	0	2320400	1057300
16497000	16127000	20571000	16648000	18744000	19771000	12444000	11721000	28445000	24511000	12538000	27905000	26792000	29287000	18155000	17922000	22047000	31187000	20551000	19186000	23866000	22419000	22475000	16387000	20611000	22531000	19040000	16029000	22945000	13824000	7953800	12513000	0	21293000	20421000	14924000	15643000	19999000	18320000	10492000	20564000	16867000	12256000	20275000	12259000	10526000	0	0	18843000	16470000
17210000	27134000	20848000	22025000	21353000	33252000	20819000	22202000	27833000	15173000	19134000	23851000	21961000	22286000	22022000	26843000	40639000	29636000	35646000	19930000	19977000	22569000	26151000	24200000	23398000	17235000	24265000	23578000	23177000	23800000	26353000	18097000	21195000	23508000	16758000	17426000	28448000	21758000	20711000	16455000	31527000	31766000	21240000	31632000	22777000	32818000	21433000	14219000	29859000	25048000
502880000	525860000	748150016	698710016	602940032	387750016	448140000	440230016	437369984	428590016	395620000	448609984	519529984	488060000	481350016	359260000	510470016	579760000	517270016	349350016	466489984	482489984	482670016	411560000	423849984	473350016	663729984	516609984	496360000	566449984	706819968	481820000	594460032	541969984	453769984	430969984	430260000	458240000	385540000	412990016	673340032	523940000	541609984	466049984	499780000	476510016	456400000	479860000	463390016	468089984
2998600	3773000	0	3168600	1727900	0	0	0	3831300	0	0	2920100	0	0	3953000	0	4528800	5366600	5532700	2595900	0	0	0	0	0	0	0	4542100	0	0	0	0	2951100	1851400	0	2991100	0	0	0	0	0	0	0	2890100	0	0	0	0	3186300	6178000
754110016	735500032	833470016	845120000	789400000	761950016	950150016	911169984	857190016	805200000	1057600000	1042800000	742409984	903409984	967230016	1041200000	806440000	832230016	787990016	826390016	786899968	988620032	1015699968	1204800000	799360000	821260032	921470016	887020032	734689984	928560000	858220032	783070016	619820032	843980032	750120000	984849984	634870016	822579968	780419968	760440000	749520000	794380032	696540032	991030016	851590016	892409984	1049200000	1029600000	625089984	840070016
4280300	4666000	8701200	8115600	0	0	0	0	0	0	0	0	0	0	0	0	0	0	0	0	0	0	0	0	0	0	0	0	0	0	0	0	0	0	0	0	0	0	3294400	0	0	0	0	0	0	0	0	0	0	0
49264000	57858000	43675000	55791000	34456000	51214000	48243000	46451000	60536000	53240000	38566000	30010000	42302000	43370000	63788000	43220000	36887000	48625000	54456000	52120000	49976000	44382000	42416000	69502000	51300000	37197000	48603000	64773000	43109000	32557000	53111000	45588000	53750000	55116000	53842000	49523000	29201000	54136000	48329000	21210000	54882000	43728000	57409000	23775000	71037000	52054000	47781000	45039000	85192000	52786000
58477000	61231000	65950000	74811000	72479000	60914000	78606000	61480000	118140000	97564000	94361000	122710000	132930000	66587000	62253000	58685000	75923000	95350000	45139000	49304000	91561000	124790000	109320000	107230000	68729000	94123000	105210000	81830000	95764000	70627000	75553000	85350000	103520000	83132000	107070000	80346000	67368000	69267000	89340000	98691000	117640000	71280000	93901000	88856000	113320000	87407000	105590000	105420000	104360000	48470000
56309000	48457000	59845000	45201000	68061000	68780000	31855000	61995000	61678000	52543000	56759000	69640000	59447000	34867000	62112000	51496000	81976000	60356000	57019000	45322000	65239000	71751000	59647000	71376000	63380000	76938000	51884000	53532000	55250000	53092000	41456000	65335000	76149000	61346000	50378000	39588000	88420000	41362000	90313000	61922000	60981000	64104000	58059000	61208000	70061000	50780000	83294000	37364000	86025000	59822000
0	0	0	3542300	6088300	7319500	4331000	3887100	0	0	0	0	8100000	0	3629000	3359500	7638900	0	0	3397700	3396300	4283900	4156800	0	0	0	3914200	3320500	10465000	0	4937100	0	0	0	2380000	2675800	5566000	0	0	4234000	0	0	3474200	0	0	0	0	0	6248900	5327100
168330000	186850000	127440000	155300000	188210000	205820000	130690000	153840000	89017000	154800000	193820000	234050000	78033000	206840000	169880000	160850000	89216000	212800000	287849984	170310000	89546000	205930000	134370000	205000000	224100000	230090000	101520000	208370000	35494000	250250000	159830000	211090000	107100000	257910000	179720000	234440000	301880000	252940000	205640000	238290000	57687000	51925000	139440000	256410000	192300000	37874000	182000000	274680000	211270000	99401000
43993000	41620000	44281000	45524000	33190000	32327000	42560000	41549000	40040000	54104000	36313000	58181000	33720000	67562000	35150000	47062000	39599000	36425000	48661000	56142000	35522000	32337000	44658000	42441000	41973000	55489000	46196000	57746000	36689000	59410000	52487000	50849000	31360000	36258000	34663000	40258000	33767000	26751000	35234000	34543000	38448000	39314000	45939000	49562000	39854000	42567000	44686000	36526000	25064000	40053000
9729200	11010000	6015600	10956000	7816200	8886700	7355800	4163800	6364800	7450300	0	993590	11010000	4400500	6402300	5210800	8617900	5898900	3695000	0	8366700	2373700	6849100	6823900	9403900	0	7662000	9094500	7961300	6350100	10655000	4482700	6326700	7707500	10238000	0	8804500	5532800	5549800	0	16300000	5684100	7418700	3437100	4192200	8735300	3738100	12816000	13210000	5339600
139730000	132700000	120100000	130220000	115890000	110330000	99853000	117480000	146690000	93043000	181460000	70776000	74494000	138600000	112180000	152090000	127040000	137700000	159370000	103390000	112040000	154510000	162090000	62783000	122000000	112540000	168930000	141590000	127600000	143670000	107890000	130890000	132000000	107620000	130780000	94055000	184520000	146990000	107780000	135800000	118170000	101290000	122540000	112910000	114090000	164390000	181710000	151110000	199340000	147770000
633660032	548780032	544590016	603900032	560640000	474249984	565670016	510860000	509780000	500089984	575009984	531620000	609400000	545950016	534820000	462350016	534950016	507160000	517390016	438480000	496240000	447969984	564310016	479740000	527990016	521340000	500910016	463500000	389630016	550409984	550460032	554339968	658000000	497030016	548169984	567560000	660819968	494540000	612630016	583270016	592409984	563129984	607689984	438900000	664489984	580809984	614760000	498500000	718049984	479080000
596249984	558529984	507230016	478320000	442750016	341040000	516960000	654280000	422240000	586110016	568040000	342740000	622000000	554700032	589520000	506600000	480540000	722910016	462920000	569500032	609059968	646120000	580979968	368540000	502980000	714640000	608569984	580350016	598560000	717260032	483180000	451270016	408860000	504360000	469790016	402910016	482880000	443400000	549939968	518449984	591740032	878310016	541160000	480360000	514300000	593459968	510400000	500940000	595969984	463270016
273169984	303220000	305940000	253500000	288110016	325630016	242000000	251310000	227840000	248210000	266700000	244800000	240830000	240700000	312420000	232560000	267150000	234170000	291800000	249310000	332820000	263860000	234460000	321630016	244560000	281040000	278940000	242880000	237590000	259260000	225110000	231790000	339129984	253510000	230230000	209580000	268800000	249590000	268840000	234220000	264320000	256890000	236820000	266090000	272550016	289660000	273400000	288870016	240510000	288310016
7257200	10476000	7884200	11991000	11569000	13405000	9856200	15013000	5401200	6846600	0	10159000	16304000	8282600	10451000	11589000	61462000	11518000	8789900	11793000	8931800	11389000	10649000	9299000	8662400	8555300	11325000	14374000	9095300	11617000	14967000	12957000	6867200	10648000	12457000	12534000	7752300	15490000	9386600	8456500	5085700	9943400	7586400	14746000	7451000	10617000	7195300	11059000	5017900	7985600
662019968	341320000	546550016	445600000	458110016	705480000	492590016	513910016	247610000	388200000	395320000	343369984	632809984	192880000	522590016	739400000	1058400000	630449984	418609984	539219968	578889984	728689984	320769984	584750016	680680000	537219968	429209984	723809984	758560000	321769984	748870016	771059968	1056400000	643609984	512710016	604750016	757030016	1088300032	619139968	664120000	497630016	522569984	467329984	630339968	739320000	397489984	587320000	457460000	926630016	1023200000
0	0	0	0	0	0	0	0	0	0	0	0	0	0	0	0	0	0	0	0	0	0	0	0	0	0	0	0	0	674590	0	0	0	0	0	0	0	0	0	0	0	0	0	0	0	0	0	0	0	0
10270000	12860000	11943000	16647000	12652000	12410000	12383000	12689000	16443000	17282000	19535000	22546000	14056000	11500000	23282000	23971000	15864000	23714000	14415000	24411000	16556000	13996000	18480000	16739000	13763000	10790000	15270000	15366000	15133000	11305000	11728000	12558000	16042000	16649000	15147000	15528000	14628000	13675000	10824000	15826000	13223000	14794000	20346000	19728000	17216000	26778000	18592000	16112000	13191000	11802000
82236000	89007000	114120000	99359000	0	0	0	0	106040000	194190000	168500000	23944000	3627900	0	0	0	273180000	191220000	257600000	49068000	4252400	0	0	0	142550000	85609000	14054000	92603000	4646400	0	0	0	19099000	0	0	0	0	3746300	0	0	48714000	28269000	9495700	6552900	0	0	0	0	36534000	41191000
0	0	0	0	0	0	0	0	0	0	0	0	3765800	0	0	0	0	0	0	0	5860600	0	0	0	0	0	0	0	0	0	0	263190000	26361000	0	0	0	12278000	0	0	0	0	0	0	0	2351400	0	0	0	32555000	0
5312300	6984300	1113800	0	5172700	5179500	5734800	0	5125500	0	3006000	0	3809200	11086000	0	0	5276200	0	0	0	5441100	7861800	5243800	0	4859100	0	0	0	6006600	9804700	4432400	8056700	4390700	0	3159900	0	4045400	6324800	3794100	0	6429300	6384600	3419700	0	4578500	0	2925000	5081300	0	0
0	0	0	0	0	0	0	0	0	0	0	0	0	0	0	0	0	0	0	0	0	7419300	0	0	0	0	0	0	0	0	0	0	0	0	0	0	0	0	0	0	0	0	0	0	0	0	0	0	0	0
95973000	102080000	105500000	124070000	56892000	101870000	80372000	66951000	70120000	68415000	78590000	48201000	70059000	94431000	80063000	63692000	59667000	115880000	42519000	62868000	71483000	78081000	74668000	72913000	86398000	85505000	112550000	74500000	148660000	109060000	68479000	73102000	87052000	91823000	70471000	60755000	90197000	108940000	65622000	71342000	153790000	104350000	84663000	77355000	141940000	78125000	96601000	66502000	101360000	118360000
38200000	41614000	43371000	31756000	40491000	51010000	42242000	43559000	48193000	44901000	66056000	43746000	51007000	49528000	44721000	47488000	46870000	56028000	52878000	45578000	42449000	39472000	37018000	58888000	43471000	49856000	43234000	37434000	30695000	39236000	46831000	43131000	49102000	48691000	64050000	64069000	42841000	40281000	42202000	45370000	42477000	51797000	51500000	50625000	33626000	44661000	51985000	62293000	58691000	37297000
159010000	186120000	169340000	164130000	161480000	147800000	152570000	147770000	107300000	118460000	120270000	131560000	150360000	161170000	163470000	154340000	156790000	141500000	205140000	161620000	127680000	135300000	124310000	116810000	169220000	163090000	137240000	178780000	196210000	177130000	139230000	167720000	129210000	189620000	145410000	127860000	139770000	152470000	129670000	115450000	164760000	171090000	139770000	156730000	157000000	172910000	174580000	145080000	164140000	159350000
9127400	8455800	11421000	13144000	10594000	12717000	14626000	9979500	10321000	19400000	4610800	7148500	9002400	14039000	8544500	6386500	8261000	14515000	6517800	11047000	13178000	7063800	21344000	10595000	14780000	14185000	0	11892000	13098000	8170900	7369200	11716000	9114300	11132000	14877000	9161000	10693000	11869000	19006000	9018600	10489000	12134000	13560000	9982800	9293900	14574000	24585000	12964000	10958000	12481000
5325600	8825100	3925400	4481000	8243700	7583100	4498900	0	4195600	5031400	0	5994700	9765500	6505200	4225800	0	6844000	6846700	0	0	7556500	7633300	0	4240700	4178700	4350800	0	0	9099200	4035600	400310	3176000	5321900	3360500	0	0	9518900	6306200	5433400	4452800	4042400	9720700	0	0	3762800	13358000	7362200	0	4192800	10103000
10414000	5352800	5169200	4456100	4689900	3918800	2831800	0	7860200	4374500	0	0	6189200	3281400	0	0	5502700	0	0	0	8358000	4858800	3003200	0	6151600	9433500	4769300	1589200	8839500	3811000	7415600	0	15951000	6780800	10671000	3499100	0	0	5252500	0	12443000	8067900	5784500	0	8709700	10951000	0	0	9562600	6399700
355460000	414889984	359260000	373289984	363609984	374470016	464750016	352980000	386620000	376960000	313260000	388020000	385649984	354510016	449889984	387630016	421430016	462040000	437240000	377880000	354049984	377630016	460260000	333200000	352009984	310320000	455649984	395140000	464520000	351830016	391049984	376729984	391870016	364990016	328180000	459000000	334809984	341329984	335140000	330889984	408540000	376820000	396169984	395649984	342260000	324680000	381350016	306590016	419350016	410160000
8185800	12190000	7681100	0	7833500	10348000	8673200	8788300	9788800	10724000	14235000	8800200	15180000	9922800	8639800	6446100	9569600	8627500	16358000	10892000	10194000	11260000	16534000	17111000	9728600	10257000	0	11269000	15376000	14446000	16873000	12524000	18232000	10676000	9435400	15544000	22592000	10965000	11753000	12003000	18589000	7880400	10539000	11833000	13201000	21431000	14479000	11018000	14744000	8388900
5381800	6474500	8629100	4234400	6108100	5585800	5380700	6091500	4839300	9190000	6613900	0	5965200	7577100	5533600	5270600	7642200	0	0	2858200	10271000	5140900	9163400	6685500	5106800	5476900	2202900	4627600	7363400	3237400	0	3596800	2730700	8008000	0	0	4537200	5181400	0	0	4502900	5819100	0	0	10018000	0	0	9228800	0	0
132490000	153670000	140500000	176890000	124570000	132220000	116710000	129620000	135680000	158500000	192710000	175220000	148460000	136710000	160100000	127860000	194670000	144680000	150140000	145770000	150620000	168460000	166410000	142120000	173000000	162800000	153500000	150890000	153570000	150940000	134230000	161160000	147800000	172670000	186940000	138900000	137380000	153750000	170390000	128260000	146830000	185890000	201280000	196180000	140720000	152410000	143570000	159020000	238270000	235800000
148140000	167650000	180760000	169980000	176620000	178190000	193810000	157710000	168460000	158650000	148590000	168620000	217620000	154660000	189420000	160140000	180260000	205140000	154780000	173080000	229180000	140500000	182000000	170770000	154830000	161660000	173010000	172820000	203620000	165760000	152540000	171710000	204600000	208610000	193340000	239430000	208700000	249390000	224140000	178810000	213710000	195510000	206950000	175870000	192280000	171830000	229640000	202990000	292120000	248270000
147000000	134730000	149520000	172860000	121310000	126080000	149440000	198170000	179810000	152200000	148810000	201020000	116200000	110660000	143640000	163170000	169770000	145580000	196340000	163590000	139100000	159350000	175300000	152960000	205220000	145240000	179680000	189960000	165690000	164420000	165050000	135100000	153520000	132380000	192670000	208850000	156770000	152910000	156340000	177430000	144130000	121860000	136930000	191110000	166700000	168550000	180710000	209620000	95529000	81738000
408140000	331060000	446070016	459280000	360310016	367880000	347670016	423529984	592499968	445560000	518529984	475409984	419129984	430080000	363449984	452670016	315820000	380980000	500740000	491920000	304900000	379550016	437600000	505390016	367809984	423129984	438680000	433369984	356320000	524260000	443569984	457480000	342920000	411220000	364680000	523380000	392089984	391880000	314140000	468840000	375420000	336140000	338190016	573070016	326400000	325820000	399270016	578099968	371510016	354470016
0	0	0	0	0	0	0	0	0	0	0	0	0	0	0	0	0	551370	0	0	0	0	0	0	0	0	0	0	694040	0	0	0	0	1868600	0	0	0	754050	0	0	0	0	0	0	0	0	0	0	0	0
0	0	0	0	0	0	0	0	0	0	0	0	0	0	0	0	0	0	0	0	0	0	0	0	0	0	0	0	0	0	0	0	0	0	0	0	0	0	0	0	0	0	0	0	0	0	0	0	0	0
0	0	0	0	0	0	0	0	0	400890	0	0	1255500	0	0	0	1842500	0	0	0	726760	0	0	0	472880	0	0	0	616300	0	0	0	1303300	999600	0	0	0	0	0	0	596370	0	0	0	0	0	0	0	903810	0
41601000	39700000	35007000	55933000	0	34990000	54950000	32381000	23959000	29063000	39235000	70073000	0	0	54360000	63269000	0	95575000	71490000	62811000	43636000	0	43240000	64940000	49271000	32708000	39808000	87565000	41981000	92646000	41025000	58204000	44808000	41348000	44221000	46323000	89835000	46882000	48020000	108330000	56864000	65442000	58096000	99487000	0	41512000	33910000	85714000	0	17471000
0	0	0	0	335700	0	0	0	0	0	0	445970	0	0	0	579430	0	0	0	0	0	0	623430	0	0	0	0	386430	361630	0	0	697510	0	0	0	0	0	0	0	0	0	0	0	0	0	0	0	0	0	0
0	0	0	0	0	0	0	0	0	0	0	0	0	0	0	0	0	0	0	0	0	0	0	0	0	0	0	0	0	0	0	0	0	0	0	0	0	0	0	0	0	0	0	0	0	0	0	0	0	4251000
59178000	61167000	64362000	63221000	54181000	77541000	88480000	74790000	85816000	81270000	85793000	99695000	96860000	70679000	71456000	98018000	92936000	78768000	68826000	120490000	96731000	81535000	97102000	115250000	61339000	75160000	70218000	62478000	59174000	62675000	57330000	67612000	91646000	85022000	61236000	85845000	84410000	73454000	80769000	41785000	64728000	68754000	56441000	60475000	70035000	65390000	54944000	57606000	84393000	76688000
357720000	385590016	291049984	333249984	337840000	345390016	321180000	290070016	266070000	291740000	294089984	258250000	295329984	359580000	317030016	308729984	356750016	390300000	368470016	352440000	291220000	310350016	327830016	307420000	350720000	307070016	327180000	322360000	303270016	297889984	240290000	267000000	365510016	329809984	359980000	304369984	285540000	282209984	275120000	232290000	352500000	369769984	380169984	319980000	309840000	330110016	295710016	276310016	557129984	583470016
208990000	192460000	163470000	188540000	174630000	156720000	186520000	175630000	181170000	172330000	203110000	168290000	229770000	194290000	213410000	180660000	224900000	180080000	171000000	185660000	204470000	205940000	196780000	190140000	241340000	232290000	213940000	212560000	217280000	184180000	187000000	181990000	223360000	189920000	190640000	182620000	251470000	180840000	212960000	167280000	227260000	185000000	200510000	175500000	235630000	203800000	204140000	209240000	248220000	196630000
71691000	85659000	63812000	86155000	67398000	80622000	78133000	60960000	99942000	81779000	84414000	65635000	67485000	74295000	80234000	74841000	87172000	85314000	96178000	84084000	83484000	73366000	72233000	76226000	79232000	67546000	80473000	80917000	85855000	53719000	69532000	63069000	90176000	104260000	82806000	99623000	79101000	79442000	74191000	73830000	67597000	90778000	89805000	70259000	67252000	77343000	81054000	69393000	117990000	80338000
34712000	32516000	36737000	33739000	47229000	40563000	86366000	53685000	35231000	60517000	69487000	33473000	71266000	31207000	46385000	59836000	40465000	59639000	50220000	58601000	46303000	1138000	56756000	59481000	28076000	23294000	48312000	46022000	38380000	56916000	29229000	53154000	51764000	33077000	33528000	46147000	36445000	60610000	15820000	53852000	30149000	28423000	34097000	57427000	34804000	36467000	34762000	8718900	29628000	37717000
68700000	23885000	21530000	20319000	25650000	25366000	26766000	31451000	19907000	11375000	36548000	30233000	30092000	18016000	27961000	25743000	15669000	30456000	24055000	25520000	32624000	30261000	27772000	27642000	23724000	27055000	20317000	24130000	32349000	30648000	23525000	20754000	13103000	25750000	16033000	29965000	19391000	20041000	25671000	23733000	20019000	24293000	14954000	23957000	96180000	28514000	35741000	17602000	23586000	33683000
18291000	19978000	21778000	21162000	18449000	31310000	28986000	30732000	26728000	20750000	4655300	29231000	20198000	16625000	29920000	20454000	21350000	17563000	28115000	25835000	18575000	21571000	23114000	19204000	25730000	23667000	36486000	26807000	15802000	24735000	24194000	28941000	22828000	18878000	24944000	36853000	31386000	26140000	22063000	39216000	22501000	28052000	18070000	84818000	40426000	14143000	38337000	35254000	32653000	16980000
43614000	53529000	46073000	0	63724000	57834000	0	45311000	65269000	61574000	65063000	56435000	65846000	43263000	7819200	50375000	57987000	64781000	69334000	60244000	60010000	70262000	0	41053000	66902000	55029000	0	1373300	59602000	17127000	42256000	37345000	50998000	53908000	62419000	23420000	44827000	29171000	45662000	44551000	69228000	58303000	52458000	51746000	34473000	41235000	66275000	52201000	43014000	79127000
7163600	3960700	11184000	1817100	0	9307800	6481300	0	10581000	4070000	16195000	4552000	7474900	5770400	4935700	2330000	5373800	9468900	6754100	2887100	12048000	10057000	7731100	6591800	9789600	9583000	6638100	5677600	12822000	15346000	7303300	6391900	2678600	0	6653900	0	3499500	0	12124000	4905800	45501000	7476600	4649400	3629500	11464000	7053200	5934200	4414600	9121500	9198900
48984000	39084000	34627000	26909000	42405000	38755000	25561000	32630000	44032000	31642000	31370000	35805000	27326000	49646000	48329000	33267000	48680000	36168000	32634000	38405000	46997000	53386000	34824000	39591000	46721000	55356000	38925000	37437000	47731000	23429000	37281000	30600000	41596000	59657000	34506000	30517000	50852000	48109000	33691000	10284000	51649000	48869000	32088000	33538000	39726000	40106000	33251000	30595000	66627000	62471000
9992600	18589000	13973000	23907000	14968000	18737000	17540000	12137000	14162000	16296000	17937000	7501400	15697000	14127000	7204500	13082000	12962000	9427000	17093000	5875600	11619000	8621000	15105000	11011000	13168000	13830000	11517000	10412000	11209000	20282000	17969000	14552000	8513600	19069000	9221500	12715000	12159000	15566000	11808000	13186000	15248000	20300000	26973000	9019200	8811500	13668000	14368000	12229000	12020000	22017000
103410000	128110000	110380000	101810000	120000000	95728000	79384000	114490000	131170000	126450000	110640000	112120000	157120000	105690000	119870000	119120000	141550000	158790000	143820000	131530000	119940000	84579000	126750000	120130000	142190000	122580000	114700000	119840000	152680000	99252000	106700000	114120000	95039000	109680000	91886000	109700000	91066000	116380000	141240000	85471000	101120000	99036000	107150000	85404000	103290000	117210000	97434000	114330000	112370000	117250000
1984900	0	1965900	0	3856900	1888500	3241700	4513900	3565900	3146200	0	2602000	4053500	3239000	5091300	3938100	1793500	0	0	2397400	4631700	4120600	4289800	3910300	3078200	3723200	3817900	2562500	4119400	0	3206400	4943800	4814800	3963400	2784000	1672500	4339100	3809800	5579200	3961200	2623000	0	3185800	0	6983000	5374900	2247600	4526400	0	3899700
98447000	87741000	90776000	108320000	100540000	102130000	109400000	116390000	113230000	113090000	101040000	108060000	103310000	99988000	79697000	124520000	111010000	124510000	134710000	102160000	106860000	117520000	105890000	116270000	91670000	112910000	92457000	111980000	121340000	92908000	108380000	105340000	93116000	94315000	112760000	82753000	93680000	118390000	90954000	93677000	114770000	96452000	90680000	142400000	143080000	86564000	82000000	87146000	136470000	100600000
0	8503600	5885800	4909100	0	2872500	6273600	2908300	0	3433900	0	3803800	0	3384100	3649500	4088100	0	9031100	4771500	3580300	0	5941600	3755500	3420400	0	5177700	3880300	3640100	0	7798700	2650800	3052900	0	0	5466700	2245300	11384000	6459300	3376200	3102200	0	0	2973200	3586900	0	2565100	3452200	2280000	3628700	0
228230000	236100000	188550000	203800000	180350000	213380000	208410000	217530000	265600000	208260000	244530000	191350000	207860000	202100000	175680000	208460000	191740000	250620000	181850000	214080000	219080000	241280000	229360000	222240000	212250000	273000000	278520000	245030000	186090000	256470000	216530000	214250000	233800000	239660000	202870000	158300000	193450000	191370000	191210000	176040000	191210000	228100000	224890000	214930000	205370000	248030000	256250000	256410000	271470016	217590000
1747600	1957100	2152400	1777400	1626100	1423600	2065400	1326100	1584400	1614900	1955600	1603000	1155500	1733500	0	1902800	1358600	1687000	2488200	1519900	1604900	1354300	1771300	1852200	1756700	3042900	2373200	1775700	1270700	2116700	2024600	2848500	1793500	1683600	0	2334600	2537700	1801200	1773000	2483400	1665000	1451400	2023400	3155100	1799200	1903200	1909500	2810600	1393700	1026100
229960000	264740000	314680000	284129984	280040000	231440000	249890000	310120000	229760000	230940000	251940000	278600000	227040000	266700000	302310016	320380000	315110016	230650000	227450000	276209984	276649984	221010000	288550016	283460000	256380000	204820000	335100000	254980000	274240000	259110000	264980000	225380000	211850000	247690000	227500000	187150000	263290000	261250000	232090000	251480000	222670000	229440000	284630016	209320000	280649984	207160000	285200000	252580000	158530000	180210000
8166200	6706300	7594200	7782900	8118500	6490800	8490200	6217300	7229600	8965600	8492800	6826400	9444500	7380700	6564400	9415800	6377700	9638800	6666900	8410400	7959400	9648500	10087000	8392800	12615000	8527400	5827000	7599200	8125000	11411000	7296400	7273500	9549600	9318700	10747000	7600800	7472000	14223000	8513700	6606600	6954600	7056600	30443000	8295700	13372000	8948700	6959100	10197000	13958000	7048100
329080000	324280000	257660000	228750000	276929984	247970000	240320000	206740000	207640000	244710000	197280000	237160000	204780000	263290000	240260000	214440000	239230000	348420000	278800000	256300000	229370000	278209984	256890000	239850000	211420000	257510000	248500000	293440000	237670000	265990000	243100000	258180000	214330000	244570000	228030000	261910000	235370000	215860000	200250000	193180000	294049984	290910016	252750000	245190000	225230000	275960000	305150016	231790000	307529984	295849984
62878000	44330000	50560000	47753000	55641000	42475000	38172000	27780000	49328000	50275000	42767000	31865000	39936000	53117000	56895000	42471000	44837000	58056000	23137000	40908000	66446000	54518000	49893000	46676000	49943000	62537000	57671000	50168000	45596000	56622000	32801000	37235000	64277000	47609000	37742000	34102000	35656000	41105000	36914000	28373000	43530000	53526000	37522000	25745000	53827000	66780000	45665000	38575000	55171000	11958000
530720000	483300000	638200000	656940032	594289984	579080000	680800000	570049984	548910016	604460032	543150016	611100032	500030016	501289984	631609984	564270016	522240000	547630016	532900000	639910016	626849984	494150016	567619968	547480000	478240000	466449984	539480000	543689984	585870016	664339968	578360000	592929984	434689984	572289984	644380032	723200000	397420000	541929984	519400000	586910016	497449984	421760000	572899968	474649984	522240000	445820000	549120000	651379968	431000000	403300000
172440000	215480000	272270016	220590000	222250000	262100000	220490000	185480000	176810000	230120000	193010000	222900000	230910000	172190000	260320000	233000000	287620000	279940000	238010000	215970000	201730000	203670000	237050000	242340000	196500000	278750016	211400000	227210000	190770000	193520000	236830000	223200000	267070000	217710000	211470000	216700000	210790000	189390000	185450000	203600000	198530000	209310000	163510000	251570000	220260000	184570000	195250000	231140000	252350000	189400000
57937000	70907000	65284000	60487000	44098000	49965000	82399000	53274000	50784000	47433000	79533000	70874000	67450000	79765000	74039000	55489000	42526000	61570000	78176000	56250000	37296000	56803000	65783000	65710000	49532000	63546000	67897000	76258000	56335000	64316000	59664000	64961000	69090000	61622000	65365000	82636000	114430000	55207000	59286000	80124000	53783000	66331000	84457000	60327000	63260000	65837000	72297000	68971000	43781000	47683000
14102000	16036000	14811000	17351000	11723000	21315000	13096000	20710000	13522000	15411000	10992000	11965000	17858000	14837000	14960000	28815000	20606000	19536000	11947000	24053000	16754000	17434000	16146000	24212000	14678000	13884000	15318000	16170000	22821000	24570000	16426000	18884000	22223000	16345000	13568000	9177000	15534000	13438000	11124000	18851000	15517000	16562000	13208000	21174000	16568000	18272000	16285000	11388000	16128000	13673000
0	0	0	0	0	0	0	0	0	0	0	0	0	0	0	0	0	0	0	0	0	0	0	0	0	0	0	4266100	0	0	7284200	5062800	0	0	0	0	0	0	0	3330000	0	6898500	0	0	6140500	0	0	0	6557700	0
84647000	101770000	101090000	80876000	86228000	113020000	110160000	105880000	85962000	128870000	102150000	167500000	72990000	133620000	69953000	97878000	103210000	107910000	144010000	118370000	103750000	131960000	107440000	99526000	84837000	97423000	104800000	84107000	103970000	84855000	98815000	101550000	126660000	123830000	134460000	153000000	72795000	107690000	114610000	111370000	42752000	83954000	76465000	98092000	92350000	146830000	127360000	169420000	108420000	82030000
52143000	42038000	60760000	53609000	41747000	48404000	48260000	53821000	55656000	69941000	73543000	50941000	55892000	57887000	55093000	47375000	37198000	41472000	56931000	46669000	55322000	55694000	44489000	48611000	54009000	70233000	62003000	51219000	56171000	45150000	56224000	49763000	40567000	50100000	66544000	63422000	55809000	68762000	58181000	57387000	57280000	54745000	59371000	62392000	59943000	53298000	59404000	38746000	48366000	42812000
5617400	4714700	0	4332100	0	6475900	3425900	0	3059400	0	0	0	9025600	11194000	4560800	0	3425600	4310100	0	0	0	0	4989100	4461300	9008000	0	6583500	0	5155800	0	6573200	4804600	6465100	0	11566000	0	4686500	0	0	0	0	0	9006300	0	6909300	0	4560900	0	9030000	5150100
49541000	39837000	54678000	51339000	37455000	31635000	38911000	38221000	40104000	37737000	36146000	44633000	38888000	54924000	40113000	32556000	43714000	34745000	38627000	44664000	36718000	35083000	35399000	34428000	36850000	33031000	13758000	39450000	31078000	33894000	40404000	35163000	74889000	57386000	73946000	58197000	37965000	42321000	39838000	42520000	40475000	62569000	67244000	43401000	45938000	52746000	34656000	26242000	74081000	75975000
1465100	5358700	9605100	9874700	4075200	7648300	7282900	12603000	3111500	9786900	5427400	4633800	5397500	8587400	8731500	11833000	7430600	8492900	10717000	7914100	6075100	0	5729900	9398000	4928800	7050300	9698800	7997400	8594600	9360200	7774600	9218100	3489600	11560000	6679100	9038300	0	4675700	5562600	10680000	4553600	11114000	6693700	17077000	3616500	10023000	9655900	11582000	5478400	6615000
119760000	128040000	146240000	165060000	113090000	167250000	140980000	158660000	137990000	161840000	175520000	225970000	89594000	114620000	142130000	127890000	101260000	134000000	173530000	153790000	115200000	149040000	118980000	163380000	141500000	126030000	160460000	155090000	137770000	154180000	149410000	149470000	80322000	125830000	139390000	129330000	87586000	95456000	126170000	105260000	105590000	109170000	104250000	140350000	113910000	192270000	106230000	141610000	57633000	67739000
29309000	38397000	28765000	37580000	21478000	41226000	32599000	42487000	44307000	19924000	47898000	74735000	24799000	36797000	35620000	45559000	19949000	35281000	19530000	25987000	22040000	46819000	30499000	41041000	29784000	22328000	29783000	20095000	43110000	44560000	37132000	36829000	23334000	33878000	26018000	26585000	22353000	26942000	30657000	33298000	38680000	24906000	21213000	60649000	32010000	56052000	30141000	42453000	17580000	14748000
319950016	303620000	292160000	275550016	273640000	309009984	288430016	278980000	300380000	284860000	301689984	315729984	258200000	311070016	278980000	258950000	324769984	326980000	297600000	269940000	280420000	264710000	309670016	279480000	313380000	314569984	319580000	305129984	305740000	331140000	300689984	295310016	261150000	287929984	309969984	323840000	275729984	282950016	282289984	259480000	296800000	272020000	361329984	265890000	410129984	363750016	356550016	316260000	313400000	253630000
42050000	37576000	42445000	39524000	55647000	38538000	53509000	37788000	38862000	45634000	41393000	32305000	36524000	40166000	28667000	32151000	25156000	38555000	36164000	36075000	70131000	90632000	40759000	41101000	44644000	33660000	33294000	41004000	57737000	130790000	40975000	54646000	46696000	0	32486000	36679000	55434000	54756000	39573000	48967000	47755000	62053000	34356000	38460000	92183000	42828000	44044000	55049000	101540000	40183000
71924000	129330000	130730000	113770000	50060000	97882000	143470000	85153000	57756000	117510000	92197000	90507000	65304000	96709000	122570000	115250000	63173000	124450000	86662000	75339000	60389000	94344000	120970000	84693000	84456000	97403000	120180000	93416000	130500000	127040000	106750000	123820000	63437000	158850000	62719000	89416000	81356000	140860000	62699000	102630000	79503000	129420000	144830000	111030000	50845000	130340000	101860000	103190000	78020000	127580000
178420000	223940000	211120000	207420000	202860000	197950000	235820000	217160000	209600000	180020000	251040000	179630000	184630000	165430000	160200000	197810000	176660000	203290000	216690000	231780000	207910000	182080000	309600000	249340000	219380000	309880000	279400000	299129984	186200000	192180000	191690000	192250000	236250000	182370000	226420000	196990000	178450000	195940000	191940000	213930000	204620000	171760000	253740000	218640000	223370000	153150000	175340000	169670000	293080000	175090000
7159700	3734300	7421500	0	1853000	4320300	0	2236300	0	0	0	0	3208800	2715900	0	2758300	0	2317400	0	0	3161200	0	0	1923700	2513900	0	3882500	1990800	0	0	2084800	2576000	4311800	3945900	1846800	1823600	0	3994300	0	4802400	0	4197900	3066500	0	3647900	4209100	0	0	2532200	4642300
0	0	853630	0	1485900	0	0	0	1752400	0	0	0	2744500	0	0	0	1315200	1852800	0	0	1180600	0	0	0	2001800	0	1484800	1697400	0	0	0	0	0	0	0	0	1576000	0	0	0	0	967720	840160	0	0	0	0	0	1804000	0
17123000	12709000	13603000	13522000	17616000	12227000	15074000	10169000	14336000	16818000	17915000	17180000	13304000	19430000	14440000	12490000	34751000	18341000	9306600	15927000	12381000	15273000	10144000	11093000	14218000	19332000	12535000	14781000	21666000	18184000	12137000	13236000	24400000	25056000	12396000	15769000	19914000	14353000	17322000	10182000	21468000	20682000	15925000	15119000	17740000	12652000	12218000	10664000	20561000	26708000
273300000	321750016	391590016	466790016	371710016	443540000	336280000	391760000	360049984	311689984	297480000	295889984	290280000	423740000	355150016	416809984	330400000	419809984	327640000	347440000	317510016	371630016	465400000	366089984	333809984	421710016	399320000	401030016	345900000	380929984	338950016	334449984	338500000	355740000	358960000	448040000	411140000	301689984	373880000	391900000	360880000	329390016	368270016	329900000	415520000	534700000	289689984	438280000	497849984	401750016
0	0	0	0	0	0	0	0	0	0	0	0	0	0	0	0	3245800	0	0	0	0	0	0	0	925000	589770	507040	0	0	0	0	1211800	0	532600	0	0	0	0	0	0	0	0	0	0	0	0	0	0	0	0
0	0	0	0	0	0	0	1330500	1390200	0	1522500	1632900	1649400	0	0	0	1426900	1316600	0	1317000	1498100	0	0	1405600	1665700	0	1676900	0	1370400	0	1466500	1542600	0	1738200	1771600	2740400	0	0	0	0	0	1500700	0	2452800	0	0	0	0	0	0
17746000	13483000	11784000	17081000	13505000	13649000	15629000	15144000	13900000	18946000	15171000	16709000	18536000	16378000	10853000	13142000	20339000	18301000	19058000	14062000	18925000	10544000	15944000	17466000	23864000	0	21114000	17632000	16294000	12012000	15941000	20099000	14108000	15335000	12085000	9326100	18041000	9304400	9242300	11241000	20254000	14999000	20921000	17395000	22582000	16388000	9622900	11080000	25699000	17982000
0	0	0	0	0	0	0	0	0	0	0	0	0	0	0	0	0	0	0	0	0	0	0	0	0	0	690110	0	0	0	1457800	0	0	0	0	0	0	0	0	0	0	0	0	0	0	0	0	0	0	0
0	0	0	0	0	0	0	0	0	0	0	0	877840	0	0	0	0	0	0	0	0	0	0	0	0	0	0	0	0	0	0	0	0	0	0	0	0	0	0	0	0	0	0	0	0	0	0	0	0	0
22469000	24231000	13422000	20428000	20984000	27102000	19037000	19927000	28237000	24374000	18769000	17114000	8471900	28067000	17262000	19803000	17720000	19804000	22274000	19747000	14916000	20693000	18622000	18365000	15254000	17497000	17971000	17138000	31046000	20685000	15472000	23927000	16613000	17863000	10462000	25781000	20768000	15272000	17617000	26828000	25149000	26041000	13854000	26676000	23774000	24980000	26728000	15345000	20177000	25199000
0	0	0	0	0	0	0	0	0	0	0	0	0	0	0	0	0	0	0	0	0	0	0	2989000	0	0	0	0	0	0	0	0	0	0	2363700	0	0	0	0	0	0	0	2287600	0	0	2192900	0	0	3494700	0
0	16810000	4794000	4997400	4154500	4376600	6136500	4064000	8496700	3460900	0	2903300	8705400	12241000	5446000	5060100	11240000	9312700	9458600	6993600	9375700	7929300	4400600	4474600	3960700	3516000	6074800	6032100	6665700	6261000	8369300	5268300	5571600	13093000	5297200	2485000	5460300	7619700	4030700	5581200	7625300	9796700	6115300	6653100	10155000	3819500	9482700	3800300	5526800	5553100
0	0	0	0	0	0	1039400	0	0	0	0	1199300	0	0	1244300	699840	0	0	0	698280	0	0	1378900	0	0	0	706410	618120	1266100	0	1016100	779930	0	645430	0	0	0	0	0	0	0	0	0	0	0	0	0	0	0	1662100
3526800	3689500	2661100	8571500	6342600	3501300	3089900	5361300	3851600	2569200	9678200	3545100	1590000	6775600	0	3486800	4118300	4091000	1792700	3473200	2822800	2993000	3263000	4743300	2435400	1474000	2071900	3190700	3286700	2355300	3476200	6089500	0	2960100	3289400	4049700	3388100	3403000	2061300	1907900	2748300	4725700	3690000	7292600	3299500	2665500	3667000	0	0	4332400
18960000	14868000	26080000	18429000	12324000	13312000	36504000	12654000	12995000	16716000	33256000	0	11752000	15087000	28033000	16471000	12578000	17672000	11248000	22489000	6955200	34788000	37187000	20842000	13527000	23226000	32953000	21954000	10397000	21487000	26763000	32374000	13922000	18031000	0	24176000	13254000	29883000	47619000	25960000	12675000	15612000	21913000	24952000	14514000	12105000	31138000	18401000	20106000	12419000
32534000	23633000	19117000	25234000	24935000	27195000	9060600	17031000	19181000	19947000	19373000	20178000	31675000	26690000	25649000	32746000	20913000	8522000	28221000	26316000	26816000	22683000	25488000	19937000	31323000	15121000	24930000	29855000	27803000	16807000	19193000	25593000	30092000	27020000	17313000	17678000	25102000	27131000	19595000	11800000	34410000	29832000	29367000	17405000	30358000	23730000	15134000	18006000	13016000	24115000
5521500	10559000	0	0	6825900	2953800	0	5807100	5705000	8729200	11926000	0	11263000	10163000	9040100	2738200	11295000	12616000	7309600	5717400	7524900	8612800	5338000	5321800	12848000	9018700	7660500	9914600	9484400	4585900	22698000	13671000	14550000	16870000	8210000	13849000	14567000	19981000	8240500	10628000	2846700	9809800	0	0	9364400	13742000	9387500	0	7047300	9750500
64579000	60528000	49972000	54603000	53449000	50832000	63166000	53848000	47038000	35676000	53024000	37698000	47717000	40846000	38540000	40487000	77687000	41330000	56298000	44709000	69506000	61145000	52345000	49360000	74630000	67143000	55434000	58099000	52944000	37378000	50570000	39854000	47560000	34370000	35349000	44121000	49199000	52671000	35694000	47513000	87880000	47315000	42915000	47778000	61378000	42362000	42753000	41109000	92731000	66483000
0	2639000	7351300	3969800	0	3824200	8866400	0	3366800	10349000	0	3367600	2606400	5518900	0	0	2289800	3857300	4165900	0	2771400	2941300	4648800	0	0	0	3592300	2567400	2995700	4233100	3211400	3318700	2379500	5285700	3496000	0	4825500	3005000	0	0	0	3942100	2414100	0	0	0	0	2469600	0	0
38348000	42999000	38851000	53402000	32906000	49679000	43429000	54747000	33430000	39050000	36767000	48095000	46541000	60517000	74674000	51587000	47744000	44706000	50906000	45941000	34083000	40550000	46695000	45910000	40448000	48122000	50351000	50999000	38184000	79123000	40697000	51396000	40135000	43780000	46271000	44700000	45905000	49198000	63437000	51876000	38040000	35763000	47440000	38528000	44057000	40270000	53166000	42344000	42909000	41086000
149110000	140640000	192610000	157970000	172870000	163180000	163870000	212040000	164480000	173110000	189150000	214770000	99963000	112840000	163140000	175580000	147520000	175080000	212110000	193510000	135620000	168540000	167660000	200630000	116960000	142640000	151030000	110610000	157040000	95243000	128510000	123460000	142600000	142730000	210120000	159630000	158780000	214240000	145430000	209210000	157950000	196910000	154000000	323040000	209160000	233130000	220970000	172770000	129090000	181510000
780560000	877430016	826019968	822899968	748190016	840700032	798480000	802630016	1069100032	1284300032	1145100032	1172000000	1063500032	1085299968	1017000000	1140499968	1025400000	1022200000	1434200064	1202700032	1152700032	1073299968	1138800000	1101600000	955619968	839379968	860360000	989809984	941190016	990249984	1043600000	918510016	1077600000	979070016	1107299968	1034499968	929619968	944880000	939329984	920200000	1256899968	1112000000	1054700032	1149299968	1122300032	1123000064	1048200000	1181400064	773249984	732449984
5473000	4508500	0	0	6887500	4510900	0	0	11370000	2613800	0	0	14342000	2671800	2277500	0	8769100	4401200	0	7037700	2952200	4679000	0	0	4588100	5458400	3010200	2188000	11041000	0	2011400	2621700	3144700	2814700	0	0	2761800	3260000	0	0	5788500	3060400	0	0	3878100	3578200	0	0	2855300	3087600
0	0	0	2776700	0	0	1975500	0	0	1493300	0	0	0	0	1885500	0	0	0	912320	704580	0	0	1831400	0	0	0	1166200	1924700	0	0	1945500	1075900	2308700	0	0	0	0	0	0	0	0	0	0	0	1793800	0	3263200	0	0	0
6596700	9259200	5657900	5260500	7707800	5854000	5203400	7064400	3064200	7453100	5099200	7972900	6722900	3860300	3326600	9329400	9328000	12767000	5605300	6266600	4608300	4817000	6969200	8691900	7694300	14686000	6829700	11718000	4799500	4751400	5417000	5544300	3878700	5916600	11412000	6065700	4568900	5155900	5753500	0	6415000	5519300	5845300	6719600	7320000	0	7476200	3794100	6547600	4270300
2577700	2334900	2822500	2105600	2003700	0	0	0	0	0	2830000	671190	0	2355600	0	2437500	1710600	2295400	0	0	1974000	3293300	2036800	2309700	1745000	2850700	2127100	0	1863200	3523500	2330400	2205700	0	0	0	0	4811600	0	0	0	4135200	0	0	1288100	1602800	0	1441700	0	2124000	2471100
32250000	31195000	14363000	11722000	5425700	24490000	18807000	24240000	20664000	8268500	17821000	12147000	17917000	53529000	17840000	23459000	12819000	24727000	24331000	21270000	16965000	26893000	23639000	24933000	19231000	22978000	22856000	26653000	17665000	15547000	21613000	25485000	27499000	19647000	29069000	11547000	27299000	27708000	17612000	12692000	4989000	28150000	21777000	28806000	12529000	26308000	18217000	23137000	20948000	18531000
9544200	7367400	5279100	8487800	7723700	7398600	9521100	13358000	5346300	3537900	6344400	16135000	7544900	13413000	11484000	11845000	9937000	8090400	4335400	7594700	9631700	4983500	6471200	9857700	9339900	16634000	9706100	13168000	9157700	0	5771800	9778500	9618400	8253700	4443700	4142000	3367700	4982600	4628300	5717000	4818600	5513800	7801200	0	5664700	4624400	4200100	6129600	6733000	3186200
12580000	4078200	4756800	5167500	4491700	3803900	2784100	3934300	3736700	5793700	3860200	4188100	5080400	3935600	4134600	5178800	6272100	5394300	3635700	3775000	5487300	4137500	4476200	6259700	7099900	3936600	6343900	5364300	3498700	0	3269800	5623600	7056600	8646400	4034500	5767700	11535000	4811200	4798900	3679000	6663700	4918900	3809200	3750100	7275200	3192600	7051300	1795600	0	7708800
23003000	26456000	23233000	26774000	25904000	29231000	27868000	29005000	20374000	40536000	24717000	29634000	31307000	21440000	33932000	27454000	35528000	26071000	23443000	26210000	31132000	32080000	23321000	36131000	32169000	27134000	29043000	28339000	28974000	23870000	25871000	31843000	34344000	31793000	19786000	29373000	37590000	27491000	19220000	24889000	25883000	47355000	28322000	27218000	31837000	27329000	23637000	25726000	25774000	29731000
166110	207780	176240	148270	0	182520	0	131800	0	140180	178430	156920	0	220630	153340	163070	168740	201590	180070	154920	0	138850	157630	132160	279890	247910	171780	177540	129270	0	104370	135760	141970	135650	0	200450	112360	164940	127120	200660	244680	209050	200290	249710	153800	157010	134820	0	212840	215510
3606200	1321200	3421100	0	3984300	36781000	6906000	4000500	5154900	5749700	2925600	0	3887300	5006500	4821600	2488200	4431100	6400000	0	3010300	5159100	5475000	6749800	0	0	3695800	5116700	2934100	4218200	3449500	1391700	0	0	7999200	3525300	0	0	3182500	1419300	0	0	4935400	6341300	0	0	2020500	10909000	0	5030500	0
0	5552200	0	0	0	0	0	0	0	0	0	0	0	1314700	0	0	0	0	0	0	0	0	2558200	0	0	0	0	0	0	0	0	1633800	0	0	0	0	0	0	0	0	0	0	0	0	0	0	0	0	2439800	0
561400000	469870016	393080000	435950016	511790016	465049984	436009984	576099968	497220000	435470016	515350016	528209984	593660032	401089984	398820000	442449984	598769984	433780000	412590016	456270016	502420000	416230016	391100000	503270016	535620000	448409984	352880000	492129984	478390016	355249984	447840000	479489984	483609984	431209984	357500000	273360000	448630016	497040000	309449984	360620000	633030016	518200000	446960000	455580000	487400000	372800000	366600000	295800000	496550016	606739968
0	0	6387600	0	7840400	0	9700200	4416900	5234100	0	0	0	0	0	4504500	0	0	5656800	0	0	0	0	3964800	0	0	5341800	10077000	5202700	0	9542000	7530900	0	0	0	6322500	0	0	0	2186000	0	8576000	0	0	0	0	10365000	7060200	0	0	0
29170000	14786000	19652000	11238000	15625000	16209000	14809000	22768000	12450000	13062000	13943000	20401000	9267400	15823000	25273000	0	15439000	17700000	15575000	13835000	12010000	16193000	24241000	17996000	16340000	29179000	22394000	17213000	14533000	22074000	14830000	22926000	13036000	0	7609300	11106000	13897000	6266000	0	14353000	27123000	23339000	21850000	17535000	16914000	19140000	22428000	7255300	15790000	12588000
4786100	6996700	8596100	11467000	5393400	11198000	10635000	12803000	7451800	10295000	8219900	10858000	7956700	8949700	8920700	11714000	5930000	6186800	9294900	9613300	6105900	7048700	10466000	9596800	6620900	9793900	8945700	9020900	6943800	9389100	11182000	8565400	3943200	5399900	8955900	12760000	9539100	6890200	10910000	13914000	3536300	9653900	8850700	13792000	6092300	5828600	12463000	13846000	13538000	3534200
18049000	18826000	18188000	18365000	15036000	28792000	18986000	20497000	14370000	14491000	16029000	17883000	14607000	23727000	17288000	24957000	16005000	21719000	17109000	14107000	15019000	7678600	4595400	24337000	17493000	17110000	21334000	18561000	19756000	21227000	23980000	25982000	10044000	16799000	0	18610000	11471000	20799000	12172000	19555000	9873100	18454000	11889000	20287000	18528000	21231000	19907000	16883000	14758000	13441000
675270016	744300032	921240000	901480000	615400000	889379968	983000000	876960000	871470016	883710016	921950016	977790016	680870016	812569984	902249984	946560000	616220032	797200000	1007400000	924700032	600289984	732729984	858520000	959340032	781699968	1049100032	835649984	956129984	765449984	960369984	988579968	792240000	530910016	655859968	951859968	1251500032	534830016	735219968	796990016	1014700032	632209984	775769984	1031100032	1019400000	693960000	899590016	784339968	871009984	619660032	634120000
4196300	3130600	3152500	0	7227700	3413300	2864700	5338500	3669900	5598000	4196100	1695100	4192300	2211800	4054700	0	0	3210600	6004900	2926000	3702300	3852000	4169700	4062700	2183100	0	4176000	4125700	7234800	0	4662000	4174400	0	4261900	3488400	0	0	2472800	0	0	4256500	3596300	5168700	7566000	4489600	3819200	4296500	0	3663400	2246400
40733000	35206000	39739000	40346000	36083000	35638000	38375000	42818000	43655000	51528000	35493000	40355000	47469000	38964000	38719000	42119000	50507000	54538000	48257000	49829000	41564000	33978000	37764000	51924000	44279000	40132000	52712000	56931000	49331000	47288000	40505000	42326000	37210000	42804000	59636000	41422000	21998000	42385000	45293000	28707000	41308000	39851000	50412000	42037000	52293000	41763000	42577000	41317000	42134000	36890000
8818400	12600000	12671000	11934000	19632000	31903000	21419000	21157000	14514000	13460000	16813000	17383000	12891000	14571000	14000000	13838000	9761200	16205000	13070000	15194000	13509000	20419000	15881000	14961000	5679700	9102600	12380000	8883500	11191000	7626300	9689100	17199000	34452000	35731000	33103000	47669000	26146000	31862000	42279000	32126000	80086000	107550000	99785000	82366000	40537000	29657000	30360000	38102000	43918000	38749000
30385000	20879000	22321000	16392000	19503000	22284000	18511000	16908000	10422000	21214000	13620000	22456000	24556000	34777000	18586000	17160000	24793000	14652000	23898000	20382000	29521000	30489000	27527000	25067000	25688000	22940000	22778000	22621000	27973000	23627000	24839000	18788000	23374000	20824000	26093000	13938000	18583000	18072000	22027000	25114000	13629000	23755000	23208000	21184000	17659000	37739000	27316000	17417000	31105000	19290000
0	0	0	0	0	0	0	0	0	0	0	0	0	0	0	0	0	0	0	0	0	0	0	0	0	0	0	0	0	0	0	425560	0	0	2038200	0	0	0	0	0	0	0	3250100	0	0	0	0	0	0	0
3872400	0	6547600	0	11325000	8677600	0	12986000	12972000	5964900	5959800	6442400	8282400	5984100	5733000	14630000	8860900	0	8012400	10523000	0	6973600	0	2257600	0	0	0	0	7479400	2974800	5012500	8689200	0	10085000	0	8082400	0	14669000	8164700	0	0	3878400	0	0	0	8880100	6661500	0	5377800	6008000
54278000	53929000	54382000	52708000	51461000	49667000	49844000	56121000	42476000	11289000	51173000	33365000	52581000	51768000	46767000	68781000	48093000	95044000	42276000	47610000	31440000	56239000	48355000	53288000	57803000	41550000	49468000	52362000	66800000	60773000	75390000	50802000	63956000	66828000	50037000	45969000	50138000	51344000	33360000	32670000	65076000	43987000	62353000	55826000	42338000	57300000	62004000	64105000	87850000	59268000
18178000	6965500	0	8060300	7055200	7163500	0	9208000	10005000	5878100	8422400	8247500	0	14639000	18288000	9462800	7516500	7640900	5918200	11011000	0	7569800	21701000	10171000	12044000	8639200	7268000	5121700	11433000	0	8303800	9541100	6785100	8435800	6251700	7634800	6019500	7529200	9256900	11842000	0	0	5935500	9875600	0	10837000	0	7347200	4806500	0
144160000	161520000	158160000	144600000	183080000	154870000	176400000	147770000	149550000	128830000	130770000	142470000	178480000	145790000	149450000	189970000	166490000	127790000	134490000	133810000	200450000	167480000	181630000	164750000	200960000	180670000	159360000	159400000	179670000	164800000	151370000	146560000	132720000	160050000	133950000	120230000	190760000	162470000	157980000	121250000	159230000	184970000	155920000	145320000	178070000	164460000	145630000	155370000	180920000	201270000
11477000	8151200	12469000	6564400	0	8680100	7103700	5359400	6428100	6724300	0	7962200	9193800	9202000	0	7896100	7666800	5260600	5430300	0	11929000	14132000	0	6459400	8096500	15234000	9025900	0	6615000	5762900	6283300	0	13928000	9885900	4874000	4698800	38917000	10295000	19091000	5414000	10698000	7524100	0	0	8316800	7859600	4924400	4510600	5467500	7280000
0	0	0	0	0	0	0	0	0	0	0	0	0	0	0	0	0	0	0	0	0	0	0	0	0	1626100	0	0	0	0	0	0	0	0	0	0	0	0	0	0	0	0	1058000	0	0	0	0	0	0	0
1966300	1699000	0	2903300	1531200	1341400	0	0	2095700	0	3079900	0	2787200	3353900	2301700	1761200	2375700	2101500	2309900	1734300	3192600	8213400	1493100	2050400	1731800	3089900	2899500	2566800	0	0	0	2720700	0	0	0	0	3012700	0	2452700	0	2188100	1500600	3122400	3235300	2095600	0	0	0	1732500	2852200
46547000	52285000	48410000	48152000	48105000	58408000	43986000	51993000	36134000	51470000	47516000	71985000	59162000	59863000	35648000	56529000	60489000	45487000	63537000	48992000	57326000	61032000	49813000	62904000	52384000	59413000	47866000	55309000	69601000	82378000	44349000	55450000	61927000	40753000	36622000	60349000	41031000	47389000	52883000	34143000	52395000	54465000	43175000	46259000	54318000	52242000	38956000	65594000	49302000	53819000
30155000	20359000	29826000	12495000	27710000	24390000	39495000	25619000	32118000	30589000	21804000	27322000	26693000	21326000	24052000	30181000	28597000	40048000	23967000	28124000	41053000	26836000	26380000	31295000	40795000	63337000	9929000	36372000	34236000	21264000	25223000	25500000	27954000	29425000	23207000	10036000	28642000	25289000	28377000	14949000	28986000	33229000	18658000	22778000	26161000	29554000	31949000	7542400	38840000	30887000
5783900160	6727199744	5731599872	6437600256	6670900224	5699800064	7048200192	7347599872	5930399744	5349400064	5673900032	5166700032	5557300224	6378599936	5833699840	5654700032	5026899968	6323999744	6200000000	6108800000	5970100224	7453799936	6261400064	6667200000	6052199936	6220599808	6168300032	6485100032	6980499968	7365100032	7402899968	6646300160	4946699776	7034299904	6277700096	6524400128	5783199744	7328000000	6091400192	8010899968	5718799872	6572899840	6084299776	7182300160	5324599808	7680200192	6428299776	5936799744	5070799872	4438000128
631040000	721569984	630200000	824430016	746230016	746760000	699619968	700249984	561960000	685539968	635689984	600329984	697089984	672640000	663939968	810880000	682120000	714769984	749110016	749720000	785360000	706579968	626099968	788739968	732960000	656220032	692840000	763939968	717600000	706240000	685569984	779580032	623440000	682550016	610440000	701160000	655619968	639209984	575299968	651059968	649660032	687369984	609329984	702280000	652369984	769049984	646009984	731150016	422960000	498580000
0	0	0	2102200	0	0	1631000	2535600	0	6335400	3964500	0	0	0	0	0	0	3489200	2857600	1499900	0	0	2925300	0	0	6648200	2213800	3680600	2766200	0	0	0	0	0	0	0	0	0	0	3814200	0	0	4775500	5094600	0	2111600	0	0	0	0
0	0	0	4744100	8982700	10182000	9981700	8576400	0	0	9916800	9824700	0	4969300	21451000	6755000	4711100	5638200	9205800	10958000	0	0	8053400	13266000	4289200	5742200	7427200	10174000	3388700	4640000	12167000	7058900	6617200	0	7808800	9113600	13061000	8739700	0	0	0	5965700	0	16943000	0	5928400	6782300	9086100	0	0
31039000	18506000	26240000	29768000	24233000	20208000	11477000	28756000	24085000	20265000	28704000	21105000	26840000	20321000	23247000	28093000	23375000	25450000	19441000	22748000	36401000	20200000	28431000	26766000	38971000	26184000	25191000	25798000	24761000	24069000	28159000	35133000	27805000	25948000	23205000	27711000	29067000	22326000	23813000	25083000	32643000	23835000	31149000	23338000	20421000	23048000	12144000	10072000	42464000	27235000
5495700	0	6030900	4889000	2707600	4535500	4760900	10163000	4467700	5389500	0	8798200	1913900	4768400	4362600	7014100	0	4985600	5055300	6979500	3545000	4545300	10712000	5215100	4207300	3876300	5343000	7185200	3613400	5301200	5277900	6642800	3079700	4063200	5542800	5898300	2221500	0	8577800	4252200	3736400	0	6810300	0	2455700	3562300	6800300	4024900	0	6296300
28077000	46507000	46758000	54795000	42316000	61095000	40625000	57881000	60102000	71332000	56098000	61702000	45487000	60153000	55123000	53904000	42074000	48199000	62599000	86674000	45072000	45949000	38800000	55134000	48793000	50632000	64124000	56771000	40571000	40772000	56181000	45070000	51456000	61930000	52500000	31321000	31504000	33301000	28072000	23760000	46614000	54560000	75931000	68303000	47779000	53310000	50711000	63808000	25516000	61395000
103200000	135390000	153160000	178420000	136890000	197710000	127560000	172250000	146740000	135770000	154900000	263500000	142780000	122160000	168830000	169630000	121400000	173470000	137710000	178430000	141990000	184220000	148940000	208400000	160260000	223190000	200910000	175570000	210600000	219170000	159860000	147050000	117450000	154380000	144350000	195920000	145100000	114770000	144310000	173070000	145810000	134460000	161270000	306260000	96920000	125030000	124800000	155440000	173560000	142130000
47178000	40486000	67360000	56034000	43429000	33603000	32901000	45853000	45477000	48765000	38162000	52116000	61298000	35865000	40791000	46392000	43383000	46437000	27923000	50165000	35251000	42080000	37300000	52621000	64300000	47925000	51274000	55291000	52777000	55807000	65460000	37985000	52169000	31474000	54152000	44492000	37256000	35563000	50174000	34077000	61670000	35868000	51769000	50194000	64441000	30662000	38718000	45987000	129130000	40826000
984129984	1116099968	997590016	1004700032	975980032	963720000	961059968	1056200000	1090599936	1100300032	1026099968	1142300032	1121799936	1003500032	1029000000	1157200000	1042400000	958800000	1086899968	1112000000	1085699968	986889984	1168899968	1088099968	1122599936	930659968	1026099968	1069200000	1122300032	1064800000	1053299968	1035900032	1071299968	1018600000	1065900032	1077600000	914560000	1033600000	1012099968	1058099968	991870016	1202000000	1134300032	1285200000	990040000	938400000	1034499968	1112199936	1207399936	1261299968
12559000	14374000	21337000	17474000	9217000	11704000	0	7547200	11921000	14991000	11572000	9645400	9912600	15327000	10160000	0	12975000	18440000	13389000	0	15500000	12890000	17703000	0	11672000	13294000	12186000	2831400	12111000	0	13630000	2961600	9252800	15209000	10690000	10921000	13158000	16098000	12590000	0	9975600	23022000	15282000	0	10317000	20368000	14659000	11518000	9023700	15020000
0	0	0	0	0	0	0	0	0	0	0	0	0	0	0	2031800	0	0	0	0	0	3899400	0	4696100	2084600	0	0	1190600	2180200	0	0	3259000	4649200	2132000	2632200	0	3371500	1659500	1912300	0	2713200	3865400	0	0	0	0	3536200	0	5696100	1612800
0	0	0	0	0	0	1087600	0	0	0	0	0	0	0	0	0	1199000	0	0	0	0	0	0	0	0	0	0	662850	0	0	0	0	0	0	0	0	0	0	0	678680	0	0	0	0	0	0	0	0	0	0
58951000	57792000	64149000	36091000	50831000	41168000	27877000	36688000	53423000	53360000	52341000	74104000	54722000	44175000	57166000	41256000	50343000	74947000	49472000	42147000	56901000	44222000	43285000	46972000	51109000	53809000	42710000	44167000	39706000	39945000	39711000	32798000	64933000	60730000	50424000	59360000	49766000	50579000	36689000	40168000	69375000	59042000	45893000	78047000	54642000	48576000	52598000	29198000	108780000	97893000
52936000	41812000	78167000	58400000	59996000	49192000	53205000	54297000	72221000	79318000	87922000	64671000	66602000	51030000	69904000	53585000	43102000	56267000	79609000	87697000	63080000	66777000	63417000	75367000	62877000	45709000	76343000	65238000	60369000	54283000	62088000	64878000	102960000	105980000	85880000	92649000	100370000	122830000	73969000	86046000	67990000	84291000	100300000	86304000	78248000	76158000	69899000	59447000	109810000	106780000
0	0	6730000	0	0	0	0	0	0	0	0	0	0	6950600	0	0	0	0	0	0	0	6008900	0	0	7496200	0	0	3655600	0	0	0	0	0	0	0	11812000	0	0	0	4343500	0	0	0	0	0	0	0	0	11231000	0
14532000	20570000	34092000	20586000	27938000	23170000	22177000	2269700	19637000	6087000	38941000	14124000	24642000	30157000	51986000	19754000	14560000	33707000	17171000	9085300	32096000	31005000	20889000	13569000	25607000	8905600	25661000	17595000	23278000	26407000	20150000	43616000	17452000	15740000	14917000	7582700	20576000	20544000	37012000	0	13134000	24881000	23176000	7408900	18472000	27849000	23487000	14359000	16338000	4400300
32070000	32052000	34611000	16212000	44702000	27912000	39902000	32443000	46686000	46021000	31132000	36529000	38522000	31594000	37933000	38176000	39233000	21757000	42036000	37663000	27694000	24495000	39031000	27713000	30259000	19364000	25997000	39330000	44018000	28590000	35902000	41896000	38497000	34261000	27355000	57607000	38521000	37529000	36039000	47129000	28276000	28682000	26462000	45190000	43159000	32873000	58226000	10607000	32105000	34556000
32840000	36467000	26521000	22151000	25371000	26268000	34316000	21065000	31607000	24250000	26841000	18899000	22107000	24394000	21151000	6362600	22246000	31100000	18714000	14831000	33151000	27124000	23304000	19393000	23926000	20044000	19117000	22582000	27908000	23764000	24722000	23672000	23977000	23059000	24433000	22179000	30189000	19332000	24364000	20137000	22286000	32835000	32316000	25025000	37050000	34245000	25296000	20306000	27459000	24781000
12633000	15855000	20750000	16227000	18403000	17269000	14398000	12623000	9373200	10664000	9251800	8312300	14354000	10727000	13815000	16630000	15978000	11691000	11307000	12941000	14433000	14129000	14735000	10418000	16468000	13911000	16608000	21472000	10808000	17905000	16820000	12369000	11207000	8647300	11888000	9696000	12443000	6552500	14467000	12875000	13228000	0	11348000	8256300	13522000	9662900	17196000	9417600	0	5570400
0	0	0	0	0	0	0	0	0	0	0	0	0	0	0	0	0	0	0	277270	0	0	0	0	0	0	0	0	0	0	0	0	0	0	0	0	0	362710	0	0	0	405620	0	0	0	0	0	0	0	0
9196100	6377100	7679100	11764000	7654300	10516000	0	11587000	13160000	16771000	0	0	5617400	11783000	12728000	13782000	9393200	6437900	10071000	7864400	13104000	0	9138600	0	9469500	6591600	8211000	31623000	6615700	0	9929100	8476300	10177000	10973000	0	8821900	7418200	7191700	0	0	8467200	10901000	0	0	7208600	9580400	0	0	7043600	12449000
5407800	7633700	0	4925800	5398300	5828600	5297600	6087900	5542000	7362600	6156100	7542700	8879700	8710100	5971800	4864700	9246700	3062300	5251600	5598000	9133300	5851400	8727500	4414600	6674300	3729500	6189800	0	6016500	4786300	7015800	3506200	0	0	0	0	7374000	8690500	0	3610600	10398000	4692100	6560200	0	4967200	6865800	3827500	3511300	0	0
7341600	1755800	17577000	10790000	7792500	0	16633000	0	11415000	19869000	35589000	26073000	9774200	0	18543000	15948000	5885000	3957900	17014000	24201000	7807000	6181000	21257000	26790000	10401000	4162700	23302000	24893000	6743400	23715000	15759000	20819000	7844200	0	0	22679000	8241500	5997800	0	30222000	9080400	15658000	22013000	21565000	7981800	0	3653600	20416000	15715000	0
0	0	2920800	1078600	0	0	792830	1650800	0	0	0	3020600	0	0	0	1826900	0	0	1626400	2509400	1225300	0	2822800	3750800	0	0	669890	1107700	0	0	0	1736300	0	0	0	1718700	0	0	0	2126900	0	0	538570	0	0	0	0	0	0	0
0	0	870270	0	0	2625800	1568800	0	0	0	0	0	0	0	0	0	0	0	0	0	0	0	1340400	0	0	0	0	0	0	697510	0	0	824220	0	850200	1001800	0	0	1017300	0	0	0	0	0	0	0	0	0	0	0
8668000	4884400	5087900	4391400	7104500	5781900	10689000	9090300	5238500	0	8189600	9298800	9477100	6138700	11240000	7518500	7874900	4300700	10764000	9131100	6652800	0	14453000	6687300	5918000	0	0	0	8087200	0	7618000	6833700	6836500	5329200	0	0	7239900	5490900	6836500	10794000	5292600	9755300	0	4555900	8004400	6749600	10878000	9508900	4006500	3389300
70156000	87282000	61514000	90346000	87458000	89826000	82504000	84515000	91424000	68880000	60943000	72351000	90970000	122990000	95332000	100970000	84304000	76852000	74966000	60958000	73733000	84298000	79074000	92720000	79193000	61475000	56303000	63082000	86756000	88556000	74607000	86957000	53059000	64817000	75089000	78045000	69456000	90489000	74905000	79273000	55829000	57750000	46699000	56654000	66547000	74169000	67882000	91694000	19641000	49020000
0	0	0	0	0	0	0	864110	0	0	586780	0	0	1105500	662860	1058500	0	0	0	0	0	0	0	0	958070	0	860710	0	0	0	1131000	0	0	0	0	0	0	0	0	0	0	0	0	0	0	0	0	0	0	0
31768000	21192000	15931000	23198000	31288000	28891000	21580000	26068000	20222000	28649000	16937000	22574000	37011000	29694000	16836000	20967000	26884000	32055000	35519000	20144000	29151000	39162000	22361000	24588000	28299000	21933000	26221000	29146000	32433000	28139000	52177000	29861000	23483000	30114000	22790000	17167000	23422000	19044000	21760000	19070000	34726000	24282000	21211000	38364000	32171000	22884000	22316000	14680000	35723000	20242000
14280000	7294600	0	4242300	3168000	4035600	6732700	6735900	7292600	8358600	7244100	4536900	9798000	7949300	5529500	6001600	9022800	0	8002700	8337700	8978800	3467100	3900000	4480800	5330800	8900300	5391800	5105700	4810500	11552000	3296800	4630900	10072000	8147200	4229800	7574800	8836900	6141000	0	2880900	5830300	6006800	6147100	0	4235800	6236600	0	3958500	11658000	9022300
4316900	6863800	7462500	5611700	7514000	7067800	7402600	10522000	9585700	12309000	7255800	7482000	4772700	8501600	7342500	9900400	2501600	3611900	3932400	3387400	5670100	5162200	6256900	7508100	3843800	5648900	5206000	6334500	5139300	0	5240700	7166600	5605700	7512200	9245300	12404000	9653100	11870000	9056000	13851000	4512900	4229700	5551900	5099700	7531700	11002000	7096000	9269200	2108800	5047800
0	0	0	0	671960	0	0	0	581920	0	0	842820	640710	0	0	0	566910	0	0	0	457440	0	237930	0	788050	0	0	0	0	0	0	0	0	0	0	0	0	644050	0	0	1142800	0	0	153800	0	0	0	0	0	0
1928800	0	0	0	0	0	0	0	0	1226100	0	0	2125500	1427700	0	0	3192800	0	0	1225600	0	1838900	0	0	0	0	2623100	0	0	2760100	0	0	0	3201000	0	0	2130300	0	0	0	0	0	0	1074600	0	0	0	0	0	0
6927600	9205600	5550900	9840800	7849500	7939100	9820300	17135000	8300700	12272000	10046000	5699600	4867000	10170000	5105100	7823700	6253700	9368800	7347000	13407000	7366300	11901000	6811800	10469000	9470700	0	6938700	0	12201000	10794000	6710200	10630000	9153600	13919000	10417000	14794000	8759000	11726000	7180900	0	7358900	14245000	6275700	8953900	4761400	8937100	6543200	6810200	9501900	14778000
0	0	13546000	7399800	0	13560000	8390400	0	9688500	8110900	0	0	9756500	0	10290000	14684000	8857400	55789000	11353000	0	14453000	5976000	8581300	15101000	11812000	5173100	10522000	10573000	10819000	5758700	10329000	29687000	1450500	0	8346600	6385300	1923200	5064500	0	19311000	0	0	0	0	42501000	3704100	7737300	0	0	0
152710000	185000000	282360000	287580000	164700000	234150000	277400000	266200000	312400000	191880000	203110000	251950000	180050000	226010000	239270000	257430000	150870000	238450000	239120000	234350000	251590000	194390000	237300000	252200000	228320000	223460000	240810000	247020000	225390000	249240000	225470000	250310000	151370000	161220000	292129984	219960000	196650000	181960000	251050000	211190000	203910000	218150000	219880000	200150000	156200000	201980000	230380000	244140000	170880000	178800000
6323900	3629100	3253900	0	2372100	2991200	5052800	4153100	3626400	5176300	3513200	4647000	3751700	0	4553300	3639300	0	3992000	2168100	2062200	4010400	4820200	0	2531200	3666400	0	4379400	5309300	7147500	0	3070200	3633800	3321500	4799800	6508400	0	9238500	3904900	0	2804900	3314500	4607200	3539700	3025600	2551000	0	0	1772100	7017300	4350600
0	0	3638700	0	0	0	0	0	3261000	0	0	0	0	0	0	0	4238100	9288400	0	0	0	0	0	0	0	0	0	0	5188300	0	0	0	0	0	0	0	0	0	0	0	0	0	0	0	0	0	0	0	0	0
7534400	19422000	10040000	7509800	7373000	7461300	9607900	6214000	4884300	6512800	3755200	22683000	10646000	5333100	7533800	8848600	7810000	17816000	10137000	7071500	3591700	0	10112000	8520200	7468500	0	12789000	9306500	7481700	2564900	6722700	10697000	4357600	6083500	7340300	9278100	6051300	6187400	8518900	3890000	6010100	9375300	5626400	4615800	5714900	8411000	4534400	5161000	5556600	10051000
0	1565700	1503200	1751100	0	1449000	1488900	0	991720	1119200	0	0	2121300	4340700	1840700	0	0	0	2556800	0	1742700	8644100	1563400	0	1446300	1079900	2054900	1740300	3837000	1064100	963440	2091500	0	1188300	1876700	0	0	992100	0	0	0	2763700	1530800	0	0	1726000	1777200	1034000	1090800	0
26687000	24107000	25629000	22331000	25829000	19921000	14320000	11508000	16854000	21964000	20316000	12669000	18578000	26716000	20243000	23313000	17184000	27007000	20603000	28216000	23952000	21724000	23196000	22161000	23768000	22975000	13087000	25346000	34389000	26389000	24186000	27891000	21036000	28849000	30658000	29826000	30842000	18218000	20375000	36334000	26059000	22804000	27028000	17442000	21937000	26949000	27052000	18840000	24196000	20252000
46338000	29467000	22453000	20654000	34474000	19397000	21449000	10981000	11021000	19206000	8885900	14901000	13765000	13413000	9140100	12018000	26523000	12280000	10858000	14248000	0	0	0	0	14172000	5836000	7106500	8142800	4863000	11753000	1380300	10442000	23928000	19644000	30450000	18634000	4077500	3839900	0	0	56947000	38876000	41513000	36743000	3310900	8702600	1310600	0	45695000	30187000
0	0	0	0	0	0	0	0	0	0	0	0	0	0	0	0	758870	0	0	0	0	0	0	0	0	0	0	0	395570	0	0	0	0	1014100	0	325560	0	0	0	0	426640	0	0	0	0	0	0	0	0	509650
0	0	0	0	0	0	0	0	0	0	0	0	0	0	0	0	0	0	0	0	0	0	0	0	0	0	0	0	0	0	0	0	0	0	0	0	0	0	0	0	0	5749800	0	0	0	0	0	0	0	0
0	1785000	0	0	0	1288500	0	0	5882900	0	0	0	1128400	0	8217500	0	2748800	2048700	0	0	2657800	0	0	0	0	0	0	0	0	1289000	0	0	0	1571800	0	0	0	1372100	1536500	0	0	1514500	0	0	0	0	0	0	0	0
7337400	2929100	1325400	0	1182300	3639400	0	0	1263000	1433800	1464400	0	2882800	1721800	0	1836800	1303600	0	0	2357800	1177000	2202100	0	0	1474400	1436900	0	0	1557400	2964400	2418000	0	2404600	1887900	2213500	2792200	3099500	1261700	0	2534800	0	3628300	0	671050	1711800	0	1999000	0	2297300	0
11363000	29676000	21850000	24638000	37277000	21510000	28536000	13245000	45179000	26189000	21846000	14135000	13724000	29629000	33556000	29553000	42733000	28123000	27740000	11013000	26435000	23087000	23201000	27322000	46887000	27809000	33172000	57507000	25737000	28034000	22117000	43495000	795850	26861000	29080000	34145000	0	39753000	39232000	41538000	15332000	27530000	29287000	30331000	0	27941000	24917000	27091000	0	33661000
11851000	12586000	8736800	11789000	11240000	7639100	10455000	15073000	11804000	15617000	0	6064000	16816000	10984000	12372000	9112800	11102000	9560900	10152000	10424000	12251000	11416000	12889000	15666000	9538400	5986100	10611000	12568000	15333000	4846300	9513500	12975000	9592100	8609100	7263000	12695000	7237300	4692700	5219000	11262000	10609000	7032100	10752000	11562000	0	12653000	9628100	13225000	7458600	0
53559000	54025000	50207000	35319000	48379000	52228000	70977000	44117000	44701000	51765000	47495000	36344000	49136000	46885000	43214000	40099000	45253000	52484000	43757000	48865000	48524000	59959000	45600000	46617000	42083000	73497000	42520000	41733000	40789000	30060000	40929000	64111000	59121000	51770000	40194000	38403000	52975000	50311000	48249000	55584000	49788000	60175000	45028000	45347000	44575000	57687000	41962000	40760000	56170000	62281000
0	0	0	0	1337600	0	0	0	0	0	0	0	0	0	0	0	0	0	0	0	0	0	0	0	0	0	0	0	0	0	785230	0	0	0	0	0	0	0	0	0	0	0	0	0	0	0	0	0	0	0
2700200	0	0	0	0	3899900	997550	2574100	3047100	0	11611000	0	0	0	8953000	0	7928300	0	0	4481900	2863900	0	0	0	3420900	0	0	974490	0	0	7591500	0	2795300	2438300	0	11532000	4714100	4626400	0	0	2869500	0	3448500	0	6154000	1979900	0	0	1788100	9748000
0	0	5084100	0	0	0	0	0	3723900	0	0	4261500	0	5496000	0	4130100	0	0	45559000	8766800	0	0	2690900	5971800	0	0	2425500	4921500	4939100	2782400	3217500	36767000	3054400	3775900	0	5324100	0	2919200	0	0	7164400	8146500	46623000	0	0	4684400	5398200	0	0	0
468620000	614019968	485960000	484620000	590070016	631830016	499230016	586320000	520920000	564080000	491129984	569500032	695680000	629510016	575240000	556400000	603360000	612009984	568480000	550809984	643939968	627160000	507040000	631560000	683160000	573470016	524969984	530190016	652640000	689100032	553180032	586920000	519460000	631459968	495489984	669920000	542230016	538579968	533600000	459400000	483449984	512960000	498200000	468940000	576940032	667969984	550529984	522540000	482880000	540300032
4169000	8468200	6740100	4574700	7537200	10267000	5169700	5994600	8203800	6385000	0	6115000	9236600	7497900	5412100	7222300	5429800	5926900	3789900	6725000	8146600	10645000	16049000	8900800	8808600	7292600	8711500	5847100	7151000	8449700	6756500	7257400	6140300	7226100	10168000	4425100	8806600	8292400	19005000	0	6720100	8315900	6831200	3631200	6139200	8851200	9014900	4609000	4738500	5514500
24815000	26345000	26790000	40547000	21608000	39172000	18351000	35455000	40587000	26744000	26660000	21059000	27485000	21776000	50696000	26341000	27698000	20210000	40608000	36671000	30689000	10629000	33591000	37401000	35431000	44908000	63486000	35604000	29337000	26184000	44472000	40615000	24569000	32231000	31767000	42571000	43614000	28076000	28367000	53760000	33885000	23025000	25824000	60318000	25604000	22364000	40191000	34800000	11226000	20623000
177580000	175210000	172160000	186470000	191170000	232260000	181070000	191480000	140600000	128750000	105560000	113700000	159430000	213350000	178250000	182600000	171050000	176180000	155070000	147780000	207730000	213820000	189060000	189000000	155010000	193750000	189720000	185660000	236750000	193680000	202100000	197660000	133800000	164520000	138270000	176620000	171640000	189940000	201830000	145230000	134160000	136740000	168830000	141130000	191080000	184780000	161900000	173020000	140210000	171730000
74822000	79162000	72116000	47920000	80862000	78498000	54318000	51350000	83182000	83758000	67398000	57980000	67423000	65628000	67477000	55164000	76002000	67148000	71359000	57749000	75936000	69283000	59664000	60138000	90481000	73678000	71589000	81125000	76817000	65041000	56184000	85641000	53026000	71130000	65813000	44574000	68286000	54880000	64271000	45451000	55310000	59012000	50769000	64118000	70254000	59937000	61812000	42148000	42196000	54154000
136550000	147070000	152500000	142220000	151530000	170140000	172380000	143180000	141790000	146680000	110070000	138080000	138450000	117870000	141800000	114330000	136140000	108380000	93288000	119400000	160420000	153590000	148620000	149550000	132650000	145190000	152980000	135340000	140560000	158440000	109910000	128860000	117060000	112050000	140310000	78724000	124320000	118840000	149790000	106910000	126750000	139150000	157100000	103200000	135090000	136610000	178300000	148000000	115210000	136870000
12964000	5126900	2395300	0	1923500	0	2338300	2099400	4306300	0	0	0	0	10819000	0	0	0	0	0	0	0	0	3641500	0	4110800	0	4678100	1876000	4553500	0	7927200	0	3977900	0	6673100	0	4242300	6615100	3203400	0	5465200	0	0	0	4025300	3211300	0	0	6000600	0
85895000	98932000	80926000	77788000	82955000	91167000	81855000	86105000	81936000	111320000	86282000	117900000	106780000	102040000	90210000	107700000	110040000	94943000	121200000	110790000	99377000	91511000	117510000	111270000	97449000	103570000	80893000	85902000	88072000	83185000	96585000	94750000	84347000	110820000	92115000	86551000	93272000	105290000	107770000	100170000	98569000	75020000	81152000	97799000	96684000	116940000	89112000	100930000	72703000	76460000
0	0	2589400	0	3406600	0	0	0	7797400	99293	0	0	3565700	0	0	0	0	0	0	0	5187600	0	0	0	2007600	0	0	5216600	3857800	0	3944600	5634700	4708900	2408000	3138900	5523700	3945600	3300800	3341800	0	2401600	3381300	5235700	0	3784700	0	2010600	249720	0	1555400
12173000	8989800	9531700	15080000	5589900	11813000	12405000	0	4460900	4832100	0	0	12237000	6467400	7599800	16358000	5441100	15450000	0	5733700	6951200	10423000	13549000	0	7538400	10218000	0	7986200	6518000	8137200	0	12213000	8951800	12437000	0	0	7540500	7900900	11613000	0	8919000	15922000	12834000	8045200	8267400	9500600	7651700	0	11408000	0
67063000	95269000	77877000	75775000	78650000	74808000	88594000	56848000	98473000	62746000	43498000	69515000	90880000	57710000	51001000	79297000	82674000	90456000	49105000	56866000	60866000	76835000	51709000	94772000	110510000	67597000	65227000	106590000	64906000	71206000	86766000	65331000	126120000	60755000	48281000	29811000	67296000	70069000	70404000	48496000	61014000	70763000	84682000	55787000	67889000	68629000	50524000	51549000	75527000	85637000
20746000	20855000	15875000	21482000	12986000	8551900	7494900	16525000	18732000	24165000	16452000	22119000	19288000	18104000	17475000	20795000	15889000	15019000	21463000	21055000	21030000	17465000	13448000	35249000	16932000	13382000	18977000	12120000	14382000	26643000	17004000	12043000	13324000	14427000	14612000	18517000	14942000	7531900	10475000	9843000	18884000	14326000	8847600	24714000	22754000	17552000	22440000	27444000	0	21294000
0	0	0	0	0	0	0	0	0	0	0	0	0	0	0	0	0	0	0	0	0	0	0	0	0	0	0	0	0	0	0	623190	0	0	0	0	0	0	0	0	0	0	0	0	0	0	0	0	2068000	0
0	0	4904000	2352400	3289600	2410100	2822500	2478200	2871100	3123300	0	9719900	6683200	2931700	3297400	3534700	4178200	1844600	5992900	6328200	2451800	0	2609300	2767200	4792500	2315800	2959400	2459100	4836400	1762400	3791900	4015400	3238200	7200000	3894500	2476100	0	3273200	3272800	2581200	0	0	3350900	2209900	6367800	3424600	8136300	2610300	0	3641800
51040000	74154000	61745000	61690000	78844000	62416000	61131000	44510000	99572000	46644000	44369000	66417000	70824000	90003000	59810000	81738000	61308000	75918000	38231000	63604000	77427000	76373000	60153000	63651000	71364000	60169000	74200000	62413000	69783000	83910000	66893000	56067000	66320000	73596000	66520000	38418000	61921000	74433000	63742000	53147000	51973000	68107000	53963000	53999000	63155000	90166000	86581000	50497000	31786000	50025000
7687700	6515500	13615000	9252500	0	8272300	8410000	0	1189600	5368500	3697200	4980400	6546300	0	10843000	10815000	7943100	0	7966200	6219400	5542400	10221000	0	7515800	5889200	0	6631400	6932600	10976000	0	7929800	7595500	10413000	0	9512800	15695000	2353700	28770000	5941700	0	9128500	11591000	12004000	0	9154700	0	9305300	0	8253800	9584000
4192500	10120000	8214200	9897300	8507000	9354000	9224700	12809000	17214000	4677600	15862000	9441200	10394000	8208000	9831200	13977000	8068600	7391200	11580000	0	8574300	7204200	15574000	14689000	11484000	6225200	10521000	12189000	9566600	5159200	6046800	9131600	4872800	0	4861000	7205900	8221200	5961800	5450500	5885100	0	7931900	6683600	5784400	4333200	14233000	9139600	7298300	4825000	0
0	0	0	0	0	0	0	0	0	0	0	2956700	0	0	0	0	0	2406300	1837800	0	0	2361200	2373600	0	0	3985900	0	0	0	0	0	2315300	0	0	0	0	0	0	0	0	0	2394200	2910000	0	0	0	2747100	0	5642600	0
0	6416200	3188800	7758900	0	4209900	3507800	3125000	0	6477700	2591800	3812500	0	4788800	4021100	8766100	0	4212700	0	9092000	0	12302000	4516900	4702000	6778900	3713700	4246400	5060600	5156100	3555300	3728100	4786400	3632400	7294400	4152700	5212300	4199700	6495800	2506600	0	4862900	5899500	3713500	8246300	7256400	0	2739900	0	0	7602100
2499900	6523000	0	5679500	0	7755200	0	8451200	0	4960200	6255500	0	3111000	0	0	5660900	2744300	5418400	0	6165700	0	8144400	0	7274400	0	6838000	3500800	4628400	9169500	6189200	5934900	4848900	0	4323900	0	5641400	0	0	0	0	2084000	5532600	0	2143300	1521400	5069700	0	0	0	0
357390016	257780000	248650000	242960000	251480000	267580000	288420000	256530000	215390000	266520000	201800000	213360000	251460000	200740000	231080000	294840000	249040000	241760000	237240000	242870000	224970000	287440000	254190000	273270016	230070000	225520000	240200000	293270016	277280000	274000000	232910000	290000000	212670000	280860000	235260000	302300000	203000000	241860000	312950016	252480000	192290000	200160000	233520000	276990016	204890000	225550000	252200000	266860000	208610000	213380000
11556000	10244000	12526000	18515000	11417000	14069000	14857000	10588000	12264000	12791000	18312000	16294000	13404000	11118000	16101000	14596000	10941000	12748000	10956000	13874000	13477000	23287000	13361000	19562000	14936000	15944000	14329000	12937000	15514000	12903000	12473000	15937000	10794000	11241000	10211000	8128700	9910400	11409000	13206000	16283000	11524000	15168000	11442000	10149000	12557000	16334000	11524000	14420000	10375000	14616000
7946400	8658400	6963300	9455200	10367000	13776000	8807900	9901100	8852200	11866000	14410000	16076000	9528100	9484600	9759600	10627000	12574000	8458100	11983000	10958000	7604800	7144700	9347900	10606000	8455200	7412800	8886900	8936100	8913700	8448400	9858800	9074000	6580500	7471900	8516900	12487000	9179300	7780400	9021200	10334000	8162600	12431000	9541700	11536000	9471100	10290000	10110000	11364000	0	6463300
0	0	0	0	0	0	0	0	0	0	0	0	0	0	0	0	0	0	0	0	4091500	0	0	0	0	0	0	0	4227700	0	0	0	0	0	0	0	0	0	0	0	0	0	0	0	0	0	0	0	0	0
36867000	16191000	13292000	8061300	20960000	12749000	7282900	0	19010000	7271400	9784000	17998000	25052000	13174000	12321000	18312000	33787000	19982000	25938000	17641000	16037000	15530000	12344000	20934000	20919000	17751000	20991000	21026000	18814000	13010000	15588000	14120000	39624000	21589000	24955000	11231000	25938000	13386000	14636000	8440200	50098000	10124000	7541300	7493100	30845000	12605000	18011000	14208000	20891000	37420000
19503000	9830800	17243000	18831000	19739000	16315000	15361000	18649000	14385000	16808000	11982000	17414000	18184000	29525000	23901000	11332000	20125000	17458000	15786000	15775000	24243000	26970000	18494000	15573000	17470000	15973000	18708000	12822000	29000000	17579000	20707000	15974000	10034000	26103000	41399000	11113000	16591000	20948000	22104000	22365000	24344000	20886000	19945000	13667000	18770000	20408000	30677000	15604000	16804000	20519000
13809000	13886000	20551000	11046000	13925000	14861000	14331000	17767000	9577900	11256000	20528000	16810000	14426000	12864000	15588000	18845000	13496000	11435000	14053000	20833000	12373000	11241000	9741500	13568000	12662000	0	15681000	17133000	12631000	0	0	13671000	21585000	14443000	12602000	9165900	13070000	12272000	16182000	11459000	12454000	12071000	10510000	4716800	19697000	10292000	6548800	8897900	17532000	17637000
1071600	1855000	1414300	1729500	841140	893940	0	0	1387100	948370	0	0	723670	5928100	0	0	932920	0	0	0	1505900	0	1131500	1143000	1828600	0	1860900	1675600	1734700	0	0	0	699090	0	0	1397700	798000	0	0	1278800	1070500	1093700	0	0	981130	1495700	0	962810	1505900	1538100
1171600	0	0	0	0	0	0	0	0	0	0	0	0	0	0	0	2523000	0	0	0	0	0	0	0	0	0	0	498150	0	0	0	0	0	0	0	0	0	0	0	0	0	0	0	0	0	0	0	0	0	0
20547000	0	0	14414000	0	0	8061500	10929000	0	0	0	14535000	10163000	0	12509000	11874000	0	24754000	11351000	16894000	12148000	0	10630000	10388000	0	0	0	22604000	0	7160400	12763000	9509600	0	0	7687400	10714000	0	0	0	0	7702300	0	11409000	0	0	0	12514000	0	0	0
51246000	75277000	53110000	65912000	55269000	77592000	51792000	56759000	79921000	55912000	52952000	62072000	77457000	62248000	76986000	64670000	73247000	54158000	69420000	59422000	71896000	69522000	56143000	69705000	58825000	50626000	57971000	61705000	61618000	83166000	53263000	63617000	60163000	62432000	49379000	49248000	46139000	54273000	67277000	47233000	53274000	63064000	43612000	50983000	44853000	58648000	61084000	46208000	64658000	60363000
398910016	309620000	279830016	297609984	274390016	347680000	291400000	402449984	323569984	300820000	270489984	428670016	320800000	259720000	422169984	352880000	319009984	344500000	295540000	379860000	328020000	298110016	263430000	271729984	285800000	436630016	289900000	350240000	457260000	489540000	259660000	292780000	401289984	278110016	290480000	266500000	390260000	379630016	282060000	246020000	279329984	295230016	267660000	232230000	383080000	386420000	295240000	344030016	306169984	248610000
65460000	63585000	100690000	150080000	72209000	67792000	95306000	205800000	71301000	50454000	45803000	122740000	47526000	61443000	130840000	80938000	50172000	55079000	49566000	110410000	39902000	55970000	44345000	43766000	51637000	56915000	67099000	82773000	95499000	67064000	67683000	75620000	94991000	89862000	99985000	51313000	77581000	51800000	78040000	79381000	48981000	105720000	60851000	49727000	88077000	94631000	49479000	76987000	123270000	96065000
65307000	62123000	52947000	47972000	39094000	52569000	0	49571000	44279000	48870000	38519000	35845000	37306000	60320000	43025000	71809000	71988000	57726000	0	0	50511000	66256000	69766000	29522000	84249000	75798000	48009000	84964000	59060000	83112000	59472000	63074000	67666000	62083000	32817000	49477000	48315000	60757000	44935000	37552000	78808000	75923000	40270000	47751000	50626000	64393000	81396000	35527000	94457000	114590000
23986000	26138000	27431000	34033000	60627000	44037000	55795000	68316000	15294000	22915000	0	8011500	21233000	12016000	20087000	6504700	14998000	11888000	16892000	0	19471000	14055000	14587000	8385100	20473000	9863100	19490000	15474000	23745000	28076000	28402000	33625000	41964000	45849000	31327000	39405000	23070000	24169000	14984000	28308000	12827000	22908000	25667000	24766000	14751000	17075000	13284000	15300000	103880000	100620000
295360000	385190016	419689984	365110016	328369984	358000000	327540000	384100000	227250000	342700000	290380000	315190016	252640000	201180000	325120000	238080000	262970000	248430000	296409984	313569984	235940000	267000000	251650000	270760000	244200000	263890000	266850000	240390000	229060000	240160000	213630000	256710000	288289984	288340000	325550016	257800000	284769984	321600000	286169984	231830000	298820000	403040000	398950016	332649984	290820000	330649984	345950016	460390016	430630016	399120000
0	0	0	0	0	0	0	0	0	0	0	0	0	0	0	0	0	0	0	0	0	0	0	0	0	0	0	0	0	0	0	0	837690	0	0	0	710020	0	0	0	977050	0	0	0	452240	0	0	0	0	0
33269000	47582000	38265000	34954000	22822000	34814000	35224000	31271000	38817000	33818000	44452000	54799000	37834000	45238000	47493000	39940000	36283000	47799000	38480000	34244000	37853000	44429000	35689000	30055000	49301000	33400000	32268000	37712000	31816000	39007000	40608000	37988000	17834000	35961000	39129000	42276000	45427000	38484000	40309000	37006000	35121000	47500000	49671000	14084000	37271000	43559000	39000000	49709000	60829000	51445000
140800000	161690000	138160000	149220000	154990000	167010000	167840000	175520000	226550000	184820000	192720000	171520000	159540000	167660000	155190000	135960000	171450000	154400000	176120000	118740000	165610000	127840000	143240000	153920000	150670000	171250000	127710000	151250000	182890000	139590000	127400000	112930000	163270000	228680000	171760000	155450000	169430000	187390000	151280000	152820000	149900000	179900000	142770000	165770000	158610000	122630000	105300000	153880000	153200000	168960000
14486000	0	0	0	14243000	0	0	24708000	0	0	0	0	14955000	16056000	0	0	0	0	0	24490000	14007000	0	0	29725000	12744000	0	0	0	18043000	0	0	0	11438000	0	0	0	10894000	13205000	13806000	0	13816000	22735000	0	48738000	17452000	0	30900000	0	13122000	19874000
13361000	16234000	12048000	10482000	14643000	9021200	17433000	10658000	13694000	11349000	10151000	10005000	19359000	18039000	12913000	13387000	13163000	16607000	14321000	11232000	17347000	19983000	11925000	11300000	16873000	13987000	17844000	12945000	14787000	16099000	9288100	14157000	12322000	19746000	20396000	7451800	16162000	23818000	11159000	12357000	11005000	8870900	8125400	7615800	15363000	9457000	16319000	9409200	12980000	10054000
0	4708700	3726700	1814500	0	0	0	0	0	0	1913300	2015100	0	0	0	0	0	0	5234500	0	0	0	0	0	0	0	0	3318500	0	0	0	2799800	0	0	0	0	0	0	0	0	0	0	0	0	0	4169600	5070800	0	0	0
3849900	0	0	0	0	0	0	0	0	0	0	0	0	0	0	0	4982500	0	0	0	2945000	0	0	0	2782600	0	0	0	0	0	0	473610	2385200	0	0	0	3450500	0	0	0	3218700	0	2222000	2455100	2555500	0	0	1844600	0	0
793440000	738700032	597510016	798160000	623100032	664230016	487070016	1263100032	518729984	546600000	745820032	1062800000	1019800000	552689984	480820000	822529984	573080000	624800000	342320000	672990016	675980032	894419968	585350016	763230016	754840000	771580032	820520000	573950016	823849984	712179968	453040000	726460032	910809984	645169984	575350016	729779968	1272800000	579689984	524900000	957990016	828910016	625350016	694230016	771710016	838809984	671480000	653729984	589529984	543000000	621260032
0	0	0	0	2899600	0	0	0	4012000	0	0	0	2819200	0	0	2795800	2609500	0	0	0	2995900	0	0	0	2875400	0	3864200	0	3882000	0	0	0	0	0	0	0	0	0	0	0	4135200	0	0	0	0	0	1939000	2085400	0	4923900
62064000	70959000	77009000	72859000	134940000	147000000	188560000	204560000	25959000	37453000	35692000	18752000	45542000	32193000	54693000	45367000	8548800	36139000	34839000	50843000	0	28927000	4980800	22208000	32078000	26619000	31524000	66974000	60090000	43722000	63183000	108000000	64469000	17841000	62201000	48530000	31244000	34011000	42821000	47657000	16172000	0	28559000	0	17308000	0	15591000	23507000	151710000	221610000
3022300	5732600	4290300	5553600	3412200	6355300	4924200	0	4430300	0	4409400	0	4170900	0	2481200	0	3395500	7760700	0	0	3453500	5870100	2680500	0	0	0	3466900	0	3505000	5522300	0	5774600	7395600	4265900	0	0	0	0	0	0	4525600	5301800	3122700	0	0	4549700	0	0	3004100	4699300
64116000	58442000	80687000	70641000	120120000	68394000	56603000	59567000	52834000	39221000	63438000	35899000	67837000	67120000	86176000	63885000	64913000	85932000	98543000	84945000	72144000	64072000	75699000	64364000	70030000	66800000	70389000	64918000	110260000	69304000	75752000	76086000	85331000	80495000	71392000	82798000	81462000	78664000	89146000	58513000	55938000	64457000	46749000	51343000	79632000	77406000	71803000	85876000	60700000	67504000
254270000	238920000	244460000	252310000	223790000	240430000	286640000	255220000	252060000	262200000	256970000	301550016	197830000	225720000	290260000	300320000	280120000	210670000	341960000	296889984	298129984	280510016	278990016	324200000	251030000	262450000	266400000	295300000	247880000	220580000	245950000	293950016	248560000	243520000	266710000	339449984	238600000	249380000	241180000	274430016	302100000	242050000	253430000	287710016	243690000	249150000	252190000	316940000	218990000	299760000
475169984	338230016	346249984	376560000	295440000	353870016	348180000	414689984	377000000	342689984	511889984	366169984	400169984	398609984	404340000	430750016	326369984	361689984	399729984	394100000	336080000	375950016	414190016	415230016	315369984	381000000	412400000	422320000	368240000	472510016	501800000	386449984	383310016	440289984	395160000	371270016	403100000	397680000	447470016	451849984	347369984	391969984	412489984	363500000	413480000	391390016	377240000	551480000	388240000	300529984
4814400	0	4474100	5765400	4036300	7842300	12193000	0	5612800	30190000	0	0	4788200	0	0	0	5529000	9977800	0	0	4722400	0	9556000	6240700	5646600	0	0	0	11222000	0	6951800	7536600	6678400	0	12827000	5895100	8362500	0	5502900	0	3910900	13293000	9991300	4917000	0	4811100	5488600	0	5657900	5942000
0	0	0	1440700	0	0	0	0	0	0	2245600	3460100	6238700	1487500	0	0	0	0	0	2978900	4979300	0	0	0	1600000	0	0	1652800	1157900	1722700	0	2214400	1702100	0	2930400	0	0	0	0	0	2681600	0	2004200	0	0	1853100	0	0	0	1731800
[truncated: 2,099 more rows]
[truncated: 56 more columns]
