# Supplementary material for: Large-Scale Protein Analysis of Experimental Retinal Artery Occlusion
Source: Int J Mol Sci. 2023 Apr 27;24(9):7919. doi: 10.3390/ijms24097919 (PMC10177937; doi:10.3390/ijms24097919)
Supplement: Supplementary file 1 [file ijms-24-07919-s001.zip › Table S2, Mass spectrometry data filtered for 70 percent valid.txt]

1d_1G1B1HO	1d_2G1B1VK	1d_3G2B2HO	1d_4G2B2VK	1d_5G3B3HO	1d_6G3B3VK	1d_7G4B4HO	1d_8G4B4VK	3d_1G1B1HO	3d_2G1B1VK	3d_3G2B2HO	3d_4G2B2VK	6d_1G2B2HO	6d_2G2B2VK	6d_3G2R2HO	6d_3G4B2HO	6d_4G2R2VK	6d_4G4B2VK	6d_5G3B1HO	6d_6G3B1VK	6d_7G4B2HO	6d_8G4B2VK	Only identified by site	Reverse	Potential contaminant	Peptides	Razor + unique peptides	Unique peptides	Sequence coverage [%]	Unique + razor sequence coverage [%]	Unique sequence coverage [%]	Mol. weight [kDa]	Q-value	Score	Intensity	MS/MS count	Protein IDs	Majority protein IDs	Protein names	Gene names
#!{Type}E	E	E	E	E	E	E	E	E	E	E	E	E	E	E	E	E	E	E	E	E	E	C	C	C	N	N	N	N	N	N	N	N	N	N	N	T	T	T	T
#!{C:Group1}1d_O	K	1d_O	K	1d_O	K	1d_O	K	3d_O	K	3d_O	K	6d_O	K	6d_O	6d_O	K	K	6d_O	K	6d_O	K
22.6995544433594	23.1058654785156	22.9796447753906	22.8746757507324	22.4510726928711	22.5781803131104	22.6318397521973	22.8982906341553	22.8919506072998	23.2213363647461	23.2742481231689	22.9741535186768	23.2134208679199	23.2842769622803	23.6563167572021	23.8899250030518	22.9839057922363	23.1662197113037	22.907096862793	22.4824237823486	22.9973220825195	22.9350738525391				6	6	6	25,4	25,4	25,4	36,9	0	150,89	970600000	188	A1E295;P07858	A1E295
22.1729736328125	23.6302165985107	23.1250801086426	23.0776767730713	22.7791042327881	23.1327953338623	NaN	23.4942378997803	23.3541831970215	23.3304710388184	22.8617191314697	NaN	23.0095634460449	22.555492401123	23.014066696167	22.6422843933105	22.7504825592041	23.348949432373	23.6178245544434	22.9015865325928	22.5151596069336	NaN				4	4	4	15	15	15	67,867	0	9,527	402120000	40	A1L0T0	A1L0T0	Acetolactate synthase-like protein	ILVBL
25.5804443359375	24.7306022644043	25.0519676208496	25.3183364868164	24.6471843719482	25.0731887817383	25.1013011932373	24.6157550811768	24.4646396636963	24.5661392211914	24.5585384368896	25.0511417388916	24.300163269043	24.8057041168213	24.4335556030273	24.792236328125	25.0846977233887	24.4335689544678	24.5609588623047	25.0276412963867	24.3107566833496	24.5743579864502				2	2	2	25	25	25	10,818	0	5,397	2858700000	96	A1XQR9;P62304	A1XQR9;P62304	Small nuclear ribonucleoprotein E	SNRPE
24.0429248809814	23.8539981842041	24.0607681274414	23.8376941680908	23.7859535217285	24.0080852508545	23.96994972229	23.9460067749023	24.3496971130371	24.4699325561523	24.0229072570801	24.5563354492188	23.7275485992432	24.3558139801025	24.209846496582	23.8752403259277	24.3737716674805	24.1375961303711	24.2586917877197	24.1421413421631	24.6247997283936	24.3379135131836				5	5	5	36,5	36,5	36,5	29,98	0	289,66	1843100000	173	A1XQU1;Q99436;Q99436-2	A1XQU1
25.4377098083496	25.4149932861328	25.6182270050049	25.6428394317627	25.45068359375	25.5312767028809	25.8154563903809	25.587438583374	25.6312942504883	25.4987239837646	25.5150833129883	25.541877746582	26.0820693969727	25.3810386657715	25.96484375	26.1112251281738	25.5655002593994	25.8621368408203	25.7544498443604	25.6247024536133	25.6715087890625	25.533805847168				3	3	3	16	16	16	23,33	0	43,41	5902900000	203	A1XQU3;P50914	A1XQU3;P50914	60S ribosomal protein L14	RPL14
24.366979598999	24.4487133026123	24.56662940979	24.223819732666	24.7779159545898	24.5488014221191	24.5369644165039	24.4619827270508	24.3390846252441	24.1398544311523	24.5353889465332	24.347240447998	24.16432762146	24.4765663146973	24.4460830688477	24.2931327819824	23.9144954681396	24.4115238189697	24.2377471923828	24.511100769043	24.3651962280273	23.8877983093262				5	5	5	38,2	38,2	38,2	15,798	0	34,202	2471400000	243	A1XQU5;P61353	A1XQU5;P61353	60S ribosomal protein L27	RPL27
22.7971248626709	23.055534362793	23.4141387939453	22.2663383483887	22.579870223999	22.3680820465088	22.8206253051758	22.7803764343262	22.3648471832275	22.6359462738037	23.0362930297852	22.4600219726563	22.708459854126	22.3993396759033	22.491340637207	22.8266639709473	22.2790699005127	22.5219764709473	22.8507328033447	22.4180641174316	22.8289108276367	22.5791625976563				2	2	2	19,3	19,3	19,3	13,333	0	4,4299	769560000	104	A1XQU9;P60866;P60866-2	A1XQU9;P60866;P60866-2	40S ribosomal protein S20	RPS20
22.4017658233643	22.748649597168	22.3790531158447	22.3428936004639	22.4859256744385	22.2653179168701	22.0531806945801	21.6586437225342	22.2995910644531	22.9007949829102	22.3267135620117	22.5717544555664	22.8714809417725	22.7399311065674	22.2516937255859	22.9245433807373	22.2124786376953	22.1430549621582	22.5291996002197	22.8242816925049	22.6320323944092	22.9942359924316				4	4	4	15,1	15,1	15,1	47,82	0	10,199	586450000	121	A1YIZ1;Q99611	A1YIZ1;Q99611	Selenide, water dikinase 2	SEPHS2
21.4692096710205	21.1052780151367	21.3627223968506	21.6658573150635	22.0137252807617	22.0003128051758	21.7086029052734	21.3400726318359	21.1802558898926	22.8198051452637	21.8914470672607	21.3910465240479	21.5112686157227	21.9659996032715	21.2030334472656	21.7690162658691	21.2978897094727	21.298942565918	22.1360683441162	22.1418514251709	21.8178081512451	21.4822616577148				9	9	9	6	6	6	254,81	0	20,074	328000000	147	A2RRP1-2;A2RRP1	A2RRP1-2;A2RRP1	Neuroblastoma-amplified sequence	NBAS
23.6655139923096	23.9041709899902	23.3449859619141	23.8795928955078	23.6966209411621	23.9116230010986	23.599853515625	23.6373062133789	23.5867938995361	24.1892700195313	23.292911529541	23.4619903564453	22.8423461914063	24.0297698974609	23.0034980773926	22.5726871490479	24.0943622589111	23.5142250061035	23.154239654541	24.0387001037598	23.3003253936768	23.4870796203613				8	8	8	23,6	23,6	23,6	50,098	0	28,081	1463000000	264	A4Z6H0;Q8N142;Q8N142-2	A4Z6H0;Q8N142	Adenylosuccinate synthetase isozyme 1	ADSSL1
22.831693649292	23.1114482879639	22.2592105865479	22.6560955047607	22.7787780761719	22.7847290039063	23.1858501434326	23.0030727386475	23.0813388824463	23.1367797851563	23.4465713500977	22.578296661377	22.9780139923096	22.8802967071533	23.3266754150391	23.6207103729248	22.6804962158203	23.7832908630371	23.2311344146729	22.536994934082	23.3037509918213	22.7687530517578				6	6	6	20,6	20,6	20,6	50,14	0	29,195	1030500000	196	A4Z6H1;P30520	A4Z6H1;P30520	Adenylosuccinate synthetase isozyme 2	ADSS
27.0075798034668	27.0748233795166	26.9831047058105	27.214973449707	27.2178421020508	27.0840835571289	27.0826721191406	27.1383819580078	27.0130043029785	27.1891784667969	26.9351234436035	27.1340770721436	26.5796966552734	27.1322402954102	26.5787677764893	26.7453746795654	27.1877098083496	27.0819702148438	26.8296718597412	26.9280242919922	26.6231689453125	27.0739917755127				11	11	10	52,8	52,8	46,9	35,624	0	193,14	14826000000	412	A5A761;Q9H9B4	A5A761;Q9H9B4	Sideroflexin-1	SFXN1
22.1401786804199	21.9281005859375	22.4278831481934	22.1842231750488	22.4378757476807	21.9086685180664	21.6149826049805	22.0576553344727	22.0086250305176	22.3383102416992	21.6646537780762	22.6051998138428	21.8656444549561	22.3895931243896	21.9324855804443	22.8377437591553	22.2809677124023	22.2670307159424	22.1396064758301	22.156042098999	21.7766647338867	21.764045715332				4	4	4	12,7	12,7	12,7	64,901	0	10,558	494650000	98	A5A779;Q92696	A5A779;Q92696	Geranylgeranyl transferase type-2 subunit alpha	RABGGTA
25.3254241943359	25.3354301452637	25.2389011383057	25.4592571258545	25.2449111938477	25.2640724182129	25.2418785095215	25.194149017334	25.1386566162109	25.2413558959961	25.5063343048096	25.2311668395996	24.6362648010254	25.3463039398193	25.3376445770264	25.338249206543	25.1048355102539	24.9378852844238	25.4046268463135	25.2265014648438	25.4717655181885	25.2298679351807				14	14	14	21,8	21,8	21,8	118,63	0	129,19	4458100000	667	A5D9M6;A5D9M6-2;P46379-2;P46379;P46379-3;P46379-4;P46379-5	A5D9M6;A5D9M6-2
23.737720489502	23.8300399780273	23.7725162506104	23.7272109985352	23.4232349395752	24.0094356536865	24.0703468322754	23.7822570800781	24.0434226989746	24.0004768371582	23.9244804382324	23.3462448120117	23.9604911804199	23.9253578186035	23.6601524353027	23.5224514007568	23.6536598205566	22.2102737426758	23.570291519165	23.7515754699707	23.6254787445068	23.9214820861816				7	7	7	35,1	35,1	35,1	41,025	0	20,596	1467800000	147	A5GFN6;P78406	A5GFN6;P78406	mRNA export factor	RAE1
26.4147930145264	26.7124042510986	26.7912826538086	26.6408557891846	26.5075836181641	26.6146602630615	26.4433650970459	26.7881050109863	26.5726833343506	26.5305290222168	26.5237255096436	26.702522277832	26.0603771209717	26.5596160888672	26.2268981933594	26.4894866943359	26.4943428039551	26.6298789978027	26.3642063140869	26.5819492340088	26.6244964599609	26.8650531768799				5	5	4	27,6	27,6	27,6	27,053	0	98,582	10881000000	422	A5GFS8;O95292;O95292-2	A5GFS8;O95292;O95292-2	Vesicle-associated membrane protein-associated protein B/C	VAPB
27.5495300292969	27.4619159698486	27.5396308898926	27.2641201019287	27.3679008483887	27.5573654174805	27.3427276611328	27.5045127868652	27.5267105102539	27.5197887420654	27.2204990386963	27.3804206848145	26.912727355957	27.113582611084	27.1406707763672	27.4443645477295	27.2902717590332	27.3754405975342	27.5848197937012	27.7538738250732	27.2723617553711	27.1868686676025				15	15	15	34,9	34,9	34,9	56,809	0	323,31	19671000000	766	A5GFY8;O43175	A5GFY8;O43175	D-3-phosphoglycerate dehydrogenase	PHGDH
22.819803237915	22.9860248565674	23.0471611022949	22.6624488830566	23.1942958831787	22.9912452697754	22.7328338623047	22.6060924530029	22.7255077362061	22.6215629577637	22.6638069152832	23.3430004119873	22.2461166381836	22.9818382263184	22.7848224639893	23.2083129882813	22.9772911071777	22.7481346130371	22.9706745147705	22.9061412811279	22.8739852905273	22.5731887817383				4	4	4	19,3	19,3	19,3	29,471	0	48,209	792740000	101	A5GFZ5;O60762	A5GFZ5;O60762	Dolichol-phosphate mannosyltransferase subunit 1	DPM1
22.9395389556885	23.3886299133301	22.8291473388672	23.3739452362061	22.8961849212646	23.0968437194824	22.6416721343994	23.24196434021	23.5931873321533	22.1861763000488	23.4407539367676	23.0052127838135	23.1225662231445	22.8504638671875	23.5602340698242	22.8315334320068	23.1023197174072	23.4045333862305	23.4129333496094	23.0352478027344	23.2646389007568	23.4421939849854				19	19	19	11,4	11,4	11,4	266,94	0	41,612	1060200000	245	A5YKK6;A5YKK6-2;A5YKK6-3;A5YKK6-4	A5YKK6;A5YKK6-2;A5YKK6-3;A5YKK6-4	CCR4-NOT transcription complex subunit 1	CNOT1
25.9212188720703	25.6435279846191	25.6030235290527	25.6182594299316	25.8088417053223	25.9786968231201	25.6236381530762	25.6781711578369	25.532154083252	25.3155822753906	25.6641464233398	25.5383815765381	25.7952556610107	25.7143821716309	25.657413482666	26.0370845794678	25.8107147216797	25.5177917480469	25.8507919311523	25.9624862670898	25.817512512207	25.8700618743896				10	8	8	42,8	37	37	46,84	0	79,07	6218100000	230	A6M931;P38919	A6M931;P38919	Eukaryotic initiation factor 4A-III;Eukaryotic initiation factor 4A-III, N-terminally processed	EIF4A3
24.5444145202637	24.5644226074219	24.7972068786621	24.2995891571045	24.5110321044922	24.5152130126953	24.4856262207031	24.7271041870117	24.5431365966797	24.9100322723389	24.1757373809814	24.7493782043457	24.5754642486572	24.7794666290283	24.4631786346436	24.4920425415039	24.7307510375977	24.5744075775146	24.5639324188232	24.5654048919678	24.1946468353271	24.530345916748				3	3	3	15,3	15,3	15,3	34,006	0	64,492	2782200000	184	A6NDG6	A6NDG6	Phosphoglycolate phosphatase	PGP
22.5207805633545	NaN	21.9411315917969	NaN	23.0935478210449	23.548059463501	22.9422779083252	23.2473945617676	22.7268180847168	22.3678703308105	22.998908996582	21.611307144165	21.6339149475098	22.4733505249023	23.1460247039795	22.7596740722656	23.9550285339355	22.6032257080078	23.0395698547363	22.6880359649658	23.2689933776855	22.7514419555664				4	4	4	27,6	27,6	27,6	33,62	0	57,598	410320000	50	A6NDU8	A6NDU8	UPF0600 protein C5orf51	C5orf51
23.5831775665283	23.6009311676025	23.6097106933594	23.6265544891357	23.1297225952148	23.2654457092285	23.3542137145996	23.4748649597168	23.833610534668	23.2258262634277	23.7281227111816	23.3641223907471	23.2568511962891	23.7964572906494	23.5087223052979	24.1790676116943	23.2904014587402	23.7505073547363	23.7675552368164	23.6651878356934	23.562047958374	23.7738056182861				4	4	4	14,6	14,6	14,6	52,47	0	193,26	1363400000	166	A6NE02	A6NE02	BTB/POZ domain-containing protein 17	BTBD17
22.5539703369141	23.0528202056885	22.6291656494141	23.0240268707275	22.8537826538086	22.9181327819824	22.9036445617676	22.6891326904297	22.7488536834717	22.7491893768311	22.7298927307129	23.1940059661865	22.3950462341309	22.5993404388428	21.9197311401367	23.0827140808105	23.0505504608154	23.0003929138184	22.1226348876953	22.6088275909424	22.6095314025879	22.4944076538086				2	2	2	10,4	10,4	10,4	36,794	0	35,857	793640000	119	A6NGN9	A6NGN9	IgLON family member 5	IGLON5
22.9848308563232	22.953634262085	23.1224784851074	23.1940536499023	22.5352668762207	22.9391613006592	22.7075881958008	23.2103462219238	22.5560665130615	23.1441593170166	22.3571739196777	23.1784572601318	22.01025390625	22.5694427490234	22.2854232788086	22.5173206329346	22.9998874664307	22.8014373779297	22.4956169128418	22.7212886810303	22.8017959594727	22.8764495849609				5	4	4	23,7	20,4	20,4	34,803	0	9,9136	830520000	139	A6NHQ2	A6NHQ2	rRNA/tRNA 2-O-methyltransferase fibrillarin-like protein 1	FBLL1
22.3632030487061	22.0761299133301	22.7861022949219	22.4609260559082	21.9394550323486	22.4134120941162	22.3672065734863	22.3203411102295	22.4417285919189	22.3398704528809	22.480978012085	22.49196434021	22.7881813049316	22.301929473877	22.3408794403076	22.086067199707	22.9412250518799	22.5890808105469	22.7562770843506	22.2951736450195	23.0790233612061	22.7849349975586				9	9	9	7,8	7,8	7,8	226,37	0	17,041	701310000	169	A6NHR9;A6NHR9-2;A6NHR9-3	A6NHR9;A6NHR9-2	Structural maintenance of chromosomes flexible hinge domain-containing protein 1	SMCHD1
24.5440444946289	24.7788238525391	25.1251106262207	24.822998046875	24.494499206543	24.5191535949707	24.8152408599854	24.3917140960693	24.4872703552246	24.5795974731445	24.8647708892822	24.6408138275146	24.4242553710938	24.8106079101563	24.828067779541	24.6628570556641	24.8905258178711	24.5609855651855	24.9592151641846	24.9017276763916	24.8381328582764	24.6238765716553				7	7	7	38,7	38,7	38,7	35,865	0	63,766	3021800000	261	A7TX81;Q7L5N1	A7TX81;Q7L5N1	COP9 signalosome complex subunit 6	COPS6
21.9372119903564	20.8705291748047	20.5012531280518	20.849573135376	17.7236080169678	23.8289051055908	NaN	20.4632472991943	22.5082740783691	21.7729244232178	20.8788223266602	NaN	23.405330657959	21.8612365722656	24.896800994873	23.8499088287354	20.4955463409424	22.1748428344727	23.1128158569336	21.1019821166992	24.354549407959	22.1056995391846				9	8	8	19,7	18	18	80,327	0	76,291	612520000	104	A7VK00	A7VK00
25.7423839569092	25.9072151184082	25.6500759124756	26.0168781280518	25.8178539276123	26.0362434387207	25.861665725708	25.7553596496582	25.8622646331787	25.8606376647949	25.9508266448975	25.6485061645508	26.0394916534424	25.8417453765869	25.8283653259277	25.8596725463867	25.9719848632813	25.7494506835938	25.9878768920898	26.1012630462646	25.8407554626465	25.781852722168				11	11	11	44,6	44,6	44,6	46,268	0	270,89	6822500000	492	A7Y521;Q9BT78;Q9BT78-2	A7Y521;Q9BT78;Q9BT78-2	COP9 signalosome complex subunit 4	COPS4
22.5709457397461	22.9545612335205	22.7827663421631	22.6801567077637	22.6108303070068	23.3692855834961	22.3349571228027	22.7682132720947	23.1822509765625	23.1853904724121	22.2722778320313	22.8698043823242	21.8184852600098	23.2095413208008	22.191967010498	22.6486358642578	22.7046852111816	23.428524017334	22.4900856018066	23.1750640869141	22.1306228637695	22.5974273681641				3	3	3	7,4	7,4	7,4	65,944	0	10,117	733770000	119	A8MT19;Q8IUC4-2;Q8IUC4	A8MT19;Q8IUC4-2;Q8IUC4	Putative rhophilin-2-like protein RHPN2P1;Rhophilin-2	RHPN2P1;RHPN2
25.0398769378662	25.0350208282471	24.7359066009521	25.0990543365479	24.9414253234863	25.0480728149414	25.1840972900391	24.7790451049805	24.6059608459473	24.3302764892578	24.8831405639648	24.8427906036377	24.0378532409668	24.3019790649414	24.4512538909912	24.711238861084	24.8686828613281	24.6771602630615	24.3145694732666	24.7823371887207	24.7007637023926	24.5204238891602				3	3	3	26,3	26,3	26,3	8,496	0	53,617	3047400000	91	P62308;A8MWD9	P62308;A8MWD9	Small nuclear ribonucleoprotein G;Putative small nuclear ribonucleoprotein G-like protein 15	SNRPG;SNRPGP15
20.9771423339844	21.2262382507324	21.4711170196533	21.0626926422119	21.2999534606934	21.9337596893311	20.9181022644043	21.1267070770264	21.4025115966797	20.8103828430176	20.8264350891113	21.4453525543213	21.5769634246826	21.6640510559082	20.208475112915	21.0185470581055	21.4047985076904	21.0604782104492	20.7350425720215	21.4010696411133	20.5278873443604	20.643928527832				5	5	5	9	9	9	113,84	0	16,423	189870000	79	A8MWY0;A8MWY0-2;A8MWY0-3	A8MWY0;A8MWY0-2;A8MWY0-3	UPF0577 protein KIAA1324-like	KIAA1324L
19.4313716888428	20.4103851318359	19.0010509490967	20.4045753479004	20.1359596252441	19.5022449493408	19.248291015625	19.2614841461182	20.6424465179443	20.3912353515625	19.4821929931641	20.134822845459	19.0619468688965	19.3623027801514	20.9236125946045	18.8640232086182	NaN	19.3661518096924	NaN	19.5487575531006	19.0648155212402	19.585807800293				2	2	2	5,6	5,6	5,6	54,652	0,0028894	2,2732	29973000	25	A8MY62	A8MY62	Putative beta-lactamase-like 1	LACTBL1
25.3893604278564	25.2552680969238	25.3070392608643	25.4993076324463	25.3503684997559	25.3583869934082	25.3455638885498	25.1462860107422	25.5143718719482	25.3289794921875	25.6148319244385	25.5509033203125	25.8074607849121	25.7494888305664	25.6551818847656	25.6552772521973	25.6031818389893	25.560375213623	25.6190872192383	25.7307624816895	25.5784187316895	25.5005950927734				9	9	9	41,3	41,3	41,3	37,35	0	305,48	5346700000	588	A9YUB1;Q9UHD1-2;Q9UHD1	A9YUB1;Q9UHD1-2;Q9UHD1	Cysteine and histidine-rich domain-containing protein 1	CHORDC1
23.6703414916992	23.4789333343506	23.9491119384766	23.9794425964355	23.858283996582	23.9709377288818	23.1864204406738	23.8685321807861	23.8543643951416	23.7285690307617	23.9618530273438	23.8034515380859	24.2201919555664	23.7016830444336	23.7031154632568	24.107479095459	24.0473213195801	24.2239437103271	23.6631240844727	23.9242515563965	24.4048080444336	23.8963375091553				10	10	10	21,8	21,8	21,8	83,989	0	43,626	1756900000	207	B0KYV5;B0KYV5-2;Q9UHB6-3;Q9UHB6-2;Q9UHB6-5;Q9UHB6;Q9UHB6-4	B0KYV5;B0KYV5-2
21.7948780059814	21.7145042419434	21.8667640686035	22.1561393737793	21.9007377624512	22.2887573242188	22.1701278686523	22.0368118286133	22.1961116790771	22.1391525268555	21.3275089263916	22.4542999267578	21.5772190093994	22.1362953186035	21.0095748901367	22.2370853424072	21.4602527618408	22.0346374511719	22.4397621154785	22.0805435180664	22.0899105072021	21.9165706634521				3	3	3	4,9	4,9	4,9	91,732	0	34,072	296950000	52	B1AK53;B1AK53-2	B1AK53	Espin	ESPN
22.0624713897705	21.8820190429688	21.823413848877	22.1000843048096	22.2160530090332	21.9437789916992	22.000171661377	22.2037410736084	21.7161617279053	21.5760250091553	22.6033477783203	22.367036819458	NaN	21.4836177825928	22.5758628845215	22.242338180542	21.9650058746338	22.3398399353027	22.7870407104492	21.6750335693359	22.1503143310547	22.5743026733398				2	2	2	11,5	11,5	11,5	29,632	0	4,9284	284700000	47	B2LYG4;Q8N6M3	B2LYG4;Q8N6M3	Fat storage-inducing transmembrane protein 2	FITM2
25.243932723999	25.3087425231934	25.1817836761475	25.2755737304688	25.1906070709229	25.1421890258789	25.2004508972168	25.3488521575928	25.4691734313965	25.1171436309814	25.2223663330078	25.2727527618408	25.2396602630615	25.3320808410645	25.5328025817871	25.3087158203125	25.183952331543	25.3872222900391	25.3080978393555	25.4050121307373	25.5344848632813	25.1596927642822				10	10	10	14,3	14,3	14,3	105,47	0	154,15	4571600000	482	B5ME19;Q99613;Q99613-2	B5ME19;Q99613;Q99613-2	Eukaryotic translation initiation factor 3 subunit C-like protein;Eukaryotic translation initiation factor 3 subunit C	EIF3CL;EIF3C
23.3134498596191	22.2311954498291	22.7917022705078	23.2582244873047	22.9381294250488	22.53537940979	22.7653560638428	22.6187171936035	23.2354907989502	22.7149410247803	22.8510112762451	22.9809818267822	22.5200805664063	22.1828746795654	23.1321983337402	23.3632659912109	22.7570343017578	22.8175582885742	23.4861660003662	22.5952053070068	22.9621334075928	22.6843662261963				12	12	12	39,3	39,3	39,3	54,28	0	216,26	904970000	238	B6CVD7;Q96HE7	B6CVD7;Q96HE7	ERO1-like protein alpha	ERO1L
24.6385135650635	24.6523704528809	24.8262100219727	24.7807807922363	24.3624458312988	24.6523551940918	24.9209289550781	24.8481101989746	24.5058650970459	24.0715084075928	24.3966903686523	23.4177894592285	24.1702365875244	24.631233215332	24.4090385437012	23.9508171081543	24.6161804199219	24.6846561431885	24.8434257507324	24.7002773284912	24.0010757446289	24.2903442382813				2	2	2	12,4	12,4	12,4	18,518	0	5,4798	2466200000	114	D0VWV4	D0VWV4
24.9977207183838	25.196569442749	25.3879947662354	25.5948295593262	25.5418910980225	25.459321975708	24.903039932251	24.7712554931641	24.6159973144531	24.6952457427979	24.7324752807617	24.7588424682617	24.6809597015381	25.1479377746582	24.477201461792	23.9774169921875	25.0449676513672	24.989673614502	24.6891651153564	25.4197311401367	24.304162979126	24.9857006072998				21	8	2	27,6	11	3,6	112,21	0	323,31	3772700000	332	D2WKD8;P54707;P54707-2	D2WKD8
25.441650390625	25.4901847839355	25.7809047698975	25.4702682495117	25.4467144012451	25.6083755493164	25.6070232391357	25.689640045166	25.3836708068848	25.3647899627686	25.4254283905029	25.4595375061035	25.4840240478516	25.6131553649902	25.6521987915039	25.3198547363281	25.4865875244141	25.3435306549072	25.767894744873	25.6641063690186	25.6852569580078	25.780590057373				5	5	5	32,6	32,6	32,6	23,384	0	272,64	5401500000	366	Q13765;E9PAV3-2;E9PAV3;Q9BZK3	Q13765;E9PAV3-2;E9PAV3	Nascent polypeptide-associated complex subunit alpha;Nascent polypeptide-associated complex subunit alpha, muscle-specific form	NACA
27.8594779968262	27.9902496337891	27.8538665771484	27.9487209320068	27.8736419677734	28.0211448669434	27.9805374145508	27.9212341308594	27.8999195098877	27.9144172668457	27.7503261566162	27.9217262268066	28.1275939941406	27.8673553466797	28.0569171905518	28.1237030029297	27.9839859008789	28.069652557373	27.8570938110352	27.9613132476807	28.0147457122803	28.0443325042725				16	16	16	43,7	43,7	43,7	59,234	0	323,31	28605000000	1074	F1RKQ4;Q3LXA3-2;Q3LXA3	F1RKQ4
26.0909633636475	26.0655422210693	25.8914070129395	26.2880744934082	26.1416893005371	26.2566967010498	26.206470489502	26.2451171875	25.776460647583	25.9819488525391	26.2781143188477	26.0457859039307	26.0323028564453	25.5831737518311	26.5851726531982	26.1122646331787	26.1057472229004	25.8530426025391	26.0442008972168	26.0795097351074	26.3408451080322	26.1564693450928				13	13	13	42,3	42,3	42,3	59,474	0	158,69	7995400000	637	F1RQM2;O95394;O95394-3;O95394-4	F1RQM2
21.5545845031738	21.3830299377441	20.7354621887207	21.2055320739746	21.1094455718994	21.5312652587891	21.7929000854492	21.4809131622314	21.5630798339844	21.8203887939453	21.4180583953857	21.366849899292	21.4187774658203	20.5580348968506	21.1650714874268	21.281156539917	21.1267566680908	20.8633937835693	21.3838062286377	21.6787910461426	20.6958389282227	21.1134128570557				2	2	2	10,9	10,9	10,9	38,668	0	23,44	248880000	86	F1RT67;Q9NX62	F1RT67;Q9NX62	Inositol monophosphatase 3	IMPAD1
24.4560928344727	24.6231575012207	24.6572933197021	24.8725738525391	24.9337024688721	24.6054248809814	24.6560344696045	24.5472068786621	24.9309940338135	24.3333778381348	24.3003234863281	24.4306106567383	23.0429840087891	24.813606262207	24.1808185577393	24.1604671478271	24.762939453125	24.136848449707	24.2234077453613	24.4156665802002	24.4762058258057	24.6049785614014				7	7	3	14,6	14,6	6,8	80,237	0	52,918	2726500000	278	F1S584;Q8IWA5	F1S584;Q8IWA5	Choline transporter-like protein 2	SLC44A2
27.4043884277344	27.4455051422119	27.1797580718994	27.5903968811035	27.3315334320068	27.4455184936523	27.380313873291	27.5359687805176	27.1754283905029	27.5190734863281	27.3667945861816	27.5161418914795	27.2205696105957	27.5364456176758	27.1605892181396	27.173770904541	27.6064472198486	27.5564060211182	27.0936164855957	27.5779457092285	27.3384399414063	27.5340919494629				24	24	9	48,2	48,2	24,3	104,31	0	323,31	19718000000	1529	F1SPM8;Q9NSY1-2;Q9NSY1-3	F1SPM8
20.8803195953369	21.390796661377	21.1466274261475	21.3551120758057	21.3082313537598	21.394021987915	21.8490390777588	21.8369083404541	21.5227966308594	21.5795154571533	21.1543102264404	21.0586738586426	21.2402057647705	21.6047897338867	22.0300598144531	22.1131153106689	22.2471046447754	21.8938579559326	21.9156875610352	21.5532188415527	21.3396282196045	21.2828006744385				5	5	5	19,8	19,8	19,8	46,173	0	23,391	189340000	61	I3LUP1;Q96IJ6;Q96IJ6-2	I3LUP1;Q96IJ6;Q96IJ6-2	Mannose-1-phosphate guanyltransferase alpha	GMPPA
23.9873828887939	24.1571426391602	23.7541980743408	24.2539978027344	24.2724113464355	24.1923694610596	24.2235832214355	24.5104503631592	24.051778793335	24.4106636047363	23.6470909118652	24.2932300567627	23.8869018554688	24.3901672363281	23.9954147338867	24.1712703704834	24.3680934906006	24.516149520874	23.9616928100586	24.1784019470215	23.6679267883301	24.212818145752				8	8	8	16,7	16,7	16,7	75,042	0	108,96	2157300000	425	O00139-2;O00139-1;O00139-5;O00139;O00139-4	O00139-2;O00139-1;O00139-5;O00139;O00139-4	Kinesin-like protein KIF2A	KIF2A
26.5016670227051	26.5992107391357	26.0655517578125	26.4314804077148	26.6078720092773	26.1901626586914	26.2659034729004	26.5111236572266	26.4042053222656	26.2677879333496	26.1195869445801	26.3462200164795	26.0516700744629	26.4745178222656	25.907262802124	26.0332851409912	26.4878540039063	26.7867183685303	26.0757617950439	26.5778102874756	26.3896389007568	26.5843124389648				8	8	8	31	31	31	36,567	0	170,9	9556800000	466	O00154-6;O00154-4;O00154-7;O00154;O00154-2;O00154-3;O00154-5	O00154-6;O00154-4;O00154-7;O00154;O00154-2;O00154-3;O00154-5	Cytosolic acyl coenzyme A thioester hydrolase	ACOT7
22.3179664611816	22.7909088134766	22.4134101867676	22.859188079834	22.9523048400879	22.8007888793945	22.9978942871094	22.4689922332764	23.0931167602539	22.7260265350342	22.4697322845459	22.6389331817627	22.3239650726318	22.1663150787354	21.1914367675781	22.0431022644043	23.6008796691895	22.7245292663574	22.5753765106201	23.1717147827148	26.0257835388184	21.5718612670898				6	6	6	10,1	10,1	10,1	117,91	0	67,761	573850000	76	O00159-2;O00159-3;O00159	O00159-2;O00159-3;O00159	Unconventional myosin-Ic	MYO1C
21.0702819824219	21.0218467712402	20.828182220459	21.1333427429199	21.1902980804443	21.7759170532227	21.4560413360596	20.9057273864746	21.7275466918945	21.1943016052246	21.7248001098633	NaN	23.1639156341553	21.6989917755127	22.5528240203857	22.0304183959961	21.3829956054688	21.7619686126709	22.0073356628418	21.8634796142578	22.4227905273438	21.4847393035889				2	2	2	18,5	18,5	18,5	23,354	0	7,5287	225800000	53	O00161;O00161-2	O00161;O00161-2	Synaptosomal-associated protein 23	SNAP23
20.903844833374	21.6861991882324	20.5854434967041	21.6583690643311	21.7105331420898	21.2137279510498	21.0533866882324	21.1877155303955	21.6164321899414	21.0086498260498	21.5467491149902	21.0418815612793	22.0480327606201	21.3088989257813	21.8177280426025	20.7928886413574	21.765308380127	21.7259922027588	21.1639404296875	20.466625213623	20.9487056732178	21.4139881134033				2	2	2	10	10	10	26,099	0,0002978	3,503	189300000	59	O00165-5;O00165-3;O00165;O00165-2;O00165-4	O00165-5;O00165-3;O00165;O00165-2;O00165-4	HCLS1-associated protein X-1	HAX1
NaN	NaN	22.6059169769287	22.8387641906738	21.7989673614502	NaN	22.3269672393799	22.1949825286865	22.0102806091309	21.9505271911621	22.8783531188965	22.78759765625	22.4413833618164	22.5817832946777	22.5407524108887	NaN	23.0016269683838	23.3247108459473	22.1239681243896	22.7567234039307	22.8320980072021	22.5848808288574				7	7	7	17,6	17,6	17,6	72,453	0	16,159	263810000	74	O00178	O00178	GTP-binding protein 1	GTPBP1
22.0129070281982	22.1750411987305	22.3017311096191	22.3935375213623	22.2339649200439	22.4302787780762	22.6327934265137	22.3668251037598	22.5155658721924	21.773754119873	22.5499248504639	22.1458606719971	22.6651592254639	22.0356330871582	22.6207275390625	22.232177734375	22.4284858703613	22.383508682251	22.3837299346924	22.4183254241943	22.3902454376221	22.6166038513184				3	3	3	5,1	5,1	5,1	67,764	0	6,7895	540440000	106	O00186	O00186	Syntaxin-binding protein 3	STXBP3
23.2033824920654	23.1247673034668	23.2567577362061	23.200231552124	23.0484771728516	23.3517818450928	23.3755912780762	22.8918724060059	23.447265625	23.7841796875	23.3890933990479	23.2399597167969	24.012149810791	23.2943229675293	23.0734043121338	22.9893112182617	23.6962184906006	23.4320125579834	23.6077117919922	23.625150680542	22.9805145263672	23.2532329559326				8	8	8	12,7	12,7	12,7	104,64	0	135,23	1135600000	210	O00192;O00192-2	O00192;O00192-2	Armadillo repeat protein deleted in velo-cardio-facial syndrome	ARVCF
23.9690093994141	23.7031173706055	23.6529426574707	23.6089782714844	23.7258262634277	23.5732498168945	23.8237133026123	23.6642456054688	23.3312644958496	23.6435089111328	23.9305534362793	23.7309303283691	23.894889831543	24.0290699005127	23.7291679382324	24.0681743621826	23.7995834350586	24.0358581542969	23.7961616516113	23.8888931274414	24.0218296051025	23.8436660766602				4	4	4	25,1	25,1	25,1	20,332	0	323,31	1622700000	209	O00193	O00193	Small acidic protein	SMAP
21.6929683685303	21.1048793792725	21.8795127868652	20.7466335296631	21.3489112854004	20.3437728881836	21.3655548095703	21.7096786499023	21.7200088500977	21.3733596801758	21.0672340393066	21.4433250427246	21.1787662506104	21.4328498840332	20.2932243347168	21.825662612915	21.4754600524902	21.9304885864258	21.7773323059082	21.5587615966797	21.1703948974609	21.6549682617188				2	2	2	10,5	10,5	10,5	23,705	0	5,204	272610000	43	O00217	O00217	NADH dehydrogenase [ubiquinone] iron-sulfur protein 8, mitochondrial	NDUFS8
26.8151702880859	26.8364276885986	26.825927734375	26.6845722198486	26.7515144348145	26.7315101623535	26.7844581604004	26.6325759887695	26.7514762878418	26.6577491760254	26.7693901062012	26.7676334381104	26.8406181335449	26.8353042602539	26.8303089141846	27.0837516784668	26.7824573516846	26.7469825744629	26.8419055938721	26.7610244750977	26.8782978057861	26.8294124603271				10	10	10	31	31	31	47,463	0	288,49	12893000000	771	O00231;O00231-2	O00231;O00231-2	26S proteasome non-ATPase regulatory subunit 11	PSMD11
25.2606830596924	24.9502964019775	25.3176040649414	25.0770874023438	25.0431747436523	25.234130859375	24.5658855438232	25.411506652832	25.2578315734863	24.9018936157227	25.4909648895264	24.8862571716309	25.1909046173096	24.9359073638916	25.180305480957	25.1200866699219	25.0981712341309	25.2891159057617	25.0103340148926	24.8584136962891	25.2378597259521	25.0844192504883				8	8	8	23,9	23,9	23,9	52,904	0	224,56	4137000000	263	O00232;O00232-2	O00232;O00232-2	26S proteasome non-ATPase regulatory subunit 12	PSMD12
22.9696769714355	23.002779006958	22.873363494873	23.0521030426025	22.8529434204102	22.8568172454834	23.1876983642578	22.7852478027344	23.1019020080566	23.1627082824707	22.8059825897217	22.9183883666992	23.727071762085	22.8904113769531	23.741153717041	22.9207401275635	22.7176189422607	22.5913505554199	22.7055206298828	22.9955272674561	23.1681327819824	23.1486911773682				14	14	14	21,1	21,1	21,1	120,5	0	81,758	829860000	160	O00267-2;O00267	O00267-2;O00267	Transcription elongation factor SPT5	SUPT5H
21.7949180603027	21.6026954650879	21.9240283966064	21.6673641204834	21.6114158630371	22.1939163208008	21.3693161010742	22.0052261352539	21.614673614502	21.7750225067139	21.9011611938477	22.1737422943115	21.6886978149414	21.4397926330566	22.188196182251	22.2868499755859	22.6067218780518	21.7775917053223	21.804557800293	22.0338935852051	22.4199256896973	21.7124252319336				2	2	2	2,8	2,8	2,8	110,66	0	6,1006	317490000	55	O00291-3;O00291-4;O00291	O00291-3;O00291-4;O00291	Huntingtin-interacting protein 1	HIP1
25.6035499572754	25.3551540374756	25.5452136993408	25.5520286560059	25.4370079040527	25.4699935913086	25.3118057250977	25.3242225646973	25.9575824737549	25.8194255828857	26.0195007324219	25.6339340209961	26.3400840759277	25.4443626403809	26.8584747314453	26.4676570892334	25.7903060913086	25.4549789428711	26.5283985137939	25.7393054962158	26.5000076293945	25.5957679748535				8	8	8	43,2	43,2	43,2	26,922	0	165,55	6800700000	413	O00299;Q29238	O00299	Chloride intracellular channel protein 1	CLIC1
24.096586227417	24.3305549621582	23.8348751068115	24.0786380767822	24.3629493713379	24.1196708679199	23.9239044189453	24.1416664123535	24.3510284423828	24.0385856628418	24.1515731811523	23.8127555847168	24.1031951904297	23.7063446044922	24.4220314025879	24.4150047302246	24.1595458984375	23.8772144317627	24.3306427001953	24.2272243499756	23.8229007720947	23.737699508667				7	7	7	27,2	27,2	27,2	37,563	0	120,29	2053100000	184	O00303	O00303	Eukaryotic translation initiation factor 3 subunit F	EIF3F
24.6424808502197	24.6935081481934	24.835521697998	24.5590896606445	24.7983322143555	24.7025356292725	24.7991924285889	24.9646415710449	24.5919189453125	24.3779411315918	24.643138885498	24.6255569458008	24.1532382965088	24.4506340026855	24.2812728881836	24.2723808288574	24.6603927612305	24.6987590789795	24.482105255127	24.7301559448242	24.6099662780762	24.460334777832				3	3	3	8,4	8,4	8,4	54,122	0	36,259	2768700000	148	O00330;O00330-3;O00330-2	O00330;O00330-3	Pyruvate dehydrogenase protein X component, mitochondrial	PDHX
23.083890914917	23.0387630462646	23.1626052856445	22.8625564575195	23.3110370635986	22.9677200317383	23.0712795257568	23.0236701965332	23.3586349487305	23.2469902038574	22.9073047637939	23.6039276123047	23.2962799072266	22.9525203704834	23.1490783691406	22.3054332733154	23.0544147491455	23.1894874572754	22.6406269073486	23.5723648071289	23.323917388916	23.2494277954102				2	2	2	16,8	16,8	16,8	20,747	0	6,4034	683100000	77	O00399	O00399	Dynactin subunit 6	DCTN6
26.913631439209	26.9008197784424	27.1294841766357	26.7428245544434	26.842700958252	27.0177631378174	27.2300624847412	27.0273056030273	27.1507320404053	26.7132358551025	27.0659980773926	26.9308643341064	27.3350830078125	27.1698169708252	27.4962825775146	27.2222595214844	26.9909477233887	26.9116039276123	27.3518714904785	27.0602741241455	27.1699981689453	26.7712860107422				25	25	23	36,9	36,9	35,2	123,63	0	323,31	15429000000	1165	O00410;O00410-3;O00410-2	O00410;O00410-3;O00410-2	Importin-5	IPO5
27.1857681274414	27.3773345947266	27.2363662719727	27.5038623809814	27.304126739502	27.3816566467285	27.3956604003906	27.3168563842773	27.1683292388916	27.1383533477783	27.2510890960693	27.3583030700684	26.914966583252	27.3480415344238	26.9531364440918	27.0268440246582	27.3074512481689	27.2934455871582	27.1052188873291	27.4481334686279	26.9688873291016	27.0566272735596				25	25	25	57,9	57,9	57,9	80,535	0	323,31	17561000000	1069	O00429-2;O00429-8;O00429-4;O00429-9;O00429;O00429-6;O00429-5;O00429-3;O00429-7	O00429-2;O00429-8;O00429-4;O00429-9;O00429;O00429-6;O00429-5;O00429-3;O00429-7	Dynamin-1-like protein	DNM1L
24.7987575531006	24.6473922729492	24.3167572021484	24.6934700012207	24.8334732055664	24.5249061584473	25.0755958557129	24.8327178955078	24.8939018249512	24.5960884094238	24.9230880737305	24.8585319519043	24.6374206542969	24.9313087463379	25.0148487091064	24.8671112060547	25.0236740112305	24.7352848052979	24.4330883026123	24.3295440673828	24.9645690917969	24.837926864624				4	4	4	15,6	15,6	15,6	39,336	0	50,278	3129500000	180	O00442;O00442-2	O00442;O00442-2	RNA 3-terminal phosphate cyclase	RTCA
22.5958671569824	22.1358795166016	22.1331310272217	22.5623550415039	22.6999397277832	22.4267272949219	22.637659072876	22.7743110656738	22.341157913208	22.4322624206543	22.0989532470703	22.1827068328857	22.5075378417969	22.6340293884277	23.0361785888672	22.0504875183105	22.37034034729	22.3414363861084	22.6994171142578	22.683666229248	22.5037860870361	22.2863731384277				2	2	2	1,2	1,2	1,2	214,84	0	5,9747	663690000	151	O00468-6;O00468-3;O00468-5;O00468-4;O00468-7;O00468;O00468-2	O00468-6;O00468-3;O00468-5;O00468-4;O00468-7;O00468;O00468-2	Agrin;Agrin N-terminal 110 kDa subunit;Agrin C-terminal 110 kDa subunit;Agrin C-terminal 90 kDa fragment;Agrin C-terminal 22 kDa fragment	AGRN
21.2452354431152	21.7310047149658	21.9354190826416	20.8892669677734	21.6379852294922	21.7398738861084	21.1749057769775	20.8767414093018	21.6374492645264	21.5463428497314	21.6845722198486	21.5305404663086	21.8457584381104	21.3421325683594	21.8771018981934	21.3739719390869	21.2378101348877	21.2118873596191	21.8772811889648	21.6334953308105	22.0677070617676	21.4716796875				3	3	3	5,8	5,8	5,8	87,097	0	151,63	320150000	157	O00469-2;O00469;O00469-3	O00469-2;O00469	Procollagen-lysine,2-oxoglutarate 5-dioxygenase 2	PLOD2
24.026668548584	24.4057712554932	24.5502681732178	24.3431205749512	24.2226753234863	24.5948905944824	24.1606330871582	24.0336475372314	24.4673824310303	24.4515495300293	24.4968109130859	23.7240524291992	24.5876960754395	24.4759044647217	24.3630065917969	24.2680683135986	24.5649032592773	24.395133972168	24.4963645935059	24.2919578552246	24.2360324859619	24.4760761260986				7	7	7	47,7	47,7	47,7	34,577	0	88,751	2315100000	194	O00487	O00487	26S proteasome non-ATPase regulatory subunit 14	PSMD14
26.1466102600098	26.2853050231934	26.0585708618164	26.1448345184326	26.084020614624	26.3134803771973	26.1225433349609	26.2014350891113	26.068675994873	26.2776412963867	26.014835357666	26.0502948760986	25.7299385070801	26.172664642334	25.8050804138184	26.1152572631836	26.0979442596436	26.2098960876465	25.9434146881104	26.1685905456543	25.941873550415	25.9887733459473				13	13	13	35,8	35,8	35,8	55,174	0	90,154	7900000000	764	O00499-3;O00499-5;O00499;O00499-9;O00499-10;O00499-7;O00499-8;O00499-4;O00499-6;O00499-11;O00499-2	O00499-3;O00499-5;O00499;O00499-9;O00499-10;O00499-7;O00499-8;O00499-4;O00499-6;O00499-11;O00499-2	Myc box-dependent-interacting protein 1	BIN1
23.5495338439941	23.0489330291748	23.6219635009766	23.9132766723633	23.3831329345703	24.307300567627	23.8257541656494	23.5984802246094	23.2011756896973	22.9652919769287	23.6733512878418	22.797887802124	23.8893718719482	23.3986873626709	24.1967468261719	23.7645072937012	23.75390625	23.7410221099854	23.8533191680908	23.4545307159424	23.8046398162842	23.7397384643555				7	7	6	22,8	22,8	20,2	57,81	0	54,34	1558000000	259	O00505	O00505	Importin subunit alpha-4	KPNA3
22.8885250091553	22.9446086883545	23.0680656433105	23.2173690795898	23.1434783935547	22.9701461791992	22.6276969909668	23.2326374053955	23.0873966217041	22.6352252960205	22.8055534362793	23.1946792602539	22.538387298584	22.817533493042	22.5192756652832	22.7432098388672	23.1169910430908	23.0640926361084	23.1715507507324	23.137580871582	22.7262306213379	22.8093090057373				7	7	7	5,8	5,8	5,8	135,07	0	12,864	880520000	142	O00533;O00533-2	O00533;O00533-2	Neural cell adhesion molecule L1-like protein;Processed neural cell adhesion molecule L1-like protein	CHL1
24.4795475006104	24.6472797393799	24.7824974060059	24.4559097290039	24.9755096435547	25.0063629150391	24.7369289398193	24.576717376709	24.6483879089355	24.4999885559082	24.6431999206543	24.6725978851318	23.9647579193115	24.4344310760498	24.0656394958496	24.3989295959473	24.5566940307617	24.6650619506836	24.4435653686523	24.3590278625488	24.4923400878906	24.8045501708984				9	9	9	10,4	10,4	10,4	134,77	0	146,72	2834700000	427	O00562-2;O00562	O00562-2;O00562	Membrane-associated phosphatidylinositol transfer protein 1	PITPNM1
24.1534194946289	24.4641189575195	23.9870147705078	23.6405487060547	24.1012783050537	23.942419052124	24.2496662139893	24.2834033966064	24.6904678344727	24.2614593505859	23.9415435791016	23.7247257232666	24.4483776092529	24.1651000976563	24.1469669342041	24.9557132720947	24.4198913574219	24.205078125	24.6209239959717	24.1366939544678	23.8945579528809	24.2886371612549				5	5	5	12,3	12,3	12,3	66,049	0	153,72	1650000000	95	O00567	O00567	Nucleolar protein 56	NOP56
26.7136402130127	26.499641418457	26.428840637207	26.6233711242676	26.4611492156982	26.6024074554443	26.7901306152344	26.5691585540771	26.3730201721191	26.3769779205322	26.5496501922607	26.4411773681641	26.3680534362793	26.6050300598145	26.743034362793	26.467924118042	26.3646335601807	26.435583114624	26.5113792419434	26.4420204162598	26.5776290893555	26.6558074951172				12	11	4	29,5	27,8	12,4	73,243	0	323,31	10773000000	665	O00571;O00571-2;O15523-3	O00571;O00571-2	ATP-dependent RNA helicase DDX3X	DDX3X
23.092472076416	23.060152053833	23.5198707580566	23.6225776672363	23.1756343841553	23.531909942627	23.2628707885742	23.3196334838867	23.589994430542	23.4287338256836	23.4296226501465	23.2268581390381	23.3769664764404	23.7548694610596	23.5487594604492	23.9663600921631	23.0000953674316	23.5743064880371	23.3538799285889	23.3711795806885	23.530948638916	23.4028167724609				6	5	5	23,8	21,1	21,1	57,886	0	57,403	1325200000	278	O00629	O00629	Importin subunit alpha-3	KPNA4
22.8437614440918	22.6217041015625	22.7860298156738	22.6709403991699	22.9728775024414	23.3454475402832	22.6293315887451	22.5018272399902	23.2924461364746	22.4850006103516	22.8585948944092	22.3948173522949	23.545280456543	23.0963306427002	23.1160202026367	22.8899078369141	22.8180828094482	23.2121543884277	22.9854145050049	22.7687606811523	22.9360408782959	22.519811630249				6	6	6	27,2	27,2	27,2	38,946	0	75,897	856540000	140	O00743-3;O00743;O00743-2	O00743-3;O00743;O00743-2	Serine/threonine-protein phosphatase 6 catalytic subunit;Serine/threonine-protein phosphatase 6 catalytic subunit, N-terminally processed	PPP6C
31.6811637878418	31.6635589599609	31.6861591339111	31.6890430450439	31.6852951049805	31.6877632141113	31.6904678344727	31.722412109375	31.8142890930176	31.8316879272461	31.7800636291504	31.9088973999023	31.8237590789795	31.8399276733398	31.6396789550781	31.6976776123047	31.7865238189697	31.8581581115723	31.6865196228027	31.8996200561523	31.7991790771484	31.9507179260254				36	36	25	54,7	54,7	38,7	84,774	0	323,31	404070000000	5455	O02705;P07900;P07900-2;Q14568;Q58FG0;Q58FG1	O02705;P07900;P07900-2	Heat shock protein HSP 90-alpha	HSP90AA1
23.1745910644531	23.5854110717773	23.964786529541	23.3976898193359	23.4632225036621	23.315071105957	23.2833919525146	23.1006603240967	22.9334754943848	23.096061706543	22.9002876281738	23.1156482696533	22.7650108337402	23.4430732727051	23.1287040710449	22.6441421508789	23.6195430755615	23.490966796875	23.4552478790283	23.5608406066895	23.1126670837402	22.9751625061035				2	2	2	17,3	17,3	17,3	14,749	0	5,4943	1100400000	118	O02772	O02772
22.5357398986816	22.5324382781982	22.6834297180176	22.3070621490479	22.3593883514404	22.1833419799805	22.2786521911621	22.1062488555908	22.9722595214844	22.6115303039551	22.8868560791016	22.2758560180664	22.5450744628906	22.4508190155029	23.0877895355225	23.0280380249023	22.0382499694824	22.5159873962402	23.2052154541016	22.144718170166	23.1140518188477	22.5153160095215				9	9	9	18,8	18,8	18,8	99,059	0	35,428	727750000	209	O02799;P52630-4;P52630	O02799
21.6534557342529	21.6250839233398	21.7613124847412	22.1092338562012	21.4892539978027	22.3681316375732	21.9624061584473	22.177755355835	22.0755672454834	22.6280250549316	21.9903526306152	21.7863521575928	22.6421241760254	21.6006011962891	22.1385040283203	22.1002578735352	21.5919036865234	21.718355178833	22.736686706543	22.1508121490479	22.2773723602295	22.6982097625732				5	3	3	16	9,6	9,6	45,855	0	71,671	358170000	67	O13010;P48426-2;P48426	O13010;P48426-2;P48426	Phosphatidylinositol 5-phosphate 4-kinase type-2 alpha	PIP4K2A
22.9954357147217	22.709659576416	22.6139240264893	22.6306114196777	23.2926464080811	22.9390907287598	22.9744453430176	23.2698402404785	23.2025489807129	23.1051502227783	22.7927360534668	23.1733589172363	23.2939701080322	23.1676216125488	23.0793075561523	23.2486839294434	23.1836585998535	22.8274593353271	23.1360244750977	22.9619140625	23.0818271636963	23.1397495269775				10	10	8	10,5	10,5	8,8	242,04	0	211,13	1007700000	313	O14497;O14497-3;O14497-2	O14497;O14497-3;O14497-2	AT-rich interactive domain-containing protein 1A	ARID1A
24.4953727722168	25.341667175293	25.2379055023193	24.9952545166016	25.0302677154541	25.217378616333	25.0512237548828	25.1415023803711	24.9238471984863	25.2970123291016	24.840970993042	25.1624183654785	24.3318748474121	25.0373611450195	24.2167091369629	24.3152561187744	24.9389457702637	25.1105632781982	24.4884452819824	24.8299121856689	24.5750579833984	25.1764068603516				4	4	4	10,1	10,1	10,1	61,877	0	254,43	3749900000	305	O14531	O14531	Dihydropyrimidinase-related protein 4	DPYSL4
22.5191459655762	22.8960514068604	22.158109664917	23.3955860137939	22.5479621887207	22.8813037872314	23.1015243530273	23.1013660430908	22.7076950073242	22.7610664367676	22.9639377593994	22.9983539581299	22.7142791748047	23.0446701049805	22.4015598297119	22.2124366760254	23.302360534668	22.7896728515625	22.6145401000977	22.9675025939941	22.8956737518311	22.6030731201172				6	6	6	26,1	26,1	26,1	70,789	0	53,949	787280000	147	O14576-2;O14576-4;O14576-3;O14576;O14576-5	O14576-2;O14576-4;O14576-3;O14576;O14576-5	Cytoplasmic dynein 1 intermediate chain 1	DYNC1I1
23.7625827789307	23.5570030212402	23.762580871582	23.7593460083008	23.7996139526367	23.744384765625	23.7460632324219	23.5375003814697	23.6928615570068	23.6067218780518	23.7588195800781	23.5355415344238	23.3324356079102	23.8708305358887	23.723331451416	23.9737186431885	23.5975208282471	23.7963008880615	23.957670211792	23.6192531585693	23.8716411590576	23.5198459625244				3	3	3	17,2	17,2	17,2	34,482	0	66,893	1537200000	185	O14579;O14579-2;O14579-3	O14579;O14579-2;O14579-3	Coatomer subunit epsilon	COPE
25.7087535858154	25.54372215271	25.5785980224609	25.6631126403809	25.6164817810059	25.7522430419922	25.5967903137207	25.5800437927246	25.5054130554199	25.2577686309814	25.5678691864014	25.576301574707	25.369457244873	25.5704593658447	25.7035140991211	25.536449432373	25.6528358459473	25.5261344909668	25.6192741394043	25.8589935302734	25.5043449401855	25.7115440368652				11	11	11	12,8	12,8	12,8	130,16	0	54,012	5708800000	511	O14617;O14617-5;O14617-4;O14617-2;O14617-3	O14617;O14617-5;O14617-4;O14617-2	AP-3 complex subunit delta-1	AP3D1
21.9972972869873	22.3433799743652	22.7280216217041	22.501350402832	22.4991550445557	22.607250213623	22.7200622558594	22.3576507568359	22.1277465820313	22.1997661590576	22.1816806793213	22.4122581481934	22.3494911193848	22.386926651001	22.3114356994629	22.3320693969727	22.4897918701172	22.690113067627	21.7753067016602	22.4056224822998	22.3749694824219	22.4305000305176				4	4	4	7	7	7	81,12	0	82,94	476200000	83	O14639-2;O14639-6;O14639;O14639-4;O14639-3;O14639-5	O14639-2;O14639-6;O14639;O14639-4;O14639-3;O14639-5	Actin-binding LIM protein 1	ABLIM1
21.4525890350342	20.8120536804199	20.9540634155273	21.0496063232422	21.1387901306152	20.9383125305176	20.9361667633057	21.0898475646973	21.1789169311523	21.1621685028076	21.2216815948486	20.8504199981689	21.0353622436523	20.8303127288818	21.1000366210938	21.6445922851563	21.7997035980225	21.2262954711914	21.9181118011475	22.9017868041992	20.7996883392334	21.3285827636719				3	3	3	13,8	13,8	13,8	34,812	0	14,843	303910000	84	O14662-2;O14662-4;O14662-5;O14662;O14662-3;O14662-6	O14662-2;O14662-4;O14662-5;O14662;O14662-3;O14662-6	Syntaxin-16	STX16
25.2462272644043	25.0466403961182	25.6528244018555	24.9127292633057	25.1734294891357	25.758695602417	25.1732158660889	24.8101997375488	25.2909069061279	25.0896072387695	25.2465896606445	24.9649620056152	25.3322505950928	25.3049087524414	25.2299385070801	25.3232688903809	25.812686920166	25.5112380981445	25.5119361877441	25.4396152496338	25.3353500366211	25.3309154510498				5	5	5	36,9	36,9	36,9	18,624	0	11,44	4690700000	288	O14735-3;O14735;O14735-2	O14735-3;O14735	CDP-diacylglycerol--inositol 3-phosphatidyltransferase	CDIPT
24.3833522796631	24.0713062286377	24.1311836242676	23.680908203125	24.2852935791016	24.1218357086182	23.7939033508301	23.8696403503418	24.1185321807861	23.8203296661377	24.0017910003662	24.4045753479004	23.430269241333	22.6413860321045	23.5752868652344	23.8729801177979	23.8557376861572	23.5342216491699	23.9744892120361	24.0043296813965	23.7797050476074	23.4291095733643				3	3	3	28	28	28	14,285	0	94,328	1713100000	118	O14737;O14737-2	O14737;O14737-2	Programmed cell death protein 5	PDCD5
24.6898994445801	24.6184844970703	24.8297309875488	24.5349979400635	24.6997890472412	24.8070697784424	24.5998020172119	24.5458202362061	24.4735412597656	24.8044357299805	24.799430847168	24.4479179382324	24.1129341125488	24.5847263336182	24.8886413574219	24.3239669799805	24.8728141784668	24.5889415740967	24.9306926727295	24.6886138916016	24.6262073516846	24.4327735900879				9	9	9	22,3	22,3	22,3	72,683	0	22,735	3007800000	333	O14744;O14744-5;O14744-2;O14744-4;O14744-3	O14744;O14744-5;O14744-2;O14744-4;O14744-3	Protein arginine N-methyltransferase 5;Protein arginine N-methyltransferase 5, N-terminally processed	PRMT5
24.0107574462891	23.9943199157715	24.5300102233887	24.074348449707	24.4038696289063	24.0008888244629	24.166633605957	24.2858047485352	23.9733715057373	23.587007522583	23.9996376037598	24.121883392334	23.2807674407959	24.3939933776855	23.4133720397949	23.6305694580078	24.0529098510742	24.3362903594971	23.7287425994873	23.8356628417969	23.8890953063965	24.2209167480469				5	5	5	16,7	16,7	16,7	43,566	0	12,113	1888700000	192	O14775;O14775-3;O14775-2	O14775;O14775-3;O14775-2	Guanine nucleotide-binding protein subunit beta-5	GNB5
23.2260723114014	23.1691112518311	22.8001880645752	23.9543437957764	23.1086444854736	23.284912109375	23.3244590759277	23.4262542724609	23.5473022460938	23.5840396881104	23.4991817474365	23.4059829711914	23.6979160308838	23.2530937194824	23.4920539855957	23.3728466033936	22.9121017456055	23.322868347168	23.4757308959961	23.4245796203613	23.219783782959	23.0834255218506				7	7	7	7,1	7,1	7,1	121,69	0	62,752	1088100000	158	O14776-2;O14776	O14776-2;O14776	Transcription elongation regulator 1	TCERG1
23.2825565338135	23.2606964111328	23.5481739044189	23.3861351013184	23.1045875549316	23.7120914459229	23.7390403747559	23.4132995605469	23.0981292724609	23.6042709350586	23.1472587585449	22.6310615539551	23.435661315918	24.0612087249756	23.122802734375	23.5958194732666	23.73024559021	23.3821601867676	23.45166015625	23.3877449035645	23.0001430511475	23.1438312530518				10	7	7	18	14,3	14,3	100,41	0	19,464	1214000000	166	O14787-2;O14787	O14787-2;O14787	Transportin-2	TNPO2
18.4377727508545	18.8844699859619	18.1054039001465	18.5242938995361	18.5015716552734	18.5255222320557	18.448486328125	17.790979385376	18.4254398345947	19.0704307556152	17.9278869628906	19.1383361816406	17.6621952056885	18.9663696289063	17.612886428833	17.9499282836914	18.8705101013184	18.51975440979	17.4448299407959	18.861234664917	17.9564037322998	18.7800559997559				2	2	2	32,8	32,8	32,8	15,03	0,003599	2,1074	28212000	57	O14810	O14810	Complexin-1	CPLX1
26.0851955413818	26.06201171875	26.1060466766357	26.066312789917	26.0189685821533	26.3182315826416	26.1889991760254	26.0817775726318	25.9092235565186	25.9728393554688	25.979419708252	25.8435363769531	25.9380550384521	25.9135837554932	25.9588317871094	25.8783340454102	26.113826751709	25.8663101196289	26.3206100463867	26.1543655395508	25.9216575622559	25.9697227478027				8	8	8	37,1	37,1	37,1	27,887	0	147,13	7517700000	434	O14818;O14818-4;Q8TAA3-2;Q8TAA3-5;Q8TAA3;O14818-2	O14818;O14818-4;Q8TAA3-2;Q8TAA3-5;Q8TAA3;O14818-2	Proteasome subunit alpha type-7;Proteasome subunit alpha type-7-like	PSMA7;PSMA8
23.1897583007813	23.1714744567871	22.9756851196289	23.6596946716309	23.0371551513672	23.3500022888184	22.9981021881104	23.0990123748779	23.5193061828613	22.701057434082	22.8763618469238	23.2513236999512	23.2681846618652	23.2096557617188	22.9960594177246	22.7676601409912	23.3022575378418	22.8117351531982	22.8759651184082	22.8322811126709	23.6851501464844	23.3683528900146				2	2	2	11,2	11,2	11,2	35,201	0	250,23	1047000000	146	O14828-2;O14828	O14828-2;O14828	Secretory carrier-associated membrane protein 3	SCAMP3
23.9948081970215	23.5047760009766	23.7859764099121	24.1648750305176	23.9947605133057	23.6411819458008	23.9019718170166	23.6717224121094	23.6869201660156	23.8057518005371	23.6521968841553	24.2673892974854	23.5810089111328	23.9046478271484	23.7098560333252	23.7918567657471	23.4708671569824	23.5195198059082	23.8022689819336	23.8213958740234	23.582836151123	23.8676528930664				5	5	5	23	23	23	37,767	0	12,082	1679700000	118	O14874-2;O14874-3;O14874	O14874-2;O14874-3;O14874	[3-methyl-2-oxobutanoate dehydrogenase [lipoamide]] kinase, mitochondrial	BCKDK
22.7562122344971	22.8140087127686	22.8336811065674	22.5938911437988	22.3503227233887	22.4717979431152	22.8737468719482	22.4333801269531	22.3648490905762	22.6565799713135	22.828182220459	22.771411895752	22.6158180236816	22.8383083343506	23.1767730712891	22.5779685974121	22.7053642272949	22.7965602874756	22.5827236175537	22.8182029724121	22.8456897735596	23.1489906311035				3	3	3	16,9	16,9	16,9	26,071	0	13,265	685910000	110	O14908-2;O14908;Q8TF64	O14908-2;O14908	PDZ domain-containing protein GIPC1	GIPC1
21.0611629486084	20.6757717132568	21.5482006072998	20.7172374725342	20.6658763885498	21.194543838501	21.2126159667969	21.1015186309814	20.3702030181885	20.6319618225098	20.4498920440674	21.0329399108887	20.2596206665039	20.6827201843262	19.8601512908936	20.8615036010742	20.4008922576904	20.5114307403564	20.2116012573242	20.122875213623	20.8335628509521	20.0928726196289				2	2	2	4,1	4,1	4,1	55,056	0	5,7036	171280000	88	O14926;O14926-2	O14926;O14926-2	Fascin-2	FSCN2
21.7046356201172	21.8104782104492	21.7981071472168	21.9939842224121	22.3352031707764	21.8841800689697	22.1353073120117	NaN	20.9952793121338	21.4994964599609	22.6132144927979	NaN	22.9641132354736	21.4818744659424	22.8131256103516	22.3725280761719	23.186071395874	22.0514144897461	NaN	22.228343963623	22.6949253082275	21.8473949432373				2	2	2	8,1	8,1	8,1	49,512	0	13,161	257740000	39	O14929;O14929-2	O14929;O14929-2	Histone acetyltransferase type B catalytic subunit	HAT1
23.2360916137695	23.1465930938721	23.8833179473877	23.3511753082275	23.5043830871582	23.3770561218262	23.3146076202393	23.4243030548096	23.4209327697754	23.4479637145996	23.6310863494873	23.2427101135254	22.5045833587646	22.7231311798096	22.8008480072021	22.8711109161377	23.1257400512695	23.574779510498	23.2299537658691	23.3675670623779	22.5422382354736	22.9473171234131				8	8	8	14,3	14,3	14,3	102,16	0	135,38	1124200000	206	O14936-4;O14936-6;O14936-2;O14936;O14936-3;O14936-5	O14936-4;O14936-6;O14936-2;O14936;O14936-3;O14936-5	Peripheral plasma membrane protein CASK	CASK
26.3850135803223	26.054443359375	26.403995513916	26.2388229370117	26.2776832580566	26.1515312194824	26.1929664611816	26.0561447143555	26.0465507507324	26.0012474060059	26.6098461151123	26.2273635864258	26.4484577178955	26.2916030883789	26.7021942138672	26.3041553497314	26.4829597473145	26.2309894561768	26.8302192687988	26.3447647094727	26.8550491333008	26.4481239318848				6	6	6	44,4	44,4	44,4	19,794	0	323,31	9995500000	502	P19105;O14950;P29269;P24844;P24844-2	P19105;O14950;P29269;P24844	Myosin regulatory light chain 12A;Myosin regulatory light chain 12B;Myosin regulatory light polypeptide 9	MYL12A;MYL12B;MYL9
21.0607490539551	21.279634475708	21.4397983551025	21.864429473877	20.9466304779053	21.5561580657959	21.6431941986084	20.9134788513184	21.173526763916	21.2824840545654	21.6673774719238	21.1039123535156	23.3108520507813	21.6177425384521	23.0373344421387	21.3624801635742	21.2072830200195	21.5995960235596	21.2208423614502	21.1648826599121	21.2921867370605	21.1338005065918				2	2	2	11,1	11,1	11,1	29,884	0	131,78	254870000	75	O14972-2;O14972	O14972-2;O14972	Down syndrome critical region protein 3	DSCR3
21.8912525177002	22.6003742218018	21.8188648223877	21.7174530029297	21.4233264923096	22.1847705841064	22.093282699585	21.7634754180908	21.9413070678711	22.4128932952881	22.0480995178223	22.4967880249023	22.5284748077393	22.1659812927246	22.9359436035156	22.3224220275879	21.8183326721191	21.9614486694336	22.1243457794189	22.5798721313477	22.0836601257324	22.4489326477051				2	2	2	2,9	2,9	2,9	109,1	0	19,529	353090000	53	O14974-4;O14974-3;O14974-2;O14974;O14974-5	O14974-4;O14974-3;O14974-2;O14974;O14974-5	Protein phosphatase 1 regulatory subunit 12A	PPP1R12A
27.4502258300781	27.4046993255615	27.3298454284668	27.287878036499	27.2077503204346	27.4547576904297	27.4670734405518	27.3357563018799	27.2324047088623	27.188268661499	27.3249607086182	27.3969287872314	27.5237064361572	27.4358062744141	27.4812030792236	27.1336517333984	27.3961868286133	27.371301651001	27.4656162261963	27.4204483032227	27.3247623443604	27.6347198486328				25	25	25	34,7	34,7	34,7	123,38	0	323,31	19481000000	1408	O14980	O14980	Exportin-1	XPO1
23.3829536437988	23.7616939544678	23.1627731323242	23.6905212402344	23.6507759094238	24.1233501434326	23.8408622741699	23.5895080566406	22.9583930969238	23.6412563323975	23.357666015625	23.421199798584	22.8426189422607	23.7060794830322	22.8628921508789	23.6129627227783	23.9710731506348	23.7515487670898	23.1748790740967	23.822509765625	23.2700805664063	24.0006790161133				24	18	18	15,1	12,4	12,4	271,32	0	86,587	1474900000	292	O15020;O15020-2	O15020;O15020-2	Spectrin beta chain, non-erythrocytic 2	SPTBN2
22.6792163848877	21.5543575286865	22.8490734100342	22.5672340393066	22.6727180480957	21.8624210357666	21.9070510864258	21.9838981628418	22.6759910583496	NaN	22.1177806854248	22.2824020385742	22.3937339782715	22.359094619751	22.9162540435791	21.8593044281006	21.688907623291	22.0648670196533	21.4362487792969	21.6724090576172	22.8074798583984	22.5415573120117				8	8	8	13,5	13,5	13,5	118,29	0	97,328	387750000	87	O15042;O15042-2;O15042-3	O15042;O15042-2;O15042-3	U2 snRNP-associated SURP motif-containing protein	U2SURP
25.0529937744141	25.2491340637207	25.2401599884033	25.2487487792969	25.4383506774902	25.1359004974365	24.9439010620117	25.2135753631592	25.27858543396	25.3280506134033	25.3015899658203	25.2821159362793	25.3430976867676	25.3781890869141	25.7025566101074	25.707103729248	25.194185256958	25.278902053833	25.3776893615723	25.6219253540039	24.9411144256592	24.875883102417				9	9	9	20,8	20,8	20,8	82,223	0	79,221	4778000000	465	O15075;O15075-4;O15075-2;O15075-3	O15075;O15075-4;O15075-2	Serine/threonine-protein kinase DCLK1	DCLK1
24.8157901763916	24.5268840789795	24.2603015899658	24.4860057830811	24.3118705749512	24.8285503387451	24.5126495361328	24.0984420776367	23.9084815979004	23.9627418518066	22.8476619720459	24.1239624023438	24.2599430084229	24.7750186920166	24.4890041351318	24.4117374420166	24.8708953857422	24.8222064971924	24.4560050964355	24.6528739929199	24.5512752532959	24.693302154541				3	2	2	4,2	3,4	3,4	110,56	0	11,881	2298600000	83	O15083	O15083	ERC protein 2	ERC2
20.61865234375	20.3971767425537	21.0633087158203	20.1261596679688	20.28737449646	20.1777935028076	19.9199485778809	20.1357097625732	21.5522499084473	20.9597129821777	21.259313583374	20.4997825622559	21.70654296875	NaN	22.3533134460449	21.0569515228271	NaN	NaN	22.7645320892334	20.4222221374512	21.5383987426758	20.4044094085693				4	3	3	18,5	12,4	12,4	40,949	0	8,8416	161100000	71	O15143	O15143	Actin-related protein 2/3 complex subunit 1B	ARPC1B
21.3144569396973	21.6681900024414	22.1311302185059	20.9200534820557	21.6018447875977	22.0948371887207	21.2743148803711	21.4443111419678	21.1941986083984	21.4507083892822	21.7632827758789	21.1254005432129	NaN	21.3453845977783	22.3427486419678	21.7235908508301	21.7346076965332	21.7352085113525	21.8137512207031	21.5016212463379	21.6429214477539	22.5760059356689				5	5	5	18,7	18,7	18,7	34,333	0	7,4855	204230000	59	O15144	O15144	Actin-related protein 2/3 complex subunit 2	ARPC2
23.2738571166992	23.1812629699707	23.2779560089111	23.4212226867676	23.2934646606445	23.1774559020996	23.6267833709717	23.4378089904785	23.3009738922119	23.8596725463867	23.142261505127	23.6054668426514	22.6291809082031	22.7823390960693	23.2458763122559	23.3173065185547	23.3555908203125	22.0769920349121	23.3935813903809	23.3167381286621	22.835319519043	22.699800491333				2	2	2	13,5	13,5	13,5	20,546	0	24,253	1083400000	119	O15145	O15145	Actin-related protein 2/3 complex subunit 3	ARPC3
23.782075881958	23.4167823791504	24.3145408630371	23.3567790985107	23.788402557373	24.1183433532715	23.7001762390137	23.8467559814453	23.9279975891113	23.9305191040039	24.1416397094727	24.0766525268555	23.9659404754639	23.8706073760986	23.9034576416016	24.2474174499512	24.0611763000488	23.4794311523438	23.8703689575195	23.9402770996094	24.0420875549316	23.6962604522705				3	2	2	13,9	9,9	9,9	23,818	0	12,257	1151600000	55	O15173;O15173-2	O15173;O15173-2	Membrane-associated progesterone receptor component 2	PGRMC2
24.3598022460938	24.6413345336914	24.2157135009766	24.9275684356689	24.5098495483398	24.451078414917	24.5294303894043	24.4910678863525	23.9574432373047	24.4625644683838	24.5442199707031	25.1078910827637	24.4722919464111	24.9856052398682	24.7498817443848	24.6313362121582	25.2932891845703	24.4994945526123	24.8627700805664	24.9950275421143	24.7435073852539	24.7560501098633				2	2	2	13,5	13,5	13,5	25,704	0	14,226	3186900000	127	O15217	O15217	Glutathione S-transferase A4	GSTA4
25.0374298095703	24.4919567108154	25.3123626708984	24.3510551452637	25.2461128234863	25.0922412872314	25.0574417114258	24.8580665588379	25.1169242858887	24.8894844055176	25.9877471923828	24.5345268249512	25.4626541137695	25.0131912231445	25.3038482666016	24.9254035949707	25.6464939117432	24.796480178833	25.1963272094727	24.7135772705078	25.4130897521973	25.3833332061768				4	4	4	18,6	18,6	18,6	30,394	0	225,84	4183100000	217	O15260;O15260-2;O15260-3	O15260;O15260-2;O15260-3	Surfeit locus protein 4	SURF4
21.4218864440918	21.0418300628662	21.4453506469727	20.8684539794922	20.7427654266357	21.6310501098633	20.6275024414063	21.2267837524414	21.3513889312744	21.5690784454346	21.335901260376	20.7721538543701	20.7948722839355	21.8178539276123	20.357048034668	20.5632419586182	20.9435501098633	21.0985164642334	20.7888050079346	21.2449855804443	20.6652679443359	21.3975601196289				4	4	4	8,9	8,9	8,9	95,467	0	16,709	233220000	96	O15303	O15303	Metabotropic glutamate receptor 6	GRM6
23.2711448669434	23.2483425140381	22.9619235992432	23.6395626068115	23.5155143737793	23.3080978393555	23.484037399292	23.6124458312988	23.3218364715576	23.4680843353271	23.4370403289795	23.6143589019775	22.7432975769043	23.2243728637695	22.2942314147949	22.9392147064209	23.8733139038086	23.1217002868652	22.8842754364014	23.6813049316406	22.7021179199219	23.3093299865723				2	2	2	5,7	5,7	5,7	67,113	0	20,325	1173400000	187	O15354	O15354	Prosaposin receptor GPR37	GPR37
22.6573753356934	22.4805583953857	22.5799865722656	22.7355327606201	22.3840084075928	23.2470817565918	23.0610504150391	22.5171585083008	22.6337280273438	22.2657070159912	22.9015350341797	22.4602699279785	22.9719924926758	22.6591033935547	23.1968116760254	22.4365825653076	22.4167442321777	22.4379768371582	22.5968704223633	23.0044288635254	22.5306148529053	22.3373260498047				5	5	5	16,8	16,8	16,8	59,271	0	8,0677	716520000	121	O15355	O15355	Protein phosphatase 1G	PPM1G
24.8338260650635	24.6989135742188	25.0646705627441	24.7581748962402	24.8511085510254	24.8705253601074	24.6870212554932	24.6102828979492	24.7723331451416	24.9185886383057	24.69801902771	24.8205070495605	24.5785045623779	25.1020011901855	24.8653354644775	24.834716796875	24.6899566650391	25.0434894561768	24.9355411529541	24.739143371582	24.9729347229004	24.7444438934326				12	12	12	42,3	42,3	42,3	58,14	0	80,129	3382800000	502	O15371-2;O15371-3;O15371	O15371-2;O15371-3;O15371	Eukaryotic translation initiation factor 3 subunit D	EIF3D
21.4375381469727	21.3985862731934	NaN	22.4237194061279	21.852502822876	21.3054695129395	21.8411808013916	22.3204002380371	21.3481750488281	21.5923461914063	21.6274547576904	21.4090309143066	21.719274520874	21.7030735015869	22.131555557251	22.8400173187256	21.761833190918	22.1500244140625	21.6909885406494	21.8210678100586	21.6134014129639	21.5449180603027				4	4	4	20,2	20,2	20,2	39,93	0	26,651	255380000	57	O15372	O15372	Eukaryotic translation initiation factor 3 subunit H	EIF3H
25.3412647247314	25.5447864532471	25.1457233428955	25.8313961029053	25.397590637207	25.5329856872559	25.3242321014404	25.2545356750488	24.6618537902832	24.9086952209473	25.3595199584961	25.2857475280762	25.2228927612305	25.2860832214355	24.6225986480713	24.9973449707031	25.4701881408691	25.2382259368896	25.0254535675049	25.6263275146484	24.8167343139648	25.1109962463379				6	6	6	11,4	11,4	11,4	93,045	0	158,12	4511800000	389	O15394;O15394-2	O15394	Neural cell adhesion molecule 2	NCAM2
22.912712097168	22.9222202301025	24.02952003479	23.0490303039551	22.9598217010498	22.7125301361084	22.742115020752	22.3895568847656	23.0454444885254	22.8173503875732	22.5703315734863	22.6228656768799	22.9106979370117	22.6600456237793	22.347785949707	22.4243850708008	22.9447555541992	23.2133960723877	22.8332042694092	22.9145812988281	22.3263893127441	23.4696006774902				4	4	4	28	28	28	27,4	0	41,728	642450000	66	O15400-2;O15400	O15400-2;O15400	Syntaxin-7	STX7
22.9608478546143	23.3345623016357	23.3121013641357	23.4526672363281	23.576831817627	23.442943572998	22.8417282104492	22.8235473632813	23.6215229034424	23.483283996582	22.9127464294434	23.5189628601074	23.5798034667969	23.126615524292	23.349100112915	23.261043548584	22.9828643798828	23.0011539459229	23.3667984008789	23.2404670715332	23.8743591308594	23.3972511291504				3	3	3	17,7	17,7	17,7	22,417	0	10,179	1209500000	129	O15498;O15498-2	O15498;O15498-2	Synaptobrevin homolog YKT6	YKT6
23.3500232696533	22.9786148071289	23.2188110351563	22.5653171539307	23.3747329711914	22.7399826049805	22.5946807861328	22.80344581604	23.6927795410156	23.3690624237061	23.5512008666992	22.6796112060547	23.8638954162598	23.290699005127	24.025691986084	23.4438400268555	22.9448871612549	23.207592010498	24.0723743438721	23.1476535797119	23.7657604217529	22.6625099182129				3	3	3	35,8	35,8	35,8	16,32	0	28,816	862850000	134	O15511;O15511-2	O15511;O15511-2	Actin-related protein 2/3 complex subunit 5	ARPC5
28.3868045806885	28.523509979248	28.5131206512451	28.5182685852051	28.5661735534668	28.5913734436035	28.7118225097656	28.4510917663574	28.3670768737793	28.323263168335	28.3074913024902	28.4713745117188	27.7854843139648	28.514196395874	27.1867542266846	28.0975742340088	28.4156150817871	28.6145915985107	27.9449577331543	28.477367401123	27.8948936462402	28.3450546264648				6	6	6	30,8	30,8	30,8	25,592	0	323,31	38501000000	509	O15537	O15537	Retinoschisin	RS1
23.4805526733398	23.7436485290527	24.1492023468018	23.6473045349121	23.689432144165	23.5983829498291	23.5048942565918	23.7799186706543	23.4260864257813	23.5411815643311	23.7774887084961	23.7387828826904	23.40456199646	23.5614967346191	23.3057117462158	23.4024085998535	23.2181854248047	23.0041484832764	23.7051582336426	23.6296005249023	23.81201171875	23.6197052001953				4	4	4	34,1	34,1	34,1	14,889	0	13,836	1385000000	169	O15540;O15540-2	O15540;O15540-2	Fatty acid-binding protein, brain	FABP7
29.5427646636963	28.992431640625	29.9734001159668	29.6611576080322	30.0022945404053	29.5580406188965	29.9744625091553	30.2023811340332	29.4477767944336	29.8596687316895	29.7107353210449	29.6515350341797	29.734790802002	30.001106262207	28.3800735473633	29.8877601623535	30.0012264251709	29.9221858978271	28.5342769622803	29.6931781768799	29.3287887573242	29.5971088409424				8	8	8	21,6	21,6	21,6	39,026	0	286,23	102300000000	710	O18766;P08100	O18766
24.673225402832	24.5278415679932	24.4703407287598	24.3460083007813	24.585132598877	24.6852684020996	24.629035949707	24.5190696716309	24.587947845459	24.6643619537354	24.4022026062012	24.4997615814209	23.874382019043	24.6782398223877	23.9339599609375	24.2852172851563	24.7111129760742	24.0755348205566	24.3182811737061	24.6098442077637	24.176815032959	24.3808574676514				10	10	7	19,5	19,5	14,7	96,117	0	44,258	2710200000	323	O18868;Q14721	O18868;Q14721	Potassium voltage-gated channel subfamily B member 1	KCNB1
27.5533008575439	27.6527328491211	27.930591583252	27.7505645751953	27.8929100036621	27.7960052490234	27.8353614807129	27.7137279510498	27.6434631347656	27.5647716522217	27.7027149200439	27.7140045166016	27.4837093353271	27.7962970733643	27.2931785583496	27.5734405517578	27.7143478393555	27.8470134735107	27.5555381774902	27.8828792572021	27.4973564147949	27.7088508605957				9	9	9	37,6	37,6	37,6	36,116	0	108,58	24695000000	970	O19069;O19069-1;P53597	O19069;O19069-1
26.0471839904785	26.0891590118408	26.3250198364258	26.1193141937256	26.0360088348389	26.1337890625	25.9354076385498	25.9908294677734	26.2684745788574	25.9406051635742	26.1255760192871	26.3622817993164	26.3945045471191	26.2964820861816	26.2332496643066	26.370532989502	26.0459499359131	26.1932792663574	26.1702251434326	26.2064075469971	26.3530006408691	26.2799835205078				16	16	16	28,4	28,4	28,4	90,932	0	133,78	8430600000	524	O43143	O43143	Pre-mRNA-splicing factor ATP-dependent RNA helicase DHX15	DHX15
22.8364849090576	22.5584659576416	22.8041000366211	22.5837345123291	22.3663120269775	22.4579181671143	22.7494354248047	22.3205471038818	22.4660091400146	22.200475692749	22.6759719848633	22.8538208007813	22.3657474517822	22.9387245178223	22.5633144378662	22.4148941040039	23.0421085357666	22.5958881378174	22.7785015106201	22.7175979614258	23.1798362731934	23.1360969543457				6	6	6	17,2	17,2	17,2	54,843	0	19,781	711790000	171	O43148;O43148-2	O43148;O43148-2	mRNA cap guanine-N7 methyltransferase	RNMT
21.447208404541	21.4191570281982	21.0306911468506	21.9975051879883	21.7754039764404	21.6819248199463	21.4273872375488	21.4373016357422	21.2029933929443	21.0909595489502	21.4107723236084	20.99928855896	21.5342845916748	22.0034332275391	22.3786239624023	21.1729202270508	21.6320877075195	21.661169052124	21.3320960998535	21.412525177002	21.2923164367676	21.192455291748				7	7	5	9,4	9,4	8,2	106,98	0	20,304	253550000	76	O43150-2;O43150	O43150-2;O43150	Arf-GAP with SH3 domain, ANK repeat and PH domain-containing protein 2	ASAP2
22.8223495483398	23.4136295318604	23.1769790649414	22.8992977142334	23.2316303253174	23.4540252685547	23.6476745605469	23.1883544921875	22.4960746765137	22.9413299560547	23.3274173736572	23.0046691894531	22.5276947021484	23.2855644226074	23.4046783447266	23.0370292663574	22.583122253418	23.0316543579102	23.0374870300293	22.7905044555664	23.0784702301025	22.8582763671875				6	6	6	17,1	17,1	17,1	58,32	0	11,86	771330000	116	O43172-2;O43172	O43172-2;O43172	U4/U6 small nuclear ribonucleoprotein Prp4	PRPF4
27.0957794189453	26.6927032470703	25.9675903320313	26.4964752197266	26.821044921875	26.7545299530029	26.9177570343018	26.6884002685547	26.5973014831543	26.3010330200195	26.6639041900635	26.6396427154541	26.7249431610107	26.2894859313965	26.3079299926758	26.6408252716064	26.6629981994629	26.6261386871338	26.364143371582	26.4343376159668	26.8016586303711	26.6229953765869				3	3	3	20	20	20	20,108	0	36,002	11751000000	182	O43181	O43181	NADH dehydrogenase [ubiquinone] iron-sulfur protein 4, mitochondrial	NDUFS4
23.3974857330322	23.6414470672607	22.9818019866943	22.9875907897949	23.678897857666	23.0540084838867	23.4193115234375	23.1000385284424	22.6659526824951	23.4355125427246	23.3110103607178	23.6178588867188	23.0981616973877	23.3985862731934	23.1876564025879	23.3527889251709	24.0142822265625	23.6417846679688	23.1780567169189	23.2429084777832	23.085729598999	23.3409309387207				2	2	2	6	6	6	32,261	0	4,2092	811900000	69	O43186	O43186	Cone-rod homeobox protein	CRX
23.4874153137207	23.4071750640869	23.1460285186768	23.4652080535889	23.4074897766113	23.0449371337891	23.0009231567383	23.3354587554932	22.7902889251709	23.0341930389404	23.5445766448975	23.2910213470459	22.8387336730957	23.600528717041	22.2077522277832	22.8338928222656	23.4764423370361	23.1476554870605	22.4463348388672	22.9816131591797	22.9419384002686	23.3325347900391				2	2	2	10,9	10,9	10,9	38,542	0	67,472	1079600000	168	O43236-5;O43236-2;O43236-3;O43236;O43236-4	O43236-5;O43236-2;O43236-3;O43236;O43236-4	Septin-4	SEPT4
23.5376853942871	22.6913833618164	23.3434143066406	23.092098236084	23.2732601165771	22.4735717773438	23.4564895629883	22.7272491455078	23.3086280822754	23.1147747039795	23.3159351348877	23.4780120849609	24.4730644226074	22.9101829528809	23.2452754974365	23.380298614502	23.6301879882813	22.7850742340088	23.2337837219238	22.9185409545898	23.2632503509521	23.0961284637451				6	5	5	26,2	23,6	23,6	54,099	0	67,469	963320000	95	O43237;O43237-2	O43237;O43237-2	Cytoplasmic dynein 1 light intermediate chain 2	DYNC1LI2
24.9601516723633	25.0019359588623	24.860767364502	24.9584922790527	24.7012195587158	25.0284786224365	25.0878524780273	25.0143756866455	24.8188018798828	24.7062549591064	25.0518760681152	25.2449836730957	25.3415241241455	24.8517951965332	25.0929641723633	24.5899963378906	25.5627460479736	24.6565437316895	25.2125015258789	24.7936248779297	25.1582145690918	25.0637016296387				6	6	6	14,8	14,8	14,8	60,977	0	39,579	3801400000	214	O43242;O43242-2	O43242;O43242-2	26S proteasome non-ATPase regulatory subunit 3	PSMD3
22.7285823822021	22.8643112182617	22.8123588562012	22.7877368927002	22.7582893371582	22.6247100830078	23.7016582489014	22.7670078277588	22.9900417327881	22.6760330200195	23.4652900695801	22.7277927398682	NaN	22.3798351287842	23.3743381500244	22.9507026672363	22.4011688232422	23.3139228820801	23.0650882720947	22.811803817749	23.3212738037109	22.98828125				3	3	3	8,5	8,5	8,5	70,832	0	16,155	399180000	56	O43252;O95340;O95340-2	O43252	Bifunctional 3-phosphoadenosine 5-phosphosulfate synthase 1;Sulfate adenylyltransferase;Adenylyl-sulfate kinase	PAPSS1
21.6254501342773	21.6758728027344	21.5185489654541	21.2940826416016	21.1497001647949	21.7769737243652	21.6613140106201	21.6822853088379	22.0680160522461	21.7067985534668	20.8443241119385	21.34326171875	21.9824504852295	21.2576942443848	21.6946067810059	21.7770328521729	21.3823986053467	21.4882049560547	21.6739597320557	22.2148571014404	21.9922504425049	21.5840263366699				2	2	2	3,3	3,3	3,3	76,806	0	11,793	289600000	95	O43264-2;O43264	O43264-2;O43264	Centromere/kinetochore protein zw10 homolog	ZW10
22.8078460693359	22.5846576690674	22.3580360412598	22.0152244567871	22.4930953979492	22.6082649230957	22.8208084106445	21.9090003967285	22.0643653869629	22.2528266906738	22.445671081543	22.2569694519043	22.3428230285645	22.2975578308105	22.5692024230957	22.5331687927246	22.4741153717041	22.4490795135498	22.5070724487305	22.5320262908936	22.7613830566406	21.6183433532715				5	5	5	10,6	10,6	10,6	90,254	0	59,228	469100000	68	O43290	O43290	U4/U6.U5 tri-snRNP-associated protein 1	SART1
26.9860801696777	27.0066509246826	26.8237648010254	27.0431003570557	26.7788467407227	26.946475982666	26.9062747955322	27.048921585083	26.5136394500732	26.5993213653564	26.652759552002	26.6326904296875	26.2262306213379	26.689079284668	26.211254119873	26.4221878051758	26.9463024139404	26.8350524902344	26.2625408172607	26.7719650268555	26.4448585510254	26.7174491882324				14	14	13	29,2	29,2	27,4	74,977	0	323,31	12323000000	553	O43301	O43301	Heat shock 70 kDa protein 12A	HSPA12A
25.9063301086426	26.31787109375	26.2371253967285	25.9521389007568	26.0908527374268	26.1427803039551	26.1531295776367	26.2275981903076	25.8992252349854	26.1198043823242	26.1665420532227	26.376407623291	26.0658264160156	26.1638298034668	26.0270729064941	26.0642890930176	26.1457023620605	26.0269584655762	26.0645561218262	26.0669059753418	26.1318397521973	26.0785427093506				10	10	9	48,3	48,3	45	39,124	0	140,78	8110600000	721	O43347	O43347	RNA-binding protein Musashi homolog 1	MSI1
27.9311828613281	27.9976711273193	27.8016300201416	27.8705196380615	27.8970203399658	28.066837310791	27.8287734985352	27.8819217681885	27.7986888885498	27.8762893676758	27.9595146179199	28.0194892883301	27.9567928314209	27.884952545166	27.8449897766113	27.9483470916748	27.7790718078613	27.8706645965576	27.8341979980469	27.9053611755371	28.0501327514648	28.102367401123				21	21	2	37	37	2,8	70,942	0	323,31	27786000000	1241	O43390;O43390-3	O43390;O43390-3	Heterogeneous nuclear ribonucleoprotein R	HNRNPR
22.0452194213867	22.3240699768066	22.3166694641113	22.1974086761475	22.0274391174316	22.5670795440674	22.0929794311523	22.6139373779297	22.6422271728516	22.2607936859131	22.1640701293945	22.3781814575195	22.6168670654297	22.5338764190674	22.1373291015625	21.9358139038086	22.304479598999	21.9179630279541	21.8579769134521	22.8842506408691	22.7100658416748	22.2621212005615				6	6	3	17,7	17,7	7,9	77,528	0	21,841	516070000	139	O43395	O43395	U4/U6 small nuclear ribonucleoprotein Prp3	PRPF3
26.7753849029541	26.7293014526367	26.703067779541	26.658821105957	26.5816059112549	26.5859031677246	26.7413768768311	26.8808746337891	26.694881439209	26.7423477172852	26.6691207885742	26.5792961120605	26.5186710357666	26.5509071350098	26.779167175293	26.6762542724609	26.5928916931152	26.5345554351807	26.7695808410645	26.6060314178467	26.7012252807617	26.548864364624				6	6	6	36,7	36,7	36,7	32,251	0	74,287	11843000000	509	O43396	O43396	Thioredoxin-like protein 1	TXNL1
25.4459533691406	25.7175025939941	25.5692253112793	25.7989673614502	25.6978607177734	25.5751438140869	25.5224704742432	25.7260551452637	25.1177005767822	25.5894889831543	25.3850402832031	25.6921691894531	25.3513603210449	25.6999626159668	25.3906631469727	25.1048107147217	25.977180480957	25.4134216308594	25.1709041595459	25.629093170166	25.4968299865723	25.8691291809082				10	10	10	11,5	11,5	11,5	143,25	0	124,57	5626300000	512	O43426-4;O43426-2;O43426;O43426-5	O43426-4;O43426-2;O43426;O43426-5	Synaptojanin-1	SYNJ1
21.8740825653076	22.0079441070557	22.5517024993896	22.1963291168213	21.6954250335693	22.4252395629883	22.6492614746094	22.1000671386719	21.6195125579834	22.2171096801758	22.1094169616699	21.638801574707	22.2146110534668	21.8526515960693	22.1425437927246	22.1564903259277	21.95534324646	22.1271667480469	21.89501953125	21.9894371032715	21.5637512207031	21.7591934204102				3	3	3	13,4	13,4	13,4	41,21	0	8,526	421120000	138	O43427-2;O43427	O43427-2;O43427	Acidic fibroblast growth factor intracellular-binding protein	FIBP
22.2382373809814	22.2761993408203	22.5857372283936	22.5464553833008	22.2884540557861	22.8616104125977	22.4507923126221	22.2869453430176	21.9846477508545	22.5551223754883	22.2453899383545	22.3759841918945	22.8051013946533	22.6457786560059	22.4915390014648	22.4115600585938	22.757999420166	22.2472591400146	22.3239440917969	22.747428894043	22.5179805755615	22.3345966339111				7	6	6	7,4	6,4	6,4	146,87	0	12,951	580910000	168	O43432-4;O43432;O43432-3	O43432-4;O43432;O43432-3	Eukaryotic translation initiation factor 4 gamma 3	EIF4G3
23.3463859558105	22.9645137786865	23.2154312133789	23.2160549163818	23.5649013519287	23.3909454345703	23.5869808197021	22.7443408966064	23.1429824829102	23.1012687683105	23.4962139129639	23.5358123779297	23.3877029418945	22.9744510650635	23.439510345459	23.3491878509521	23.1318607330322	23.0094089508057	23.0842323303223	23.1015567779541	23.2736072540283	23.2590522766113				5	5	5	43,5	43,5	43,5	19,208	0	15,874	1046100000	175	O43447;O43447-2	O43447;O43447-2	Peptidyl-prolyl cis-trans isomerase H	PPIH
28.9820327758789	29.06813621521	28.909351348877	28.7593669891357	29.0093193054199	28.9461708068848	29.0493106842041	28.751163482666	28.9930953979492	28.834358215332	29.0113754272461	29.0127658843994	28.8105182647705	28.927490234375	28.935619354248	28.8560600280762	28.9423027038574	28.8769950866699	28.967098236084	28.8661499023438	29.1096305847168	28.8829231262207				15	12	12	20,5	17,6	17,6	112,59	0	323,31	57903000000	1247	O43491;O43491-3;O43491-4;O43491-2	O43491;O43491-3;O43491-4;O43491-2	Band 4.1-like protein 2	EPB41L2
24.8466567993164	24.3950862884521	23.7003955841064	24.4327125549316	24.7260265350342	24.2614250183105	24.4324417114258	24.4292869567871	24.4439430236816	24.5083999633789	24.2868671417236	24.7725200653076	24.6612586975098	24.5413513183594	24.5419616699219	24.439079284668	24.6569919586182	24.5295791625977	24.2636127471924	24.2646236419678	24.2498664855957	23.8507194519043				4	4	4	85,7	85,7	85,7	9,6138	0	288,07	2566700000	282	Q66X52;O43504	Q66X52;O43504	Ragulator complex protein LAMTOR5	LAMTOR5
23.14426612854	23.2365379333496	23.8406639099121	23.3082752227783	24.0085220336914	23.4562473297119	23.1512699127197	23.5712833404541	23.5196685791016	23.4109668731689	22.8725395202637	22.4860305786133	23.0223808288574	23.346040725708	23.3351192474365	23.3233737945557	23.4590072631836	23.1152992248535	23.2425975799561	23.5050773620605	23.0722675323486	23.027229309082				3	3	3	19,7	19,7	19,7	22,092	0	13,39	1183600000	171	O43583	O43583	Density-regulated protein	DENR
21.63623046875	21.8419017791748	21.6737098693848	21.9908714294434	21.5870304107666	21.7145347595215	21.9382076263428	20.7937488555908	21.3936405181885	NaN	21.6648559570313	21.1343307495117	22.4979915618896	22.1179504394531	22.2421531677246	21.5069160461426	22.2357139587402	21.7603778839111	21.940975189209	22.1599311828613	22.3359527587891	21.6260871887207				5	5	5	7,6	7,6	7,6	109,96	0	9,1837	337550000	86	O43592	O43592	Exportin-T	XPOT
23.7019233703613	23.3384609222412	23.428150177002	23.4635009765625	23.248233795166	23.8082714080811	23.6059017181396	23.4809455871582	22.8958263397217	23.4819221496582	23.4408702850342	23.4334754943848	23.8518886566162	23.3243923187256	22.9739875793457	23.7478694915771	23.6884422302246	23.6637668609619	23.5820331573486	23.209846496582	23.454948425293	23.3226928710938				4	4	4	11,9	11,9	11,9	51,355	0	32,229	1235000000	166	O43615	O43615	Mitochondrial import inner membrane translocase subunit TIM44	TIMM44
22.7789649963379	23.4235973358154	23.2851486206055	23.2137680053711	23.0043621063232	22.8593616485596	23.1027698516846	23.1582813262939	22.7744655609131	22.7788066864014	22.7195510864258	22.8049907684326	21.8031749725342	22.8758811950684	22.5556507110596	22.6853256225586	23.1285820007324	22.7240371704102	23.0587596893311	23.397554397583	22.701696395874	22.8417205810547				3	3	3	22,2	22,2	22,2	20,274	0	7,6772	853420000	130	O43617;O43617-2	O43617;O43617-2	Trafficking protein particle complex subunit 3	TRAPPC3
23.5503482818604	23.5611019134521	23.5899791717529	23.5786323547363	23.8531513214111	23.6874771118164	23.7893047332764	23.8538055419922	24.0457725524902	23.8970260620117	23.6567916870117	23.5565376281738	23.8165016174316	23.8403663635254	23.765157699585	23.735746383667	23.6240768432617	23.4020462036133	23.8972816467285	23.6803436279297	23.4137420654297	23.3366565704346				4	4	4	13,5	13,5	13,5	56,289	0	54,81	1555500000	252	O43660-2;O43660	O43660-2;O43660	Pleiotropic regulator 1	PLRG1
21.3314552307129	20.6225337982178	20.634916305542	21.6435127258301	21.336051940918	20.1597137451172	20.50146484375	21.1445064544678	20.945707321167	21.2909774780273	20.4710998535156	21.257640838623	20.2285995483398	21.1909999847412	20.9551849365234	20.5419483184814	20.625789642334	20.2409782409668	20.0061855316162	20.4130973815918	20.5512313842773	20.814847946167				3	3	3	9,1	9,1	9,1	49,692	0	5,2212	159990000	86	O43670-2;O43670;O43670-4;O43670-3	O43670-2;O43670;O43670-4	BUB3-interacting and GLEBS motif-containing protein ZNF207	ZNF207
24.2856884002686	24.1277256011963	24.4231472015381	24.3582038879395	24.3092613220215	24.7228565216064	24.5504341125488	24.3378849029541	25.0066738128662	24.3534259796143	23.7747077941895	24.2885932922363	18.4279594421387	23.9271087646484	23.1438732147217	23.5451717376709	23.9433650970459	24.034086227417	22.5982570648193	24.3154392242432	23.440954208374	23.5341548919678				2	2	2	14,5	14,5	14,5	8,4908	0,00030257	3,7216	1473700000	61	O43678-2;O43678	O43678-2;O43678	NADH dehydrogenase [ubiquinone] 1 alpha subcomplex subunit 2	NDUFA2
27.1227798461914	27.1257228851318	26.7425861358643	27.2590179443359	27.1313228607178	27.1613502502441	27.1948223114014	26.9963970184326	26.9477863311768	26.9682712554932	27.0813083648682	26.9911346435547	26.8257064819336	27.064245223999	27.0302085876465	27.1079292297363	27.042366027832	27.0896797180176	27.0622825622559	27.0252857208252	27.1609725952148	26.9327259063721				9	9	9	49,1	49,1	49,1	38,792	0	138,97	15468000000	721	O43681	O43681	ATPase ASNA1	ASNA1
24.3467979431152	24.5056209564209	24.9329681396484	24.5700302124023	24.2506408691406	24.570405960083	24.2271690368652	24.615701675415	24.2406997680664	24.3542938232422	24.0391044616699	24.342679977417	23.9402465820313	24.4997024536133	24.196891784668	24.2656879425049	24.0401287078857	24.1800632476807	24.1119575500488	24.4070701599121	24.3949108123779	24.6191635131836				5	5	5	24,2	24,2	24,2	36,954	0	49,712	2439000000	261	O43684-2;O43684	O43684-2;O43684	Mitotic checkpoint protein BUB3	BUB3
29.0612659454346	28.981912612915	28.9957580566406	29.0462093353271	29.1943893432617	29.0845699310303	29.032621383667	28.9111366271973	29.2301273345947	28.9910621643066	29.0378932952881	28.97438621521	29.4720249176025	29.1448497772217	29.6242752075195	29.4470176696777	29.056755065918	29.0724220275879	29.5890846252441	29.2860374450684	29.5615329742432	29.132848739624				37	37	23	53,8	53,8	35,1	104,85	0	323,31	67432000000	2377	O43707;O43707-2;O43707-3	O43707;O43707-2	Alpha-actinin-4	ACTN4
24.9670143127441	25.0090732574463	24.6963787078857	25.2115497589111	25.115608215332	25.0267295837402	25.2976016998291	25.2566375732422	24.9994945526123	24.6560497283936	25.0235900878906	24.8460884094238	25.3147430419922	25.2204246520996	25.1885299682617	24.8642845153809	25.27685546875	24.9597969055176	25.0624179840088	25.0796127319336	25.019702911377	24.7253456115723				10	10	10	21,7	21,7	21,7	91,35	0	176,68	4121900000	570	O43747;O43747-2	O43747;O43747-2	AP-1 complex subunit gamma-1	AP1G1
21.3452701568604	21.4078979492188	21.0490646362305	21.8856525421143	NaN	NaN	21.0521850585938	21.2075290679932	20.9889144897461	NaN	22.8494777679443	22.6075191497803	NaN	20.5540313720703	21.5914306640625	20.9751167297363	21.216438293457	21.1974849700928	21.2954120635986	21.0530490875244	20.5989151000977	22.0543098449707				2	2	2	8,3	8,3	8,3	34,063	0,0023835	2,3421	81920000	22	O43765	O43765	Small glutamine-rich tetratricopeptide repeat-containing protein alpha	SGTA
24.5121040344238	24.2821044921875	24.6077117919922	23.9441318511963	24.1667137145996	24.3165397644043	24.3113765716553	23.9559688568115	24.274845123291	24.7961158752441	24.6489486694336	24.7776660919189	24.3355255126953	24.6036586761475	24.5104484558105	24.4108963012695	24.5349159240723	24.1564197540283	24.7719345092773	24.6102466583252	24.5676364898682	24.208869934082				3	3	2	36,4	36,4	27,3	13,361	0	19,972	2513100000	139	P68211;O43768-6;O43768-5;O43768-2;O43768;O43768-9;O43768-7;O43768-3;O43768-4;O43768-8	P68211;O43768-6;O43768-5;O43768-2;O43768;O43768-9;O43768-7;O43768-3;O43768-4	Alpha-endosulfine	ENSA
26.0077972412109	26.01149559021	25.9662456512451	26.0497665405273	25.9635448455811	26.083423614502	26.2555065155029	26.1964130401611	26.0017700195313	26.0181922912598	26.1914768218994	25.9732093811035	26.2113914489746	26.0821933746338	26.3998908996582	26.2392272949219	26.1590805053711	26.0389747619629	26.1588973999023	26.1673641204834	26.215991973877	26.0488681793213				9	9	9	22,4	22,4	22,4	62,942	0	247,35	8095400000	684	O43776;O43776-2	O43776	Asparagine--tRNA ligase, cytoplasmic	NARS
22.7743186950684	22.4740905761719	22.6129131317139	22.4351596832275	22.6239833831787	22.3322982788086	22.961067199707	22.5752296447754	22.6986999511719	22.849365234375	22.3861560821533	23.4081439971924	21.8467636108398	22.5980491638184	22.6096725463867	22.2846164703369	22.8527851104736	22.0679607391357	22.4867286682129	22.6553573608398	22.6399269104004	22.585636138916				5	5	5	6,4	6,4	6,4	131,98	0	16,728	671390000	102	O43795;O43795-2;Q9UBC5	O43795;O43795-2	Unconventional myosin-Ib	MYO1B
25.1341419219971	25.4684562683105	25.4512004852295	25.5230522155762	25.256233215332	25.5693874359131	25.4532623291016	25.4883594512939	24.7441654205322	25.0688095092773	25.2524471282959	25.3471813201904	24.9724922180176	25.4211711883545	25.339075088501	25.0410461425781	25.1164245605469	25.5666961669922	25.2216396331787	25.4333457946777	25.5042114257813	25.5593605041504				7	7	7	40,1	40,1	40,1	26,227	0	73,692	4588700000	290	O43809	O43809	Cleavage and polyadenylation specificity factor subunit 5	NUDT21
22.6840972900391	22.4540348052979	22.7299213409424	23.2217864990234	22.9037837982178	22.7756175994873	23.2636222839355	22.8539257049561	23.0271396636963	23.3560562133789	23.0275821685791	23.0755252838135	23.5017642974854	22.5775318145752	22.9358711242676	22.7077922821045	22.8746585845947	22.7215995788574	23.204797744751	23.3425769805908	23.3432865142822	23.2112197875977				9	9	9	21,4	21,4	21,4	86,131	0	102,16	894010000	159	O43815;O43815-2	O43815;O43815-2	Striatin	STRN
20.6564598083496	21.5641002655029	20.7839202880859	20.6497402191162	20.5354919433594	20.8172035217285	20.8875789642334	20.4122352600098	19.8880310058594	21.1639232635498	20.2175102233887	19.5178394317627	21.6810302734375	20.684757232666	21.6101360321045	21.4129600524902	20.936990737915	21.3487091064453	21.2662811279297	20.4420108795166	21.0075817108154	21.1916980743408				3	3	3	13,8	13,8	13,8	46,36	0	26,883	152170000	70	O43826;O43826-2	O43826;O43826-2	Glucose-6-phosphate translocase	SLC37A4
27.1040954589844	27.1311702728271	27.166820526123	27.2455825805664	27.1320190429688	27.0866107940674	27.2513656616211	27.0291023254395	26.9892463684082	26.8596210479736	26.6738052368164	26.9316940307617	26.4712448120117	26.9478797912598	26.6073379516602	26.9134979248047	26.9290885925293	27.1600456237793	26.8006954193115	27.0735416412354	26.8614273071289	27.0419216156006				8	8	7	24,7	24,7	19,7	42,183	0	297,73	14826000000	537	O43837;O43837-2;O43837-3	O43837;O43837-2;O43837-3	Isocitrate dehydrogenase [NAD] subunit beta, mitochondrial	IDH3B
27.9440383911133	27.9424457550049	27.4158687591553	27.6411609649658	27.8103256225586	27.7848701477051	27.6332187652588	27.6122875213623	27.9768943786621	27.7566375732422	27.9227962493896	27.7817096710205	28.2445583343506	27.6439380645752	28.3992195129395	28.0977611541748	27.7218055725098	27.8757400512695	28.2564067840576	27.6841735839844	28.3689460754395	28.1724815368652				11	11	11	44,8	44,8	44,8	37,106	0	323,31	27916000000	1102	O43852;O43852-3;O43852-6;O43852-5;O43852-10;O43852-2;O43852-4;O43852-15;O43852-13;O43852-14;O43852-9;O43852-11;O43852-8;O43852-12;O43852-7	O43852;O43852-3;O43852-6;O43852-5;O43852-10;O43852-2;O43852-4;O43852-15	Calumenin	CALU
25.1381053924561	24.5637722015381	24.6226043701172	24.7215480804443	24.7564086914063	24.9101085662842	24.8986759185791	24.2299060821533	25.1840763092041	24.6632385253906	25.0237312316895	24.3003787994385	24.4734172821045	24.5535526275635	24.2883911132813	25.0546245574951	24.4917964935303	24.8634338378906	24.9179420471191	24.8653221130371	24.510425567627	24.5203323364258				12	7	7	30,6	19,8	19,8	58,951	0	149,09	3214700000	192	O43865;O43865-2	O43865;O43865-2	Putative adenosylhomocysteinase 2	AHCYL1
26.1109237670898	26.1773357391357	26.0159301757813	26.0707778930664	26.0816211700439	26.3087730407715	26.2529850006104	26.0620460510254	26.0043830871582	25.7977485656738	26.1091117858887	26.3180503845215	26.3187236785889	26.1760578155518	26.2690086364746	26.0146579742432	26.0137901306152	25.9524536132813	25.79860496521	26.3225250244141	26.0510101318359	25.9744243621826				3	3	3	25,3	25,3	25,3	17,42	0	70,372	8108500000	253	O43924	O43924	Retinal rod rhodopsin-sensitive cGMP 3,5-cyclic phosphodiesterase subunit delta	PDE6D
26.8450241088867	26.3434791564941	26.5415687561035	26.8796424865723	26.5608520507813	26.5230178833008	26.8121738433838	27.1694793701172	26.8265190124512	26.6683311462402	26.9480724334717	26.8435344696045	26.3136615753174	26.7761077880859	26.3701553344727	26.9429054260254	27.0581321716309	26.8911514282227	26.6015892028809	26.9788932800293	26.2530288696289	27.0345859527588				10	10	10	46,9	46,9	46,9	35,613	0	60,023	13028000000	399	O46560	O46560
24.11279296875	24.4007606506348	24.076171875	24.4696197509766	24.1040878295898	24.5047378540039	24.1315879821777	23.8333225250244	24.290189743042	23.5417404174805	24.3599281311035	23.9673805236816	24.0556335449219	24.3190727233887	24.0761089324951	24.1342468261719	24.0725574493408	24.3342742919922	24.085355758667	24.147668838501	24.2068290710449	24.1941089630127				11	11	11	27,4	27,4	27,4	71,689	0	46,797	2114400000	315	O60216;Q9H4I0	O60216	Double-strand-break repair protein rad21 homolog	RAD21
21.041316986084	21.4753875732422	20.9536666870117	20.8679351806641	21.7725601196289	21.6686305999756	20.7746963500977	20.9778099060059	21.4247798919678	21.1915664672852	21.2028255462646	21.1031856536865	20.0499534606934	20.734167098999	20.2400169372559	20.6037349700928	20.8918895721436	20.9240131378174	21.4088306427002	20.7745056152344	20.4182014465332	21.2339401245117				2	2	2	3,2	3,2	3,2	116,07	0	27,469	185010000	105	O60245;O60245-2	O60245;O60245-2	Protocadherin-7	PCDH7
23.895866394043	23.8348121643066	24.2134284973145	24.2136383056641	23.7857074737549	24.03782081604	24.3615455627441	24.1971836090088	24.4709854125977	23.9253234863281	24.5198669433594	24.157693862915	23.8342933654785	24.1745738983154	24.2635688781738	24.0250205993652	24.4577922821045	24.0321159362793	24.1722946166992	24.1698932647705	24.1179370880127	24.2333068847656				7	6	6	27,1	23,3	23,3	40,925	0	44,884	2081700000	238	O60256;O60256-3;O60256-2;O60256-4	O60256;O60256-3;O60256-2;O60256-4	Phosphoribosyl pyrophosphate synthase-associated protein 2	PRPSAP2
24.1061611175537	24.4523468017578	24.2676658630371	23.7716808319092	24.1930465698242	24.0883769989014	23.8846664428711	24.0717887878418	24.239709854126	24.0502796173096	24.1520290374756	24.0770778656006	24.1612949371338	24.1116981506348	24.0444679260254	24.092924118042	23.9253044128418	23.8617496490479	24.3516960144043	24.1980590820313	24.4934883117676	24.1550636291504				9	9	8	10,4	10,4	9,5	121,9	0	53,269	2033800000	249	O60264	O60264	SWI/SNF-related matrix-associated actin-dependent regulator of chromatin subfamily A member 5	SMARCA5
20.6723670959473	21.1154289245605	19.901237487793	20.4258365631104	20.4785251617432	20.6371116638184	22.1819839477539	20.03883934021	21.2490463256836	20.3674430847168	20.4781303405762	20.7385711669922	20.0020961761475	20.8402271270752	19.154224395752	NaN	20.6330738067627	20.3068580627441	20.3357086181641	20.806640625	19.853385925293	19.7884902954102				2	2	2	6,6	6,6	6,6	46,638	0,00029248	3,3043	69147000	35	O60268;O60268-3;O60268-2	O60268;O60268-3;O60268-2	Uncharacterized protein KIAA0513	KIAA0513
23.4088153839111	22.7021427154541	23.1314525604248	23.0162181854248	23.0866813659668	22.9469871520996	23.2729320526123	23.3193244934082	22.8803977966309	22.3118495941162	23.2203674316406	23.248929977417	22.8455429077148	23.1139240264893	23.5890502929688	23.6279258728027	23.2840156555176	23.3982582092285	23.1403465270996	23.0659065246582	23.2113285064697	22.9320888519287				10	10	10	12,9	12,9	12,9	144,68	0	217,86	992850000	149	O60271-4;O60271;O60271-9;O60271-2;O60271-5;O60271-3	O60271-4;O60271;O60271-9;O60271-2;O60271-5;O60271-3	C-Jun-amino-terminal kinase-interacting protein 4	SPAG9
25.5272254943848	25.6320419311523	25.5359401702881	25.6359062194824	25.5708236694336	25.6172580718994	25.5829372406006	25.3794231414795	25.4462242126465	25.4555854797363	25.3731079101563	25.4374332427979	25.2112007141113	25.4259815216064	25.2774486541748	25.3311290740967	25.5955429077148	25.6703910827637	25.6189384460449	25.6791229248047	25.3883094787598	25.3906135559082				16	11	9	24,9	17,2	14,2	109,49	0	283,39	5221900000	614	O60282;O60282-2	O60282;O60282-2	Kinesin heavy chain isoform 5C	KIF5C
21.6828956604004	21.6749057769775	20.7794456481934	21.713924407959	21.4569187164307	21.1762313842773	21.6515426635742	21.4769115447998	21.5286197662354	21.3381328582764	21.5053386688232	21.9345588684082	21.5099620819092	21.1434097290039	21.8029537200928	22.0280303955078	21.2985229492188	21.2789268493652	21.7044124603271	22.0444641113281	21.7539806365967	21.6092491149902				4	4	4	4,3	4,3	4,3	171,29	0	25,966	257420000	90	O60306	O60306	Intron-binding protein aquarius	AQR
26.488109588623	26.2679405212402	26.1386489868164	26.5400066375732	26.2011299133301	26.1530227661133	26.3028984069824	26.4171180725098	26.3089714050293	26.0080699920654	26.0841789245605	26.3365879058838	25.609935760498	25.7714672088623	25.5560703277588	26.2225189208984	26.2377910614014	26.2381439208984	26.0096492767334	26.4168663024902	26.19118309021	26.5246849060059				15	15	15	23,7	23,7	23,7	107,57	0	121,26	8897500000	545	O60313-13;O60313;O60313-9;O60313-11;O60313-2;O60313-10	O60313-13;O60313;O60313-9;O60313-11;O60313-2;O60313-10	Dynamin-like 120 kDa protein, mitochondrial;Dynamin-like 120 kDa protein, form S1	OPA1
21.3581695556641	21.4752330780029	21.5836296081543	21.5243606567383	21.7938690185547	21.7663345336914	21.8531532287598	21.7198257446289	21.1855525970459	21.5364284515381	21.6534938812256	21.63623046875	22.1970825195313	21.9215126037598	21.6355991363525	22.1311378479004	21.6607208251953	21.1744613647461	21.6489868164063	21.2728595733643	22.4755611419678	21.4257392883301				8	4	4	6,9	3,7	3,7	199,26	0	38,083	315450000	133	O60333-2;O60333;O60333-4;O60333-3	O60333-2;O60333;O60333-4;O60333-3	Kinesin-like protein KIF1B	KIF1B
22.8827457427979	23.1169624328613	22.8524284362793	23.0861911773682	23.0773086547852	23.0302600860596	22.9230918884277	22.9063529968262	22.9149494171143	23.1846866607666	22.7009868621826	22.9554653167725	22.8266639709473	22.5881996154785	23.3960514068604	22.6696701049805	23.1312866210938	23.1080017089844	22.9089126586914	23.0332775115967	23.4356822967529	22.6827507019043				10	10	10	25,1	25,1	25,1	92,902	0	48,001	955830000	235	O60341;O60341-2	O60341;O60341-2	Lysine-specific histone demethylase 1A	KDM1A
24.1688995361328	24.3580207824707	24.2826709747314	24.2857627868652	24.1676979064941	24.2171669006348	24.2295150756836	23.9377059936523	24.0405044555664	23.9326133728027	24.3559226989746	24.4257678985596	24.3028335571289	24.0942440032959	24.2791404724121	24.2548789978027	23.6062431335449	24.2617244720459	24.1127433776855	24.1186370849609	24.445858001709	24.0129890441895				4	4	4	42	42	42	18,762	0	64,357	2134600000	216	O60493;O60493-2;O60493-4;O60493-3	O60493;O60493-2;O60493-4;O60493-3	Sorting nexin-3	SNX3
23.5540084838867	23.4025192260742	23.3194942474365	23.5403537750244	23.2846641540527	23.5604476928711	23.1903953552246	23.2965888977051	23.3946399688721	23.3897819519043	23.3507957458496	23.4145908355713	23.7335472106934	23.3428134918213	23.5555992126465	23.4221000671387	23.6017303466797	23.0421409606934	23.9953956604004	23.5836734771729	23.5863418579102	23.0711078643799				12	12	12	20,9	20,9	20,9	102,91	0	45,108	1323100000	356	O60502;O60502-4;O60502-2;O60502-3	O60502;O60502-4;O60502-2;O60502-3	Protein O-GlcNAcase	MGEA5
27.3310012817383	27.2335052490234	27.1238746643066	27.3567733764648	27.3480663299561	27.4219837188721	27.3288383483887	27.2042427062988	27.2189807891846	27.1192779541016	27.2976703643799	27.2426567077637	27.6825332641602	27.4580841064453	27.3980903625488	27.3920459747314	27.3053073883057	27.379035949707	27.3994846343994	27.3203067779541	27.5163326263428	27.2528495788574				17	12	12	36,8	29,1	29,1	69,602	0	323,31	18932000000	1040	O60506;O60506-3;O60506-2;O60506-4;O60506-5	O60506;O60506-3;O60506-2;O60506-4;O60506-5	Heterogeneous nuclear ribonucleoprotein Q	SYNCRIP
19.963809967041	20.5614185333252	NaN	20.2728710174561	20.7376861572266	21.0908756256104	20.39306640625	20.4779586791992	20.6971912384033	NaN	21.0163192749023	20.6518478393555	20.8883476257324	20.3056335449219	20.7268714904785	NaN	19.8151111602783	NaN	20.3757400512695	20.5486793518066	20.9523372650146	20.1343650817871				4	4	4	9,7	9,7	9,7	65,521	0	5,9457	60527000	38	O60508	O60508	Pre-mRNA-processing factor 17	CDC40
20.8561630249023	20.7119617462158	21.3700752258301	21.0966262817383	20.377082824707	21.536735534668	21.4974098205566	21.1451950073242	21.0685615539551	19.9243659973145	21.2251148223877	NaN	NaN	20.8848705291748	21.1790676116943	20.8653259277344	20.6357326507568	21.5123519897461	21.1862831115723	20.4306316375732	21.7637310028076	21.1868171691895				7	5	5	8,1	6,4	6,4	124,71	0	9,1064	101680000	22	O60518	O60518	Ran-binding protein 6	RANBP6
22.2662887573242	22.2527332305908	22.3764209747314	22.0884647369385	22.429895401001	22.0463962554932	21.9411334991455	22.3753986358643	21.9060840606689	23.3688659667969	22.3969497680664	22.4750308990479	21.6353511810303	22.3539714813232	22.1557693481445	21.6880912780762	22.1137351989746	22.4335327148438	22.3165550231934	22.5394897460938	22.3277893066406	22.0008277893066				3	3	3	15,5	15,5	15,5	39,053	0	11,098	478750000	109	O60547-2;O60547	O60547-2;O60547	GDP-mannose 4,6 dehydratase	GMDS
20.4010372161865	20.5132579803467	20.7908229827881	20.5235157012939	20.1335353851318	20.3997497558594	20.9790878295898	20.6598052978516	20.9716415405273	21.3400764465332	21.3375225067139	20.5658264160156	20.8876247406006	20.7025566101074	21.1787452697754	21.6717472076416	21.5429267883301	21.2253856658936	20.724006652832	20.6920146942139	21.2451038360596	20.6344032287598				6	6	6	6,4	6,4	6,4	141,35	0	108,99	148080000	99	O60610;O60610-2;O60610-3	O60610;O60610-2;O60610-3	Protein diaphanous homolog 1	DIAPH1
27.7381725311279	27.7614917755127	27.6084461212158	27.8359527587891	27.6201801300049	27.9116706848145	27.8233509063721	27.7644233703613	27.3672676086426	27.9231452941895	27.5453071594238	27.8442478179932	27.0689907073975	27.7387886047363	26.9863719940186	27.4160060882568	27.7378387451172	27.6444320678711	27.164379119873	27.8143272399902	27.3855533599854	27.8106346130371				11	11	9	17,8	17,8	15,5	89,655	0	246,23	24165000000	541	O60641-4;O60641;O60641-3;O60641-2	O60641-4;O60641;O60641-3	Clathrin coat assembly protein AP180	SNAP91
21.1447124481201	20.56764793396	20.3343677520752	21.0803279876709	20.6767520904541	20.8965110778809	20.1519470214844	20.3558406829834	21.3692455291748	NaN	21.3893642425537	21.2304744720459	20.6479644775391	NaN	21.35569190979	20.9696750640869	20.797492980957	21.0367202758789	21.2060165405273	21.3903732299805	22.0018882751465	20.9512958526611				7	7	7	19,4	19,4	19,4	55,023	0	20,655	140110000	79	O60701;O60701-2;O60701-3	O60701;O60701-2;O60701-3	UDP-glucose 6-dehydrogenase	UGDH
24.2714176177979	23.9850959777832	24.0190200805664	24.362886428833	24.417106628418	24.2327651977539	24.293062210083	23.6840286254883	24.5512199401855	23.7971801757813	24.5438938140869	24.230978012085	24.8371505737305	24.2591991424561	25.0085964202881	24.7132530212402	24.4609527587891	23.946044921875	25.0718765258789	24.0007381439209	24.7197685241699	24.4145088195801				10	10	10	17,9	17,9	17,9	108,17	0	96,7	2493000000	353	O60716;O60716-17;O60716-2;O60716-4;O60716-6;O60716-3;O60716-5;O60716-7;O60716-9;O60716-8;O60716-10;O60716-12;O60716-14;O60716-11;O60716-13;O60716-15;O60716-18;O60716-16;O60716-20;O60716-22;O60716-19;O60716-21;O60716-23;O60716-24;O60716-31;O60716-25;O60716-26;O60716-28;O60716-30;O60716-27;O60716-29;O60716-32	O60716;O60716-17;O60716-2;O60716-4;O60716-6;O60716-3;O60716-5;O60716-7;O60716-9;O60716-8;O60716-10;O60716-12;O60716-14;O60716-11;O60716-13;O60716-15;O60716-18;O60716-16;O60716-20;O60716-22;O60716-19;O60716-21;O60716-23;O60716-24;O60716-31;O60716-25;O60716-26;O60716-28;O60716-30;O60716-27;O60716-29;O60716-32	Catenin delta-1	CTNND1
24.5581359863281	24.1841831207275	24.5554809570313	24.4121971130371	24.4492168426514	24.5184841156006	24.4522838592529	23.9655208587646	24.3151817321777	24.1014366149902	24.2908668518066	24.5027885437012	23.9598293304443	24.787935256958	24.2250595092773	24.3044738769531	24.3517532348633	24.2717704772949	24.1135311126709	24.2349128723145	23.9579296112061	24.0000553131104				7	7	5	13,9	13,9	10,3	98,795	0	48,495	2387300000	187	O60741;Q9Y3Q4	O60741	Potassium/sodium hyperpolarization-activated cyclic nucleotide-gated channel 1	HCN1
22.8443737030029	22.8681907653809	22.462423324585	22.8681316375732	22.7330112457275	22.9464683532715	23.0658588409424	22.1974411010742	22.7199554443359	23.0413551330566	22.5936126708984	22.3860149383545	22.8318347930908	22.9891777038574	23.1504211425781	23.028923034668	22.7990093231201	22.9149894714355	23.1771507263184	22.3870449066162	23.2153930664063	22.6017913818359				3	2	2	9,5	7	7	46,097	0	148,76	677700000	82	O60749-2;O60749	O60749-2;O60749	Sorting nexin-2	SNX2
25.4638366699219	25.4582901000977	25.3271083831787	25.4261131286621	25.6267509460449	25.3377361297607	25.6231155395508	25.4674682617188	25.7712821960449	25.5569801330566	25.4094467163086	25.4187850952148	25.5747261047363	25.5304412841797	25.5951023101807	25.372428894043	25.6402397155762	25.5113563537598	25.6053218841553	25.4527645111084	25.54026222229	25.4949817657471				12	12	12	20	20	20	107,89	0	308,17	5353900000	523	O60763;O60763-2	O60763;O60763-2	General vesicular transport factor p115	USO1
24.3072032928467	24.3264617919922	24.0152492523193	24.5524826049805	24.2263164520264	24.1317539215088	24.4170684814453	24.1607322692871	24.1311912536621	24.6913375854492	23.9985198974609	24.5058307647705	24.5875129699707	24.0289573669434	24.5826835632324	24.0240135192871	24.5497493743896	24.4897689819336	24.4606971740723	24.2691879272461	24.4749908447266	24.9610977172852				7	7	7	18,9	18,9	18,9	53,818	0	89,001	2449700000	232	O60784;O60784-2;O60784-4;O60784-3	O60784;O60784-2;O60784-4;O60784-3	Target of Myb protein 1	TOM1
23.1594619750977	23.5240497589111	23.1644535064697	23.2772216796875	23.212121963501	23.2712631225586	23.2913722991943	23.1388778686523	23.2667140960693	23.2308826446533	23.4983615875244	23.5128078460693	23.1060638427734	21.0081958770752	22.8072071075439	23.1968460083008	22.4521560668945	23.085376739502	22.7374153137207	22.7357025146484	23.1939125061035	23.6980285644531				7	2	2	47,6	7,9	7,9	13,952	0	10,026	1059400000	155	Q99880;Q99879;Q99877;Q93079;Q5QNW6;P62807;P58876;P57053;O60814;Q5QNW6-2;Q96A08;A0A2R8Y619	Q99880;Q99879;Q99877;Q93079;Q5QNW6;P62807;P58876;P57053;O60814;Q5QNW6-2;Q96A08	Histone H2B type 1-L;Histone H2B type 1-M;Histone H2B type 1-N;Histone H2B type 1-H;Histone H2B type 2-F;Histone H2B type 1-C/E/F/G/I;Histone H2B type 1-D;Histone H2B type F-S;Histone H2B type 1-K;Histone H2B type 1-A	HIST1H2BL;HIST1H2BM;HIST1H2BN;HIST1H2BH;HIST2H2BF;HIST1H2BC;HIST1H2BD;H2BFS;HIST1H2BK;HIST1H2BA
22.4632225036621	22.1496315002441	22.5387115478516	22.2310791015625	21.9401245117188	21.9308567047119	22.0981006622314	21.8754901885986	21.7431926727295	21.2796630859375	21.9142532348633	21.8454818725586	22.4943370819092	22.2166385650635	22.1088180541992	22.9004364013672	22.1875705718994	22.3251495361328	22.7547283172607	22.6045665740967	22.658353805542	22.1963596343994				4	4	4	9,7	9,7	9,7	70,755	0	65,251	374320000	73	O60826	O60826	Coiled-coil domain-containing protein 22	CCDC22
22.6504154205322	23.1250114440918	23.0364398956299	22.620002746582	22.9857025146484	22.890697479248	22.5935878753662	22.8953952789307	20.8155612945557	22.5687389373779	22.8580913543701	22.4846839904785	23.0193328857422	22.433385848999	23.4420413970947	23.198917388916	22.8901138305664	22.9119186401367	22.9536533355713	23.0505638122559	22.8629627227783	22.9869232177734				2	2	2	26,7	26,7	26,7	18,706	0	20,792	741080000	137	O60828-5;O60828-4;O60828-2;O60828;O60828-10;O60828-9;O60828-8;O60828-7;O60828-6;O60828-3	O60828-5;O60828-4;O60828-2;O60828;O60828-10;O60828-9;O60828-8;O60828-7;O60828-6;O60828-3	Polyglutamine-binding protein 1	PQBP1
25.3577194213867	25.6400508880615	25.4856414794922	25.8500518798828	25.8336620330811	25.9300765991211	25.8013591766357	25.7428817749023	25.5529174804688	25.5920009613037	25.5686626434326	25.7490653991699	25.6554508209229	25.9138526916504	25.4359264373779	25.5855464935303	25.7317237854004	25.5481739044189	25.2524948120117	25.9431610107422	25.8681373596191	25.8135032653809				2	2	2	16,3	16,3	16,3	19,258	0	310,11	5847600000	187	O60831	O60831	PRA1 family protein 2	PRAF2
23.9045314788818	23.3428325653076	23.880485534668	23.5034828186035	23.3677673339844	23.5240917205811	23.8549003601074	23.4092330932617	23.1139640808105	24.1284999847412	23.2980842590332	23.4563751220703	23.4495620727539	23.4362258911133	23.4024639129639	23.3555145263672	23.4525356292725	22.9469966888428	23.3667793273926	23.4450836181641	23.3349876403809	23.4815044403076				4	4	4	17,6	17,6	17,6	47,602	0	10,289	1423400000	150	O60832-2;O60832	O60832-2;O60832	H/ACA ribonucleoprotein complex subunit 4	DKC1
22.8800144195557	23.0077209472656	23.2580108642578	23.143180847168	22.8676528930664	22.9092979431152	23.0471019744873	23.3728828430176	23.259428024292	23.3121242523193	23.7454986572266	22.4673252105713	22.3298797607422	23.1086082458496	24.078239440918	23.4341430664063	23.3337841033936	23.4193801879883	23.5936279296875	23.1322135925293	23.5674667358398	23.0290336608887				8	8	8	10,2	10,2	10,2	138,83	0	41,579	1141400000	221	O60841	O60841	Eukaryotic translation initiation factor 5B	EIF5B
21.924840927124	21.665699005127	21.7073516845703	21.5977058410645	21.7046031951904	21.5744438171387	21.5296783447266	21.7729682922363	22.0159397125244	21.8855419158936	21.8133907318115	21.8959503173828	21.9331932067871	21.8403034210205	21.451732635498	22.0982971191406	21.3970546722412	21.8290958404541	21.3957271575928	21.4451751708984	21.6276054382324	21.8125171661377				2	2	2	19,4	19,4	19,4	15,48	0	4,0737	370120000	98	O60869-2;O60869-3;O60869	O60869-2;O60869-3;O60869	Endothelial differentiation-related factor 1	EDF1
26.3075904846191	26.2366886138916	26.2421436309814	26.2307052612305	26.2464904785156	26.234130859375	26.3624801635742	26.0676212310791	26.1247634887695	25.9607677459717	26.1507244110107	25.8995475769043	26.569694519043	26.1205539703369	26.1827545166016	26.1474533081055	26.1883449554443	26.287389755249	26.196117401123	26.3256759643555	26.2189483642578	26.2274303436279				7	7	7	24,5	24,5	24,5	45,745	0	172,53	8799600000	556	O60884	O60884	DnaJ homolog subfamily A member 2	DNAJA2
25.2779502868652	24.7439155578613	24.767858505249	24.5587730407715	25.0082492828369	24.3859825134277	25.0113716125488	24.8773040771484	25.3092746734619	24.8745460510254	25.4547252655029	24.7772827148438	25.2082214355469	24.8721294403076	25.7287921905518	25.9078598022461	25.3585548400879	25.0427055358887	25.4057998657227	24.8876399993896	25.420316696167	24.8654975891113				4	4	4	8,1	8,1	8,1	53,962	0	15,374	4075600000	200	O62787	O62787
23.3343296051025	22.7346935272217	24.4673080444336	23.3785152435303	23.4660568237305	23.3783836364746	23.7091388702393	23.8008766174316	23.7568092346191	23.5465126037598	24.2377948760986	23.4303741455078	27.0221309661865	22.6806354522705	24.566577911377	24.8223114013672	22.9529094696045	23.1746025085449	23.3033561706543	23.2126617431641	24.528377532959	23.2332878112793				9	9	8	32,4	32,4	28,8	59,771	0	34,691	2033500000	258	O62839	O62839
21.3463840484619	21.3258323669434	21.5692367553711	21.7497959136963	21.4880542755127	21.6074047088623	21.7382431030273	21.1361217498779	21.3736610412598	21.1029453277588	22.0945568084717	21.5628547668457	21.8805313110352	21.6699466705322	22.0946960449219	21.4690856933594	22.5494976043701	21.3809261322021	21.5568828582764	21.0370445251465	21.1410865783691	21.0446720123291				2	2	2	4,2	4,2	4,2	82,768	0	68,953	322910000	88	O75027-2;O75027;O75027-3	O75027-2;O75027;O75027-3	ATP-binding cassette sub-family B member 7, mitochondrial	ABCB7
21.9312934875488	21.8772048950195	22.486665725708	21.1521949768066	21.4533729553223	21.6654739379883	21.7608470916748	21.8960514068604	21.5825538635254	21.8752956390381	21.7416191101074	21.8639736175537	22.397159576416	21.9138698577881	21.7891807556152	22.7354621887207	21.4712791442871	21.8399982452393	22.642749786377	21.6548767089844	21.8509864807129	22.0979843139648				3	3	2	3,9	3,9	2,9	124,3	0	5,6475	404270000	84	O75038-2;O75038-4;O75038-3;O75038;O75038-5	O75038-2;O75038-4;O75038-3;O75038	1-phosphatidylinositol 4,5-bisphosphate phosphodiesterase eta-2	PLCH2
24.9989757537842	25.0409660339355	24.3937129974365	25.0583896636963	24.9573287963867	25.2150764465332	24.9658126831055	24.8215293884277	24.7607154846191	25.0724506378174	25.111047744751	25.3280544281006	24.337329864502	25.3047733306885	24.1627712249756	24.8049049377441	24.9997959136963	25.066707611084	24.5493583679199	25.1414680480957	24.2282943725586	24.8606414794922				11	11	11	15	15	15	99,995	0	70,324	3542300000	378	O75061;O75061-4;O75061-2;O75061-3	O75061;O75061-4;O75061-2	Putative tyrosine-protein phosphatase auxilin	DNAJC6
27.4646644592285	27.5468769073486	27.2885284423828	27.62424659729	27.767053604126	27.6006507873535	27.5034427642822	27.6011524200439	27.5457305908203	27.5228424072266	27.3544807434082	27.4546566009521	27.7872619628906	27.388599395752	27.6093597412109	27.6579265594482	27.5849647521973	27.5734844207764	27.639404296875	27.6147022247314	27.5128631591797	27.6502647399902				10	10	10	33,8	33,8	33,8	66,193	0	323,31	22080000000	992	O75083;O75083-3	O75083;O75083-3	WD repeat-containing protein 1	WDR1
24.310510635376	24.2189788818359	24.0186462402344	24.4557056427002	23.8146591186523	24.1864776611328	23.9315357208252	24.3408985137939	24.1692886352539	24.5343284606934	24.0826797485352	24.6296100616455	23.7094860076904	24.5502319335938	23.741886138916	24.1008567810059	24.310661315918	24.2451095581055	24.073392868042	24.210075378418	23.8742427825928	24.4626045227051				18	15	2	18,4	16,4	2,5	165,85	0	100,13	2136400000	475	O75122-3	O75122-3	CLIP-associating protein 2	CLASP2
22.4944610595703	22.483341217041	22.6912460327148	22.4422454833984	22.6500282287598	22.929292678833	22.9126167297363	22.9223785400391	23.3395099639893	22.4804954528809	23.0423965454102	22.9839401245117	22.4701652526855	22.9644317626953	23.0930519104004	23.1179275512695	22.5648441314697	23.1236438751221	22.9759941101074	22.9998207092285	22.5174617767334	23.5850868225098				3	2	2	8,6	6,9	6,9	60,13	0	15,02	669380000	97	O75131;Q86YQ8-2;Q9HCH3-2;Q8IYJ1;Q9UBL6-2;Q86YQ8;Q9HCH3;Q9UBL6	O75131	Copine-3	CPNE3
22.2833824157715	22.012882232666	21.8277893066406	21.2041320800781	21.9875679016113	22.9581432342529	22.7245388031006	22.3946933746338	22.1504402160645	22.0810699462891	21.7497730255127	22.3795108795166	21.5922241210938	22.0872421264648	23.5362567901611	21.1631240844727	22.5000896453857	21.7019309997559	21.4682464599609	22.0668754577637	22.1055908203125	22.5994606018066				10	10	8	12	12	9,8	133,49	0	12,701	420840000	103	O75145;O75145-2	O75145;O75145-2	Liprin-alpha-3	PPFIA3
22.0353012084961	21.2582168579102	21.6524562835693	21.583028793335	21.674388885498	21.5649280548096	21.6575679779053	21.7048263549805	21.1537170410156	21.2536525726318	22.1104431152344	21.6792011260986	21.9406185150146	21.5915756225586	22.2459945678711	21.6452655792236	21.7587394714355	21.4568481445313	21.7680969238281	21.588508605957	22.2989158630371	21.5527019500732				4	4	3	6,1	6,1	4,7	113,68	0	73,389	340940000	110	O75150;O75150-3;O75150-4	O75150;O75150-3;O75150-4	E3 ubiquitin-protein ligase BRE1B	RNF40
22.0074329376221	22.1188945770264	21.9781303405762	22.3122959136963	22.1057109832764	21.946310043335	21.9554767608643	22.530818939209	21.7566795349121	21.4850292205811	22.017650604248	22.4303188323975	NaN	22.3117256164551	21.5822429656982	21.9892826080322	22.3322849273682	22.3123550415039	21.9051761627197	22.2257900238037	22.125904083252	22.1955146789551				6	6	6	7,3	7,3	7,3	135,25	0	14,788	406000000	110	O75155;O75155-2	O75155;O75155-2	Cullin-associated NEDD8-dissociated protein 2	CAND2
22.518575668335	21.732479095459	22.6827697753906	22.0975131988525	21.6766014099121	22.4156284332275	21.7220878601074	21.5052814483643	21.869800567627	21.4888076782227	22.2943305969238	22.0763988494873	22.5117797851563	21.9242496490479	21.8430194854736	22.4350242614746	22.0596103668213	21.9249897003174	22.1185264587402	22.1395244598389	22.1666069030762	22.1801948547363				12	12	12	6,9	6,9	6,9	254,41	0	61,226	255130000	66	O75165	O75165	DnaJ homolog subfamily C member 13	DNAJC13
21.4019622802734	21.3653697967529	21.2174434661865	21.165168762207	21.4990844726563	21.5366134643555	21.1311435699463	22.1559085845947	21.4837341308594	21.5826358795166	22.0311965942383	21.6150379180908	21.6544742584229	21.2074069976807	21.8644733428955	21.8046035766602	21.4620895385742	21.1803302764893	21.4978618621826	NaN	21.4687652587891	21.4746685028076				3	3	3	6,9	6,9	6,9	81,871	0	10,288	202880000	62	O75175	O75175	CCR4-NOT transcription complex subunit 3	CNOT3
20.361349105835	20.0004463195801	20.6931934356689	20.7358703613281	20.2933330535889	20.6570358276367	20.6106910705566	20.8086433410645	20.6446475982666	20.179141998291	20.1967658996582	20.4758415222168	NaN	21.4783363342285	20.4343566894531	18.9341926574707	20.8499889373779	21.6001453399658	20.4472599029541	19.9726715087891	21.1245079040527	20.6549968719482				7	7	4	6,1	6,1	3,8	263,55	0	30,095	97429000	53	O75179-7;O75179-2;O75179;O75179-6;O75179-3;O75179-4;O75179-5	O75179-7;O75179-2;O75179;O75179-6;O75179-3;O75179-4	Ankyrin repeat domain-containing protein 17	ANKRD17
24.3621101379395	24.4124984741211	24.9173278808594	24.7227611541748	24.6864471435547	24.5798320770264	24.7439117431641	24.5423812866211	24.6437835693359	24.4515724182129	23.8809967041016	24.4883193969727	23.1690082550049	24.8826103210449	23.8154048919678	24.3591766357422	24.2225112915039	24.5723037719727	24.1590881347656	24.8499164581299	24.2298336029053	25.0463962554932				3	3	3	15,5	15,5	15,5	22,202	0	76,028	2410200000	114	O75251-2;O75251	O75251-2;O75251	NADH dehydrogenase [ubiquinone] iron-sulfur protein 7, mitochondrial	NDUFS7
25.1699085235596	25.0474987030029	25.1989078521729	25.5018558502197	25.1149196624756	25.2011947631836	25.3727626800537	25.1416854858398	25.5968627929688	25.022533416748	25.3343811035156	25.344654083252	25.2510070800781	25.0828514099121	24.5787963867188	25.2537155151367	25.0570850372314	25.1919250488281	25.2338256835938	25.2018585205078	25.1912021636963	25.2594375610352				9	9	9	27,8	27,8	27,8	51,851	0	59,435	4466300000	432	O75306-2;O75306	O75306-2;O75306	NADH dehydrogenase [ubiquinone] iron-sulfur protein 2, mitochondrial	NDUFS2
23.4039421081543	23.7795791625977	23.8628177642822	23.8784770965576	24.0267314910889	23.7613563537598	23.5970458984375	23.68337059021	23.6045532226563	23.4358081817627	23.7238540649414	23.2166633605957	22.9029426574707	23.5857429504395	22.7540626525879	23.2873802185059	23.5102558135986	23.6620788574219	23.252140045166	23.9283409118652	23.3057174682617	23.235221862793				2	2	2	10,5	10,5	10,5	33,742	0	12,838	1404400000	179	O75323	O75323	Protein NipSnap homolog 2	GBAS
22.2491512298584	22.3177604675293	22.3531341552734	22.3371315002441	22.4963111877441	22.1450214385986	21.6024875640869	22.1080455780029	22.0968265533447	22.0590057373047	21.793514251709	22.8145542144775	22.3384265899658	22.5529861450195	21.7646198272705	22.6804370880127	22.6022987365723	22.6346607208252	21.9652938842773	22.2354164123535	22.0864753723145	21.8964862823486				8	7	3	10,4	9,4	4,9	140,67	0	21,936	391340000	73	O75334-2;O75334-3;O75334;O75334-6;O75334-5;O75334-4;O75334-7;O75334-8	O75334-2;O75334-3;O75334;O75334-6;O75334-5;O75334-4;O75334-7;O75334-8	Liprin-alpha-2	PPFIA2
23.5707035064697	24.1027965545654	23.7582492828369	23.731990814209	23.7130470275879	23.867603302002	23.4927024841309	23.0594635009766	23.5942268371582	23.5448360443115	23.2602024078369	23.7962017059326	23.3216781616211	24.0732955932617	24.0552864074707	23.5834121704102	23.9038257598877	23.966625213623	23.5757369995117	23.7449645996094	23.7917709350586	23.9516334533691				3	3	3	18	18	18	21,664	0	16,522	1554100000	163	O75340-2;O75340	O75340-2;O75340	Programmed cell death protein 6	PDCD6
24.2283477783203	23.9117050170898	23.8556880950928	24.5831699371338	24.3485641479492	24.3902931213379	24.3042278289795	24.3227100372314	23.9501667022705	24.1527729034424	23.8498382568359	23.9463729858398	23.6244659423828	23.122859954834	24.0766143798828	24.0880374908447	23.8027591705322	23.6790313720703	24.2619132995605	24.0555000305176	23.7799224853516	24.0733947753906				4	2	2	30,5	16,9	16,9	13,757	0	22,27	1283100000	66	O75348	O75348	V-type proton ATPase subunit G 1	ATP6V1G1
22.7111740112305	22.1360855102539	21.8807430267334	21.4997863769531	21.681468963623	21.6148643493652	21.3579216003418	21.4031925201416	21.6821060180664	22.06298828125	22.4526138305664	22.924825668335	22.9637584686279	21.7434463500977	22.8317966461182	22.3772430419922	21.8262786865234	21.4462089538574	22.6091384887695	21.6341381072998	22.2642517089844	21.9011993408203				3	2	2	10,8	8,1	8,1	49,301	0	4,5896	385210000	66	O75351;Q6PIW4-2;Q6PIW4	O75351	Vacuolar protein sorting-associated protein 4B	VPS4B
29.5524349212646	29.7346992492676	29.5379219055176	29.7945079803467	29.5783424377441	29.465087890625	29.4075298309326	29.4838085174561	29.5130805969238	29.6271438598633	29.587911605835	29.4918155670166	29.5345935821533	29.6758785247803	29.2369937896729	29.3422203063965	29.5638008117676	29.524040222168	29.280086517334	29.4212188720703	29.5137939453125	29.4485511779785				14	14	12	52,7	52,7	45,7	39,617	0	323,31	91139000000	1953	O75367;O75367-3;O75367-2	O75367;O75367-3;O75367-2	Core histone macro-H2A.1	H2AFY
NaN	23.3943386077881	22.8627281188965	22.6768798828125	23.0849418640137	22.7131156921387	22.6396198272705	22.2552509307861	22.7678623199463	21.8259391784668	21.4514122009277	NaN	NaN	23.6411895751953	22.5947647094727	22.1477432250977	22.1667137145996	22.4674224853516	23.3792667388916	22.6962547302246	22.7494373321533	23.8728618621826				3	3	3	22,8	22,8	22,8	12,774	0	4,1956	395590000	42	O75368	O75368	SH3 domain-binding glutamic acid-rich-like protein	SH3BGRL
22.7244606018066	22.6090545654297	22.32057762146	23.0838928222656	23.5240745544434	22.4824771881104	22.6038227081299	22.561351776123	23.871265411377	22.5855960845947	22.8631057739258	22.0890827178955	24.7344131469727	23.2892208099365	24.8148441314697	25.0441017150879	23.1657543182373	23.7351016998291	24.7777004241943	23.3044567108154	24.6168384552002	23.2230129241943				26	22	22	19,4	17,1	17,1	275,66	0	215,99	1460400000	341	O75369-2;O75369-9;O75369;O75369-6;O75369-3;O75369-8;O75369-7;O75369-5;O75369-4	O75369-2;O75369-9;O75369;O75369-6;O75369-3;O75369-8;O75369-7;O75369-5;O75369-4	Filamin-B	FLNB
26.5500545501709	26.6560707092285	26.5910491943359	26.6099185943604	26.727746963501	26.4187355041504	26.4627513885498	26.3491859436035	26.5739364624023	26.6471767425537	26.6126766204834	26.731273651123	26.3543891906738	26.4351692199707	26.5168762207031	26.6062145233154	26.3872489929199	26.9343299865723	26.5787811279297	26.787425994873	26.6139602661133	26.703010559082				5	5	5	29,3	29,3	29,3	24,593	0	323,31	11288000000	472	O75396	O75396	Vesicle-trafficking protein SEC22b	SEC22B
25.8471164703369	25.8966217041016	25.5970897674561	25.475643157959	25.3248901367188	25.4708251953125	25.4503421783447	25.6268558502197	25.216983795166	25.5078010559082	25.566276550293	25.4611015319824	26.6810264587402	25.6606903076172	24.3350391387939	25.0148944854736	26.0721321105957	25.6207695007324	25.8788757324219	25.5561065673828	25.2894859313965	26.5041313171387				4	4	4	36	36	36	30,106	0	322,23	6287900000	218	Q2L969;O75431;O75431-2	Q2L969;O75431;O75431-2	Metaxin-2	MTX2
23.6049537658691	24.128719329834	24.4065551757813	23.5895938873291	23.647159576416	23.8879890441895	23.8289985656738	23.6136837005615	23.7360725402832	23.4494895935059	23.9692764282227	24.096040725708	23.3748397827148	24.1208648681641	23.4869956970215	23.8138809204102	23.4165744781494	23.5765285491943	23.7242965698242	24.1574745178223	23.8153800964355	24.1722087860107				6	6	5	26	26	23,9	38,169	0	55,196	1644800000	243	O75436;O75436-2	O75436;O75436-2	Vacuolar protein sorting-associated protein 26A	VPS26A
21.6390056610107	21.934154510498	21.3388175964355	21.6529846191406	21.811149597168	22.1551761627197	22.2817726135254	22.6436367034912	22.2008533477783	22.0974063873291	21.6488227844238	21.8424835205078	21.624303817749	21.790885925293	21.9801349639893	22.3265228271484	21.8755893707275	21.9778327941895	22.2974853515625	21.4994468688965	22.2803955078125	21.6010112762451				4	4	4	13,3	13,3	13,3	54,366	0	168,12	372120000	97	O75439	O75439	Mitochondrial-processing peptidase subunit beta	PMPCB
26.9142913818359	27.0181217193604	26.9399833679199	26.994312286377	27.0324287414551	27.0320072174072	27.1899681091309	27.1488647460938	27.0602722167969	26.4221572875977	26.7088966369629	26.9287242889404	27.0647792816162	26.9656276702881	26.6735172271729	26.5870552062988	26.7887496948242	26.9965705871582	26.3917102813721	26.8303279876709	26.9313697814941	27.0052661895752				9	9	8	21,1	21,1	19,6	60,103	0	323,31	14548000000	595	O75475;O75475-3;O75475-2	O75475;O75475-3;O75475-2	PC4 and SFRS1-interacting protein	PSIP1
27.5577907562256	27.5872001647949	27.4731292724609	27.636697769165	27.4484176635742	27.5341281890869	27.6025161743164	27.7589378356934	27.4169025421143	27.3626823425293	27.6175880432129	27.6254920959473	27.5505180358887	27.7103309631348	27.0481109619141	27.6572360992432	27.5458297729492	27.5971488952637	27.3768901824951	27.6083698272705	27.4248485565186	27.4886093139648				6	6	6	18,9	18,9	18,9	30,241	0	29,728	21534000000	469	O75489	O75489	NADH dehydrogenase [ubiquinone] iron-sulfur protein 3, mitochondrial	NDUFS3
22.3929843902588	NaN	23.1172103881836	22.8893985748291	NaN	22.7714080810547	19.2364444732666	22.3296012878418	22.7767181396484	22.4141979217529	21.4765453338623	22.6224708557129	22.4291687011719	22.8686561584473	22.4896335601807	22.3207702636719	22.9007434844971	22.3962326049805	23.1311626434326	22.6284275054932	22.3954467773438	22.4566059112549				3	3	3	23,6	23,6	23,6	20,117	0	6,5534	457250000	51	O75494-5;O75494-4;O75494-6;O75494-3;O75494-2;O75494;Q8WXF0	O75494-5;O75494-4;O75494-6;O75494-3;O75494-2;O75494	Serine/arginine-rich splicing factor 10	SRSF10
27.1242275238037	26.9921607971191	27.0310440063477	27.0534820556641	26.9607028961182	27.0914897918701	27.2291679382324	27.1066703796387	26.9378452301025	26.9977416992188	26.9998264312744	27.1134414672852	27.2363834381104	27.1306667327881	27.117057800293	27.1089897155762	27.1760101318359	27.0348339080811	27.047046661377	27.0084342956543	27.1462078094482	26.9813957214355				26	26	26	33,1	33,1	33,1	145,83	0	323,31	15788000000	1195	O75533;O75533-2	O75533	Splicing factor 3B subunit 1	SF3B1
24.1102027893066	24.3709278106689	24.3115119934082	24.5419292449951	24.4655113220215	24.4170894622803	24.5682888031006	24.2626647949219	24.2304191589355	24.2044563293457	24.1406497955322	24.1687965393066	24.3012237548828	24.0005950927734	24.1842269897461	24.2855205535889	24.4928436279297	24.5767478942871	24.3549289703369	24.3316345214844	24.3891296386719	24.2527732849121				6	6	6	12	12	12	85,746	0	323,31	2345400000	364	O75534-2;O75534;O75534-3;O75534-4	O75534-2;O75534;O75534-3;O75534-4	Cold shock domain-containing protein E1	CSDE1
25.3958358764648	24.7891063690186	24.8217487335205	25.3056297302246	24.9736976623535	25.2017288208008	25.1021919250488	25.1743850708008	25.1482486724854	25.3850288391113	25.2650203704834	25.2899990081787	24.1964416503906	24.5702018737793	24.8582897186279	24.5544700622559	25.3068771362305	24.7312393188477	24.7376804351807	25.0161933898926	24.5584144592285	24.7002277374268				7	7	7	38,9	38,9	38,9	31,635	0	18,809	3858700000	342	O75569-3;O75569-2;O75569	O75569-3;O75569-2;O75569	Interferon-inducible double-stranded RNA-dependent protein kinase activator A	PRKRA
22.8940734863281	23.0670547485352	23.5203895568848	23.1957931518555	23.0155181884766	23.2468318939209	23.0781593322754	22.8852424621582	23.134822845459	22.7780113220215	22.6533241271973	22.6672706604004	22.6632175445557	22.9875545501709	23.1884307861328	22.7162494659424	23.3561096191406	23.1450614929199	22.5434150695801	23.416576385498	22.9402027130127	23.2574424743652				6	6	6	12,6	12,6	12,6	89,864	0	17,203	783140000	143	O75582;O75582-3;O75582-2	O75582;O75582-3	Ribosomal protein S6 kinase alpha-5	RPS6KA5
25.1356391906738	25.3325881958008	24.8946113586426	26.0273895263672	25.4490203857422	25.3571796417236	25.2567443847656	25.3431816101074	24.9707012176514	24.938606262207	26.0324287414551	25.4261131286621	25.6283874511719	25.6426849365234	25.8203449249268	25.8618793487549	25.5759429931641	25.9537620544434	25.4432678222656	25.5602760314941	25.6518135070801	24.7343711853027				2	2	2	11,7	11,7	11,7	22,875	0	13,378	4734900000	82	O75608-2;O75608	O75608-2;O75608	Acyl-protein thioesterase 1	LYPLA1
26.8132419586182	26.8557739257813	26.8291435241699	26.6046314239502	26.7375583648682	26.834716796875	26.7909564971924	26.7138729095459	26.5967845916748	26.4968032836914	26.8072414398193	26.8130302429199	26.8631153106689	26.7916774749756	26.8536758422852	26.864725112915	26.7547454833984	26.7384777069092	26.7800388336182	26.7737655639648	26.9047050476074	26.7569541931152				39	39	39	25,3	25,3	25,3	244,5	0	323,31	12905000000	1390	O75643;O75643-2	O75643	U5 small nuclear ribonucleoprotein 200 kDa helicase	SNRNP200
24.6335029602051	24.5668468475342	24.5007286071777	24.5797080993652	24.3577423095703	24.5359878540039	24.5570755004883	24.5557250976563	24.410623550415	24.5095367431641	24.1272354125977	24.5566749572754	24.3550033569336	24.5717506408691	24.404956817627	24.3609275817871	24.792459487915	24.8920269012451	24.4902954101563	24.5569324493408	24.5239505767822	24.6625061035156				6	4	4	25	19,2	19,2	42,086	0	112,49	2717400000	223	O75688-4;O75688-2;O75688;O75688-5;O75688-3	O75688-4;O75688-2;O75688;O75688-5	Protein phosphatase 1B	PPM1B
22.3205738067627	22.6155853271484	22.6210613250732	22.3314838409424	22.5928363800049	23.1842041015625	22.1466827392578	22.8267688751221	22.7332229614258	22.5895099639893	22.5828800201416	21.6670036315918	22.5334167480469	22.2032432556152	22.6939754486084	22.0781211853027	23.0072002410889	22.7257251739502	22.9031524658203	22.2297115325928	22.6787395477295	22.3479423522949				11	11	11	12,8	12,8	12,8	149,01	0	77,658	706210000	184	O75694-2;O75694	O75694-2;O75694	Nuclear pore complex protein Nup155	NUP155
22.020694732666	21.8113346099854	21.8265590667725	22.4804878234863	23.1770210266113	21.9155387878418	22.9945373535156	NaN	22.3302192687988	21.9298515319824	22.2035312652588	22.5146102905273	22.4316062927246	21.7029056549072	22.0258865356445	22.9483852386475	21.7151508331299	22.8336486816406	22.1009483337402	21.8664627075195	22.0675277709961	22.1676406860352				2	2	2	3,4	3,4	3,4	39,641	0,0028796	2,248	220300000	26	O75695	O75695	Protein XRP2	RP2
27.4891338348389	27.5287475585938	27.8037300109863	27.540864944458	27.8066062927246	27.6301250457764	27.749418258667	27.6954193115234	27.4817581176758	27.4761028289795	27.4893932342529	27.6875591278076	27.0840950012207	27.4104995727539	27.0670204162598	27.3249015808105	27.6577053070068	27.6919460296631	27.474983215332	27.6759643554688	27.2963104248047	27.5528259277344				21	21	16	43,5	43,5	35,8	74,761	0	182,78	21661000000	979	O75746;O75746-2	O75746;O75746-2	Calcium-binding mitochondrial carrier protein Aralar1	SLC25A12
23.68212890625	23.2793292999268	23.3125953674316	23.275707244873	23.3268184661865	23.5345726013184	23.5068588256836	23.3999843597412	23.2051410675049	23.3920154571533	23.4584712982178	23.3453693389893	23.7942905426025	23.3983955383301	23.6323432922363	23.4831981658936	23.8696231842041	23.0314998626709	23.6221733093262	23.5589771270752	23.5455532073975	23.5597152709961				4	4	4	26,6	26,6	26,6	35,611	0	15,926	1341900000	254	O75821	O75821	Eukaryotic translation initiation factor 3 subunit G	EIF3G
24.8500289916992	24.85178565979	24.7379932403564	24.981632232666	24.7639484405518	25.3533744812012	24.8062896728516	24.3161506652832	24.5654964447021	24.455436706543	24.8962478637695	24.5923748016357	24.2596969604492	24.8173332214355	24.4595355987549	24.9039916992188	24.7947998046875	24.4931259155273	24.7718200683594	24.8560543060303	24.6358108520508	24.4573993682861				4	2	2	19,5	9	9	30,85	0	154	3200900000	123	O75828	O75828	Carbonyl reductase [NADPH] 3	CBR3
22.0949401855469	22.4055099487305	22.7552642822266	22.4778137207031	22.8444347381592	22.2389087677002	22.1304168701172	22.2086887359619	22.4944648742676	22.5557975769043	21.9354553222656	21.9514427185059	21.4573364257813	22.4700832366943	21.2626132965088	21.9395885467529	22.0916652679443	21.9684810638428	23.0201072692871	21.6120281219482	NaN	22.3974075317383				2	2	2	11,9	11,9	11,9	24,428	0	8,3888	420370000	79	O75832	O75832	26S proteasome non-ATPase regulatory subunit 10	PSMD10
21.6241302490234	21.864688873291	21.6310749053955	21.4889259338379	20.7549457550049	21.2422752380371	21.9093608856201	22.0618743896484	24.2551555633545	21.0913276672363	22.0641746520996	NaN	21.4235763549805	NaN	21.6623954772949	NaN	22.2063961029053	24.8188495635986	20.763370513916	22.6540699005127	20.4461822509766	22.6290321350098				3	3	3	8,4	8,4	8,4	54,812	0	79,233	218480000	20	O75844	O75844	CAAX prenyl protease 1 homolog	ZMPSTE24
26.3453960418701	26.4530029296875	26.3610000610352	26.4373550415039	26.5281791687012	26.345193862915	26.6013336181641	26.5471725463867	26.7038116455078	26.4174709320068	26.5184383392334	26.7174034118652	26.3272171020508	26.3783435821533	26.6677684783936	26.5350208282471	26.6439971923828	26.2595634460449	26.5628509521484	26.4212856292725	26.53542137146	26.4683895111084				10	9	9	25,4	23,2	23,2	46,659	0	187,25	10522000000	644	O75874	O75874	Isocitrate dehydrogenase [NADP] cytoplasmic	IDH1
21.2142162322998	20.8728256225586	21.260290145874	21.3350105285645	21.9695835113525	21.5489082336426	21.5096435546875	20.9669075012207	20.7018032073975	21.3736782073975	21.3054943084717	21.3346366882324	21.1436595916748	20.6144905090332	21.9965858459473	21.1945381164551	21.254524230957	21.1179275512695	21.0894737243652	20.0495300292969	21.2222213745117	21.6233215332031				2	2	2	4,9	4,9	4,9	55,278	0	46,459	175570000	93	O75907	O75907	Diacylglycerol O-acyltransferase 1	DGAT1
20.336145401001	22.1167697906494	21.3979091644287	21.275749206543	21.2274684906006	20.7589817047119	20.5131874084473	20.0383224487305	21.2537441253662	20.7953491210938	20.7484550476074	21.1036949157715	21.8405609130859	21.6588363647461	21.8813419342041	21.0562744140625	20.5446434020996	NaN	21.8742637634277	20.578929901123	21.3458003997803	20.6502704620361				2	2	2	10,6	10,6	10,6	33,548	0	4,3152	141960000	50	O75911	O75911	Short-chain dehydrogenase/reductase 3	DHRS3
24.1060562133789	24.3979873657227	24.3622207641602	24.6761856079102	24.1026420593262	24.0895175933838	24.171215057373	24.3307418823242	24.27707862854	24.6773643493652	24.0313358306885	24.7476806640625	23.9684143066406	24.0142059326172	24.3634510040283	24.3061943054199	24.5401878356934	24.0971832275391	24.1074180603027	24.2899894714355	24.1786670684814	24.2176265716553				9	9	5	30,1	30,1	19,7	60,692	0	241,9	2320800000	230	O75914-2;O75914;O75914-4;O75914-3	O75914-2;O75914;O75914-4;O75914-3	Serine/threonine-protein kinase PAK 3	PAK3
NaN	23.8621635437012	23.4900035858154	23.3558578491211	24.1233253479004	23.336597442627	23.8341255187988	23.2677516937256	23.9040775299072	23.5858688354492	24.4142227172852	24.3106842041016	22.891357421875	24.0096111297607	23.6653022766113	23.4961624145508	23.863245010376	23.581184387207	23.1239051818848	23.7400436401367	24.1378211975098	23.6576614379883				4	4	4	36,4	36,4	36,4	26,131	0	18,559	765850000	51	O75934	O75934	Pre-mRNA-splicing factor SPF27	BCAS2
23.8345470428467	23.3996391296387	23.8803901672363	23.8678340911865	23.4520206451416	23.3827495574951	24.1494483947754	23.174560546875	23.4598617553711	23.1568412780762	23.77321434021	23.6746368408203	23.8395729064941	23.9822654724121	23.6225662231445	23.7641525268555	24.2614459991455	23.6829013824463	23.7799091339111	23.6766986846924	23.9462890625	23.4068183898926				4	4	4	33,2	33,2	33,2	26,711	0	32,507	1424800000	202	O75940	O75940	Survival of motor neuron-related-splicing factor 30	SMNDC1
21.8378200531006	21.584789276123	21.3352947235107	21.5826091766357	21.974084854126	21.1236763000488	21.6690444946289	21.7404594421387	21.5053291320801	21.7558250427246	21.9236278533936	21.9989051818848	21.9936580657959	21.4641742706299	21.545539855957	21.4378337860107	21.758825302124	21.8169021606445	21.5924835205078	21.5957050323486	21.8531265258789	21.4773292541504				6	6	6	6,4	6,4	6,4	214,8	0	104,13	319540000	103	O75970-5;O75970-3;O75970-2;O75970	O75970-5;O75970-3;O75970-2;O75970	Multiple PDZ domain protein	MPDZ
23.3245811462402	23.0150909423828	23.4439964294434	23.5144805908203	23.4795150756836	23.1140613555908	23.4019775390625	23.3049907684326	23.3931636810303	23.1515865325928	23.5553798675537	23.1709022521973	23.3698024749756	22.9766082763672	23.4780960083008	23.1764450073242	23.4977970123291	23.9756717681885	23.2256546020508	23.0539588928223	23.6359691619873	23.398738861084				3	3	3	10	10	10	74,605	0	39,459	1202200000	226	O76094;O76094-2	O76094;O76094-2	Signal recognition particle subunit SRP72	SRP72
21.1086578369141	21.3096923828125	22.1946964263916	NaN	21.2184982299805	22.3828239440918	20.8518218994141	21.7821044921875	22.2567749023438	22.0613136291504	22.0232353210449	NaN	22.1642913818359	22.2854843139648	22.4337482452393	23.2170753479004	NaN	21.8990707397461	23.4986019134521	22.3638610839844	23.0998516082764	21.6160850524902				6	6	3	13,6	13,6	5,6	84,523	0	28,254	361750000	75	O77564	O77564
25.7271137237549	25.7531261444092	26.1182823181152	25.7345790863037	25.877986907959	26.0655040740967	25.7977600097656	26.1916027069092	25.9029350280762	25.8924732208252	26.1106147766113	25.7950553894043	25.8151016235352	26.2688236236572	25.8415603637695	25.9639453887939	26.0933628082275	26.2182884216309	26.2125339508057	26.1492919921875	25.9636650085449	25.9157943725586				7	7	7	28,5	28,5	28,5	30,132	0	287,07	7265200000	516	O77591;P29218-2;P29218;P29218-3	O77591
26.7261695861816	26.880672454834	25.9303131103516	26.3865261077881	26.7045059204102	26.7085208892822	26.6030979156494	26.6977787017822	26.6131534576416	26.7941741943359	26.4695949554443	26.834981918335	26.3853225708008	26.5061874389648	26.0842475891113	26.2768993377686	26.5447540283203	26.4787693023682	26.5278472900391	26.9386348724365	26.6510887145996	26.7197856903076				4	4	4	24,6	24,6	24,6	37,919	0	147,81	11340000000	360	O77735;O15126-2;O15126	O77735;O15126-2;O15126	Secretory carrier-associated membrane protein 1	SCAMP1
25.6465511322021	25.7323474884033	25.7346935272217	26.0653228759766	26.0030918121338	25.9079322814941	26.0312252044678	26.1892604827881	25.3356685638428	25.0704574584961	25.7049255371094	25.0852432250977	26.0494480133057	26.0377388000488	25.8625869750977	24.8840675354004	25.6742839813232	25.5969390869141	25.3508834838867	25.5836372375488	26.0459976196289	25.2870502471924				5	5	5	14,5	14,5	14,5	35,647	0	73,748	6426800000	183	O79874;P03886	O79874
23.2673187255859	23.2929801940918	23.555118560791	23.6009140014648	23.7670955657959	23.7313575744629	23.6083602905273	23.1510353088379	23.2330493927002	23.1042404174805	23.5237884521484	23.2359371185303	23.5233783721924	23.4789848327637	23.0618228912354	22.8112411499023	23.4578628540039	22.9766368865967	23.2045402526855	23.9479579925537	22.6033744812012	22.844087600708				4	4	4	19	19	19	39,055	0	116,57	1170400000	101	O79875	O79875
27.2664680480957	27.5609874725342	26.7035903930664	26.6593761444092	26.9363460540771	27.2980842590332	27.5816459655762	27.4953060150146	26.6365356445313	26.6485939025879	26.5655250549316	27.1572799682617	27.3611392974854	26.6964302062988	26.7911357879639	26.7451496124268	26.8339519500732	26.9159774780273	26.0589904785156	26.9952239990234	26.7071170806885	27.4207439422607				3	3	3	12,6	12,6	12,6	56,958	0	35,899	17949000000	390	O79876;P00395	O79876
21.5698184967041	20.9399719238281	21.8651142120361	22.4896125793457	21.4939842224121	21.7847537994385	22.1479072570801	23.0031890869141	22.0514221191406	21.5375652313232	21.9404010772705	22.0144519805908	22.1839847564697	NaN	22.3448677062988	22.334644317627	22.3909740447998	21.0133056640625	21.8974761962891	21.8476333618164	20.7592964172363	21.262716293335				3	3	3	10,2	10,2	10,2	51,824	0	9,0001	367810000	95	O79881;P03905	O79881;P03905	NADH-ubiquinone oxidoreductase chain 4	MT-ND4
22.5503711700439	21.4221801757813	NaN	21.566764831543	21.9657707214355	22.5323753356934	21.5077438354492	20.7271690368652	21.4382209777832	21.4355278015137	21.4912071228027	NaN	22.8360137939453	21.5714569091797	NaN	22.2718753814697	21.6641044616699	22.8813400268555	22.9239654541016	23.0461349487305	21.7785224914551	NaN				2	2	2	0,9	0,9	0,9	280,05	0,0038491	2,0919	164510000	26	O90370;O90368;P13886;Q8JUX6;Q5XXP4	O90370;O90368;P13886;Q8JUX6;Q5XXP4
22.8653621673584	22.5542659759521	22.832145690918	22.5175170898438	22.7946243286133	23.091724395752	23.0017585754395	23.1056785583496	22.8101406097412	23.1180534362793	23.4700222015381	23.1877288818359	23.0902519226074	22.36376953125	23.1953926086426	23.097412109375	23.217378616333	22.7164173126221	23.0366191864014	22.6854000091553	23.2284374237061	22.4726219177246				3	3	3	17,8	17,8	17,8	34,624	0	11,328	826750000	139	O94766-2;O94766	O94766-2;O94766	Galactosylgalactosylxylosylprotein 3-beta-glucuronosyltransferase 3	B3GAT3
24.2909355163574	24.2321529388428	23.8005485534668	24.2996425628662	24.3984966278076	24.2485675811768	24.42942237854	24.3675079345703	24.2894115447998	24.3270359039307	24.104793548584	23.8568935394287	24.1351642608643	23.9510116577148	24.3658046722412	24.3208999633789	24.26611328125	23.9783325195313	24.2628345489502	24.1607646942139	24.2681217193604	24.3579025268555				6	6	5	14,7	14,7	13,2	75,022	0	155,5	2206200000	271	O94776;O94776-2	O94776;O94776-2	Metastasis-associated protein MTA2	MTA2
23.4904174804688	23.5547866821289	23.807300567627	23.86696434021	24.0044593811035	23.8034439086914	23.1610794067383	23.1800327301025	24.0555953979492	23.3886375427246	23.6005191802979	24.6300086975098	23.5730972290039	23.7472076416016	23.3222408294678	22.7192573547363	23.074089050293	24.1571521759033	23.6114025115967	24.0317096710205	23.4737739562988	23.6905117034912				2	2	2	6,3	6,3	6,3	65,719	0	4,2891	1043000000	57	O94819	O94819	Kelch repeat and BTB domain-containing protein 11	KBTBD11
27.4124507904053	27.3537635803223	27.2880935668945	27.5754814147949	27.4498310089111	27.4863986968994	27.4278469085693	27.5553150177002	27.41064453125	27.233081817627	27.1893348693848	27.2442302703857	26.6965465545654	27.5344772338867	26.8855323791504	27.1278381347656	27.4771270751953	27.578182220459	27.0767688751221	27.5174961090088	26.9427261352539	27.2691326141357				15	15	15	40	40	40	67,454	0	323,31	18680000000	1035	O94826	O94826	Mitochondrial import receptor subunit TOM70	TOMM70A
21.0499515533447	21.6310749053955	20.3253135681152	20.718713760376	18.9602222442627	20.5055885314941	19.7916927337646	21.0006256103516	20.7956657409668	20.6001415252686	21.3781967163086	21.0171508789063	21.7222003936768	20.4513111114502	21.3331108093262	20.8358402252197	20.6697807312012	22.1644744873047	20.9475727081299	20.6615352630615	21.6761894226074	21.0567092895508				3	3	2	7,9	7,9	5,5	63,594	0	47,154	123930000	51	O94842-3;O94842-2;O94842;Q96NM4-3;Q96NM4-4;O15405-2;O15405	O94842-3;O94842-2;O94842	TOX high mobility group box family member 4	TOX4
26.1118469238281	26.3987293243408	26.230339050293	26.3710021972656	26.2424125671387	26.4663200378418	26.2687664031982	26.3120956420898	26.1267833709717	26.1930522918701	26.0666580200195	26.1319923400879	25.8070793151855	26.3331203460693	25.7088623046875	25.9138450622559	26.2872276306152	26.2927684783936	26.0518569946289	26.3175354003906	26.0328903198242	26.1325531005859				16	16	16	20,5	20,5	20,5	137,61	0	323,31	8519400000	934	O94856-9;O94856-4;O94856-12;O94856-6;O94856-13;O94856;O94856-11;O94856-7;O94856-5;O94856-10;O94856-3;O94856-8;O94856-2	O94856-9;O94856-4;O94856-12;O94856-6;O94856-13;O94856;O94856-11;O94856-7;O94856-5;O94856-10;O94856-3;O94856-8;O94856-2	Neurofascin	NFASC
21.8449268341064	22.084436416626	21.6388721466064	22.6638412475586	22.3352241516113	22.7949314117432	22.0623817443848	22.2181854248047	21.8936882019043	22.1412048339844	22.7033271789551	22.553258895874	22.6622638702393	22.6550846099854	22.5064239501953	22.0438423156738	22.7833480834961	22.3654766082764	22.8005619049072	21.9795722961426	22.1309375762939	21.9960117340088				5	5	5	8,6	8,6	8,6	89,594	0	22,781	546720000	100	O94874;O94874-2;O94874-3	O94874;O94874-2;O94874-3	E3 UFM1-protein ligase 1	UFL1
23.8656730651855	23.8404064178467	23.9737854003906	23.8485908508301	23.6548595428467	23.6684036254883	23.8242492675781	23.9252319335938	23.8264446258545	23.7122440338135	23.0745677947998	23.8357315063477	23.7270030975342	23.7056465148926	23.8990707397461	23.8179149627686	24.1163635253906	24.159818649292	23.9211845397949	24.1284561157227	23.9810028076172	23.8947257995605				4	4	4	11	11	11	54,862	0	20,479	1750800000	211	O94888	O94888	UBX domain-containing protein 7	UBXN7
25.4539527893066	25.4282760620117	25.7535743713379	25.9048957824707	25.6919841766357	25.6837310791016	25.6006164550781	25.2573299407959	25.4302635192871	25.1885662078857	25.7308540344238	25.6697578430176	25.9505195617676	25.5084934234619	25.5931529998779	25.618522644043	25.487232208252	25.5404148101807	25.7002429962158	25.5488243103027	25.9679832458496	25.7014198303223				7	7	7	24,2	24,2	24,2	37,839	0	154,27	5719500000	221	O94905;O94905-2;O94905-3;O75477	O94905	Erlin-2	ERLIN2
21.0860157012939	21.5250358581543	NaN	20.7265872955322	21.9030838012695	20.7556686401367	21.0687446594238	NaN	21.5765552520752	21.4508590698242	21.4509906768799	21.4434928894043	22.2333316802979	21.817699432373	21.6424102783203	21.479154586792	21.8700637817383	21.7773380279541	22.0466747283936	21.7231407165527	21.2325325012207	21.1061058044434				5	5	5	9,1	9,1	9,1	102,43	0	12,382	196390000	61	O94906-2;O94906	O94906-2;O94906	Pre-mRNA-processing factor 6	PRPF6
28.0097770690918	28.0198059082031	28.0280323028564	27.9083595275879	27.9596481323242	27.9748935699463	28.1613655090332	28.1012210845947	27.9916915893555	27.9507961273193	27.855037689209	28.2123928070068	27.5580501556396	28.2652740478516	27.1075344085693	27.8338317871094	28.2023391723633	27.9648838043213	27.5585517883301	27.904411315918	27.6483707427979	28.0066432952881				17	17	5	35,3	35,3	13,5	73,46	0	323,31	28374000000	1096	O94925	O94925	Glutaminase kidney isoform, mitochondrial	GLS
22.1429309844971	21.9224720001221	22.2390270233154	21.3698062896729	22.2132129669189	21.5953407287598	20.9979095458984	21.8845596313477	21.720645904541	21.9767913818359	21.1455345153809	21.7549819946289	21.1287422180176	21.1725425720215	22.0516548156738	21.8705310821533	21.8765964508057	21.8564205169678	20.6334285736084	21.9235038757324	20.6296977996826	21.8519458770752				14	2	2	30,1	5,7	5,7	65,459	0	4,4595	216020000	46	O94925-3	O94925-3	Glutaminase kidney isoform, mitochondrial	GLS
22.0142593383789	23.4532737731934	21.9307479858398	22.5432643890381	22.0788650512695	23.2955799102783	20.9101676940918	NaN	22.7188129425049	22.3269920349121	21.6846923828125	21.7111225128174	23.0169448852539	22.1461906433105	22.0087089538574	22.4797344207764	21.8694019317627	NaN	22.581184387207	22.3318881988525	22.3522930145264	22.6107444763184				2	2	2	6,6	6,6	6,6	71,478	0	18,532	214380000	37	O94952-1;O94952	O94952-1;O94952	F-box only protein 21	FBXO21
22.2275447845459	22.5701370239258	22.9238967895508	22.8001670837402	22.3272933959961	22.890453338623	22.6371154785156	22.7742958068848	22.5906295776367	22.5334663391113	22.6326370239258	22.0944881439209	21.9858112335205	22.4484558105469	22.2369441986084	22.4032039642334	22.658863067627	22.6774940490723	22.3300380706787	22.7349472045898	22.225830078125	22.1976432800293				9	9	9	16,8	16,8	16,8	98,515	0	34,581	688360000	208	O94967-2;O94967;O94967-3;O94967-4	O94967-2;O94967;O94967-3;O94967-4	WD repeat-containing protein 47	WDR47
26.1465396881104	26.3321495056152	26.2203979492188	26.3917217254639	26.2788505554199	26.5493068695068	26.3870964050293	26.1330184936523	26.345027923584	26.3048820495605	26.2726593017578	26.2895011901855	26.4918689727783	26.6826782226563	26.4308586120605	26.6310234069824	26.6714515686035	26.6803894042969	26.6913738250732	26.6981735229492	26.652551651001	26.6772766113281				14	8	8	22,6	13,7	13,7	104,09	0	184,12	10366000000	528	O94973-2;O94973-3;O94973	O94973-2;O94973-3;O94973	AP-2 complex subunit alpha-2	AP2A2
24.1625156402588	24.2389221191406	24.0286426544189	24.4554843902588	24.7010154724121	24.5178604125977	24.4948635101318	23.9570693969727	24.0081443786621	24.1508445739746	24.3675746917725	24.3178291320801	23.3258972167969	24.7360401153564	23.4823722839355	24.5513973236084	24.3184566497803	24.280403137207	23.8958549499512	24.2058029174805	23.7498035430908	24.1283912658691				3	3	3	23,7	23,7	23,7	22,329	0	89,53	2028700000	152	O95057	O95057	GTP-binding protein Di-Ras1	DIRAS1
23.1809787750244	22.7889575958252	23.0013732910156	22.7782459259033	22.7484855651855	22.905517578125	22.9893608093262	23.0654716491699	22.7573089599609	22.6454582214355	22.8990440368652	23.1983127593994	23.3962707519531	23.0511817932129	23.0867538452148	23.0626544952393	23.1763019561768	22.8002243041992	23.0153656005859	22.8617210388184	22.9039573669434	23.0279350280762				4	4	3	6,2	6,2	5,1	125,87	0	10,17	926220000	141	O95104;O95104-3;O95104-2	O95104;O95104-3;O95104-2	Splicing factor, arginine/serine-rich 15	SCAF4
24.1978340148926	24.1183567047119	24.3367118835449	24.4139366149902	24.3043155670166	24.4894886016846	24.2442111968994	24.1597862243652	24.0110759735107	24.0738677978516	24.0874137878418	24.1047878265381	23.9827785491943	24.2610015869141	23.5192108154297	24.1356887817383	24.330509185791	24.2162322998047	24.060510635376	24.1466217041016	24.0363311767578	24.4689884185791				6	6	6	11,4	11,4	11,4	86,401	0	43,309	2115000000	231	O95140;O95140-2	O95140	Mitofusin-2	MFN2
21.8457927703857	22.4008865356445	22.1970634460449	22.5636348724365	22.2930469512939	21.8763008117676	22.3134460449219	22.2586841583252	21.5810146331787	21.7548522949219	21.9538421630859	21.6727294921875	21.3610496520996	22.1491603851318	22.2193870544434	21.9971408843994	22.2084197998047	22.6227378845215	22.1514625549316	22.0253219604492	22.6244773864746	22.4995212554932				12	12	12	17,6	17,6	17,6	133,27	0	72,326	449110000	157	O95155-2;O95155;O95155-4;O95155-3	O95155-2;O95155;O95155-4;O95155-3	Ubiquitin conjugation factor E4 B	UBE4B
25.8056583404541	25.2269897460938	25.3386611938477	25.5500259399414	24.6090888977051	25.7070922851563	25.8319282531738	26.1111431121826	25.6648406982422	25.6188201904297	25.5809631347656	25.6008529663086	25.4582595825195	25.4021816253662	25.1741561889648	25.5028800964355	24.2891731262207	24.676212310791	25.5656242370605	25.5814876556396	25.4192237854004	25.5778961181641				2	2	2	14,8	14,8	14,8	18,479	0	67,455	5658700000	214	O95169-3;O95169-2;O95169	O95169-3;O95169-2;O95169	NADH dehydrogenase [ubiquinone] 1 beta subcomplex subunit 8, mitochondrial	NDUFB8
22.0289268493652	22.3188133239746	22.2390632629395	22.5326595306396	21.961612701416	22.0483131408691	22.3844127655029	22.0509395599365	22.0060653686523	22.3622226715088	22.5506439208984	22.4525337219238	21.9313068389893	22.4114036560059	21.6765174865723	21.9705371856689	21.7600116729736	22.2229290008545	21.5346946716309	22.232421875	22.109769821167	22.0613746643066				3	3	3	3,9	3,9	3,9	100,82	0	11,857	543770000	181	O95197-7;O95197-2;O95197;O95197-3;O95197-4;O95197-5	O95197-7;O95197-2;O95197;O95197-3;O95197-4	Reticulon-3	RTN3
23.3705444335938	23.4233646392822	23.2584648132324	23.4581394195557	23.6008567810059	23.58154296875	23.9873085021973	23.6612739562988	23.4007625579834	23.7050285339355	23.7290306091309	23.6357498168945	23.4829292297363	23.3389930725098	23.6200160980225	23.9081192016602	23.5955257415771	22.8310432434082	23.6759567260742	23.8406982421875	23.3965816497803	23.4670963287354				5	5	5	10	10	10	83,353	0	43,037	1368900000	146	O95202;O95202-2;O95202-3	O95202	LETM1 and EF-hand domain-containing protein 1, mitochondrial	LETM1
23.492374420166	23.6631240844727	24.0792121887207	23.8248996734619	23.7300262451172	24.1787700653076	24.5112571716309	24.4682521820068	24.0730018615723	23.4353733062744	24.2388763427734	23.5733413696289	24.153938293457	22.9512519836426	24.275598526001	24.3998947143555	24.0762481689453	24.2094345092773	24.2886657714844	23.798807144165	24.641487121582	24.4281997680664				5	5	5	15,3	15,3	15,3	51,466	0	71,447	1983300000	179	O95232;O95232-2	O95232	Luc7-like protein 3	LUC7L3
23.7247924804688	23.6592350006104	23.9799613952637	23.7891273498535	24.3161125183105	24.0475559234619	23.6776313781738	23.9231395721436	23.796745300293	23.5104503631592	23.6300659179688	23.5815143585205	23.7507152557373	24.18284034729	23.9436531066895	23.9268379211426	23.8708553314209	23.7675857543945	23.9228496551514	23.9057350158691	23.9679107666016	23.6994876861572				2	2	2	5,9	5,9	5,9	52,054	0	61,457	1717800000	142	O95319-5;O95319-2;O95319;O95319-4;O95319-3	O95319-5;O95319-2;O95319;O95319-4;O95319-3	CUGBP Elav-like family member 2	CELF2
25.3277244567871	25.4157695770264	25.552001953125	25.0375099182129	25.0808486938477	25.2056484222412	25.1944789886475	25.3833770751953	24.9216804504395	25.1127643585205	24.9282341003418	24.977367401123	24.4863624572754	25.0623474121094	25.2372932434082	25.0219955444336	25.1445274353027	25.2627258300781	25.1337451934814	25.0709228515625	24.6114959716797	24.7363719940186				2	2	2	8,9	8,9	8,9	27,547	0	17,015	4156900000	190	O95336	O95336	6-phosphogluconolactonase	PGLS
24.963773727417	25.4377212524414	25.4684238433838	23.5409507751465	25.9206790924072	25.3344268798828	25.4858436584473	25.2954750061035	25.3218479156494	24.3593997955322	24.9155387878418	24.885124206543	24.4741115570068	25.553352355957	24.6023101806641	25.0721740722656	23.4939804077148	24.7055702209473	25.23801612854	25.1321811676025	24.5289649963379	24.4718437194824				3	3	3	4,1	4,1	4,1	146,41	0,00030193	3,6905	3481800000	76	O95342	O95342	Bile salt export pump	ABCB11
22.8076305389404	22.7308692932129	22.3107738494873	22.8094367980957	22.5280418395996	22.2876815795898	22.4227409362793	22.9883251190186	22.3905391693115	23.20556640625	22.6496391296387	22.3271255493164	22.3654518127441	22.6485290527344	22.3289413452148	22.7936553955078	22.5405578613281	23.286153793335	22.3681011199951	22.8015155792236	22.8403663635254	22.4278354644775				5	5	5	12,5	12,5	12,5	68,617	0	29,378	700190000	123	O95352-3;O95352;O95352-2	O95352-3;O95352;O95352-2	Ubiquitin-like modifier-activating enzyme ATG7	ATG7
24.0863647460938	24.3101978302002	24.495532989502	24.2658996582031	23.8146533966064	24.7039985656738	24.3211975097656	24.4295959472656	24.1236839294434	24.3257369995117	23.7625198364258	24.6504325866699	23.612606048584	24.4160060882568	24.4467945098877	24.6161193847656	24.4928855895996	24.8906764984131	24.5150775909424	24.2951202392578	23.7822074890137	23.5659599304199				4	4	4	37,2	37,2	37,2	24,737	0	30,081	2388800000	143	O95372	O95372	Acyl-protein thioesterase 2	LYPLA2
25.8291893005371	25.6213512420654	25.6260414123535	25.7903327941895	25.6883316040039	25.6641712188721	25.8434829711914	25.6981506347656	25.7234897613525	25.6743698120117	25.6985473632813	25.6300983428955	25.8139190673828	25.9206199645996	25.7620487213135	25.6462745666504	25.8134441375732	25.8679523468018	25.9741668701172	25.8613719940186	25.8119716644287	25.7379112243652				16	16	15	21,7	21,7	20,7	119,52	0	278,49	6386000000	690	O95373	O95373	Importin-7	IPO7
22.7316265106201	23.2511405944824	22.8551940917969	22.2384147644043	22.7291297912598	22.91188621521	23.094425201416	22.7731666564941	22.5709991455078	22.6244792938232	23.2431716918945	23.0622634887695	NaN	22.9849605560303	22.8887004852295	23.0706100463867	22.6114883422852	22.9262466430664	23.1632270812988	23.0298042297363	22.8239002227783	22.9733409881592				3	3	3	12,2	12,2	12,2	32,339	0	6,4716	556860000	60	O95433-2;O95433	O95433-2;O95433	Activator of 90 kDa heat shock protein ATPase homolog 1	AHSA1
21.9365234375	21.5515518188477	21.9905261993408	21.9763450622559	21.9840278625488	22.1280097961426	22.0659217834473	21.7605667114258	21.956916809082	21.5169773101807	22.272102355957	22.407829284668	21.8953628540039	22.2094135284424	22.5565338134766	21.8151016235352	21.779483795166	21.6474380493164	22.4857139587402	22.0809478759766	22.0147018432617	22.0396003723145				4	4	4	5,3	5,3	5,3	119,75	0	12,783	387210000	144	O95486;O95486-2	O95486;O95486-2	Protein transport protein Sec24A	SEC24A
22.5276298522949	22.246955871582	22.1905422210693	22.3963031768799	23.0235691070557	22.4908142089844	22.058349609375	22.253231048584	22.3259887695313	22.5043144226074	22.6363201141357	22.6861915588379	22.5684471130371	22.5606441497803	23.1172943115234	22.5485916137695	22.9348602294922	22.5772972106934	22.8845386505127	22.5542678833008	22.5948066711426	22.7395820617676				7	7	7	8,3	8,3	8,3	133,63	0	14,202	707120000	182	O95487-2;O95487;O95487-3	O95487-2;O95487;O95487-3	Protein transport protein Sec24B	SEC24B
22.0613441467285	20.8771858215332	21.4624881744385	22.2792644500732	21.1621551513672	22.3473339080811	21.3009510040283	NaN	22.7467441558838	22.4328384399414	21.5812873840332	21.7669677734375	21.9139366149902	21.2333698272705	21.0124626159668	NaN	21.8558082580566	21.8965034484863	21.7306423187256	21.2422714233398	21.9414558410645	21.634521484375				5	5	5	8,5	8,5	8,5	126,16	0	6,769	246050000	65	O95490-3;O95490-4;O95490-2;O95490-5;O95490;O95490-7;O95490-6	O95490-3;O95490-4;O95490-2;O95490-5;O95490;O95490-7;O95490-6	Latrophilin-2	LPHN2
23.6470527648926	23.0472106933594	23.5001411437988	23.0946197509766	23.3778114318848	23.293851852417	23.5385227203369	23.1446914672852	22.8425807952881	23.4536228179932	22.9454021453857	22.8219718933105	22.2939605712891	22.9419631958008	22.4503440856934	22.72731590271	23.1259460449219	23.3192234039307	22.6708354949951	23.4644088745117	22.7149868011475	23.217414855957				2	2	2	14,2	14,2	14,2	14,279	0	7,5868	1017900000	156	O95563	O95563	Mitochondrial pyruvate carrier 2	MPC2
23.0111312866211	22.4351272583008	22.6935939788818	22.2408561706543	22.6129531860352	22.2024917602539	22.4969158172607	22.9571762084961	23.4272594451904	22.9908351898193	22.8074798583984	22.3993797302246	21.7495212554932	22.6762886047363	22.6340179443359	22.7801055908203	22.6073017120361	22.6298713684082	22.813648223877	22.7688636779785	22.9271202087402	22.7186317443848				3	3	3	18,9	18,9	18,9	27,873	0	8,0389	790190000	181	O95571	O95571	Persulfide dioxygenase ETHE1, mitochondrial	ETHE1
23.4811878204346	23.6768569946289	23.0326671600342	23.8264713287354	23.3804359436035	23.7620086669922	24.1173133850098	23.7909698486328	23.5421562194824	23.7827835083008	23.563419342041	23.4753684997559	23.5219421386719	23.5075130462646	23.5781173706055	23.3339653015137	23.8209915161133	23.203052520752	23.6004009246826	23.7870178222656	23.6613311767578	23.354923248291				3	3	2	8,1	8,1	5,6	80,419	0	14,299	1462600000	141	O95573	O95573	Long-chain-fatty-acid--CoA ligase 3	ACSL3
26.6296920776367	26.8086204528809	26.707447052002	26.6006050109863	26.650634765625	26.7026348114014	26.4763965606689	26.5363063812256	26.3964767456055	26.8832206726074	26.443395614624	26.7400970458984	25.6655731201172	25.9750747680664	25.975679397583	26.3310604095459	26.3069553375244	26.4439868927002	26.3741779327393	26.2669067382813	26.1449890136719	26.3999328613281				4	4	2	48,3	48,3	34,7	13,579	0	194,69	10248000000	161	Q9TSV6;O95670;O95670-2;O95670-3	Q9TSV6;O95670;O95670-2;O95670-3	V-type proton ATPase subunit G 2	ATP6V1G2
21.6245708465576	22.2289886474609	22.2591285705566	22.0032577514648	21.870304107666	22.0013866424561	22.1260299682617	21.983304977417	21.2159633636475	21.6796875	21.6104297637939	21.8885936737061	21.6371612548828	22.1579399108887	21.286678314209	21.5446014404297	22.5331192016602	21.9641246795654	21.1481533050537	21.7812671661377	21.5151329040527	22.2039337158203				7	7	4	24,7	24,7	12,7	48,053	0	85,606	433970000	207	O95718;O95718-2;O95718-1;P11474-2;P11474	O95718;O95718-2;O95718-1	Steroid hormone receptor ERR2	ESRRB
24.2869033813477	24.4988574981689	24.95383644104	24.7485542297363	24.7110557556152	24.7707958221436	24.4928646087646	24.398473739624	24.7716636657715	24.9175109863281	24.2461433410645	24.0023231506348	24.3020057678223	24.532751083374	24.273193359375	24.4853973388672	24.2072353363037	24.610164642334	24.2872161865234	24.3765449523926	24.3005180358887	24.1279716491699				5	5	4	13,8	13,8	12,2	61,99	0	65,342	2683700000	228	O95741;O95741-2	O95741;O95741-2	Copine-6	CPNE6
27.9051246643066	27.8872241973877	27.9053611755371	27.8093643188477	27.8995170593262	27.9513645172119	27.9108428955078	27.8253688812256	28.0038623809814	27.9179744720459	27.7951431274414	27.7236366271973	27.7642993927002	28.0753192901611	27.6275539398193	27.8310356140137	27.9369220733643	27.9832305908203	27.6851024627686	27.999153137207	27.7790622711182	27.9131813049316				19	17	16	32,5	30,9	29,2	94,511	0	323,31	27382000000	847	O95757	O95757	Heat shock 70 kDa protein 4L	HSPA4L
22.5273628234863	22.8116664886475	22.7233581542969	22.7847290039063	22.9215221405029	22.5516719818115	22.915901184082	23.0366096496582	22.376350402832	22.326244354248	22.9951076507568	22.7118072509766	23.3175678253174	23.1799049377441	23.6712665557861	23.0695018768311	22.791711807251	23.2566070556641	23.098783493042	22.5367584228516	23.4515933990479	22.6226978302002				4	3	3	14,4	12,9	12,9	56,501	0	72,432	854860000	155	O95758-1;O95758-6;O95758-2;O95758;O95758-5;O95758-4;O95758-7	O95758-1;O95758-6;O95758-2;O95758;O95758-5;O95758-4;O95758-7	Polypyrimidine tract-binding protein 3	PTBP3
24.4844036102295	23.9677925109863	23.6179904937744	23.7008590698242	23.5635681152344	23.8199825286865	23.7013416290283	23.5356941223145	23.3091068267822	23.5816307067871	23.6824188232422	23.6791648864746	23.3503799438477	23.4705619812012	23.4107570648193	23.3441429138184	23.5559177398682	22.1294326782227	23.4075050354004	23.6043605804443	23.71337890625	23.0875778198242				3	3	3	52,1	52,1	52,1	10,403	0	13,628	1358700000	127	O95777	O95777	U6 snRNA-associated Sm-like protein LSm8	LSM8
28.2762069702148	28.2802124023438	28.3727207183838	28.422679901123	28.3862457275391	28.4918098449707	28.3297653198242	28.4407958984375	28.1791858673096	28.2537803649902	28.3109550476074	28.2920341491699	28.2160968780518	28.3405876159668	28.2279586791992	28.1408023834229	28.4279670715332	28.3153343200684	28.3199195861816	28.4265975952148	28.2370281219482	28.2732200622559				25	25	19	36,8	36,8	28,1	105,36	0	201,15	37115000000	1513	O95782-2;O95782	O95782-2;O95782	AP-2 complex subunit alpha-1	AP2A1
22.3781871795654	22.4291591644287	22.2498798370361	23.1428356170654	22.1078205108643	22.6703872680664	22.4939670562744	22.4001350402832	22.9071350097656	22.5004024505615	22.8143501281738	22.7371864318848	23.2969627380371	22.1040725708008	22.9389057159424	22.5694847106934	22.3346710205078	22.825532913208	22.6970844268799	22.6890735626221	23.1771621704102	23.0026569366455				8	8	8	29,2	29,2	29,2	54,933	0	68,694	657400000	104	O95793-2;O95793-3;O95793	O95793-2;O95793-3;O95793	Double-stranded RNA-binding protein Staufen homolog 1	STAU1
28.30149269104	28.1589603424072	28.2440185546875	28.3629283905029	28.3257904052734	28.4075012207031	28.4253387451172	28.4346084594727	28.3612861633301	28.3389110565186	28.2963066101074	28.4502468109131	28.339916229248	28.4717445373535	28.1222629547119	28.4173316955566	28.5840282440186	28.5697059631348	28.1839485168457	28.4334754943848	28.3365669250488	28.304557800293				11	11	11	27,8	27,8	27,8	66,294	0	251,16	38595000000	936	O95831-3;O95831;O95831-2;O95831-6;O95831-4;O95831-5	O95831-3;O95831;O95831-2	Apoptosis-inducing factor 1, mitochondrial	AIFM1
25.4320068359375	25.3803615570068	25.3687191009521	25.6464538574219	25.3497867584229	25.3410339355469	25.4610080718994	25.4388961791992	25.3132305145264	25.0454273223877	25.5349769592285	25.5282115936279	24.6837291717529	25.6255302429199	25.2960510253906	25.8680381774902	25.4885559082031	25.5505599975586	25.5552310943604	25.05810546875	25.0121593475342	24.8760948181152				3	3	3	7,1	7,1	7,1	70,678	0	20,876	4719800000	193	O95834;O95834-2;O95834-3	O95834;O95834-2;O95834-3	Echinoderm microtubule-associated protein-like 2	EML2
22.9782695770264	23.1542282104492	22.8907279968262	20.6202011108398	23.7110404968262	22.6328239440918	23.1668453216553	23.3579807281494	22.7764053344727	22.886173248291	22.8800086975098	22.9048023223877	23.9329738616943	23.2591743469238	23.3267860412598	23.6289653778076	23.47336769104	23.4820899963379	23.3043880462646	23.2192211151123	22.7246971130371	23.1869583129883				5	5	5	27,9	27,9	27,9	33,392	0	9,9339	898610000	106	O95861;O95861-2;O95861-3;O95861-4	O95861;O95861-2;O95861-3;O95861-4	3(2),5-bisphosphate nucleotidase 1	BPNT1
27.6351222991943	27.5267219543457	27.7482089996338	27.6898956298828	27.8584327697754	27.700963973999	27.9481353759766	27.8387870788574	27.9466972351074	27.446720123291	27.9466323852539	27.7402400970459	28.0240135192871	27.7503528594971	27.5665378570557	27.9461212158203	27.7624473571777	27.8134651184082	27.8341903686523	27.5523300170898	27.9100494384766	27.662036895752				7	7	6	38,2	38,2	35,4	29,644	0	30,367	25375000000	393	O95865	O95865	N(G),N(G)-dimethylarginine dimethylaminohydrolase 2	DDAH2
23.4779968261719	23.6168823242188	23.7792205810547	23.6340160369873	23.852424621582	23.753381729126	23.6128826141357	23.7560386657715	23.8784141540527	23.3630676269531	23.4456882476807	23.5844039916992	23.4568576812744	23.8231754302979	23.6497421264648	24.1087131500244	23.6909027099609	23.8098773956299	23.463529586792	23.9827461242676	23.4687767028809	23.447868347168				6	6	6	15,6	15,6	15,6	59,382	0	11,43	1545300000	180	O95870-2;O95870	O95870-2;O95870	Abhydrolase domain-containing protein 16A	ABHD16A
23.4522304534912	23.1076927185059	23.2383499145508	23.5847434997559	23.1860656738281	23.272029876709	23.1312446594238	23.6738739013672	23.3218765258789	22.9975109100342	23.3630352020264	23.427375793457	23.0762977600098	23.3945083618164	23.1904678344727	22.9920349121094	23.5540924072266	23.4138965606689	23.4228820800781	23.0128326416016	23.388858795166	23.2449951171875				4	4	4	8,5	8,5	8,5	65,596	0	135,4	1211300000	190	O96005-3;O96005-4;O96005	O96005-3;O96005-4;O96005	Cleft lip and palate transmembrane protein 1	CLPTM1
25.4335842132568	25.1152076721191	25.3262939453125	25.3727931976318	25.5019683837891	25.433801651001	25.4129333496094	25.0321559906006	25.275260925293	24.9429988861084	25.6044769287109	25.5916404724121	24.889102935791	25.3490085601807	25.1535911560059	25.3978080749512	25.5151634216309	25.4747734069824	25.3954238891602	25.358865737915	25.0191020965576	25.0181789398193				7	7	7	31,6	31,6	31,6	37,893	0	223,54	4428100000	210	O96008;O96008-2	O96008;O96008-2	Mitochondrial import receptor subunit TOM40 homolog	TOMM40
25.3085880279541	25.2912311553955	25.0206928253174	25.4520568847656	25.2419853210449	25.1232261657715	25.1427841186523	25.231575012207	25.0774230957031	25.1434593200684	25.3952407836914	24.5636520385742	25.5513191223145	25.4550285339355	25.59228515625	25.3496780395508	25.1224937438965	25.1896305084229	25.3684597015381	25.2194900512695	25.3893280029297	25.1735496520996				7	7	6	28,7	28,7	25,9	47,46	0	75,435	4533700000	433	O96019;O96019-2	O96019;O96019-2	Actin-like protein 6A	ACTL6A
27.8948917388916	27.8403816223145	28.1198387145996	28.0592384338379	28.0965385437012	28.0093803405762	27.9775409698486	27.9751987457275	27.9535980224609	27.9106998443604	27.9493160247803	28.0689563751221	27.5361080169678	28.1144466400146	27.3512878417969	27.9659233093262	27.9779891967773	28.0749053955078	27.7637615203857	27.9481887817383	27.6942939758301	27.7903156280518				14	14	6	42,1	42,1	22,4	46,258	0	300,92	28461000000	1180	O97580	O97580
20.1647472381592	20.479850769043	20.81201171875	20.2637386322021	20.0916957855225	20.4298896789551	20.6400260925293	20.8690853118896	20.5726089477539	20.738245010376	20.4151077270508	20.0597667694092	20.4782524108887	20.1165103912354	20.2058544158936	20.536808013916	20.127290725708	20.6469593048096	20.3199825286865	20.2618503570557	20.7580833435059	20.6812744140625				5	5	5	53,1	53,1	53,1	11,153	0	5,5173	153150000	113	P00172-2;P00172;P00167-2;P00167-3;P00167	P00172-2;P00172;P00167-2;P00167-3;P00167	Cytochrome b5	CYB5A
31.7798538208008	31.8620185852051	31.9343719482422	31.804012298584	31.8599948883057	31.8120880126953	31.7985401153564	31.8094844818115	31.6979751586914	31.7245540618896	31.8821468353271	31.8507061004639	31.8002281188965	31.948938369751	31.5350170135498	31.7766857147217	31.888370513916	32.003963470459	31.685396194458	31.8979949951172	31.6361446380615	31.8064308166504				17	16	16	62,3	58,7	58,7	36,612	0	323,31	423520000000	4666	P00336;P07195	P00336;P07195	L-lactate dehydrogenase B chain	LDHB
29.7300872802734	29.7541675567627	29.7789115905762	29.6845397949219	29.7504386901855	29.7807273864746	29.891716003418	29.7752952575684	30.1999778747559	30.0409717559814	30.03737449646	30.007495880127	30.0131988525391	29.8731307983398	29.6849975585938	29.8613662719727	29.6121559143066	29.8413906097412	29.75608253479	29.7594451904297	29.9069175720215	29.9886112213135				21	21	20	76,2	76,2	72,6	36,618	0	323,31	109840000000	3142	P00339;P00338-4;P00338;P00338-3;P00338-5;P00338-2;Q9TSX5;Q6ZMR3;P07864	P00339
32.1135330200195	32.1327362060547	32.3677444458008	32.2157897949219	32.2237434387207	32.2697334289551	32.2915992736816	32.3999938964844	32.2262573242188	32.270320892334	31.9450836181641	32.2711753845215	31.7649612426758	32.2453422546387	31.7123947143555	32.0583038330078	32.2761459350586	32.2873306274414	32.0045433044434	32.3043746948242	31.8365917205811	31.8875198364258				19	19	19	63,9	63,9	63,9	35,484	0	323,31	530200000000	2191	P00346;P40926;P40926-2	P00346;P40926	Malate dehydrogenase, mitochondrial	MDH2
23.4819717407227	23.2548580169678	24.3602027893066	23.8999271392822	23.5829982757568	23.4392700195313	24.685173034668	24.2177982330322	23.7381763458252	23.3946723937988	24.5836009979248	23.6482105255127	24.0386295318604	23.9572048187256	23.538782119751	24.4466075897217	23.8208522796631	23.9281005859375	23.9164600372314	23.9681510925293	24.2337493896484	24.2111034393311				5	5	5	33,1	33,1	33,1	34,161	0	24,72	1470800000	101	P00348	P00348
25.0149326324463	24.9904174804688	24.8060264587402	25.1007270812988	24.7714958190918	25.4401836395264	25.3016471862793	24.9828662872314	24.9101371765137	25.1788749694824	24.7625904083252	25.3928031921387	25.2185211181641	24.8676509857178	24.4654693603516	24.789213180542	25.4996204376221	24.9390468597412	25.0793628692627	25.2220916748047	24.5773239135742	25.6123657226563				6	6	6	15,6	15,6	15,6	54,861	0	59,383	4335300000	159	P00352	P00352	Retinal dehydrogenase 1	ALDH1A1
33.2218742370605	33.2771987915039	33.3098831176758	33.2828750610352	33.2823104858398	33.1650199890137	33.3479919433594	33.4436912536621	33.4721717834473	33.4626960754395	33.3685150146484	33.5292816162109	33.3293304443359	33.2747611999512	33.1242752075195	33.4126663208008	33.2843284606934	33.1929397583008	33.2842903137207	33.2542839050293	33.2636833190918	33.3389129638672				18	18	11	65,5	65,5	48,3	35,836	0	323,31	1290800000000	11679	P00355	P00355
22.2291984558105	22.3091621398926	22.0189628601074	21.72678565979	22.1267700195313	22.2762432098389	22.451000213623	22.1590061187744	21.9785442352295	21.8815174102783	22.5336799621582	22.3520851135254	22.3139362335205	22.8409328460693	22.3992805480957	23.0178031921387	22.0911407470703	22.0101070404053	22.7609958648682	22.4114685058594	23.9286613464355	23.4121341705322				4	4	4	31,7	31,7	31,7	21,455	0	28,993	649000000	75	P00377;P00374	P00377
22.7660980224609	23.2631435394287	23.2055721282959	22.8931941986084	22.9020500183105	23.01881980896	22.824031829834	23.1189250946045	22.9981670379639	22.8428840637207	22.9525756835938	22.8895950317383	22.9326057434082	22.977014541626	23.0519599914551	23.0627384185791	23.0238170623779	23.4860153198242	23.1023960113525	23.0130348205566	23.1751365661621	23.0266532897949				3	3	3	10,9	10,9	10,9	47,267	0	22,433	920490000	89	P00390-5;P00390-4;P00390-2;P00390-3;P00390	P00390-5;P00390-4;P00390-2;P00390-3;P00390	Glutathione reductase, mitochondrial	GSR
24.3447971343994	24.6907749176025	22.590892791748	23.4494400024414	22.4180564880371	22.0111465454102	22.6574115753174	23.5109806060791	24.1876029968262	23.0532665252686	23.1708869934082	21.766321182251	26.3073959350586	23.7933464050293	25.0508251190186	23.9249782562256	22.6015720367432	21.9206619262695	23.8930549621582	21.515209197998	24.0840606689453	22.3160037994385				7	7	7	7,6	7,6	7,6	122,2	0	35,464	1563600000	102	P00450;CON__ENSEMBL:ENSBTAP00000031900	P00450	Ceruloplasmin	CP
26.8234367370605	26.6806659698486	27.2713947296143	26.7372379302979	26.5409164428711	26.8892364501953	26.8244361877441	26.9261093139648	26.5802211761475	26.563102722168	26.9617385864258	27.0061264038086	26.8388900756836	26.4198589324951	26.421854019165	26.6061344146729	26.8372268676758	26.5342082977295	26.8140811920166	26.655782699585	26.623592376709	26.6179008483887				5	5	5	24,2	24,2	24,2	32,118	0	104,06	12445000000	528	P00491	P00491	Purine nucleoside phosphorylase	PNP
30.2195892333984	30.2046051025391	30.1259078979492	30.0967197418213	30.0389137268066	30.2666130065918	30.206226348877	30.2169990539551	30.2696685791016	30.4150238037109	30.2188587188721	30.4406814575195	29.933126449585	30.276891708374	29.9209499359131	30.0824947357178	30.4388885498047	30.4902496337891	29.663990020752	30.190185546875	29.89084815979	30.3145351409912				19	19	19	63,2	63,2	63,2	46,474	0	323,31	134190000000	1987	P00503;P17174;P17174-2	P00503
31.7828044891357	31.5986461639404	31.7917308807373	31.7330055236816	31.7854995727539	31.6951351165771	32.0971374511719	32.0336418151855	31.8606452941895	31.846321105957	31.7499313354492	31.7886505126953	31.1985511779785	31.5196914672852	31.4031982421875	31.4307537078857	31.985523223877	31.604736328125	31.7792491912842	31.845911026001	31.4731140136719	31.6181449890137				30	30	30	81,6	81,6	81,6	47,436	0	323,31	399730000000	4047	P00506;P00505;P00505-2	P00506
26.9985065460205	27.2067642211914	27.1283321380615	26.924259185791	26.9488563537598	27.016284942627	27.0547370910645	27.0699882507324	26.7488040924072	27.2368659973145	27.2131023406982	26.9441947937012	26.7212448120117	26.8113212585449	26.9524173736572	26.8848304748535	27.375659942627	27.5468864440918	26.6361522674561	27.1062107086182	26.8357563018799	27.1389083862305				10	10	9	56,7	56,7	52,1	21,639	0	81,148	15534000000	561	P00571;P00568;Q9Y6K8-2	P00571;P00568	Adenylate kinase isoenzyme 1	AK1
29.8921089172363	29.9451580047607	29.4666500091553	29.9892292022705	29.8364219665527	29.8154640197754	29.8184547424316	29.6245460510254	29.7900924682617	29.7374515533447	29.7187213897705	29.6675415039063	30.1132640838623	29.8754692077637	30.8049850463867	30.2586479187012	29.8208103179932	29.7914657592773	30.200101852417	29.5617084503174	30.300910949707	29.7672882080078				11	11	11	35,9	35,9	35,9	37,294	0	128,25	114500000000	960	P00795;P07339	P00795
29.5807704925537	29.4398517608643	29.7040977478027	29.661548614502	29.6984233856201	29.7321453094482	29.8525524139404	29.6811847686768	29.804105758667	29.5882148742676	29.9097003936768	29.7974758148193	29.7275772094727	29.7326240539551	29.1581687927246	29.471321105957	29.8148326873779	29.752815246582	29.4405822753906	29.7116012573242	29.4986591339111	29.7051296234131				12	12	4	41,2	41,2	24,4	51,629	0	166,85	94479000000	997	P00889	P00889
20.9247283935547	19.3295249938965	20.1087474822998	NaN	20.0076961517334	20.1763343811035	20.4312953948975	20.2357215881348	19.7438011169434	NaN	21.0598316192627	19.4378452301025	25.7488822937012	20.0692539215088	21.288257598877	22.0701637268066	16.6591320037842	18.5694885253906	20.5528259277344	19.7210884094238	21.1530437469482	19.2561264038086				3	3	3	20,3	20,3	20,3	28,87	0	15,28	364050000	70	P00915	P00915	Carbonic anhydrase 1	CA1
26.4366130828857	26.329517364502	26.7985782623291	26.5068264007568	26.8438339233398	27.0059833526611	26.6644325256348	26.2045917510986	26.5705242156982	26.4908676147461	26.5370502471924	26.2653388977051	27.0933246612549	26.0505905151367	26.4848957061768	26.383659362793	26.3590965270996	26.1397151947021	26.2895202636719	26.3087501525879	26.2146015167236	26.6287422180176				3	3	3	8,8	8,8	8,8	29,246	0	36,134	10720000000	431	P00918	P00918	Carbonic anhydrase 2	CA2
26.8948287963867	27.767557144165	25.2482795715332	26.5336627960205	25.7502574920654	24.5560665130615	24.8680210113525	26.1252136230469	27.6509075164795	26.9726886749268	25.970775604248	25.1344318389893	29.4393730163574	27.5127429962158	27.97216796875	26.474250793457	23.782320022583	24.3247470855713	26.5087738037109	24.7658996582031	27.0263328552246	25.2531108856201				35	35	33	32,5	32,5	31,2	186,8	0	323,31	13349000000	1013	P01025;CON__Q2UVX4	P01025
27.9178733825684	29.0541934967041	26.5785255432129	27.6132869720459	27.1440010070801	26.5010280609131	26.9811477661133	28.1602153778076	28.0546722412109	27.6989555358887	27.0628509521484	27.0556564331055	29.7321128845215	28.384241104126	29.1439304351807	28.2789001464844	26.4611072540283	26.8102378845215	27.9954147338867	27.4442043304443	28.0372085571289	27.0109329223633				5	5	5	76,2	76,2	76,2	11,003	0	201,14	30946000000	1057	P01846	P01846
32.1530494689941	31.5655269622803	32.2128601074219	31.8807640075684	32.3786849975586	31.6262798309326	31.9633560180664	31.8048496246338	32.1842079162598	31.9250564575195	33.0458526611328	32.1652641296387	34.5700454711914	31.5559959411621	32.9613800048828	33.3700866699219	31.2754669189453	31.0899543762207	31.8610782623291	31.414665222168	32.3297729492188	31.1818675994873				10	10	10	83,7	83,7	83,7	15,039	0	323,31	710300000000	5848	P01965;CON__P01966;P69905;P02009;P02008	P01965
32.8680725097656	32.0331039428711	32.9025764465332	32.1965026855469	32.7349891662598	32.0006484985352	32.6815567016602	32.2902336120605	32.9025039672852	32.5046234130859	33.9490814208984	32.4410781860352	35.3849029541016	32.146915435791	33.6419296264648	34.1427307128906	31.7693691253662	31.7560920715332	32.6042556762695	31.7104187011719	33.2872695922852	31.7206039428711				13	13	11	72,8	72,8	57,8	16,165	0	323,31	1026300000000	4372	P02067;P68871;P04246;P02101;P69892;P69891;P02100	P02067
31.8291625976563	31.780309677124	31.9528789520264	31.754732131958	32.184642791748	31.6783714294434	31.7128067016602	31.7544593811035	32.4750061035156	32.1545219421387	32.4658470153809	31.8980846405029	32.9844932556152	31.9300098419189	33.4593200683594	32.8650665283203	32.1585388183594	31.8991546630859	33.1559982299805	32.0961074829102	33.196647644043	32.3884582519531				42	42	34	73,6	73,6	60,5	53,667	0	323,31	658360000000	11934	P02543;P08670	P02543;P08670	Vimentin	VIM
29.0220909118652	29.1379585266113	28.4913387298584	28.7633666992188	28.9164142608643	28.6831092834473	28.5671272277832	28.8935298919678	28.5325126647949	28.6833171844482	28.4529647827148	28.6797122955322	28.3033428192139	28.503490447998	28.4843635559082	28.6911392211914	28.9083194732666	28.8229522705078	28.2422790527344	28.7118244171143	28.3550357818604	28.5588340759277				23	22	6	46,6	46,6	12,9	62,071	0	323,31	49132000000	1863	P02547	P02547
24.5551071166992	26.3157367706299	24.227575302124	23.8438034057617	24.0585441589355	22.5481433868408	23.5365829467773	23.3109970092773	25.3045444488525	24.633918762207	24.5125427246094	23.6679706573486	27.5025024414063	25.2803802490234	28.502555847168	25.5363540649414	23.4851760864258	22.9812870025635	25.5237922668457	22.9104270935059	25.7979564666748	24.5329513549805				3	2	2	8,4	6,3	6,3	55,928	0	166,62	5577200000	310	P02675	P02675	Fibrinogen beta chain;Fibrinopeptide B;Fibrinogen beta chain	FGB
25.8626022338867	26.693962097168	24.2205505371094	24.7521495819092	24.4684791564941	24.1441917419434	23.9456787109375	23.9869976043701	25.9570693969727	25.685962677002	25.0753154754639	24.5215091705322	27.6534767150879	25.5183696746826	28.6746940612793	26.6148796081543	24.1123332977295	24.0104579925537	26.2294464111328	23.6673793792725	26.3295135498047	25.1012649536133				2	2	2	6,2	6,2	6,2	49,496	0	83,662	7242500000	140	P02679-2;P02679	P02679-2;P02679	Fibrinogen gamma chain	FGG
24.6223239898682	26.0991897583008	23.7488746643066	22.8113403320313	24.0210514068604	22.8579158782959	23.3992176055908	21.9870719909668	24.7383785247803	24.3493843078613	24.1755638122559	22.8901672363281	26.7561073303223	24.4162864685059	27.9157447814941	25.8946952819824	21.8819561004639	22.4374866485596	25.7352275848389	22.705249786377	25.3926124572754	22.8013534545898				18	18	18	12,8	12,8	12,8	262,62	0	323,31	3945800000	406	P02751-1;P02751-6;P02751-5;P02751-3;P02751-17;P02751;P02751-8;P02751-7;P02751-11;P02751-14;P02751-9;P02751-10;P02751-4;P02751-13;P02751-12;P02751-16;P02751-2	P02751-1;P02751-6;P02751-5;P02751-3;P02751-17;P02751;P02751-8;P02751-7;P02751-11;P02751-14;P02751-9;P02751-10;P02751-4;P02751-13;P02751-12	Fibronectin;Anastellin;Ugl-Y1;Ugl-Y2;Ugl-Y3	FN1
20.5420360565186	21.183500289917	20.2791595458984	21.0022583007813	21.0400714874268	19.0864582061768	20.7883739471436	20.4093055725098	21.1114559173584	NaN	21.8462371826172	20.4500751495361	21.9031543731689	20.8934135437012	22.2136631011963	21.6899757385254	20.2930126190186	20.6621360778809	21.4826812744141	20.0636978149414	21.1667881011963	20.5240898132324				2	2	2	9,8	9,8	9,8	21,225	0	4,793	180760000	89	P02794	P02794	Ferritin heavy chain;Ferritin heavy chain, N-terminally processed	FTH1
23.2021350860596	23.3537368774414	23.0210838317871	23.4321212768555	23.7734985351563	22.9436492919922	23.6767997741699	23.5893783569336	23.0338706970215	23.3363952636719	23.4443817138672	23.0787811279297	22.8579425811768	23.4390907287598	22.6684589385986	22.7485504150391	23.4232082366943	23.300350189209	22.7233047485352	23.0296039581299	22.1786422729492	22.7957954406738				2	2	2	10,1	10,1	10,1	39,135	0	12,327	908230000	94	P03999	P03999	Short-wave-sensitive opsin 1	OPN1SW
22.8935298919678	22.8600082397461	22.6352958679199	22.9335327148438	22.6262035369873	22.4686546325684	23.0195693969727	22.7012634277344	22.2790794372559	22.3327312469482	22.617359161377	22.820837020874	22.717212677002	22.5755081176758	22.7647666931152	23.1895236968994	22.9224300384521	22.8634929656982	22.860071182251	22.5994358062744	23.1323738098145	22.9681739807129				2	2	2	4,7	4,7	4,7	53,688	0	4,4006	707730000	77	P04066	P04066	Tissue alpha-L-fucosidase	FUCA1
29.9447956085205	29.6400680541992	29.4929027557373	29.6388416290283	29.7395534515381	29.6888999938965	29.8163223266602	29.6711730957031	30.197998046875	30.080509185791	29.807466506958	30.1406097412109	30.0692081451416	29.7897453308105	29.6356163024902	29.9461898803711	29.8393802642822	29.731861114502	29.5805854797363	29.5973720550537	29.874568939209	29.6297645568848				16	13	13	59,6	50	50	39,42	0	230,13	105330000000	1087	P04075;P04075-2	P04075;P04075-2	Fructose-bisphosphate aldolase A	ALDOA
21.5253047943115	21.6585693359375	NaN	22.8733501434326	21.8219146728516	NaN	21.2586841583252	20.8439254760742	22.4368991851807	21.3611583709717	22.0306282043457	22.5835952758789	NaN	21.9929294586182	22.8648338317871	22.543041229248	21.5571765899658	21.3339080810547	22.6036014556885	20.9174327850342	22.397819519043	21.6294994354248				2	2	2	35,4	35,4	35,4	11,075	0	6,2934	231000000	44	P04163;P60903	P04163;P60903	Protein S100-A10	S100A10
23.9606437683105	23.7574462890625	24.1835060119629	23.8772163391113	23.7295150756836	23.7865409851074	23.7461986541748	23.9336318969727	24.0004482269287	23.678991317749	23.7476444244385	23.4569854736328	23.7933731079102	23.886754989624	23.829309463501	23.8355922698975	24.0829467773438	24.5487670898438	23.5939273834229	24.0383110046387	23.7301445007324	23.6122627258301				8	8	8	18,9	18,9	18,9	76,832	0	49,525	1753200000	238	P04175;P16435	P04175
29.3625068664551	29.4280605316162	29.5614490509033	29.6112232208252	29.4382286071777	29.4185371398926	29.5613975524902	29.4995784759521	29.5352306365967	29.6364440917969	29.3488674163818	29.5851802825928	29.3986797332764	29.5118503570557	29.3370170593262	29.5227108001709	29.4712028503418	29.5250053405762	29.5086898803711	29.6606025695801	29.4406661987305	29.5372791290283				9	9	9	75,8	75,8	75,8	15,892	0	228,97	85156000000	1558	P04178	P04178
20.2067928314209	19.7883739471436	21.1506652832031	20.0993061065674	20.5439720153809	19.9450492858887	20.2483329772949	19.9550113677979	19.8324565887451	20.0499649047852	20.0887298583984	20.2069435119629	19.6845741271973	20.1336669921875	20.5339050292969	20.477424621582	20.177453994751	19.9334259033203	19.9570636749268	19.5033264160156	20.4142570495605	20.0976524353027				2	2	2	7,1	7,1	7,1	48,534	0	5,8011	110530000	103	P04181	P04181	Ornithine aminotransferase, mitochondrial;Ornithine aminotransferase, hepatic form;Ornithine aminotransferase, renal form	OAT
25.7152671813965	25.677770614624	25.9933757781982	26.145040512085	26.0677623748779	25.769157409668	25.7132873535156	25.6150074005127	25.6544036865234	25.5861167907715	25.5475959777832	25.2002086639404	25.720739364624	25.7049198150635	25.4334297180176	25.8204193115234	25.7124137878418	25.8803806304932	25.4146423339844	26.0118522644043	25.1727714538574	25.8510799407959				2	2	2	14,9	14,9	14,9	17,935	0	195,49	6563700000	213	P04216	P04216	Thy-1 membrane glycoprotein	THY1
28.9691429138184	28.7426071166992	28.5081596374512	29.2319717407227	28.720287322998	28.9035911560059	28.975118637085	28.9784889221191	28.6084251403809	28.7110366821289	28.4798889160156	28.9521160125732	28.1092433929443	28.5785694122314	27.8224391937256	28.1389465332031	28.7938060760498	28.9716835021973	27.8595142364502	28.83251953125	28.4400081634521	28.7387714385986				26	6	4	74,8	14,6	10,4	49,585	0	323,31	49399000000	685	P04350	P04350	Tubulin beta-4A chain	TUBB4A
23.4518203735352	25.4767456054688	22.7166748046875	23.0265445709229	22.1305198669434	22.5252075195313	22.4568290710449	24.4932231903076	24.5796203613281	24.2287521362305	21.7169094085693	21.5237274169922	26.1575222015381	25.220703125	24.846565246582	23.3432712554932	NaN	21.6262702941895	23.9032783508301	22.8991737365723	24.2634544372559	23.1857299804688				6	6	6	26,1	26,1	26,1	37,69	0	70,338	1757700000	166	P04366	P04366
22.7362155914307	23.252628326416	20.5510292053223	22.5276432037354	22.5386085510254	NaN	22.4071826934814	22.7827281951904	23.0093555450439	23.1338176727295	22.6597328186035	22.5431461334229	23.7589931488037	22.8814830780029	23.5313739776611	23.4674263000488	21.040060043335	23.0543098449707	23.9718322753906	23.3403911590576	23.5270671844482	22.5657997131348				2	2	2	7,3	7,3	7,3	41,394	0	73,001	716410000	80	P04439-2;P04439;P01893	P04439-2;P04439;P01893	HLA class I histocompatibility antigen, A-3 alpha chain;Putative HLA class I histocompatibility antigen, alpha chain H	HLA-A;HLA-H
25.699821472168	25.3347454071045	25.7241458892822	24.8641586303711	24.7320938110352	25.4980621337891	25.561710357666	25.3390579223633	25.2624416351318	26.1316165924072	25.8107643127441	25.556697845459	25.6396636962891	25.7075653076172	25.7836284637451	25.4776134490967	25.9313468933105	25.6973781585693	26.1574420928955	25.9618797302246	25.7056789398193	25.8145503997803				5	5	5	50,8	50,8	50,8	28,068	0	201,23	6013400000	396	P04574;P04632	P04574;P04632	Calpain small subunit 1	CAPNS1
27.2765464782715	27.2722969055176	27.2978496551514	27.3366851806641	27.6406593322754	27.4532089233398	27.1536178588867	27.3875312805176	27.3524494171143	27.1535930633545	27.3267345428467	26.9948406219482	27.6476383209229	27.2942657470703	27.5815525054932	27.5102424621582	27.354455947876	27.3939037322998	27.6762351989746	27.2312965393066	27.4559707641602	27.3176383972168				12	9	7	45,9	37,2	29,3	40,45	0	323,31	19168000000	654	P04899;P04899-6;P04899-3;P04899-5;P04899-2;P04899-4	P04899;P04899-6;P04899-3;P04899-5;P04899-2;P04899-4	Guanine nucleotide-binding protein G(i) subunit alpha-2	GNAI2
28.2644996643066	28.2743797302246	28.1132106781006	28.3025894165039	28.1650543212891	28.0512599945068	28.104248046875	28.1863994598389	28.0834407806396	28.1339225769043	27.8321990966797	28.1219139099121	27.3808746337891	28.1300811767578	27.2217426300049	27.8183479309082	28.0732040405273	27.9621906280518	27.8479290008545	28.0956535339355	27.4754886627197	27.9206008911133				9	9	9	38	38	38	35,158	0	227,76	30957000000	869	P05027;P05026-2;P05026	P05027
30.7738094329834	30.6928386688232	30.8505744934082	30.8635787963867	30.8271064758301	30.6095142364502	30.7536010742188	30.742000579834	30.8094253540039	30.7201271057129	30.6922607421875	30.977912902832	30.2325630187988	30.7382183074951	30.0047206878662	30.7800178527832	30.7936267852783	30.7543144226074	30.4630794525146	30.7119483947754	30.4363479614258	30.6384620666504				15	15	7	42,3	42,3	19,8	32,852	0	230,33	196320000000	2068	P05141;Q9H0C2	P05141	ADP/ATP translocase 2;ADP/ATP translocase 2, N-terminally processed	SLC25A5
23.2081604003906	22.791166305542	22.8172397613525	23.001974105835	22.4362335205078	23.0581512451172	22.6763820648193	23.2688636779785	20.5944309234619	23.2089614868164	22.3872547149658	22.7467193603516	22.2727165222168	21.3892421722412	22.3612499237061	22.2755489349365	22.4576892852783	22.7591152191162	22.6994762420654	22.5907402038574	22.5546855926514	22.8115100860596				5	2	2	12,3	4,4	4,4	75,001	0,0069376	1,8675	438910000	47	P05165-3;P05165-2;P05165	P05165-3;P05165-2;P05165	Propionyl-CoA carboxylase alpha chain, mitochondrial	PCCA
19.8948059082031	19.9464950561523	20.4573020935059	20.7835025787354	21.3211936950684	20.2030715942383	20.2824630737305	20.2045021057129	20.7909488677979	20.819507598877	20.1946582794189	21.4780693054199	21.2123794555664	21.7837295532227	20.4298095703125	20.1455688476563	20.8128147125244	19.5380306243896	20.60276222229	19.5107097625732	20.9244251251221	20.6839904785156				3	3	3	7,8	7,8	7,8	57,304	0	26,147	119970000	53	P05186;P05186-2;P05186-3	P05186;P05186-2;P05186-3	Alkaline phosphatase, tissue-nonspecific isozyme	ALPL
23.5825958251953	23.0372829437256	23.2365760803223	23.0231800079346	22.9312934875488	22.9706783294678	22.8205032348633	22.756383895874	23.2321548461914	23.1443176269531	23.5650997161865	23.3143482208252	23.535572052002	22.5831699371338	23.44287109375	23.6661510467529	22.5715770721436	23.2442474365234	23.4093437194824	22.7423419952393	23.057767868042	22.476863861084				7	7	7	27,9	27,9	27,9	36,112	0	63,663	975340000	181	P05198;P20460	P05198	Eukaryotic translation initiation factor 2 subunit 1	EIF2S1
24.8407020568848	25.0455780029297	25.0058517456055	25.2375564575195	24.9302959442139	25.1427307128906	25.0034599304199	25.2519664764404	25.0258541107178	25.2923545837402	25.15891456604	25.1065044403076	24.5978698730469	25.1406993865967	25.0123863220215	24.7101211547852	25.0690288543701	24.9055290222168	24.6957607269287	24.877799987793	24.9715709686279	25.1442737579346				8	4	4	27,1	15,1	15,1	40,593	0	56,631	3741500000	312	P05383;P22694-4;P22694-3;P22694;P22694-5;P22694-7;P22694-6;P22694-9;P22694-2;P22694-10;P22694-8	P05383;P22694-4;P22694-3;P22694;P22694-5;P22694-7;P22694-6;P22694-9;P22694-2;P22694-10	cAMP-dependent protein kinase catalytic subunit beta	PRKACB
25.7577648162842	26.214412689209	26.2480926513672	25.8233108520508	25.4304180145264	25.8709373474121	26.0599384307861	26.1867256164551	25.8551445007324	26.1765880584717	25.6930541992188	26.1287574768066	25.0322532653809	25.7738399505615	25.4527797698975	25.0279235839844	25.3936958312988	25.3892650604248	25.2438430786133	25.9042167663574	25.4381141662598	24.9549198150635				3	3	3	37,7	37,7	37,7	11,514	0	26,305	6113600000	191	P05386	P05386	60S acidic ribosomal protein P1	RPLP1
27.9758911132813	28.2492961883545	28.0238838195801	28.2202301025391	28.1339302062988	28.1117210388184	27.8109664916992	28.0740642547607	28.2335929870605	27.7052211761475	28.3726043701172	28.0214405059814	28.1062183380127	28.0408134460449	27.9903793334961	27.9818115234375	27.8176460266113	27.8333053588867	28.0919647216797	28.1707820892334	28.0350704193115	28.1481685638428				6	6	5	54,8	54,8	44,3	11,665	0	103,76	30914000000	489	P05387	P05387	60S acidic ribosomal protein P2	RPLP2
24.5078182220459	24.3658638000488	24.401180267334	23.5973014831543	24.025203704834	24.0295886993408	24.1290168762207	24.0815963745117	23.5546131134033	23.8087196350098	23.3375968933105	23.7216949462891	23.7575435638428	24.3227672576904	24.3520488739014	24.6112670898438	24.0704956054688	23.8181133270264	24.3528060913086	23.6499252319336	23.9396820068359	24.1567630767822				3	3	3	10,8	10,8	10,8	46,836	0	6,6035	1743900000	106	P05455	P05455	Lupus La protein	SSB
26.7881164550781	26.8595523834229	26.7548313140869	26.7292251586914	26.544584274292	26.8948917388916	26.7363605499268	26.7891998291016	26.6333312988281	26.7509765625	26.6237983703613	26.9843997955322	26.6274528503418	26.8109855651855	25.9481353759766	26.8199424743652	26.9208717346191	27.105411529541	25.9972171783447	26.6670036315918	25.9431915283203	26.8808784484863				7	6	6	29,1	24,9	24,9	30,025	0	288,46	12131000000	413	P05937;P05937-2	P05937;P05937-2	Calbindin	CALB1
22.264575958252	22.1447563171387	22.4796295166016	22.5898170471191	22.0581970214844	22.3319549560547	21.8693199157715	22.3755989074707	22.1320304870605	22.3471832275391	21.9375343322754	22.061897277832	22.4867458343506	21.7726001739502	21.7467346191406	22.0786361694336	21.6265182495117	22.1038665771484	22.11110496521	22.0229511260986	21.8524684906006	21.5392570495605				2	2	2	6,3	6,3	6,3	40,786	0	34,41	409420000	85	P06132	P06132	Uroporphyrinogen decarboxylase	UROD
20.6975975036621	20.8068466186523	20.3312206268311	20.7315483093262	21.0628089904785	20.5246543884277	20.6328887939453	20.4815120697021	20.5384006500244	20.7674541473389	20.3546943664551	20.9093971252441	20.5165672302246	20.7125797271729	21.1993808746338	21.0030288696289	20.641544342041	20.1674728393555	20.8673210144043	21.2337989807129	20.7048892974854	20.6448879241943				3	3	3	4,1	4,1	4,1	155,14	0	46,604	135040000	66	P06213-2;P06213	P06213-2;P06213	Insulin receptor;Insulin receptor subunit alpha;Insulin receptor subunit beta	INSR
22.0751037597656	NaN	21.4330940246582	22.1264400482178	22.1999015808105	21.9777450561523	22.0997009277344	22.0219955444336	21.8209247589111	22.5070266723633	22.0866451263428	21.6171054840088	22.4850978851318	22.1559982299805	22.6135940551758	22.2691669464111	22.3826637268066	22.2156352996826	22.1414051055908	21.8452816009521	22.8141746520996	22.3972473144531				2	2	2	4,5	4,5	4,5	68,417	0	3,9538	347120000	78	P06276	P06276	Cholinesterase	BCHE
22.6230354309082	22.166109085083	21.7676563262939	22.6959819793701	22.760181427002	22.1023788452148	22.6275844573975	22.8231430053711	22.3128356933594	22.5155067443848	22.5623779296875	22.3891086578369	22.6482849121094	22.1754169464111	22.7203731536865	23.203971862793	22.4754180908203	22.2001285552979	21.8126373291016	21.4882926940918	22.036304473877	22.0339736938477				2	2	2	6,8	6,8	6,8	48,766	0	6,2181	556100000	78	P06280	P06280	Alpha-galactosidase A	GLA
21.6650848388672	21.7797622680664	21.8301334381104	21.7861156463623	21.5620861053467	21.9898624420166	21.5923385620117	22.0185604095459	22.177059173584	21.4044418334961	22.1241512298584	22.1988582611084	21.034875869751	22.2811813354492	22.5492286682129	21.9443759918213	21.4048862457275	21.914363861084	21.7463474273682	21.7936820983887	22.4993877410889	22.3603229522705				2	2	2	15,5	15,5	15,5	12,074	0	61,352	393190000	104	P06454-2;P06454	P06454-2;P06454	Prothymosin alpha;Prothymosin alpha, N-terminally processed;Thymosin alpha-1	PTMA
32.6927528381348	32.7105026245117	32.7513809204102	32.6049537658691	32.7354354858398	32.6760559082031	32.8701858520508	32.7502212524414	32.5904846191406	32.6870651245117	32.7096138000488	32.7002944946289	32.4689826965332	32.6591873168945	32.2234497070313	32.5624618530273	32.6007690429688	32.7552108764648	32.3670501708984	32.71728515625	32.6002655029297	32.8129959106445				27	27	27	69,2	69,2	69,2	56,559	0	323,31	762230000000	5937	P06576	P06576	ATP synthase subunit beta, mitochondrial	ATP5B
33.1993408203125	33.0984191894531	33.2732124328613	33.0473709106445	33.1020240783691	33.1025543212891	33.2263793945313	33.1696243286133	33.4670791625977	33.4450416564941	33.3001251220703	33.1613006591797	33.323844909668	33.3608627319336	33.3469619750977	33.4223747253418	33.1791000366211	33.2680511474609	33.4855346679688	33.2318153381348	33.3900756835938	33.1636848449707				20	20	15	42,9	42,9	32,3	47,168	0	323,31	1183400000000	11255	P06733;P06733-2	P06733;P06733-2	Alpha-enolase	ENO1
26.8938331604004	26.8080101013184	27.103702545166	26.7798652648926	27.0754356384277	27.0658397674561	26.6809825897217	27.0244903564453	27.0399780273438	26.9123954772949	26.9770469665527	26.8969459533691	27.182544708252	26.8779258728027	27.1943092346191	26.9154796600342	26.8250789642334	26.7552947998047	27.1809730529785	26.9064712524414	27.1977996826172	27.0694618225098				11	8	8	19,1	13,9	13,9	93,133	0	191	14453000000	575	P06737-2;P06737	P06737-2;P06737	Glycogen phosphorylase, liver form	PYGL
29.0648593902588	28.7305564880371	28.3619194030762	28.636287689209	28.5093860626221	28.718189239502	28.6901988983154	28.6554164886475	28.4922218322754	28.5612831115723	28.6379070281982	28.7122917175293	28.5888671875	28.8939056396484	28.7326068878174	28.7437782287598	28.647439956665	28.8309326171875	28.7119255065918	28.7087421417236	28.7833366394043	28.7267169952393				8	8	8	47,3	47,3	47,3	32,575	0	305,33	48404000000	782	P06748;P06748-2;P06748-3	P06748;P06748-2;P06748-3	Nucleophosmin	NPM1
24.810546875	24.6308078765869	24.8224487304688	24.719388961792	25.0725479125977	24.6600704193115	24.689359664917	24.6741027832031	24.6965637207031	24.3143100738525	24.645206451416	24.6100730895996	24.4690170288086	24.824104309082	24.7459678649902	24.8391017913818	24.5351257324219	24.8002624511719	24.9451465606689	24.6343727111816	24.8340225219727	24.6268367767334				7	7	7	10,8	10,8	10,8	111,13	0	72,114	3118300000	383	P06756-3;P06756-2;P06756	P06756-3;P06756-2;P06756	Integrin alpha-V;Integrin alpha-V heavy chain;Integrin alpha-V light chain	ITGAV
26.1129722595215	26.439266204834	24.2572441101074	24.3581848144531	25.1324348449707	23.0509052276611	24.773265838623	25.1197490692139	26.5544338226318	25.2947959899902	25.5448341369629	21.3873538970947	27.832691192627	25.4976768493652	27.4827423095703	26.3078079223633	23.0134983062744	22.8568954467773	26.7697429656982	23.3477687835693	26.0378074645996	22.0328598022461				17	17	17	37,9	37,9	37,9	90,614	0	235,97	6256500000	570	P06867;CON__P06868	P06867
32.6904945373535	33.1736145019531	32.1640663146973	32.4879837036133	33.0632667541504	32.9718627929688	32.413387298584	32.5909233093262	32.8633880615234	32.3976593017578	32.7079315185547	32.4616355895996	32.5888404846191	32.8706588745117	32.2500305175781	32.63037109375	32.7150039672852	32.5017013549805	32.1919403076172	32.5891761779785	32.9747505187988	32.7173843383789				7	7	2	47,6	47,6	7,9	13,92	0	160,16	817930000000	2221	Q16778;P33778;P23527;P06899;Q8N257;Q6DRA6;Q6DN03	Q16778;P33778;P23527;P06899;Q8N257	Histone H2B type 2-E;Histone H2B type 1-B;Histone H2B type 1-O;Histone H2B type 1-J;Histone H2B type 3-B	HIST2H2BE;HIST1H2BB;HIST1H2BO;HIST1H2BJ;HIST3H2BB
26.8461589813232	27.1260528564453	26.5212383270264	26.5609111785889	26.8092193603516	26.9130325317383	26.7814903259277	27.0449066162109	26.4003295898438	26.6508274078369	26.420280456543	26.7292518615723	26.1071586608887	26.4990119934082	26.2733745574951	26.8808670043945	26.6745777130127	26.9017066955566	26.1179943084717	26.6064224243164	26.0744743347168	26.6363792419434				22	5	5	44,2	10,1	10,1	61,516	0	87,448	11840000000	364	P07196	P07196	Neurofilament light polypeptide	NEFL
28.6533737182617	28.8847198486328	28.1341590881348	28.3025817871094	28.4538593292236	28.533618927002	28.320915222168	28.4899387359619	28.1616497039795	28.1536808013916	28.0940113067627	28.2740516662598	27.9292602539063	28.0873870849609	27.7987003326416	28.6745185852051	28.6175174713135	28.5266990661621	27.8277606964111	28.189920425415	27.8693809509277	27.9181480407715				17	14	3	20,1	17,6	3,6	102,47	0	166,6	37536000000	840	P07197;P07197-2	P07197	Neurofilament medium polypeptide	NEFM
27.3184032440186	27.2907485961914	27.5035839080811	27.3275413513184	27.7055053710938	27.3430404663086	27.3951187133789	27.2928333282471	27.4817314147949	27.3136882781982	27.6415691375732	27.4360160827637	27.3819904327393	27.4949169158936	28.077938079834	27.7829399108887	27.6188259124756	27.5509376525879	27.5724754333496	27.3147029876709	27.7512683868408	27.5185317993164				8	8	8	18,5	18,5	18,5	57,116	0	323,31	20967000000	888	P07237	P07237	Protein disulfide-isomerase	P4HB
28.1804885864258	28.0085525512695	27.8032989501953	27.9180870056152	28.0647888183594	28.0946159362793	28.0509738922119	28.1710548400879	27.9826126098633	27.9084529876709	28.218822479248	28.2106285095215	28.1000461578369	28.3382797241211	27.5696487426758	28.0026073455811	28.0252170562744	27.8878364562988	27.692253112793	27.8843383789063	28.0035419464111	28.1448516845703				3	3	3	13	13	13	19,167	0	44,08	32589000000	580	P07305-2;P07305	P07305-2;P07305	Histone H1.0;Histone H1.0, N-terminally processed	H1F0
30.5632724761963	30.6619606018066	30.4028644561768	30.5447692871094	30.5842475891113	30.5496234893799	30.6465377807617	30.5759334564209	30.4500293731689	30.6723442077637	30.4374809265137	30.6589107513428	30.8319835662842	30.469612121582	30.691333770752	30.5560913085938	30.6430549621582	30.722053527832	30.5579261779785	30.5840930938721	30.4897308349609	30.5648899078369				25	5	5	70,5	16,2	16,2	49,67	0	323,31	188740000000	1528	Q767L7;P07437	Q767L7;P07437	Tubulin beta chain	TUBB
24.6014823913574	24.4094944000244	24.7052154541016	24.3221740722656	24.5628814697266	24.1742839813232	24.3730354309082	24.378381729126	24.2808399200439	24.8294658660889	24.3290977478027	24.89040184021	24.228099822998	23.9208393096924	24.2140884399414	24.1188278198242	24.7806720733643	24.2173404693604	23.6297950744629	24.0765590667725	24.1935367584229	24.4304161071777				4	4	4	14,5	14,5	14,5	42,921	0	155,46	2406300000	146	P07802;P10644;P10644-2	P07802;P10644;P10644-2	cAMP-dependent protein kinase type I-alpha regulatory subunit;cAMP-dependent protein kinase type I-alpha regulatory subunit, N-terminally processed	PRKAR1A
24.5034637451172	24.4839096069336	24.3030700683594	24.5234394073486	24.3139495849609	24.7625007629395	24.4584884643555	24.7156963348389	24.5588607788086	24.3947353363037	24.5831127166748	24.6117267608643	24.5887870788574	24.7911777496338	24.9498672485352	24.6340789794922	24.7272262573242	24.3137493133545	24.4899654388428	24.8647270202637	24.6702308654785	24.629186630249				8	8	8	7,4	7,4	7,4	170,59	0	58,84	3007100000	327	P07814	P07814	Bifunctional glutamate/proline--tRNA ligase;Glutamate--tRNA ligase;Proline--tRNA ligase	EPRS
28.0248737335205	27.9883193969727	27.8917598724365	27.9868927001953	28.0017127990723	27.8856105804443	28.1408863067627	28.1975288391113	27.9290199279785	27.847354888916	28.1500701904297	28.1220436096191	27.9391784667969	27.9920883178711	28.2648277282715	28.0994472503662	28.0998573303223	27.8817653656006	27.7905521392822	28.0088844299316	28.1004180908203	28.0983638763428				8	8	8	30,4	30,4	30,4	27,821	0	282,59	30635000000	817	P07910-4;P07910-2;P07910;P0DMR1;O60812;B7ZW38;B2RXH8;P07910-3	P07910-4;P07910-2;P07910;P0DMR1;O60812;B7ZW38;B2RXH8	Heterogeneous nuclear ribonucleoproteins C1/C2;Heterogeneous nuclear ribonucleoprotein C-like 4;Heterogeneous nuclear ribonucleoprotein C-like 1;Heterogeneous nuclear ribonucleoprotein C-like 3;Heterogeneous nuclear ribonucleoprotein C-like 2	HNRNPC;HNRNPCL4;HNRNPCL1;HNRNPCL3;HNRNPCL2
31.3872699737549	31.2429733276367	31.2944564819336	31.2193374633789	31.1920185089111	31.4047966003418	31.471508026123	31.4901714324951	31.5923156738281	31.5993804931641	31.4231834411621	31.6459789276123	31.5032081604004	31.5348014831543	31.1178016662598	31.3535022735596	31.2394180297852	31.3713722229004	31.1834144592285	31.2602787017822	31.3023052215576	31.4611110687256				25	25	16	60,2	60,2	39,4	63,125	0	323,31	314300000000	3338	P08059;CON__Q3ZBD7	P08059
26.3651123046875	26.5275382995605	26.4557418823242	26.4604797363281	26.5623340606689	26.6310615539551	26.3204784393311	26.3415775299072	26.2892990112305	26.2471237182617	26.2277584075928	26.2664775848389	26.1113834381104	26.3958110809326	26.2006225585938	26.203987121582	26.3348960876465	26.3000316619873	26.2845897674561	26.6911468505859	26.1310176849365	26.7974586486816				9	9	9	14,5	14,5	14,5	72,423	0	108,84	9842400000	462	P08133-2;P08133	P08133-2;P08133	Annexin A6	ANXA6
26.0298385620117	26.090446472168	26.0940227508545	26.0562953948975	26.2773971557617	26.2269878387451	26.2539520263672	25.7115077972412	26.2320690155029	25.9429969787598	25.9438552856445	25.5944881439209	26.2294540405273	26.2884674072266	26.3791809082031	26.4913234710693	26.3956489562988	26.1449699401855	26.3939933776855	26.10764503479	25.7666149139404	26.0253601074219				7	7	2	45,6	45,6	18,7	22,006	0	37,002	8330500000	390	P08134	P08134	Rho-related GTP-binding protein RhoC	RHOC
25.3352394104004	25.1363010406494	24.6657600402832	25.2373867034912	24.9685211181641	25.3002777099609	24.3738193511963	24.4699039459229	25.2600212097168	25.4739875793457	24.3229827880859	24.2695789337158	25.4819641113281	25.3845558166504	25.1367702484131	25.7487754821777	25.3668327331543	25.7859745025635	25.4670639038086	25.2512836456299	25.4932823181152	25.2693710327148				7	7	7	46,2	46,2	46,2	35,766	0	39,204	4254200000	351	P08138-2;P08138	P08138-2;P08138	Tumor necrosis factor receptor superfamily member 16	NGFR
22.1622772216797	21.9051570892334	22.3277854919434	22.2639198303223	22.1343727111816	21.5202445983887	21.6598320007324	21.9598255157471	22.0888576507568	21.8977108001709	21.6361312866211	22.0816059112549	21.0731773376465	21.4559650421143	21.0942344665527	21.7487354278564	21.8599853515625	22.0278587341309	21.6307792663574	21.4859447479248	21.7121028900146	21.4694366455078				19	2	2	36,6	2,4	2,4	81,775	0	11,363	368620000	99	P08237-2;P08237;P08237-3	P08237-2;P08237;P08237-3	ATP-dependent 6-phosphofructokinase, muscle type	PFKM
29.5248394012451	29.5976047515869	29.5195121765137	29.5221557617188	29.5266017913818	29.3530254364014	29.345085144043	29.6207218170166	29.5634822845459	29.5938472747803	29.423038482666	29.5840682983398	29.318531036377	29.4902839660645	29.5549583435059	29.5956516265869	29.5652980804443	29.372974395752	29.535343170166	29.4787158966064	29.6210060119629	29.6010417938232				25	12	11	40,2	22,1	20,7	83,263	0	323,31	92317000000	1341	P08238;Q58FF7	P08238	Heat shock protein HSP 90-beta	HSP90AB1
21.8656635284424	21.5987586975098	21.4526996612549	21.7836933135986	21.8707294464111	21.9432525634766	22.3076152801514	22.276481628418	22.5365257263184	22.0336418151855	22.3677463531494	22.2431316375732	22.5336322784424	22.4274959564209	22.1759643554688	21.8825645446777	22.5819263458252	22.2763423919678	22.7827548980713	22.4227409362793	22.2609424591064	22.4207210540771				6	6	6	16,9	16,9	16,9	66,558	0	18,816	491280000	109	P08240-2;P08240	P08240-2;P08240	Signal recognition particle receptor subunit alpha	SRPR
21.9861164093018	21.0629577636719	21.2973136901855	21.3104572296143	23.0893878936768	22.1347274780273	21.7398719787598	21.8578186035156	21.8726425170898	20.7372169494629	22.1786518096924	21.4386768341064	22.3450355529785	20.16090965271	22.3332023620605	22.0298194885254	21.8034820556641	22.7280807495117	22.0709133148193	21.8993282318115	22.7334518432617	22.5529251098633				3	3	3	9,2	9,2	9,2	54,817	0	14,348	288450000	60	P08243-3;P08243-2;P08243	P08243-3;P08243-2;P08243	Asparagine synthetase [glutamine-hydrolyzing]	ASNS
25.616455078125	26.0842761993408	25.6250610351563	25.9976844787598	25.9111080169678	25.682861328125	25.8727054595947	25.6755619049072	25.492603302002	25.2925262451172	25.7015419006348	25.4441223144531	25.8596305847168	25.968936920166	25.0754737854004	25.3728885650635	25.3592700958252	25.5636367797852	25.3665027618408	25.9977436065674	25.258903503418	25.6778717041016				3	3	3	13,4	13,4	13,4	33,845	0	5,9407	5813100000	94	P08247;P08247-2	P08247;P08247-2	Synaptophysin	SYP
26.7122993469238	26.4826831817627	26.6945686340332	26.6696720123291	26.7366714477539	26.5786476135254	26.4187660217285	26.7546997070313	26.6037082672119	26.8028621673584	26.3271064758301	26.7214775085449	26.0986347198486	26.5181274414063	26.117467880249	26.2290554046631	26.7313938140869	26.7104263305664	26.4568901062012	26.3669967651367	26.0993232727051	26.4990158081055				5	5	5	26,5	26,5	26,5	35,422	0	57,303	12222000000	696	P08574	P08574	Cytochrome c1, heme protein, mitochondrial	CYC1
24.1618766784668	23.9508686065674	23.6866207122803	23.8778324127197	23.7619915008545	23.5985450744629	23.5717067718506	23.8544521331787	23.8490619659424	23.6912078857422	23.5163402557373	23.9777660369873	23.5617332458496	23.8264293670654	23.787691116333	23.9187030792236	23.697437286377	23.8295555114746	23.5994110107422	23.6462097167969	23.1854152679443	24.0228786468506				3	2	2	19,1	15,6	15,6	25,486	0	21,147	1597500000	191	P08579	P08579	U2 small nuclear ribonucleoprotein B	SNRPB2
23.2939720153809	23.4085693359375	23.3932704925537	23.1353950500488	23.3028221130371	23.4241771697998	23.3226280212402	23.4640312194824	24.1606597900391	23.5088748931885	23.6351985931396	23.1642627716064	23.0956420898438	23.0628643035889	23.4160099029541	23.3481864929199	23.0070571899414	23.3991756439209	23.2254867553711	23.3559417724609	23.4691848754883	23.3670787811279				4	4	4	31,9	31,9	31,9	19,79	0	4,6138	1244900000	135	P08621-3;P08621-2;P08621	P08621-3;P08621-2;P08621	U1 small nuclear ribonucleoprotein 70 kDa	SNRNP70
26.1832332611084	26.0578689575195	26.4034805297852	26.3218841552734	26.2772369384766	26.2234916687012	25.2832584381104	26.472339630127	25.995641708374	26.2351226806641	26.052396774292	26.1699047088623	26.2485599517822	26.4177227020264	26.689266204834	25.8135070800781	25.9730110168457	26.2726898193359	26.4116725921631	26.1019668579102	26.1955184936523	25.8550224304199				5	5	5	48,9	48,9	48,9	15,524	0	174,32	8857200000	212	Q6QAP7;P08708	Q6QAP7;P08708	40S ribosomal protein S17	RPS17
28.0948448181152	28.1489677429199	28.2130699157715	28.1779136657715	28.2720203399658	28.2790946960449	28.1115379333496	28.0779075622559	28.5032424926758	28.0813446044922	28.4560527801514	27.7355823516846	29.1296615600586	28.4141845703125	29.9426193237305	29.0559864044189	28.5206031799316	28.1830654144287	29.2252674102783	27.8966445922852	29.3683204650879	28.4228858947754				12	12	11	44,4	44,4	44,4	35,936	0	323,31	44204000000	916	P08758	P08758	Annexin A5	ANXA5
32.1006355285645	32.9872398376465	31.0283737182617	31.5425682067871	30.9031219482422	30.6947078704834	30.5976581573486	31.642204284668	32.7236747741699	32.0202941894531	31.31276512146	30.8670082092285	33.2948799133301	31.4231815338135	32.8016929626465	31.6076164245605	30.6364612579346	30.2399578094482	31.3131942749023	30.0155220031738	31.9524364471436	30.8732376098633				46	46	34	70,2	70,2	55,2	69,691	0	323,31	394440000000	5609	P08835	P08835
27.8174285888672	27.7726287841797	27.9283332824707	27.8359794616699	27.9169139862061	28.1011371612549	27.8437957763672	27.8968887329102	27.9112510681152	27.7999134063721	27.9124565124512	27.6476516723633	27.9847755432129	27.6725444793701	27.9869804382324	27.7772312164307	27.8899211883545	27.9074459075928	28.0993633270264	27.9947872161865	27.9639015197754	27.8625564575195				10	10	10	42,7	42,7	42,7	32,928	0	287,64	27534000000	642	Q4GWZ2;P08865	Q4GWZ2;P08865	40S ribosomal protein SA	RPSA
30.602725982666	30.715124130249	30.704008102417	30.7711429595947	30.5884552001953	30.7783641815186	30.7629165649414	30.8245449066162	30.5620632171631	30.8163223266602	30.6399078369141	31.0832004547119	30.3976135253906	30.6213531494141	30.3479461669922	30.6047782897949	30.8045253753662	30.6986598968506	30.3434638977051	30.6600017547607	30.5941200256348	30.7443885803223				18	14	13	65,9	52,8	50,9	47,268	0	323,31	195210000000	3051	P09104;P09104-2	P09104;P09104-2	Gamma-enolase	ENO2
23.5820045471191	23.2341995239258	23.9086380004883	23.4431266784668	23.3451709747314	23.4582710266113	23.4628047943115	23.5928020477295	24.0854358673096	23.6065540313721	23.7910022735596	23.5981178283691	23.7681007385254	23.5061893463135	23.8966331481934	23.7529525756836	23.7774810791016	23.672176361084	23.7868556976318	23.3985462188721	23.8534336090088	23.6858386993408				5	5	5	23,6	23,6	23,6	44,292	0	36,563	1495800000	210	P09110;P09110-2	P09110;P09110-2	3-ketoacyl-CoA thiolase, peroxisomal	ACAA1
22.616096496582	22.3410816192627	23.128475189209	22.5227317810059	22.3958168029785	22.6866111755371	22.180362701416	22.5359859466553	22.5636348724365	22.325122833252	22.3054428100586	22.0535202026367	NaN	22.4617900848389	22.7000122070313	22.9269409179688	22.1962280273438	22.8119792938232	22.3682308197021	22.8118515014648	22.0075874328613	21.8047046661377				2	2	2	18,1	18,1	18,1	16,156	0	9,0999	399970000	63	P09132;P09132-2	P09132;P09132-2	Signal recognition particle 19 kDa protein	SRP19
25.1477241516113	25.4222145080566	25.2698440551758	25.3129844665527	25.2950973510742	25.5062770843506	25.1494121551514	25.4751167297363	25.3450698852539	25.0399990081787	24.591495513916	24.9406757354736	25.6487064361572	24.5997200012207	25.4022636413574	25.4567584991455	25.3694763183594	25.0751819610596	25.3205394744873	25.3918895721436	25.154613494873	25.5284519195557				2	2	2	18,9	18,9	18,9	17,394	0	107,11	4514300000	232	P09234	P09234	U1 small nuclear ribonucleoprotein C	SNRPC
25.9849662780762	26.0296592712402	26.3055839538574	26.1191940307617	25.9052619934082	25.9517593383789	25.9314308166504	26.1339149475098	25.9684448242188	26.207691192627	26.1530799865723	25.9996280670166	26.1590938568115	25.9814910888672	25.8471736907959	25.8705577850342	25.8806991577148	25.990514755249	25.7606105804443	25.8158206939697	26.1021308898926	26.1141338348389				11	11	2	39,1	39,1	8,8	24,893	0	144,48	7741400000	733	P09429;B2RPK0	P09429	High mobility group protein B1	HMGB1
23.7887001037598	24.3611927032471	23.8863639831543	23.8337936401367	24.5455646514893	23.673713684082	24.4859676361084	23.8521480560303	24.3287544250488	24.2869682312012	23.6931114196777	23.5354270935059	23.5434684753418	24.286434173584	24.4134693145752	24.547233581543	23.764705657959	24.4288444519043	24.6325531005859	23.918924331665	23.8789882659912	23.8786640167236				5	5	5	40,7	40,7	40,7	15,85	0	12,702	2051100000	125	P09455;P09455-2;P09455-3	P09455;P09455-2;P09455-3	Retinol-binding protein 1	RBP1
29.727165222168	29.8076457977295	29.7957172393799	29.9459037780762	29.9345245361328	29.8609848022461	29.8112735748291	29.706241607666	29.6157531738281	29.7908153533936	29.7744140625	29.7838325500488	29.17041015625	29.8848094940186	29.1960868835449	29.3475761413574	29.7372856140137	29.6393413543701	29.4787616729736	29.81591796875	29.5592346191406	29.8618125915527				12	11	10	41	37,9	34,5	40,05	0	323,31	96199000000	1005	P09471;P09471-2	P09471;P09471-2	Guanine nucleotide-binding protein G(o) subunit alpha	GNAO1
25.888011932373	26.0176563262939	25.9049396514893	23.2765426635742	24.0779228210449	25.8972663879395	25.5840530395508	25.5177192687988	25.5056743621826	25.7051086425781	25.3680763244629	25.498498916626	25.5803470611572	26.0604057312012	24.8899917602539	25.4491024017334	25.4088821411133	25.4861450195313	25.2711868286133	25.9749488830566	25.7375907897949	25.9315490722656				2	2	2	16,6	16,6	16,6	21,252	0	91,848	5455400000	190	P09488-2;Q03013-2;Q03013;P09488;Q03013-3;P28161-2;P46439;P28161	P09488-2;Q03013-2;Q03013;P09488;Q03013-3;P28161-2;P46439;P28161	Glutathione S-transferase Mu 1;Glutathione S-transferase Mu 4;Glutathione S-transferase Mu 2;Glutathione S-transferase Mu 5	GSTM1;GSTM4;GSTM2;GSTM5
22.939826965332	22.9311656951904	23.2257308959961	23.4774570465088	24.0034675598145	23.6737842559814	23.3700637817383	23.4494247436523	24.1172332763672	23.7922859191895	23.7970561981201	23.6651020050049	24.6833724975586	23.3834381103516	24.5220260620117	24.4336547851563	23.4295501708984	23.6237697601318	24.0667877197266	23.6725997924805	23.8314361572266	23.325777053833				6	4	2	18	14,1	10,2	32,865	0	76,37	1570400000	168	P09493-10;P42639;P09493-6;P09493-4;P09493;P09493-2;P09493-9;P09493-8;P09493-7;P09493-3	P09493-10;P42639;P09493-6;P09493-4;P09493;P09493-2;P09493-9;P09493-8;P09493-7;P09493-3	Tropomyosin alpha-1 chain	TPM1
23.5723323822021	23.5948390960693	24.0091152191162	24.2087306976318	23.904260635376	23.7564373016357	23.629810333252	23.9045333862305	23.5432281494141	23.8410682678223	23.1623935699463	24.1182270050049	23.1336784362793	23.4942588806152	22.5508823394775	23.024284362793	23.4464893341064	23.8833656311035	23.0335540771484	23.2738609313965	22.7744827270508	23.7648811340332				2	2	2	14	14	14	25,19	0	48,981	1042900000	70	P09497;P09497-2	P09497;P09497-2	Clathrin light chain B	CLTB
29.9350070953369	30.7231559753418	29.040843963623	29.5414047241211	29.0902519226074	29.0901393890381	28.6632862091064	29.5816421508789	30.4757919311523	30.0714149475098	29.3903312683105	29.3961143493652	31.0259094238281	29.4785556793213	30.5621242523193	30.1699352264404	29.1121864318848	29.4618091583252	30.4413089752197	29.5528736114502	29.8731079101563	29.2070827484131				38	38	32	66,2	66,2	57,5	76,967	0	323,31	107340000000	2647	P09571;P02788-2;P02788;P02787	P09571
28.1230297088623	27.9912204742432	28.1185131072998	28.1843719482422	27.9668617248535	28.1941318511963	28.1055908203125	28.1073150634766	28.2362899780273	28.1392860412598	28.0321769714355	28.2614116668701	27.9128837585449	28.1290664672852	27.4849128723145	27.7744770050049	28.1059093475342	28.1707286834717	27.9606456756592	28.1498413085938	27.6827354431152	27.9013671875				11	11	11	35,6	35,6	35,6	54,185	0	322,03	31073000000	1191	P09623;P09622-3;P09622;P09622-2	P09623;P09622-3;P09622	Dihydrolipoyl dehydrogenase, mitochondrial	DLD
24.5133285522461	24.1987113952637	24.2327480316162	24.3054389953613	24.2899856567383	24.2468757629395	24.4474639892578	24.5045566558838	24.2148857116699	24.181079864502	24.3499202728271	24.3016357421875	24.6844005584717	24.1450386047363	24.7397079467773	24.4560527801514	24.219654083252	24.2840042114258	24.3927917480469	24.118558883667	24.2564239501953	24.236988067627				5	5	5	28,6	28,6	28,6	28,415	0	311,22	2392900000	262	P09661	P09661	U2 small nuclear ribonucleoprotein A	SNRPA1
26.5515270233154	26.471284866333	26.3229522705078	26.4331703186035	26.4864177703857	26.4396095275879	26.5324573516846	26.5818691253662	26.4529285430908	26.460506439209	26.516544342041	26.6908931732178	26.6205940246582	26.5151748657227	26.4356861114502	26.5090885162354	26.2730007171631	26.34934425354	26.3568229675293	26.4460029602051	26.5294666290283	26.527193069458				19	19	19	22,7	22,7	22,7	113,08	0	239,51	10433000000	687	P09874	P09874	Poly [ADP-ribose] polymerase 1	PARP1
25.3773822784424	25.4420547485352	24.9505882263184	25.3392734527588	25.5176830291748	25.339298248291	25.3291549682617	25.274450302124	25.757360458374	25.07692527771	25.370174407959	25.181489944458	25.5519981384277	25.3839893341064	25.3478927612305	25.5960559844971	25.2827262878418	25.5191116333008	25.4510936737061	25.3102703094482	25.5012855529785	25.4904232025146				5	5	5	13,3	13,3	13,3	66,851	0	170,02	5022900000	324	P09960-4;P09960;P09960-3;P09960-2	P09960-4;P09960;P09960-3;P09960-2	Leukotriene A-4 hydrolase	LTA4H
31.4362621307373	31.4396800994873	31.221118927002	31.3122673034668	31.1990280151367	31.4192638397217	31.4466972351074	31.4251823425293	31.3106136322021	31.5973892211914	31.0978603363037	31.4167079925537	31.1685771942139	31.6441764831543	30.8125286102295	31.0778980255127	31.5488510131836	31.4310512542725	31.0286674499512	31.4248790740967	31.1598281860352	31.3645629882813				17	17	14	48,4	48,4	38,7	39,455	0	323,31	366110000000	2325	P09972;P05062	P09972	Fructose-bisphosphate aldolase C	ALDOC
24.0797805786133	24.3213062286377	24.4304294586182	24.0373401641846	24.2782192230225	24.1502799987793	24.4168586730957	24.4435882568359	24.5064258575439	24.1345710754395	24.4405269622803	24.2392120361328	24.2536945343018	24.0329933166504	23.5471229553223	24.0835132598877	24.0181617736816	24.0059432983398	23.9659309387207	23.3697452545166	24.8543701171875	24.0206604003906				6	4	4	53,9	46,9	46,9	13,509	0	31,994	2172100000	193	Q71UI9;P0C0S5;Q71UI9-4;Q71UI9-2;Q71UI9-3;Q71UI9-5	Q71UI9;P0C0S5;Q71UI9-4;Q71UI9-2;Q71UI9-3	Histone H2A.V;Histone H2A.Z	H2AFV;H2AFZ
22.610013961792	22.7654647827148	23.5548114776611	23.0433921813965	22.7241363525391	22.3496704101563	22.8572635650635	22.9457588195801	23.2236194610596	22.8930549621582	22.9237766265869	22.8324718475342	23.0851802825928	22.9306011199951	23.3704013824463	23.5773487091064	22.9426078796387	22.5322952270508	23.5039939880371	22.6251087188721	23.1674976348877	22.8281440734863				5	5	5	22,8	22,8	22,8	39,827	0	28,878	885930000	147	P0C5I2;Q9Y5P6;Q9Y5P6-2	P0C5I2
20.9796295166016	20.5499954223633	21.4331169128418	20.4368305206299	20.629545211792	21.030158996582	20.1203193664551	20.0611820220947	20.458854675293	20.5739002227783	20.6340484619141	20.2455425262451	NaN	20.3478164672852	19.8840503692627	21.0550403594971	19.8557758331299	20.5192718505859	21.8193283081055	20.9301242828369	20.5499019622803	19.5989799499512				3	3	3	65	65	65	10,775	0	38,868	95141000	56	P0C8B5	P0C8B5
25.560998916626	25.3080024719238	25.5322856903076	25.5067520141602	25.7461929321289	25.4268989562988	25.7985782623291	25.5712833404541	25.9108810424805	25.3149452209473	26.0885009765625	25.5619297027588	25.1577968597412	25.7003612518311	26.0502128601074	25.6962776184082	25.7726383209229	24.9904918670654	25.1608486175537	25.7849521636963	26.1446514129639	25.6674995422363				3	3	3	13,3	13,3	13,3	27,872	0	55,031	5437500000	96	P0DN76;Q01081-2;Q01081;Q29350;Q01081-3;Q8WU68-3;Q8WU68-2;Q8WU68;Q01081-4	P0DN76;Q01081-2;Q01081;Q29350;Q01081-3;Q8WU68-3;Q8WU68-2;Q8WU68	Splicing factor U2AF 35 kDa subunit;Splicing factor U2AF 26 kDa subunit	U2AF1;U2AF1L4
30.6984710693359	30.9019622802734	31.0878753662109	30.907543182373	30.8250389099121	30.8881664276123	30.8162956237793	30.8231010437012	30.8078784942627	30.7448921203613	30.666109085083	30.5913219451904	30.1606712341309	30.8274879455566	30.6878185272217	30.5089569091797	30.6690063476563	30.8303031921387	30.5195198059082	31.0177001953125	30.294527053833	30.6711006164551				9	9	9	80,5	80,5	80,5	16,837	0	323,31	202580000000	1223	P0DP25;P0DP24;P0DP23	P0DP25;P0DP24;P0DP23
23.4540405273438	23.1524658203125	23.0801029205322	23.6310863494873	23.1137714385986	23.2229919433594	23.8492469787598	23.408073425293	23.4723930358887	23.7360172271729	23.6854209899902	23.9750022888184	23.5343608856201	23.092212677002	23.9875679016113	22.9539051055908	23.3470859527588	23.1854057312012	23.1739940643311	23.2630386352539	23.4451675415039	23.0751953125				11	11	8	26,4	26,4	19	80,179	0	33,378	1234400000	158	P0DTA4	P0DTA4
26.1392459869385	25.6713218688965	26.2890815734863	25.8182315826416	25.4643821716309	26.0506477355957	25.9502944946289	26.2865009307861	26.1428527832031	25.5627880096436	26.1056385040283	25.2700481414795	26.2361621856689	25.8055210113525	25.8207206726074	25.2250385284424	26.044261932373	25.3651065826416	25.9948406219482	25.5892314910889	26.2360782623291	25.5718154907227				7	7	7	17,3	17,3	17,3	60,67	0	38,019	7255500000	328	P10155;P10155-3;P10155-5;P10155-4;P10155-2	P10155;P10155-3;P10155-5;P10155-4	60 kDa SS-A/Ro ribonucleoprotein	TROVE2
29.0476093292236	28.8498592376709	28.8982219696045	28.9292163848877	28.8987216949463	28.9399738311768	29.1419334411621	29.0259056091309	28.8876991271973	29.0932121276855	28.8642635345459	28.8816204071045	28.6596965789795	28.917236328125	28.82275390625	28.735294342041	29.2411289215088	29.0935401916504	28.8413867950439	29.0042629241943	28.9195423126221	28.9811725616455				15	15	15	57,6	57,6	57,6	50,101	0	323,31	58030000000	1561	P10173-2;P10173;P07954-2;P07954	P10173-2;P10173;P07954-2;P07954	Fumarate hydratase, mitochondrial	FH
24.8922500610352	25.1545867919922	25.0904769897461	24.8712558746338	25.0936717987061	24.9302577972412	25.1335201263428	25.0750427246094	24.7071647644043	25.0899143218994	25.1408634185791	25.078914642334	24.6180419921875	24.9740695953369	24.6285228729248	24.9043445587158	24.5633792877197	24.7744407653809	24.4741134643555	24.575309753418	24.9820404052734	25.0150299072266				7	7	2	28,3	28,3	9,1	21,865	0	20,685	3584600000	422	P10412;P16402	P10412;P16402	Histone H1.4;Histone H1.3	HIST1H1E;HIST1H1D
28.0807151794434	27.7933464050293	27.7829627990723	27.8773384094238	28.1095485687256	28.1269092559814	28.1132850646973	28.0556526184082	27.7709045410156	27.8565063476563	27.7310562133789	28.0919990539551	27.4758319854736	28.018741607666	27.5256958007813	27.6688117980957	27.8491554260254	28.0068874359131	27.6423740386963	27.9666233062744	27.5172214508057	27.6521472930908				7	7	7	13,6	13,6	13,6	68,996	0	62,67	27674000000	551	P10515	P10515	Dihydrolipoyllysine-residue acetyltransferase component of pyruvate dehydrogenase complex, mitochondrial	DLAT
29.469913482666	29.5638046264648	29.9551429748535	29.7144832611084	29.7181453704834	29.725902557373	29.6159534454346	29.6253337860107	29.5612163543701	29.510986328125	29.4855155944824	29.5827217102051	29.7200202941895	29.5761070251465	30.0478820800781	29.5955505371094	29.634937286377	29.5594367980957	29.947883605957	29.6477909088135	29.894718170166	29.4874706268311				11	11	10	67,5	67,5	60,8	18,518	0	217,22	96164000000	1154	P10668;P23528	P10668;P23528	Cofilin-1	CFL1
27.9264240264893	27.6741142272949	28.6593647003174	27.9989280700684	28.1322765350342	28.136682510376	28.3288116455078	28.3683662414551	28.1706371307373	28.0643501281738	28.1056156158447	28.2092628479004	27.4402694702148	28.1206016540527	26.6117134094238	28.0748176574707	27.8283748626709	28.3337745666504	27.5744323730469	27.8004627227783	27.8533172607422	28.1465377807617				7	7	7	6,4	6,4	6,4	135,36	0	48,835	31750000000	600	P10745	P10745	Retinol-binding protein 3	RBP3
28.1666793823242	28.1407737731934	28.0606899261475	28.2843265533447	28.3293285369873	28.1616134643555	28.1048049926758	28.1372566223145	28.3629207611084	28.1327514648438	27.9580230712891	27.8911418914795	28.2151184082031	28.2555046081543	28.3898315429688	28.230842590332	28.3764190673828	28.1676712036133	28.4458961486816	28.4202041625977	27.9650764465332	27.596471786499				17	17	17	64,7	64,7	64,7	49,023	0	323,31	33668000000	1196	P10775	P10775
30.0230293273926	29.9794063568115	30.1472492218018	30.0055656433105	30.0833988189697	30.0296478271484	30.1599102020264	30.2643375396729	30.0602340698242	30.0423316955566	30.1161766052246	30.203182220459	29.7143497467041	29.9339179992676	29.8394889831543	29.9854488372803	29.936279296875	30.232027053833	30.008321762085	30.0674648284912	30.0558738708496	30.030933380127				27	27	27	57,9	57,9	57,9	61,054	0	323,31	124040000000	3217	P10809;P10809-2	P10809	60 kDa heat shock protein, mitochondrial	HSPD1
29.9978103637695	29.984375	30.1005344390869	29.8930110931396	30.1689033508301	29.8874053955078	29.8040809631348	29.9344882965088	29.9883079528809	29.953067779541	30.0071964263916	30.0291137695313	29.9574165344238	29.9754772186279	30.108736038208	30.2049083709717	29.8327522277832	30.0289306640625	30.0941028594971	29.9555683135986	30.1997222900391	30.0923233032227				27	26	26	39,4	39,4	39,4	72,332	0	323,31	118870000000	2770	P11021;P34935	P11021	78 kDa glucose-regulated protein	HSPA5
24.3622055053711	24.195671081543	24.3616676330566	24.3626575469971	24.4636535644531	24.3364200592041	24.4837799072266	24.4324569702148	24.4033432006836	24.3285980224609	23.6755886077881	24.0544452667236	24.2527751922607	24.0418834686279	24.446907043457	23.9270896911621	24.3598098754883	23.9643402099609	24.4852561950684	24.546199798584	24.1734809875488	24.0516395568848				9	9	9	8,5	8,5	8,5	177,6	0	159,9	2256300000	308	P11047	P11047	Laminin subunit gamma-1	LAMC1
25.9869804382324	26.2313671112061	26.0218029022217	26.1985836029053	26.200122833252	26.2617797851563	26.0514717102051	26.1651878356934	26.0430068969727	26.240306854248	25.8905162811279	26.1026840209961	25.7889175415039	25.9177379608154	25.5169658660889	25.7856006622314	26.073844909668	26.0766563415527	25.7877426147461	26.1302967071533	26.038969039917	26.6256217956543				16	16	16	16,8	16,8	16,8	199,08	0	186,05	8000700000	761	P11137-3;P11137;P11137-2;P11137-4	P11137-3;P11137	Microtubule-associated protein 2	MAP2
31.8836517333984	31.9227485656738	31.8723373413086	31.9901218414307	31.9104099273682	31.9851684570313	32.0084342956543	32.015567779541	31.9008369445801	31.9933300018311	31.9654026031494	32.0155448913574	31.8515625	31.9879989624023	31.9639797210693	31.9469509124756	31.9701824188232	31.8891315460205	31.848611831665	31.9674701690674	32.0177612304688	31.9632129669189				34	34	23	65,2	65,2	45,2	70,897	0	323,31	456660000000	4285	P11142;P11142-2	P11142;P11142-2	Heat shock cognate 71 kDa protein	HSPA8
28.7997093200684	28.7091121673584	28.6551380157471	28.8291110992432	28.8969554901123	28.7803726196289	28.9749526977539	28.879940032959	28.7347240447998	28.8517265319824	28.8267574310303	28.8998146057129	28.5347633361816	28.7508144378662	28.3565616607666	28.7861213684082	28.8303298950195	29.0062561035156	28.6873550415039	28.8884468078613	28.8624877929688	28.9527435302734				7	7	7	16,1	16,1	16,1	54,035	0	82,543	53022000000	696	P20303;P11166	P20303;P11166	Solute carrier family 2, facilitated glucose transporter member 1	SLC2A1
23.2326240539551	23.084602355957	23.1946201324463	23.2140026092529	22.8821449279785	23.284008026123	23.044246673584	23.1852378845215	22.5924224853516	23.2153587341309	23.0166473388672	22.8702526092529	23.5732154846191	23.1453876495361	22.7428417205811	22.7342548370361	22.8180751800537	23.0123405456543	23.0750579833984	22.9527454376221	22.6990165710449	23.0566387176514				5	4	4	13,3	10,6	10,6	63,254	0	16,824	991130000	185	P11171-6;P11171-4;P11171-3;P11171-5;P11171-2;P11171;P11171-7	P11171-6;P11171-4;P11171-3;P11171-5;P11171-2;P11171;P11171-7	Protein 4.1	EPB41
22.9114265441895	22.8945903778076	22.3943538665771	23.3337001800537	22.485466003418	23.0199031829834	22.5631160736084	22.9535236358643	23.1465930938721	22.8768291473389	23.1610069274902	23.0437297821045	22.8349761962891	23.1342334747314	23.2832355499268	22.9627494812012	22.7851676940918	22.7924919128418	23.0978698730469	23.0859642028809	23.1230869293213	23.4210376739502				2	2	2	18,5	18,5	18,5	33,051	0	6,6087	826970000	107	P11172-2;P11172-3;P11172	P11172-2;P11172-3;P11172	Uridine 5-monophosphate synthase;Orotate phosphoribosyltransferase;Orotidine 5-phosphate decarboxylase	UMPS
27.2352981567383	27.1548385620117	27.2691669464111	27.2395515441895	27.1951141357422	27.2299022674561	27.4094734191895	27.3251953125	26.9330501556396	27.0814380645752	27.2672061920166	27.0320930480957	26.8367385864258	27.3132514953613	26.7241153717041	26.7828578948975	27.3980102539063	27.2447128295898	26.996395111084	27.2080383300781	26.8531475067139	27.0082817077637				7	7	7	28,7	28,7	28,7	39,233	0	162,69	16724000000	451	P11177;P11177-2;P11177-3	P11177;P11177-2;P11177-3	Pyruvate dehydrogenase E1 component subunit beta, mitochondrial	PDHB
27.2391395568848	27.1850986480713	27.2759761810303	27.3227024078369	27.2842044830322	27.3663806915283	27.2672061920166	27.1450996398926	27.1690502166748	27.1005268096924	27.1078033447266	27.3240489959717	27.3673667907715	27.4282035827637	26.9743976593018	27.0867958068848	27.0318412780762	27.1614875793457	26.9700126647949	27.0905914306641	27.1642665863037	27.4221820831299				16	16	11	26,8	26,8	18,9	96,695	0	301,68	17227000000	814	P11216	P11216	Glycogen phosphorylase, brain form	PYGB
24.2597179412842	24.646240234375	24.5949974060059	24.3605785369873	24.4755458831787	24.549072265625	24.5858039855957	24.233097076416	24.3417320251465	24.0123329162598	24.5043487548828	24.4096260070801	24.5201625823975	24.3911304473877	24.3955554962158	24.3189163208008	24.3460655212402	24.6028823852539	24.1759490966797	24.3911018371582	24.3180599212646	24.3698577880859				6	6	3	32,5	32,5	14,6	23,408	0	19,961	2483200000	244	P11234;P11234-3;P11234-2	P11234;P11234-3;P11234-2	Ras-related protein Ral-B	RALB
23.4595489501953	23.0382900238037	23.4410247802734	23.8078880310059	23.310396194458	23.2050247192383	23.4308490753174	23.195707321167	23.0399894714355	23.8787460327148	23.3484230041504	23.2549648284912	24.8710250854492	23.242504119873	23.2714042663574	23.6079864501953	23.3333778381348	23.6177272796631	22.9873447418213	23.4367256164551	22.9985637664795	23.2601299285889				16	13	13	10,1	8,5	8,5	267,82	0	99,047	1368600000	321	P11277-2;P11277;P11277-3	P11277-2;P11277;P11277-3	Spectrin beta chain, erythrocytic	SPTB
22.0517978668213	22.0237808227539	22.4587669372559	22.1951732635498	22.1268787384033	22.1929950714111	22.0886344909668	22.1377487182617	22.4787769317627	22.1315479278564	22.336067199707	22.073860168457	21.4715518951416	21.927921295166	22.3086109161377	21.903299331665	22.0182590484619	22.7003517150879	21.8292217254639	21.9063968658447	22.3877639770508	21.8556423187256				6	6	5	9,5	9,5	8,4	90,725	0	22,818	441200000	104	P11387	P11387	DNA topoisomerase 1	TOP1
25.7078227996826	25.2156505584717	25.7761993408203	25.3846740722656	25.0949172973633	25.7210540771484	25.4324493408203	25.4346618652344	25.4818115234375	24.9091854095459	25.5587711334229	25.4399127960205	25.7214660644531	25.2241802215576	25.9486103057861	25.4210357666016	25.616003036499	25.4645099639893	25.7449970245361	25.6257133483887	25.9950180053711	25.352840423584				8	8	8	17,7	17,7	17,7	59,256	0	91,119	5444800000	384	P11413;P11413-3;P11413-2	P11413;P11413-3;P11413-2	Glucose-6-phosphate 1-dehydrogenase	G6PD
30.6491966247559	30.4116439819336	30.8742408752441	30.6268081665039	30.7376365661621	30.6712989807129	30.6905612945557	30.5888214111328	30.484375	30.5792751312256	30.6786518096924	30.6526775360107	30.3303337097168	30.5011119842529	29.7765598297119	30.4658699035645	30.4724903106689	30.7414665222168	30.0626754760742	30.3932571411133	30.5526275634766	30.7379760742188				17	17	11	55,1	55,1	37,4	40,04	0	323,31	177270000000	3712	P11488	P11488	Guanine nucleotide-binding protein G(t) subunit alpha-1	GNAT1
26.229772567749	26.4740028381348	26.4085025787354	26.5316390991211	26.5658531188965	26.5390872955322	26.5002365112305	26.4799385070801	26.4918594360352	26.2184257507324	26.3366241455078	26.1537208557129	26.1602878570557	26.3366851806641	26.061975479126	26.2619285583496	26.4455280303955	26.2678375244141	26.2530517578125	26.4424095153809	26.3005981445313	26.4022579193115				13	13	13	18,3	18,3	18,3	129,63	0	220,94	9571500000	570	P11498;P11498-2	P11498	Pyruvate carboxylase, mitochondrial	PC
24.6122779846191	24.1403369903564	24.5938930511475	24.6080856323242	24.5607357025146	24.7260265350342	24.8560695648193	24.6490688323975	24.4912185668945	24.011381149292	24.5672283172607	24.5811614990234	25.4972057342529	24.0910758972168	25.6757354736328	24.5733089447021	25.0694808959961	24.1630821228027	24.9123077392578	24.6148090362549	25.1912174224854	24.7585220336914				6	6	6	8,8	8,8	8,8	101,56	0	16,171	3123100000	222	P11586	P11586	C-1-tetrahydrofolate synthase, cytoplasmic;Methylenetetrahydrofolate dehydrogenase;Methenyltetrahydrofolate cyclohydrolase;Formyltetrahydrofolate synthetase;C-1-tetrahydrofolate synthase, cytoplasmic, N-terminally processed	MTHFD1
27.4668865203857	27.5240516662598	27.5001354217529	27.4948616027832	27.4527816772461	27.5693626403809	27.4642601013184	27.4772396087646	27.5316867828369	27.3261890411377	27.5770626068115	27.3724479675293	27.1977882385254	27.5617427825928	27.0813331604004	27.7146186828613	27.3350143432617	27.5620803833008	27.4027538299561	27.6382064819336	27.4848022460938	27.4323978424072				24	24	19	35,6	35,6	26,7	109,72	0	323,31	20630000000	760	P11607-2;P11607;P16615-5;P16615-2;P16615-3;P16615;P16615-4	P11607-2;P11607;P16615-5;P16615-2;P16615-3;P16615;P16615-4	Sarcoplasmic/endoplasmic reticulum calcium ATPase 2	ATP2A2
30.3451232910156	30.4483814239502	30.4294166564941	30.3136978149414	30.3471069335938	30.2876377105713	30.4182834625244	30.6166496276855	30.1947975158691	30.493480682373	30.3795166015625	30.5853500366211	30.0645294189453	30.312801361084	30.0478096008301	30.0423164367676	30.356014251709	30.3738746643066	29.9949035644531	30.3852119445801	30.2052478790283	30.5158576965332				14	14	14	47,6	47,6	47,6	36,454	0	323,31	148580000000	1207	P11708;P40925;P40925-3;P40925-2	P11708
26.3401145935059	25.9752883911133	26.1178569793701	26.1853656768799	26.3245468139648	26.1563739776611	26.3691997528076	26.3859043121338	26.0838642120361	26.0689697265625	26.2220993041992	26.3870983123779	25.6255912780762	26.1197509765625	26.312126159668	26.1713008880615	26.2410087585449	26.3127765655518	26.3283081054688	26.1322860717773	25.9635391235352	26.1515693664551				2	2	2	10,4	10,4	10,4	39,724	0	14,578	8671400000	249	P11766	P11766	Alcohol dehydrogenase class-3	ADH5
27.1689682006836	26.6901931762695	26.5684719085693	26.9290523529053	26.9250717163086	27.0441513061523	26.8389835357666	26.8091239929199	27.1139793395996	26.8253555297852	27.1690711975098	27.1116600036621	26.9833755493164	27.0193328857422	27.0684909820557	27.0152149200439	27.2272434234619	26.9566345214844	27.2238445281982	27.0134582519531	26.9468517303467	26.9323749542236				9	9	4	45	45	19,5	34,769	0	198,11	14873000000	541	P11908;P11908-2	P11908;P11908-2	Ribose-phosphate pyrophosphokinase 2	PRPS2
26.8266201019287	26.8634357452393	26.7871398925781	26.8862495422363	27.0730094909668	26.7372798919678	26.7500610351563	27.0811786651611	27.0263538360596	26.8474559783936	26.8977966308594	26.8016319274902	27.115478515625	26.8341369628906	27.1131019592285	27.0216026306152	26.7010688781738	26.7060661315918	26.8537979125977	26.9005813598633	26.9629135131836	26.6736717224121				13	13	7	37,1	37,1	22,3	70,67	0	203,98	13544000000	540	P11940;P11940-2;Q9H361;Q4VXU2;Q4VXU2-2	P11940;P11940-2	Polyadenylate-binding protein 1	PABPC1
23.4234199523926	22.9963912963867	22.9027194976807	23.0246810913086	23.3724269866943	23.3175601959229	23.548770904541	23.753246307373	23.928991317749	23.385461807251	23.5087413787842	23.6138401031494	23.7554969787598	23.280445098877	24.4332656860352	23.8401260375977	23.5471954345703	23.6847229003906	23.906421661377	23.5512580871582	23.8633441925049	22.9842987060547				4	4	4	26,1	26,1	26,1	28,768	0	258,33	1303600000	163	P12004	P12004	Proliferating cell nuclear antigen	PCNA
30.0299339294434	29.5087051391602	29.2833518981934	28.7992820739746	29.6116695404053	29.5706634521484	29.1272869110107	29.4962120056152	29.8269462585449	29.8957786560059	29.6182270050049	29.8527717590332	29.5957489013672	29.2048511505127	29.6588592529297	29.3866577148438	29.3583526611328	29.0534915924072	29.1184196472168	29.3533706665039	29.48388671875	29.1605834960938				3	3	3	48,3	48,3	48,3	9,8962	0	51,968	85351000000	542	P12026	P12026
26.5185031890869	26.6664257049561	25.6109657287598	25.9044761657715	26.2474269866943	26.292594909668	25.9826698303223	26.1476631164551	26.0372123718262	26.1282081604004	25.5057411193848	26.1527996063232	25.7000026702881	25.9821128845215	25.563928604126	25.956657409668	26.3204402923584	26.6173210144043	25.2887344360352	25.7310562133789	25.5061779022217	25.8009281158447				6	4	4	8,3	6,3	6,3	112,48	0	43,701	7856100000	492	P12036;P12036-2;P12037	P12036;P12036-2	Neurofilament heavy polypeptide	NEFH
24.225191116333	24.2611503601074	24.3838157653809	24.5607814788818	24.5277042388916	24.734827041626	24.2170581817627	23.9537620544434	24.3684387207031	23.7725658416748	24.3183403015137	23.7639503479004	24.2777290344238	24.1063957214355	24.5364112854004	24.5221252441406	24.6626853942871	23.5304985046387	25.0010795593262	24.6806221008301	23.9816188812256	24.2087631225586				6	6	6	15,5	15,5	15,5	54,846	0	39,95	2432000000	271	P12081-4;P12081;P12081-3;P12081-2;P49590-2;P49590	P12081-4;P12081;P12081-3;P12081-2;P49590-2;P49590	Histidine--tRNA ligase, cytoplasmic;Probable histidine--tRNA ligase, mitochondrial	HARS;HARS2
25.890308380127	25.917839050293	25.7330684661865	25.9964332580566	25.7419605255127	25.8749332427979	25.8043537139893	25.8997383117676	25.9286041259766	25.9741821289063	25.7037925720215	25.8245506286621	25.5290050506592	25.521167755127	25.3217792510986	25.8737812042236	25.9141578674316	26.1487617492676	25.6723899841309	26.0985679626465	25.4867897033691	25.7547416687012				10	2	2	39,6	6	6	33,064	0	12,653	6459200000	108	P12235	P12235	ADP/ATP translocase 1	SLC25A4
24.8890380859375	24.7527084350586	25.0425567626953	24.6064033508301	25.0429782867432	24.7843055725098	24.7746677398682	25.0275783538818	24.8506984710693	24.8037567138672	25.1079025268555	25.115629196167	24.8456382751465	24.8991928100586	24.793140411377	25.164966583252	24.9520359039307	24.9856986999512	25.2118473052979	24.7834320068359	24.9910087585449	25.1240196228027				12	11	11	26,8	25,3	25,3	55,804	0	74,327	3506400000	415	P12268	P12268	Inosine-5-monophosphate dehydrogenase 2	IMPDH2
25.3931465148926	25.5708351135254	25.7987670898438	25.4798393249512	25.3382797241211	25.4443645477295	25.2260284423828	25.4843292236328	25.5101146697998	25.5204563140869	25.3766288757324	25.5682830810547	25.3268241882324	25.4302463531494	25.3881378173828	25.3309860229492	25.5214519500732	25.3905944824219	25.4819774627686	25.3041191101074	25.556037902832	25.4951229095459				21	21	21	12,6	12,6	12,6	267,29	0	323,31	5074400000	762	P12270;P12270-2	P12270	Nucleoprotein TPR	TPR
29.1500015258789	29.1865730285645	29.5285911560059	29.1665153503418	29.1438217163086	29.3754272460938	29.0307445526123	29.4306335449219	29.4698925018311	29.4791698455811	29.3343124389648	29.4823532104492	29.1956043243408	29.5109043121338	29.2580375671387	29.431791305542	29.4340209960938	29.5591354370117	29.2453804016113	29.2253894805908	29.3508148193359	29.5135955810547				5	5	5	17,7	17,7	17,7	36,474	0	323,31	84041000000	1189	P12271	P12271	Retinaldehyde-binding protein 1	RLBP1
22.5171661376953	22.7132701873779	22.9335289001465	23.5882930755615	22.7999744415283	22.9619045257568	22.4078044891357	22.5881538391113	23.3524360656738	23.3504104614258	23.1414623260498	22.4905223846436	23.48410987854	22.2950592041016	23.6123886108398	23.9384422302246	22.953067779541	22.6066131591797	23.3442306518555	23.0426902770996	22.6647968292236	22.4183120727539				3	3	3	23,6	23,6	23,6	11,828	0	8,1323	681330000	81	P12309	P12309
21.6625137329102	22.3685035705566	22.9256420135498	22.2392768859863	22.3446731567383	22.1658096313477	22.0109405517578	21.8947410583496	21.7221736907959	21.7378063201904	21.9809379577637	21.9940643310547	21.9098587036133	21.9550285339355	22.7862319946289	22.5895118713379	22.2181396484375	22.2667369842529	22.5648040771484	22.1785163879395	22.3657302856445	21.5090579986572				2	2	2	5	5	5	36,375	0	6,1927	325200000	54	P12429	P12429	Annexin A3	ANXA3
28.302209854126	28.4952812194824	28.8532600402832	28.6145687103271	28.7581558227539	28.5443382263184	28.3589057922363	28.9282283782959	28.5886840820313	28.8794822692871	28.6486988067627	28.8150177001953	27.9695892333984	28.6165256500244	28.1824817657471	28.5763473510742	28.4111366271973	28.8248310089111	28.3382339477539	28.8827571868896	28.4350395202637	28.4594402313232				15	2	2	45,3	3,1	3,1	47,036	0	4,3541	44196000000	173	P12532;P12532-2	P12532;P12532-2	Creatine kinase U-type, mitochondrial	CKMT1A
21.6758136749268	21.0080318450928	21.1236991882324	21.7286930084229	21.0315608978271	NaN	20.9719829559326	21.3193550109863	21.0919075012207	22.1110496520996	21.6779327392578	21.4707355499268	20.1273860931396	NaN	22.2843933105469	21.2694511413574	21.7302417755127	NaN	20.2924385070801	21.6821784973145	22.0633735656738	21.0768489837646				8	8	8	22,2	22,2	22,2	77,123	0	44,407	190630000	55	P12675	P12675
23.0012264251709	23.0950260162354	23.1410579681396	23.0794143676758	23.575231552124	23.1803855895996	22.704891204834	22.8326988220215	22.522066116333	23.0284786224365	23.1267280578613	23.0471172332764	22.9927024841309	22.8526668548584	22.8785419464111	22.3554496765137	22.7816314697266	23.0887870788574	22.8971214294434	23.1745128631592	22.0132522583008	22.6390247344971				3	3	3	12,1	12,1	12,1	50,47	0	120,48	859310000	163	P12694;P12694-2	P12694;P12694-2	2-oxoisovalerate dehydrogenase subunit alpha, mitochondrial	BCKDHA
23.1626281738281	23.1523971557617	22.0591411590576	23.4186515808105	22.920804977417	23.2584800720215	23.0498847961426	23.4204521179199	22.9414501190186	23.1981563568115	22.9536552429199	22.883659362793	22.7869892120361	22.9110717773438	23.251802444458	23.4039859771729	23.4773330688477	23.2222595214844	23.496545791626	22.9227237701416	22.9335689544678	21.7279949188232				7	7	5	20,1	20,1	16,6	59,834	0	20,316	1023400000	182	P12931;P12931-2	P12931;P12931-2	Proto-oncogene tyrosine-protein kinase Src	SRC
22.7154636383057	23.1100292205811	23.0331001281738	23.3386096954346	23.0120048522949	NaN	22.9483852386475	22.9094867706299	23.2955875396729	23.1748790740967	23.1576404571533	23.2496490478516	23.6516590118408	23.159294128418	23.6553554534912	23.5768966674805	23.084192276001	23.2214965820313	23.6704502105713	23.421480178833	22.9557418823242	22.6411590576172				2	2	2	10,3	10,3	10,3	47,261	0	35,819	696630000	63	P12955-3;P12955-2;P12955	P12955-3;P12955-2;P12955	Xaa-Pro dipeptidase	PEPD
21.8159866333008	22.3698234558105	22.0374946594238	22.1229076385498	21.7546653747559	22.6359405517578	22.3559265136719	21.0008697509766	21.6337509155273	21.3488006591797	20.9318561553955	21.7462978363037	23.6694011688232	21.6618824005127	21.7777938842773	19.8300323486328	23.1258125305176	21.0306606292725	20.8339900970459	21.907787322998	20.8179244995117	21.6360759735107				5	5	5	12	12	12	71,73	0	46,093	302940000	104	P13222;P28329-3;P28329-2;P28329	P13222
27.1168193817139	27.1009845733643	27.3393135070801	27.2658882141113	27.0979824066162	27.1413078308105	27.0451831817627	27.4059982299805	27.0721015930176	26.7506484985352	26.8601264953613	27.1235027313232	26.524486541748	27.0602035522461	26.5319023132324	26.481746673584	26.7211856842041	27.3001842498779	26.8257179260254	27.3061141967773	26.297492980957	26.9196872711182				8	8	8	17,5	17,5	17,5	80,311	0	117	15032000000	445	P13591-4;P13591-3;P13591-1;P13591;P13591-5;P13591-6	P13591-4;P13591-3;P13591-1;P13591;P13591-5	Neural cell adhesion molecule 1	NCAM1
25.1557331085205	24.9229927062988	24.822301864624	24.6930904388428	24.6554851531982	24.9628620147705	24.6769065856934	24.6383247375488	24.5061283111572	25.2239608764648	24.1818313598633	24.5922107696533	23.3830490112305	24.005802154541	23.9248275756836	24.1473083496094	24.5366325378418	24.3255176544189	24.3677673339844	24.8985557556152	23.9954376220703	24.0696220397949				4	4	4	61,8	61,8	61,8	8,9299	0	36,903	2756000000	152	P13618	P13618
31.6247367858887	31.7907123565674	31.7031288146973	31.7931938171387	31.727876663208	31.7152099609375	31.7103328704834	31.7630996704102	31.5812149047852	31.6609420776367	31.5597038269043	31.7287788391113	31.2552833557129	31.8157386779785	30.9564437866211	31.3685054779053	31.6960258483887	31.7465400695801	31.3905143737793	31.7468795776367	31.456184387207	31.8688373565674				36	36	19	47,6	47,6	28,1	111,75	0	323,31	380690000000	6913	P13637;P13637-2;P13637-3	P13637;P13637-2;P13637-3	Sodium/potassium-transporting ATPase subunit alpha-3	ATP1A3
28.8915252685547	28.8379077911377	28.8309993743896	28.9654006958008	29.0301418304443	28.7990093231201	28.8316040039063	28.8462142944336	28.9304008483887	28.8821811676025	29.0702419281006	28.8548278808594	29.3616123199463	28.9404487609863	29.4925003051758	29.1253814697266	28.7493858337402	28.9835891723633	29.2932014465332	28.9079170227051	29.222225189209	28.9024639129639				31	31	31	47,4	47,4	47,4	95,337	0	323,31	58673000000	1659	P13639	P13639	Elongation factor 2	EEF2
25.0660057067871	24.7274894714355	24.3776054382324	24.4034881591797	25.0976448059082	24.6624374389648	24.9025650024414	24.1130905151367	24.8852386474609	24.8774871826172	25.0419998168945	24.8634452819824	25.4504318237305	24.8966808319092	25.5146617889404	24.9643669128418	24.7794342041016	24.7727928161621	25.2175426483154	24.8694305419922	25.1441802978516	24.9162902832031				5	5	5	8,2	8,2	8,2	72,932	0	24,789	3625100000	228	P13667	P13667	Protein disulfide-isomerase A4	PDIA4
25.1542816162109	25.0384407043457	25.3746738433838	25.2180156707764	25.4384765625	25.3110637664795	25.1327972412109	24.8720512390137	25.4565162658691	24.984447479248	25.3241233825684	25.2977828979492	25.6538429260254	25.0904159545898	25.1256904602051	25.7778968811035	24.787914276123	25.3368453979492	25.0635395050049	25.1873168945313	25.4011459350586	25.2565631866455				6	6	6	21	21	21	61,049	0	135,74	4563700000	202	P13674;P13674-2;P13674-3	P13674;P13674-2;P13674-3	Prolyl 4-hydroxylase subunit alpha-1	P4HA1
26.2462158203125	26.2938289642334	25.9162483215332	25.9938163757324	26.138147354126	25.8919696807861	25.9799957275391	25.9720649719238	26.4742774963379	26.1138458251953	26.1719093322754	26.2945442199707	26.3443374633789	26.2087326049805	26.3977546691895	26.3775482177734	25.8867034912109	26.205545425415	26.4185905456543	25.9920902252197	26.3972873687744	26.1601104736328				4	4	4	27,3	27,3	27,3	19,595	0	113,02	8470100000	314	P61288;P13693;P13693-2;Q56UQ5	P61288;P13693;P13693-2;Q56UQ5	Translationally-controlled tumor protein;TPT1-like protein	TPT1
23.2935028076172	22.9547100067139	23.8037147521973	22.9014797210693	23.1526432037354	23.6280689239502	23.2388381958008	23.1328411102295	23.1333999633789	23.4985752105713	23.1891174316406	23.19309425354	23.9622917175293	23.3898506164551	22.9912872314453	22.8883285522461	23.2593841552734	22.9255847930908	23.0840740203857	22.805139541626	23.6243953704834	23.1423683166504				4	4	4	17	17	17	36,294	0	11,706	1057500000	113	P13716;P13716-2	P13716;P13716-2	Delta-aminolevulinic acid dehydratase	ALAD
23.6546192169189	22.9544906616211	22.3748779296875	21.5644855499268	24.0790691375732	22.3660774230957	22.5147819519043	20.0396766662598	22.65940284729	21.3656539916992	23.7975788116455	21.7960777282715	25.3681793212891	22.1189804077148	27.1944751739502	25.0667209625244	23.0603141784668	21.0260219573975	25.4739780426025	21.8949966430664	25.9864273071289	23.1506118774414				12	9	9	30,6	25,7	25,7	70,288	0	50,755	2214000000	205	P13796;P13796-2	P13796	Plastin-2	LCP1
25.4744338989258	25.1753787994385	25.6581611633301	25.4342308044434	25.7792053222656	25.4788780212402	25.367338180542	25.3575477600098	25.7658271789551	25.3410549163818	25.7691307067871	25.4085330963135	26.0378856658936	25.7582092285156	26.2533473968506	26.1284732818604	25.4618320465088	25.5173206329346	26.2205619812012	25.4385070800781	26.2312698364258	25.6337280273438				13	13	9	29,5	29,5	22,7	70,81	0	88,286	6008700000	621	P13797;P13797-3;P13797-2	P13797;P13797-3;P13797-2	Plastin-3	PLS3
27.7686023712158	27.593132019043	27.6675491333008	27.4396953582764	27.6344547271729	27.4588871002197	27.7334938049316	27.5494441986084	27.0059661865234	27.5578117370605	27.7788467407227	27.6596946716309	27.1649360656738	27.78297996521	27.4039173126221	27.5739860534668	27.8656883239746	27.8719596862793	27.7810211181641	27.8007164001465	27.5583763122559	27.9409885406494				7	7	7	30,6	30,6	30,6	35,079	0	86,457	23416000000	595	P13804;P13804-2	P13804;P13804-2	Electron transfer flavoprotein subunit alpha, mitochondrial	ETFA
20.8479423522949	20.8850955963135	22.4935054779053	20.5114574432373	20.8192081451416	20.5315551757813	20.8142356872559	20.6589488983154	20.3925399780273	20.9684448242188	21.2079696655273	21.3522930145264	20.7865295410156	20.7193717956543	21.2481727600098	20.6846714019775	20.8871078491211	21.4044246673584	21.1385536193848	21.5311374664307	21.347484588623	21.1323528289795				6	6	6	12,3	12,3	12,3	76,482	0	14,064	184360000	96	P13807-2;P13807	P13807-2;P13807	Glycogen [starch] synthase, muscle	GYS1
28.3280563354492	28.1090888977051	28.2484169006348	28.0435695648193	28.1249752044678	28.248363494873	28.3781147003174	28.3431434631348	28.2726898193359	28.1749897003174	28.3397598266602	28.458963394165	28.3528213500977	28.3456001281738	28.2388324737549	28.3807373046875	28.1492805480957	28.5179538726807	28.2318744659424	28.1903743743896	28.1660308837891	28.3701419830322				15	15	12	43,8	43,8	33,7	45,518	0	323,31	35879000000	1051	P13861;P13861-2;P05207	P13861;P13861-2	cAMP-dependent protein kinase type II-alpha regulatory subunit	PRKAR2A
28.8305435180664	28.7584590911865	28.2517261505127	28.5871238708496	28.5679912567139	28.2336273193359	28.2646942138672	28.2958946228027	29.3075351715088	29.1414680480957	29.0352230072021	28.6984786987305	29.4678192138672	28.8990211486816	29.585147857666	29.1531352996826	28.374340057373	28.1671466827393	30.0037212371826	28.8336353302002	29.9312896728516	29.0678634643555				14	13	13	28,3	26,7	26,7	49,507	0	176,48	59320000000	704	P14136-3;P14136;P14136-2	P14136-3;P14136;P14136-2	Glial fibrillary acidic protein	GFAP
24.1669235229492	23.0040187835693	23.4582252502441	22.1150856018066	24.5947284698486	20.0466537475586	22.8108940124512	22.5621528625488	25.2705860137939	23.1054496765137	25.0701541900635	22.8250846862793	26.2456340789795	23.7981719970703	26.2553234100342	25.7787322998047	21.8018836975098	21.1697387695313	26.1053791046143	21.7326564788818	26.1841812133789	22.7405567169189				7	7	7	40,3	40,3	40,3	33,668	0	69,857	2753500000	314	P14287	P14287
22.0294513702393	22.2096462249756	23.2593994140625	21.366907119751	21.9152011871338	22.2739944458008	22.1145362854004	21.9341125488281	22.2885856628418	21.5468864440918	21.8320388793945	22.0881690979004	21.7187080383301	22.2433757781982	22.6213531494141	21.6922054290771	22.2442264556885	22.4032020568848	22.3005828857422	22.1327323913574	22.3733901977539	22.3048686981201				4	4	4	9,3	9,3	9,3	59,177	0	11,047	292720000	59	P14314-2;P14314	P14314-2;P14314	Glucosidase 2 subunit beta	PRKCSH
25.4025859832764	25.3962574005127	25.765453338623	25.8154792785645	26.1363201141357	25.6882247924805	25.4459571838379	25.3189392089844	24.7473831176758	25.186372756958	24.9645805358887	23.3782043457031	25.3870048522949	25.3167209625244	24.0289897918701	24.9962043762207	25.1665077209473	25.7254180908203	25.2204513549805	25.2932090759277	25.7402534484863	25.8233795166016				3	2	2	20	10,8	10,8	27,805	0	11,105	4041000000	84	P14332	P14332
21.1581573486328	21.485408782959	22.0494289398193	21.1621131896973	21.0631484985352	21.3030891418457	21.5485877990723	21.1524047851563	21.2979927062988	21.5214385986328	21.9151344299316	21.2303314208984	21.8990688323975	21.5203380584717	21.5280265808105	20.9469871520996	22.108325958252	21.4604339599609	21.4610061645508	21.4404449462891	21.343334197998	20.916482925415				6	6	6	22,4	22,4	22,4	33,367	0	63,48	226660000	90	P14415	P14415	Sodium/potassium-transporting ATPase subunit beta-2	ATP1B2
25.373836517334	25.2019233703613	24.7277603149414	24.8984432220459	24.885290145874	24.8706092834473	25.3523826599121	25.1953563690186	24.8531646728516	25.2517929077148	25.0345726013184	25.635082244873	25.5576457977295	24.2989597320557	24.754337310791	25.5929164886475	25.1356258392334	25.2951431274414	25.3102836608887	25.1088600158691	25.1882286071777	25.9951000213623				26	3	3	50,5	5,3	5,3	57,936	0	21,745	6410600000	529	P14618;P14618-3;P30613-2;P30613	P14618;P14618-3	Pyruvate kinase PKM	PKM
32.4052124023438	32.4136924743652	32.5054740905762	32.3328323364258	32.3832817077637	32.4576950073242	32.5243606567383	32.6055068969727	32.4669570922852	32.5035171508789	32.5829315185547	32.6473388671875	32.52490234375	32.5478897094727	32.3027076721191	32.4783897399902	32.4194831848145	32.6617164611816	32.379020690918	32.6076889038086	32.3945693969727	32.5388412475586				28	28	5	55,2	55,2	10	58,061	0	323,31	695560000000	12280	P14618-2	P14618-2	Pyruvate kinase PKM	PKM
25.2098598480225	25.3117008209229	25.4236145019531	25.2480087280273	25.5388031005859	25.2414608001709	25.2169151306152	25.1855201721191	24.9408493041992	24.8223361968994	25.1089286804199	25.3062210083008	24.3892440795898	25.2973327636719	25.3785457611084	25.1180820465088	24.9573364257813	25.5481452941895	25.3313484191895	25.480712890625	25.257381439209	25.4238967895508				6	6	6	21,6	21,6	21,6	23,656	0	74,218	4405900000	459	P14678-2;P63162;P14678;P63162-2;P14678-3	P14678-2;P63162;P14678;P63162-2;P14678-3	Small nuclear ribonucleoprotein-associated proteins B and B;Small nuclear ribonucleoprotein-associated protein N	SNRPB;SNRPN
22.9406471252441	22.8286666870117	22.6260280609131	22.5184764862061	22.701000213623	22.9606857299805	22.7806949615479	22.847095489502	23.0009269714355	22.9330539703369	22.6949882507324	22.9155254364014	23.0908241271973	22.7871551513672	23.2502670288086	23.3823108673096	23.396167755127	22.6608963012695	22.8877983093262	23.1101531982422	23.0429134368896	22.8426742553711				6	6	6	7,3	7,3	7,3	117,97	0	18,036	865440000	163	P14735;P14735-2	P14735	Insulin-degrading enzyme	IDE
28.4277763366699	28.4201354980469	28.3985767364502	28.4332637786865	28.4990043640137	28.3995246887207	28.454517364502	28.507453918457	28.2121715545654	28.3181800842285	28.3817443847656	28.4740200042725	28.295825958252	28.4801902770996	28.4203777313232	28.3729076385498	28.3028259277344	28.3885536193848	28.4086074829102	28.4180450439453	28.5743598937988	28.2653312683105				14	14	14	45,4	45,4	45,4	50,56	0	323,31	40081000000	1287	P14866-2;P14866	P14866-2;P14866	Heterogeneous nuclear ribonucleoprotein L	HNRNPL
25.291109085083	25.2505493164063	25.5028114318848	25.2074813842773	25.3860778808594	25.3032875061035	25.4351673126221	25.261589050293	25.4043006896973	25.4233055114746	25.4760494232178	25.4096126556396	25.2937965393066	25.2618179321289	25.3207111358643	25.3809928894043	25.0873508453369	25.340518951416	25.384485244751	25.1835231781006	25.1145687103271	25.4169845581055				13	13	13	30,5	30,5	30,5	57,136	0	166,25	4686800000	569	P14868;P14868-2	P14868;P14868-2	Aspartate--tRNA ligase, cytoplasmic	DARS
26.3572883605957	26.2304306030273	25.8575706481934	26.0954608917236	26.2934894561768	25.8891620635986	25.8930950164795	25.8723392486572	26.7385063171387	26.519681930542	26.6300582885742	26.5889358520508	26.5245971679688	26.2316665649414	26.7074775695801	25.2031421661377	26.2044639587402	25.3608379364014	26.4136753082275	26.3896617889404	25.9020195007324	26.0910606384277				18	18	18	27,1	27,1	27,1	108,83	0	201,61	8839000000	500	P15145;P15144	P15145
22.8812637329102	23.0832214355469	23.2564353942871	23.344409942627	22.5991516113281	23.1288585662842	22.3228054046631	23.0632762908936	23.1467304229736	23.0233840942383	23.3551330566406	23.1052780151367	23.4256343841553	23.231424331665	23.0789527893066	23.2859668731689	23.3038730621338	23.7037258148193	23.3628463745117	23.3557376861572	22.6747303009033	22.6683731079102				7	7	7	20,6	20,6	20,6	55,755	0	19,351	902100000	100	P15170;P15170-2;P15170-3;Q8IYD1	P15170;P15170-2;P15170-3	Eukaryotic peptide chain release factor GTP-binding subunit ERF3A	GSPT1
22.3613796234131	21.9902610778809	23.4222679138184	22.4498977661133	21.2107582092285	21.9436016082764	21.1011695861816	21.7472896575928	22.2158050537109	22.8921203613281	21.7692584991455	21.9341850280762	22.5742225646973	22.8371887207031	23.183780670166	23.2100276947021	21.854907989502	22.696439743042	23.0981369018555	22.0808582305908	22.7992973327637	22.53440284729				8	2	2	14,3	5,1	5,1	69,412	0	7,7427	449150000	88	P15311	P15311	Ezrin	EZR
21.5121803283691	21.2733592987061	21.7704429626465	21.9049987792969	NaN	22.0014686584473	20.4278259277344	21.7672100067139	21.784143447876	21.703031539917	21.7452163696289	22.2525444030762	22.0262069702148	21.6437683105469	21.4569683074951	22.1389350891113	21.4141807556152	21.9929447174072	22.0022888183594	21.730504989624	22.481330871582	21.9712944030762				5	5	5	20,6	20,6	20,6	43,157	0	9,746	208600000	55	P15735-2;P15735	P15735-2;P15735	Phosphorylase b kinase gamma catalytic chain, liver/testis isoform	PHKG2
25.388053894043	25.0001964569092	25.5168685913086	25.2258224487305	25.1670799255371	24.9537200927734	25.2234745025635	25.3465423583984	25.4534492492676	25.0524368286133	25.3200759887695	25.2569274902344	25.1298389434814	25.2441082000732	25.3166198730469	25.5996742248535	25.3522663116455	25.1615600585938	25.289737701416	25.110481262207	25.4911556243896	25.0275115966797				7	7	7	27,3	27,3	27,3	31,324	0	55,67	4523800000	302	P15880	P15880	40S ribosomal protein S2	RPS2
21.8260955810547	21.5880641937256	21.9505863189697	22.631929397583	22.5592422485352	20.6705760955811	22.3691501617432	20.9784202575684	21.8759365081787	21.8498020172119	21.701509475708	21.7737426757813	22.4056053161621	20.8400993347168	21.059663772583	NaN	21.4086246490479	22.8199195861816	22.3676795959473	21.2994995117188	24.1294345855713	22.2761135101318				4	4	4	16,8	16,8	16,8	38,196	0	14,079	238400000	34	P15882-2;P15882-3;P15882	P15882-2;P15882-3;P15882	N-chimaerin	CHN1
25.901346206665	25.9853172302246	25.6403656005859	25.8733921051025	26.1128425598145	26.2593421936035	25.9164028167725	25.6187496185303	25.943962097168	25.8215637207031	25.9026851654053	25.7775459289551	26.0501708984375	26.1839561462402	25.6445350646973	26.024471282959	25.639066696167	26.0917816162109	25.927906036377	26.2255210876465	26.0009803771973	25.8893527984619				6	6	2	29,2	29,2	9	30,375	0	197,21	7064700000	301	P16152;P16152-2	P16152;P16152-2	Carbonyl reductase [NADPH] 1	CBR1
25.4484710693359	25.5618152618408	25.6309413909912	25.6216621398926	25.5371856689453	25.5353698730469	25.6433906555176	25.5323162078857	25.4751968383789	25.3888072967529	25.7493839263916	25.7453060150146	27.0343341827393	25.3228034973145	25.3290252685547	25.5274391174316	25.6706924438477	25.5309677124023	25.0077457427979	25.3127975463867	25.4010734558105	25.5702362060547				19	19	19	22,8	22,8	22,8	166,48	0	223,89	5635400000	588	P16157-2;P16157-8;P16157-12;P16157-21;P16157;P16157-3;P16157-16;P16157-5;P16157-15;P16157-11;P16157-10;P16157-13;P16157-4;P16157-7;P16157-6;P16157-9;P16157-14	P16157-2;P16157-8;P16157-12;P16157-21;P16157;P16157-3;P16157-16;P16157-5;P16157-15;P16157-11;P16157-10;P16157-13;P16157-4;P16157-7;P16157-6;P16157-9;P16157-14	Ankyrin-1	ANK1
22.4742221832275	22.9641647338867	22.146110534668	22.9745025634766	22.8570308685303	22.8434753417969	23.1176834106445	22.9349498748779	22.6195640563965	22.9073143005371	22.7103080749512	22.7976112365723	22.7577133178711	22.7153396606445	22.6341724395752	22.2817821502686	22.5494155883789	22.8749389648438	22.3024730682373	22.5730037689209	22.7164669036865	22.424129486084				2	2	2	12,6	12,6	12,6	36,688	0	15,288	657680000	122	P16220-1;P16220;P16220-3	P16220-1;P16220;P16220-3	Cyclic AMP-responsive element-binding protein 1	CREB1
30.3739528656006	30.4459400177002	30.412540435791	30.4293479919434	30.5231285095215	30.3175659179688	30.6596069335938	30.6662006378174	30.3362846374512	30.4389915466309	30.3702621459961	30.4766902923584	29.8178787231445	30.5104122161865	29.7710475921631	30.1586818695068	30.2506217956543	30.5096187591553	30.2643203735352	30.4976596832275	30.1812000274658	30.3254070281982				33	33	14	50,7	50,7	22,7	85,76	0	323,31	153340000000	2791	P16276	P16276
24.2947425842285	24.4710731506348	24.3403015136719	24.2291412353516	24.0491199493408	24.0648174285889	24.2201747894287	24.4158687591553	23.9818344116211	24.0590801239014	23.9369106292725	23.8881454467773	23.7203254699707	24.6721744537354	24.1015529632568	23.8857040405273	24.1129055023193	24.2759685516357	24.064624786377	24.3698196411133	23.9131107330322	24.3081359863281				8	8	4	24	24	13,2	59,024	0	36,891	2018400000	196	P16298;P16298-4;P16298-2;P16298-3	P16298;P16298-4;P16298-2;P16298-3	Serine/threonine-protein phosphatase 2B catalytic subunit beta isoform	PPP3CB
22.1518402099609	22.7635536193848	22.1185054779053	22.718994140625	22.5924701690674	22.0206069946289	22.4880523681641	22.7554378509521	21.93772315979	22.3689212799072	22.0230560302734	22.3119163513184	21.6068420410156	21.8714027404785	21.4909629821777	21.8880596160889	22.1951026916504	21.9678688049316	21.7181358337402	22.6731510162354	22.5297470092773	22.3985443115234				3	3	3	17,4	17,4	17,4	40,965	0	10,236	489030000	110	P16389-2;P16389	P16389-2;P16389	Potassium voltage-gated channel subfamily A member 2	KCNA2
21.2751865386963	21.7414722442627	21.2605743408203	21.1387195587158	21.3653678894043	21.2603778839111	21.2707290649414	21.2416324615479	21.3561096191406	21.5785064697266	21.8468627929688	20.9824447631836	21.1100883483887	22.1153812408447	21.3343086242676	21.616756439209	21.0913600921631	21.165943145752	20.984582901001	20.7402782440186	21.8579788208008	21.8384895324707				4	3	3	14,6	10,6	10,6	22,58	0	4,7843	230430000	89	P16401	P16401	Histone H1.5	HIST1H1B
26.5474414825439	26.3264999389648	26.2633399963379	26.5334243774414	26.6279354095459	26.4856433868408	26.6754665374756	26.6236610412598	26.1826934814453	26.2552337646484	26.6101608276367	26.5767250061035	26.8283710479736	26.7716064453125	26.058614730835	26.554162979126	26.7380409240723	26.6870727539063	26.6341247558594	26.4722118377686	26.7612075805664	26.7538204193115				11	7	7	14,5	9,7	9,7	99,546	0	226,22	11119000000	576	P16499	P16499	Rod cGMP-specific 3,5-cyclic phosphodiesterase subunit alpha	PDE6A
27.7840309143066	27.7908744812012	27.8009643554688	27.7655639648438	27.7311115264893	27.8896369934082	27.884298324585	28.1825160980225	28.0749797821045	27.8762092590332	27.8133869171143	27.9389572143555	27.7284832000732	28.0971565246582	27.1270503997803	27.6332511901855	27.889274597168	27.8830013275146	27.7076110839844	27.8818244934082	27.253734588623	27.6056137084961				9	7	7	42,1	37,1	37,1	37,221	0	239,11	26196000000	1129	P16520;P16520-2	P16520;P16520-2	Guanine nucleotide-binding protein G(I)/G(S)/G(T) subunit beta-3	GNB3
26.2935791015625	25.9983291625977	25.8228588104248	25.936897277832	25.5088844299316	26.1282558441162	25.8612213134766	25.5203723907471	25.5486431121826	26.068058013916	25.8895511627197	26.3941383361816	25.8947067260742	26.2824783325195	25.6072216033936	24.9840393066406	25.9688987731934	26.3671188354492	26.0355167388916	25.8945140838623	25.8585166931152	24.865364074707				4	4	4	24,2	24,2	24,2	17,302	0	19,759	7474400000	264	Q6DUB7;P16949;P16949-2;Q93045;Q93045-2	Q6DUB7;P16949;P16949-2	Stathmin	STMN1
22.1135292053223	22.2471599578857	22.266508102417	22.1914138793945	22.1402931213379	21.7540054321289	21.8766937255859	22.5427055358887	22.1686363220215	23.8393363952637	21.9175796508789	24.0346527099609	19.8799896240234	NaN	18.9836139678955	21.4672832489014	20.7500038146973	22.7667083740234	20.170352935791	22.2624206542969	21.3577041625977	21.639518737793				4	4	4	23,4	23,4	23,4	11,676	0	10,667	382860000	66	P17096;P17096-3	P17096;P17096-3	High mobility group protein HMG-I/HMG-Y	HMGA1
26.5618934631348	26.5892276763916	26.8294239044189	26.4451103210449	26.4861106872559	26.7476043701172	26.6476764678955	26.5052757263184	26.5170631408691	26.4819087982178	26.5273265838623	26.4400100708008	25.736120223999	26.1854019165039	25.9166679382324	26.225118637085	26.5392818450928	26.5082187652588	26.4118881225586	26.6185741424561	26.1439685821533	26.1285438537598				14	14	6	29,9	29,9	15,2	76,749	0	246,3	10161000000	634	P17252	P17252	Protein kinase C alpha type	PRKCA
27.6103267669678	27.7711563110352	27.5759658813477	27.8577461242676	27.7951583862305	27.7376480102539	27.7614459991455	27.7072582244873	27.4662590026855	27.5360717773438	27.4323883056641	27.6948394775391	26.7745609283447	27.7445297241211	26.7996387481689	27.1469917297363	27.691743850708	27.6837558746338	27.0114803314209	27.6943588256836	27.0570812225342	27.657642364502				13	13	12	29,1	29,1	26,8	74,111	0	323,31	21842000000	1214	P17600;P17600-2	P17600;P17600-2	Synapsin-1	SYN1
22.7875537872314	22.6035919189453	22.2836799621582	22.0762825012207	22.2522926330566	22.4500846862793	22.5076560974121	22.6987228393555	22.5272331237793	22.6471195220947	22.529390335083	22.3516998291016	22.6644897460938	22.6444892883301	22.7881965637207	22.3880634307861	22.1017150878906	22.478967666626	22.9333877563477	22.2558937072754	23.0258827209473	22.6558265686035				5	2	2	9,1	3,6	3,6	79,994	0	18,948	649280000	88	P17655;P17655-2	P17655;P17655-2	Calpain-2 catalytic subunit	CAPN2
19.8469867706299	19.88796043396	22.8853416442871	20.7486667633057	20.8775520324707	18.8045043945313	20.0228176116943	20.7592220306396	19.7936706542969	19.6542892456055	20.9257850646973	20.663179397583	20.1017398834229	20.6714096069336	20.2846393585205	20.5976982116699	19.3753242492676	20.6548748016357	19.5153770446777	20.465503692627	20.116340637207	19.9354267120361				5	4	4	18,1	12,4	12,4	24,133	0	5,044	170220000	81	P17741;P26583	P17741;P26583	High mobility group protein B2	HMGB2
25.2894706726074	25.0777740478516	25.1284561157227	25.2422676086426	25.3141193389893	25.1466770172119	25.3218040466309	25.5108757019043	25.5833625793457	25.1964092254639	25.2586669921875	25.3049182891846	25.2796058654785	24.9518184661865	25.6230487823486	25.6001110076904	25.1133556365967	25.0873908996582	25.1883850097656	24.9089031219482	25.6566772460938	25.2291011810303				14	9	9	27,2	17,8	17,8	69,147	0	41,532	4527200000	398	P17844;P17844-2	P17844;P17844-2	Probable ATP-dependent RNA helicase DDX5	DDX5
28.2083988189697	28.1343879699707	27.9588508605957	27.9439029693604	27.9161529541016	27.8595142364502	28.0759391784668	28.0746326446533	28.179536819458	28.0194778442383	27.9268646240234	28.1333961486816	28.2280197143555	28.0732517242432	28.2889957427979	28.2015247344971	28.1613025665283	28.1574211120605	28.1275234222412	27.9234848022461	27.9018802642822	28.0404968261719				10	9	8	17,8	16,7	14,2	85,018	0	323,31	31312000000	888	P17858;P17858-2	P17858;P17858-2	ATP-dependent 6-phosphofructokinase, liver type	PFKL
21.2780151367188	20.803840637207	22.3390960693359	21.7615242004395	22.345027923584	22.3149738311768	21.0365333557129	21.758581161499	21.915340423584	21.7684097290039	22.1264801025391	21.6639862060547	23.0549907684326	21.6037673950195	23.3988723754883	22.5252265930176	21.5294532775879	21.0305938720703	22.7977237701416	21.4687366485596	22.7578582763672	21.2069053649902				3	3	3	16	16	16	26,152	0	6,1064	366900000	105	P17931	P17931	Galectin-3	LGALS3
27.010046005249	26.9663066864014	27.0227394104004	26.7370796203613	26.9965858459473	27.0368976593018	26.9653224945068	27.096715927124	27.0352001190186	26.8277893066406	26.9522151947021	26.9537372589111	26.9870872497559	27.0086975097656	26.9719638824463	27.0781593322754	26.8389568328857	26.9262256622314	26.7893524169922	26.900203704834	27.1022682189941	27.0944061279297				12	12	12	42,8	42,8	42,8	49,203	0	323,31	14553000000	699	P17980	P17980	26S protease regulatory subunit 6A	PSMC3
28.3618545532227	28.3857040405273	28.3229942321777	28.5160160064697	28.3200550079346	28.4006271362305	28.5163764953613	28.4193992614746	28.4044227600098	28.3243885040283	28.3458690643311	28.4818534851074	28.4483623504639	28.4099216461182	28.4388427734375	28.2879981994629	28.4558868408203	28.4027938842773	28.2668647766113	28.4893608093262	28.3571853637695	28.3282299041748				19	19	19	48,9	48,9	48,9	60,343	0	323,31	39140000000	1524	P17987	P17987	T-complex protein 1 subunit alpha	TCP1
23.1310710906982	22.364574432373	22.9701976776123	22.6699829101563	22.618221282959	22.6755294799805	23.013599395752	23.0750961303711	23.0863628387451	23.9730377197266	22.2769908905029	22.5183506011963	21.959493637085	23.1093273162842	22.5363121032715	22.7188720703125	23.4278831481934	22.3876266479492	22.4370040893555	23.117826461792	22.4038925170898	22.5347003936768				5	5	5	12,6	12,6	12,6	88,053	0	12,38	671930000	107	P18084	P18084	Integrin beta-5	ITGB5
24.7060070037842	24.7119255065918	25.1406555175781	24.694221496582	25.0835113525391	24.7618522644043	24.7878913879395	24.939453125	25.2039985656738	24.473762512207	25.0658226013184	24.9679012298584	25.1134357452393	24.8191356658936	25.21950340271	25.3480625152588	24.8443546295166	25.009449005127	25.460298538208	25.0244579315186	24.9843482971191	24.8304061889648				4	2	2	30	12,2	12,2	20,511	0	127,03	3677200000	91	P18085	P18085	ADP-ribosylation factor 4	ARF4
25.4717063903809	25.5584583282471	25.6864471435547	25.4155788421631	25.5486125946045	25.0615463256836	25.3572158813477	25.5138282775879	25.4308605194092	25.5466823577881	25.4864063262939	25.7043914794922	25.3959274291992	25.3595790863037	25.4996013641357	25.6752414703369	25.9460277557373	25.2862415313721	25.7196617126465	25.3739185333252	25.6924381256104	25.2542324066162				5	5	5	25,8	25,8	25,8	29,225	0	52,003	5300300000	294	P18124	P18124	60S ribosomal protein L7	RPL7
27.4071769714355	27.2220859527588	27.2640609741211	27.3134460449219	27.2675228118896	27.246036529541	27.2256908416748	27.1968822479248	27.2983169555664	27.1880531311035	27.3227806091309	27.0228843688965	27.8368072509766	27.2935981750488	27.8927402496338	27.6176071166992	27.4320182800293	27.0732555389404	27.6309642791748	27.4116630554199	27.5690155029297	27.2332496643066				18	18	18	30,2	30,2	30,2	116,88	0	323,31	19271000000	1019	P26234-2;P26234;P18206-2;P18206;P18206-3	P26234-2;P26234;P18206-2;P18206	Vinculin	VCL
21.9841442108154	22.0955581665039	22.6080551147461	22.2657527923584	22.0849838256836	22.2934741973877	21.644702911377	22.1275978088379	22.0655193328857	22.0155982971191	21.7948341369629	22.1327457427979	21.5457572937012	22.6783580780029	22.0878448486328	22.1189517974854	22.1216220855713	22.3269519805908	21.8974285125732	22.1157493591309	22.6124515533447	22.2964344024658				8	8	8	14,4	14,4	14,4	89,702	0	19,469	439160000	114	P18433-6;P18433	P18433-6;P18433	Receptor-type tyrosine-protein phosphatase alpha	PTPRA
21.4663543701172	22.3354988098145	22.1211643218994	21.7286510467529	21.5353145599365	22.3911819458008	22.1959686279297	22.3448867797852	21.8143081665039	22.1563777923584	22.2708511352539	21.7607040405273	22.0979633331299	21.7851715087891	22.4943866729736	22.5261058807373	22.0377197265625	21.7676582336426	22.3591079711914	22.3848056793213	22.6468524932861	22.0057525634766				5	5	5	3,4	3,4	3,4	232,3	0	119,74	513890000	140	P18583-2;P18583-10;P18583-4;P18583-7;P18583;P18583-5;P18583-9;P18583-3;P18583-6;P18583-8	P18583-2;P18583-10;P18583-4;P18583-7;P18583;P18583-5;P18583-9;P18583-3;P18583-6	Protein SON	SON
25.0563220977783	25.134485244751	25.2761631011963	24.9015827178955	24.9849185943604	25.1112594604492	25.0382614135742	25.0463275909424	25.1047859191895	24.1641159057617	24.7352523803711	24.8262920379639	25.3241500854492	24.8597106933594	25.5102138519287	25.378547668457	24.5761413574219	24.8792362213135	24.9300880432129	24.9067668914795	24.8984527587891	24.5505619049072				6	6	6	30,3	30,3	30,3	26,372	0	34,364	3912700000	355	P18621-3;P18621;P18621-2	P18621-3;P18621;P18621-2	60S ribosomal protein L17	RPL17
28.6420764923096	29.4615802764893	27.7615261077881	28.3310317993164	27.9636077880859	27.5778160095215	27.9396228790283	28.5567893981934	29.2947521209717	28.6548118591309	28.0681858062744	27.6204795837402	29.4754047393799	28.4961242675781	29.964282989502	28.6542453765869	27.4003562927246	27.1140651702881	29.1103763580322	27.8263206481934	29.6698379516602	28.2677040100098				16	16	11	54	54	42,6	30,325	0	323,31	45623000000	843	P18648;P02647	P18648
24.4351615905762	24.2654266357422	23.97922706604	23.8598976135254	24.1354904174805	23.8052864074707	24.2154083251953	23.9201831817627	24.3835201263428	23.5766372680664	24.6837711334229	24.1047420501709	25.3228759765625	23.6862106323242	26.2823047637939	24.9627857208252	23.9460525512695	23.0654315948486	25.3288269042969	22.7595977783203	25.7041206359863	24.0135135650635				7	7	7	28,4	28,4	28,4	36,599	0	217,75	2693900000	270	P18650	P18650
31.8461647033691	31.8843955993652	31.9095935821533	31.9543037414551	32.0150527954102	31.9453315734863	31.9190139770508	32.1330490112305	32.0567092895508	32.2640037536621	32.1310844421387	32.2013816833496	32.090160369873	32.0587882995605	31.721809387207	32.1317291259766	31.9585552215576	31.9743804931641	31.9598007202148	32.0149116516113	31.9990139007568	32.0140800476074				19	19	15	78,3	78,3	62,2	28,804	0	323,31	481400000000	4343	P18669;Q8N0Y7	P18669	Phosphoglycerate mutase 1	PGAM1
24.7537536621094	23.8982086181641	23.84885597229	24.0106182098389	23.5312404632568	25.2518501281738	25.4127254486084	24.3072242736816	24.2808246612549	23.9264450073242	23.2574424743652	23.8175048828125	24.4103488922119	23.912561416626	23.8858070373535	24.0313758850098	23.8680286407471	24.7120151519775	24.1651153564453	23.9819793701172	24.1210441589355	23.8505725860596				5	5	5	20,4	20,4	20,4	44,969	0	50,934	3694300000	148	P18754;P18754-2	P18754;P18754-2	Regulator of chromosome condensation	RCC1
26.2386951446533	26.0804710388184	26.3368911743164	26.3382740020752	26.4700050354004	26.2866630554199	26.1551570892334	26.3322639465332	26.2807807922363	26.3037128448486	26.5089569091797	26.1729202270508	26.5056190490723	26.0775833129883	26.9398937225342	26.5776653289795	26.4926624298096	26.2558498382568	26.7836360931396	26.3790607452393	26.9249839782715	26.3095455169678				10	10	10	22,3	22,3	22,3	97,039	0	129,17	10066000000	494	P19022-2;P19022;P55283-2;P55283	P19022-2;P19022	Cadherin-2	CDH2
26.0650730133057	25.8422088623047	25.7275657653809	26.017463684082	25.9044227600098	25.9441528320313	26.0670928955078	25.8423271179199	25.852596282959	25.8697624206543	25.4473762512207	25.9279384613037	25.5927886962891	25.7968864440918	25.4079551696777	25.9080696105957	25.9728584289551	25.814603805542	25.6644344329834	25.8942947387695	25.6121196746826	25.8286895751953				5	5	5	21,7	21,7	21,7	40,923	0	134,61	6798300000	454	P19086	P19086	Guanine nucleotide-binding protein G(z) subunit alpha	GNAZ
26.4332695007324	26.0843334197998	26.3430519104004	26.0657634735107	26.0907669067383	26.2332954406738	26.3238124847412	25.8507118225098	26.5630569458008	26.0326137542725	25.9933090209961	25.8324317932129	26.1298656463623	25.5760021209717	26.8478755950928	25.8591232299805	26.3697090148926	26.8484039306641	27.224573135376	25.9636249542236	25.0315704345703	25.9141082763672				2	2	2	12,7	12,7	12,7	21,044	0	11,381	7148300000	74	P19130	P19130
24.7914657592773	24.7375640869141	24.7402324676514	25.0428733825684	25.0734996795654	24.6058826446533	25.2071151733398	24.680362701416	24.3380508422852	24.5494079589844	25.8339538574219	24.7260723114014	27.1494026184082	24.7096519470215	28.4742164611816	26.3153667449951	24.9281749725342	24.6548042297363	25.611457824707	24.5895957946777	26.5258331298828	24.6211376190186				3	3	3	64,1	64,1	64,1	8,7839	0	49,836	5751000000	159	P19133	P19133
20.6855602264404	20.5698928833008	20.5169162750244	20.7419567108154	20.5063629150391	20.4283542633057	20.971061706543	20.9133148193359	20.5510177612305	21.1969528198242	20.6460361480713	20.5051879882813	20.3987445831299	20.8253574371338	21.1844806671143	20.6961688995361	21.2205238342285	21.289852142334	20.9680404663086	21.4483394622803	20.9737453460693	20.7104339599609				4	4	4	4,8	4,8	4,8	148,53	0	8,0683	120450000	53	P19174;P19174-2	P19174;P19174-2	1-phosphatidylinositol 4,5-bisphosphate phosphodiesterase gamma-1	PLCG1
25.4440250396729	25.15895652771	25.4696769714355	25.2327213287354	25.6198577880859	25.6954021453857	25.5252418518066	25.3619327545166	25.4917869567871	25.3098983764648	25.8198051452637	25.7671585083008	25.7931461334229	25.4964256286621	25.9354152679443	25.5945434570313	25.4817085266113	25.4431896209717	25.70631980896	25.8244075775146	25.3848171234131	25.1738300323486				12	12	12	31,3	31,3	31,3	81,243	0	142,24	5527200000	542	P19205;P13798	P19205
27.6120643615723	28.0286445617676	27.5789756774902	27.6207942962646	27.8001441955566	27.9217987060547	27.8448143005371	27.7963485717773	27.6746997833252	27.5317440032959	27.833517074585	27.8110408782959	28.1276340484619	27.7360363006592	27.9590244293213	27.8094520568848	27.6626205444336	27.8071956634521	27.4109077453613	27.3561305999756	27.970251083374	27.764627456665				13	13	13	18	18	18	76,613	0	126,54	25481000000	542	P19338	P19338	Nucleolin	NCL
29.9772453308105	30.0836887359619	30.2623615264893	30.0452842712402	30.1450500488281	30.1562919616699	30.1881904602051	30.0752754211426	30.0032863616943	30.0339126586914	30.1020584106445	30.0486335754395	29.7161483764648	30.140022277832	29.5244617462158	29.882022857666	29.8032112121582	30.147985458374	29.8444919586182	30.0965042114258	29.6964378356934	29.9952983856201				25	25	18	31,3	31,3	24,5	102,48	0	323,31	120030000000	2296	P19367;P19367-4;P19367-2;P19367-3	P19367;P19367-4;P19367-2;P19367-3	Hexokinase-1	HK1
22.6245422363281	22.5303859710693	22.9630699157715	22.6542434692383	22.6235275268555	22.7584953308105	22.820333480835	22.9729080200195	22.5262279510498	22.8871021270752	22.8052864074707	22.5229873657227	22.6256637573242	22.4697341918945	22.7855892181396	22.9632835388184	22.7221374511719	22.6356201171875	22.8284301757813	22.6573104858398	22.7562141418457	22.8431930541992				4	4	4	27,6	27,6	27,6	31,441	0	150,64	792600000	168	P19387	P19387	DNA-directed RNA polymerase II subunit RPB3	POLR2C
27.9016952514648	27.9782295227051	28.0258922576904	28.1988506317139	28.1724872589111	28.1423835754395	28.1770401000977	28.0223121643066	28.1946811676025	28.1644668579102	27.8630809783936	28.109073638916	27.7113571166992	27.9548683166504	27.5121841430664	27.8870582580566	28.0824775695801	27.9658203125	27.842752456665	28.1592102050781	27.8800354003906	27.8418941497803				10	10	10	48,2	48,2	48,2	27,391	0	323,31	29963000000	715	P19404	P19404	NADH dehydrogenase [ubiquinone] flavoprotein 2, mitochondrial	NDUFV2
26.6522674560547	26.0608177185059	26.5448303222656	26.2402839660645	27.0081920623779	25.9689788818359	26.3717727661133	25.9268608093262	26.5902061462402	26.3631439208984	26.7131233215332	25.930793762207	27.1954936981201	25.9687194824219	28.0826797485352	27.2500782012939	26.4123268127441	26.1638832092285	27.4447956085205	26.2350845336914	27.3834400177002	26.345552444458				10	10	10	34,4	34,4	34,4	38,759	0	323,31	12390000000	723	P19619;P04083	P19619
26.7860507965088	26.7200736999512	26.690092086792	26.5710906982422	27.0146541595459	26.7085399627686	26.8010482788086	26.6104125976563	27.231969833374	26.6191577911377	27.3667755126953	26.3490352630615	27.9872264862061	26.8924007415771	28.8830718994141	27.8691520690918	27.0028648376465	27.0289192199707	28.2176322937012	26.9178733825684	27.9859771728516	27.1682300567627				15	15	15	51,9	51,9	51,9	38,422	0	323,31	18516000000	912	P19620;P07355;P07355-2;A6NMY6	P19620;P07355;P07355-2	Annexin A2	ANXA2
22.495210647583	22.4102210998535	23.1223449707031	22.6745586395264	23.0400066375732	22.1718978881836	21.9633331298828	22.9212532043457	22.8457622528076	22.9162731170654	22.4226226806641	22.0701942443848	22.5783157348633	22.7507247924805	22.6583213806152	22.060375213623	22.0372943878174	22.3630409240723	22.3224754333496	22.6488914489746	22.3003349304199	22.6444454193115				8	8	8	33,4	33,4	33,4	41,213	0	105,09	668650000	179	P19784	P19784	Casein kinase II subunit alpha	CSNK2A2
23.1927909851074	23.2139663696289	22.781759262085	23.3161811828613	23.4287967681885	23.4415168762207	22.9545631408691	23.1554355621338	22.9489593505859	23.5658740997314	23.1388473510742	23.2253894805908	23.4170475006104	23.5399188995361	22.928337097168	22.9131374359131	23.4110908508301	23.7329349517822	22.5619010925293	23.0618801116943	23.2543563842773	23.20188331604				23	2	2	24,3	3	3	137,8	0	36,828	768750000	75	P20020-4;P20020-1;P20020-6;P20020;P20020-5;P20020-2	P20020-4;P20020-1;P20020-6;P20020;P20020-5;P20020-2	Plasma membrane calcium-transporting ATPase 1	ATP2B1
23.146312713623	23.206563949585	23.5014801025391	23.5361423492432	23.5046997070313	23.3902359008789	23.571907043457	23.2319107055664	23.1714763641357	23.092113494873	23.5434150695801	23.4681529998779	23.6320571899414	23.5661087036133	23.8777160644531	23.7517948150635	23.5159969329834	23.3467235565186	23.7190933227539	23.4401092529297	23.7912139892578	23.5329246520996				5	5	5	20,1	20,1	20,1	38,388	0	122,97	1234700000	139	P20042	P20042	Eukaryotic translation initiation factor 2 subunit 2	EIF2S2
22.994758605957	22.7488689422607	23.160551071167	22.6757507324219	22.8025074005127	22.8172512054443	22.7688941955566	23.0039176940918	23.3100852966309	22.2205448150635	22.8951320648193	22.9886722564697	23.2675838470459	23.0966167449951	23.4164657592773	23.3583106994629	23.1731624603271	22.5949401855469	23.6343650817871	23.4508056640625	23.2579154968262	22.7875328063965				3	3	3	8,6	8,6	8,6	50,315	0	116,22	842150000	123	P20073-2;P20073	P20073-2;P20073	Annexin A7	ANXA7
22.814733505249	23.4678287506104	23.3745021820068	22.8563976287842	23.2095966339111	NaN	22.7892684936523	23.261266708374	23.6829071044922	22.9165363311768	23.6258335113525	23.1835460662842	23.5453395843506	23.0672092437744	24.107292175293	23.7367706298828	23.1881923675537	23.4262809753418	24.282621383667	23.1903762817383	23.3766250610352	22.6657695770264				3	3	3	19,3	19,3	19,3	34,239	0	23,817	837950000	78	P20112;P09486	P20112;P09486	SPARC	SPARC
23.8669090270996	23.5265045166016	23.6357822418213	23.3827590942383	23.5389003753662	23.8166255950928	24.0984077453613	23.8251094818115	23.6664695739746	23.5998229980469	23.7503967285156	23.3735618591309	23.7179050445557	22.7205276489258	24.0142097473145	23.9760322570801	23.7620162963867	23.6249980926514	23.8566112518311	23.5608253479004	24.0469074249268	23.3956432342529				5	5	5	60,5	60,5	60,5	17,699	0	92,707	1590600000	294	P20290-2;P20290	P20290-2;P20290	Transcription factor BTF3	BTF3
28.4178581237793	28.4807224273682	28.0053462982178	28.2316627502441	28.587308883667	28.0254001617432	28.4066524505615	28.1426010131836	28.4932174682617	28.3200492858887	28.7213115692139	28.5575828552246	29.3598136901855	28.4717769622803	29.1712799072266	28.5838890075684	28.3497924804688	28.258264541626	28.8152751922607	28.3107051849365	28.8386192321777	28.2736663818359				15	15	9	34,8	34,8	21,6	84,774	0	323,31	42453000000	1209	P20305;P20305-2;CON__Q3SX14	P20305;P20305-2
28.1941604614258	28.3670425415039	28.431921005249	28.2733020782471	28.3810577392578	28.2598342895508	28.22483253479	28.3318672180176	28.0600719451904	27.9948558807373	28.1509323120117	28.2964553833008	27.56130027771	28.2379989624023	27.5259056091309	27.81418800354	28.1058025360107	28.3421802520752	27.8022060394287	28.1733303070068	27.9333915710449	28.3406715393066				7	7	4	42,7	42,7	26,8	24,97	0	323,31	36542000000	770	Q06AU3;P20336	Q06AU3;P20336	Ras-related protein Rab-3A	RAB3A
24.7045783996582	24.4044303894043	24.7157573699951	24.472469329834	24.3929901123047	24.5835838317871	24.7195243835449	24.8268890380859	24.5691680908203	24.4800300598145	24.4721832275391	24.7866516113281	24.2563877105713	24.8847827911377	24.3767032623291	24.454231262207	24.6603412628174	24.887523651123	24.6476917266846	24.7738151550293	24.6138763427734	24.9336071014404				8	8	5	60,9	60,9	46	23,747	0	161,89	2940800000	540	Q06AU6;P20339;P20339-2	Q06AU6;P20339;P20339-2	Ras-related protein Rab-5A	RAB5A
25.0515689849854	24.9846820831299	24.8076686859131	24.7595520019531	24.820032119751	25.3463287353516	24.7037086486816	25.0638732910156	24.6354274749756	25.3307361602783	24.5782527923584	25.2784805297852	24.2937602996826	25.0202045440674	25.0524215698242	24.332576751709	25.1247081756592	25.3868160247803	24.6895008087158	25.6313877105713	25.1797027587891	23.9099559783936				3	3	3	19,1	19,1	19,1	12,059	0	95,939	3782600000	161	P20472	P20472	Parvalbumin alpha	PVALB
26.7455310821533	26.5694770812988	26.7271938323975	26.5558185577393	26.6443367004395	26.5111293792725	26.6085338592529	26.5673637390137	26.6841163635254	26.6980762481689	26.5816326141357	26.6919708251953	26.7958030700684	26.7119884490967	26.5620822906494	26.8030185699463	26.6015129089355	26.5855827331543	26.8364105224609	26.7956295013428	26.8974227905273	26.5343074798584				5	5	5	34,4	34,4	34,4	26,489	0	278,79	11885000000	520	P20618	P20618	Proteasome subunit beta type-1	PSMB1
27.5513172149658	26.8300151824951	26.4387969970703	27.2288856506348	26.4459648132324	26.7586822509766	27.5735054016113	26.894624710083	27.0293159484863	27.4439830780029	27.1217346191406	27.2552795410156	26.7848224639893	26.2696762084961	25.7163867950439	26.0413398742676	26.5882434844971	27.0538444519043	26.6152458190918	27.2937469482422	26.4267616271973	26.9344596862793				3	3	3	35,3	35,3	35,3	16,762	0	30,88	14222000000	130	P20674	P20674	Cytochrome c oxidase subunit 5A, mitochondrial	COX5A
28.1273994445801	28.1830577850342	28.2785186767578	27.8331565856934	27.9537601470947	28.1448211669922	28.1417560577393	28.1758079528809	27.8932819366455	27.743465423584	28.3433876037598	28.1557960510254	27.965763092041	28.0204811096191	28.1331214904785	28.1846008300781	28.0437202453613	28.0300273895264	27.9053707122803	27.9809913635254	28.2617664337158	28.1535911560059				21	21	21	42,5	42,5	42,5	66,408	0	323,31	31974000000	1236	P20700	P20700	Lamin-B1	LMNB1
21.5423316955566	20.2539806365967	19.5175304412842	20.0039749145508	21.199031829834	20.477424621582	21.1454410552979	20.984489440918	21.0800971984863	20.2152538299561	21.3455028533936	21.7180442810059	21.9667987823486	21.4724731445313	22.0747928619385	21.8888816833496	NaN	20.8189697265625	21.7416229248047	21.8467216491699	21.1839790344238	21.1467514038086				3	3	3	7,4	7,4	7,4	66,344	0	8,2982	219580000	83	P20794-3;P20794;P20794-2	P20794-3;P20794;P20794-2	Serine/threonine-protein kinase MAK	MAK
28.773962020874	28.6647872924805	28.876127243042	28.767671585083	28.8442554473877	28.8739032745361	29.0233421325684	28.9041786193848	28.8918552398682	28.9587631225586	28.8341960906982	28.870532989502	28.5231094360352	28.7409286499023	28.680736541748	29.0504817962646	29.029390335083	28.9910926818848	28.840841293335	28.9684143066406	28.6764640808105	28.5852737426758				15	15	14	43,2	43,2	41,6	55,405	0	252,71	53583000000	1655	P20839;P20839-3;P20839-7;P20839-5;P20839-6;P20839-2;P20839-4	P20839;P20839-3;P20839-7;P20839-5;P20839-6;P20839-2;P20839-4	Inosine-5-monophosphate dehydrogenase 1	IMPDH1
22.8728046417236	22.1196956634521	22.358528137207	22.8691234588623	22.2243576049805	22.8363075256348	23.5103816986084	23.2322864532471	22.7044887542725	22.6035861968994	22.7782173156738	22.4761962890625	23.5382328033447	22.6828460693359	22.7113666534424	22.7705039978027	22.8802070617676	21.9935722351074	22.4449062347412	22.6008224487305	21.9940986633301	23.092601776123				10	10	10	15,9	15,9	15,9	100,4	0	39,673	743700000	170	P20936-2;P20936-4;P20936;P20936-3	P20936-2;P20936-4;P20936	Ras GTPase-activating protein 1	RASA1
21.5498065948486	NaN	21.8629493713379	21.606481552124	NaN	NaN	21.6458358764648	20.7751121520996	21.5103149414063	21.8799457550049	22.785364151001	NaN	22.4383163452148	22.2543048858643	22.5131340026855	22.3671970367432	22.0457019805908	21.6715354919434	22.1698379516602	21.4971160888672	22.3287811279297	21.5637893676758				2	2	2	2,9	2,9	2,9	92,619	0	6,798	148340000	15	P21127;Q9UQ88-5;Q9UQ88;P21127-2;P21127-3;Q9UQ88-2;Q9UQ88-3;P21127-8;Q9UQ88-4;P21127-9;P21127-6;P21127-10;P21127-5;P21127-4;Q9UQ88-10;P21127-12;Q9UQ88-9;Q9UQ88-8	P21127;Q9UQ88-5;Q9UQ88;P21127-2;P21127-3;Q9UQ88-2;Q9UQ88-3;P21127-8;Q9UQ88-4;P21127-9;P21127-6;P21127-10;P21127-5;P21127-4;Q9UQ88-10;P21127-12;Q9UQ88-9;Q9UQ88-8	Cyclin-dependent kinase 11B;Cyclin-dependent kinase 11A	CDK11B;CDK11A
29.8319244384766	29.8213539123535	29.799201965332	29.7303428649902	29.6889095306396	29.7167167663574	29.8523025512695	29.752742767334	29.5838661193848	29.7542781829834	29.648136138916	29.748779296875	29.3428592681885	29.739408493042	29.4035606384277	29.4942932128906	29.7382316589355	29.8390846252441	29.556095123291	29.8239059448242	29.4357490539551	29.7286109924316				22	22	16	62,6	62,6	44,6	56,5	0	323,31	95729000000	1843	P21281	P21281	V-type proton ATPase subunit B, brain isoform	ATP6V1B2
27.1547679901123	27.25341796875	27.0964698791504	27.4403076171875	27.1282272338867	27.3412590026855	27.1770458221436	27.148323059082	26.9235763549805	26.9758129119873	27.038480758667	27.1461601257324	26.9387817382813	27.1190395355225	26.742000579834	26.8846836090088	27.0785446166992	27.1745662689209	26.9128913879395	27.1542549133301	26.5965843200684	26.9001312255859				9	9	8	28,8	28,8	26,7	43,941	0	323,31	15877000000	488	P21283	P21283	V-type proton ATPase subunit C 1	ATP6V1C1
24.6583366394043	24.9830741882324	24.9374217987061	25.1958770751953	24.8872985839844	24.9759483337402	24.7771492004395	24.8406143188477	25.0875282287598	24.8532810211182	24.4545249938965	24.4069519042969	24.5145988464355	24.6466598510742	24.4372234344482	24.5414085388184	24.5734996795654	24.7053165435791	24.3692531585693	24.36865234375	24.8109893798828	24.68235206604				4	4	4	25,9	25,9	25,9	20,567	0	38,476	3004100000	137	P21291	P21291	Cysteine and glycine-rich protein 1	CSRP1
27.8861427307129	27.7173824310303	27.9029731750488	27.8383235931396	28.0988502502441	27.8737964630127	27.8558464050293	27.7117195129395	28.3272876739502	27.8980941772461	28.3388118743896	27.8826026916504	28.938892364502	28.0032291412354	29.4994449615479	28.9092235565186	28.1008243560791	27.9725208282471	28.9988613128662	27.9219665527344	28.8284645080566	28.1524391174316				48	48	45	29,8	29,8	27,9	280,01	0	323,31	36126000000	2537	P21333-2;P21333	P21333-2;P21333	Filamin-A	FLNA
22.0340881347656	22.1148300170898	21.3005542755127	21.9554824829102	21.5475387573242	22.4329662322998	22.2005996704102	22.1520366668701	22.1401596069336	21.6701183319092	21.6658020019531	21.9607467651367	21.4648036956787	21.3158664703369	21.7152194976807	21.7463531494141	22.0275917053223	21.9742584228516	21.9821128845215	22.2301712036133	21.5072727203369	21.9580898284912				15	15	15	7,6	7,6	7,6	317,03	0	24,381	439460000	184	P21359-2;P21359-6;P21359;P21359-4;P21359-3;P21359-5	P21359-2;P21359-6;P21359;P21359-4	Neurofibromin;Neurofibromin truncated	NF1
23.5151176452637	23.4943752288818	24.6270923614502	23.4970951080322	23.115119934082	24.148567199707	23.3830509185791	22.9382476806641	23.761058807373	23.6206932067871	23.2993831634521	23.2924175262451	23.8864402770996	23.6425971984863	23.7745571136475	23.5950565338135	23.3708820343018	23.820743560791	23.7802772521973	23.6644268035889	23.497350692749	23.7154178619385				5	5	5	7,8	7,8	7,8	98,398	0	30,899	1296400000	122	P21399	P21399	Cytoplasmic aconitate hydratase	ACO1
29.071985244751	29.1263771057129	29.0389823913574	29.0629596710205	29.0386428833008	29.0906810760498	29.0942573547363	29.0867233276367	28.9067821502686	28.8218040466309	28.9087333679199	29.0309085845947	28.4555320739746	28.9556694030762	28.2191047668457	28.7530574798584	29.0294418334961	28.9635410308838	28.5604991912842	29.0255928039551	28.7186222076416	29.0149307250977				19	19	12	50,9	50,9	38,6	47,573	0	293,08	56950000000	1248	P21579	P21579	Synaptotagmin-1	SYT1
22.2910270690918	22.456298828125	NaN	22.4983348846436	21.7201290130615	21.796537399292	22.074390411377	22.0491237640381	22.3329792022705	22.3355827331543	22.1201057434082	NaN	21.3831615447998	21.8392181396484	21.6117630004883	22.5444259643555	22.715353012085	22.4888381958008	24.1667537689209	22.5489826202393	21.4787979125977	22.0399513244629				3	3	3	7,6	7,6	7,6	57,948	0	17,828	318790000	62	P21589-2;P21589	P21589-2;P21589	5-nucleotidase	NT5E
22.0838088989258	22.766471862793	22.492259979248	22.3712730407715	22.1721363067627	22.5925979614258	22.6402702331543	21.9684600830078	21.9849185943604	22.0057621002197	21.8550701141357	NaN	21.5157947540283	22.2069091796875	21.7879066467285	22.2533855438232	22.1051445007324	22.434419631958	22.5743885040283	22.5753402709961	22.452600479126	22.1486339569092				3	3	3	10,7	10,7	10,7	43,122	0	11,172	463990000	77	P21953;P21953-2	P21953;P21953-2	2-oxoisovalerate dehydrogenase subunit beta, mitochondrial	BCKDHB
20.3702869415283	21.492992401123	21.5984153747559	20.9312858581543	23.1308631896973	NaN	22.8269653320313	21.5350875854492	21.5411376953125	21.3201332092285	21.186128616333	NaN	22.2798671722412	21.2281017303467	22.4791374206543	22.2533683776855	22.2949638366699	20.5344047546387	21.7292346954346	20.8596725463867	21.9456787109375	20.6689949035645				2	2	2	7,4	7,4	7,4	38,67	0	62,115	203180000	39	P21980-3;P21980-2;P21980	P21980-3;P21980-2;P21980	Protein-glutamine gamma-glutamyltransferase 2	TGM2
24.3832702636719	23.444766998291	23.728588104248	23.6904582977295	23.9791374206543	23.8796844482422	23.5018692016602	24.1784515380859	23.6430282592773	23.8594818115234	23.6632289886475	23.3759918212891	24.052339553833	24.0505676269531	24.0042858123779	24.1649951934814	23.5764255523682	23.5174789428711	23.6516361236572	23.8895416259766	23.7901763916016	24.1195602416992				5	5	4	9,5	9,5	7,6	89,42	0	9,3415	1597800000	121	P22059;Q969R2-4;Q969R2-6;Q969R2-3;Q969R2-2;Q969R2	P22059	Oxysterol-binding protein 1	OSBP
25.3295078277588	25.5808258056641	25.7607116699219	24.9522399902344	25.49977684021	25.3755149841309	25.2735004425049	25.3892765045166	25.5258197784424	25.2825794219971	25.4469184875488	25.7743759155273	25.4951019287109	25.4765491485596	25.4247493743896	25.6795463562012	25.2987689971924	25.2729434967041	25.3287487030029	25.2340202331543	25.2270050048828	25.0529613494873				6	6	5	35,8	35,8	32,4	33,784	0	35,516	4997200000	353	P22087	P22087	rRNA 2-O-methyltransferase fibrillarin	FBL
23.6435241699219	22.5718231201172	23.0596313476563	22.9222240447998	23.3735485076904	23.4709453582764	23.4708786010742	23.2580318450928	23.3328132629395	23.1504554748535	23.3315010070801	23.4325656890869	24.3471450805664	23.3621921539307	24.1008071899414	23.118335723877	22.9779033660889	22.1586608886719	24.0567893981934	23.154504776001	23.5280914306641	23.032205581665				5	5	5	8	8	8	107,77	0	22,886	1227800000	221	P22102;P22102-2	P22102	Trifunctional purine biosynthetic protein adenosine-3;Phosphoribosylamine--glycine ligase;Phosphoribosylformylglycinamidine cyclo-ligase;Phosphoribosylglycinamide formyltransferase	GART
24.1130638122559	24.1385116577148	24.2140045166016	24.3084011077881	24.1376609802246	24.1515369415283	24.1853065490723	23.9685516357422	24.1182022094727	23.9220924377441	24.1967449188232	23.8457183837891	24.3811836242676	24.0351104736328	24.6702709197998	24.4913005828857	24.1376647949219	24.0185832977295	24.8632907867432	24.3896808624268	24.6839561462402	24.4525413513184				4	4	4	12,9	12,9	12,9	47,079	0	109,85	2287100000	326	P22234;P22234-2	P22234;P22234-2	Multifunctional protein ADE2;Phosphoribosylaminoimidazole-succinocarboxamide synthase;Phosphoribosylaminoimidazole carboxylase	PAICS
21.2420654296875	20.9623069763184	21.4244079589844	21.4518299102783	21.0127334594727	21.9264335632324	21.6764297485352	21.0941352844238	21.7065773010254	21.2717418670654	21.1360130310059	21.1654853820801	NaN	21.0540084838867	21.0064163208008	20.1429538726807	21.7081756591797	NaN	22.4803619384766	21.9365978240967	21.2577037811279	21.5340766906738				2	2	2	4,8	4,8	4,8	65,559	0	7,1978	231340000	73	P22303-4;P22303;P22303-2;P22303-3	P22303-4;P22303;P22303-2;P22303-3	Acetylcholinesterase	ACHE
20.0663146972656	NaN	20.5460433959961	20.3516693115234	21.0105152130127	19.5367050170898	20.3348369598389	20.4962882995605	19.8315334320068	NaN	20.2179775238037	20.1741409301758	19.7716083526611	20.3425617218018	20.2576465606689	19.5796966552734	20.0197868347168	NaN	20.4988212585449	20.6182708740234	NaN	20.9303417205811				3	3	3	19,3	19,3	19,3	15,079	0,0028646	2,2224	40369000	19	P22307-6;P22307-2;P22307-4;P22307-7;P22307-8;P22307	P22307-6;P22307-2;P22307-4;P22307-7;P22307-8;P22307	Non-specific lipid-transfer protein	SCP2
29.240592956543	29.0671730041504	29.0354309082031	29.0567321777344	29.0765380859375	29.0136737823486	29.1454887390137	29.1621894836426	29.1478157043457	29.148983001709	29.1187419891357	29.2987384796143	29.2220706939697	29.1819171905518	28.9936485290527	29.0649719238281	29.1761817932129	29.1718406677246	29.1310901641846	29.0067234039307	29.1331920623779	29.0964012145996				27	27	27	39,3	39,3	39,3	113,8	0	323,31	65339000000	2335	P22314-2;P22314	P22314-2;P22314	Ubiquitin-like modifier-activating enzyme 1	UBA1
30.2572593688965	30.2680702209473	30.1411514282227	30.2103366851807	30.2242660522461	30.2111873626709	30.1469860076904	30.2784976959229	30.1865406036377	30.2272796630859	30.311279296875	30.4228496551514	30.2879638671875	30.3072204589844	30.1255111694336	30.2326011657715	30.1928997039795	30.2476024627686	30.1568489074707	30.0682964324951	30.3246002197266	30.3875503540039				17	17	17	57,2	57,2	57,2	37,429	0	323,31	142210000000	2457	P22626;P22626-2	P22626;P22626-2	Heterogeneous nuclear ribonucleoproteins A2/B1	HNRNPA2B1
28.6695785522461	28.8917045593262	28.7473564147949	29.3198947906494	28.9814376831055	29.0504627227783	28.8213768005371	28.9283466339111	29.0156955718994	29.2543640136719	28.5769691467285	29.1402530670166	28.4525547027588	29.2188777923584	28.0934314727783	28.4471855163574	29.1296482086182	29.2940311431885	28.4027118682861	29.3339424133301	28.6532096862793	29.4815998077393				13	13	12	52,8	52,8	48,7	31,54	0	323,31	55172000000	933	P22676	P22676	Calretinin	CALB2
28.049295425415	27.6277389526367	27.5758934020996	27.7208786010742	27.8269023895264	27.8034057617188	27.6669635772705	27.6661109924316	27.7666854858398	27.7688446044922	27.6149425506592	27.902759552002	27.8241481781006	27.6501579284668	27.2532520294189	27.8230361938477	27.9481658935547	27.8277702331543	27.5944080352783	27.7593803405762	27.9899215698242	28.0314960479736				3	3	3	10,4	10,4	10,4	48,442	0	114,11	26027000000	352	P22695	P22695	Cytochrome b-c1 complex subunit 2, mitochondrial	UQCRC2
24.4029293060303	24.5342578887939	23.1124877929688	24.3242645263672	24.2707595825195	24.4070835113525	24.5923900604248	24.7601509094238	24.3501586914063	24.4195899963379	24.0634803771973	24.4892063140869	24.5622329711914	24.7417449951172	24.8011608123779	24.9765205383301	24.7455921173096	24.8290996551514	24.8404541015625	24.929027557373	24.7923183441162	24.6175403594971				3	3	3	15	15	15	33,969	0	165,74	2810000000	176	P23193;P23193-2	P23193;P23193-2	Transcription elongation factor A protein 1	TCEA1
28.0756759643555	28.0581970214844	28.0884475708008	28.1587772369385	28.0480823516846	27.968807220459	28.0360908508301	28.0091552734375	27.9920806884766	28.0804996490479	27.9392757415771	28.1050453186035	27.5953140258789	28.1492881774902	27.4531021118164	27.6978340148926	27.990421295166	28.0761451721191	27.8815288543701	28.1578712463379	27.9136791229248	28.1013870239258				23	23	2	24,3	24,3	2,5	134,71	0	323,31	29542000000	1414	P23220	P23220
28.0410804748535	28.0962295532227	27.7256698608398	28.0864276885986	27.989013671875	28.101053237915	28.0425148010254	28.1020927429199	27.9664745330811	28.0798110961914	28.1216201782227	28.2907772064209	28.2773151397705	28.0620708465576	28.0353050231934	28.1364135742188	28.0163536071777	27.9840602874756	28.0361404418945	27.8998718261719	28.2931213378906	28.3937892913818				14	14	14	30,7	30,7	30,7	76,149	0	152,2	31215000000	1016	P23246;P23246-2	P23246;P23246-2	Splicing factor, proline- and glutamine-rich	SFPQ
24.1767959594727	24.0794353485107	23.6470947265625	23.9334697723389	23.7184448242188	24.1138687133789	23.7846298217773	23.7263355255127	23.8710994720459	23.7663612365723	23.7408828735352	23.9198265075684	23.9456977844238	23.8039207458496	23.6581573486328	23.9120864868164	23.7389297485352	24.1658172607422	24.0507030487061	23.9198532104492	23.5386199951172	23.4924430847168				8	8	8	39	39	39	51,169	0	240,03	1721500000	240	P23258;Q9NRH3	P23258;Q9NRH3	Tubulin gamma-1 chain;Tubulin gamma-2 chain	TUBG1;TUBG2
26.8899536132813	27.0959949493408	27.0221900939941	27.0987453460693	27.1153812408447	27.0131797790527	26.8559265136719	26.9602165222168	27.2454299926758	26.8021602630615	27.210729598999	26.9240245819092	27.1441440582275	27.0924377441406	27.0474967956543	27.1340751647949	26.9157562255859	27.1589393615723	27.1100006103516	26.8055763244629	27.1788291931152	27.0254688262939				8	8	8	34,7	34,7	34,7	23,742	0	144,85	15214000000	622	P23284	P23284	Peptidyl-prolyl cis-trans isomerase B	PPIB
30.284912109375	30.6255149841309	30.3449172973633	30.0056838989258	29.8442764282227	30.5569686889648	30.3329067230225	30.1122779846191	29.9723567962646	30.4606132507324	30.1643562316895	30.2830772399902	29.9563045501709	29.4406433105469	30.4852409362793	29.7582855224609	30.4434909820557	29.8356513977051	30.5983467102051	29.8855876922607	30.5365467071533	30.2602519989014				3	3	3	41,5	41,5	41,5	10,546	0	323,31	153350000000	1358	P23297	P23297	Protein S100-A1	S100A1
21.8735771179199	21.936824798584	21.9147453308105	22.4074897766113	22.2231140136719	22.1532592773438	22.5495109558105	22.0983295440674	21.8541870117188	NaN	22.2893390655518	22.3647804260254	22.3320236206055	21.7292785644531	21.4728870391846	21.9057674407959	21.6864585876465	21.9854774475098	21.5156841278076	21.7355442047119	21.4345073699951	NaN				6	6	6	18,6	18,6	18,6	53,586	0	11,436	302890000	44	P23368-2;P23368	P23368-2;P23368	NAD-dependent malic enzyme, mitochondrial	ME2
24.3092994689941	24.0455627441406	24.1416759490967	24.5475387573242	24.417121887207	24.5536346435547	24.1549777984619	24.3260307312012	24.6140460968018	24.2950019836426	24.5177822113037	24.4434337615967	24.5987243652344	24.1214637756348	24.3051300048828	24.9882640838623	24.2072162628174	24.149435043335	24.6918449401855	23.8394432067871	24.5495700836182	24.4099731445313				8	8	8	14	14	14	112,73	0	33,125	2509700000	299	P23378	P23378	Glycine dehydrogenase (decarboxylating), mitochondrial	GLDC
24.2764110565186	24.4416580200195	24.3996772766113	24.2407150268555	24.3131465911865	24.5830497741699	24.3296737670898	24.2331008911133	24.6334457397461	24.4187717437744	24.4529800415039	24.3577880859375	24.4230003356934	24.6793365478516	24.9887866973877	24.6834297180176	24.6622200012207	24.2513771057129	24.7616195678711	24.3866653442383	24.6648559570313	24.3626689910889				4	4	4	14,4	14,4	14,4	48,851	0	219,07	2640900000	188	P23381-2;P23381	P23381-2;P23381	Tryptophan--tRNA ligase, cytoplasmic;T1-TrpRS;T2-TrpRS	WARS
26.9811820983887	27.1520366668701	27.2560501098633	27.2119026184082	27.2236499786377	27.1576824188232	27.2402172088623	27.2245407104492	27.0918197631836	26.9727401733398	27.2882251739502	27.1545562744141	26.9922370910645	27.1784133911133	27.2743339538574	27.1948757171631	27.0195083618164	27.0737628936768	27.2864685058594	27.0763092041016	27.2018432617188	26.8921928405762				16	16	16	66,3	66,3	66,3	26,688	0	116,42	16569000000	775	Q0Z8U2;P23396;P23396-2	Q0Z8U2;P23396;P23396-2	40S ribosomal protein S3	RPS3
25.5017738342285	25.2863941192627	25.6384429931641	25.3438167572021	25.585729598999	25.5615272521973	25.4038982391357	25.4592819213867	25.0959625244141	25.3439636230469	25.0873794555664	25.3351974487305	25.186279296875	25.2002563476563	25.1373424530029	25.462251663208	25.4304866790771	25.508975982666	25.6944732666016	25.7956809997559	25.0312252044678	25.2977809906006				2	2	2	17,3	17,3	17,3	18,884	0	143,13	5033500000	103	P23434	P23434	Glycine cleavage system H protein, mitochondrial	GCSH
23.3642082214355	23.7249622344971	23.0218486785889	23.3014278411865	22.6750774383545	24.4679908752441	23.2744750976563	22.8232402801514	22.9958400726318	24.373161315918	23.3072071075439	23.7608051300049	23.531946182251	23.8108787536621	23.2719612121582	23.7976837158203	23.0874042510986	23.0692291259766	23.2833099365234	23.2641677856445	23.429859161377	23.1003284454346				2	2	2	13,2	13,2	13,2	33,939	0	16,529	1153700000	134	P23511-2;P23511	P23511-2;P23511	Nuclear transcription factor Y subunit alpha	NFYA
23.4366912841797	23.6231155395508	23.5594444274902	24.0940322875977	24.3640575408936	24.57741355896	23.7391319274902	23.8153781890869	23.4555549621582	23.7668781280518	23.4324188232422	23.35764503479	24.0321044921875	23.0529232025146	23.5624694824219	23.3994293212891	23.9651412963867	24.1072616577148	24.0266036987305	23.7749881744385	23.9529876708984	23.5558547973633				14	5	5	16	7,3	7,3	132,59	0	71,274	1685800000	237	P23634-7;P23634-6;P23634-8;P23634;P23634-5;P23634-4;P23634-3;P23634-2	P23634-7;P23634-6;P23634-8;P23634;P23634-5;P23634-4;P23634-3;P23634-2	Plasma membrane calcium-transporting ATPase 4	ATP2B4
27.8312110900879	27.731258392334	27.7217426300049	27.7164096832275	27.933708190918	27.7612609863281	27.9348316192627	27.8241348266602	27.8061084747314	27.6626052856445	27.9042358398438	27.7314834594727	28.1582050323486	27.8268737792969	28.0200443267822	28.1427803039551	27.9079685211182	27.8691253662109	28.0359668731689	27.9218730926514	27.9120540618896	27.6467113494873				26	26	26	51	51	51	80,769	0	323,31	27075000000	1248	P23687;P48147	P23687;P48147	Prolyl endopeptidase	PREP
20.6291580200195	20.6831436157227	20.6969337463379	20.3478679656982	20.3251457214355	20.7065773010254	20.9352016448975	20.3569889068604	20.7159404754639	19.6785011291504	21.2220134735107	20.7372016906738	21.0951309204102	21.1848011016846	21.7886657714844	21.3213844299316	20.500057220459	20.9939670562744	20.9197368621826	20.788911819458	21.376501083374	20.8526248931885				3	3	3	5,1	5,1	5,1	90,069	0	10,397	107060000	44	P23921;Q76RD8;P20503;P0DSV2;P0DSV1	P23921	Ribonucleoside-diphosphate reductase large subunit	RRM1
24.8846416473389	24.9900035858154	25.3349533081055	24.8406181335449	25.2762908935547	25.213888168335	25.3605365753174	25.238639831543	25.002347946167	24.7267742156982	25.2962188720703	25.5357761383057	24.955358505249	24.9548568725586	24.2662410736084	25.2795848846436	24.9921112060547	25.4577140808105	24.5110778808594	24.7052021026611	24.8437919616699	25.1239910125732				2	2	2	5,8	5,8	5,8	39,186	0	52,482	4034200000	252	P23942	P23942	Peripherin-2	PRPH2
27.7010726928711	27.4592761993408	27.7255783081055	27.7580032348633	27.8607635498047	27.9764442443848	27.723653793335	27.8794040679932	27.4140644073486	27.5287990570068	27.7684516906738	27.6635475158691	27.2551574707031	27.7358055114746	27.8376388549805	27.629508972168	27.5439796447754	27.6904830932617	27.7797946929932	27.9309005737305	27.8686809539795	27.6155853271484				6	6	6	39,1	39,1	39,1	24,763	0	185,52	24405000000	333	P24534;P29412	P24534	Elongation factor 1-beta	EEF1B2
26.2104644775391	26.096019744873	26.6092262268066	26.7457618713379	26.2741012573242	26.2204322814941	26.2947483062744	25.8399047851563	26.1645698547363	25.9747867584229	25.9471874237061	26.0573501586914	25.2137489318848	25.9156036376953	24.9810600280762	25.1963691711426	25.6682281494141	25.5850353240967	25.3828468322754	26.3135604858398	25.2855281829834	25.8464851379395				3	3	3	12,5	12,5	12,5	28,908	0	7,7106	7694100000	318	P24539	P24539	ATP synthase F(0) complex subunit B1, mitochondrial	ATP5F1
24.2877349853516	24.405590057373	24.6791000366211	24.4675006866455	24.5940761566162	24.1381092071533	24.0626163482666	24.1904335021973	24.5307712554932	24.5291976928711	24.1294631958008	24.3894233703613	24.1161632537842	24.3453407287598	23.5840950012207	23.9485054016113	24.4714488983154	24.3160095214844	24.4171161651611	24.4236183166504	23.7802581787109	23.9426155090332				3	3	3	11,9	11,9	11,9	45,199	0	142,18	2241800000	155	P24752;P24752-2	P24752;P24752-2	Acetyl-CoA acetyltransferase, mitochondrial	ACAT1
24.0126190185547	24.0030765533447	24.0983200073242	24.3416976928711	24.0566520690918	24.181884765625	24.3128147125244	24.103084564209	24.0631198883057	24.2032585144043	24.2459774017334	23.9800796508789	24.0003299713135	24.1800270080566	23.8383178710938	24.214075088501	24.1907844543457	24.3807182312012	24.4041366577148	24.069953918457	23.6029281616211	24.1174163818359				13	13	13	12,9	12,9	12,9	217,17	0	103,94	2101000000	487	P24928;P24928-2	P24928	DNA-directed RNA polymerase II subunit RPB1	POLR2A
27.4393672943115	27.6766738891602	27.7330932617188	27.6667594909668	27.7100486755371	27.6248970031738	27.5578861236572	27.5629081726074	27.5483360290527	27.3992080688477	27.4996376037598	27.4398097991943	28.0418167114258	27.7433967590332	28.0335655212402	27.8797779083252	27.6914558410645	27.6562728881836	27.7618598937988	27.6988735198975	27.6632423400879	27.7551727294922				5	5	5	49,2	49,2	49,2	14,515	0	323,31	23429000000	591	P46405;P25398	P46405;P25398	40S ribosomal protein S12	RPS12
21.0363349914551	21.4064769744873	21.1598529815674	21.5022087097168	21.150936126709	21.4761829376221	21.5189895629883	21.3672523498535	21.6719169616699	21.0664100646973	21.5808715820313	20.9362010955811	21.2541313171387	21.2869758605957	21.6308917999268	21.8874015808105	21.1205596923828	21.9159984588623	21.6108226776123	21.8139705657959	21.6725330352783	21.3986587524414				3	3	3	9,2	9,2	9,2	88,06	0	44,175	207070000	74	P25440;P25440-2;P25440-4;P25440-3	P25440;P25440-2	Bromodomain-containing protein 2	BRD2
23.3919906616211	23.6440124511719	23.5265808105469	23.1865997314453	23.4354591369629	23.4197521209717	23.4492664337158	23.1178588867188	23.3460445404053	23.2139225006104	23.3283004760742	22.2764282226563	23.3770141601563	23.2304649353027	23.9048004150391	23.3866863250732	23.3440093994141	23.2174091339111	23.310962677002	23.0911903381348	23.1622524261475	23.8092021942139				5	5	5	19,7	19,7	19,7	38,044	0	23,728	1158200000	164	P25685;P25685-2	P25685;P25685-2	DnaJ homolog subfamily B member 1	DNAJB1
24.0582885742188	24.8942527770996	25.1346530914307	24.8264942169189	24.9306774139404	25.1018180847168	24.9861259460449	25.2285404205322	24.8848190307617	24.9465751647949	24.8055305480957	24.9902191162109	25.4582386016846	24.8943138122559	25.2679023742676	25.2109909057617	25.1603698730469	24.0983982086182	25.0137195587158	25.2364158630371	25.2893104553223	25.1181602478027				7	7	7	35	35	35	29,555	0	134,54	3755300000	415	P25786;P25786-2	P25786;P25786-2	Proteasome subunit alpha type-1	PSMA1
26.8413906097412	26.7245292663574	26.9243621826172	26.482292175293	26.6648979187012	26.8942985534668	26.9598197937012	26.9795570373535	26.8021068572998	26.7834453582764	26.6439304351807	26.616117477417	26.9052238464355	26.8229484558105	27.1904563903809	26.7535762786865	27.0264492034912	26.8366546630859	26.9906425476074	26.9802055358887	26.9251937866211	26.8274269104004				5	5	5	38	38	38	25,898	0	111,32	13466000000	596	P25787	P25787	Proteasome subunit alpha type-2	PSMA2
24.1354351043701	24.4587802886963	24.741174697876	23.9294013977051	24.8163795471191	24.4751777648926	24.320161819458	24.2355308532715	23.9914016723633	23.8275756835938	24.2271347045898	24.4675712585449	23.8754653930664	24.3870582580566	24.2382583618164	24.4396057128906	23.9509372711182	24.3399772644043	24.3243179321289	23.9701957702637	24.5783882141113	24.4998588562012				4	4	4	21,4	21,4	21,4	27,647	0	28,346	2349900000	173	P25788-2;P25788	P25788-2;P25788	Proteasome subunit alpha type-3	PSMA3
26.3388385772705	26.1439666748047	26.5280780792236	26.2254867553711	26.7928237915039	26.4928207397461	26.3426055908203	26.4500980377197	26.2264785766602	26.3416709899902	26.5606746673584	26.2563571929932	26.5918388366699	26.214298248291	26.5465450286865	26.6398887634277	26.347110748291	26.3212547302246	26.6693267822266	26.4946804046631	26.8142395019531	26.1879463195801				6	6	6	37,9	37,9	37,9	29,483	0	201,55	10315000000	385	P25789;P25789-2	P25789;P25789-2	Proteasome subunit alpha type-4	PSMA4
26.7911338806152	26.565824508667	26.7651100158691	26.5474224090576	26.9193344116211	26.83837890625	26.906925201416	26.6384124755859	26.9289836883545	26.767707824707	27.0223407745361	26.5744152069092	27.2385482788086	27.0260143280029	27.8765716552734	27.4329528808594	26.7877330780029	26.5502281188965	27.5945301055908	26.8615627288818	27.2075424194336	26.7894439697266				14	14	7	27,7	27,7	15,9	67,819	0	56,994	14398000000	506	P26038;P26042	P26038;P26042	Moesin	MSN
23.4050235748291	23.4013938903809	23.4501037597656	23.0673408508301	23.0944442749023	23.4327201843262	23.6678924560547	23.0455703735352	23.4339866638184	23.3147010803223	23.959451675415	23.6614723205566	23.7871551513672	23.5694923400879	24.113676071167	23.431131362915	23.3888416290283	23.4149761199951	23.6394691467285	23.46702003479	23.8915958404541	23.5454483032227				12	5	5	26,6	14,9	14,9	68,549	0	104,65	1230600000	173	P26044;P35241;P35241-5;P35241-4;P35241-3;P35241-2	P26044;P35241;P35241-5;P35241-4	Radixin	RDX
25.9515743255615	25.8823299407959	26.0826606750488	26.1154899597168	26.0621776580811	26.2589492797852	26.0125885009766	26.2243385314941	25.9309711456299	25.8773956298828	26.2598667144775	26.054594039917	26.3309803009033	26.3149394989014	26.1102447509766	25.8080883026123	26.2688789367676	26.167387008667	26.0332641601563	26.1359462738037	26.2834663391113	26.1129684448242				12	12	12	35,2	35,2	35,2	54,416	0	219,38	7995100000	626	P26196	P26196	Probable ATP-dependent RNA helicase DDX6	DDX6
24.81028175354	24.9118747711182	24.7563514709473	25.1572608947754	24.9440727233887	25.1768093109131	24.8077564239502	24.8248271942139	24.4214248657227	24.5124759674072	24.6709098815918	24.9859390258789	24.1316184997559	24.9127407073975	24.0822830200195	24.5234413146973	24.9933319091797	25.0304851531982	24.5476989746094	25.1633167266846	24.4223289489746	24.8594799041748				21	16	16	37	29,7	29,7	105,31	0	323,31	3426300000	493	P26232;P26232-2;P26232-5;P26232-3;P26232-4;P26232-6	P26232;P26232-2;P26232-5;P26232-3	Catenin alpha-2	CTNNA2
27.7804737091064	27.849142074585	27.5616436004639	28.0216464996338	27.7608985900879	27.9199829101563	27.9265098571777	27.7220363616943	27.6077442169189	27.5357437133789	27.8138275146484	27.6343040466309	27.5835590362549	27.7837867736816	27.7232608795166	27.6377143859863	27.950366973877	27.8284091949463	27.682445526123	27.7862129211426	27.7527656555176	27.782112121582				9	9	9	39,1	39,1	39,1	53,12	0	323,31	25168000000	1101	P26368-2;P26368	P26368-2;P26368	Splicing factor U2AF 65 kDa subunit	U2AF2
23.9973430633545	24.4840316772461	23.9598503112793	24.6414546966553	24.1592559814453	24.8333797454834	24.2710781097412	24.4845275878906	23.8552551269531	24.2294464111328	23.7362976074219	24.2405624389648	24.0183544158936	24.3179397583008	23.8531475067139	23.5173168182373	24.5550403594971	24.4417037963867	23.1886005401611	24.6462707519531	24.0284099578857	24.1356658935547				8	8	3	25,1	25,1	10,7	42,437	0	70,155	2255900000	204	P26378-3;P26378-4;P26378-2;P26378-5;P26378-1;P26378	P26378-3;P26378-4;P26378-2;P26378-5;P26378-1;P26378	ELAV-like protein 4	ELAVL4
25.8362865447998	25.9914169311523	25.9178924560547	26.2322597503662	26.1064147949219	26.0316410064697	26.1350841522217	25.9646110534668	25.6672973632813	25.8011207580566	25.6599712371826	25.6324329376221	25.9454727172852	25.904993057251	26.069408416748	25.9443130493164	25.9607753753662	26.2283763885498	25.809814453125	25.8225250244141	26.0449638366699	26.0340766906738				7	7	6	13,7	13,7	12,6	83,434	0	48,719	7271600000	432	P26639;P26639-2	P26639;P26639-2	Threonine--tRNA ligase, cytoplasmic	TARS
25.2293949127197	24.9914512634277	24.8806552886963	25.1168327331543	25.2831611633301	25.0336952209473	25.4529552459717	25.3249588012695	25.2192268371582	25.0403156280518	25.2792301177979	25.3569450378418	25.5159130096436	25.5658397674561	25.6634902954102	25.6442985534668	25.3911933898926	25.3240909576416	25.6841678619385	25.1983604431152	25.0854682922363	24.952672958374				11	11	11	13,8	13,8	13,8	140,47	0	42,655	4656500000	392	P26640;P26640-2	P26640	Valine--tRNA ligase	VARS
26.4377899169922	26.1009788513184	26.0157890319824	25.5834941864014	26.5040588378906	26.3640079498291	26.1324729919434	26.3083629608154	25.6828517913818	26.1777648925781	26.1272163391113	26.2162113189697	26.1484069824219	26.1451282501221	26.3044662475586	26.4104671478271	26.2908821105957	26.3335418701172	26.2484836578369	26.3255233764648	26.2837162017822	26.012622833252				3	3	3	19	19	19	15,649	0	27,088	8644100000	201	P26885	P26885	Peptidyl-prolyl cis-trans isomerase FKBP2	FKBP2
NaN	22.4655475616455	22.1283149719238	22.8748149871826	21.2126426696777	21.9263935089111	22.0460567474365	22.5678405761719	21.7739372253418	22.1660308837891	23.6065845489502	NaN	21.5715942382813	22.4525966644287	23.0787544250488	22.0844535827637	22.1079521179199	22.2957077026367	22.9367599487305	22.1099643707275	21.246265411377	21.763973236084				2	2	2	9,5	9,5	9,5	24,252	0	8,0307	388620000	57	P26998	P26998	Beta-crystallin B3;Beta-crystallin B3, N-terminally processed	CRYBB3
22.1244659423828	23.1039199829102	23.1181125640869	22.2604560852051	22.9440612792969	21.8186206817627	22.9101715087891	21.8011054992676	22.597900390625	22.9524803161621	23.1825275421143	22.3551502227783	23.5999374389648	21.5012512207031	23.3901290893555	22.9551086425781	22.3885345458984	22.013240814209	22.8599510192871	22.2021961212158	23.0943088531494	22.2395057678223				3	3	3	16,3	16,3	16,3	31,73	0	159,97	646930000	92	P27105;P27105-2	P27105;P27105-2	Erythrocyte band 7 integral membrane protein	STOM
23.08913230896	23.2041244506836	22.4370651245117	23.0057792663574	23.2921237945557	23.1396541595459	22.9471645355225	22.764030456543	23.5667877197266	23.0731296539307	22.9834327697754	23.0774631500244	22.9402713775635	23.0659255981445	22.65797996521	23.4421710968018	22.8176860809326	22.5851821899414	22.7592658996582	23.1268005371094	22.5109939575195	23.0232925415039				2	2	2	12,6	12,6	12,6	25,268	0,00028927	3,1638	743650000	101	P27144	P27144	Adenylate kinase 4, mitochondrial	AK4
28.7661094665527	29.0246124267578	29.2542877197266	29.0374126434326	28.8444690704346	28.8304347991943	28.9550457000732	28.7054100036621	28.5521697998047	28.7742023468018	28.6984176635742	28.676628112793	28.6993064880371	29.0532093048096	28.8533973693848	28.7738075256348	28.9742546081543	29.0008964538574	28.8817195892334	29.0627918243408	28.8048973083496	28.9558296203613				15	12	12	59,2	55,9	55,9	27,764	0	323,31	55370000000	1023	P27348;P31947-2;P31947	P27348	14-3-3 protein theta	YWHAQ
24.4424495697021	24.4639301300049	24.2257881164551	24.6718826293945	24.2717018127441	24.4820175170898	24.2802810668945	24.6799049377441	24.6615371704102	24.6703929901123	25.0863914489746	24.8299789428711	25.0858707427979	23.9320220947266	24.6118412017822	24.6714973449707	24.3078956604004	24.6134281158447	24.722993850708	24.3503360748291	24.7429981231689	24.5395088195801				4	3	3	22,1	17,6	17,6	38,274	0	13,184	2774500000	199	P27361-2;P27361-3;P27361	P27361-2;P27361-3;P27361	Mitogen-activated protein kinase 3	MAPK3
23.3324890136719	22.9579486846924	23.6302394866943	22.9871940612793	23.0920543670654	23.2807121276855	22.7141551971436	22.9221839904785	23.458740234375	23.0645809173584	23.1673927307129	23.012622833252	22.7019691467285	22.9600849151611	22.8688812255859	23.0214653015137	23.2743434906006	22.7865695953369	23.1726322174072	23.4227523803711	23.2181854248047	23.3469886779785				5	5	4	9,2	9,2	6,6	81,438	0	15,214	1016300000	147	P27448-3;P27448-7;P27448;P27448-2;P27448-6;P27448-4;Q7KZI7-9;Q7KZI7;Q7KZI7-6;Q7KZI7-3;Q7KZI7-14;P27448-8;Q7KZI7-12;Q7KZI7-8;Q7KZI7-4;Q7KZI7-16;Q7KZI7-5;Q7KZI7-15;Q7KZI7-2;Q7KZI7-7;Q7KZI7-13;Q7KZI7-10;Q7KZI7-11;Q9P0L2-2;Q9P0L2-3;Q9P0L2	P27448-3;P27448-7;P27448;P27448-2;P27448-6;P27448-4;Q7KZI7-9;Q7KZI7;Q7KZI7-6;Q7KZI7-3;Q7KZI7-14;P27448-8;Q7KZI7-12;Q7KZI7-8;Q7KZI7-4;Q7KZI7-16;Q7KZI7-5;Q7KZI7-15;Q7KZI7-2;Q7KZI7-7;Q7KZI7-13;Q7KZI7-10;Q7KZI7-11	MAP/microtubule affinity-regulating kinase 3;Serine/threonine-protein kinase MARK2	MARK3;MARK2
23.410249710083	24.8309173583984	25.1030521392822	25.123722076416	25.7441940307617	24.7755241394043	23.7104301452637	23.5751800537109	26.5917224884033	26.8385162353516	25.0061225891113	25.0538711547852	27.9892024993896	26.4788932800293	27.0895004272461	27.5047035217285	22.6673450469971	25.9656162261963	27.5488815307617	25.2819671630859	28.805871963501	27.1808376312256				19	19	18	40,3	40,3	38,5	75,586	0	161,33	10159000000	622	P27594;P20591-2;P20591;P20592-2;P20592	P27594
21.694694519043	21.5878925323486	21.5062580108643	21.390266418457	21.7871952056885	21.6326370239258	21.8459396362305	21.361909866333	21.8062896728516	21.3757171630859	21.6671810150146	NaN	21.4704494476318	21.6124496459961	21.5579624176025	21.0850677490234	22.0521774291992	21.7802772521973	22.3610095977783	21.9427585601807	22.3808422088623	21.5230102539063				4	4	4	6,5	6,5	6,5	68,137	0	4,8396	338860000	85	P27694	P27694	Replication protein A 70 kDa DNA-binding subunit;Replication protein A 70 kDa DNA-binding subunit, N-terminally processed	RPA1
27.7674121856689	27.9935417175293	28.0915031433105	28.1025695800781	27.8996925354004	28.0020637512207	28.075267791748	28.3151741027832	28.1419048309326	28.1911582946777	27.9727363586426	27.9618911743164	27.9146423339844	28.0540657043457	27.6580657958984	28.1875228881836	28.055347442627	28.0722999572754	28.1781177520752	28.4643611907959	27.8956356048584	27.7887783050537				9	9	9	35,2	35,2	35,2	35,554	0	208,41	31053000000	636	P27695	P27695	DNA-(apurinic or apyrimidinic site) lyase;DNA-(apurinic or apyrimidinic site) lyase, mitochondrial	APEX1
24.1912384033203	23.8883399963379	24.3366775512695	24.1622886657715	24.0524139404297	24.3250026702881	24.4589786529541	24.4210166931152	24.2894153594971	23.9868240356445	24.4530048370361	23.9881153106689	23.9225120544434	24.3232250213623	24.7694778442383	24.7714500427246	24.6208076477051	24.6106700897217	24.4947185516357	24.2294940948486	24.1273345947266	24.1829242706299				17	17	17	11,9	11,9	11,9	242,98	0	180,68	2396400000	490	P27708	P27708	CAD protein;Glutamine-dependent carbamoyl-phosphate synthase;Aspartate carbamoyltransferase;Dihydroorotase	CAD
22.9019737243652	23.3050384521484	23.2651901245117	23.5639724731445	23.4464073181152	23.2640514373779	23.0525531768799	23.1862850189209	23.3545341491699	23.5582160949707	23.5065879821777	24.0997657775879	23.4879932403564	23.7092990875244	23.5580062866211	23.1881847381592	23.4173278808594	24.0988235473633	23.7305526733398	23.0487976074219	23.6212882995605	23.6029109954834				5	5	5	7,7	7,7	7,7	102,9	0	58,669	1314500000	169	P27816-2;P27816;P27816-5;P27816-6;P27816-4;P27816-7	P27816-2;P27816;P27816-5;P27816-6;P27816-4	Microtubule-associated protein 4	MAP4
28.0978603363037	28.1514167785645	28.2816467285156	28.0973014831543	28.3204765319824	28.3646926879883	28.1582717895508	28.1083221435547	28.2412948608398	27.9736728668213	28.3635559082031	27.9501705169678	27.8707447052002	28.2350730895996	28.2007999420166	28.2774505615234	28.0923881530762	27.9197654724121	28.0584831237793	28.3389720916748	28.1674518585205	28.0323219299316				5	5	5	7,8	7,8	7,8	71,502	0	66,459	34059000000	521	P27824-2;P27824;P27824-3	P27824-2;P27824;P27824-3	Calnexin	CANX
22.7751979827881	23.2989616394043	23.2871437072754	22.7264575958252	22.8412857055664	21.8634834289551	22.7500152587891	22.7772979736328	23.512300491333	22.6848182678223	23.4517250061035	21.8596420288086	22.5828495025635	21.6825389862061	23.3494644165039	23.1053695678711	NaN	NaN	23.5656929016113	21.674259185791	23.1418991088867	22.5094203948975				2	2	2	28,1	28,1	28,1	10,704	0	17,045	686530000	73	P27917	P27917
26.3819923400879	26.2075061798096	25.7627620697021	26.2867908477783	26.2056045532227	26.2856101989746	26.1944942474365	26.1200084686279	26.4052963256836	25.8804054260254	25.6858196258545	26.1033897399902	26.6898651123047	26.2479496002197	26.4022769927979	26.4346008300781	26.2324085235596	26.2074584960938	26.5329475402832	26.319709777832	26.5315475463867	26.0066032409668				6	6	6	42,3	42,3	42,3	26,411	0	82,149	9005800000	451	P28066;P28066-2	P28066;P28066-2	Proteasome subunit alpha type-5	PSMA5
22.6826171875	22.1092929840088	22.1859817504883	22.4164886474609	23.2660732269287	22.6251544952393	22.3150405883789	22.4334983825684	22.2255630493164	22.5422248840332	22.6638526916504	22.2518081665039	22.4359798431396	21.6169662475586	22.4210548400879	22.4656257629395	22.3623828887939	22.2480049133301	22.4145526885986	22.639476776123	21.4252986907959	21.609375				6	6	6	38	38	38	28,48	0	87,205	588640000	178	P28074;P28074-3;P28074-2	P28074;P28074-3;P28074-2	Proteasome subunit beta type-5	PSMB5
22.4277324676514	22.3289947509766	22.5250492095947	22.6195640563965	22.5430030822754	22.569314956665	22.6132850646973	22.2668418884277	22.5847625732422	22.5617256164551	22.7656383514404	22.4743766784668	22.5826320648193	22.3222255706787	22.4207363128662	22.5276050567627	22.224796295166	22.5804672241211	22.4613361358643	22.2729015350342	22.2843399047852	22.6700439453125				4	4	4	9	9	9	75,475	0	51,928	459470000	70	P28288;P28288-2;P28288-3	P28288;P28288-2	ATP-binding cassette sub-family D member 3	ABCD3
28.5573959350586	28.53564453125	28.620532989502	28.5821552276611	28.5269718170166	28.8779830932617	28.8652763366699	28.7999076843262	28.5779075622559	28.4895820617676	28.7010307312012	28.6733055114746	28.241153717041	28.6732234954834	28.1561622619629	28.5075340270996	28.6016845703125	28.6218776702881	28.4327793121338	28.6390647888184	28.5074081420898	28.5100955963135				21	21	21	31,5	31,5	31,5	79,467	0	323,31	44183000000	925	P28331;P28331-2;P28331-4;P28331-5;P28331-3	P28331;P28331-2;P28331-4;P28331-5;P28331-3	NADH-ubiquinone oxidoreductase 75 kDa subunit, mitochondrial	NDUFS1
22.2642631530762	22.0793838500977	21.3756923675537	22.3059272766113	22.5094566345215	22.500373840332	22.3500213623047	21.8994293212891	22.075439453125	21.3941307067871	21.9435844421387	22.3759803771973	21.7475852966309	22.020092010498	21.2782936096191	21.5630836486816	22.7013683319092	21.7757453918457	21.7257061004639	22.1232280731201	21.3653888702393	21.7362957000732				4	2	2	10,6	6,2	6,2	45,005	0,00028977	3,1832	490330000	92	P28472-4;P28472-3;P28472-2;P28472	P28472-4;P28472-3;P28472-2;P28472	Gamma-aminobutyric acid receptor subunit beta-3	GABRB3
27.4914970397949	27.4495048522949	27.1688537597656	27.5495853424072	27.5831890106201	27.7156963348389	27.4379920959473	27.3875923156738	27.2382774353027	27.2946605682373	27.3295631408691	27.5661087036133	27.4673614501953	27.5039596557617	27.5545673370361	27.2979316711426	27.3756103515625	27.5029335021973	27.5591239929199	27.5944347381592	27.4809226989746	27.4836654663086				11	11	10	40,6	40,6	36,4	41,389	0	174,13	21316000000	963	P28482;P28482-2	P28482;P28482-2	Mitogen-activated protein kinase 1	MAPK1
29.7762756347656	29.7300586700439	29.6782569885254	29.7643165588379	29.7094879150391	29.6667423248291	29.5067329406738	29.6333904266357	29.7867412567139	29.8186931610107	29.7806854248047	29.8657894134521	29.7382659912109	29.6922340393066	29.8269844055176	29.9356994628906	29.8706455230713	29.7417621612549	29.8033676147461	29.7441844940186	29.8925552368164	29.83984375				14	14	14	50,1	50,1	50,1	48,287	0	256,45	102500000000	2512	P28491;P27797	P28491;P27797	Calreticulin	CALR
22.1939277648926	22.1236705780029	22.2011985778809	22.1521739959717	22.3432750701904	22.0914459228516	22.236364364624	22.4493465423584	22.2374897003174	22.5481052398682	22.3122730255127	22.251895904541	21.1229019165039	22.2277603149414	21.1050777435303	21.6183681488037	21.8425025939941	21.9540596008301	21.8402156829834	21.8043022155762	21.9796276092529	22.1651840209961				3	3	2	16	16	10,4	15,638	0	19,425	480200000	148	P28768	P28768
26.5943450927734	26.4679012298584	26.5495891571045	26.5429420471191	26.7272930145264	26.555305480957	26.6331024169922	26.5059070587158	26.7658195495605	26.5316410064697	26.7667217254639	26.501802444458	26.9024600982666	26.5546417236328	26.965841293335	26.6970825195313	26.6232070922852	26.4176139831543	26.884765625	26.7779846191406	26.7490921020508	26.4780693054199				15	15	15	41,2	41,2	41,2	56,046	0	323,31	11735000000	929	P28839;P28838-2;P28838	P28839
21.8742542266846	22.1285495758057	21.3309059143066	22.0147323608398	21.692798614502	21.7124710083008	21.8562335968018	21.0776519775391	21.565242767334	21.794828414917	21.6922206878662	21.2069931030273	21.7434577941895	21.5779800415039	21.8713474273682	21.6712436676025	21.746545791626	21.7000789642334	22.2156181335449	21.3493270874023	21.7701187133789	21.7019653320313				8	8	8	9,8	9,8	9,8	138,35	0	19,983	304380000	70	P29144	P29144	Tripeptidyl-peptidase 2	TPP2
24.49875831604	24.6271896362305	24.8539600372314	25.0325660705566	24.9867630004883	24.9326515197754	24.7558040618896	24.70188331604	24.9895820617676	24.9173202514648	24.8045997619629	24.89670753479	25.3184432983398	24.5434608459473	24.6087398529053	24.6580352783203	24.8421287536621	24.8348503112793	25.0074462890625	24.7257518768311	24.8864688873291	24.6955451965332				12	12	11	18	18	16,3	109,87	0	257,74	3300200000	400	P29323-2;P29323-3;P29323;P54762-5	P29323-2;P29323-3;P29323	Ephrin type-B receptor 2	EPHB2
27.9410133361816	27.6965618133545	27.9869823455811	28.0257186889648	27.578441619873	27.9846744537354	27.7952098846436	27.634593963623	27.9779853820801	28.1116580963135	28.1008605957031	27.6529407501221	27.7089958190918	28.038688659668	28.033224105835	27.7335586547852	28.2936363220215	27.9370784759521	28.1393623352051	28.0442981719971	27.7180633544922	27.4234275817871				11	11	11	26,2	26,2	26,2	67,877	0	145,61	28321000000	579	P29401;P29401-2	P29401;P29401-2	Transketolase	TKT
22.0148448944092	22.0165214538574	22.0693168640137	22.7144336700439	22.2668609619141	21.5094356536865	21.8819179534912	22.6590385437012	22.1889381408691	22.4951553344727	22.4613037109375	22.2410106658936	22.3802356719971	22.3395385742188	21.7801208496094	21.9569263458252	22.2037677764893	21.9771537780762	22.7118453979492	22.2461280822754	21.9270877838135	22.1664581298828				4	4	4	10,7	10,7	10,7	71,407	0	20,32	575330000	139	P29692-2;P29692-3;P29692;P29692-4	P29692-2;P29692-3;P29692;P29692-4	Elongation factor 1-delta	EEF1D
27.4984397888184	28.822265625	26.3768463134766	27.0823001861572	26.035192489624	26.2030029296875	25.7834396362305	26.8201789855957	28.5524024963379	27.7164192199707	26.4898204803467	26.1922817230225	28.3669967651367	26.4506130218506	28.6413269042969	27.4313354492188	26.3598403930664	26.0564823150635	28.0299587249756	26.7163887023926	27.6943511962891	26.9409866333008				7	7	7	34,3	34,3	34,3	38,424	0	226,96	19594000000	560	P29700	P29700
22.8735733032227	23.114278793335	22.9977340698242	23.0648708343506	22.9083404541016	22.973991394043	22.9853744506836	23.056713104248	22.9403915405273	23.1436519622803	23.0096855163574	23.1128997802734	22.7324733734131	23.4044990539551	22.4897308349609	22.7617206573486	23.317943572998	23.2061824798584	22.5234603881836	22.9043197631836	22.4765625	23.0470771789551				9	9	9	70,8	70,8	70,8	15,565	0	68,703	904780000	445	P29762;P29373	P29762	Cellular retinoic acid-binding protein 1	CRABP1
27.6947059631348	27.5626602172852	27.7348518371582	27.6573390960693	27.812141418457	27.7979431152344	27.814432144165	28.0135803222656	27.7390441894531	27.6147727966309	27.4475173950195	27.4631671905518	27.5623016357422	27.8149642944336	27.2708282470703	27.4588222503662	27.7251243591309	27.5389194488525	27.3378410339355	27.6924228668213	27.2242736816406	27.4041862487793				11	11	11	42,2	42,2	42,2	43,121	0	243,08	23204000000	729	P29804;P08559;P08559-4;P08559-3;P08559-2;P29803	P29804;P08559;P08559-4;P08559-3;P08559-2	Pyruvate dehydrogenase E1 component subunit alpha, somatic form, mitochondrial	PDHA1
24.3962249755859	24.1124782562256	25.0712966918945	24.6777076721191	25.0987205505371	25.0882778167725	24.4631824493408	24.8019142150879	24.2258148193359	24.4720363616943	24.215633392334	24.6367168426514	23.5562629699707	24.669750213623	23.0679588317871	23.9099636077881	24.758918762207	25.2399940490723	24.1989288330078	24.8884086608887	23.7850437164307	24.4569225311279				8	8	7	14,3	14,3	13	79,585	0	96,656	2759700000	259	P29973;P29973-2	P29973;P29973-2	cGMP-gated cation channel alpha-1	CNGA1
26.3444061279297	26.3026504516602	26.1836910247803	26.3424339294434	26.4473419189453	26.3466148376465	25.9924583435059	26.1307430267334	26.3681240081787	26.3782043457031	26.3692779541016	26.5223922729492	26.1324920654297	26.3096675872803	26.1066665649414	26.4405059814453	26.0396957397461	26.4168357849121	26.2148361206055	26.2780838012695	26.2576751708984	26.2624549865723				5	5	5	25,3	25,3	25,3	28,993	0	95,985	9241700000	474	P30040	P30040	Endoplasmic reticulum resident protein 29	ERP29
23.9480152130127	23.8347015380859	24.2825126647949	23.7710723876953	23.8188858032227	24.0183525085449	24.071849822998	24.0577087402344	24.4920120239258	24.4976654052734	24.6888751983643	23.735502243042	25.6672706604004	23.886323928833	24.7740058898926	24.880313873291	24.0096473693848	23.8563861846924	24.2929039001465	23.8652000427246	24.3540191650391	23.6538925170898				2	2	2	18,9	18,9	18,9	22,119	0	22,35	2122800000	152	P30043	P30043	Flavin reductase (NADPH)	BLVRB
28.0467128753662	28.2757415771484	28.2131195068359	28.2979393005371	28.1905364990234	28.4108295440674	28.0005569458008	28.3116989135742	27.9388656616211	28.2231941223145	27.8069667816162	28.4069881439209	27.7635517120361	28.1805381774902	27.9413070678711	28.2672252655029	28.0892372131348	28.2220916748047	28.0317668914795	28.3185939788818	27.9751605987549	28.1991996765137				7	7	7	42	42	42	17,031	0	229,07	32761000000	523	P30044-2;P30044;P30044-3;P30044-4	P30044-2;P30044;P30044-3	Peroxiredoxin-5, mitochondrial	PRDX5
26.474910736084	26.5244178771973	26.7809677124023	26.7608985900879	26.8576107025146	26.7352676391602	26.6331748962402	26.5350723266602	26.6181888580322	26.4869384765625	26.6103591918945	26.6994075775146	26.0999507904053	26.419979095459	26.0182838439941	26.3339958190918	26.579418182373	26.5514373779297	26.4704570770264	26.412654876709	26.4470062255859	26.1361122131348				3	3	3	16,8	16,8	16,8	25,838	0	29,133	10831000000	299	P30048-2;P30048	P30048-2;P30048	Thioredoxin-dependent peroxide reductase, mitochondrial	PRDX3
18.9362392425537	18.9046211242676	18.3359069824219	18.7905025482178	18.8869895935059	18.5645656585693	18.7828407287598	18.4537467956543	18.7870979309082	19.0026931762695	18.84543800354	18.8348941802979	18.264720916748	18.8428497314453	18.442045211792	18.7624969482422	18.8069591522217	18.560131072998	18.5026626586914	18.8294486999512	18.5654983520508	17.69970703125				2	2	2	9,5	9,5	9,5	17,49	0,00056786	2,9492	40762000	72	P30049	P30049	ATP synthase subunit delta, mitochondrial	ATP5D
26.6073608398438	26.2734375	26.4165592193604	26.4704933166504	26.4030494689941	26.3622207641602	26.5572280883789	26.372652053833	26.4835395812988	26.4130325317383	26.1989059448242	26.8121490478516	26.6435699462891	26.6606941223145	26.7063541412354	26.4478874206543	26.4700126647949	26.5727634429932	26.5983066558838	26.670690536499	26.5381259918213	26.2852344512939				6	6	6	54,5	54,5	54,5	17,818	0	159,33	10573000000	422	P30050;P30050-2	P30050;P30050-2	60S ribosomal protein L12	RPL12
30.5522193908691	30.6375541687012	30.9146842956543	30.6620483398438	30.6875991821289	30.6673049926758	30.5722465515137	30.4957752227783	30.6632843017578	30.6349868774414	30.7919158935547	30.7724838256836	30.6594905853271	30.8044853210449	30.4525089263916	30.72580909729	30.9114055633545	30.5634384155273	30.765474319458	30.918119430542	30.6055297851563	30.6440696716309				7	7	7	36,9	36,9	36,9	21,057	0	323,31	192530000000	969	P30086	P30086	Phosphatidylethanolamine-binding protein 1;Hippocampal cholinergic neurostimulating peptide	PEBP1
28.9983234405518	28.9066123962402	28.7442531585693	28.8062400817871	28.8921871185303	28.8356781005859	28.7934036254883	28.8541946411133	28.8734912872314	28.9292945861816	28.9416961669922	28.8648281097412	29.0860958099365	28.7414112091064	28.9500598907471	28.9731140136719	28.8777770996094	28.8895416259766	28.9764633178711	28.667854309082	28.9664669036865	28.6811103820801				15	15	15	32,7	32,7	32,7	56,782	0	323,31	54887000000	1491	P30101	P30101	Protein disulfide-isomerase A3	PDIA3
23.6893482208252	23.8226318359375	23.9719219207764	23.7014846801758	23.6465549468994	23.9490413665771	23.7765121459961	23.9133930206299	23.6551342010498	23.6270656585693	23.4152145385742	23.8674736022949	23.6106853485107	23.8235530853271	23.6693420410156	23.7147254943848	23.7936134338379	24.136962890625	23.8328170776367	23.8849792480469	24.0020561218262	24.1878929138184				7	7	4	24,5	24,5	13,9	48,14	0	101,76	1655300000	244	P30419-2;P30419	P30419-2;P30419	Glycylpeptide N-tetradecanoyltransferase 1	NMT1
24.0621910095215	23.7543601989746	23.9433040618896	23.8558883666992	23.8471088409424	24.182107925415	24.0932235717773	24.2701225280762	23.9816188812256	23.9314670562744	24.0582714080811	23.9228839874268	23.8705177307129	23.7805614471436	23.7448692321777	23.960823059082	23.9371070861816	23.946195602417	23.6802959442139	23.8336791992188	23.9388122558594	23.8184967041016				2	2	2	11,1	11,1	11,1	32,837	0	86,452	1833800000	286	P30519-2;P30519	P30519-2;P30519	Heme oxygenase 2	HMOX2
20.2549095153809	19.9686965942383	20.9259662628174	20.3621253967285	20.2708358764648	20.3880271911621	19.310525894165	20.4121494293213	20.6319961547852	20.1831111907959	20.3096046447754	20.6204166412354	19.3347854614258	19.7875328063965	19.0837593078613	20.3586387634277	20.2899971008301	20.1218643188477	19.6982440948486	19.5795726776123	19.936466217041	20.6775951385498				2	2	2	4,7	4,7	4,7	67,073	0	4,7892	103700000	76	P30531	P30531	Sodium- and chloride-dependent GABA transporter 1	SLC6A1
24.050407409668	23.8620872497559	24.4056053161621	24.4220371246338	24.4436950683594	24.328634262085	24.2097568511963	23.6681213378906	24.152853012085	23.9005355834961	24.0303764343262	23.4373970031738	24.1574077606201	24.890998840332	24.685863494873	24.4775161743164	24.6299057006836	24.3948974609375	24.7853736877441	24.1253719329834	24.3134307861328	24.0300674438477				5	5	5	38,4	38,4	38,4	21,676	0	19,61	2262200000	149	P30626;P30626-2;P30626-3	P30626;P30626-2;P30626-3	Sorcin	SRI
24.3590965270996	24.5126152038574	24.3206195831299	24.4671401977539	24.8582210540771	24.4621353149414	24.3855075836182	24.43284034729	24.21923828125	24.3531951904297	24.771556854248	24.3809261322021	24.5382709503174	24.6123638153076	24.6838474273682	24.9037265777588	24.4411849975586	24.2761287689209	24.5687389373779	24.5073299407959	24.5983142852783	24.6981182098389				9	9	9	13,6	13,6	13,6	133,9	0	99,327	2727800000	325	P30876	P30876	DNA-directed RNA polymerase II subunit RPB2	POLR2B
29.1836547851563	28.7877616882324	28.6699314117432	28.7695198059082	28.8411426544189	28.7765464782715	28.931957244873	29.0512180328369	28.900260925293	28.6490001678467	29.0250434875488	28.8321018218994	28.594841003418	28.8276882171631	28.6853523254395	28.756872177124	28.6602993011475	29.1307621002197	28.6620254516602	28.827766418457	28.7003936767578	29.0450229644775				9	9	6	53	53	32,3	21,921	0	261,6	56065000000	2406	P31006;Q16774-2;Q16774-3	P31006
29.5583724975586	29.6620063781738	29.798942565918	29.7558326721191	29.5988121032715	29.8796043395996	29.6728210449219	29.6160793304443	29.5544452667236	29.4748497009277	29.5766582489014	29.8261985778809	29.5578098297119	29.9048919677734	29.2778549194336	29.5028133392334	29.8228073120117	29.8213481903076	29.3898220062256	29.9330062866211	29.4814758300781	29.5467548370361				22	15	13	54,4	39,1	37,1	50,582	0	323,31	92461000000	1249	P60028;P31150	P60028;P31150	Rab GDP dissociation inhibitor alpha	GDI1
25.613468170166	25.410327911377	25.3892669677734	25.4990997314453	25.5014305114746	25.5917148590088	25.5611419677734	25.3556518554688	25.6598892211914	25.0885562896729	25.342399597168	25.6625442504883	25.8575096130371	25.9629440307617	25.6948719024658	25.3753337860107	25.4770164489746	25.3987197875977	25.7314033508301	25.8128242492676	25.8016223907471	25.3839988708496				7	7	7	28,9	28,9	28,9	43,66	0	80,964	5537100000	343	P31153;P31153-2;Q00266	P31153;P31153-2	S-adenosylmethionine synthase isoform type-2	MAT2A
25.9501857757568	26.0182704925537	26.6795330047607	26.1682395935059	25.9169578552246	26.6808185577393	26.3643207550049	26.2761421203613	26.466983795166	26.2551116943359	26.4465999603271	26.6106357574463	26.1507396697998	26.3845329284668	26.2016468048096	26.4554977416992	26.5946445465088	26.4869422912598	26.063232421875	26.384162902832	26.2964420318604	26.4266510009766				10	7	7	35,6	25,8	25,8	46,302	0	72,964	9457000000	303	P31323	P31323	cAMP-dependent protein kinase type II-beta regulatory subunit	PRKAR2B
25.6354103088379	25.7166194915771	25.8342514038086	25.5966949462891	25.8335857391357	25.99365234375	25.8543510437012	25.6619739532471	25.719409942627	26.0030136108398	25.8634986877441	25.781681060791	26.1028175354004	25.8877429962158	25.748950958252	25.559154510498	25.7037658691406	25.6971645355225	26.2216358184814	25.6620140075684	25.7970104217529	25.9190406799316				11	11	11	38,3	38,3	38,3	44,868	0	136,78	6690700000	596	P31689;P31689-2	P31689;P31689-2	DnaJ homolog subfamily A member 1	DNAJA1
21.756254196167	22.3193626403809	NaN	22.1401481628418	22.2805290222168	21.9043560028076	21.7816276550293	22.7771511077881	21.2670345306396	22.2108993530273	21.7282485961914	NaN	22.4600448608398	21.120138168335	22.0685348510742	NaN	22.562707901001	22.4081840515137	23.0672760009766	22.1832008361816	22.2516193389893	21.379581451416				5	4	4	16,2	11,9	11,9	55,768	0	19,486	243040000	50	P31751;P31751-2	P31751;P31751-2	RAC-beta serine/threonine-protein kinase	AKT2
27.234935760498	27.3157501220703	27.2364482879639	27.1106510162354	27.380012512207	27.1615982055664	27.4372367858887	26.9712772369385	27.4606246948242	27.8818283081055	26.600154876709	27.0415077209473	26.9004554748535	26.5496234893799	26.3142967224121	26.9412727355957	26.6248741149902	26.5515060424805	25.8649234771729	26.4297370910645	25.3278255462646	26.8534069061279				6	6	6	14,6	14,6	14,6	52,645	0	151,1	17493000000	423	P31930	P31930	Cytochrome b-c1 complex subunit 1, mitochondrial	UQCRC1
25.3854637145996	25.1454467773438	25.4630489349365	25.392972946167	25.4090557098389	25.1950645446777	25.5732841491699	25.5495548248291	25.0809707641602	24.9486389160156	25.3602237701416	25.2817974090576	25.1734981536865	25.0799942016602	25.3389778137207	25.0535717010498	25.3204669952393	25.3468589782715	25.169792175293	25.378023147583	25.4210166931152	25.2080764770508				4	4	4	23,2	23,2	23,2	35,329	0	40,307	4616800000	215	P31937	P31937	3-hydroxyisobutyrate dehydrogenase, mitochondrial	HIBADH
23.1279239654541	22.6952934265137	21.7842807769775	22.5961952209473	22.4493541717529	22.3961448669434	23.0502262115479	22.7409706115723	22.9194278717041	22.6244640350342	22.7330913543701	22.6257553100586	22.6911811828613	22.9825878143311	23.4831352233887	23.336067199707	22.9868469238281	22.7167797088623	23.1674289703369	23.1202430725098	22.8822231292725	22.5994167327881				6	6	6	16,8	16,8	16,8	64,523	0	28,158	877010000	146	P31939-2;P31939	P31939-2;P31939	Bifunctional purine biosynthesis protein PURH;Phosphoribosylaminoimidazolecarboxamide formyltransferase;IMP cyclohydrolase	ATIC
26.9594230651855	26.721643447876	26.7778549194336	26.7796401977539	26.9572467803955	26.7796630859375	27.0042915344238	26.9185009002686	26.776725769043	27.0726928710938	26.7573699951172	27.1665573120117	26.9754199981689	27.0257835388184	26.9287147521973	26.6848945617676	26.7119674682617	26.9732990264893	26.5668182373047	26.976526260376	27.0326862335205	27.2224407196045				11	11	11	65,7	65,7	65,7	31,525	0	323,31	14094000000	602	P31942-3;P31942;P31942-4;P31942-2;P31942-5;P31942-6	P31942-3;P31942;P31942-4;P31942-2;P31942-5	Heterogeneous nuclear ribonucleoprotein H3	HNRNPH3
29.1152801513672	28.9718284606934	28.976936340332	28.9964733123779	28.8918266296387	28.8837203979492	28.905387878418	28.9139289855957	29.0731296539307	29.1228065490723	29.0247478485107	29.1274070739746	29.1021385192871	28.9238376617432	29.0215358734131	28.925256729126	28.9553031921387	28.9807147979736	28.911979675293	28.9392166137695	29.1569404602051	29.1319007873535				15	15	10	53,9	53,9	37,6	49,229	0	323,31	59932000000	1534	P31943	P31943	Heterogeneous nuclear ribonucleoprotein H;Heterogeneous nuclear ribonucleoprotein H, N-terminally processed	HNRNPH1
28.9899673461914	28.8245239257813	28.8035106658936	29.0776767730713	29.0351581573486	29.0050983428955	29.1529407501221	29.0430603027344	28.7275581359863	28.8888626098633	29.1753921508789	28.9774322509766	28.7721347808838	28.9784698486328	29.0519924163818	28.7684936523438	29.0569362640381	29.393346786499	29.0522956848145	29.3383541107178	29.2660751342773	29.33864402771				13	10	8	47,5	40,2	33,6	27,85	0	323,31	61677000000	671	P31946-2;P31946	P31946-2;P31946	14-3-3 protein beta/alpha;14-3-3 protein beta/alpha, N-terminally processed	YWHAB
28.076774597168	28.0340061187744	27.877025604248	27.9245109558105	27.9524574279785	28.0877380371094	27.9607162475586	27.8270053863525	27.919038772583	27.9256019592285	27.9302101135254	28.0660037994385	28.0252113342285	28.0051193237305	27.9582557678223	28.0911045074463	27.9871368408203	28.0851516723633	27.9114303588867	28.152099609375	27.7043113708496	27.7155303955078				10	10	10	18,6	18,6	18,6	68,08	0	249,8	29214000000	570	P31948-2;P31948;P31948-3	P31948-2;P31948;P31948-3	Stress-induced-phosphoprotein 1	STIP1
23.1343879699707	23.5530834197998	22.7826862335205	23.4309425354004	23.972354888916	23.2561283111572	23.3211727142334	23.5122337341309	23.3012924194336	23.2362060546875	23.0480308532715	23.0865535736084	22.5788898468018	22.7633838653564	22.3190231323242	23.2115173339844	23.0223655700684	23.3112201690674	22.7269840240479	23.3531837463379	22.6397457122803	23.3380470275879				2	2	2	2,1	2,1	2,1	138,91	0	9,9301	1124500000	99	P32004-3;P32004-2;P32004	P32004-3;P32004-2;P32004	Neural cell adhesion molecule L1	L1CAM
28.8514499664307	28.9944763183594	28.3323383331299	28.7958030700684	29.2145938873291	28.9824123382568	29.1128711700439	29.190637588501	29.3358631134033	29.5069408416748	28.9707412719727	28.9816513061523	29.6345863342285	28.8734073638916	28.2991561889648	29.4658870697021	29.1425113677979	29.1662483215332	29.3086109161377	28.5205097198486	28.8974266052246	28.8102912902832				4	2	2	29,3	19,7	19,7	21,892	0	49,753	65139000000	693	P32119	P32119	Peroxiredoxin-2	PRDX2
23.6016845703125	23.5791988372803	24.1649169921875	24.0468273162842	24.1851463317871	23.9638824462891	23.7037296295166	23.5868034362793	23.9162940979004	23.697696685791	23.9967594146729	24.2004013061523	23.7869091033936	23.8998050689697	23.4320735931396	23.774263381958	23.9287223815918	23.9497470855713	23.6397075653076	23.7828388214111	23.5161056518555	23.8539085388184				3	3	2	8,2	8,2	5,7	57,488	0	21,294	1680400000	176	P32189-1;P32189-4;P32189-2;P32189;Q14409	P32189-1;P32189-4;P32189-2;P32189;Q14409	Glycerol kinase;Putative glycerol kinase 3	GK;GK3P
21.7212162017822	22.352725982666	21.9043369293213	22.6316452026367	22.3310680389404	22.5346927642822	22.2122573852539	22.6911430358887	21.8287334442139	22.1319217681885	22.3092784881592	21.9610710144043	NaN	22.05322265625	21.1828422546387	21.8392276763916	22.2922382354736	22.1249408721924	22.1616859436035	22.2482795715332	22.3771018981934	22.4609928131104				5	5	5	7,6	7,6	7,6	108,55	0	39,43	355930000	82	P32418;P32418-5;P32418-2;P32418-3;P32418-4	P32418;P32418-5;P32418-2;P32418-3;P32418-4	Sodium/calcium exchanger 1	SLC8A1
26.6651248931885	26.1551666259766	25.9603843688965	26.1835174560547	25.9664783477783	26.1458053588867	26.4026832580566	26.5001373291016	26.1886882781982	26.2953643798828	26.5933647155762	26.453104019165	26.6548557281494	26.7421016693115	26.3133602142334	26.4145774841309	26.499584197998	26.5218505859375	26.3751640319824	26.3543663024902	26.5142841339111	26.3144035339355				5	5	5	37	37	37	21,877	0	242,69	9900600000	316	Q5IFJ7;P32969	Q5IFJ7;P32969	60S ribosomal protein L9	RPL9
25.1970977783203	25.3960037231445	25.5755996704102	25.5203609466553	25.5799503326416	25.3816871643066	25.3670806884766	25.2350902557373	25.7380619049072	25.345531463623	25.544490814209	25.484935760498	25.2975578308105	25.5114459991455	25.6500663757324	25.8094005584717	25.4739685058594	25.3993377685547	25.7479858398438	25.360013961792	25.5769367218018	25.510124206543				17	17	12	25,9	25,9	18,3	109,68	0	323,31	5222100000	452	P33176	P33176	Kinesin-1 heavy chain	KIF5B
27.3354530334473	27.1823806762695	26.8274364471436	27.2284603118896	27.2951374053955	26.9071254730225	27.2652893066406	27.3306083679199	27.1223049163818	26.9938488006592	27.2320384979248	27.2708053588867	27.2602767944336	27.2683486938477	27.0690727233887	27.0511436462402	27.1744422912598	27.1396064758301	27.1998100280762	27.0993614196777	26.9748840332031	26.9994277954102				16	16	15	45,8	45,8	43,7	47,526	0	323,31	16683000000	975	P33198;P48735;P48735-2	P33198;P48735;P48735-2	Isocitrate dehydrogenase [NADP], mitochondrial	IDH2
23.3065910339355	23.4973926544189	23.1036071777344	23.1194934844971	23.2005081176758	23.5219612121582	23.6928310394287	23.2249908447266	23.3703899383545	23.5338191986084	23.4496994018555	23.7810077667236	23.3923225402832	23.3342208862305	23.4935035705566	23.4893951416016	23.4300804138184	23.6800708770752	23.471284866333	23.5623817443848	23.7234592437744	23.1889343261719				7	7	2	22,1	22,1	6,6	59,251	0	220,05	1300200000	264	P33240-2;P33240	P33240-2;P33240	Cleavage stimulation factor subunit 2	CSTF2
22.3543720245361	22.6434535980225	22.2594108581543	22.621072769165	22.7066917419434	22.5763454437256	22.0237350463867	21.317798614502	22.0118770599365	22.5576019287109	22.579704284668	22.775426864624	22.6338806152344	22.1310081481934	21.5592460632324	21.9086799621582	22.5720462799072	22.0468330383301	21.8146324157715	22.6403884887695	21.7819900512695	21.8682727813721				8	8	8	15,8	15,8	15,8	81,749	0	10,779	453450000	110	P33402;P33402-3;P33402-2	P33402;P33402-3;P33402-2	Guanylate cyclase soluble subunit alpha-2	GUCY1A2
22.5131855010986	21.8321323394775	22.4834098815918	22.1035995483398	22.3917083740234	22.2416534423828	22.1267776489258	22.5864677429199	22.926477432251	22.3245735168457	22.9921169281006	23.2193756103516	22.8992729187012	22.8026256561279	22.7529468536377	22.7345943450928	22.7108039855957	22.5926265716553	22.5983428955078	22.2308559417725	22.560302734375	22.8037872314453				4	4	3	13	13	10,1	53,454	0	37,259	573650000	81	P34897-3;P34897-2;P34897;P34896-4	P34897-3;P34897-2;P34897	Serine hydroxymethyltransferase, mitochondrial	SHMT2
28.4823608398438	28.5262451171875	28.4426288604736	28.5497665405273	28.6578407287598	28.4953651428223	28.4803409576416	28.5533008575439	28.5132274627686	28.3218307495117	28.5540981292725	28.3308086395264	28.609411239624	28.6934261322021	28.4727153778076	28.5777282714844	28.5626163482666	28.5721206665039	28.3864421844482	28.6235942840576	28.3594722747803	28.465841293335				21	21	19	41,4	41,4	37,9	94,33	0	323,31	42749000000	1464	P34932;P34932-2	P34932	Heat shock 70 kDa protein 4	HSPA4
23.1255893707275	23.0798397064209	23.3522720336914	23.1901359558105	23.3927001953125	23.6783180236816	23.3099212646484	23.8111877441406	23.6318359375	23.7047824859619	23.470832824707	23.7970390319824	23.1237621307373	23.4243202209473	23.0300769805908	23.437162399292	22.9074096679688	23.627368927002	23.7525062561035	23.3686943054199	23.0495796203613	23.8794136047363				3	3	3	6,4	6,4	6,4	46,655	0	24,606	1261700000	163	P34949;P34949-2	P34949	Mannose-6-phosphate isomerase	MPI
22.510124206543	22.4633369445801	22.6650238037109	22.522668838501	22.1561164855957	22.8464298248291	21.9704303741455	22.072208404541	22.156925201416	22.2091407775879	22.2873935699463	23.1969032287598	NaN	22.2594909667969	21.3810119628906	22.2525634765625	22.7502117156982	22.9347763061523	21.034158706665	22.4696254730225	21.0962905883789	22.3579406738281				5	5	5	30	30	30	32,973	0	25,365	465870000	95	P35219	P35219	Carbonic anhydrase-related protein	CA8
27.1602096557617	26.9047031402588	27.2904968261719	27.0891075134277	27.2313995361328	27.2217178344727	27.2518272399902	27.1569423675537	27.257495880127	27.1270923614502	27.432918548584	27.1483612060547	27.673900604248	27.2161388397217	27.6600227355957	27.537504196167	27.3276081085205	27.2010383605957	27.6393947601318	27.2061653137207	27.4412803649902	27.2663688659668				24	24	19	47,5	47,5	39,7	100,07	0	323,31	18097000000	1198	P35221;P35221-2;P35221-3;Q9UI47	P35221;P35221-2;P35221-3	Catenin alpha-1	CTNNA1
27.3083877563477	27.3919200897217	27.261266708374	27.4133834838867	27.4025115966797	27.4061851501465	27.3013687133789	27.361457824707	27.6515140533447	27.6710891723633	27.5570964813232	27.5616683959961	27.8296585083008	27.5084705352783	27.8382949829102	27.6036911010742	27.6204662322998	27.3507709503174	27.7773494720459	27.6102409362793	27.6887969970703	27.5739192962646				21	21	17	44,2	44,2	39,7	85,496	0	323,31	21404000000	1291	P35222	P35222	Catenin beta-1	CTNNB1
27.1643829345703	27.1202602386475	27.3337383270264	26.9733200073242	27.3226318359375	27.2182502746582	27.412109375	27.2261257171631	27.3333530426025	27.2587432861328	27.1255340576172	27.4283962249756	26.9272918701172	27.1110763549805	26.6502227783203	27.1061553955078	27.1190910339355	27.2150611877441	27.2039337158203	27.3024749755859	27.206714630127	27.312671661377				10	10	10	49,6	49,6	49,6	29,804	0	211,9	16922000000	577	P35232;P35232-2	P35232	Prohibitin	PHB
28.6036243438721	28.4775886535645	28.9119338989258	28.6284790039063	28.6282501220703	28.5753345489502	28.6276321411133	28.7170066833496	28.5934925079346	28.5309505462646	28.558952331543	28.5602741241455	28.6804809570313	28.8664321899414	28.3387889862061	28.3862380981445	28.4457511901855	28.7670478820801	28.3563747406006	28.5457363128662	28.7796764373779	28.7744407653809				4	4	4	22,5	22,5	22,5	23,13	0	323,31	46119000000	337	P35243	P35243	Recoverin	RCVRN
NaN	NaN	18.6128463745117	20.2598304748535	20.813232421875	19.471118927002	18.8511142730713	19.2332725524902	20.1223640441895	NaN	19.185848236084	NaN	19.7856597900391	18.9182929992676	19.0658416748047	19.8733043670654	19.989164352417	19.8653507232666	19.622652053833	19.3088359832764	19.7554931640625	20.0792655944824				2	2	2	2	2	2	128,18	0	5,2398	29087000	26	P35251-2;P35251	P35251-2;P35251	Replication factor C subunit 1	RFC1
25.3377723693848	25.240234375	25.1486854553223	25.8055191040039	26.1686267852783	25.5658283233643	25.5369453430176	25.7182693481445	25.3955039978027	26.0278244018555	26.0211658477783	25.5584201812744	24.7579536437988	25.4839515686035	25.6287021636963	25.1701946258545	24.83225440979	26.0380554199219	25.6317253112793	25.4343357086182	26.1898880004883	25.7850189208984				4	4	4	50,8	50,8	50,8	14,759	0	38,194	4922200000	112	P67985;P35268	P67985;P35268	60S ribosomal protein L22	RPL22
25.8846035003662	26.1137313842773	26.3890838623047	26.3103179931641	26.3954067230225	26.5303955078125	25.998987197876	25.8758525848389	26.2535018920898	26.0112571716309	25.8957252502441	25.8788280487061	26.2603149414063	26.1148338317871	25.4602870941162	25.6908283233643	26.0639381408691	26.1376724243164	26.1583251953125	26.3708190917969	25.7188034057617	25.865592956543				17	17	17	13,5	13,5	13,5	174,76	0	78,691	8008400000	555	P35573;P35573-2;P35573-3	P35573;P35573-2;P35573-3	Glycogen debranching enzyme;4-alpha-glucanotransferase;Amylo-alpha-1,6-glucosidase	AGL
28.3413677215576	28.2665119171143	28.0458030700684	28.2503261566162	28.4500312805176	28.2027149200439	28.2823352813721	28.0396728515625	28.3367462158203	27.9970359802246	28.402645111084	28.1716594696045	28.9168586730957	28.1934661865234	29.4100570678711	28.8186054229736	28.2493495941162	28.1452617645264	28.8441963195801	28.3247489929199	28.8017177581787	28.254508972168				37	37	29	25,3	25,3	20,4	226,53	0	323,31	39943000000	2155	P35579;P35579-2	P35579;P35579-2	Myosin-9	MYH9
27.4833965301514	27.3665142059326	27.4293575286865	27.6017513275146	27.4965705871582	27.5698642730713	27.7434425354004	27.5173168182373	27.5465393066406	27.5799121856689	27.5471782684326	27.6650238037109	27.5096092224121	27.5367794036865	27.4912948608398	27.5447311401367	27.7535743713379	27.622200012207	27.3781242370605	27.6652793884277	27.6062850952148	27.5753288269043				35	29	28	24,5	21,5	21	229	0	323,31	22033000000	1574	P35580;P35580-5;P35580-2;P35580-3;P35580-4	P35580;P35580-5;P35580-2;P35580-3;P35580-4	Myosin-10	MYH10
26.1837863922119	26.0879154205322	26.2896881103516	26.1424655914307	26.3920440673828	26.183385848999	26.1952209472656	25.9989814758301	26.4837646484375	26.1907577514648	26.2331924438477	26.1321277618408	26.5379257202148	26.2568321228027	26.4482421875	26.3747138977051	26.2676067352295	26.1341094970703	26.3585624694824	26.2787628173828	26.2730464935303	26.1602935791016				14	14	14	25,8	25,8	25,8	99,045	0	226,25	8809900000	695	P35606-2;P35606	P35606-2;P35606	Coatomer subunit beta	COPB2
25.0355548858643	25.7022018432617	25.4919776916504	25.5709362030029	25.6215267181396	24.2917175292969	25.0494976043701	25.355188369751	25.2658424377441	25.1425037384033	25.1011333465576	24.5698909759521	24.8840885162354	25.4880790710449	25.073169708252	25.2986755371094	25.4757347106934	25.3535957336426	25.1375980377197	25.359317779541	25.1747512817383	25.5571823120117				7	7	6	20,4	20,4	19,2	69,984	0	91,527	4708100000	232	P35611-2;P35611-6;P35611;P35611-3;P35611-4;P35611-5	P35611-2;P35611-6;P35611;P35611-3;P35611-4;P35611-5	Alpha-adducin	ADD1
24.7948951721191	24.697338104248	24.4147605895996	24.5750598907471	24.4716472625732	24.8144683837891	24.4974365234375	24.6527709960938	24.2581939697266	24.3948402404785	24.2842178344727	25.1111793518066	24.6434211730957	24.5400848388672	23.8266220092773	24.2450504302979	24.5976963043213	24.5039443969727	23.7951393127441	24.5102005004883	23.9476547241211	24.5556678771973				6	5	5	16,3	14,8	14,8	62,466	0	242,96	2715200000	183	P35612-2;P35612-8;P35612-9;P35612-4;P35612-3;P35612;P35612-5;P35612-6;P35612-7	P35612-2;P35612-8;P35612-9;P35612-4;P35612-3;P35612	Beta-adducin	ADD2
24.2719688415527	24.6748123168945	23.9824733734131	24.3437614440918	24.4453582763672	24.2916526794434	24.7275657653809	24.4471035003662	24.580493927002	24.7908592224121	24.9025115966797	24.8214702606201	24.5778923034668	24.5563316345215	24.7819213867188	24.797779083252	24.8276062011719	24.7381629943848	24.9956970214844	24.6156387329102	24.967903137207	25.2140369415283				8	8	6	17,5	17,5	17,5	53,354	0	51,144	3008900000	263	P35637-2;P35637	P35637-2;P35637	RNA-binding protein FUS	FUS
25.503173828125	25.7147006988525	25.8852844238281	24.9560050964355	25.9074172973633	25.7319755554199	24.0328159332275	25.0864219665527	25.4161624908447	25.267333984375	25.7778816223145	25.4889659881592	26.029239654541	25.9612617492676	25.9309501647949	25.8353958129883	25.9168148040771	25.9094352722168	25.6762657165527	25.7386684417725	26.0797500610352	25.8205471038818				5	5	5	15,5	15,5	15,5	42,674	0	86,848	5866500000	202	P35659;P35659-2	P35659;P35659-2	Protein DEK	DEK
22.2244300842285	22.8889312744141	22.839672088623	22.1701469421387	22.4202003479004	23.0796165466309	22.8785133361816	23.2228507995605	22.0094089508057	22.4987125396729	23.0533237457275	22.6937313079834	22.6758079528809	23.3646545410156	22.7118606567383	22.3033065795898	23.179370880127	22.567045211792	22.1314125061035	23.2221088409424	22.6878929138184	23.4463119506836				18	13	13	14,3	11,1	11,1	224,33	0	116,05	796900000	173	P35749-3;P35749-2;P35749-4;P35749;P81271	P35749-3;P35749-2;P35749-4;P35749	Myosin-11	MYH11
25.1232147216797	25.0281867980957	25.0759811401367	25.1957302093506	25.1999244689941	25.3620681762695	25.3929901123047	25.0022964477539	25.2608966827393	24.8548412322998	25.2748680114746	25.0886459350586	25.8899936676025	25.464937210083	25.5898742675781	25.3432865142822	25.2141304016113	25.2105903625488	25.44655418396	25.3732585906982	25.5593585968018	25.0822048187256				17	17	17	30,5	30,5	30,5	81,738	0	161,65	4760100000	646	P35750;P07384	P35750
23.9118614196777	23.8979549407959	23.6621742248535	23.5193710327148	23.3273391723633	23.4375915527344	23.5352096557617	23.8963928222656	23.4856662750244	23.6432952880859	23.98166847229	23.523853302002	23.5366821289063	24.0582752227783	23.8636741638184	23.901050567627	24.0951309204102	24.5574417114258	23.766637802124	24.4651107788086	23.9463157653809	23.3500061035156				9	9	7	28,8	28,8	24	51,366	0	50,082	1710900000	278	P35813-3;P35813;P35813-2	P35813-3;P35813;P35813-2	Protein phosphatase 1A	PPM1A
26.7189540863037	26.5909729003906	26.8356552124023	26.8868217468262	27.0974464416504	26.7322406768799	26.8905544281006	26.7963714599609	26.5932674407959	26.6642951965332	26.5439491271973	26.6833000183105	26.8310585021973	27.1340808868408	26.3754386901855	26.6164588928223	26.8455619812012	26.8666229248047	26.5878582000732	26.7996406555176	27.0770053863525	26.8882274627686				12	12	8	15	15	10,1	98,335	0	323,31	13560000000	850	P35913;P35913-2;P35913-3	P35913;P35913-2;P35913-3	Rod cGMP-specific 3,5-cyclic phosphodiesterase subunit beta	PDE6B
20.9136962890625	21.6155204772949	21.5540676116943	21.9416313171387	20.9836921691895	22.0122146606445	21.6338081359863	21.9412384033203	21.5499134063721	22.0598449707031	21.463005065918	22.075777053833	22.0910263061523	21.8864345550537	22.7244167327881	21.7555179595947	21.8462047576904	22.1869792938232	22.1370086669922	22.4999351501465	21.8097305297852	22.1593112945557				6	6	6	7,7	7,7	7,7	151,53	0	26,539	395160000	120	P35968;P35968-2;P35968-3	P35968	Vascular endothelial growth factor receptor 2	KDR
26.5165309906006	26.6721134185791	26.6962966918945	26.5843696594238	26.8073348999023	26.732593536377	26.6003723144531	26.6664447784424	26.5036239624023	26.5550079345703	26.7042827606201	26.5313911437988	26.579568862915	26.6602630615234	26.6524925231934	26.7060928344727	26.5127048492432	26.6888294219971	26.7206745147705	26.7835464477539	26.735424041748	26.5497455596924				17	17	17	49,9	49,9	49,9	48,633	0	134,26	11716000000	729	P35998;P35998-2	P35998;P35998-2	26S protease regulatory subunit 7	PSMC2
22.5784931182861	21.8354930877686	21.785213470459	21.8175354003906	22.3547096252441	22.016242980957	21.9957218170166	21.9248485565186	21.7403564453125	22.3288192749023	21.6389465332031	21.3767566680908	21.4489650726318	20.9566688537598	22.0522918701172	21.1555328369141	22.5807304382324	21.8941192626953	22.5259094238281	21.5500164031982	21.7856483459473	22.2231292724609				3	3	3	22,3	22,3	22,3	20,878	0	145,54	334130000	94	P36404;P36404-2	P36404;P36404-2	ADP-ribosylation factor-like protein 2	ARL2
27.6684226989746	27.6066398620605	27.7488918304443	27.5612754821777	27.6318130493164	27.7633991241455	27.9017753601074	27.6925888061523	27.6177940368652	27.4852714538574	27.6749019622803	27.841609954834	27.6629066467285	27.7552795410156	27.3370265960693	27.6394634246826	27.8089065551758	27.8404331207275	27.6689567565918	27.7923927307129	27.7368774414063	27.6595611572266				11	11	11	68,7	68,7	68,7	20,483	0	320,19	23733000000	953	Q52NJ4;P36405	Q52NJ4;P36405	ADP-ribosylation factor-like protein 3	ARL3
20.8590202331543	20.5977115631104	20.6825103759766	20.5750102996826	20.7104835510254	20.6400871276855	21.05495262146	20.9203872680664	20.870735168457	21.0143165588379	20.9184265136719	20.9815330505371	20.2695465087891	20.790412902832	20.2300815582275	20.5965824127197	20.7535629272461	20.753734588623	20.6097278594971	20.411600112915	19.4561080932617	20.714973449707				4	4	4	14,8	14,8	14,8	32,881	0	5,8011	175100000	122	P36542-2;P36542	P36542-2;P36542	ATP synthase subunit gamma, mitochondrial	ATP5C1
28.0170249938965	27.9880218505859	27.8801555633545	28.0439186096191	27.9536437988281	27.9864597320557	27.9473285675049	27.9272365570068	27.6958351135254	27.9072284698486	27.8073806762695	27.9224834442139	27.3642234802246	27.6306400299072	27.4978370666504	27.6326961517334	28.0724678039551	28.3574333190918	27.6948928833008	27.8738288879395	27.8173542022705	27.6485500335693				8	8	8	29,2	29,2	29,2	26,145	0	242,4	27347000000	675	P36543;P36543-3;P36543-2;Q96A05	P36543;P36543-3;P36543-2	V-type proton ATPase subunit E 1	ATP6V1E1
22.8466644287109	22.7919921875	22.9004898071289	22.9498138427734	22.8693389892578	23.0982036590576	22.986011505127	22.9977073669434	23.138463973999	23.0679035186768	23.330904006958	23.1945171356201	22.9595184326172	22.7340793609619	23.0216102600098	22.9547252655029	23.5644454956055	23.1748313903809	23.1712684631348	23.0004234313965	22.9102306365967	22.9046192169189				3	3	3	9,3	9,3	9,3	50,151	0	28,482	1015500000	148	P36551	P36551	Oxygen-dependent coproporphyrinogen-III oxidase, mitochondrial	CPOX
28.0691547393799	27.848539352417	27.718240737915	27.7743988037109	28.0494976043701	27.8997077941895	27.9031867980957	27.9029903411865	27.8175201416016	27.6496181488037	28.0074863433838	27.9399738311768	28.2549514770508	28.2688446044922	28.1788139343262	28.0586738586426	27.9322509765625	27.9031200408936	28.0715236663818	28.0431079864502	28.2714614868164	27.9514617919922				11	11	11	29,7	29,7	29,7	47,697	0	93,924	29006000000	674	P36578	P36578	60S ribosomal protein L4	RPL4
25.6021041870117	25.2458267211914	25.3536758422852	25.5039081573486	25.2396774291992	25.6836051940918	25.7083988189697	25.3286628723145	25.4088878631592	25.0690326690674	25.2070655822754	25.5801219940186	24.789400100708	25.2005596160889	25.1588668823242	25.3890743255615	25.502046585083	25.4052562713623	25.4206848144531	25.7043151855469	25.4389591217041	25.3744354248047				11	11	11	24,8	24,8	24,8	85,64	0	190,47	5096400000	429	P36776-3;P36776-2;P36776	P36776-3;P36776-2;P36776	Lon protease homolog, mitochondrial	LONP1
29.0930843353271	29.1712379455566	29.1016693115234	29.026195526123	29.0578365325928	29.0531253814697	28.9138774871826	29.1710071563721	29.1201839447021	28.9151134490967	28.8644561767578	29.0008735656738	28.9732704162598	29.226354598999	28.8027248382568	29.0686111450195	28.8958549499512	29.0894317626953	29.1555709838867	28.9486484527588	28.8932838439941	28.9600124359131				17	17	17	39,1	39,1	39,1	61,448	0	248,34	61283000000	1133	P36871;P36871-2;P36871-3	P36871;P36871-2;P36871-3	Phosphoglucomutase-1	PGM1
27.6954383850098	27.718994140625	27.6078395843506	27.7234115600586	27.9182090759277	27.7156448364258	27.7548007965088	27.6470508575439	27.7593688964844	27.5539093017578	27.5992584228516	27.6247901916504	27.7822341918945	27.7627334594727	27.7309017181396	27.6719627380371	27.6525840759277	27.7494316101074	27.8664970397949	27.7944564819336	27.4940147399902	27.7573738098145				14	14	3	50,2	50,2	7,4	36,983	0	193,32	24224000000	795	P36873;P36873-2	P36873;P36873-2	Serine/threonine-protein phosphatase PP1-gamma catalytic subunit	PPP1CC
25.9194374084473	25.7329196929932	25.8552646636963	26.0310115814209	25.795783996582	25.7132015228271	25.9210968017578	25.8674068450928	26.0452995300293	26.1412887573242	25.9604606628418	26.0085258483887	25.2702617645264	25.813756942749	25.5311717987061	25.6624298095703	25.6799449920654	25.7941112518311	25.6344127655029	25.7153205871582	25.7256374359131	25.7810535430908				9	9	5	25,6	25,6	13,7	40,616	0	147,25	6443100000	443	P36887;P17612-2;P17612	P36887;P17612-2;P17612	cAMP-dependent protein kinase catalytic subunit alpha	PRKACA
23.8882217407227	23.9436626434326	23.6171321868896	24.1319217681885	24.1365127563477	24.1318244934082	23.83740234375	24.283597946167	23.7977981567383	23.7860126495361	23.9648551940918	23.8757705688477	23.8031005859375	23.6568489074707	23.975528717041	23.980504989624	23.9702529907227	23.5205478668213	24.0188961029053	24.1373443603516	23.7988891601563	24.0351066589355				9	9	9	17	17	17	68,66	0	65,442	1836500000	314	P36915;P36915-2	P36915;P36915-2	Guanine nucleotide-binding protein-like 1	GNL1
26.4489917755127	26.6216335296631	26.806058883667	26.4297790527344	26.8066444396973	26.7128963470459	26.4611835479736	26.5314826965332	26.997932434082	26.575647354126	26.1021270751953	26.9626369476318	26.5142421722412	27.135612487793	26.4598999023438	26.6203174591064	26.695182800293	26.8703880310059	26.4009799957275	26.747594833374	26.7171211242676	26.6822605133057				5	5	5	30	30	30	19,491	0	78,223	11683000000	348	P36968-2;P36968;P36969-2;P36969	P36968-2;P36968
25.6234378814697	25.5124454498291	25.8810195922852	25.6839656829834	25.4232559204102	25.5985221862793	25.8120880126953	25.6211986541748	25.6895980834961	25.834342956543	25.7989654541016	25.6340675354004	25.4135475158691	25.6293258666992	25.8873424530029	25.554895401001	25.7506408691406	25.7174835205078	25.6620216369629	25.8481483459473	25.8020076751709	25.6100063323975				10	10	10	41,3	41,3	41,3	45,347	0	51,09	5935500000	357	P37111;Q03154-3;Q03154-4;Q03154	P37111
22.2122802734375	22.167350769043	21.5448169708252	22.8808898925781	21.873607635498	22.1696910858154	22.8765983581543	22.3806381225586	23.0438137054443	22.1600799560547	23.102502822876	22.4204978942871	22.5677585601807	22.3110275268555	22.5461616516113	22.9884166717529	21.926721572876	22.4620552062988	22.5840549468994	21.8765754699707	22.58713722229	22.611837387085				3	3	3	9,4	9,4	9,4	53,254	0	7,612	390460000	65	P37198	P37198	Nuclear pore glycoprotein p62	NUP62
25.5319328308105	25.118803024292	25.2364139556885	25.2844352722168	25.2619018554688	25.0771331787109	24.7649421691895	25.0598659515381	25.9667129516602	25.2755794525146	25.6359004974365	25.1994304656982	26.0558853149414	25.2462711334229	27.079906463623	26.2389526367188	25.3041725158691	25.140531539917	26.5112915039063	25.2259788513184	26.0094661712646	25.1854953765869				8	7	7	51,3	44,2	44,2	22,391	0	176,94	5752600000	291	P37802;P37802-2	P37802;P37802-2	Transgelin-2	TAGLN2
22.3166732788086	22.8021221160889	22.3267974853516	22.9879398345947	23.0280666351318	22.7161598205566	22.780632019043	23.0548706054688	22.7440280914307	22.6374950408936	23.0560932159424	22.9278335571289	22.7868843078613	22.9521598815918	22.8791351318359	22.7619953155518	22.5493106842041	22.5682601928711	22.6914100646973	22.7436561584473	22.7187042236328	23.1121368408203				3	3	3	9,2	9,2	9,2	37,54	0	7,8723	821360000	194	P37837	P37837	Transaldolase	TALDO1
27.0474433898926	27.0956516265869	27.3621482849121	26.800537109375	27.0395355224609	27.0101222991943	27.1128959655762	27.1369285583496	26.7918071746826	26.6131763458252	26.7639560699463	27.0054607391357	26.3619480133057	27.0595893859863	26.6508750915527	26.8781490325928	26.7247161865234	27.0576877593994	26.6776714324951	26.8457221984863	26.9421825408936	26.9478302001953				4	4	4	13,8	13,8	13,8	42,331	0	28,34	14215000000	200	P38159;P38159-3;P38159-2;Q96E39;O75526;Q8N7X1	P38159;P38159-3;P38159-2;Q96E39;O75526	RNA-binding motif protein, X chromosome;RNA-binding motif protein, X chromosome, N-terminally processed;RNA binding motif protein, X-linked-like-1;RNA-binding motif protein, X-linked-like-2	RBMX;RBMXL1;RBMXL2
24.9851512908936	24.9880619049072	25.3294448852539	25.0560703277588	24.5431690216064	25.0067577362061	24.5821762084961	25.2628154754639	24.6967239379883	24.7389907836914	24.9918746948242	25.2142181396484	24.2144737243652	25.0795631408691	24.2180595397949	24.4573421478271	24.6286735534668	23.9834232330322	24.443696975708	24.4652843475342	24.35791015625	24.6913204193115				22	2	2	55,6	5	5	68,303	0	27,802	3181000000	138	P38606;P38606-2	P38606;P38606-2	V-type proton ATPase catalytic subunit A	ATP6V1A
28.1477203369141	28.0975036621094	28.1626243591309	28.0400657653809	28.179084777832	28.0767936706543	28.2221488952637	28.1979885101318	28.1349258422852	28.0345764160156	28.1447620391846	28.4239845275879	27.8528823852539	28.1353912353516	27.872917175293	28.1276893615723	28.1850700378418	28.2047958374023	27.9702434539795	28.1554183959961	27.9982032775879	28.1536808013916				19	19	19	35,5	35,5	35,5	73,68	0	323,31	32256000000	1125	P38646	P38646	Stress-70 protein, mitochondrial	HSPA9
25.266056060791	25.4435710906982	25.2258987426758	25.023265838623	24.999340057373	25.7675876617432	25.1736278533936	25.9343814849854	25.186185836792	25.5535259246826	25.4067649841309	25.729175567627	25.5980377197266	25.0748157501221	25.8146686553955	25.7678661346436	25.1221160888672	25.3974285125732	25.2361164093018	25.3996028900146	25.5262928009033	25.490514755249				5	5	5	25	25	25	14,984	0	39,756	4985200000	177	Q29308;P39019	Q29308;P39019	40S ribosomal protein S19	RPS19
26.6925029754639	26.3903560638428	26.3703536987305	26.5342597961426	26.3348960876465	26.3812561035156	26.5467376708984	26.858377456665	26.3695850372314	26.4655628204346	26.7570381164551	26.445011138916	26.3034000396729	26.3787536621094	26.8018112182617	26.4265689849854	26.524959564209	26.3030681610107	26.575511932373	26.4083766937256	26.686092376709	26.5720901489258				6	6	6	20,8	20,8	20,8	46,108	0	71,481	11123000000	436	P39023;Q92901	P39023	60S ribosomal protein L3	RPL3
27.6076774597168	27.6659412384033	27.5976104736328	27.394136428833	27.6186504364014	27.7926864624023	28.0324859619141	27.5056915283203	27.6415023803711	27.53635597229	27.6467361450195	27.4122409820557	27.7020568847656	27.7509250640869	27.6433944702148	27.6759414672852	27.7750244140625	27.7217483520508	27.6066036224365	27.7764015197754	27.5482482910156	27.656608581543				5	5	3	23,7	23,7	18,5	28,585	0	271,23	23819000000	261	P39687	P39687	Acidic leucine-rich nuclear phosphoprotein 32 family member A	ANP32A
22.4757175445557	21.3189373016357	NaN	21.4606494903564	21.1440753936768	21.2337455749512	21.3583221435547	21.1440887451172	21.3916835784912	22.0624179840088	21.7747001647949	21.9018592834473	21.1119613647461	21.0325908660889	21.3014602661133	21.7407569885254	21.3715209960938	21.8709526062012	21.3324661254883	21.059850692749	22.0017375946045	21.1097183227539				3	3	3	15,5	15,5	15,5	42,592	0	9,1074	227450000	65	P39748;P39748-2	P39748;P39748-2	Flap endonuclease 1	FEN1
23.7537517547607	23.6842956542969	23.9763832092285	23.808744430542	24.0634784698486	23.5258445739746	23.8405990600586	23.9189929962158	24.1482467651367	23.8369369506836	24.1080513000488	23.6405296325684	24.4252643585205	23.3707218170166	24.7333126068115	24.815258026123	23.7399387359619	24.0368347167969	24.6036758422852	23.6704845428467	24.836986541748	23.7477016448975				2	2	2	12,1	12,1	12,1	38,498	0	64,485	1967300000	236	P40121;P40121-2	P40121;P40121-2	Macrophage-capping protein	CAPG
28.4075603485107	28.5161437988281	28.2319660186768	28.4525356292725	28.4011306762695	28.4882583618164	28.5295581817627	28.3811111450195	28.4747829437256	28.4518642425537	28.3689517974854	28.6104278564453	28.5998115539551	28.4725170135498	28.4767074584961	28.3321399688721	28.3401527404785	28.4762134552002	28.2266674041748	28.4558372497559	28.3779525756836	28.437047958374				12	12	9	35,6	35,6	29,4	58,024	0	323,31	40216000000	942	P40227;P40227-2;Q29236;Q92526-2	P40227;P40227-2	T-complex protein 1 subunit zeta	CCT6A
NaN	20.3435363769531	20.5279598236084	20.6535091400146	20.3672199249268	20.4687271118164	20.6725311279297	20.4756813049316	20.9572467803955	NaN	20.8716011047363	NaN	20.3082504272461	20.4127712249756	20.9595508575439	20.7252197265625	20.6458435058594	20.5437812805176	20.9691543579102	20.6169128417969	20.8557052612305	20.7032203674316				4	4	4	22,2	22,2	22,2	23,577	0	3,9093	96858000	59	P40429;Q95307;Q6NVV1	P40429;Q95307;Q6NVV1	60S ribosomal protein L13a;Putative 60S ribosomal protein L13a protein RPL13AP3	RPL13A;RPL13AP3
23.8204612731934	23.7848129272461	23.9382266998291	23.7820892333984	24.0830898284912	23.8720664978027	24.3039073944092	23.9156684875488	23.57497215271	23.4540863037109	24.1201705932617	23.7485752105713	24.2476577758789	23.980525970459	23.7924957275391	24.0485591888428	23.7523059844971	24.0464992523193	24.1437301635742	23.9801692962646	24.0993633270264	24.2928619384766				5	5	5	44,5	44,5	44,5	18,565	0	63,789	1816000000	192	P40616-2;P40616	P40616-2;P40616	ADP-ribosylation factor-like protein 1	ARL1
24.2284812927246	24.3613014221191	24.3701114654541	24.0092334747314	24.2405376434326	24.1034889221191	24.0132865905762	24.3963203430176	24.0036849975586	24.2299861907959	24.4027786254883	24.4050674438477	24.2830848693848	24.2980117797852	24.0123977661133	24.576753616333	24.3301658630371	24.5529670715332	24.2324657440186	24.7230415344238	24.1375274658203	23.9619483947754				7	7	7	23,7	23,7	23,7	51,109	0	92,488	2249500000	269	P41091;Q2VIR3;Q2VIR3-2	P41091;Q2VIR3;Q2VIR3-2	Eukaryotic translation initiation factor 2 subunit 3;Putative eukaryotic translation initiation factor 2 subunit 3-like protein	EIF2S3;EIF2S3L
22.8161201477051	22.1377696990967	22.0701503753662	22.8115501403809	23.1209259033203	22.5604629516602	22.1803665161133	22.6429672241211	22.408390045166	22.39914894104	22.82395362854	22.5437965393066	22.178596496582	22.5299777984619	22.6700553894043	22.3844699859619	22.8290748596191	22.9327507019043	22.8126087188721	22.2010345458984	22.8457355499268	22.1074810028076				4	4	4	26,4	26,4	26,4	17	0	9,8709	787990000	157	P41223;P41223-2	P41223;P41223-2	Protein BUD31 homolog	BUD31
21.9849071502686	22.0623455047607	22.0334033966064	21.675329208374	21.6097946166992	21.6892700195313	21.0737495422363	21.7706642150879	21.6986637115479	21.3072738647461	22.0438499450684	21.6019859313965	22.0467357635498	21.6780662536621	21.3742580413818	21.5844593048096	21.3343448638916	21.4131374359131	21.8787612915039	22.6701602935791	21.4491672515869	21.5884590148926				6	6	6	18,2	18,2	18,2	50,704	0	32,598	370480000	180	P41240;P42679-3;P42679;P42679-2	P41240	Tyrosine-protein kinase CSK	CSK
24.1935195922852	23.983959197998	24.2044296264648	24.0118141174316	23.8763103485107	24.3107566833496	24.3801155090332	24.3221740722656	24.1206378936768	24.6568908691406	24.1123924255371	24.0863742828369	24.0808410644531	23.7451210021973	24.6621055603027	24.1943035125732	24.1144409179688	24.0444450378418	24.2262229919434	24.160343170166	24.0760726928711	23.7299652099609				6	6	6	14,6	14,6	14,6	83,165	0	81,442	2060300000	147	P41250	P41250	Glycine--tRNA ligase	GARS
24.5567398071289	24.1003360748291	24.2291660308838	24.7909622192383	24.1850891113281	24.4909896850586	24.5384044647217	24.3836555480957	24.4128017425537	24.2477512359619	24.6818428039551	24.3272609710693	23.8452930450439	23.9032611846924	24.3028755187988	24.4077110290527	24.4403247833252	23.9751300811768	24.3481101989746	24.2356204986572	24.5474872589111	24.0732860565186				6	6	6	6,8	6,8	6,8	144,5	0	24,952	2495800000	236	P41252	P41252	Isoleucine--tRNA ligase, cytoplasmic	IARS
22.8642997741699	22.222038269043	23.0029411315918	22.7986526489258	23.0665550231934	22.6431617736816	23.2074146270752	23.361644744873	23.6236763000488	23.5909976959229	22.333324432373	23.3443851470947	22.706901550293	23.1211471557617	23.6240997314453	23.2066135406494	23.5531272888184	23.1948223114014	23.7577972412109	23.6175594329834	23.0278816223145	21.8747634887695				8	8	8	30,9	30,9	30,9	46,485	0	200,94	1083300000	287	P41367;P11310;P11310-2	P41367
25.7681884765625	25.7164821624756	25.3509750366211	25.3156242370605	25.6681251525879	25.7786884307861	25.9175662994385	25.4134120941162	25.2520065307617	25.4484062194824	25.6874122619629	25.4624900817871	26.1047019958496	25.8247699737549	25.5694961547852	25.5598678588867	25.5920677185059	25.6785278320313	25.5656986236572	26.0816116333008	25.5508079528809	25.5363616943359				6	6	6	74,3	74,3	74,3	12,732	0	172,42	5940100000	320	P41567;P61220;O60739	P41567;P61220;O60739	Eukaryotic translation initiation factor 1;Eukaryotic translation initiation factor 1b	EIF1;EIF1B
22.0205879211426	22.4733219146729	22.2230739593506	21.8547878265381	21.6653823852539	21.6795444488525	21.5341758728027	21.7011756896973	21.7510547637939	21.8605918884277	21.5567932128906	21.2358455657959	21.6216278076172	21.3986358642578	22.1936416625977	21.5355777740479	21.8946285247803	NaN	NaN	21.9095859527588	21.8565444946289	22.5557403564453				3	3	3	8,2	8,2	8,2	68,262	0	69,568	235430000	64	P41743	P41743	Protein kinase C iota type	PRKCI
25.3580722808838	25.4041023254395	25.2161884307861	25.7743606567383	25.494348526001	25.3062038421631	25.4948101043701	25.5794067382813	25.3798751831055	25.6379070281982	25.2429962158203	25.4139308929443	25.3146286010742	25.3548622131348	25.2225131988525	25.5049839019775	25.4999523162842	25.1577701568604	25.3462524414063	25.4626922607422	25.382869720459	25.6766738891602				9	4	4	36,7	20,7	20,7	42,293	0	36,341	5803000000	504	P42025	P42025	Beta-centractin	ACTR1B
27.2438545227051	27.3986854553223	27.4584045410156	26.998420715332	27.4269599914551	27.3111095428467	26.9451026916504	26.8871097564697	27.2682266235352	27.4183082580566	27.5633354187012	27.6300354003906	27.154333114624	27.2720642089844	27.2284202575684	27.3392066955566	27.2313537597656	27.2819652557373	27.3185882568359	27.1227912902832	27.4730739593506	27.5146255493164				8	8	8	31,6	31,6	31,6	38,737	0	178,24	18337000000	435	P42167-2;P42167;P42167-3;P42166	P42167-2;P42167;P42167-3;P42166	Lamina-associated polypeptide 2, isoforms beta/gamma;Thymopoietin;Thymopentin;Lamina-associated polypeptide 2, isoform alpha;Thymopoietin;Thymopentin	TMPO
29.6215972900391	29.5696716308594	30.1178092956543	30.0025787353516	30.1109504699707	30.0558986663818	29.7598876953125	29.8566932678223	29.9656753540039	29.7980117797852	30.0875072479248	30.0579090118408	29.5645198822021	29.6632270812988	29.469841003418	29.8002738952637	29.5920257568359	29.6308345794678	30.0327949523926	30.0368576049805	29.7792263031006	29.7730712890625				26	26	26	52	52	52	61,307	0	323,31	107640000000	2629	P42174;P00367;P00367-3;P00367-2;P49448	P42174;P00367;P00367-3;P00367-2;P49448	Glutamate dehydrogenase 1, mitochondrial;Glutamate dehydrogenase 2, mitochondrial	GLUD1;GLUD2
22.2440567016602	22.4102668762207	22.3782234191895	22.0807151794434	22.6267108917236	21.8255634307861	21.7730293273926	21.8860683441162	21.5045204162598	21.5168075561523	22.0050239562988	21.8288612365723	21.5016326904297	21.51633644104	21.5303630828857	21.8194446563721	21.8862838745117	21.9582633972168	21.572883605957	22.0730857849121	21.666353225708	22.713924407959				5	5	5	9,8	9,8	9,8	93,774	0	7,3909	275940000	75	P42262-4;P42262-2;P42262;P42262-3	P42262-4;P42262-2;P42262;P42262-3	Glutamate receptor 2	GRIA2
22.6385936737061	22.6055107116699	22.3962497711182	22.3449764251709	22.9391670227051	22.5298271179199	23.217227935791	22.2865028381348	22.5899429321289	22.2924060821533	22.5419654846191	22.497537612915	22.5759220123291	22.9223098754883	22.6751804351807	22.827844619751	22.3176879882813	22.5271625518799	22.5789108276367	22.0348339080811	22.9999046325684	22.6469249725342				9	9	9	11,2	11,2	11,2	117,8	0	19,584	702240000	188	P42285	P42285	Superkiller viralicidic activity 2-like 2	SKIV2L2
24.2740440368652	23.9031791687012	23.7252445220947	24.5852241516113	24.2624931335449	24.4407501220703	24.4411354064941	24.2332668304443	24.2986679077148	24.2734031677246	24.0382804870605	24.2025623321533	23.9263038635254	24.1581153869629	24.4122772216797	24.0858955383301	24.32666015625	24.5595588684082	24.7813262939453	24.4070854187012	24.1127891540527	24.1238975524902				23	23	23	13,8	13,8	13,8	288,89	0	103,2	2459300000	383	P42345	P42345	Serine/threonine-protein kinase mTOR	MTOR
22.836935043335	23.1383953094482	22.6613273620605	23.3687744140625	22.774112701416	22.8266277313232	23.5009002685547	22.9361095428467	22.5597991943359	22.1301689147949	22.4966869354248	22.2809391021729	21.9312934875488	22.9233322143555	21.9278240203857	22.7558326721191	22.9859142303467	22.1953754425049	22.4068145751953	23.0646820068359	22.4103336334229	22.445182800293				12	12	12	8,3	8,3	8,3	236,83	0	48,704	760970000	230	P42356;P42356-2;A4QPH2-2;A4QPH2-4;A4QPH2;Q8N8J0	P42356	Phosphatidylinositol 4-kinase alpha	PI4KA
22.5066814422607	21.81858253479	22.0443725585938	22.1170406341553	22.1463432312012	22.2598743438721	22.4049453735352	21.9340744018555	22.5494327545166	22.4156589508057	22.1493377685547	21.9815864562988	22.7889442443848	22.4299640655518	22.3884830474854	22.3240737915039	21.9528160095215	22.1788234710693	22.3836498260498	22.01491355896	22.2363586425781	22.6430168151855				4	4	4	5,9	5,9	5,9	98,655	0	176,84	531990000	116	P42566;P42566-2	P42566;P42566-2	Epidermal growth factor receptor substrate 15	EPS15
24.5641021728516	24.7373924255371	24.7331695556641	24.7451095581055	24.7111663818359	24.8522319793701	24.7951850891113	24.7115631103516	24.750431060791	24.6603527069092	24.8939971923828	24.6848487854004	24.0522632598877	24.9570808410645	24.6507987976074	24.3998355865479	24.645092010498	24.515064239502	24.6178188323975	24.8316497802734	24.129674911499	24.6387462615967				5	5	5	3,9	3,9	3,9	157,9	0	61,617	2999900000	233	P42704	P42704	Leucine-rich PPR motif-containing protein, mitochondrial	LRPPRC
17.4028816223145	17.2428436279297	17.2671966552734	17.4309253692627	17.4212169647217	17.1204261779785	17.710485458374	16.900691986084	17.2592124938965	17.1698932647705	17.7789115905762	17.1772880554199	17.6470584869385	17.6135921478271	17.8159332275391	17.5948524475098	17.422794342041	17.2846279144287	17.4814758300781	17.0389423370361	17.82981300354	17.4082469940186				2	2	2	15,4	15,4	15,4	14,549	0	4,7068	16361000	79	Q29361;P42766	Q29361;P42766	60S ribosomal protein L35	RPL35
21.2738304138184	22.9273796081543	22.0776233673096	21.898365020752	22.0701160430908	22.4565105438232	21.862907409668	21.3781890869141	22.3403701782227	21.0192375183105	22.4155426025391	22.1626472473145	22.1479148864746	22.6585063934326	21.8165378570557	21.6446018218994	21.957347869873	21.1333274841309	21.4857406616211	22.1466484069824	21.7072086334229	21.987606048584				11	11	11	5,4	5,4	5,4	347,6	0	14,068	382380000	80	P42858	P42858	Huntingtin	HTT
28.7804927825928	28.8813285827637	28.8762054443359	28.75412940979	28.8088150024414	28.746711730957	28.751485824585	28.7033004760742	28.4931697845459	28.5651931762695	28.9213333129883	28.4810085296631	28.9438419342041	28.6814746856689	28.8596515655518	28.8402099609375	28.9379749298096	28.7962436676025	29.2327289581299	29.1597728729248	28.9792594909668	29.1008186340332				5	5	5	14,3	14,3	14,3	55,148	0	312,09	53834000000	718	P43003-2;P43003;P48664-2;P48664	P43003-2;P43003	Excitatory amino acid transporter 1	SLC1A3
24.0664405822754	24.0270309448242	23.8059234619141	23.8834495544434	23.8929672241211	24.0246810913086	24.3034839630127	24.1152935028076	23.3000564575195	23.3607444763184	24.4035301208496	23.8528022766113	23.9427719116211	23.5008010864258	23.9564170837402	23.9713344573975	23.7642250061035	24.0446109771729	24.2125549316406	23.7970371246338	24.0249118804932	23.9695835113525				5	5	5	13,7	13,7	13,7	55,722	0	14,342	1631100000	135	P43007;P43007-2	P43007	Neutral amino acid transporter A	SLC1A4
22.8537254333496	23.1829490661621	23.116886138916	23.146900177002	22.8512420654297	22.9510078430176	23.0199127197266	23.0836524963379	22.7437419891357	23.2526798248291	22.9377937316895	23.076847076416	22.8195838928223	23.1236152648926	22.9029102325439	21.9879760742188	23.0584468841553	23.2125091552734	22.816556930542	23.1896839141846	22.6255302429199	23.3450202941895				10	10	10	42	42	42	46,637	0	40,526	950630000	298	P43034;Q9GL51;Q5IS43;P43034-2	P43034;Q9GL51;Q5IS43	Platelet-activating factor acetylhydrolase IB subunit alpha	PAFAH1B1
24.1296443939209	24.2721061706543	23.8978691101074	24.229097366333	24.020658493042	23.3452758789063	24.1452579498291	24.4303817749023	23.8037586212158	23.8798999786377	23.7874183654785	24.1846771240234	23.7294883728027	24.5475082397461	23.0494728088379	23.8227710723877	24.326379776001	24.3639640808105	23.918327331543	24.4298782348633	23.3483505249023	23.9095249176025				3	3	3	20,4	20,4	20,4	22,919	0	97,24	1862900000	143	P43080	P43080	Guanylyl cyclase-activating protein 1	GUCA1A
29.5822296142578	29.6264305114746	29.7657337188721	29.6269493103027	29.6154098510742	29.5311336517334	29.7448749542236	29.6982231140137	29.5799732208252	29.4841232299805	29.6583728790283	29.5899963378906	29.4711608886719	29.7977447509766	29.5789546966553	29.5340824127197	29.6425743103027	29.6803092956543	29.5574264526367	29.7142868041992	29.7528018951416	29.7362155914307				18	18	18	33,1	33,1	33,1	94,622	0	323,31	91565000000	1452	P43243;P43243-2	P43243	Matrin-3	MATR3
21.7222537994385	22.0714492797852	21.7293357849121	21.6757545471191	21.8708744049072	21.9106712341309	21.6759490966797	22.3107261657715	21.8786010742188	21.2377147674561	22.2379474639893	21.9992427825928	21.5290145874023	21.996603012085	22.2427711486816	21.692928314209	21.7975902557373	22.0118598937988	22.2950191497803	21.7145690917969	21.8536128997803	21.915771484375				6	6	6	12,3	12,3	12,3	104,74	0	12,748	374840000	99	P43246;P43246-2	P43246;P43246-2	DNA mismatch repair protein Msh2	MSH2
25.2147483825684	25.1842765808105	25.3364429473877	25.3126564025879	25.596363067627	25.2818336486816	25.5181770324707	25.414400100708	25.4085006713867	24.9839019775391	25.3651123046875	25.3999099731445	25.2960739135742	25.369701385498	25.3078517913818	25.3437614440918	25.4545249938965	25.4944725036621	25.3883266448975	25.4364337921143	25.3395671844482	25.2672863006592				10	10	10	22,3	22,3	22,3	67,531	0	79,172	4782100000	519	P43304-2;P43304	P43304-2;P43304	Glycerol-3-phosphate dehydrogenase, mitochondrial	GPD2
23.4406509399414	24.4602279663086	23.8818416595459	23.7193794250488	23.6663284301758	23.931583404541	23.0498580932617	23.3805351257324	25.1539421081543	24.9590244293213	26.4508361816406	25.0334091186523	25.1979656219482	24.905179977417	24.1222343444824	25.0141639709473	24.2867469787598	25.016881942749	25.7477340698242	25.701681137085	22.8325023651123	23.7450180053711				4	4	4	26,8	26,8	26,8	23,38	0	237,93	3124400000	210	P43320	P43320	Beta-crystallin B2	CRYBB2
24.3876972198486	24.1949443817139	23.9428653717041	24.4453659057617	24.2898006439209	24.7426643371582	24.484561920166	24.4902191162109	24.2899570465088	24.307373046875	24.2516231536865	24.500171661377	24.3125076293945	24.3811702728271	24.8967170715332	24.499885559082	24.6229362487793	24.5853366851807	24.9225978851318	24.5981693267822	24.9325313568115	24.6305370330811				7	7	4	41,4	41,4	29,3	37,808	0	64,736	2716700000	446	P43367	P43367
22.2636642456055	23.3707752227783	22.8157405853271	22.9369010925293	23.1132888793945	21.9199142456055	NaN	22.4116859436035	23.106029510498	23.383617401123	21.8870296478271	22.8747787475586	22.444149017334	22.6418552398682	22.6848278045654	22.7906894683838	22.5939083099365	22.8174457550049	23.0394058227539	23.3397998809814	23.4063930511475	22.8411731719971				3	3	3	21,5	21,5	21,5	23,239	0	11,466	616530000	68	P43487-2;P43487	P43487-2;P43487	Ran-specific GTPase-activating protein	RANBP1
25.6816425323486	25.6239280700684	24.8423175811768	25.697021484375	25.7148780822754	25.4614086151123	25.5737495422363	25.9041309356689	25.7387943267822	25.2865428924561	25.7436466217041	25.731819152832	25.6435604095459	25.7856521606445	26.1236610412598	25.5519256591797	25.6244583129883	25.4818744659424	25.6240997314453	25.7464542388916	25.8904151916504	25.8411693572998				11	11	11	55,5	55,5	55,5	47,366	0	126,39	5956400000	455	P43686;P43686-2	P43686;P43686-2	26S protease regulatory subunit 6B	PSMC4
23.2632961273193	22.885648727417	22.9306144714355	23.7005138397217	22.8990268707275	23.5003471374512	22.9113998413086	23.2059211730957	22.7855014801025	23.0011959075928	22.8681869506836	23.0891132354736	22.1965560913086	23.374044418335	23.4128570556641	22.0992870330811	23.4523315429688	23.4065246582031	22.7827548980713	22.8370018005371	23.1585693359375	22.5203247070313				3	3	3	22	22	22	22,225	0	42,818	703660000	107	P45973	P45973	Chromobox protein homolog 5	CBX5
27.1786346435547	27.2968597412109	27.0363712310791	27.2966976165771	27.0596485137939	27.4075527191162	27.3767261505127	27.2543334960938	27.0190238952637	27.2178382873535	27.2600345611572	27.2574729919434	27.3968200683594	27.1227874755859	27.3628692626953	27.3151950836182	27.3885612487793	27.1529521942139	27.3840770721436	27.3970775604248	27.4595069885254	27.1667976379395				15	15	14	27,5	27,5	26,3	93,307	0	323,31	17828000000	960	P45974-2;P45974	P45974-2;P45974	Ubiquitin carboxyl-terminal hydrolase 5	USP5
23.1572246551514	22.721019744873	22.7405490875244	23.0594844818115	22.5231971740723	23.2944660186768	23.3050994873047	22.566255569458	22.8372402191162	23.765998840332	23.0969619750977	22.5575065612793	22.2712745666504	23.2055969238281	23.2361030578613	22.8194732666016	23.576868057251	23.4059600830078	23.2414379119873	22.8447265625	22.570291519165	22.9613590240479				4	4	4	12,8	12,8	12,8	44,287	0	91,517	850990000	82	P45985;P45985-2	P45985;P45985-2	Dual specificity mitogen-activated protein kinase kinase 4	MAP2K4
25.5404930114746	25.5854263305664	25.5817947387695	25.6232833862305	25.6890640258789	25.7781028747559	25.6751022338867	25.868860244751	25.5343761444092	25.3674125671387	25.5421676635742	25.6290092468262	25.8239364624023	25.7346115112305	25.6807670593262	25.6478538513184	25.6207237243652	25.4773464202881	25.9013633728027	25.7340240478516	25.6790180206299	25.669506072998				7	7	7	52,5	52,5	52,5	22,905	0	52,479	5866000000	437	P46108-2;P46108	P46108-2;P46108	Adapter molecule crk	CRK
24.3824920654297	24.7773914337158	24.7212600708008	24.5957145690918	24.8211078643799	24.8802547454834	24.8894939422607	24.6407871246338	24.3184566497803	24.4888496398926	24.5923042297363	24.308406829834	24.9858417510986	24.9434108734131	25.1856689453125	24.5101795196533	24.9154968261719	25.1119518280029	24.9538707733154	24.9225044250488	24.8793201446533	24.648588180542				6	6	6	29,4	29,4	29,4	33,777	0	37,055	3326600000	342	P46109	P46109	Crk-like protein	CRKL
32.519229888916	32.6331825256348	32.3626251220703	32.4452247619629	32.4557685852051	32.6121788024902	32.5364799499512	32.7235221862793	32.5165939331055	32.6508598327637	32.567798614502	32.5493392944336	32.0871772766113	32.6142654418945	31.7835159301758	31.9006175994873	32.4950180053711	32.0571365356445	32.3691024780273	32.6772766113281	32.0215187072754	32.4308052062988				17	17	17	59,8	59,8	59,8	42,03	0	323,31	644780000000	3489	P46410;P15104	P46410;P15104	Glutamine synthetase	GLUL
29.3774433135986	29.4291000366211	29.2058715820313	29.4008560180664	29.4301834106445	29.4304618835449	29.4038982391357	29.4262599945068	29.2831192016602	29.2294883728027	29.3004341125488	29.3780479431152	29.0000820159912	29.3614845275879	28.6060047149658	29.0358371734619	29.2970638275146	29.3065929412842	28.8867168426514	29.378173828125	28.9196472167969	29.312126159668				27	27	27	48,7	48,7	48,7	82,593	0	290,12	71739000000	1626	P46459;P46459-2	P46459;P46459-2	Vesicle-fusing ATPase	NSF
22.1777038574219	23.1652584075928	23.234712600708	23.0955600738525	22.778507232666	23.301197052002	22.6470546722412	22.5313682556152	22.8913497924805	23.3489570617676	23.2612228393555	22.7692623138428	23.3494892120361	23.1248874664307	23.1684265136719	23.2550945281982	22.6897201538086	22.9585399627686	23.1019897460938	23.0523204803467	23.0103282928467	23.3245754241943				3	3	3	22,3	22,3	22,3	16,561	0	52,692	727500000	100	P46776	P46776	60S ribosomal protein L27a	RPL27A
24.6253967285156	24.2571239471436	24.4749870300293	24.5421485900879	24.4328651428223	24.7050476074219	24.7663097381592	24.7239151000977	24.6374626159668	24.5726375579834	24.708927154541	23.8848190307617	24.7405700683594	24.875020980835	24.9229927062988	24.7279472351074	24.9203281402588	24.51442527771	24.8945121765137	24.4270114898682	24.6222171783447	24.469202041626				3	3	3	36	36	36	14,558	0	123,86	2985000000	285	Q95276;P46777	Q95276;P46777	60S ribosomal protein L5	RPL5
22.3783073425293	22.2352600097656	22.5071983337402	21.9629364013672	22.417797088623	22.3850708007813	22.2541313171387	22.279426574707	22.1006488800049	22.0450191497803	22.2662525177002	21.9074420928955	22.5966033935547	22.2745094299316	22.3406639099121	22.1964626312256	21.8814296722412	21.5315780639648	22.067195892334	22.0844440460205	22.773307800293	22.2248554229736				4	4	4	27,5	27,5	27,5	18,565	0	7,7551	485880000	100	P49666;P46778	P49666;P46778	60S ribosomal protein L21	RPL21
[truncated: 1,578 more rows]
