# Supplementary material for: Large-Scale Protein Analysis of Experimental Retinal Artery Occlusion
Source: Int J Mol Sci. 2023 Apr 27;24(9):7919. doi: 10.3390/ijms24097919 (PMC10177937; doi:10.3390/ijms24097919)
Supplement: Supplementary file 1 [file ijms-24-07919-s001.zip › Table S3, Data output from MaxQuant.txt]

Protein IDs	Majority protein IDs	Peptide counts (all)	Peptide counts (razor+unique)	Peptide counts (unique)	Protein names	Gene names	Fasta headers	Number of proteins	Peptides	Razor + unique peptides	Unique peptides	Peptides 1d_1G1B1HO_1	Peptides 1d_1G1B1HO_2	Peptides 1d_1G1B1HO_3	Peptides 1d_1G1B1HO_4	Peptides 1d_2G1B1VK_1	Peptides 1d_2G1B1VK_2	Peptides 1d_2G1B1VK_3	Peptides 1d_2G1B1VK_4	Peptides 1d_3G2B2HO_1	Peptides 1d_3G2B2HO_2	Peptides 1d_3G2B2HO_3	Peptides 1d_3G2B2HO_4	Peptides 1d_4G2B2VK_1	Peptides 1d_4G2B2VK_2	Peptides 1d_4G2B2VK_3	Peptides 1d_4G2B2VK_4	Peptides 1d_5G3B3HO_1	Peptides 1d_5G3B3HO_2	Peptides 1d_5G3B3HO_3	Peptides 1d_5G3B3HO_4	Peptides 1d_6G3B3VK_1	Peptides 1d_6G3B3VK_2	Peptides 1d_6G3B3VK_3	Peptides 1d_6G3B3VK_4	Peptides 1d_7G4B4HO_1	Peptides 1d_7G4B4HO_2	Peptides 1d_7G4B4HO_3	Peptides 1d_7G4B4HO_4	Peptides 1d_8G4B4VK_1	Peptides 1d_8G4B4VK_2	Peptides 1d_8G4B4VK_3	Peptides 1d_8G4B4VK_4	Peptides 3d_1G1B1HO_1	Peptides 3d_1G1B1HO_2	Peptides 3d_1G1B1HO_3	Peptides 3d_1G1B1HO_4	Peptides 3d_2G1B1VK_1	Peptides 3d_2G1B1VK_2
A0A024RBG1;Q9NZJ9;Q9NZJ9-2	A0A024RBG1;Q9NZJ9;Q9NZJ9-2	1;1;1	1;1;1	1;1;1	Diphosphoinositol polyphosphate phosphohydrolase 2	NUDT4	sp|A0A024RBG1|NUD4B_HUMAN Diphosphoinositol polyphosphate phosphohydrolase NUDT4B OS=Homo sapiens OX=9606 GN=NUDT4B PE=3 SV=1;sp|Q9NZJ9|NUDT4_HUMAN Diphosphoinositol polyphosphate phosphohydrolase 2 OS=Homo sapiens OX=9606 GN=NUDT4 PE=1 SV=2;sp|Q9NZJ9-2|NU	3	1	1	1	1	1	1	1	0	1	1	1	1	1	1	1	1	1	1	1	1	1	1	1	1	1	1	1	1	1	1	1	1	1	1	1	1	1	1	1	1	1
A2NJV5;A0A0A0MRZ7;A0A075B6S6;A0A075B6S2;A0A075B6P5;A0A087WW87;P06310;P01615;P01614	A2NJV5;A0A0A0MRZ7;A0A075B6S6;A0A075B6S2;A0A075B6P5;A0A087WW87;P06310;P01615;P01614	1;1;1;1;1;1;1;1;1	1;1;1;1;1;1;1;1;1	1;1;1;1;1;1;1;1;1	Ig kappa chain V-II region RPMI 6410;Ig kappa chain V-II region FR;Ig kappa chain V-II region Cum	IGKV A18;IGKV2D-26;IGKV2D-30;IGKV2D-29;IGKV2D-28;IGKV2-40	sp|A2NJV5|KV229_HUMAN Immunoglobulin kappa variable 2-29 OS=Homo sapiens OX=9606 GN=IGKV2-29 PE=3 SV=2;sp|A0A0A0MRZ7|KVD26_HUMAN Immunoglobulin kappa variable 2D-26 OS=Homo sapiens OX=9606 GN=IGKV2D-26 PE=3 SV=1;sp|A0A075B6S6|KVD30_HUMAN Immunoglobulin kap	9	1	1	1	0	1	1	0	0	1	1	0	0	0	0	0	0	1	0	0	0	1	0	0	0	0	0	0	1	0	0	0	0	0	0	0	0	1	0	0	0	1
P0DPI2;A0A0B4J2D5;P0DPI2-2;A0A0B4J2D5-2	P0DPI2;A0A0B4J2D5;P0DPI2-2;A0A0B4J2D5-2	2;2;1;1	2;2;1;1	2;2;1;1			sp|P0DPI2|GAL3A_HUMAN Glutamine amidotransferase-like class 1 domain-containing protein 3A, mitochondrial OS=Homo sapiens OX=9606 GN=GATD3A PE=1 SV=1;sp|A0A0B4J2D5|GAL3B_HUMAN Glutamine amidotransferase-like class 1 domain-containing protein 3B, mitochondr	4	2	2	2	1	1	0	0	1	1	0	1	0	0	0	0	0	0	0	1	0	1	0	1	0	0	1	2	0	0	0	1	1	1	1	1	0	1	0	0	1	0
A0A0C4DH73;A0A0C4DH72;P04432;P01611;P01597	A0A0C4DH73;A0A0C4DH72;P04432;P01611;P01597	1;1;1;1;1	1;1;1;1;1	1;1;1;1;1	Ig kappa chain V-I region Daudi;Ig kappa chain V-I region Wes;Ig kappa chain V-I region DEE	IGKV1-12;IGKV1-6	sp|A0A0C4DH73|KV112_HUMAN Immunoglobulin kappa variable 1-12 OS=Homo sapiens OX=9606 GN=IGKV1-12 PE=3 SV=1;sp|A0A0C4DH72|KV106_HUMAN Immunoglobulin kappa variable 1-6 OS=Homo sapiens OX=9606 GN=IGKV1-6 PE=3 SV=1;sp|P04432|KVD39_HUMAN Immunoglobulin kappa v	5	1	1	1	0	0	1	1	0	1	1	1	0	0	0	0	0	0	0	1	0	0	0	0	0	0	0	0	0	0	1	1	0	0	1	1	0	0	1	0	0	0
A0AVT1;A0AVT1-2;A0AVT1-4;A0AVT1-3	A0AVT1;A0AVT1-2	7;5;2;2	7;5;2;2	7;5;2;2	Ubiquitin-like modifier-activating enzyme 6	UBA6	sp|A0AVT1|UBA6_HUMAN Ubiquitin-like modifier-activating enzyme 6 OS=Homo sapiens OX=9606 GN=UBA6 PE=1 SV=1;sp|A0AVT1-2|UBA6_HUMAN Isoform 2 of Ubiquitin-like modifier-activating enzyme 6 OS=Homo sapiens OX=9606 GN=UBA6	4	7	7	7	0	1	0	0	0	0	0	0	0	1	1	2	1	0	0	0	0	0	0	0	0	0	0	0	0	0	1	1	0	0	1	1	1	1	0	0	0	0
A0MZ66-2;A0MZ66-8;A0MZ66-4;A0MZ66-5;A0MZ66-6;A0MZ66;A0MZ66-3	A0MZ66-2;A0MZ66-8;A0MZ66-4;A0MZ66-5;A0MZ66-6;A0MZ66;A0MZ66-3	1;1;1;1;1;1;1	1;1;1;1;1;1;1	1;1;1;1;1;1;1	Shootin-1	KIAA1598	sp|A0MZ66-2|SHOT1_HUMAN Isoform 2 of Shootin-1 OS=Homo sapiens OX=9606 GN=SHTN1;sp|A0MZ66-8|SHOT1_HUMAN Isoform 8 of Shootin-1 OS=Homo sapiens OX=9606 GN=SHTN1;sp|A0MZ66-4|SHOT1_HUMAN Isoform 4 of Shootin-1 OS=Homo sapiens OX=9606 GN=SHTN1;sp|A0MZ66-5|SHOT	7	1	1	1	1	0	1	0	0	0	0	1	0	0	0	0	1	0	0	0	1	0	1	0	1	1	0	0	0	0	0	0	0	0	0	0	0	0	0	0	0	0
A1E295;P07858	A1E295	6;1	6;1	6;1			sp|A1E295|CATB_PIG Cathepsin B OS=Sus scrofa OX=9823 GN=CTSB PE=1 SV=1	2	6	6	6	3	1	1	2	3	2	1	0	2	2	0	2	2	2	2	1	2	2	2	2	2	2	1	1	3	0	1	3	2	1	2	2	3	2	3	1	3	2
A1L0T0	A1L0T0	4	4	4	Acetolactate synthase-like protein	ILVBL	sp|A1L0T0|HACL2_HUMAN 2-hydroxyacyl-CoA lyase 2 OS=Homo sapiens OX=9606 GN=ILVBL PE=1 SV=2	1	4	4	4	1	0	1	0	1	0	1	0	0	1	2	0	1	0	1	1	0	0	1	0	0	0	0	1	0	0	0	0	1	0	0	0	2	1	0	0	1	1
A1XQR7	A1XQR7	3	3	3			sp|A1XQR7|MIC13_PIG MICOS complex subunit MIC13 OS=Sus scrofa OX=9823 GN=MICOS13 PE=3 SV=1	1	3	3	3	1	0	1	1	1	0	1	1	1	0	1	1	1	1	0	1	1	1	0	1	1	2	0	1	1	0	1	1	0	0	2	1	0	2	2	0	1	1
A1XQR9;P62304	A1XQR9;P62304	2;2	2;2	2;2	Small nuclear ribonucleoprotein E	SNRPE	sp|A1XQR9|RUXE_PIG Small nuclear ribonucleoprotein E OS=Sus scrofa OX=9823 GN=SNRPE PE=3 SV=1;sp|P62304|RUXE_HUMAN Small nuclear ribonucleoprotein E OS=Homo sapiens OX=9606 GN=SNRPE PE=1 SV=1	2	2	2	2	0	1	1	1	1	2	1	1	2	1	2	2	1	2	1	1	0	2	1	1	0	2	1	1	0	2	1	1	1	1	1	1	0	0	1	1	0	1
A1XQS5;P05496;Q06055;P48201;Q06055-3;Q06055-2	A1XQS5;P05496;Q06055;P48201;Q06055-3;Q06055-2	1;1;1;1;1;1	1;1;1;1;1;1	1;1;1;1;1;1	ATP synthase F(0) complex subunit C1, mitochondrial;ATP synthase F(0) complex subunit C2, mitochondrial;ATP synthase F(0) complex subunit C3, mitochondrial	ATP5G1;ATP5G2;ATP5G3	sp|A1XQS5|AT5G1_PIG ATP synthase F(0) complex subunit C1, mitochondrial OS=Sus scrofa OX=9823 GN=ATP5MC1 PE=2 SV=1;sp|P05496|AT5G1_HUMAN ATP synthase F(0) complex subunit C1, mitochondrial OS=Homo sapiens OX=9606 GN=ATP5MC1 PE=1 SV=2;sp|Q06055|AT5G2_HUMAN	6	1	1	1	1	1	1	0	1	1	0	1	1	1	1	0	1	1	1	0	1	1	1	0	1	1	0	1	1	1	1	1	1	1	1	1	1	1	1	1	1	1
A1XQT2	A1XQT2	2	2	2			sp|A1XQT2|COX6C_PIG Cytochrome c oxidase subunit 6C OS=Sus scrofa OX=9823 GN=COX6C PE=3 SV=1	1	2	2	2	0	0	1	1	0	0	0	1	0	1	1	0	0	0	1	0	0	0	1	0	0	0	0	0	0	0	0	0	0	0	1	0	0	0	0	1	0	0
A1XQU1;Q99436;Q99436-2	A1XQU1	5;2;1	5;2;1	5;2;1			sp|A1XQU1|PSB7_PIG Proteasome subunit beta type-7 OS=Sus scrofa OX=9823 GN=PSMB7 PE=2 SV=2	3	5	5	5	2	2	2	0	1	2	2	1	2	2	2	1	2	2	2	1	1	1	0	1	1	2	1	0	1	1	0	2	3	1	1	2	3	3	3	0	2	2
A1XQU3;P50914	A1XQU3;P50914	3;3	3;3	3;3	60S ribosomal protein L14	RPL14	sp|A1XQU3|RL14_PIG 60S ribosomal protein L14 OS=Sus scrofa OX=9823 GN=RPL14 PE=1 SV=1;sp|P50914|RL14_HUMAN 60S ribosomal protein L14 OS=Homo sapiens OX=9606 GN=RPL14 PE=1 SV=4	2	3	3	3	1	2	2	2	2	1	2	2	2	2	2	2	2	1	1	2	2	1	2	2	2	1	2	2	2	1	2	2	2	2	2	2	2	2	2	1	2	2
A1XQU5;P61353	A1XQU5;P61353	5;5	5;5	5;5	60S ribosomal protein L27	RPL27	sp|A1XQU5|RL27_PIG 60S ribosomal protein L27 OS=Sus scrofa OX=9823 GN=RPL27 PE=1 SV=1;sp|P61353|RL27_HUMAN 60S ribosomal protein L27 OS=Homo sapiens OX=9606 GN=RPL27 PE=1 SV=2	2	5	5	5	2	2	3	4	2	2	3	3	2	3	3	3	2	2	3	2	2	2	3	3	2	2	3	2	2	2	4	3	3	3	3	3	3	1	2	3	3	1
A1XQU9;P60866;P60866-2	A1XQU9;P60866;P60866-2	2;2;2	2;2;2	2;2;2	40S ribosomal protein S20	RPS20	sp|A1XQU9|RS20_PIG 40S ribosomal protein S20 OS=Sus scrofa OX=9823 GN=RPS20 PE=1 SV=1;sp|P60866|RS20_HUMAN 40S ribosomal protein S20 OS=Homo sapiens OX=9606 GN=RPS20 PE=1 SV=1;sp|P60866-2|RS20_HUMAN Isoform 2 of 40S ribosomal protein S20 OS=Homo sapiens OX	3	2	2	2	1	1	1	1	1	1	1	2	1	1	1	2	1	1	0	1	1	1	1	1	1	1	1	2	1	1	1	1	1	1	1	1	1	1	2	1	1	1
A1Y2K1;P06241;P06241-3;P06241-2	A1Y2K1;P06241;P06241-3;P06241-2	6;6;5;5	4;4;3;3	4;4;3;3	Tyrosine-protein kinase Fyn	FYN	sp|A1Y2K1|FYN_PIG Tyrosine-protein kinase Fyn OS=Sus scrofa OX=9823 GN=FYN PE=2 SV=2;sp|P06241|FYN_HUMAN Tyrosine-protein kinase Fyn OS=Homo sapiens OX=9606 GN=FYN PE=1 SV=3;sp|P06241-3|FYN_HUMAN Isoform 3 of Tyrosine-protein kinase Fyn OS=Homo sapiens OX=	4	6	4	4	1	1	1	1	0	0	0	0	0	0	0	1	1	2	1	2	2	1	1	1	0	1	0	1	1	0	1	0	2	1	1	1	2	2	1	1	0	2
A1YIZ1;Q99611	A1YIZ1;Q99611	4;2	4;2	4;2	Selenide, water dikinase 2	SEPHS2	sp|A1YIZ1|SPS2_PIG Selenide, water dikinase 2 OS=Sus scrofa OX=9823 GN=SEPHS2 PE=2 SV=2;sp|Q99611|SPS2_HUMAN Selenide, water dikinase 2 OS=Homo sapiens OX=9606 GN=SEPHS2 PE=1 SV=3	2	4	4	4	1	2	0	2	1	1	0	1	2	0	1	2	3	2	1	1	2	2	0	2	2	2	2	0	2	1	1	2	2	2	2	3	1	2	1	0	2	1
A1Z623;O60613	A1Z623;O60613	2;2	2;2	2;2	15 kDa selenoprotein	SEP15	sp|A1Z623|SEP15_PIG Selenoprotein F OS=Sus scrofa OX=9823 GN=SELENOF PE=2 SV=2;sp|O60613|SEP15_HUMAN Selenoprotein F OS=Homo sapiens OX=9606 GN=SELENOF PE=1 SV=4	2	2	2	2	0	0	0	0	0	1	0	0	0	2	1	0	0	0	0	0	0	1	1	0	0	1	0	0	0	0	0	1	0	0	1	1	0	0	0	0	0	0
A2A3N6	A2A3N6	3	2	1	Putative PIP5K1A and PSMD4-like protein	PIPSL	sp|A2A3N6|PIPSL_HUMAN Putative PIP5K1A and PSMD4-like protein OS=Homo sapiens OX=9606 GN=PIPSL PE=5 SV=1	1	3	2	1	0	0	0	0	0	0	0	1	1	1	0	0	0	0	0	0	0	1	1	0	0	0	0	0	1	0	0	0	0	0	0	0	0	0	0	0	0	0
A2ICN5-3;A2ICN5-2;A2ICN5	A2ICN5-3;A2ICN5-2;A2ICN5	1;1;1	1;1;1	1;1;1			sp|A2ICN5-3|MEF2A_PIG Isoform 3 of Myocyte-specific enhancer factor 2A OS=Sus scrofa OX=9823 GN=MEF2A;sp|A2ICN5-2|MEF2A_PIG Isoform 2 of Myocyte-specific enhancer factor 2A OS=Sus scrofa OX=9823 GN=MEF2A;sp|A2ICN5|MEF2A_PIG Myocyte-specific enhancer factor	3	1	1	1	0	0	0	0	0	0	0	0	0	0	0	0	0	0	0	0	0	0	0	0	0	0	0	0	0	0	0	0	0	0	0	0	0	1	0	0	0	0
A2RRP1-2;A2RRP1	A2RRP1-2;A2RRP1	9;9	9;9	9;9	Neuroblastoma-amplified sequence	NBAS	sp|A2RRP1-2|NBAS_HUMAN Isoform 2 of Neuroblastoma-amplified sequence OS=Homo sapiens OX=9606 GN=NBAS;sp|A2RRP1|NBAS_HUMAN Neuroblastoma-amplified sequence OS=Homo sapiens OX=9606 GN=NBAS PE=1 SV=2	2	9	9	9	3	1	0	0	2	3	0	0	3	0	2	2	2	3	0	1	3	1	0	0	7	2	1	2	4	2	2	1	3	2	1	1	2	1	1	0	2	1
A2RTX5-2;A2RTX5	A2RTX5-2;A2RTX5	3;3	2;2	2;2	Probable threonine--tRNA ligase 2, cytoplasmic	TARSL2	sp|A2RTX5-2|SYTC2_HUMAN Isoform 2 of Threonine--tRNA ligase 2, cytoplasmic OS=Homo sapiens OX=9606 GN=TARS3;sp|A2RTX5|SYTC2_HUMAN Threonine--tRNA ligase 2, cytoplasmic OS=Homo sapiens OX=9606 GN=TARS3 PE=1 SV=1	2	3	2	2	0	1	1	2	1	1	2	0	1	1	1	1	1	0	2	0	1	1	2	1	1	0	2	2	1	1	2	2	1	1	2	2	0	1	1	2	1	1
A2RU67	A2RU67	1	1	1	Uncharacterized protein KIAA1467	KIAA1467	sp|A2RU67|F234B_HUMAN Protein FAM234B OS=Homo sapiens OX=9606 GN=FAM234B PE=1 SV=1	1	1	1	1	0	0	0	0	0	0	0	0	0	1	0	0	0	0	1	0	0	0	1	0	0	0	1	1	0	0	1	0	0	0	0	1	0	0	0	0	0	0
A2TLM1;P49247	A2TLM1;P49247	1;1	1;1	1;1	Ribose-5-phosphate isomerase	RPIA	sp|A2TLM1|RPIA_PIG Ribose-5-phosphate isomerase OS=Sus scrofa OX=9823 GN=RPIA PE=2 SV=1;sp|P49247|RPIA_HUMAN Ribose-5-phosphate isomerase OS=Homo sapiens OX=9606 GN=RPIA PE=1 SV=3	2	1	1	1	0	0	0	0	0	0	0	0	0	0	0	0	0	0	0	0	0	0	0	0	0	0	0	0	0	0	0	0	0	0	0	0	0	0	0	0	0	0
A3KMH1-2;A3KMH1-3;A3KMH1	A3KMH1-2;A3KMH1-3;A3KMH1	4;4;4	4;4;4	4;4;4	von Willebrand factor A domain-containing protein 8	VWA8	sp|A3KMH1-2|VWA8_HUMAN Isoform 2 of von Willebrand factor A domain-containing protein 8 OS=Homo sapiens OX=9606 GN=VWA8;sp|A3KMH1-3|VWA8_HUMAN Isoform 3 of von Willebrand factor A domain-containing protein 8 OS=Homo sapiens OX=9606 GN=VWA8;sp|A3KMH1|VWA8_H	3	4	4	4	0	1	0	0	0	1	0	0	0	0	0	0	1	0	1	1	0	0	1	1	1	0	0	0	0	1	0	0	0	0	1	1	0	1	1	1	0	0
A4D1E9	A4D1E9	1	1	1	GTP-binding protein 10	GTPBP10	sp|A4D1E9|GTPBA_HUMAN GTP-binding protein 10 OS=Homo sapiens OX=9606 GN=GTPBP10 PE=1 SV=1	1	1	1	1	0	1	0	0	0	0	0	0	0	0	0	0	0	0	0	0	0	0	0	0	0	0	0	0	0	0	0	0	1	0	0	0	1	1	0	0	1	1
A4D1S0-2	A4D1S0-2	1	1	1			sp|A4D1S0-2|KLRG2_HUMAN Isoform 2 of Killer cell lectin-like receptor subfamily G member 2 OS=Homo sapiens OX=9606 GN=KLRG2	1	1	1	1	0	0	1	1	0	0	1	0	0	0	0	0	0	0	1	0	0	1	0	0	0	0	0	0	0	0	0	1	0	0	0	0	0	0	0	0	0	0
A4Z6H0;Q8N142;Q8N142-2	A4Z6H0;Q8N142	8;4;3	8;4;3	8;4;3	Adenylosuccinate synthetase isozyme 1	ADSSL1	sp|A4Z6H0|PURA1_PIG Adenylosuccinate synthetase isozyme 1 OS=Sus scrofa OX=9823 GN=ADSS1 PE=2 SV=1;sp|Q8N142|PURA1_HUMAN Adenylosuccinate synthetase isozyme 1 OS=Homo sapiens OX=9606 GN=ADSS1 PE=1 SV=1	3	8	8	8	2	2	4	3	3	4	3	3	3	2	4	3	2	3	3	3	3	3	3	3	4	2	2	3	4	4	4	3	3	4	5	5	2	3	5	5	2	6
A4Z6H1;P30520	A4Z6H1;P30520	6;6	6;6	6;6	Adenylosuccinate synthetase isozyme 2	ADSS	sp|A4Z6H1|PURA2_PIG Adenylosuccinate synthetase isozyme 2 OS=Sus scrofa OX=9823 GN=ADSS2 PE=2 SV=1;sp|P30520|PURA2_HUMAN Adenylosuccinate synthetase isozyme 2 OS=Homo sapiens OX=9606 GN=ADSS2 PE=1 SV=3	2	6	6	6	4	2	2	2	3	3	2	2	2	1	2	0	4	1	2	3	4	2	1	2	3	1	3	3	3	1	3	2	3	3	3	4	6	4	3	1	4	3
A5A761;Q9H9B4	A5A761;Q9H9B4	11;9	11;9	10;8	Sideroflexin-1	SFXN1	sp|A5A761|SFXN1_PIG Sideroflexin-1 OS=Sus scrofa OX=9823 GN=SFXN1 PE=2 SV=1;sp|Q9H9B4|SFXN1_HUMAN Sideroflexin-1 OS=Homo sapiens OX=9606 GN=SFXN1 PE=1 SV=4	2	11	11	10	5	5	6	4	5	5	7	5	3	3	5	5	5	5	7	5	6	5	7	7	5	5	5	3	4	3	7	7	5	6	7	6	6	5	6	8	6	6
A5A779;Q92696	A5A779;Q92696	4;2	4;2	4;2	Geranylgeranyl transferase type-2 subunit alpha	RABGGTA	sp|A5A779|PGTA_PIG Geranylgeranyl transferase type-2 subunit alpha OS=Sus scrofa OX=9823 GN=RABGGTA PE=2 SV=1;sp|Q92696|PGTA_HUMAN Geranylgeranyl transferase type-2 subunit alpha OS=Homo sapiens OX=9606 GN=RABGGTA PE=1 SV=2	2	4	4	4	1	1	0	1	2	1	1	1	2	1	2	1	1	1	1	1	2	1	1	1	1	1	1	1	1	1	1	1	1	1	1	1	2	1	2	1	1	1
A5D9M6;A5D9M6-2;P46379-2;P46379;P46379-3;P46379-4;P46379-5	A5D9M6;A5D9M6-2	14;13;6;6;6;5;5	14;13;6;6;6;5;5	14;13;6;6;6;5;5			sp|A5D9M6|BAG6_PIG Large proline-rich protein BAG6 OS=Sus scrofa OX=9823 GN=BAG6 PE=1 SV=1;sp|A5D9M6-2|BAG6_PIG Isoform 2 of Large proline-rich protein BAG6 OS=Sus scrofa OX=9823 GN=BAG6	7	14	14	14	8	4	4	7	10	6	7	8	7	7	4	4	8	9	8	7	9	4	10	8	9	6	7	9	10	5	8	8	10	4	11	9	6	8	4	8	9	5
A5GFN6;P78406	A5GFN6;P78406	7;5	7;5	7;5	mRNA export factor	RAE1	sp|A5GFN6|RAEL1_PIG mRNA export factor OS=Sus scrofa OX=9823 GN=RAE1 PE=3 SV=1;sp|P78406|RAE1L_HUMAN mRNA export factor OS=Homo sapiens OX=9606 GN=RAE1 PE=1 SV=1	2	7	7	7	0	3	2	2	2	2	3	3	2	3	3	2	2	2	2	2	1	1	3	3	0	1	3	4	2	1	2	4	2	0	3	3	3	3	1	2	2	2
A5GFQ5	A5GFQ5	1	1	1			sp|A5GFQ5|CNPY3_PIG Protein canopy homolog 3 OS=Sus scrofa OX=9823 GN=CNPY3 PE=3 SV=1	1	1	1	1	1	0	0	1	0	0	0	0	0	0	0	0	0	1	0	0	0	1	0	0	1	1	1	0	1	0	0	0	0	0	0	0	1	0	0	1	1	0
A5GFS8;O95292;O95292-2	A5GFS8;O95292;O95292-2	5;4;3	5;4;3	4;3;2	Vesicle-associated membrane protein-associated protein B/C	VAPB	sp|A5GFS8|VAPB_PIG Vesicle-associated membrane protein-associated protein B OS=Sus scrofa OX=9823 GN=VAPB PE=3 SV=1;sp|O95292|VAPB_HUMAN Vesicle-associated membrane protein-associated protein B/C OS=Homo sapiens OX=9606 GN=VAPB PE=1 SV=3;sp|O95292-2|VAPB_H	3	5	5	4	3	3	3	3	3	4	4	4	4	3	4	4	3	4	4	4	4	4	4	3	4	4	4	3	4	2	4	4	4	4	4	4	3	4	3	3	4	4
A5GFW7;Q9BY42	A5GFW7;Q9BY42	1;1	1;1	1;1	Protein RTF2 homolog	RTFDC1	sp|A5GFW7|RTF2_PIG Replication termination factor 2 OS=Sus scrofa OX=9823 GN=RTF2 PE=3 SV=1;sp|Q9BY42|RTF2_HUMAN Replication termination factor 2 OS=Homo sapiens OX=9606 GN=RTF2 PE=1 SV=3	2	1	1	1	0	0	0	0	1	0	1	0	1	0	0	0	1	0	0	0	1	0	0	0	0	0	0	0	1	0	1	0	1	0	1	1	1	1	1	0	1	0
A5GFY8;O43175	A5GFY8;O43175	15;8	15;8	15;8	D-3-phosphoglycerate dehydrogenase	PHGDH	sp|A5GFY8|SERA_PIG D-3-phosphoglycerate dehydrogenase OS=Sus scrofa OX=9823 GN=PHGDH PE=3 SV=1;sp|O43175|SERA_HUMAN D-3-phosphoglycerate dehydrogenase OS=Homo sapiens OX=9606 GN=PHGDH PE=1 SV=4	2	15	15	15	7	7	9	9	6	7	9	10	7	9	9	9	5	8	7	7	5	6	7	10	6	7	6	9	7	7	8	11	7	7	8	10	7	6	7	8	8	9
A5GFZ5;O60762	A5GFZ5;O60762	4;4	4;4	4;4	Dolichol-phosphate mannosyltransferase subunit 1	DPM1	sp|A5GFZ5|DPM1_PIG Dolichol-phosphate mannosyltransferase subunit 1 OS=Sus scrofa OX=9823 GN=DPM1 PE=3 SV=1;sp|O60762|DPM1_HUMAN Dolichol-phosphate mannosyltransferase subunit 1 OS=Homo sapiens OX=9606 GN=DPM1 PE=1 SV=1	2	4	4	4	1	0	0	1	1	1	1	3	1	3	2	2	0	1	1	2	1	0	4	3	1	1	2	1	1	2	2	3	2	1	2	3	1	2	1	1	1	2
A5YKK6;A5YKK6-2;A5YKK6-3;A5YKK6-4	A5YKK6;A5YKK6-2;A5YKK6-3;A5YKK6-4	19;18;16;11	19;18;16;11	19;18;16;11	CCR4-NOT transcription complex subunit 1	CNOT1	sp|A5YKK6|CNOT1_HUMAN CCR4-NOT transcription complex subunit 1 OS=Homo sapiens OX=9606 GN=CNOT1 PE=1 SV=2;sp|A5YKK6-2|CNOT1_HUMAN Isoform 2 of CCR4-NOT transcription complex subunit 1 OS=Homo sapiens OX=9606 GN=CNOT1;sp|A5YKK6-3|CNOT1_HUMAN Isoform 3 of CC	4	19	19	19	3	5	3	1	4	6	3	5	3	3	1	2	3	4	3	2	3	3	5	3	3	5	1	3	5	1	4	4	5	4	5	6	6	4	2	1	4	3
A6M931;P38919	A6M931;P38919	10;10	8;8	8;8	Eukaryotic initiation factor 4A-III;Eukaryotic initiation factor 4A-III, N-terminally processed	EIF4A3	sp|A6M931|IF4A3_PIG Eukaryotic initiation factor 4A-III OS=Sus scrofa OX=9823 GN=EIF4A3 PE=2 SV=1;sp|P38919|IF4A3_HUMAN Eukaryotic initiation factor 4A-III OS=Homo sapiens OX=9606 GN=EIF4A3 PE=1 SV=4	2	10	8	8	5	4	3	3	4	3	2	3	5	3	3	2	5	3	3	4	5	5	3	2	4	3	3	3	5	3	4	5	4	2	3	4	5	3	4	4	3	5
Q9GZQ8;A6NCE7	Q9GZQ8;A6NCE7	2;2	1;1	1;1	Microtubule-associated proteins 1A/1B light chain 3B;Microtubule-associated proteins 1A/1B light chain 3 beta 2	MAP1LC3B;MAP1LC3B2	sp|Q9GZQ8|MLP3B_HUMAN Microtubule-associated proteins 1A/1B light chain 3B OS=Homo sapiens OX=9606 GN=MAP1LC3B PE=1 SV=3;sp|A6NCE7|MP3B2_HUMAN Microtubule-associated proteins 1A/1B light chain 3 beta 2 OS=Homo sapiens OX=9606 GN=MAP1LC3B2 PE=2 SV=1	2	2	1	1	1	1	1	1	1	1	2	2	1	2	1	2	1	1	0	2	1	2	2	2	1	1	1	2	2	1	1	2	1	1	2	2	1	1	1	2	1	1
A6ND91	A6ND91	1	1	1	Putative L-aspartate dehydrogenase	ASPDH	sp|A6ND91|ASPD_HUMAN Putative L-aspartate dehydrogenase OS=Homo sapiens OX=9606 GN=ASPDH PE=1 SV=2	1	1	1	1	1	1	0	0	0	1	0	0	0	0	0	0	1	0	0	1	0	0	0	0	0	0	0	0	0	1	0	1	0	0	1	1	0	1	1	0	1	0
A6NDA9;A6NDA9-2	A6NDA9;A6NDA9-2	1;1	1;1	1;1	Leucine-rich repeat, immunoglobulin-like domain and transmembrane domain-containing protein 2	LRIT2	sp|A6NDA9|LRIT2_HUMAN Leucine-rich repeat, immunoglobulin-like domain and transmembrane domain-containing protein 2 OS=Homo sapiens OX=9606 GN=LRIT2 PE=2 SV=1;sp|A6NDA9-2|LRIT2_HUMAN Isoform 2 of Leucine-rich repeat, immunoglobulin-like domain and transmem	2	1	1	1	0	1	0	0	0	0	0	0	0	0	0	0	0	0	0	0	0	0	1	1	0	0	1	1	0	0	1	1	1	0	0	0	0	0	1	0	0	0
A6NDG6	A6NDG6	3	3	3	Phosphoglycolate phosphatase	PGP	sp|A6NDG6|PGP_HUMAN Glycerol-3-phosphate phosphatase OS=Homo sapiens OX=9606 GN=PGP PE=1 SV=1	1	3	3	3	3	2	2	2	2	2	2	1	2	2	1	2	2	3	2	1	2	2	1	2	2	2	1	1	3	2	1	2	2	2	2	2	2	2	2	1	3	2
A6NDU8	A6NDU8	4	4	4	UPF0600 protein C5orf51	C5orf51	sp|A6NDU8|CE051_HUMAN UPF0600 protein C5orf51 OS=Homo sapiens OX=9606 GN=C5orf51 PE=1 SV=1	1	4	4	4	1	0	1	1	0	0	0	0	1	1	0	0	1	0	0	0	1	1	2	0	1	2	1	0	0	2	1	0	2	0	2	1	1	2	1	0	1	1
A6NE02	A6NE02	4	4	4	BTB/POZ domain-containing protein 17	BTBD17	sp|A6NE02|BTBDH_HUMAN BTB/POZ domain-containing protein 17 OS=Homo sapiens OX=9606 GN=BTBD17 PE=3 SV=1	1	4	4	4	2	2	2	2	2	1	2	1	2	2	2	0	2	1	2	2	3	1	2	2	2	1	2	2	2	1	2	2	2	2	2	2	2	1	2	3	2	2
A6NGN9	A6NGN9	2	2	2	IgLON family member 5	IGLON5	sp|A6NGN9|IGLO5_HUMAN IgLON family member 5 OS=Homo sapiens OX=9606 GN=IGLON5 PE=1 SV=4	1	2	2	2	1	1	1	1	1	1	1	1	2	2	1	1	1	2	2	1	1	1	1	1	1	2	1	1	1	1	1	1	1	2	2	1	1	1	1	1	2	2
A6NHL2-2;A6NHL2	A6NHL2-2;A6NHL2	5;5	1;1	1;1	Tubulin alpha chain-like 3	TUBAL3	sp|A6NHL2-2|TBAL3_HUMAN Isoform 2 of Tubulin alpha chain-like 3 OS=Homo sapiens OX=9606 GN=TUBAL3;sp|A6NHL2|TBAL3_HUMAN Tubulin alpha chain-like 3 OS=Homo sapiens OX=9606 GN=TUBAL3 PE=1 SV=2	2	5	1	1	3	3	3	3	3	3	3	3	3	3	3	3	3	3	2	3	3	3	4	3	3	3	3	3	3	3	3	4	4	4	4	4	4	4	4	4	5	5
A6NHQ2	A6NHQ2	5	4	4	rRNA/tRNA 2-O-methyltransferase fibrillarin-like protein 1	FBLL1	sp|A6NHQ2|FBLL1_HUMAN rRNA/tRNA 2-O-methyltransferase fibrillarin-like protein 1 OS=Homo sapiens OX=9606 GN=FBLL1 PE=3 SV=2	1	5	4	4	2	2	2	3	2	4	1	2	3	2	1	3	1	0	2	1	2	4	1	2	3	3	1	1	3	1	1	3	3	3	3	3	2	2	2	3	1	3
A6NHR9;A6NHR9-2;A6NHR9-3	A6NHR9;A6NHR9-2	9;9;3	9;9;3	9;9;3	Structural maintenance of chromosomes flexible hinge domain-containing protein 1	SMCHD1	sp|A6NHR9|SMHD1_HUMAN Structural maintenance of chromosomes flexible hinge domain-containing protein 1 OS=Homo sapiens OX=9606 GN=SMCHD1 PE=1 SV=2;sp|A6NHR9-2|SMHD1_HUMAN Isoform 2 of Structural maintenance of chromosomes flexible hinge domain-containing p	3	9	9	9	2	1	2	3	2	1	2	1	2	3	0	1	4	2	2	3	2	1	1	1	1	2	2	2	3	1	2	2	1	4	3	4	2	2	2	2	1	2
A6NHX0	A6NHX0	4	4	4	GATS-like protein 2	GATSL2	sp|A6NHX0|CAST2_HUMAN Cytosolic arginine sensor for mTORC1 subunit 2 OS=Homo sapiens OX=9606 GN=CASTOR2 PE=1 SV=3	1	4	4	4	1	0	1	0	0	0	0	0	1	0	0	0	0	0	0	0	0	1	0	0	0	0	0	0	0	0	1	1	0	0	1	0	1	1	0	0	0	1
A7KAX9;A7KAX9-2;A7KAX9-3	A7KAX9;A7KAX9-2	3;2;1	3;2;1	3;2;1	Rho GTPase-activating protein 32	ARHGAP32	sp|A7KAX9|RHG32_HUMAN Rho GTPase-activating protein 32 OS=Homo sapiens OX=9606 GN=ARHGAP32 PE=1 SV=1;sp|A7KAX9-2|RHG32_HUMAN Isoform 2 of Rho GTPase-activating protein 32 OS=Homo sapiens OX=9606 GN=ARHGAP32	3	3	3	3	1	0	0	0	2	0	0	0	0	0	0	0	1	0	0	0	1	0	0	0	1	0	0	0	1	0	0	0	0	0	0	0	0	0	0	0	1	1
A7TX81;Q7L5N1	A7TX81;Q7L5N1	7;6	7;6	7;6	COP9 signalosome complex subunit 6	COPS6	sp|A7TX81|CSN6_PIG COP9 signalosome complex subunit 6 OS=Sus scrofa OX=9823 GN=COPS6 PE=2 SV=1;sp|Q7L5N1|CSN6_HUMAN COP9 signalosome complex subunit 6 OS=Homo sapiens OX=9606 GN=COPS6 PE=1 SV=1	2	7	7	7	4	4	2	3	3	0	2	4	4	5	4	3	4	3	0	5	4	2	3	3	3	3	3	5	4	2	2	5	1	1	5	5	2	5	0	2	2	3
A7VK00	A7VK00	9	8	8			sp|A7VK00|MX2_PIG Interferon-induced GTP-binding protein Mx2 OS=Sus scrofa OX=9823 GN=MX2 PE=2 SV=1	1	9	8	8	3	1	0	1	2	1	1	1	1	1	1	1	2	1	1	1	2	1	0	2	1	1	1	0	2	0	1	1	3	1	0	3	5	2	2	2	3	2
A7Y521;Q9BT78;Q9BT78-2	A7Y521;Q9BT78;Q9BT78-2	11;11;9	11;11;9	11;11;9	COP9 signalosome complex subunit 4	COPS4	sp|A7Y521|CSN4_PIG COP9 signalosome complex subunit 4 OS=Sus scrofa OX=9823 GN=COPS4 PE=2 SV=1;sp|Q9BT78|CSN4_HUMAN COP9 signalosome complex subunit 4 OS=Homo sapiens OX=9606 GN=COPS4 PE=1 SV=1;sp|Q9BT78-2|CSN4_HUMAN Isoform 2 of COP9 signalosome complex s	3	11	11	11	4	4	5	5	6	5	5	5	5	6	4	2	5	6	3	3	6	5	5	5	5	5	6	5	5	5	5	5	6	4	7	7	5	4	7	6	6	5
A8MT19;Q8IUC4-2;Q8IUC4	A8MT19;Q8IUC4-2;Q8IUC4	3;2;2	3;2;2	3;2;2	Putative rhophilin-2-like protein RHPN2P1;Rhophilin-2	RHPN2P1;RHPN2	sp|A8MT19|RHN2P_HUMAN Putative rhophilin-2-like protein RHPN2P1 OS=Homo sapiens OX=9606 GN=RHPN2P1 PE=5 SV=2;sp|Q8IUC4-2|RHPN2_HUMAN Isoform 2 of Rhophilin-2 OS=Homo sapiens OX=9606 GN=RHPN2;sp|Q8IUC4|RHPN2_HUMAN Rhophilin-2 OS=Homo sapiens OX=9606 GN=RHPN	3	3	3	3	0	2	2	1	1	2	2	1	2	1	3	1	1	3	1	1	1	2	0	2	2	1	1	2	1	2	2	2	2	2	2	3	2	2	2	1	3	2
A8MVW0	A8MVW0	3	3	3	Protein FAM171A2	FAM171A2	sp|A8MVW0|F1712_HUMAN Protein FAM171A2 OS=Homo sapiens OX=9606 GN=FAM171A2 PE=1 SV=1	1	3	3	3	1	0	0	0	0	0	1	0	0	0	0	0	1	0	0	0	0	0	0	0	0	0	0	0	1	0	1	0	0	1	0	0	1	0	0	0	0	0
P62308;A8MWD9	P62308;A8MWD9	3;3	3;3	3;3	Small nuclear ribonucleoprotein G;Putative small nuclear ribonucleoprotein G-like protein 15	SNRPG;SNRPGP15	sp|P62308|RUXG_HUMAN Small nuclear ribonucleoprotein G OS=Homo sapiens OX=9606 GN=SNRPG PE=1 SV=1;sp|A8MWD9|RUXGL_HUMAN Putative small nuclear ribonucleoprotein G-like protein 15 OS=Homo sapiens OX=9606 GN=SNRPGP15 PE=5 SV=2	2	3	3	3	0	1	1	1	1	1	1	2	1	1	1	1	1	1	1	1	1	1	1	2	1	1	1	2	1	1	1	1	1	1	1	1	1	1	1	2	1	1
A8MWY0;A8MWY0-2;A8MWY0-3	A8MWY0;A8MWY0-2;A8MWY0-3	5;3;3	5;3;3	5;3;3	UPF0577 protein KIAA1324-like	KIAA1324L	sp|A8MWY0|ELAP2_HUMAN Endosome/lysosome-associated apoptosis and autophagy regulator family member 2 OS=Homo sapiens OX=9606 GN=ELAPOR2 PE=1 SV=2;sp|A8MWY0-2|ELAP2_HUMAN Isoform 2 of Endosome/lysosome-associated apoptosis and autophagy regulator family mem	3	5	5	5	0	1	1	0	2	2	1	1	1	3	1	0	2	2	2	0	2	2	1	0	2	2	0	0	2	1	1	1	2	1	1	2	0	1	2	0	0	1
A8MY62	A8MY62	2	2	2	Putative beta-lactamase-like 1	LACTBL1	sp|A8MY62|BLML_HUMAN Putative beta-lactamase-like 1 OS=Homo sapiens OX=9606 GN=LACTBL1 PE=2 SV=2	1	2	2	2	1	0	0	0	0	0	0	1	1	0	0	0	1	1	0	0	0	0	0	1	1	0	0	0	1	1	0	1	1	0	0	0	0	1	0	0	1	1
A9CQL8	A9CQL8	3	3	3			sp|A9CQL8|PXL2B_PIG Prostamide/prostaglandin F synthase OS=Sus scrofa OX=9823 GN=PRXL2B PE=1 SV=1	1	3	3	3	0	1	1	0	1	0	0	1	1	0	1	1	0	0	0	0	0	0	0	1	0	1	1	0	0	0	0	0	0	0	0	0	1	0	0	0	0	0
A9QT41;Q9Y6K9;Q9Y6K9-2;Q9Y6K9-3	A9QT41;Q9Y6K9;Q9Y6K9-2	3;2;2;1	3;2;2;1	3;2;2;1	NF-kappa-B essential modulator	IKBKG	sp|A9QT41|NEMO_PIG NF-kappa-B essential modulator OS=Sus scrofa OX=9823 GN=IKBKG PE=1 SV=1;sp|Q9Y6K9|NEMO_HUMAN NF-kappa-B essential modulator OS=Homo sapiens OX=9606 GN=IKBKG PE=1 SV=2;sp|Q9Y6K9-2|NEMO_HUMAN Isoform 2 of NF-kappa-B essential modulator OS=	4	3	3	3	0	0	0	0	0	0	0	0	0	1	1	0	0	0	0	0	0	0	1	1	0	0	0	1	0	0	1	0	0	0	0	0	1	0	0	0	0	0
A9YUB1;Q9UHD1-2;Q9UHD1	A9YUB1;Q9UHD1-2;Q9UHD1	9;6;6	9;6;6	9;6;6	Cysteine and histidine-rich domain-containing protein 1	CHORDC1	sp|A9YUB1|CHRD1_PIG Cysteine and histidine-rich domain-containing protein 1 OS=Sus scrofa OX=9823 GN=CHORDC1 PE=2 SV=1;sp|Q9UHD1-2|CHRD1_HUMAN Isoform 2 of Cysteine and histidine-rich domain-containing protein 1 OS=Homo sapiens OX=9606 GN=CHORDC1;sp|Q9UHD1	3	9	9	9	4	5	5	7	6	5	4	4	4	5	6	6	6	6	4	5	6	4	4	5	5	4	5	4	6	5	5	5	6	5	6	6	4	7	5	6	5	7
B0FWK4	B0FWK4	1	1	1			sp|B0FWK4|SPCS1_PIG Signal peptidase complex subunit 1 OS=Sus scrofa OX=9823 GN=SPCS1 PE=3 SV=1	1	1	1	1	1	1	1	1	1	1	1	1	1	1	1	1	1	1	1	1	1	1	1	1	1	1	1	1	1	1	1	1	1	1	1	1	1	1	1	1	1	1
B0KYV5;B0KYV5-2;Q9UHB6-3;Q9UHB6-2;Q9UHB6-5;Q9UHB6;Q9UHB6-4	B0KYV5;B0KYV5-2	10;7;1;1;1;1;1	10;7;1;1;1;1;1	10;7;1;1;1;1;1			sp|B0KYV5|LIMA1_PIG LIM domain and actin-binding protein 1 OS=Sus scrofa OX=9823 GN=LIMA1 PE=2 SV=1;sp|B0KYV5-2|LIMA1_PIG Isoform 2 of LIM domain and actin-binding protein 1 OS=Sus scrofa OX=9823 GN=LIMA1	7	10	10	10	3	2	2	3	3	2	1	2	2	3	2	4	3	2	3	3	1	3	3	5	1	2	2	2	2	2	3	0	3	1	4	3	2	2	3	2	2	4
B1AK53;B1AK53-2	B1AK53	3;1	3;1	3;1	Espin	ESPN	sp|B1AK53|ESPN_HUMAN Espin OS=Homo sapiens OX=9606 GN=ESPN PE=1 SV=1	2	3	3	3	0	0	1	1	0	1	1	1	0	0	1	0	0	1	0	1	0	0	2	1	0	1	1	2	2	1	1	1	1	0	2	1	0	1	1	1	0	0
B1PK17;P45381	B1PK17;P45381	1;1	1;1	1;1	Aspartoacylase	ASPA	sp|B1PK17|ACY2_PIG Aspartoacylase OS=Sus scrofa OX=9823 GN=ASPA PE=2 SV=1;sp|P45381|ACY2_HUMAN Aspartoacylase OS=Homo sapiens OX=9606 GN=ASPA PE=1 SV=1	2	1	1	1	1	0	0	0	0	0	0	0	0	0	0	0	0	0	0	0	0	0	0	0	0	0	0	0	0	0	0	0	0	0	0	0	1	0	0	0	1	0
B2DCZ9	B2DCZ9	1	1	1			sp|B2DCZ9|ARHG2_PIG Rho guanine nucleotide exchange factor 2 OS=Sus scrofa OX=9823 GN=ARHGEF2 PE=2 SV=1	1	1	1	1	0	0	0	0	0	0	0	0	0	0	0	0	0	0	0	0	0	0	0	0	1	0	0	0	0	0	0	0	0	0	0	0	0	0	0	0	0	0
B2LYG4;Q8N6M3	B2LYG4;Q8N6M3	2;1	2;1	2;1	Fat storage-inducing transmembrane protein 2	FITM2	sp|B2LYG4|FITM2_PIG Fat storage-inducing transmembrane protein 2 OS=Sus scrofa OX=9823 GN=FITM2 PE=2 SV=1;sp|Q8N6M3|FITM2_HUMAN Fat storage-inducing transmembrane protein 2 OS=Homo sapiens OX=9606 GN=FITM2 PE=1 SV=1	2	2	2	2	1	1	0	1	1	1	1	0	0	0	1	1	1	1	1	0	1	1	0	0	0	0	1	0	1	1	1	1	1	0	1	0	2	0	0	1	1	1
B3SP85	B3SP85	2	2	2			sp|B3SP85|GILT_PIG Gamma-interferon-inducible-lysosomal thiol reductase OS=Sus scrofa OX=9823 GN=IFI30 PE=2 SV=1	1	2	2	2	0	0	0	0	0	0	0	0	0	0	0	0	0	0	0	0	0	0	0	0	0	0	0	0	1	0	0	0	0	0	0	0	0	0	0	0	0	0
B5ME19;Q99613;Q99613-2	B5ME19;Q99613;Q99613-2	10;10;9	10;10;9	10;10;9	Eukaryotic translation initiation factor 3 subunit C-like protein;Eukaryotic translation initiation factor 3 subunit C	EIF3CL;EIF3C	sp|B5ME19|EIFCL_HUMAN Eukaryotic translation initiation factor 3 subunit C-like protein OS=Homo sapiens OX=9606 GN=EIF3CL PE=1 SV=1;sp|Q99613|EIF3C_HUMAN Eukaryotic translation initiation factor 3 subunit C OS=Homo sapiens OX=9606 GN=EIF3C PE=1 SV=1;sp|Q99	3	10	10	10	5	6	5	4	4	6	5	4	6	4	5	5	5	6	3	5	5	5	4	5	4	5	5	4	6	7	4	5	5	6	6	6	4	5	6	5	5	4
B6CVD7;Q96HE7	B6CVD7;Q96HE7	12;8	12;8	12;8	ERO1-like protein alpha	ERO1L	sp|B6CVD7|ERO1A_PIG ERO1-like protein alpha OS=Sus scrofa OX=9823 GN=ERO1A PE=2 SV=1;sp|Q96HE7|ERO1A_HUMAN ERO1-like protein alpha OS=Homo sapiens OX=9606 GN=ERO1A PE=1 SV=2	2	12	12	12	6	2	2	1	2	1	2	3	2	5	3	2	3	1	2	2	2	2	3	2	0	4	2	1	4	2	3	2	3	3	3	5	6	3	5	3	5	2
B7ZAQ6-2;B7ZAQ6-3;P0CG08;B7ZAQ6	B7ZAQ6-2;B7ZAQ6-3;P0CG08;B7ZAQ6	2;2;2;2	2;2;2;2	2;2;2;2	Golgi pH regulator A;Golgi pH regulator B	GPR89A;GPR89B	sp|B7ZAQ6-2|GPHRA_HUMAN Isoform 2 of Golgi pH regulator A OS=Homo sapiens OX=9606 GN=GPR89A;sp|B7ZAQ6-3|GPHRA_HUMAN Isoform 3 of Golgi pH regulator A OS=Homo sapiens OX=9606 GN=GPR89A;sp|P0CG08|GPHRB_HUMAN Golgi pH regulator B OS=Homo sapiens OX=9606 GN=GP	4	2	2	2	0	0	0	0	0	0	0	1	0	0	0	1	0	1	0	1	0	1	0	1	0	0	0	1	0	0	0	1	0	0	0	1	0	0	0	0	0	0
C5HGF3;Q9UM00-1;Q9UM00-2;Q9UM00	C5HGF3;Q9UM00-1;Q9UM00-2;Q9UM00	1;1;1;1	1;1;1;1	1;1;1;1	Transmembrane and coiled-coil domain-containing protein 1	TMCO1	sp|C5HGF3|TMCO1_PIG Calcium load-activated calcium channel OS=Sus scrofa OX=9823 GN=TMCO1 PE=2 SV=1;sp|Q9UM00-1|TMCO1_HUMAN Isoform 3 of Calcium load-activated calcium channel OS=Homo sapiens OX=9606 GN=TMCO1;sp|Q9UM00-2|TMCO1_HUMAN Isoform 2 of Calcium lo	4	1	1	1	0	1	1	1	0	1	1	1	0	1	1	1	0	1	1	1	0	1	1	1	0	1	1	1	0	1	1	1	1	0	1	1	1	0	1	1	1	1
C9JLW8	C9JLW8	1	1	1	Protein FAM195B	FAM195B	sp|C9JLW8|MCRI1_HUMAN Mapk-regulated corepressor-interacting protein 1 OS=Homo sapiens OX=9606 GN=MCRIP1 PE=1 SV=1	1	1	1	1	1	0	1	0	1	1	1	0	1	0	0	0	1	0	0	0	0	0	0	0	1	0	1	0	1	0	0	0	1	0	1	0	1	1	0	1	0	1
CON__A2I7N1;CON__A2I7N0	CON__A2I7N1;CON__A2I7N0	2;2	2;2	1;1			;	2	2	2	1	1	2	2	2	1	2	2	2	1	1	1	1	1	1	2	1	1	1	1	1	1	1	1	1	1	2	1	2	1	1	2	2	1	2	2	1	1	1
CON__ENSEMBL:ENSBTAP00000018229;CON__Q3MHN5;P02774-2;P02774;P02774-3	CON__ENSEMBL:ENSBTAP00000018229;CON__Q3MHN5;P02774-2;P02774;P02774-3	4;3;2;2;2	4;3;2;2;2	4;3;2;2;2	Vitamin D-binding protein	GC	;;sp|P02774-2|VTDB_HUMAN Isoform 2 of Vitamin D-binding protein OS=Homo sapiens OX=9606 GN=GC;sp|P02774|VTDB_HUMAN Vitamin D-binding protein OS=Homo sapiens OX=9606 GN=GC PE=1 SV=2;sp|P02774-3|VTDB_HUMAN Isoform 3 of Vitamin D-binding protein OS=Homo sapie	5	4	4	4	3	3	3	1	4	3	3	3	3	1	1	1	2	3	2	2	2	2	2	2	2	2	1	2	3	2	2	2	3	2	3	3	3	3	3	2	3	3
CON__O43790;CON__Q6NT21;CON__P78385;CON__Q14533;O43790;P78385;Q14533;A6NCN2	CON__O43790;CON__Q6NT21;CON__P78385;CON__Q14533;O43790;P78385;Q14533;A6NCN2	2;2;2;2;2;2;2;1	1;1;1;1;1;1;1;1	1;1;1;1;1;1;1;1	Keratin, type II cuticular Hb6;Keratin, type II cuticular Hb3;Keratin, type II cuticular Hb1;Putative keratin-87 protein	KRT86;KRT83;KRT81;KRT87P	;;;;sp|O43790|KRT86_HUMAN Keratin, type II cuticular Hb6 OS=Homo sapiens OX=9606 GN=KRT86 PE=1 SV=1;sp|P78385|KRT83_HUMAN Keratin, type II cuticular Hb3 OS=Homo sapiens OX=9606 GN=KRT83 PE=1 SV=2;sp|Q14533|KRT81_HUMAN Keratin, type II cuticular Hb1 OS=Homo	8	2	1	1	0	0	0	0	0	0	0	0	1	0	0	0	0	0	0	0	0	0	0	0	0	0	0	1	0	0	0	0	0	0	1	1	0	0	0	0	0	0
P00761;CON__P00761	P00761;CON__P00761	1;1	1;1	1;1			sp|P00761|TRYP_PIG Trypsin OS=Sus scrofa OX=9823 PE=1 SV=1;	2	1	1	1	1	1	1	1	1	1	1	1	1	1	1	1	1	1	1	0	1	1	1	1	1	1	1	0	1	1	1	0	1	1	1	1	1	1	1	0	1	1
CON__P01030	CON__P01030	1	1	1				1	1	1	1	0	0	0	1	1	0	1	1	0	0	0	0	0	0	0	0	0	0	1	1	0	0	0	0	0	0	0	0	0	0	0	0	0	0	0	0	0	0
CON__P02533;P02533;CON__Q6IFX2;CON__P08727;CON__P19001;P08727;CON__Q61782	CON__P02533;P02533	15;15;7;4;4;4;3	8;8;2;0;0;0;1	7;7;2;0;0;0;1	Keratin, type I cytoskeletal 14	KRT14	;sp|P02533|K1C14_HUMAN Keratin, type I cytoskeletal 14 OS=Homo sapiens OX=9606 GN=KRT14 PE=1 SV=4	7	15	8	7	8	5	7	8	3	6	3	6	3	5	6	6	3	6	3	4	5	3	5	4	8	7	5	6	6	6	8	6	5	6	5	5	5	6	4	4	8	8
CON__P02538;P02538;CON__O95678;O95678	CON__P02538;P02538	14;14;5;5	1;1;0;0	1;1;0;0	Keratin, type II cytoskeletal 6A	KRT6A	;sp|P02538|K2C6A_HUMAN Keratin, type II cytoskeletal 6A OS=Homo sapiens OX=9606 GN=KRT6A PE=1 SV=3	4	14	1	1	6	8	6	8	3	2	2	3	5	3	3	2	4	2	3	3	3	4	3	3	4	4	4	3	5	4	4	9	2	3	5	4	5	5	3	2	6	7
CON__P02584	CON__P02584	6	6	3				1	6	6	3	4	3	3	3	3	3	3	3	4	3	5	5	3	4	3	3	2	3	4	4	3	3	3	4	4	3	3	3	3	3	3	4	5	3	3	4	4	3
CON__P02662	CON__P02662	4	4	4				1	4	4	4	0	0	0	0	0	0	0	0	0	0	0	0	0	0	0	0	3	3	3	3	0	0	0	0	1	0	0	1	0	0	0	0	0	0	0	0	0	0
CON__P02668	CON__P02668	1	1	1				1	1	1	1	0	0	0	0	0	0	0	0	0	0	0	0	0	0	0	0	0	1	0	1	0	0	0	0	0	0	0	0	0	0	0	0	0	0	0	0	0	0
CON__P02676	CON__P02676	5	5	4				1	5	5	4	2	0	1	1	2	1	3	1	1	1	0	1	0	0	0	0	0	0	1	1	0	0	0	0	0	0	0	1	0	0	1	0	2	0	1	1	2	1
CON__P02754	CON__P02754	1	1	1				1	1	1	1	0	0	0	0	0	0	0	0	0	0	0	0	0	0	0	0	1	0	0	0	0	0	0	0	0	0	0	0	0	0	0	0	0	0	0	0	0	0
CON__P02768-1;P02768;P02768-3;P02768-2	CON__P02768-1;P02768;P02768-3	9;9;7;4	5;5;5;3	4;4;4;2	Serum albumin	ALB	;sp|P02768|ALBU_HUMAN Albumin OS=Homo sapiens OX=9606 GN=ALB PE=1 SV=2;sp|P02768-3|ALBU_HUMAN Isoform 3 of Albumin OS=Homo sapiens OX=9606 GN=ALB	4	9	5	4	2	4	3	3	2	4	3	2	0	2	0	0	1	2	1	2	1	2	0	2	0	2	0	2	0	0	0	2	2	2	2	3	1	3	2	3	2	4
CON__P08729;CON__Q3KNV1;P08729	CON__P08729;CON__Q3KNV1;P08729	5;5;5	2;2;2	2;2;2	Keratin, type II cytoskeletal 7	KRT7	;;sp|P08729|K2C7_HUMAN Keratin, type II cytoskeletal 7 OS=Homo sapiens OX=9606 GN=KRT7 PE=1 SV=5	3	5	2	2	1	1	0	2	0	1	0	0	0	1	0	0	1	1	0	0	1	2	0	1	1	1	1	1	1	1	1	2	1	1	2	2	0	0	0	0	2	1
CON__P08779;P08779	CON__P08779;P08779	18;18	15;15	8;8	Keratin, type I cytoskeletal 16	KRT16	;sp|P08779|K1C16_HUMAN Keratin, type I cytoskeletal 16 OS=Homo sapiens OX=9606 GN=KRT16 PE=1 SV=4	2	18	15	8	7	6	6	8	3	3	1	4	4	5	4	5	1	6	2	4	4	4	5	4	6	7	5	5	7	6	6	6	6	4	5	3	3	5	5	3	7	7
CON__P13645;P13645;CON__P02535-1;Q7Z3Y7;CON__Q7Z3Y7;CON__Q148H6;CON__P05784;CON__Q7Z3Y8;Q7Z3Z0;CON__Q7Z3Z0;Q2M2I5;CON__Q2M2I5;CON__Q7Z3Y9;CON__O76013;CON__REFSEQ:XP_986630;CON__Q99456;CON__A2A5Y0;CON__O76015;CON__O76014;CON__Q15323;CON__Q9UE12;Q99456;CON__Q14532;O76015;O76013;O76014;Q7Z3Y9;CON__Q497I4;Q92764;O76013-2;Q15323;CON__Q92764;CON__A2AB72;Q14532	CON__P13645;P13645	24;24;6;3;3;3;2;2;2;2;2;2;1;1;1;1;1;1;1;1;1;1;1;1;1;1;1;1;1;1;1;1;1;1	23;23;6;3;3;3;1;2;2;2;2;2;1;1;1;0;1;1;1;1;1;0;1;1;1;1;1;1;1;1;1;1;1;1	19;19;3;0;0;0;0;0;0;0;0;0;0;0;0;0;0;0;0;0;0;0;0;0;0;0;0;0;0;0;0;0;0;0	Keratin, type I cytoskeletal 10	KRT10	;sp|P13645|K1C10_HUMAN Keratin, type I cytoskeletal 10 OS=Homo sapiens OX=9606 GN=KRT10 PE=1 SV=6	34	24	23	19	15	15	19	16	8	11	13	13	10	10	8	10	8	12	8	9	11	11	13	10	11	14	10	12	14	15	14	15	9	11	12	13	9	14	13	11	17	18
CON__P13647;P13647	CON__P13647;P13647	11;11	5;5	2;2	Keratin, type II cytoskeletal 5	KRT5	;sp|P13647|K2C5_HUMAN Keratin, type II cytoskeletal 5 OS=Homo sapiens OX=9606 GN=KRT5 PE=1 SV=3	2	11	5	2	6	7	5	7	3	2	2	3	3	3	2	1	3	1	3	2	4	4	2	4	3	3	3	3	6	3	4	6	2	3	3	4	3	3	3	2	6	6
CON__P15497	CON__P15497	6	1	1				1	6	1	1	4	4	5	4	4	5	5	4	4	4	3	4	4	3	5	4	4	4	4	4	3	4	4	4	3	4	4	4	4	4	5	5	4	4	5	4	5	5
CON__P17690	CON__P17690	2	2	2				1	2	2	2	2	1	2	1	2	2	2	1	1	0	0	1	0	1	0	0	1	0	0	0	2	0	0	0	2	1	1	0	1	1	2	2	2	1	2	0	2	0
CON__P35527;P35527	CON__P35527;P35527	26;26	26;26	25;25	Keratin, type I cytoskeletal 9	KRT9	;sp|P35527|K1C9_HUMAN Keratin, type I cytoskeletal 9 OS=Homo sapiens OX=9606 GN=KRT9 PE=1 SV=3	2	26	26	25	17	18	18	21	12	11	13	11	12	13	15	17	11	14	12	16	13	12	13	16	11	16	15	16	17	17	18	20	11	9	17	15	11	14	12	19	17	16
CON__P35908;CON__Q9R0H5;CON__Q6NXH9;CON__REFSEQ:XP_932229	CON__P35908	21;2;2;1	1;0;0;0	1;0;0;0				4	21	1	1	14	15	16	15	11	13	12	13	10	10	8	10	10	10	10	11	12	13	12	13	10	10	12	12	14	13	15	14	12	10	11	14	11	13	12	11	13	17
CON__P35908v2;P35908	CON__P35908v2;P35908	21;21	19;19	1;1	Keratin, type II cytoskeletal 2 epidermal	KRT2	;sp|P35908|K22E_HUMAN Keratin, type II cytoskeletal 2 epidermal OS=Homo sapiens OX=9606 GN=KRT2 PE=1 SV=2	2	21	19	1	14	15	16	15	11	13	12	13	10	11	9	10	10	10	10	11	12	13	13	13	10	10	12	12	14	13	15	14	12	10	11	14	11	12	12	11	13	17
CON__P41361	CON__P41361	3	3	3				1	3	3	3	1	1	0	1	2	0	1	2	1	0	0	0	0	1	0	1	0	0	0	1	0	0	0	0	1	0	1	0	2	0	1	1	2	0	1	0	1	0
P48668;CON__P48668;CON__P04259	P48668;CON__P48668;CON__P04259	14;14;13	10;10;9	0;0;0	Keratin, type II cytoskeletal 6C	KRT6C	sp|P48668|K2C6C_HUMAN Keratin, type II cytoskeletal 6C OS=Homo sapiens OX=9606 GN=KRT6C PE=1 SV=3;;	3	14	10	0	6	7	5	7	3	2	2	3	4	3	4	2	4	1	3	2	3	4	3	3	3	4	3	3	4	5	3	9	2	4	4	4	4	4	3	2	6	6
CON__P62894;P62895;P99999	CON__P62894;P62895	6;6;1	6;6;1	6;6;1			;sp|P62895|CYC_PIG Cytochrome c OS=Sus scrofa OX=9823 GN=CYCS PE=1 SV=2	3	6	6	6	3	5	4	5	4	5	4	3	3	5	3	5	4	5	3	4	5	5	3	4	6	6	4	4	5	4	4	5	5	5	6	6	5	5	6	6	4	4
CON__Q04695;Q04695;CON__Q9QWL7	CON__Q04695;Q04695;CON__Q9QWL7	11;11;10	5;5;4	5;5;4	Keratin, type I cytoskeletal 17	KRT17	;sp|Q04695|K1C17_HUMAN Keratin, type I cytoskeletal 17 OS=Homo sapiens OX=9606 GN=KRT17 PE=1 SV=2;	3	11	5	5	3	2	2	4	0	1	0	1	0	2	2	2	0	2	0	1	1	0	0	1	1	2	0	3	3	2	3	3	2	2	1	1	3	2	1	0	5	4
CON__Q0IIK2;CON__Q29443	CON__Q0IIK2;CON__Q29443	6;5	2;1	2;1			;	2	6	2	2	4	4	4	4	5	4	4	4	2	2	3	3	4	5	4	4	4	2	2	3	3	2	2	2	3	3	3	4	5	4	5	4	5	5	4	4	3	5
CON__Q0V8M9	CON__Q0V8M9	2	2	1				1	2	2	1	0	0	0	0	0	0	0	0	0	0	0	0	0	0	0	0	0	0	0	0	0	0	0	0	0	0	0	0	0	0	0	0	0	1	0	0	0	1
CON__Q14525;Q14525;CON__O76011;CON__Q6NTB9;CON__O76009;CON__Q8IUT8;O76009;O76011	CON__Q14525;Q14525;CON__O76011;CON__Q6NTB9;CON__O76009;CON__Q8IUT8;O76009;O76011	2;2;1;1;1;1;1;1	1;1;1;1;1;1;1;1	1;1;1;1;1;1;1;1	Keratin, type I cuticular Ha3-II;Keratin, type I cuticular Ha3-I;Keratin, type I cuticular Ha4	KRT33B;KRT33A;KRT34	;sp|Q14525|KT33B_HUMAN Keratin, type I cuticular Ha3-II OS=Homo sapiens OX=9606 GN=KRT33B PE=1 SV=3;;;;;sp|O76009|KT33A_HUMAN Keratin, type I cuticular Ha3-I OS=Homo sapiens OX=9606 GN=KRT33A PE=2 SV=2;sp|O76011|KRT34_HUMAN Keratin, type I cuticular Ha4 OS	8	2	1	1	1	0	0	0	0	0	0	0	0	0	0	0	0	0	0	0	0	0	0	0	0	0	0	1	0	0	0	0	0	0	0	0	0	0	1	0	1	0
CON__Q28085	CON__Q28085	2	2	2				1	2	2	2	0	0	0	0	0	1	1	0	0	0	0	0	0	0	0	0	0	0	0	0	0	0	0	0	0	0	0	0	1	0	0	0	0	0	0	0	0	0
CON__Q2KIF2	CON__Q2KIF2	1	1	1				1	1	1	1	1	0	0	0	1	0	0	0	0	0	0	0	0	1	0	0	0	0	0	0	0	0	0	0	0	0	0	0	0	0	0	0	1	0	0	0	0	0
CON__Q2YDI2;O43929-2;O43929-3;O43929	CON__Q2YDI2;O43929-2;O43929-3;O43929	2;2;2;2	2;2;2;2	2;2;2;2	Origin recognition complex subunit 4	ORC4	;sp|O43929-2|ORC4_HUMAN Isoform 2 of Origin recognition complex subunit 4 OS=Homo sapiens OX=9606 GN=ORC4;sp|O43929-3|ORC4_HUMAN Isoform 3 of Origin recognition complex subunit 4 OS=Homo sapiens OX=9606 GN=ORC4;sp|O43929|ORC4_HUMAN Origin recognition compl	4	2	2	2	2	0	0	0	1	0	0	0	0	0	0	0	2	0	0	0	2	1	0	0	1	0	0	0	1	0	0	0	0	0	0	0	0	0	0	0	1	0
CON__Q32PJ2;O46409	CON__Q32PJ2;O46409	2;2	2;2	2;2			;sp|O46409|APOA4_PIG Apolipoprotein A-IV OS=Sus scrofa OX=9823 GN=APOA4 PE=2 SV=1	2	2	2	2	0	1	0	0	1	1	0	1	0	0	1	0	0	0	0	0	0	0	0	0	0	0	0	0	1	0	0	1	1	0	0	0	0	0	2	0	0	0
CON__Q3SX09;CON__P02070	CON__Q3SX09;CON__P02070	4;3	3;2	3;2			;	2	4	3	3	2	2	2	2	2	2	2	2	2	2	2	2	2	2	2	2	2	2	2	2	2	2	2	2	2	2	2	2	2	2	2	2	2	2	2	2	2	2
CON__Q3Y5Z3	CON__Q3Y5Z3	1	1	1				1	1	1	1	0	0	0	0	0	0	1	0	0	0	0	0	0	0	0	0	1	0	0	0	0	0	0	0	0	0	0	0	0	0	0	0	0	0	0	0	0	0
CON__Q9Z2K1;CON__Q3ZAW8	CON__Q9Z2K1;CON__Q3ZAW8	8;8	1;1	1;1			;	2	8	1	1	3	1	2	2	1	0	0	0	1	1	0	1	0	1	1	1	1	1	2	1	3	2	1	1	2	2	3	2	2	2	1	1	2	2	1	2	3	2
CON__Q6ISB0;CON__Q9NSB2;Q9NSB2	CON__Q6ISB0;CON__Q9NSB2;Q9NSB2	6;6;6	3;3;3	3;3;3	Keratin, type II cuticular Hb4	KRT84	;;sp|Q9NSB2|KRT84_HUMAN Keratin, type II cuticular Hb4 OS=Homo sapiens OX=9606 GN=KRT84 PE=2 SV=2	3	6	3	3	1	1	0	2	0	0	0	0	0	0	0	0	0	0	0	1	0	1	0	1	0	0	0	1	0	0	0	1	0	0	1	1	0	1	3	1	1	1
CON__Q8N1N4-2;CON__Q7RTT2;Q8N1N4-2;Q8N1N4	CON__Q8N1N4-2;CON__Q7RTT2;Q8N1N4-2;Q8N1N4	2;2;2;2	1;1;1;1	1;1;1;1	Keratin, type II cytoskeletal 78	KRT78	;;sp|Q8N1N4-2|K2C78_HUMAN Isoform 2 of Keratin, type II cytoskeletal 78 OS=Homo sapiens OX=9606 GN=KRT78;sp|Q8N1N4|K2C78_HUMAN Keratin, type II cytoskeletal 78 OS=Homo sapiens OX=9606 GN=KRT78 PE=1 SV=2	4	2	1	1	0	0	0	0	0	0	0	0	0	0	0	0	0	0	0	0	0	0	0	0	0	0	0	1	0	0	0	0	0	0	1	1	0	0	0	0	1	0
Q7Z794;CON__Q7Z794;CON__Q6IFZ6	Q7Z794;CON__Q7Z794;CON__Q6IFZ6	4;4;3	2;2;1	2;2;1	Keratin, type II cytoskeletal 1b	KRT77	sp|Q7Z794|K2C1B_HUMAN Keratin, type II cytoskeletal 1b OS=Homo sapiens OX=9606 GN=KRT77 PE=1 SV=3;;	3	4	2	2	3	2	2	2	1	1	1	1	1	1	1	1	1	1	1	1	1	2	1	2	1	1	1	1	1	1	1	2	1	1	1	1	1	1	1	1	3	2
CON__Q86YZ3;Q86YZ3	CON__Q86YZ3;Q86YZ3	3;3	3;3	3;3	Hornerin	HRNR	;sp|Q86YZ3|HORN_HUMAN Hornerin OS=Homo sapiens OX=9606 GN=HRNR PE=1 SV=2	2	3	3	3	0	1	0	0	0	0	0	0	0	0	0	0	0	0	0	0	0	0	0	0	0	0	0	0	0	1	1	0	0	0	0	1	0	0	2	0	0	1
CON__Q95121	CON__Q95121	3	3	1				1	3	3	1	1	1	0	1	1	0	1	1	1	0	0	0	1	0	1	1	1	1	1	1	1	1	1	1	1	1	1	1	0	0	1	1	0	0	0	1	1	1
CON__Q9TTE1	CON__Q9TTE1	2	1	1				1	2	1	1	0	1	2	2	0	2	2	2	0	0	0	1	0	1	1	1	0	0	0	0	0	0	0	0	0	2	1	2	0	1	2	2	0	1	2	1	0	0
CON__REFSEQ:XP_585019	CON__REFSEQ:XP_585019	1	1	1				1	1	1	1	0	0	0	0	0	0	0	0	0	0	0	0	0	0	0	0	0	0	0	0	0	0	0	0	0	0	0	0	0	0	0	0	0	0	0	0	0	0
D0VWV4	D0VWV4	2	2	2			sp|D0VWV4|C560_PIG Succinate dehydrogenase cytochrome b560 subunit, mitochondrial OS=Sus scrofa OX=9823 GN=SDHC PE=1 SV=2	1	2	2	2	1	2	1	1	1	2	1	0	1	1	1	1	1	2	1	1	2	2	1	0	2	1	2	0	2	2	1	1	1	1	1	0	1	2	2	2	1	1
D2SW95	D2SW95	23	23	1			sp|D2SW95|COPB_PIG Coatomer subunit beta OS=Sus scrofa OX=9823 GN=COPB1 PE=2 SV=1	1	23	23	1	14	10	9	10	13	8	8	5	10	9	7	9	12	13	9	6	11	12	9	9	8	8	9	9	14	11	7	10	10	12	10	14	12	10	11	8	9	7
D2WKD8;P54707;P54707-2	D2WKD8	21;4;4	8;0;0	2;0;0			sp|D2WKD8|AT1A2_PIG Sodium/potassium-transporting ATPase subunit alpha-2 OS=Sus scrofa OX=9823 GN=ATP1A2 PE=1 SV=1	3	21	8	2	13	16	16	14	12	14	14	14	16	14	13	13	13	18	16	15	17	16	16	13	15	14	17	15	16	13	12	17	17	18	15	17	12	15	17	12	12	18
D7PF45;O15357;O15357-2	D7PF45;O15357;O15357-2	4;3;2	4;3;2	4;3;2	Phosphatidylinositol 3,4,5-trisphosphate 5-phosphatase 2	INPPL1	sp|D7PF45|SHIP2_PIG Phosphatidylinositol 3,4,5-trisphosphate 5-phosphatase 2 OS=Sus scrofa OX=9823 GN=INPPL1 PE=1 SV=2;sp|O15357|SHIP2_HUMAN Phosphatidylinositol 3,4,5-trisphosphate 5-phosphatase 2 OS=Homo sapiens OX=9606 GN=INPPL1 PE=1 SV=2;sp|O15357-2|SH	3	4	4	4	0	0	0	0	0	0	0	0	0	0	0	0	0	1	0	0	0	1	0	0	0	0	0	0	0	2	0	0	1	0	0	1	0	0	0	0	0	0
Q13765;E9PAV3-2;E9PAV3;Q9BZK3	Q13765;E9PAV3-2;E9PAV3	5;5;5;1	5;5;5;1	5;5;5;1	Nascent polypeptide-associated complex subunit alpha;Nascent polypeptide-associated complex subunit alpha, muscle-specific form	NACA	sp|Q13765|NACA_HUMAN Nascent polypeptide-associated complex subunit alpha OS=Homo sapiens OX=9606 GN=NACA PE=1 SV=1;sp|E9PAV3-2|NACAM_HUMAN Isoform skNAC-2 of Nascent polypeptide-associated complex subunit alpha, muscle-specific form OS=Homo sapiens OX=960	4	5	5	5	4	3	4	4	4	4	3	3	4	4	4	4	3	4	4	4	3	3	3	4	3	4	3	4	4	5	4	5	3	3	4	4	2	4	3	4	3	4
F1RKQ4;Q3LXA3-2;Q3LXA3	F1RKQ4	16;4;4	16;4;4	16;4;4			sp|F1RKQ4|TKFC_PIG Triokinase/FMN cyclase OS=Sus scrofa OX=9823 GN=TKFC PE=1 SV=2	3	16	16	16	11	9	11	10	10	8	10	11	10	10	9	10	9	8	7	10	9	8	8	8	10	8	9	11	7	4	8	10	8	8	11	8	10	9	6	11	11	9
F1RQM2;O95394;O95394-3;O95394-4	F1RQM2	13;3;3;3	13;3;3;3	13;3;3;3			sp|F1RQM2|AGM1_PIG Phosphoacetylglucosamine mutase OS=Sus scrofa OX=9823 GN=PGM3 PE=1 SV=2	4	13	13	13	7	8	7	6	6	6	4	4	7	6	5	4	6	7	8	6	8	9	7	7	6	5	7	7	6	6	7	8	9	8	8	10	4	8	8	8	7	8
F1RT67;Q9NX62	F1RT67;Q9NX62	2;1	2;1	2;1	Inositol monophosphatase 3	IMPAD1	sp|F1RT67|IMPA3_PIG Golgi-resident adenosine 3,5-bisphosphate 3-phosphatase OS=Sus scrofa OX=9823 GN=BPNT2 PE=3 SV=1;sp|Q9NX62|IMPA3_HUMAN Golgi-resident adenosine 3,5-bisphosphate 3-phosphatase OS=Homo sapiens OX=9606 GN=BPNT2 PE=1 SV=1	2	2	2	2	1	1	1	1	1	0	0	2	2	1	1	1	1	1	1	2	0	2	1	2	0	2	0	2	0	1	1	2	1	1	1	1	0	2	1	0	0	1
F1S584;Q8IWA5	F1S584;Q8IWA5	7;4	7;4	3;0	Choline transporter-like protein 2	SLC44A2	sp|F1S584|CTL2_PIG Choline transporter-like protein 2 OS=Sus scrofa OX=9823 GN=SLC44A2 PE=3 SV=1;sp|Q8IWA5|CTL2_HUMAN Choline transporter-like protein 2 OS=Homo sapiens OX=9606 GN=SLC44A2 PE=1 SV=3	2	7	7	3	2	3	2	2	4	2	2	1	3	2	2	2	5	4	3	2	5	3	2	3	4	3	3	3	5	2	2	3	3	2	1	2	4	3	3	3	3	2
F1S5L4;Q9HCL2	F1S5L4;Q9HCL2	3;2	3;2	3;2	Glycerol-3-phosphate acyltransferase 1, mitochondrial	GPAM	sp|F1S5L4|GPAT1_PIG Glycerol-3-phosphate acyltransferase 1, mitochondrial OS=Sus scrofa OX=9823 GN=GPAM PE=2 SV=3;sp|Q9HCL2|GPAT1_HUMAN Glycerol-3-phosphate acyltransferase 1, mitochondrial OS=Homo sapiens OX=9606 GN=GPAM PE=1 SV=3	2	3	3	3	0	0	0	0	0	0	0	0	0	0	0	0	1	0	0	0	0	0	0	0	0	0	0	0	0	0	0	1	0	0	0	1	1	1	0	0	0	0
F1SPM8;Q9NSY1-2;Q9NSY1-3	F1SPM8	24;1;1	24;1;1	9;0;0			sp|F1SPM8|AAK1_PIG AP2-associated protein kinase 1 OS=Sus scrofa OX=9823 GN=AAK1 PE=2 SV=2	3	24	24	9	11	12	14	10	12	15	14	15	13	10	12	12	13	14	12	13	11	13	11	12	14	13	13	14	14	10	13	16	14	13	15	14	12	11	13	10	10	14
I3L5V6;Q6SZW1;Q6SZW1-2	I3L5V6;Q6SZW1;Q6SZW1-2	9;6;5	9;6;5	9;6;5	Sterile alpha and TIR motif-containing protein 1	SARM1	sp|I3L5V6|SARM1_PIG NAD(+) hydrolase SARM1 OS=Sus scrofa OX=9823 GN=SARM1 PE=2 SV=1;sp|Q6SZW1|SARM1_HUMAN NAD(+) hydrolase SARM1 OS=Homo sapiens OX=9606 GN=SARM1 PE=1 SV=1;sp|Q6SZW1-2|SARM1_HUMAN Isoform 2 of NAD(+) hydrolase SARM1 OS=Homo sapiens OX=9606	3	9	9	9	2	1	0	3	2	1	1	0	0	2	1	1	1	0	1	1	1	0	0	1	2	0	2	1	0	1	1	2	1	1	1	0	1	2	1	1	1	0
I3LHS8;Q9NPI6-2;Q9NPI6	I3LHS8;Q9NPI6-2;Q9NPI6	2;1;1	2;1;1	2;1;1	mRNA-decapping enzyme 1A	DCP1A	sp|I3LHS8|DCP1A_PIG mRNA-decapping enzyme 1A OS=Sus scrofa OX=9823 GN=DCP1A PE=1 SV=1;sp|Q9NPI6-2|DCP1A_HUMAN Isoform 2 of mRNA-decapping enzyme 1A OS=Homo sapiens OX=9606 GN=DCP1A;sp|Q9NPI6|DCP1A_HUMAN mRNA-decapping enzyme 1A OS=Homo sapiens OX=9606 GN=D	3	2	2	2	0	0	1	0	1	0	0	0	1	0	0	0	0	0	0	1	1	0	1	0	1	1	0	0	0	0	0	1	1	0	0	0	0	1	0	0	0	1
I3LUP1;Q96IJ6;Q96IJ6-2	I3LUP1;Q96IJ6;Q96IJ6-2	5;3;3	5;3;3	5;3;3	Mannose-1-phosphate guanyltransferase alpha	GMPPA	sp|I3LUP1|GMPPA_PIG Mannose-1-phosphate guanyltransferase alpha OS=Sus scrofa OX=9823 GN=GMPPA PE=1 SV=2;sp|Q96IJ6|GMPPA_HUMAN Mannose-1-phosphate guanyltransferase alpha OS=Homo sapiens OX=9606 GN=GMPPA PE=1 SV=1;sp|Q96IJ6-2|GMPPA_HUMAN Isoform 2 of Manno	3	5	5	5	0	1	0	0	1	2	0	0	2	1	0	1	1	1	0	1	1	1	0	0	1	1	0	1	1	0	0	0	1	0	0	1	2	3	0	0	1	1
M3TYT0	M3TYT0	8	8	1			sp|M3TYT0|ROCK2_PIG Rho-associated protein kinase 2 OS=Sus scrofa OX=9823 GN=ROCK2 PE=1 SV=1	1	8	8	1	3	2	1	1	3	4	1	2	5	2	1	0	3	3	1	2	3	2	2	3	3	0	1	1	3	3	0	3	4	0	1	1	4	3	0	1	4	3
O00116	O00116	3	3	3	Alkyldihydroxyacetonephosphate synthase, peroxisomal	AGPS	sp|O00116|ADAS_HUMAN Alkyldihydroxyacetonephosphate synthase, peroxisomal OS=Homo sapiens OX=9606 GN=AGPS PE=1 SV=1	1	3	3	3	0	0	0	0	1	0	0	0	0	0	0	0	0	0	0	1	0	0	0	0	0	1	0	0	0	0	0	1	0	0	1	0	0	0	0	1	0	0
O00139-2;O00139-1;O00139-5;O00139;O00139-4	O00139-2;O00139-1;O00139-5;O00139;O00139-4	8;8;8;8;8	8;8;8;8;8	8;8;8;8;8	Kinesin-like protein KIF2A	KIF2A	sp|O00139-2|KIF2A_HUMAN Isoform 2 of Kinesin-like protein KIF2A OS=Homo sapiens OX=9606 GN=KIF2A;sp|O00139-1|KIF2A_HUMAN Isoform 1 of Kinesin-like protein KIF2A OS=Homo sapiens OX=9606 GN=KIF2A;sp|O00139-5|KIF2A_HUMAN Isoform 5 of Kinesin-like protein KIF2	5	8	8	8	2	5	5	5	4	8	5	6	2	6	5	4	4	6	4	5	5	6	6	5	3	6	5	5	7	6	5	6	6	5	6	6	4	6	5	5	5	6
O00154-6;O00154-4;O00154-7;O00154;O00154-2;O00154-3;O00154-5	O00154-6;O00154-4;O00154-7;O00154;O00154-2;O00154-3;O00154-5	8;8;8;8;7;7;7	8;8;8;8;7;7;7	8;8;8;8;7;7;7	Cytosolic acyl coenzyme A thioester hydrolase	ACOT7	sp|O00154-6|BACH_HUMAN Isoform 6 of Cytosolic acyl coenzyme A thioester hydrolase OS=Homo sapiens OX=9606 GN=ACOT7;sp|O00154-4|BACH_HUMAN Isoform 4 of Cytosolic acyl coenzyme A thioester hydrolase OS=Homo sapiens OX=9606 GN=ACOT7;sp|O00154-7|BACH_HUMAN Iso	7	8	8	8	5	5	3	6	4	5	5	5	4	4	4	5	4	5	5	3	5	4	5	4	3	5	4	4	4	4	5	5	5	4	6	5	4	4	3	5	5	4
O00159-2;O00159-3;O00159	O00159-2;O00159-3;O00159	6;6;6	6;6;6	6;6;6	Unconventional myosin-Ic	MYO1C	sp|O00159-2|MYO1C_HUMAN Isoform 2 of Unconventional myosin-Ic OS=Homo sapiens OX=9606 GN=MYO1C;sp|O00159-3|MYO1C_HUMAN Isoform 3 of Unconventional myosin-Ic OS=Homo sapiens OX=9606 GN=MYO1C;sp|O00159|MYO1C_HUMAN Unconventional myosin-Ic OS=Homo sapiens OX=	3	6	6	6	2	0	1	0	1	1	0	1	0	1	0	0	2	2	0	1	2	2	1	2	2	1	1	1	3	1	1	1	2	0	2	1	4	0	0	0	4	0
O00161;O00161-2	O00161;O00161-2	2;1	2;1	2;1	Synaptosomal-associated protein 23	SNAP23	sp|O00161|SNP23_HUMAN Synaptosomal-associated protein 23 OS=Homo sapiens OX=9606 GN=SNAP23 PE=1 SV=1;sp|O00161-2|SNP23_HUMAN Isoform SNAP-23b of Synaptosomal-associated protein 23 OS=Homo sapiens OX=9606 GN=SNAP23	2	2	2	2	0	0	1	1	0	1	0	1	0	1	1	1	0	1	1	1	0	0	1	1	0	0	1	1	0	1	1	1	1	1	1	1	0	1	1	1	0	0
O00165-5;O00165-3;O00165;O00165-2;O00165-4	O00165-5;O00165-3;O00165;O00165-2;O00165-4	2;2;2;2;1	2;2;2;2;1	2;2;2;2;1	HCLS1-associated protein X-1	HAX1	sp|O00165-5|HAX1_HUMAN Isoform 5 of HCLS1-associated protein X-1 OS=Homo sapiens OX=9606 GN=HAX1;sp|O00165-3|HAX1_HUMAN Isoform 3 of HCLS1-associated protein X-1 OS=Homo sapiens OX=9606 GN=HAX1;sp|O00165|HAX1_HUMAN HCLS1-associated protein X-1 OS=Homo sapi	5	2	2	2	0	0	1	2	0	0	1	2	0	1	1	0	1	0	1	2	0	0	1	2	0	0	1	2	1	1	2	2	1	1	2	1	0	0	1	1	1	0
O00170	O00170	3	3	3	AH receptor-interacting protein	AIP	sp|O00170|AIP_HUMAN AH receptor-interacting protein OS=Homo sapiens OX=9606 GN=AIP PE=1 SV=2	1	3	3	3	1	0	0	0	1	0	0	1	1	0	0	0	1	1	0	0	0	0	0	0	1	0	0	1	1	0	0	0	1	0	0	1	0	0	0	1	0	1
O00178	O00178	7	7	7	GTP-binding protein 1	GTPBP1	sp|O00178|GTPB1_HUMAN GTP-binding protein 1 OS=Homo sapiens OX=9606 GN=GTPBP1 PE=1 SV=3	1	7	7	7	1	0	0	0	0	0	0	0	0	1	2	0	0	1	0	1	1	1	1	1	0	1	0	0	3	0	1	1	1	1	1	1	1	1	1	0	1	1
O00186	O00186	3	3	3	Syntaxin-binding protein 3	STXBP3	sp|O00186|STXB3_HUMAN Syntaxin-binding protein 3 OS=Homo sapiens OX=9606 GN=STXBP3 PE=1 SV=2	1	3	3	3	2	1	1	2	2	1	1	1	1	1	1	0	2	2	3	0	1	2	1	1	1	2	1	0	2	1	1	1	1	1	2	2	1	1	1	1	1	1
O00192;O00192-2	O00192;O00192-2	8;7	8;7	8;7	Armadillo repeat protein deleted in velo-cardio-facial syndrome	ARVCF	sp|O00192|ARVC_HUMAN Armadillo repeat protein deleted in velo-cardio-facial syndrome OS=Homo sapiens OX=9606 GN=ARVCF PE=1 SV=1;sp|O00192-2|ARVC_HUMAN Isoform Short of Armadillo repeat protein deleted in velo-cardio-facial syndrome OS=Homo sapiens OX=9606	2	8	8	8	2	3	3	3	2	1	2	2	4	5	2	3	3	3	1	3	5	3	1	2	3	2	2	2	4	2	2	2	3	3	2	2	4	1	3	2	3	3
O00193	O00193	4	4	4	Small acidic protein	SMAP	sp|O00193|SMAP_HUMAN Small acidic protein OS=Homo sapiens OX=9606 GN=SMAP PE=1 SV=1	1	4	4	4	2	2	2	3	2	2	2	2	2	2	2	1	2	2	2	2	1	2	3	3	2	2	2	2	2	2	2	2	2	2	2	3	2	2	2	1	2	2
O00203-3;O00203	O00203-3;O00203	4;3	2;1	2;1	AP-3 complex subunit beta-1	AP3B1	sp|O00203-3|AP3B1_HUMAN Isoform 2 of AP-3 complex subunit beta-1 OS=Homo sapiens OX=9606 GN=AP3B1;sp|O00203|AP3B1_HUMAN AP-3 complex subunit beta-1 OS=Homo sapiens OX=9606 GN=AP3B1 PE=1 SV=3	2	4	2	2	1	1	1	1	1	1	1	0	1	1	1	1	2	1	0	2	1	1	1	1	1	2	2	1	1	2	2	1	1	2	1	1	1	1	1	0	1	2
O00206-3	O00206-3	1	1	1			sp|O00206-3|TLR4_HUMAN Isoform 3 of Toll-like receptor 4 OS=Homo sapiens OX=9606 GN=TLR4	1	1	1	1	0	1	0	0	1	0	0	0	0	1	0	0	1	0	0	0	0	1	0	0	1	0	0	0	1	1	0	0	0	1	0	0	1	1	0	0	0	1
O00213-4;O00213-6;O00213-3;O00213-5;O00213-2;O00213	O00213-4;O00213-6;O00213-3;O00213-5;O00213-2;O00213	1;1;1;1;1;1	1;1;1;1;1;1	1;1;1;1;1;1	Amyloid beta A4 precursor protein-binding family B member 1	APBB1	sp|O00213-4|APBB1_HUMAN Isoform 4 of Amyloid-beta A4 precursor protein-binding family B member 1 OS=Homo sapiens OX=9606 GN=APBB1;sp|O00213-6|APBB1_HUMAN Isoform 6 of Amyloid-beta A4 precursor protein-binding family B member 1 OS=Homo sapiens OX=9606 GN=AP	6	1	1	1	1	0	0	0	0	1	0	0	0	0	0	0	1	1	0	0	1	0	0	0	0	1	0	0	1	0	0	0	1	0	0	0	0	0	0	0	0	0
O00217	O00217	2	2	2	NADH dehydrogenase [ubiquinone] iron-sulfur protein 8, mitochondrial	NDUFS8	sp|O00217|NDUS8_HUMAN NADH dehydrogenase [ubiquinone] iron-sulfur protein 8, mitochondrial OS=Homo sapiens OX=9606 GN=NDUFS8 PE=1 SV=1	1	2	2	2	1	0	1	0	1	1	0	1	1	1	1	1	1	1	1	2	1	1	1	1	1	1	0	1	0	1	2	1	1	0	2	0	1	1	1	2	1	1
O00231;O00231-2	O00231;O00231-2	10;10	10;10	10;10	26S proteasome non-ATPase regulatory subunit 11	PSMD11	sp|O00231|PSD11_HUMAN 26S proteasome non-ATPase regulatory subunit 11 OS=Homo sapiens OX=9606 GN=PSMD11 PE=1 SV=3;sp|O00231-2|PSD11_HUMAN Isoform 2 of 26S proteasome non-ATPase regulatory subunit 11 OS=Homo sapiens OX=9606 GN=PSMD11	2	10	10	10	7	6	7	7	9	7	7	8	8	6	9	9	8	8	7	9	9	8	7	6	9	7	8	7	8	8	8	8	9	7	8	8	7	6	7	8	7	9
O00232;O00232-2	O00232;O00232-2	8;7	8;7	8;7	26S proteasome non-ATPase regulatory subunit 12	PSMD12	sp|O00232|PSD12_HUMAN 26S proteasome non-ATPase regulatory subunit 12 OS=Homo sapiens OX=9606 GN=PSMD12 PE=1 SV=3;sp|O00232-2|PSD12_HUMAN Isoform 2 of 26S proteasome non-ATPase regulatory subunit 12 OS=Homo sapiens OX=9606 GN=PSMD12	2	8	8	8	4	6	2	4	3	5	4	2	3	3	1	1	3	4	3	2	4	3	2	3	4	3	4	2	4	4	2	2	3	4	4	5	3	3	3	4	4	0
O00233-3;O00233	O00233-3;O00233	1;1	1;1	1;1	26S proteasome non-ATPase regulatory subunit 9	PSMD9	sp|O00233-3|PSMD9_HUMAN Isoform 3 of 26S proteasome non-ATPase regulatory subunit 9 OS=Homo sapiens OX=9606 GN=PSMD9;sp|O00233|PSMD9_HUMAN 26S proteasome non-ATPase regulatory subunit 9 OS=Homo sapiens OX=9606 GN=PSMD9 PE=1 SV=3	2	1	1	1	0	1	1	1	1	0	1	1	0	1	1	1	0	1	1	1	0	0	1	1	0	0	1	1	0	0	1	1	0	1	1	1	0	0	1	1	0	0
O00258-2;O00258	O00258-2;O00258	2;2	2;2	2;2	Tail-anchored protein insertion receptor WRB	WRB	sp|O00258-2|GET1_HUMAN Isoform 2 of Guided entry of tail-anchored proteins factor 1 OS=Homo sapiens OX=9606 GN=GET1;sp|O00258|GET1_HUMAN Guided entry of tail-anchored proteins factor 1 OS=Homo sapiens OX=9606 GN=GET1 PE=1 SV=2	2	2	2	2	0	0	0	0	0	0	1	1	1	1	0	0	1	0	2	1	0	1	1	0	0	0	1	1	0	1	0	1	1	0	0	1	0	0	1	1	0	0
O00267-2;O00267	O00267-2;O00267	14;14	14;14	14;14	Transcription elongation factor SPT5	SUPT5H	sp|O00267-2|SPT5H_HUMAN Isoform 2 of Transcription elongation factor SPT5 OS=Homo sapiens OX=9606 GN=SUPT5H;sp|O00267|SPT5H_HUMAN Transcription elongation factor SPT5 OS=Homo sapiens OX=9606 GN=SUPT5H PE=1 SV=1	2	14	14	14	2	3	4	2	5	2	0	3	2	0	0	3	3	4	0	2	1	3	2	0	4	2	1	0	4	5	2	3	3	2	2	3	4	4	1	1	1	1
O00291-3;O00291-4;O00291	O00291-3;O00291-4;O00291	2;2;2	2;2;2	2;2;2	Huntingtin-interacting protein 1	HIP1	sp|O00291-3|HIP1_HUMAN Isoform 3 of Huntingtin-interacting protein 1 OS=Homo sapiens OX=9606 GN=HIP1;sp|O00291-4|HIP1_HUMAN Isoform 4 of Huntingtin-interacting protein 1 OS=Homo sapiens OX=9606 GN=HIP1;sp|O00291|HIP1_HUMAN Huntingtin-interacting protein 1	3	2	2	2	0	1	1	0	1	1	0	1	2	1	0	0	1	1	0	0	1	1	0	0	1	1	0	0	1	1	0	1	0	1	1	1	1	1	1	0	1	1
O00294-2;O00294	O00294-2;O00294	1;1	1;1	1;1	Tubby-related protein 1	TULP1	sp|O00294-2|TULP1_HUMAN Isoform 2 of Tubby-related protein 1 OS=Homo sapiens OX=9606 GN=TULP1;sp|O00294|TULP1_HUMAN Tubby-related protein 1 OS=Homo sapiens OX=9606 GN=TULP1 PE=1 SV=3	2	1	1	1	0	0	1	0	1	0	0	0	0	0	0	0	0	0	0	0	0	0	0	0	0	0	0	0	1	0	0	0	0	1	0	0	0	0	0	0	0	0
O00299;Q29238	O00299	8;3	8;3	8;3	Chloride intracellular channel protein 1	CLIC1	sp|O00299|CLIC1_HUMAN Chloride intracellular channel protein 1 OS=Homo sapiens OX=9606 GN=CLIC1 PE=1 SV=4	2	8	8	8	2	5	4	4	4	4	4	4	4	4	5	5	5	4	4	4	4	4	3	4	4	5	5	5	4	5	4	4	4	3	4	5	4	5	6	4	4	5
O00303	O00303	7	7	7	Eukaryotic translation initiation factor 3 subunit F	EIF3F	sp|O00303|EIF3F_HUMAN Eukaryotic translation initiation factor 3 subunit F OS=Homo sapiens OX=9606 GN=EIF3F PE=1 SV=1	1	7	7	7	1	3	1	2	2	3	2	3	1	3	2	2	2	2	2	2	3	2	3	3	1	2	1	3	2	3	2	4	2	3	3	3	2	4	3	1	2	3
O00330;O00330-3;O00330-2	O00330;O00330-3	3;3;1	3;3;1	3;3;1	Pyruvate dehydrogenase protein X component, mitochondrial	PDHX	sp|O00330|ODPX_HUMAN Pyruvate dehydrogenase protein X component, mitochondrial OS=Homo sapiens OX=9606 GN=PDHX PE=1 SV=3;sp|O00330-3|ODPX_HUMAN Isoform 3 of Pyruvate dehydrogenase protein X component, mitochondrial OS=Homo sapiens OX=9606 GN=PDHX	3	3	3	3	2	1	2	2	2	1	3	1	1	1	2	2	2	2	2	0	3	2	2	1	1	1	2	3	1	2	2	3	1	2	2	3	2	1	3	1	2	1
O00399	O00399	2	2	2	Dynactin subunit 6	DCTN6	sp|O00399|DCTN6_HUMAN Dynactin subunit 6 OS=Homo sapiens OX=9606 GN=DCTN6 PE=1 SV=1	1	2	2	2	2	1	0	0	1	1	0	1	2	1	0	0	1	1	0	1	0	1	1	2	2	1	0	1	2	1	0	1	2	0	1	1	1	2	0	0	2	1
O00401	O00401	2	2	2	Neural Wiskott-Aldrich syndrome protein	WASL	sp|O00401|WASL_HUMAN Neural Wiskott-Aldrich syndrome protein OS=Homo sapiens OX=9606 GN=WASL PE=1 SV=2	1	2	2	2	0	0	0	1	1	0	0	1	0	1	0	0	1	0	0	1	1	0	0	1	1	0	0	2	0	0	0	0	0	0	0	0	0	0	0	0	0	0
O00410;O00410-3;O00410-2	O00410;O00410-3;O00410-2	25;24;22	25;24;22	23;22;20	Importin-5	IPO5	sp|O00410|IPO5_HUMAN Importin-5 OS=Homo sapiens OX=9606 GN=IPO5 PE=1 SV=4;sp|O00410-3|IPO5_HUMAN Isoform 3 of Importin-5 OS=Homo sapiens OX=9606 GN=IPO5;sp|O00410-2|IPO5_HUMAN Isoform 2 of Importin-5 OS=Homo sapiens OX=9606 GN=IPO5	3	25	25	23	11	10	9	10	11	11	11	10	13	12	9	9	12	13	7	10	13	11	12	11	14	11	8	12	12	12	12	12	15	11	11	12	15	11	11	9	12	12
O00423;O00423-3	O00423;O00423-3	3;3	3;3	3;3	Echinoderm microtubule-associated protein-like 1	EML1	sp|O00423|EMAL1_HUMAN Echinoderm microtubule-associated protein-like 1 OS=Homo sapiens OX=9606 GN=EML1 PE=1 SV=3;sp|O00423-3|EMAL1_HUMAN Isoform 3 of Echinoderm microtubule-associated protein-like 1 OS=Homo sapiens OX=9606 GN=EML1	2	3	3	3	0	0	1	0	0	0	1	1	0	1	0	0	1	0	0	1	1	1	1	1	1	1	1	2	0	0	1	1	0	0	1	1	0	0	0	0	0	0
O00425;O00425-2	O00425;O00425-2	3;2	2;1	2;1	Insulin-like growth factor 2 mRNA-binding protein 3	IGF2BP3	sp|O00425|IF2B3_HUMAN Insulin-like growth factor 2 mRNA-binding protein 3 OS=Homo sapiens OX=9606 GN=IGF2BP3 PE=1 SV=2;sp|O00425-2|IF2B3_HUMAN Isoform 2 of Insulin-like growth factor 2 mRNA-binding protein 3 OS=Homo sapiens OX=9606 GN=IGF2BP3	2	3	2	2	2	1	0	1	2	1	1	1	2	1	0	1	2	1	1	1	1	1	1	1	2	1	1	1	1	1	1	1	1	1	1	1	2	1	0	1	2	1
O00429-2;O00429-8;O00429-4;O00429-9;O00429;O00429-6;O00429-5;O00429-3;O00429-7	O00429-2;O00429-8;O00429-4;O00429-9;O00429;O00429-6;O00429-5;O00429-3;O00429-7	25;25;24;24;24;24;23;23;18	25;25;24;24;24;24;23;23;18	25;25;24;24;24;24;23;23;18	Dynamin-1-like protein	DNM1L	sp|O00429-2|DNM1L_HUMAN Isoform 4 of Dynamin-1-like protein OS=Homo sapiens OX=9606 GN=DNM1L;sp|O00429-8|DNM1L_HUMAN Isoform 8 of Dynamin-1-like protein OS=Homo sapiens OX=9606 GN=DNM1L;sp|O00429-4|DNM1L_HUMAN Isoform 3 of Dynamin-1-like protein OS=Homo sa	9	25	25	25	13	10	11	12	15	14	15	9	10	11	14	12	15	14	11	13	15	13	10	12	16	11	13	9	13	12	11	15	16	12	14	16	10	12	14	10	11	10
O00442;O00442-2	O00442;O00442-2	4;4	4;4	4;4	RNA 3-terminal phosphate cyclase	RTCA	sp|O00442|RTCA_HUMAN RNA 3-terminal phosphate cyclase OS=Homo sapiens OX=9606 GN=RTCA PE=1 SV=1;sp|O00442-2|RTCA_HUMAN Isoform 2 of RNA 3-terminal phosphate cyclase OS=Homo sapiens OX=9606 GN=RTCA	2	4	4	4	2	2	2	3	1	2	2	2	2	2	2	3	1	3	2	2	2	2	2	2	1	2	2	1	1	2	2	2	2	2	3	3	3	2	2	2	2	2
O00443;O00443-2	O00443;O00443-2	3;2	3;2	3;2	Phosphatidylinositol 4-phosphate 3-kinase C2 domain-containing subunit alpha	PIK3C2A	sp|O00443|P3C2A_HUMAN Phosphatidylinositol 4-phosphate 3-kinase C2 domain-containing subunit alpha OS=Homo sapiens OX=9606 GN=PIK3C2A PE=1 SV=2;sp|O00443-2|P3C2A_HUMAN Isoform 2 of Phosphatidylinositol 4-phosphate 3-kinase C2 domain-containing subunit alph	2	3	3	3	0	1	0	0	1	2	0	0	0	0	0	0	1	2	0	0	1	1	0	0	2	0	0	0	1	1	0	0	1	1	0	0	1	0	0	0	1	0
O00468-6;O00468-3;O00468-5;O00468-4;O00468-7;O00468;O00468-2	O00468-6;O00468-3;O00468-5;O00468-4;O00468-7;O00468;O00468-2	2;2;2;2;2;2;1	2;2;2;2;2;2;1	2;2;2;2;2;2;1	Agrin;Agrin N-terminal 110 kDa subunit;Agrin C-terminal 110 kDa subunit;Agrin C-terminal 90 kDa fragment;Agrin C-terminal 22 kDa fragment	AGRN	sp|O00468-6|AGRIN_HUMAN Isoform 6 of Agrin OS=Homo sapiens OX=9606 GN=AGRN;sp|O00468-3|AGRIN_HUMAN Isoform 3 of Agrin OS=Homo sapiens OX=9606 GN=AGRN;sp|O00468-5|AGRIN_HUMAN Isoform 5 of Agrin OS=Homo sapiens OX=9606 GN=AGRN;sp|O00468-4|AGRIN_HUMAN Isoform	7	2	2	2	2	1	2	2	2	1	2	1	2	2	2	1	1	2	2	2	2	2	1	1	2	2	2	1	2	2	2	1	2	2	2	2	2	1	2	1	1	2
O00469-2;O00469;O00469-3	O00469-2;O00469	3;3;1	3;3;1	3;3;1	Procollagen-lysine,2-oxoglutarate 5-dioxygenase 2	PLOD2	sp|O00469-2|PLOD2_HUMAN Isoform 2 of Procollagen-lysine,2-oxoglutarate 5-dioxygenase 2 OS=Homo sapiens OX=9606 GN=PLOD2;sp|O00469|PLOD2_HUMAN Procollagen-lysine,2-oxoglutarate 5-dioxygenase 2 OS=Homo sapiens OX=9606 GN=PLOD2 PE=1 SV=2	3	3	3	3	2	1	1	2	0	1	1	1	2	3	2	2	1	1	1	1	1	3	1	2	2	2	3	2	2	0	3	2	1	0	2	1	3	3	2	2	1	1
O00470;O00470-2;O14770-6;O14770-7;O14770-8;O14770-3;O14770-2;O14770-4;O14770	O00470;O00470-2;O14770-6;O14770-7;O14770-8;O14770-3;O14770-2;O14770-4;O14770	2;2;1;1;1;1;1;1;1	2;2;1;1;1;1;1;1;1	2;2;1;1;1;1;1;1;1	Homeobox protein Meis1;Homeobox protein Meis2	MEIS1;MEIS2	sp|O00470|MEIS1_HUMAN Homeobox protein Meis1 OS=Homo sapiens OX=9606 GN=MEIS1 PE=1 SV=1;sp|O00470-2|MEIS1_HUMAN Isoform 2 of Homeobox protein Meis1 OS=Homo sapiens OX=9606 GN=MEIS1;sp|O14770-6|MEIS2_HUMAN Isoform 6 of Homeobox protein Meis2 OS=Homo sapiens	9	2	2	2	0	0	1	2	0	0	0	0	0	0	1	0	0	1	0	0	0	0	0	0	0	0	0	0	1	0	0	1	0	0	0	0	0	0	0	0	1	0
O00471	O00471	3	3	3	Exocyst complex component 5	EXOC5	sp|O00471|EXOC5_HUMAN Exocyst complex component 5 OS=Homo sapiens OX=9606 GN=EXOC5 PE=1 SV=1	1	3	3	3	0	0	0	0	1	0	0	0	1	0	0	0	0	0	0	0	0	0	0	0	0	0	0	0	0	0	0	0	0	0	0	0	0	0	0	0	0	0
O00483	O00483	1	1	1	Cytochrome c oxidase subunit NDUFA4	NDUFA4	sp|O00483|NDUA4_HUMAN Cytochrome c oxidase subunit NDUFA4 OS=Homo sapiens OX=9606 GN=NDUFA4 PE=1 SV=1	1	1	1	1	1	1	1	1	1	1	1	1	1	1	1	1	1	1	1	1	0	1	1	1	1	1	1	1	1	1	1	1	1	1	1	1	1	1	1	1	1	1
O00487	O00487	7	7	7	26S proteasome non-ATPase regulatory subunit 14	PSMD14	sp|O00487|PSDE_HUMAN 26S proteasome non-ATPase regulatory subunit 14 OS=Homo sapiens OX=9606 GN=PSMD14 PE=1 SV=1	1	7	7	7	1	1	1	1	3	1	0	2	2	3	4	3	3	2	2	1	3	2	2	1	3	3	1	3	2	2	2	1	4	1	2	1	3	3	2	2	3	4
O00499-3;O00499-5;O00499;O00499-9;O00499-10;O00499-7;O00499-8;O00499-4;O00499-6;O00499-11;O00499-2	O00499-3;O00499-5;O00499;O00499-9;O00499-10;O00499-7;O00499-8;O00499-4;O00499-6;O00499-11;O00499-2	13;13;13;12;12;12;12;12;12;12;12	13;13;13;12;12;12;12;12;12;12;12	13;13;13;12;12;12;12;12;12;12;12	Myc box-dependent-interacting protein 1	BIN1	sp|O00499-3|BIN1_HUMAN Isoform IIC1 of Myc box-dependent-interacting protein 1 OS=Homo sapiens OX=9606 GN=BIN1;sp|O00499-5|BIN1_HUMAN Isoform IID of Myc box-dependent-interacting protein 1 OS=Homo sapiens OX=9606 GN=BIN1;sp|O00499|BIN1_HUMAN Myc box-depend	11	13	13	13	7	8	10	7	8	7	9	7	5	8	7	7	9	8	8	7	7	6	7	6	10	7	9	5	9	6	8	7	8	6	7	8	8	7	6	7	8	8
O00505	O00505	7	7	6	Importin subunit alpha-4	KPNA3	sp|O00505|IMA4_HUMAN Importin subunit alpha-4 OS=Homo sapiens OX=9606 GN=KPNA3 PE=1 SV=2	1	7	7	6	2	4	4	2	1	3	2	2	2	2	3	3	3	4	4	3	2	4	2	3	3	4	3	2	2	3	3	2	3	2	3	4	2	3	2	2	3	1
O00533;O00533-2	O00533;O00533-2	7;7	7;7	7;7	Neural cell adhesion molecule L1-like protein;Processed neural cell adhesion molecule L1-like protein	CHL1	sp|O00533|NCHL1_HUMAN Neural cell adhesion molecule L1-like protein OS=Homo sapiens OX=9606 GN=CHL1 PE=1 SV=4;sp|O00533-2|NCHL1_HUMAN Isoform 2 of Neural cell adhesion molecule L1-like protein OS=Homo sapiens OX=9606 GN=CHL1	2	7	7	7	2	2	1	1	3	1	2	2	1	1	1	2	3	1	2	2	3	1	2	2	2	1	3	3	3	1	0	4	2	1	2	2	2	2	1	1	1	2
O00555-5;O00555-3;O00555-2;O00555-6;O00555-4;O00555	O00555-5;O00555-3;O00555-2;O00555-6;O00555-4;O00555	1;1;1;1;1;1	1;1;1;1;1;1	1;1;1;1;1;1	Voltage-dependent P/Q-type calcium channel subunit alpha-1A	CACNA1A	sp|O00555-5|CAC1A_HUMAN Isoform 5 of Voltage-dependent P/Q-type calcium channel subunit alpha-1A OS=Homo sapiens OX=9606 GN=CACNA1A;sp|O00555-3|CAC1A_HUMAN Isoform 3 of Voltage-dependent P/Q-type calcium channel subunit alpha-1A OS=Homo sapiens OX=9606 GN=	6	1	1	1	0	1	0	0	0	0	0	0	0	0	0	0	0	0	1	0	0	0	0	0	0	0	0	0	0	1	1	0	0	0	0	1	0	0	0	0	0	0
O00560-3;O00560-2;O00560	O00560-3;O00560-2;O00560	2;2;2	2;2;2	2;2;2	Syntenin-1	SDCBP	sp|O00560-3|SDCB1_HUMAN Isoform 3 of Syntenin-1 OS=Homo sapiens OX=9606 GN=SDCBP;sp|O00560-2|SDCB1_HUMAN Isoform 2 of Syntenin-1 OS=Homo sapiens OX=9606 GN=SDCBP;sp|O00560|SDCB1_HUMAN Syntenin-1 OS=Homo sapiens OX=9606 GN=SDCBP PE=1 SV=1	3	2	2	2	1	0	0	0	0	0	0	0	1	0	0	0	0	0	0	0	1	0	0	0	0	0	0	0	0	0	0	0	0	0	0	0	0	1	0	0	1	2
O00562-2;O00562	O00562-2;O00562	9;9	9;9	9;9	Membrane-associated phosphatidylinositol transfer protein 1	PITPNM1	sp|O00562-2|PITM1_HUMAN Isoform 2 of Membrane-associated phosphatidylinositol transfer protein 1 OS=Homo sapiens OX=9606 GN=PITPNM1;sp|O00562|PITM1_HUMAN Membrane-associated phosphatidylinositol transfer protein 1 OS=Homo sapiens OX=9606 GN=PITPNM1 PE=1 SV	2	9	9	9	5	6	4	3	5	4	3	4	6	7	6	6	5	6	4	4	5	5	6	6	6	5	2	6	6	3	4	6	6	4	4	5	6	4	6	4	5	2
O00567	O00567	5	5	5	Nucleolar protein 56	NOP56	sp|O00567|NOP56_HUMAN Nucleolar protein 56 OS=Homo sapiens OX=9606 GN=NOP56 PE=1 SV=4	1	5	5	5	1	1	1	2	1	2	2	1	1	1	0	1	2	2	0	0	1	0	1	1	1	1	0	1	2	1	1	1	2	0	2	1	3	1	0	0	2	2
O00571;O00571-2;O15523-3	O00571;O00571-2	12;11;2	11;10;2	4;3;0	ATP-dependent RNA helicase DDX3X	DDX3X	sp|O00571|DDX3X_HUMAN ATP-dependent RNA helicase DDX3X OS=Homo sapiens OX=9606 GN=DDX3X PE=1 SV=3;sp|O00571-2|DDX3X_HUMAN Isoform 2 of ATP-dependent RNA helicase DDX3X OS=Homo sapiens OX=9606 GN=DDX3X	3	12	11	4	8	8	8	8	9	9	8	8	9	6	9	8	8	6	8	7	9	9	8	8	10	10	9	8	12	8	8	9	8	7	9	8	8	8	10	9	7	8
O00629	O00629	6	5	5	Importin subunit alpha-3	KPNA4	sp|O00629|IMA3_HUMAN Importin subunit alpha-3 OS=Homo sapiens OX=9606 GN=KPNA4 PE=1 SV=1	1	6	5	5	4	4	3	3	2	2	2	3	3	3	2	3	3	4	3	3	3	4	2	4	3	4	2	4	5	3	2	3	4	2	3	2	4	3	2	3	4	2
O00712;O00712-4;O00712-5;O00712-6	O00712;O00712-4;O00712-5	3;3;3;1	3;3;3;1	3;3;3;1	Nuclear factor 1 B-type	NFIB	sp|O00712|NFIB_HUMAN Nuclear factor 1 B-type OS=Homo sapiens OX=9606 GN=NFIB PE=1 SV=2;sp|O00712-4|NFIB_HUMAN Isoform 4 of Nuclear factor 1 B-type OS=Homo sapiens OX=9606 GN=NFIB;sp|O00712-5|NFIB_HUMAN Isoform 5 of Nuclear factor 1 B-type OS=Homo sapiens O	4	3	3	3	0	0	0	0	0	0	0	0	0	0	0	0	1	0	0	0	0	0	0	0	1	0	0	0	1	0	0	0	0	0	0	0	0	0	0	0	0	0
O00743-3;O00743;O00743-2	O00743-3;O00743;O00743-2	6;6;5	6;6;5	6;6;5	Serine/threonine-protein phosphatase 6 catalytic subunit;Serine/threonine-protein phosphatase 6 catalytic subunit, N-terminally processed	PPP6C	sp|O00743-3|PPP6_HUMAN Isoform 3 of Serine/threonine-protein phosphatase 6 catalytic subunit OS=Homo sapiens OX=9606 GN=PPP6C;sp|O00743|PPP6_HUMAN Serine/threonine-protein phosphatase 6 catalytic subunit OS=Homo sapiens OX=9606 GN=PPP6C PE=1 SV=1;sp|O00743	3	6	6	6	1	2	3	1	2	2	1	1	2	2	1	2	3	2	1	1	2	3	2	1	1	2	2	0	2	1	2	1	2	1	2	3	1	3	3	3	2	3
O02668;CON__Q9TRI1	O02668	9;3	9;3	6;0			sp|O02668|ITIH2_PIG Inter-alpha-trypsin inhibitor heavy chain H2 OS=Sus scrofa OX=9823 GN=ITIH2 PE=2 SV=1	2	9	9	6	1	2	1	2	3	4	5	5	0	1	0	0	1	1	2	1	0	0	0	0	0	1	1	1	0	0	0	0	3	1	5	5	2	4	2	4	1	3
O02705;P07900;P07900-2;Q14568;Q58FG0;Q58FG1	O02705;P07900;P07900-2	36;34;34;6;3;1	36;34;34;6;3;1	25;23;23;2;2;0	Heat shock protein HSP 90-alpha	HSP90AA1	sp|O02705|HS90A_PIG Heat shock protein HSP 90-alpha OS=Sus scrofa OX=9823 GN=HSP90AA1 PE=2 SV=3;sp|P07900|HS90A_HUMAN Heat shock protein HSP 90-alpha OS=Homo sapiens OX=9606 GN=HSP90AA1 PE=1 SV=5;sp|P07900-2|HS90A_HUMAN Isoform 2 of Heat shock protein HSP	6	36	36	25	24	26	25	26	25	26	25	24	24	27	27	24	23	25	26	24	26	26	26	25	26	27	25	25	26	24	27	27	25	26	29	30	26	24	27	28	28	29
O02772	O02772	2	2	2			sp|O02772|FABPH_PIG Fatty acid-binding protein, heart OS=Sus scrofa OX=9823 GN=FABP3 PE=2 SV=3	1	2	2	2	1	1	2	0	1	1	2	1	1	2	2	0	2	2	2	1	1	1	2	0	2	2	2	1	2	2	2	1	1	2	1	2	2	1	1	1	2	1
O02799;P52630-4;P52630	O02799	9;1;1	9;1;1	9;1;1			sp|O02799|STAT2_PIG Signal transducer and activator of transcription 2 OS=Sus scrofa OX=9823 GN=STAT2 PE=2 SV=1	3	9	9	9	2	2	2	2	3	3	2	1	3	2	2	1	1	3	2	2	2	3	2	2	3	2	2	2	2	2	2	2	4	2	3	4	4	3	3	3	5	3
O13010;P48426-2;P48426	O13010;P48426-2;P48426	5;5;5	3;3;3	3;3;3	Phosphatidylinositol 5-phosphate 4-kinase type-2 alpha	PIP4K2A	sp|O13010|PI42A_PIG Phosphatidylinositol 5-phosphate 4-kinase type-2 alpha OS=Sus scrofa OX=9823 GN=PIP4K2A PE=2 SV=1;sp|P48426-2|PI42A_HUMAN Isoform 2 of Phosphatidylinositol 5-phosphate 4-kinase type-2 alpha OS=Homo sapiens OX=9606 GN=PIP4K2A;sp|P48426|P	3	5	3	3	2	2	2	3	2	2	2	2	1	2	2	3	2	3	1	3	2	2	2	3	2	2	2	2	2	2	2	3	2	1	2	3	1	2	2	2	1	2
O14490-7;O14490;O14490-3;O14490-5;O14490-2;O14490-4;O14490-6	O14490-7;O14490;O14490-3;O14490-5;O14490-2;O14490-4;O14490-6	2;2;1;1;1;1;1	2;2;1;1;1;1;1	2;2;1;1;1;1;1	Disks large-associated protein 1	DLGAP1	sp|O14490-7|DLGP1_HUMAN Isoform 7 of Disks large-associated protein 1 OS=Homo sapiens OX=9606 GN=DLGAP1;sp|O14490|DLGP1_HUMAN Disks large-associated protein 1 OS=Homo sapiens OX=9606 GN=DLGAP1 PE=1 SV=1;sp|O14490-3|DLGP1_HUMAN Isoform 3 of Disks large-asso	7	2	2	2	0	0	0	0	0	0	0	0	0	0	0	0	1	0	0	0	2	0	0	0	0	0	0	0	1	0	0	0	1	0	0	0	0	0	0	0	0	0
P60588;O14494;O14494-2	P60588;O14494;O14494-2	1;1;1	1;1;1	1;1;1	Lipid phosphate phosphohydrolase 1	PPAP2A	sp|P60588|PLPP1_PIG Phospholipid phosphatase 1 OS=Sus scrofa OX=9823 GN=PLPP1 PE=1 SV=2;sp|O14494|PLPP1_HUMAN Phospholipid phosphatase 1 OS=Homo sapiens OX=9606 GN=PLPP1 PE=1 SV=1;sp|O14494-2|PLPP1_HUMAN Isoform 2 of Phospholipid phosphatase 1 OS=Homo sapi	3	1	1	1	1	0	0	0	1	0	0	0	0	0	0	0	1	0	0	0	1	0	0	0	0	0	0	0	0	0	0	0	0	0	0	1	1	0	0	1	0	0
O14495	O14495	1	1	1	Lipid phosphate phosphohydrolase 3	PPAP2B	sp|O14495|PLPP3_HUMAN Phospholipid phosphatase 3 OS=Homo sapiens OX=9606 GN=PLPP3 PE=1 SV=1	1	1	1	1	0	0	1	0	0	0	1	0	0	1	1	0	0	0	1	1	0	0	0	1	0	0	1	1	0	0	1	1	0	1	1	1	0	0	1	1	0	0
O14497;O14497-3;O14497-2	O14497;O14497-3;O14497-2	10;9;9	10;9;9	8;7;7	AT-rich interactive domain-containing protein 1A	ARID1A	sp|O14497|ARI1A_HUMAN AT-rich interactive domain-containing protein 1A OS=Homo sapiens OX=9606 GN=ARID1A PE=1 SV=3;sp|O14497-3|ARI1A_HUMAN Isoform 3 of AT-rich interactive domain-containing protein 1A OS=Homo sapiens OX=9606 GN=ARID1A;sp|O14497-2|ARI1A_HUM	3	10	10	8	4	5	4	3	3	3	3	2	2	3	1	3	5	3	2	4	2	6	2	3	3	3	2	4	5	3	3	2	4	2	4	5	3	2	3	3	4	3
O14523;O14523-2	O14523;O14523-2	1;1	1;1	1;1	C2 domain-containing protein 2-like	C2CD2L	sp|O14523|C2C2L_HUMAN Phospholipid transfer protein C2CD2L OS=Homo sapiens OX=9606 GN=C2CD2L PE=1 SV=3;sp|O14523-2|C2C2L_HUMAN Isoform 2 of Phospholipid transfer protein C2CD2L OS=Homo sapiens OX=9606 GN=C2CD2L	2	1	1	1	1	1	1	1	1	1	1	0	1	1	1	0	1	1	1	0	1	1	0	1	1	1	1	1	1	1	0	0	1	1	0	0	1	1	1	0	1	1
O14531	O14531	4	4	4	Dihydropyrimidinase-related protein 4	DPYSL4	sp|O14531|DPYL4_HUMAN Dihydropyrimidinase-related protein 4 OS=Homo sapiens OX=9606 GN=DPYSL4 PE=1 SV=2	1	4	4	4	3	2	3	4	3	2	3	4	3	3	3	3	3	2	4	4	3	2	4	4	3	2	4	4	4	3	3	4	4	3	4	3	3	2	2	4	3	3
O14556	O14556	2	1	1	Glyceraldehyde-3-phosphate dehydrogenase, testis-specific	GAPDHS	sp|O14556|G3PT_HUMAN Glyceraldehyde-3-phosphate dehydrogenase, testis-specific OS=Homo sapiens OX=9606 GN=GAPDHS PE=1 SV=2	1	2	1	1	2	2	2	2	2	2	2	2	2	2	2	1	2	2	2	2	2	2	2	1	2	2	2	1	2	2	2	1	2	2	1	2	2	2	2	2	2	2
O14558	O14558	2	2	2	Heat shock protein beta-6	HSPB6	sp|O14558|HSPB6_HUMAN Heat shock protein beta-6 OS=Homo sapiens OX=9606 GN=HSPB6 PE=1 SV=2	1	2	2	2	1	0	0	1	1	1	0	0	0	0	1	0	0	1	0	0	1	1	0	1	0	0	1	0	1	1	0	1	1	1	1	0	1	1	1	1	1	0
O14561	O14561	2	2	2	Acyl carrier protein, mitochondrial	NDUFAB1	sp|O14561|ACPM_HUMAN Acyl carrier protein, mitochondrial OS=Homo sapiens OX=9606 GN=NDUFAB1 PE=1 SV=3	1	2	2	2	1	1	0	0	0	1	0	0	1	1	0	0	0	1	1	0	0	0	1	0	0	0	0	0	0	0	0	0	0	0	0	0	0	0	1	0	0	0
O14562	O14562	1	1	1	Ubiquitin domain-containing protein UBFD1	UBFD1	sp|O14562|UBFD1_HUMAN Ubiquitin domain-containing protein UBFD1 OS=Homo sapiens OX=9606 GN=UBFD1 PE=1 SV=2	1	1	1	1	1	1	1	1	1	1	1	1	1	1	1	1	1	1	1	1	0	0	1	1	1	1	1	1	1	1	1	1	1	1	1	1	1	1	1	1	1	1
O14576-2;O14576-4;O14576-3;O14576;O14576-5	O14576-2;O14576-4;O14576-3;O14576;O14576-5	6;5;5;5;4	6;5;5;5;4	6;5;5;5;4	Cytoplasmic dynein 1 intermediate chain 1	DYNC1I1	sp|O14576-2|DC1I1_HUMAN Isoform 2 of Cytoplasmic dynein 1 intermediate chain 1 OS=Homo sapiens OX=9606 GN=DYNC1I1;sp|O14576-4|DC1I1_HUMAN Isoform 4 of Cytoplasmic dynein 1 intermediate chain 1 OS=Homo sapiens OX=9606 GN=DYNC1I1;sp|O14576-3|DC1I1_HUMAN Isof	5	6	6	6	2	1	2	1	2	1	2	3	1	1	2	1	1	2	1	1	1	1	1	2	1	1	2	2	2	1	0	3	2	1	3	2	2	2	2	1	2	3
O14579;O14579-2;O14579-3	O14579;O14579-2;O14579-3	3;3;2	3;3;2	3;3;2	Coatomer subunit epsilon	COPE	sp|O14579|COPE_HUMAN Coatomer subunit epsilon OS=Homo sapiens OX=9606 GN=COPE PE=1 SV=3;sp|O14579-2|COPE_HUMAN Isoform 2 of Coatomer subunit epsilon OS=Homo sapiens OX=9606 GN=COPE;sp|O14579-3|COPE_HUMAN Isoform 3 of Coatomer subunit epsilon OS=Homo sapien	3	3	3	3	3	2	2	2	2	2	2	2	3	2	2	2	3	3	2	1	2	3	2	2	1	1	1	1	2	2	1	2	3	3	2	2	2	3	2	2	3	3
P47813;O14602	P47813;O14602	2;2	2;2	2;2	Eukaryotic translation initiation factor 1A, X-chromosomal;Eukaryotic translation initiation factor 1A, Y-chromosomal	EIF1AX;EIF1AY	sp|P47813|IF1AX_HUMAN Eukaryotic translation initiation factor 1A, X-chromosomal OS=Homo sapiens OX=9606 GN=EIF1AX PE=1 SV=2;sp|O14602|IF1AY_HUMAN Eukaryotic translation initiation factor 1A, Y-chromosomal OS=Homo sapiens OX=9606 GN=EIF1AY PE=1 SV=4	2	2	2	2	0	1	1	0	0	0	1	0	0	0	0	0	0	0	0	0	0	0	0	0	0	0	1	0	1	0	0	0	0	1	1	1	1	0	1	1	0	0
O14617;O14617-5;O14617-4;O14617-2;O14617-3	O14617;O14617-5;O14617-4;O14617-2	11;11;10;6;5	11;11;10;6;5	11;11;10;6;5	AP-3 complex subunit delta-1	AP3D1	sp|O14617|AP3D1_HUMAN AP-3 complex subunit delta-1 OS=Homo sapiens OX=9606 GN=AP3D1 PE=1 SV=1;sp|O14617-5|AP3D1_HUMAN Isoform 5 of AP-3 complex subunit delta-1 OS=Homo sapiens OX=9606 GN=AP3D1;sp|O14617-4|AP3D1_HUMAN Isoform 4 of AP-3 complex subunit delta	5	11	11	11	6	5	6	5	4	5	6	4	5	8	6	5	5	7	6	7	6	5	6	5	7	6	6	5	6	4	6	6	7	4	5	7	7	4	5	5	4	7
O14639-2;O14639-6;O14639;O14639-4;O14639-3;O14639-5	O14639-2;O14639-6;O14639;O14639-4;O14639-3;O14639-5	4;4;4;2;2;2	4;4;4;2;2;2	4;4;4;2;2;2	Actin-binding LIM protein 1	ABLIM1	sp|O14639-2|ABLM1_HUMAN Isoform 2 of Actin-binding LIM protein 1 OS=Homo sapiens OX=9606 GN=ABLIM1;sp|O14639-6|ABLM1_HUMAN Isoform 6 of Actin-binding LIM protein 1 OS=Homo sapiens OX=9606 GN=ABLIM1;sp|O14639|ABLM1_HUMAN Actin-binding LIM protein 1 OS=Homo	6	4	4	4	2	2	1	0	0	1	1	0	2	0	0	0	1	2	1	2	0	3	1	1	2	1	2	1	1	2	2	0	1	2	2	2	1	1	1	1	1	1
O14641	O14641	1	1	1	Segment polarity protein dishevelled homolog DVL-2	DVL2	sp|O14641|DVL2_HUMAN Segment polarity protein dishevelled homolog DVL-2 OS=Homo sapiens OX=9606 GN=DVL2 PE=1 SV=1	1	1	1	1	0	1	0	0	1	0	0	0	0	0	0	0	0	0	0	0	0	0	0	0	1	0	0	0	1	0	0	0	0	0	0	0	0	1	0	0	0	0
O14647-2;O14647	O14647-2;O14647	5;5	4;4	3;3	Chromodomain-helicase-DNA-binding protein 2	CHD2	sp|O14647-2|CHD2_HUMAN Isoform 2 of Chromodomain-helicase-DNA-binding protein 2 OS=Homo sapiens OX=9606 GN=CHD2;sp|O14647|CHD2_HUMAN Chromodomain-helicase-DNA-binding protein 2 OS=Homo sapiens OX=9606 GN=CHD2 PE=1 SV=2	2	5	4	3	1	1	0	0	1	0	0	0	1	0	0	0	1	0	0	0	1	0	0	0	1	0	0	0	1	2	0	0	0	0	0	0	2	0	0	0	0	1
O14662-2;O14662-4;O14662-5;O14662;O14662-3;O14662-6	O14662-2;O14662-4;O14662-5;O14662;O14662-3;O14662-6	3;3;3;3;2;2	3;3;3;3;2;2	3;3;3;3;2;2	Syntaxin-16	STX16	sp|O14662-2|STX16_HUMAN Isoform A of Syntaxin-16 OS=Homo sapiens OX=9606 GN=STX16;sp|O14662-4|STX16_HUMAN Isoform D of Syntaxin-16 OS=Homo sapiens OX=9606 GN=STX16;sp|O14662-5|STX16_HUMAN Isoform E of Syntaxin-16 OS=Homo sapiens OX=9606 GN=STX16;sp|O14662|	6	3	3	3	1	0	1	1	1	1	1	0	1	1	0	0	3	1	2	0	1	1	0	1	1	1	2	1	1	1	1	1	1	1	2	1	1	1	1	1	2	1
O77633;O14672	O77633;O14672	1;1	1;1	1;1	Disintegrin and metalloproteinase domain-containing protein 10	ADAM10	sp|O77633|ADA10_PIG Disintegrin and metalloproteinase domain-containing protein 10 OS=Sus scrofa OX=9823 GN=ADAM10 PE=2 SV=2;sp|O14672|ADA10_HUMAN Disintegrin and metalloproteinase domain-containing protein 10 OS=Homo sapiens OX=9606 GN=ADAM10 PE=1 SV=1	2	1	1	1	0	0	0	0	0	0	0	0	0	0	0	0	0	0	0	0	0	0	0	0	0	0	0	0	0	0	0	0	0	0	0	0	0	0	0	0	0	0
O14733;O14733-4;O14733-3;O14733-2	O14733;O14733-4;O14733-3;O14733-2	3;3;3;3	3;3;3;3	3;3;3;3	Dual specificity mitogen-activated protein kinase kinase 7	MAP2K7	sp|O14733|MP2K7_HUMAN Dual specificity mitogen-activated protein kinase kinase 7 OS=Homo sapiens OX=9606 GN=MAP2K7 PE=1 SV=2;sp|O14733-4|MP2K7_HUMAN Isoform 4 of Dual specificity mitogen-activated protein kinase kinase 7 OS=Homo sapiens OX=9606 GN=MAP2K7;s	4	3	3	3	1	0	0	0	0	0	1	0	0	0	0	0	0	0	0	0	0	0	0	1	0	0	0	0	0	0	1	1	1	0	0	0	0	0	0	0	1	1
O14734	O14734	1	1	1	Acyl-coenzyme A thioesterase 8	ACOT8	sp|O14734|ACOT8_HUMAN Acyl-coenzyme A thioesterase 8 OS=Homo sapiens OX=9606 GN=ACOT8 PE=1 SV=1	1	1	1	1	1	0	1	1	0	0	1	0	0	1	0	0	1	1	0	1	0	0	0	0	0	0	1	1	1	1	1	1	0	1	1	1	0	0	1	1	0	0
O14735-3;O14735;O14735-2	O14735-3;O14735	5;4;1	5;4;1	5;4;1	CDP-diacylglycerol--inositol 3-phosphatidyltransferase	CDIPT	sp|O14735-3|CDIPT_HUMAN Isoform 3 of CDP-diacylglycerol--inositol 3-phosphatidyltransferase OS=Homo sapiens OX=9606 GN=CDIPT;sp|O14735|CDIPT_HUMAN CDP-diacylglycerol--inositol 3-phosphatidyltransferase OS=Homo sapiens OX=9606 GN=CDIPT PE=1 SV=1	3	5	5	5	3	3	3	3	3	3	2	2	3	3	2	1	3	3	3	2	3	3	3	2	3	3	2	3	3	3	3	3	3	2	3	2	3	3	3	2	3	3
O14737;O14737-2	O14737;O14737-2	3;3	3;3	3;3	Programmed cell death protein 5	PDCD5	sp|O14737|PDCD5_HUMAN Programmed cell death protein 5 OS=Homo sapiens OX=9606 GN=PDCD5 PE=1 SV=3;sp|O14737-2|PDCD5_HUMAN Isoform 2 of Programmed cell death protein 5 OS=Homo sapiens OX=9606 GN=PDCD5	2	3	3	3	1	2	1	2	1	2	1	2	0	1	2	1	1	1	1	1	0	2	2	1	1	2	1	2	2	2	2	1	2	2	1	2	2	1	1	1	2	1
O14744;O14744-5;O14744-2;O14744-4;O14744-3	O14744;O14744-5;O14744-2;O14744-4;O14744-3	9;8;8;7;7	9;8;8;7;7	9;8;8;7;7	Protein arginine N-methyltransferase 5;Protein arginine N-methyltransferase 5, N-terminally processed	PRMT5	sp|O14744|ANM5_HUMAN Protein arginine N-methyltransferase 5 OS=Homo sapiens OX=9606 GN=PRMT5 PE=1 SV=4;sp|O14744-5|ANM5_HUMAN Isoform 5 of Protein arginine N-methyltransferase 5 OS=Homo sapiens OX=9606 GN=PRMT5;sp|O14744-2|ANM5_HUMAN Isoform 2 of Protein a	5	9	9	9	5	1	3	3	4	3	3	5	5	5	3	3	3	2	4	4	4	2	3	2	4	3	3	4	4	3	3	3	4	2	3	5	3	4	3	3	5	4
O14775;O14775-3;O14775-2	O14775;O14775-3;O14775-2	5;4;4	5;4;4	5;4;4	Guanine nucleotide-binding protein subunit beta-5	GNB5	sp|O14775|GNB5_HUMAN Guanine nucleotide-binding protein subunit beta-5 OS=Homo sapiens OX=9606 GN=GNB5 PE=1 SV=2;sp|O14775-3|GNB5_HUMAN Isoform 3 of Guanine nucleotide-binding protein subunit beta-5 OS=Homo sapiens OX=9606 GN=GNB5;sp|O14775-2|GNB5_HUMAN Is	3	5	5	5	2	3	3	2	1	3	1	3	2	2	2	2	1	4	3	2	2	4	2	3	2	3	2	3	3	3	2	2	2	2	2	2	1	2	3	0	1	3
O14776-2;O14776	O14776-2;O14776	7;7	7;7	7;7	Transcription elongation regulator 1	TCERG1	sp|O14776-2|TCRG1_HUMAN Isoform 2 of Transcription elongation regulator 1 OS=Homo sapiens OX=9606 GN=TCERG1;sp|O14776|TCRG1_HUMAN Transcription elongation regulator 1 OS=Homo sapiens OX=9606 GN=TCERG1 PE=1 SV=2	2	7	7	7	2	3	1	4	2	2	4	2	1	3	2	3	1	2	4	4	1	2	3	4	2	2	3	3	2	1	3	4	1	2	5	5	2	2	1	3	2	0
O14787-2;O14787	O14787-2;O14787	10;9	7;7	7;7	Transportin-2	TNPO2	sp|O14787-2|TNPO2_HUMAN Isoform 2 of Transportin-2 OS=Homo sapiens OX=9606 GN=TNPO2;sp|O14787|TNPO2_HUMAN Transportin-2 OS=Homo sapiens OX=9606 GN=TNPO2 PE=1 SV=3	2	10	7	7	2	6	3	4	3	3	1	2	4	2	2	2	3	3	2	5	4	5	2	3	5	6	3	4	3	4	3	4	3	2	4	5	4	3	3	3	3	3
O14807	O14807	1	1	1	Ras-related protein M-Ras	MRAS	sp|O14807|RASM_HUMAN Ras-related protein M-Ras OS=Homo sapiens OX=9606 GN=MRAS PE=1 SV=2	1	1	1	1	1	1	1	1	1	1	1	1	1	1	1	1	1	1	1	1	1	1	1	1	1	1	1	1	1	0	1	1	1	1	1	1	1	1	1	1	1	1
O14810	O14810	2	2	2	Complexin-1	CPLX1	sp|O14810|CPLX1_HUMAN Complexin-1 OS=Homo sapiens OX=9606 GN=CPLX1 PE=1 SV=1	1	2	2	2	1	1	1	1	1	1	1	1	1	0	1	1	1	1	1	1	1	1	1	0	1	1	0	0	1	0	0	1	0	1	1	1	1	1	1	1	1	1
O14818;O14818-4;Q8TAA3-2;Q8TAA3-5;Q8TAA3;O14818-2	O14818;O14818-4;Q8TAA3-2;Q8TAA3-5;Q8TAA3;O14818-2	8;5;5;5;5;4	8;5;5;5;5;4	8;5;5;5;5;4	Proteasome subunit alpha type-7;Proteasome subunit alpha type-7-like	PSMA7;PSMA8	sp|O14818|PSA7_HUMAN Proteasome subunit alpha type-7 OS=Homo sapiens OX=9606 GN=PSMA7 PE=1 SV=1;sp|O14818-4|PSA7_HUMAN Isoform 3 of Proteasome subunit alpha type-7 OS=Homo sapiens OX=9606 GN=PSMA7;sp|Q8TAA3-2|PSMA8_HUMAN Isoform 2 of Proteasome subunit alp	6	8	8	8	3	2	4	3	2	2	3	3	3	4	4	4	3	3	4	3	3	4	3	4	2	2	3	3	4	2	4	3	3	3	5	5	4	4	4	4	4	3
O14828-2;O14828	O14828-2;O14828	2;2	2;2	2;2	Secretory carrier-associated membrane protein 3	SCAMP3	sp|O14828-2|SCAM3_HUMAN Isoform 2 of Secretory carrier-associated membrane protein 3 OS=Homo sapiens OX=9606 GN=SCAMP3;sp|O14828|SCAM3_HUMAN Secretory carrier-associated membrane protein 3 OS=Homo sapiens OX=9606 GN=SCAMP3 PE=1 SV=3	2	2	2	2	2	1	2	2	2	1	2	2	2	1	2	2	2	1	2	2	2	2	1	1	2	1	2	2	2	2	2	2	1	2	2	2	1	1	1	1	2	2
O14830	O14830	1	1	1	Serine/threonine-protein phosphatase with EF-hands 2	PPEF2	sp|O14830|PPE2_HUMAN Serine/threonine-protein phosphatase with EF-hands 2 OS=Homo sapiens OX=9606 GN=PPEF2 PE=1 SV=2	1	1	1	1	1	0	1	1	0	0	0	0	0	1	0	0	0	0	0	0	0	1	1	1	0	0	0	1	0	1	0	0	0	1	0	0	1	0	0	0	0	0
O14841	O14841	6	6	6	5-oxoprolinase	OPLAH	sp|O14841|OPLA_HUMAN 5-oxoprolinase OS=Homo sapiens OX=9606 GN=OPLAH PE=1 SV=3	1	6	6	6	1	0	1	1	0	0	0	1	0	0	1	1	1	0	0	2	0	0	0	1	1	0	1	1	1	2	0	2	2	0	1	2	1	1	1	0	1	1
O14874-2;O14874-3;O14874	O14874-2;O14874-3;O14874	5;5;5	5;5;5	5;5;5	[3-methyl-2-oxobutanoate dehydrogenase [lipoamide]] kinase, mitochondrial	BCKDK	sp|O14874-2|BCKD_HUMAN Isoform 2 of [3-methyl-2-oxobutanoate dehydrogenase [lipoamide]] kinase, mitochondrial OS=Homo sapiens OX=9606 GN=BCKDK;sp|O14874-3|BCKD_HUMAN Isoform 3 of [3-methyl-2-oxobutanoate dehydrogenase [lipoamide]] kinase, mitochondrial OS=	3	5	5	5	1	1	1	1	1	1	1	2	1	2	1	1	1	1	2	1	1	1	1	2	1	1	1	2	1	1	1	2	1	1	1	1	1	1	1	2	1	1
O14880	O14880	1	1	1	Microsomal glutathione S-transferase 3	MGST3	sp|O14880|MGST3_HUMAN Microsomal glutathione S-transferase 3 OS=Homo sapiens OX=9606 GN=MGST3 PE=1 SV=1	1	1	1	1	1	1	1	0	1	1	1	1	1	1	1	1	1	1	1	1	1	1	1	1	1	1	1	0	1	1	1	1	0	1	1	1	1	1	1	1	1	0
O14893-3;O14893-2;O14893	O14893-3;O14893-2;O14893	1;1;1	1;1;1	1;1;1	Gem-associated protein 2	GEMIN2	sp|O14893-3|GEMI2_HUMAN Isoform 3 of Gem-associated protein 2 OS=Homo sapiens OX=9606 GN=GEMIN2;sp|O14893-2|GEMI2_HUMAN Isoform 2 of Gem-associated protein 2 OS=Homo sapiens OX=9606 GN=GEMIN2;sp|O14893|GEMI2_HUMAN Gem-associated protein 2 OS=Homo sapiens O	3	1	1	1	0	0	0	0	1	1	1	0	0	0	0	0	0	0	0	0	1	0	0	0	1	1	0	0	0	1	0	0	0	1	0	1	0	0	0	0	1	0
O14907	O14907	1	1	1	Tax1-binding protein 3	TAX1BP3	sp|O14907|TX1B3_HUMAN Tax1-binding protein 3 OS=Homo sapiens OX=9606 GN=TAX1BP3 PE=1 SV=2	1	1	1	1	0	0	0	0	0	0	0	0	0	0	0	0	0	0	0	0	1	0	0	0	0	0	0	0	0	0	0	0	1	0	0	0	0	1	0	0	0	0
O14908-2;O14908;Q8TF64	O14908-2;O14908	3;3;1	3;3;1	3;3;1	PDZ domain-containing protein GIPC1	GIPC1	sp|O14908-2|GIPC1_HUMAN Isoform 2 of PDZ domain-containing protein GIPC1 OS=Homo sapiens OX=9606 GN=GIPC1;sp|O14908|GIPC1_HUMAN PDZ domain-containing protein GIPC1 OS=Homo sapiens OX=9606 GN=GIPC1 PE=1 SV=2	3	3	3	3	2	1	3	1	1	3	2	0	0	2	1	1	1	1	1	2	0	2	1	1	2	2	1	2	3	2	2	2	2	3	2	2	1	0	0	0	2	1
O14910	O14910	5	5	3	Protein lin-7 homolog A	LIN7A	sp|O14910|LIN7A_HUMAN Protein lin-7 homolog A OS=Homo sapiens OX=9606 GN=LIN7A PE=1 SV=2	1	5	5	3	0	1	2	0	0	0	0	1	0	0	0	0	0	0	0	0	0	1	0	0	0	0	0	0	0	0	0	1	0	0	0	0	0	0	0	0	0	0
Q5SRD1-2;Q5SRD1;O14925	Q5SRD1-2;Q5SRD1;O14925	2;2;2	2;2;2	2;2;2	Putative mitochondrial import inner membrane translocase subunit Tim23B;Mitochondrial import inner membrane translocase subunit Tim23	TIMM23B;TIMM23	sp|Q5SRD1-2|TI23B_HUMAN Isoform 2 of Mitochondrial import inner membrane translocase subunit Tim23B OS=Homo sapiens OX=9606 GN=TIMM23B;sp|Q5SRD1|TI23B_HUMAN Mitochondrial import inner membrane translocase subunit Tim23B OS=Homo sapiens OX=9606 GN=TIMM23B P	3	2	2	2	0	0	1	0	1	0	0	0	0	1	1	2	0	0	0	1	1	0	0	1	0	0	0	0	0	0	1	1	0	0	1	1	1	0	0	0	1	0
O14926;O14926-2	O14926;O14926-2	2;2	2;2	2;2	Fascin-2	FSCN2	sp|O14926|FSCN2_HUMAN Fascin-2 OS=Homo sapiens OX=9606 GN=FSCN2 PE=1 SV=1;sp|O14926-2|FSCN2_HUMAN Isoform 2 of Fascin-2 OS=Homo sapiens OX=9606 GN=FSCN2	2	2	2	2	1	1	2	1	1	1	1	2	1	1	1	1	1	1	1	1	0	1	1	1	1	1	2	1	1	1	1	1	2	1	2	2	1	1	0	1	1	1
O14929;O14929-2	O14929;O14929-2	2;1	2;1	2;1	Histone acetyltransferase type B catalytic subunit	HAT1	sp|O14929|HAT1_HUMAN Histone acetyltransferase type B catalytic subunit OS=Homo sapiens OX=9606 GN=HAT1 PE=1 SV=1;sp|O14929-2|HAT1_HUMAN Isoform B of Histone acetyltransferase type B catalytic subunit OS=Homo sapiens OX=9606 GN=HAT1	2	2	2	2	0	0	0	1	1	1	1	0	0	1	0	1	1	0	1	0	1	1	1	0	1	1	1	0	2	1	0	0	0	0	0	0	1	0	0	0	1	1
O14936-4;O14936-6;O14936-2;O14936;O14936-3;O14936-5	O14936-4;O14936-6;O14936-2;O14936;O14936-3;O14936-5	8;8;8;8;7;5	8;8;8;8;7;5	8;8;8;8;7;5	Peripheral plasma membrane protein CASK	CASK	sp|O14936-4|CSKP_HUMAN Isoform 4 of Peripheral plasma membrane protein CASK OS=Homo sapiens OX=9606 GN=CASK;sp|O14936-6|CSKP_HUMAN Isoform 6 of Peripheral plasma membrane protein CASK OS=Homo sapiens OX=9606 GN=CASK;sp|O14936-2|CSKP_HUMAN Isoform 2 of Peri	6	8	8	8	2	2	2	3	2	2	1	2	2	4	3	4	2	2	4	2	2	3	4	5	2	3	4	3	3	4	2	4	0	1	4	5	2	3	2	1	2	2
P19105;O14950;P29269;P24844;P24844-2	P19105;O14950;P29269;P24844	6;6;3;3;2	6;6;3;3;2	6;6;3;3;2	Myosin regulatory light chain 12A;Myosin regulatory light chain 12B;Myosin regulatory light polypeptide 9	MYL12A;MYL12B;MYL9	sp|P19105|ML12A_HUMAN Myosin regulatory light chain 12A OS=Homo sapiens OX=9606 GN=MYL12A PE=1 SV=2;sp|O14950|ML12B_HUMAN Myosin regulatory light chain 12B OS=Homo sapiens OX=9606 GN=MYL12B PE=1 SV=2;sp|P29269|MYL9_PIG Myosin regulatory light polypeptide 9	5	6	6	6	3	4	3	4	3	4	3	3	3	4	3	4	3	4	4	4	3	4	4	4	3	4	3	3	4	4	4	4	3	4	4	5	3	4	4	4	3	3
O14972-2;O14972	O14972-2;O14972	2;2	2;2	2;2	Down syndrome critical region protein 3	DSCR3	sp|O14972-2|VP26C_HUMAN Isoform 2 of Vacuolar protein sorting-associated protein 26C OS=Homo sapiens OX=9606 GN=VPS26C;sp|O14972|VP26C_HUMAN Vacuolar protein sorting-associated protein 26C OS=Homo sapiens OX=9606 GN=VPS26C PE=1 SV=1	2	2	2	2	1	1	1	1	1	2	0	1	0	0	1	1	1	1	0	1	1	2	1	1	2	1	1	1	1	1	1	1	0	2	1	1	1	0	0	1	1	0
O14974-4;O14974-3;O14974-2;O14974;O14974-5	O14974-4;O14974-3;O14974-2;O14974;O14974-5	2;2;2;2;1	2;2;2;2;1	2;2;2;2;1	Protein phosphatase 1 regulatory subunit 12A	PPP1R12A	sp|O14974-4|MYPT1_HUMAN Isoform 4 of Protein phosphatase 1 regulatory subunit 12A OS=Homo sapiens OX=9606 GN=PPP1R12A;sp|O14974-3|MYPT1_HUMAN Isoform 3 of Protein phosphatase 1 regulatory subunit 12A OS=Homo sapiens OX=9606 GN=PPP1R12A;sp|O14974-2|MYPT1_HU	5	2	2	2	0	2	1	0	0	1	1	1	1	1	0	0	1	0	0	0	1	1	0	0	1	0	0	0	1	1	0	0	1	1	0	2	0	1	1	1	1	1
O14979-3;O14979-2	O14979-3;O14979-2	12;12	12;12	1;1	Heterogeneous nuclear ribonucleoprotein D-like	HNRNPDL	sp|O14979-3|HNRDL_HUMAN Isoform 3 of Heterogeneous nuclear ribonucleoprotein D-like OS=Homo sapiens OX=9606 GN=HNRNPDL;sp|O14979-2|HNRDL_HUMAN Isoform 2 of Heterogeneous nuclear ribonucleoprotein D-like OS=Homo sapiens OX=9606 GN=HNRNPDL	2	12	12	1	8	5	5	6	7	5	7	6	7	5	6	7	7	7	7	4	7	6	4	4	8	4	3	4	8	6	6	5	4	6	7	5	6	5	6	3	6	5
O14980	O14980	25	25	25	Exportin-1	XPO1	sp|O14980|XPO1_HUMAN Exportin-1 OS=Homo sapiens OX=9606 GN=XPO1 PE=1 SV=1	1	25	25	25	14	13	16	16	12	12	13	12	12	14	16	15	15	11	12	13	13	12	14	13	15	12	14	13	15	13	16	12	13	13	16	18	13	13	14	14	12	12
O14981;O14981-2	O14981	4;1	4;1	4;1	TATA-binding protein-associated factor 172	BTAF1	sp|O14981|BTAF1_HUMAN TATA-binding protein-associated factor 172 OS=Homo sapiens OX=9606 GN=BTAF1 PE=1 SV=2	2	4	4	4	1	1	0	0	0	0	0	0	1	0	0	0	0	0	0	0	0	0	1	0	0	0	0	0	0	0	0	1	0	0	0	0	1	2	0	0	1	0
O14983;O14983-2;O14983-3	O14983;O14983-2;O14983-3	5;5;4	1;1;1	1;1;1	Sarcoplasmic/endoplasmic reticulum calcium ATPase 1	ATP2A1	sp|O14983|AT2A1_HUMAN Sarcoplasmic/endoplasmic reticulum calcium ATPase 1 OS=Homo sapiens OX=9606 GN=ATP2A1 PE=1 SV=1;sp|O14983-2|AT2A1_HUMAN Isoform SERCA1A of Sarcoplasmic/endoplasmic reticulum calcium ATPase 1 OS=Homo sapiens OX=9606 GN=ATP2A1;sp|O14983	3	5	1	1	2	2	3	2	3	3	3	3	3	2	4	2	2	3	2	2	3	3	2	3	3	1	2	2	3	2	3	3	3	2	2	3	3	3	3	3	2	3
O14994	O14994	1	1	1	Synapsin-3	SYN3	sp|O14994|SYN3_HUMAN Synapsin-3 OS=Homo sapiens OX=9606 GN=SYN3 PE=1 SV=2	1	1	1	1	1	1	1	1	1	1	1	1	1	1	1	1	1	1	1	1	1	1	1	1	1	1	1	1	1	1	1	1	1	1	1	1	1	1	1	1	1	1
O15014;O15014-2	O15014;O15014-2	2;1	2;1	2;1	Zinc finger protein 609	ZNF609	sp|O15014|ZN609_HUMAN Zinc finger protein 609 OS=Homo sapiens OX=9606 GN=ZNF609 PE=1 SV=2;sp|O15014-2|ZN609_HUMAN Isoform 2 of Zinc finger protein 609 OS=Homo sapiens OX=9606 GN=ZNF609	2	2	2	2	0	0	0	1	1	0	0	0	0	1	0	0	0	0	0	0	0	0	0	0	0	0	0	0	0	0	0	0	0	0	1	0	0	0	0	0	0	0
O15020;O15020-2	O15020;O15020-2	24;23	18;17	18;17	Spectrin beta chain, non-erythrocytic 2	SPTBN2	sp|O15020|SPTN2_HUMAN Spectrin beta chain, non-erythrocytic 2 OS=Homo sapiens OX=9606 GN=SPTBN2 PE=1 SV=3;sp|O15020-2|SPTN2_HUMAN Isoform 2 of Spectrin beta chain, non-erythrocytic 2 OS=Homo sapiens OX=9606 GN=SPTBN2	2	24	18	18	9	6	7	7	8	12	7	7	9	8	10	5	8	12	5	8	7	8	8	7	9	10	6	8	12	6	10	10	10	7	10	9	4	9	8	5	7	7
O15031;O60486;Q9Y4D7	O15031	8;1;1	8;1;1	8;1;1	Plexin-B2	PLXNB2	sp|O15031|PLXB2_HUMAN Plexin-B2 OS=Homo sapiens OX=9606 GN=PLXNB2 PE=1 SV=3	3	8	8	8	0	3	0	2	0	1	0	0	0	0	0	0	2	2	0	1	1	1	0	0	1	3	1	0	1	2	2	0	2	2	1	0	0	1	0	2	1	1
O15034;O15034-2	O15034;O15034-2	2;1	2;1	2;1	RIMS-binding protein 2	RIMBP2	sp|O15034|RIMB2_HUMAN RIMS-binding protein 2 OS=Homo sapiens OX=9606 GN=RIMBP2 PE=1 SV=3;sp|O15034-2|RIMB2_HUMAN Isoform 2 of RIMS-binding protein 2 OS=Homo sapiens OX=9606 GN=RIMBP2	2	2	2	2	0	0	0	1	0	0	0	0	0	0	0	0	0	0	0	0	0	0	0	0	0	0	0	0	0	0	0	0	0	0	0	0	0	0	0	1	0	0
O15042;O15042-2;O15042-3	O15042;O15042-2;O15042-3	8;8;6	8;8;6	8;8;6	U2 snRNP-associated SURP motif-containing protein	U2SURP	sp|O15042|SR140_HUMAN U2 snRNP-associated SURP motif-containing protein OS=Homo sapiens OX=9606 GN=U2SURP PE=1 SV=2;sp|O15042-2|SR140_HUMAN Isoform 2 of U2 snRNP-associated SURP motif-containing protein OS=Homo sapiens OX=9606 GN=U2SURP;sp|O15042-3|SR140_H	3	8	8	8	2	1	1	0	2	1	1	1	2	2	1	2	1	2	0	1	1	0	1	0	2	1	1	1	2	1	3	1	1	0	1	3	1	0	1	1	0	0
O15050	O15050	3	3	3	TPR and ankyrin repeat-containing protein 1	TRANK1	sp|O15050|TRNK1_HUMAN TPR and ankyrin repeat-containing protein 1 OS=Homo sapiens OX=9606 GN=TRANK1 PE=2 SV=4	1	3	3	3	1	0	0	0	1	0	0	0	1	0	0	0	1	0	0	0	1	1	0	0	1	0	0	0	1	0	0	0	1	0	1	1	1	1	0	0	0	0
O15061-3;O15061-2;O15061	O15061-3;O15061-2;O15061	1;1;1	1;1;1	1;1;1	Synemin	SYNM	sp|O15061-3|SYNEM_HUMAN Isoform 3 of Synemin OS=Homo sapiens OX=9606 GN=SYNM;sp|O15061-2|SYNEM_HUMAN Isoform 2 of Synemin OS=Homo sapiens OX=9606 GN=SYNM;sp|O15061|SYNEM_HUMAN Synemin OS=Homo sapiens OX=9606 GN=SYNM PE=1 SV=2	3	1	1	1	0	0	0	0	0	0	0	0	0	0	0	0	0	0	0	0	0	0	0	0	0	0	0	0	0	0	0	0	0	0	0	0	0	0	0	0	0	0
O15066	O15066	1	1	1	Kinesin-like protein KIF3B;Kinesin-like protein KIF3B, N-terminally processed	KIF3B	sp|O15066|KIF3B_HUMAN Kinesin-like protein KIF3B OS=Homo sapiens OX=9606 GN=KIF3B PE=1 SV=1	1	1	1	1	1	0	0	0	0	0	0	0	0	0	0	0	0	0	0	0	0	0	0	0	0	0	0	0	0	0	0	0	0	0	0	0	0	0	0	0	1	0
O15075;O15075-4;O15075-2;O15075-3	O15075;O15075-4;O15075-2	9;6;6;3	9;6;6;3	9;6;6;3	Serine/threonine-protein kinase DCLK1	DCLK1	sp|O15075|DCLK1_HUMAN Serine/threonine-protein kinase DCLK1 OS=Homo sapiens OX=9606 GN=DCLK1 PE=1 SV=2;sp|O15075-4|DCLK1_HUMAN Isoform 4 of Serine/threonine-protein kinase DCLK1 OS=Homo sapiens OX=9606 GN=DCLK1;sp|O15075-2|DCLK1_HUMAN Isoform 1 of Serine/t	4	9	9	9	3	5	2	4	3	5	3	3	4	5	3	2	5	5	4	5	5	6	3	4	2	6	3	4	5	3	2	4	5	3	4	6	5	6	3	2	5	5
O15079;O15079-2	O15079;O15079-2	1;1	1;1	1;1	Syntaphilin	SNPH	sp|O15079|SNPH_HUMAN Syntaphilin OS=Homo sapiens OX=9606 GN=SNPH PE=1 SV=2;sp|O15079-2|SNPH_HUMAN Isoform 2 of Syntaphilin OS=Homo sapiens OX=9606 GN=SNPH	2	1	1	1	0	0	1	0	0	1	0	0	0	0	0	0	0	1	1	0	0	1	0	0	0	1	1	0	0	1	1	0	0	0	1	1	0	0	0	0	0	0
O15083	O15083	3	2	2	ERC protein 2	ERC2	sp|O15083|ERC2_HUMAN ERC protein 2 OS=Homo sapiens OX=9606 GN=ERC2 PE=1 SV=3	1	3	2	2	1	1	1	1	1	0	1	0	1	0	1	1	2	1	1	1	1	1	1	1	1	1	1	1	1	1	1	1	0	1	1	1	1	2	1	1	1	1
O15085;O15085-2	O15085;O15085-2	1;1	1;1	1;1	Rho guanine nucleotide exchange factor 11	ARHGEF11	sp|O15085|ARHGB_HUMAN Rho guanine nucleotide exchange factor 11 OS=Homo sapiens OX=9606 GN=ARHGEF11 PE=1 SV=1;sp|O15085-2|ARHGB_HUMAN Isoform 2 of Rho guanine nucleotide exchange factor 11 OS=Homo sapiens OX=9606 GN=ARHGEF11	2	1	1	1	0	0	1	0	0	1	1	1	0	1	0	1	0	1	1	1	0	1	0	0	0	1	1	1	1	1	1	0	1	1	1	1	0	0	1	1	1	0
O15116	O15116	2	2	2	U6 snRNA-associated Sm-like protein LSm1	LSM1	sp|O15116|LSM1_HUMAN U6 snRNA-associated Sm-like protein LSm1 OS=Homo sapiens OX=9606 GN=LSM1 PE=1 SV=1	1	2	2	2	1	0	1	0	0	0	0	0	0	0	0	0	0	0	0	0	0	0	0	0	0	0	0	0	0	0	1	1	0	0	0	1	0	0	0	0	0	0
O15127	O15127	1	1	1	Secretory carrier-associated membrane protein 2	SCAMP2	sp|O15127|SCAM2_HUMAN Secretory carrier-associated membrane protein 2 OS=Homo sapiens OX=9606 GN=SCAMP2 PE=1 SV=2	1	1	1	1	0	1	1	1	1	1	1	0	1	0	1	1	0	1	1	0	0	1	0	1	0	1	0	1	1	0	1	0	1	1	1	1	1	1	1	1	0	1
O15143	O15143	4	3	3	Actin-related protein 2/3 complex subunit 1B	ARPC1B	sp|O15143|ARC1B_HUMAN Actin-related protein 2/3 complex subunit 1B OS=Homo sapiens OX=9606 GN=ARPC1B PE=1 SV=3	1	4	3	3	1	2	3	1	1	1	1	0	2	1	1	3	2	1	1	0	2	0	0	0	2	1	0	1	2	1	1	1	1	2	0	0	1	2	2	1	2	1
O15144	O15144	5	5	5	Actin-related protein 2/3 complex subunit 2	ARPC2	sp|O15144|ARPC2_HUMAN Actin-related protein 2/3 complex subunit 2 OS=Homo sapiens OX=9606 GN=ARPC2 PE=1 SV=1	1	5	5	5	1	0	0	0	0	1	1	1	1	0	0	0	1	0	0	0	1	1	1	0	0	0	1	1	1	1	1	2	1	1	1	1	1	1	0	1	1	0
O15145	O15145	2	2	2	Actin-related protein 2/3 complex subunit 3	ARPC3	sp|O15145|ARPC3_HUMAN Actin-related protein 2/3 complex subunit 3 OS=Homo sapiens OX=9606 GN=ARPC3 PE=1 SV=3	1	2	2	2	2	1	2	1	2	2	2	1	2	1	1	1	1	1	2	1	2	1	1	1	1	0	1	1	2	2	1	1	1	2	1	2	2	2	2	2	2	2
O15173;O15173-2	O15173;O15173-2	3;3	2;2	2;2	Membrane-associated progesterone receptor component 2	PGRMC2	sp|O15173|PGRC2_HUMAN Membrane-associated progesterone receptor component 2 OS=Homo sapiens OX=9606 GN=PGRMC2 PE=1 SV=1;sp|O15173-2|PGRC2_HUMAN Isoform 2 of Membrane-associated progesterone receptor component 2 OS=Homo sapiens OX=9606 GN=PGRMC2	2	3	2	2	1	2	0	0	1	1	0	0	1	2	0	1	1	1	0	1	1	1	0	0	1	1	0	0	1	0	0	0	1	0	1	1	1	2	0	0	1	1
O15182	O15182	1	1	1	Centrin-3	CETN3	sp|O15182|CETN3_HUMAN Centrin-3 OS=Homo sapiens OX=9606 GN=CETN3 PE=1 SV=2	1	1	1	1	1	0	0	1	0	0	1	1	0	1	0	1	0	1	0	1	0	1	0	1	0	1	1	1	0	1	1	1	0	0	1	1	1	0	1	0	0	0
O15217	O15217	2	2	2	Glutathione S-transferase A4	GSTA4	sp|O15217|GSTA4_HUMAN Glutathione S-transferase A4 OS=Homo sapiens OX=9606 GN=GSTA4 PE=1 SV=1	1	2	2	2	1	1	1	1	1	1	1	1	1	1	1	1	1	1	1	1	1	1	1	2	1	1	1	1	1	1	1	2	1	1	0	1	1	1	1	1	1	1
O15240	O15240	1	1	1	Neurosecretory protein VGF;Neuroendocrine regulatory peptide-1;Neuroendocrine regulatory peptide-2;Antimicrobial peptide VGF[554-577]	VGF	sp|O15240|VGF_HUMAN Neurosecretory protein VGF OS=Homo sapiens OX=9606 GN=VGF PE=1 SV=2	1	1	1	1	1	1	0	0	0	0	1	1	1	0	0	0	1	0	1	0	1	0	1	0	0	0	0	0	1	0	1	1	0	0	0	1	0	0	0	0	1	1
O15258	O15258	1	1	1	Protein RER1	RER1	sp|O15258|RER1_HUMAN Protein RER1 OS=Homo sapiens OX=9606 GN=RER1 PE=1 SV=1	1	1	1	1	1	1	1	1	1	1	1	1	0	1	1	1	1	1	1	1	1	1	1	1	1	1	1	1	1	1	1	1	1	1	1	1	1	1	0	1	1	1
O15260;O15260-2;O15260-3	O15260;O15260-2;O15260-3	4;4;3	4;4;3	4;4;3	Surfeit locus protein 4	SURF4	sp|O15260|SURF4_HUMAN Surfeit locus protein 4 OS=Homo sapiens OX=9606 GN=SURF4 PE=1 SV=3;sp|O15260-2|SURF4_HUMAN Isoform 2 of Surfeit locus protein 4 OS=Homo sapiens OX=9606 GN=SURF4;sp|O15260-3|SURF4_HUMAN Isoform 3 of Surfeit locus protein 4 OS=Homo sapi	3	4	4	4	3	3	3	3	3	2	2	1	3	2	1	3	3	3	2	2	3	3	1	3	3	2	3	2	3	3	2	2	3	3	1	3	2	3	2	3	1	3
O15270	O15270	2	2	2	Serine palmitoyltransferase 2	SPTLC2	sp|O15270|SPTC2_HUMAN Serine palmitoyltransferase 2 OS=Homo sapiens OX=9606 GN=SPTLC2 PE=1 SV=1	1	2	2	2	0	0	0	0	0	1	0	0	0	1	1	0	0	1	0	0	0	1	0	1	0	0	0	1	0	0	1	1	0	0	0	0	0	0	0	0	0	0
O15294-3	O15294-3	12	12	1	UDP-N-acetylglucosamine--peptide N-acetylglucosaminyltransferase 110 kDa subunit	OGT	sp|O15294-3|OGT1_HUMAN Isoform 1 of UDP-N-acetylglucosamine--peptide N-acetylglucosaminyltransferase 110 kDa subunit OS=Homo sapiens OX=9606 GN=OGT	1	12	12	1	3	4	3	7	4	3	3	5	3	4	3	5	4	4	5	3	6	3	4	4	3	3	4	4	4	2	5	4	4	2	5	6	2	2	6	4	2	4
O15303	O15303	4	4	4	Metabotropic glutamate receptor 6	GRM6	sp|O15303|GRM6_HUMAN Metabotropic glutamate receptor 6 OS=Homo sapiens OX=9606 GN=GRM6 PE=1 SV=2	1	4	4	4	2	1	1	2	2	1	1	1	1	1	1	1	1	1	1	1	1	1	1	1	1	0	2	1	1	1	2	2	1	2	2	1	1	1	1	0	1	1
O15321-2;O15321	O15321-2;O15321	3;3	3;3	3;3	Transmembrane 9 superfamily member 1	TM9SF1	sp|O15321-2|TM9S1_HUMAN Isoform 2 of Transmembrane 9 superfamily member 1 OS=Homo sapiens OX=9606 GN=TM9SF1;sp|O15321|TM9S1_HUMAN Transmembrane 9 superfamily member 1 OS=Homo sapiens OX=9606 GN=TM9SF1 PE=2 SV=2	2	3	3	3	0	0	0	0	0	0	0	0	0	0	0	0	0	0	0	0	0	0	0	0	0	0	1	0	1	0	0	0	0	0	0	0	1	0	0	0	0	0
O15327	O15327	2	2	2	Type II inositol 3,4-bisphosphate 4-phosphatase	INPP4B	sp|O15327|INP4B_HUMAN Inositol polyphosphate 4-phosphatase type II OS=Homo sapiens OX=9606 GN=INPP4B PE=1 SV=4	1	2	2	2	1	1	0	0	2	0	0	0	1	0	0	0	1	0	0	0	1	0	0	0	1	0	0	0	1	1	0	0	0	0	0	0	0	0	0	0	1	0
O15354	O15354	2	2	2	Prosaposin receptor GPR37	GPR37	sp|O15354|GPR37_HUMAN Prosaposin receptor GPR37 OS=Homo sapiens OX=9606 GN=GPR37 PE=1 SV=2	1	2	2	2	2	2	2	2	2	2	2	1	2	2	1	1	2	2	2	2	2	2	2	1	2	2	2	1	2	2	2	2	2	2	2	2	2	2	2	2	2	1
O15355	O15355	5	5	5	Protein phosphatase 1G	PPM1G	sp|O15355|PPM1G_HUMAN Protein phosphatase 1G OS=Homo sapiens OX=9606 GN=PPM1G PE=1 SV=1	1	5	5	5	2	1	1	0	4	1	1	1	3	1	3	2	3	2	2	1	1	3	1	1	3	2	1	2	0	1	3	1	3	1	2	2	2	1	1	1	0	2
O15371-2;O15371-3;O15371	O15371-2;O15371-3;O15371	12;12;12	12;12;12	12;12;12	Eukaryotic translation initiation factor 3 subunit D	EIF3D	sp|O15371-2|EIF3D_HUMAN Isoform 2 of Eukaryotic translation initiation factor 3 subunit D OS=Homo sapiens OX=9606 GN=EIF3D;sp|O15371-3|EIF3D_HUMAN Isoform 3 of Eukaryotic translation initiation factor 3 subunit D OS=Homo sapiens OX=9606 GN=EIF3D;sp|O15371|	3	12	12	12	5	6	5	5	5	5	3	5	4	4	4	3	5	4	3	5	3	5	5	4	6	4	3	5	6	3	3	4	5	3	5	6	6	4	5	4	6	3
O15372	O15372	4	4	4	Eukaryotic translation initiation factor 3 subunit H	EIF3H	sp|O15372|EIF3H_HUMAN Eukaryotic translation initiation factor 3 subunit H OS=Homo sapiens OX=9606 GN=EIF3H PE=1 SV=1	1	4	4	4	1	0	0	1	1	0	1	0	0	0	0	0	2	2	1	1	0	0	1	1	1	0	1	1	3	2	1	1	1	0	1	1	0	0	1	1	1	1
O15379;O15379-2	O15379;O15379-2	2;2	2;2	2;2	Histone deacetylase 3	HDAC3	sp|O15379|HDAC3_HUMAN Histone deacetylase 3 OS=Homo sapiens OX=9606 GN=HDAC3 PE=1 SV=2;sp|O15379-2|HDAC3_HUMAN Isoform 2 of Histone deacetylase 3 OS=Homo sapiens OX=9606 GN=HDAC3	2	2	2	2	0	0	0	0	0	0	1	0	0	0	0	0	0	1	0	0	0	0	0	0	1	0	0	0	0	0	0	0	1	0	0	0	0	1	1	0	0	0
O15381-3;O15381-4;O15381-2;O15381-5;O15381	O15381-3;O15381-4;O15381-2;O15381-5;O15381	2;2;2;2;2	2;2;2;2;2	2;2;2;2;2	Nuclear valosin-containing protein-like	NVL	sp|O15381-3|NVL_HUMAN Isoform 3 of Nuclear valosin-containing protein-like OS=Homo sapiens OX=9606 GN=NVL;sp|O15381-4|NVL_HUMAN Isoform 4 of Nuclear valosin-containing protein-like OS=Homo sapiens OX=9606 GN=NVL;sp|O15381-2|NVL_HUMAN Isoform 2 of Nuclear v	5	2	2	2	1	0	1	0	0	0	0	0	1	0	0	0	0	0	1	0	0	0	1	0	1	0	1	0	1	0	0	0	0	0	0	1	1	0	0	0	0	0
O15394;O15394-2	O15394	6;2	6;2	6;2	Neural cell adhesion molecule 2	NCAM2	sp|O15394|NCAM2_HUMAN Neural cell adhesion molecule 2 OS=Homo sapiens OX=9606 GN=NCAM2 PE=1 SV=2	2	6	6	6	4	5	5	5	4	3	4	5	4	3	5	4	5	5	5	5	4	4	5	5	5	3	5	5	5	4	5	4	4	4	5	5	4	4	4	3	3	3
O15400-2;O15400	O15400-2;O15400	4;4	4;4	4;4	Syntaxin-7	STX7	sp|O15400-2|STX7_HUMAN Isoform 2 of Syntaxin-7 OS=Homo sapiens OX=9606 GN=STX7;sp|O15400|STX7_HUMAN Syntaxin-7 OS=Homo sapiens OX=9606 GN=STX7 PE=1 SV=4	2	4	4	4	2	1	1	1	2	0	1	2	1	1	1	1	2	0	0	2	1	0	1	1	0	1	0	1	1	0	1	1	0	0	2	0	2	0	0	1	1	1
O15427	O15427	1	1	1	Monocarboxylate transporter 4	SLC16A3	sp|O15427|MOT4_HUMAN Monocarboxylate transporter 4 OS=Homo sapiens OX=9606 GN=SLC16A3 PE=1 SV=1	1	1	1	1	1	1	1	1	1	1	0	1	1	1	1	1	1	1	1	1	1	1	1	1	1	1	1	1	1	1	1	1	1	1	1	1	1	1	1	1	1	1
O15439-2;O15439	O15439-2;O15439	2;2	2;2	2;2	Multidrug resistance-associated protein 4	ABCC4	sp|O15439-2|MRP4_HUMAN Isoform 2 of Multidrug resistance-associated protein 4 OS=Homo sapiens OX=9606 GN=ABCC4;sp|O15439|MRP4_HUMAN Multidrug resistance-associated protein 4 OS=Homo sapiens OX=9606 GN=ABCC4 PE=1 SV=3	2	2	2	2	0	0	0	0	0	0	0	0	0	0	0	0	0	0	0	0	0	0	0	0	0	0	0	0	0	0	0	1	0	0	0	0	0	0	0	0	0	0
O15498;O15498-2	O15498;O15498-2	3;2	3;2	3;2	Synaptobrevin homolog YKT6	YKT6	sp|O15498|YKT6_HUMAN Synaptobrevin homolog YKT6 OS=Homo sapiens OX=9606 GN=YKT6 PE=1 SV=1;sp|O15498-2|YKT6_HUMAN Isoform 2 of Synaptobrevin homolog YKT6 OS=Homo sapiens OX=9606 GN=YKT6	2	3	3	3	2	1	1	1	1	2	1	1	1	1	1	0	1	1	1	2	1	1	1	1	1	1	1	2	2	1	1	3	1	1	3	2	2	2	1	2	1	1
O15511;O15511-2	O15511;O15511-2	3;3	3;3	3;3	Actin-related protein 2/3 complex subunit 5	ARPC5	sp|O15511|ARPC5_HUMAN Actin-related protein 2/3 complex subunit 5 OS=Homo sapiens OX=9606 GN=ARPC5 PE=1 SV=3;sp|O15511-2|ARPC5_HUMAN Isoform 2 of Actin-related protein 2/3 complex subunit 5 OS=Homo sapiens OX=9606 GN=ARPC5	2	3	3	3	0	1	2	1	1	2	0	1	2	1	1	0	2	1	2	1	1	0	0	1	2	0	0	1	0	0	1	2	2	1	0	2	2	2	2	2	1	2
O15523-2;O15523	O15523-2;O15523	9;9	1;1	1;1	ATP-dependent RNA helicase DDX3Y	DDX3Y	sp|O15523-2|DDX3Y_HUMAN Isoform 2 of ATP-dependent RNA helicase DDX3Y OS=Homo sapiens OX=9606 GN=DDX3Y;sp|O15523|DDX3Y_HUMAN ATP-dependent RNA helicase DDX3Y OS=Homo sapiens OX=9606 GN=DDX3Y PE=1 SV=2	2	9	1	1	5	7	5	6	6	5	5	7	6	5	6	5	5	4	6	4	6	6	5	6	8	7	6	6	9	6	6	7	5	4	7	5	6	5	7	6	5	6
O15537	O15537	6	6	6	Retinoschisin	RS1	sp|O15537|XLRS1_HUMAN Retinoschisin OS=Homo sapiens OX=9606 GN=RS1 PE=1 SV=2	1	6	6	6	4	4	4	5	3	4	4	4	5	4	4	5	4	4	4	4	4	4	4	4	4	4	4	5	4	4	4	5	4	4	5	6	4	4	4	4	4	5
O15540;O15540-2	O15540;O15540-2	4;3	4;3	4;3	Fatty acid-binding protein, brain	FABP7	sp|O15540|FABP7_HUMAN Fatty acid-binding protein, brain OS=Homo sapiens OX=9606 GN=FABP7 PE=1 SV=3;sp|O15540-2|FABP7_HUMAN Isoform 2 of Fatty acid-binding protein, brain OS=Homo sapiens OX=9606 GN=FABP7	2	4	4	4	2	2	2	2	1	2	2	2	1	2	2	2	1	2	2	2	1	2	2	2	1	2	2	2	0	2	2	3	3	3	2	2	1	2	3	2	1	3
O15541	O15541	1	1	1	RING finger protein 113A	RNF113A	sp|O15541|R113A_HUMAN E3 ubiquitin-protein ligase RNF113A OS=Homo sapiens OX=9606 GN=RNF113A PE=1 SV=1	1	1	1	1	0	0	0	0	0	0	0	0	0	0	0	0	0	0	0	0	0	0	0	0	0	0	0	0	0	0	0	0	0	0	0	0	1	0	0	0	0	0
O18766;P08100	O18766	8;2	8;2	8;2			sp|O18766|OPSD_PIG Rhodopsin OS=Sus scrofa OX=9823 GN=RHO PE=1 SV=1	2	8	8	8	2	2	3	3	3	2	2	2	2	2	2	2	3	2	2	2	3	2	3	2	2	2	2	3	3	2	2	2	4	3	5	3	3	6	4	4	5	5
O18868;Q14721	O18868;Q14721	10;8	10;8	7;5	Potassium voltage-gated channel subfamily B member 1	KCNB1	sp|O18868|KCNB1_PIG Potassium voltage-gated channel subfamily B member 1 OS=Sus scrofa OX=9823 GN=KCNB1 PE=2 SV=1;sp|Q14721|KCNB1_HUMAN Potassium voltage-gated channel subfamily B member 1 OS=Homo sapiens OX=9606 GN=KCNB1 PE=1 SV=2	2	10	10	7	4	3	3	2	3	4	2	3	3	5	5	3	6	4	4	3	4	4	4	3	5	3	3	3	6	3	4	6	5	3	5	5	4	4	3	2	4	5
O18994	O18994	1	1	1			sp|O18994|GPX5_PIG Epididymal secretory glutathione peroxidase OS=Sus scrofa OX=9823 GN=GPX5 PE=1 SV=1	1	1	1	1	0	0	0	1	0	1	1	1	0	0	0	0	0	0	0	1	0	0	0	1	0	0	0	1	0	0	0	0	0	0	0	0	0	0	0	0	0	0
O19062	O19062	3	3	3			sp|O19062|CRP_PIG C-reactive protein OS=Sus scrofa OX=9823 GN=CRP PE=2 SV=1	1	3	3	3	0	0	0	0	0	0	0	0	0	0	0	0	0	0	0	0	0	0	0	0	0	0	0	0	0	0	0	0	0	0	0	0	0	0	0	0	0	0
O19069;O19069-1;P53597	O19069;O19069-1	9;8;1	9;8;1	9;8;1			sp|O19069|SUCA_PIG Succinate--CoA ligase [ADP/GDP-forming] subunit alpha, mitochondrial OS=Sus scrofa OX=9823 GN=SUCLG1 PE=1 SV=2;sp|O19069-1|SUCA_PIG Isoform II of Succinate--CoA ligase [ADP/GDP-forming] subunit alpha, mitochondrial OS=Sus scrofa OX=9823	3	9	9	9	4	5	5	5	5	5	5	5	5	5	5	5	5	5	5	5	5	5	4	5	5	5	5	5	5	5	5	5	5	5	5	5	5	5	5	5	5	7
O19073	O19073	2	2	2			sp|O19073|IL18_PIG Interleukin-18 OS=Sus scrofa OX=9823 GN=IL18 PE=2 SV=2	1	2	2	2	0	0	0	0	0	0	0	0	0	0	0	0	0	0	0	0	0	0	1	0	0	0	0	0	0	0	0	0	0	0	0	0	0	1	0	0	0	0
O43143	O43143	16	16	16	Pre-mRNA-splicing factor ATP-dependent RNA helicase DHX15	DHX15	sp|O43143|DHX15_HUMAN Pre-mRNA-splicing factor ATP-dependent RNA helicase DHX15 OS=Homo sapiens OX=9606 GN=DHX15 PE=1 SV=2	1	16	16	16	6	7	5	5	8	6	6	5	8	6	8	6	8	7	6	7	7	6	6	5	8	6	6	8	10	8	7	9	8	7	6	6	5	5	7	4	5	5
O43148;O43148-2	O43148;O43148-2	6;6	6;6	6;6	mRNA cap guanine-N7 methyltransferase	RNMT	sp|O43148|MCES_HUMAN mRNA cap guanine-N7 methyltransferase OS=Homo sapiens OX=9606 GN=RNMT PE=1 SV=1;sp|O43148-2|MCES_HUMAN Isoform 2 of mRNA cap guanine-N7 methyltransferase OS=Homo sapiens OX=9606 GN=RNMT	2	6	6	6	1	3	2	2	3	2	3	1	1	4	1	1	0	2	3	2	1	2	2	2	1	1	3	2	1	2	2	3	2	2	2	2	1	1	2	2	2	2
O43150-2;O43150	O43150-2;O43150	7;7	7;7	5;5	Arf-GAP with SH3 domain, ANK repeat and PH domain-containing protein 2	ASAP2	sp|O43150-2|ASAP2_HUMAN Isoform 2 of Arf-GAP with SH3 domain, ANK repeat and PH domain-containing protein 2 OS=Homo sapiens OX=9606 GN=ASAP2;sp|O43150|ASAP2_HUMAN Arf-GAP with SH3 domain, ANK repeat and PH domain-containing protein 2 OS=Homo sapiens OX=960	2	7	7	5	2	1	0	0	0	1	1	2	0	1	1	1	1	1	0	3	2	1	1	2	0	1	2	2	0	1	1	3	0	1	1	3	2	1	1	0	2	1
O43172-2;O43172	O43172-2;O43172	6;6	6;6	6;6	U4/U6 small nuclear ribonucleoprotein Prp4	PRPF4	sp|O43172-2|PRP4_HUMAN Isoform 2 of U4/U6 small nuclear ribonucleoprotein Prp4 OS=Homo sapiens OX=9606 GN=PRPF4;sp|O43172|PRP4_HUMAN U4/U6 small nuclear ribonucleoprotein Prp4 OS=Homo sapiens OX=9606 GN=PRPF4 PE=1 SV=2	2	6	6	6	0	1	2	2	2	2	0	2	1	2	2	2	2	1	1	3	1	0	3	1	3	1	3	2	0	0	2	3	4	1	3	3	0	3	1	1	0	0
O43181	O43181	3	3	3	NADH dehydrogenase [ubiquinone] iron-sulfur protein 4, mitochondrial	NDUFS4	sp|O43181|NDUS4_HUMAN NADH dehydrogenase [ubiquinone] iron-sulfur protein 4, mitochondrial OS=Homo sapiens OX=9606 GN=NDUFS4 PE=1 SV=1	1	3	3	3	1	1	1	2	1	1	1	2	1	2	1	1	1	1	1	1	1	1	1	2	1	1	1	2	1	1	1	2	1	1	1	1	1	1	1	1	1	1
O43186	O43186	2	2	2	Cone-rod homeobox protein	CRX	sp|O43186|CRX_HUMAN Cone-rod homeobox protein OS=Homo sapiens OX=9606 GN=CRX PE=1 SV=1	1	2	2	2	1	1	1	1	1	1	0	0	1	0	1	1	1	1	0	0	1	1	0	0	1	1	0	0	0	1	0	0	1	1	0	0	1	1	0	1	2	1
O43189;O43189-2	O43189;O43189-2	2;1	2;1	2;1	PHD finger protein 1	PHF1	sp|O43189|PHF1_HUMAN PHD finger protein 1 OS=Homo sapiens OX=9606 GN=PHF1 PE=1 SV=3;sp|O43189-2|PHF1_HUMAN Isoform 1 of PHD finger protein 1 OS=Homo sapiens OX=9606 GN=PHF1	2	2	2	2	1	0	0	0	0	0	0	0	0	0	0	0	1	0	1	0	1	0	0	0	0	0	0	0	0	0	0	0	0	0	0	0	0	0	1	0	0	0
O43236-5;O43236-2;O43236-3;O43236;O43236-4	O43236-5;O43236-2;O43236-3;O43236;O43236-4	2;2;2;2;2	2;2;2;2;2	2;2;2;2;2	Septin-4	SEPT4	sp|O43236-5|SEPT4_HUMAN Isoform 5 of Septin-4 OS=Homo sapiens OX=9606 GN=SEPTIN4;sp|O43236-2|SEPT4_HUMAN Isoform 2 of Septin-4 OS=Homo sapiens OX=9606 GN=SEPTIN4;sp|O43236-3|SEPT4_HUMAN Isoform 3 of Septin-4 OS=Homo sapiens OX=9606 GN=SEPTIN4;sp|O43236|SEP	5	2	2	2	1	2	2	2	2	2	2	1	1	1	1	1	2	2	1	1	1	2	1	0	1	1	2	1	2	2	2	1	1	2	1	1	1	2	2	2	1	2
O43237;O43237-2	O43237;O43237-2	6;5	5;5	5;5	Cytoplasmic dynein 1 light intermediate chain 2	DYNC1LI2	sp|O43237|DC1L2_HUMAN Cytoplasmic dynein 1 light intermediate chain 2 OS=Homo sapiens OX=9606 GN=DYNC1LI2 PE=1 SV=1;sp|O43237-2|DC1L2_HUMAN Isoform 2 of Cytoplasmic dynein 1 light intermediate chain 2 OS=Homo sapiens OX=9606 GN=DYNC1LI2	2	6	5	5	1	2	1	3	1	2	1	2	2	1	1	1	1	2	2	1	1	2	3	2	2	1	1	2	1	2	2	2	3	2	2	2	1	2	1	2	1	1
O43242;O43242-2	O43242;O43242-2	6;5	6;5	6;5	26S proteasome non-ATPase regulatory subunit 3	PSMD3	sp|O43242|PSMD3_HUMAN 26S proteasome non-ATPase regulatory subunit 3 OS=Homo sapiens OX=9606 GN=PSMD3 PE=1 SV=2;sp|O43242-2|PSMD3_HUMAN Isoform 2 of 26S proteasome non-ATPase regulatory subunit 3 OS=Homo sapiens OX=9606 GN=PSMD3	2	6	6	6	2	3	1	1	2	2	1	2	4	2	3	1	3	2	1	2	3	2	2	2	3	2	2	3	3	2	3	2	3	3	3	4	4	2	3	1	2	3
O43251-6;O43251-8	O43251-6;O43251-8	1;1	1;1	1;1			sp|O43251-6|RFOX2_HUMAN Isoform 6 of RNA binding protein fox-1 homolog 2 OS=Homo sapiens OX=9606 GN=RBFOX2;sp|O43251-8|RFOX2_HUMAN Isoform 8 of RNA binding protein fox-1 homolog 2 OS=Homo sapiens OX=9606 GN=RBFOX2	2	1	1	1	0	0	0	0	1	0	0	0	0	0	0	0	1	0	0	1	0	0	0	0	0	0	0	1	0	0	0	1	1	0	0	1	0	0	0	0	1	0
O43252;O95340;O95340-2	O43252	3;1;1	3;1;1	3;1;1	Bifunctional 3-phosphoadenosine 5-phosphosulfate synthase 1;Sulfate adenylyltransferase;Adenylyl-sulfate kinase	PAPSS1	sp|O43252|PAPS1_HUMAN Bifunctional 3-phosphoadenosine 5-phosphosulfate synthase 1 OS=Homo sapiens OX=9606 GN=PAPSS1 PE=1 SV=2	3	3	3	3	2	0	0	0	1	0	0	1	1	0	1	2	1	0	1	1	2	0	0	0	1	1	0	0	1	0	0	0	0	0	0	1	2	0	0	0	1	1
O43264-2;O43264	O43264-2;O43264	2;2	2;2	2;2	Centromere/kinetochore protein zw10 homolog	ZW10	sp|O43264-2|ZW10_HUMAN Isoform 2 of Centromere/kinetochore protein zw10 homolog OS=Homo sapiens OX=9606 GN=ZW10;sp|O43264|ZW10_HUMAN Centromere/kinetochore protein zw10 homolog OS=Homo sapiens OX=9606 GN=ZW10 PE=1 SV=3	2	2	2	2	0	1	2	1	1	1	1	0	0	1	1	1	1	0	1	2	0	1	2	1	1	1	1	1	1	2	2	0	1	1	1	2	0	1	1	1	0	1
O43272-2;O43272-1;O43272	O43272-2;O43272-1;O43272	1;1;1	1;1;1	1;1;1	Proline dehydrogenase 1, mitochondrial	PRODH	sp|O43272-2|PROD_HUMAN Isoform 2 of Proline dehydrogenase 1, mitochondrial OS=Homo sapiens OX=9606 GN=PRODH;sp|O43272-1|PROD_HUMAN Isoform 3 of Proline dehydrogenase 1, mitochondrial OS=Homo sapiens OX=9606 GN=PRODH;sp|O43272|PROD_HUMAN Proline dehydrogena	3	1	1	1	0	0	0	0	0	0	0	0	0	0	0	0	0	0	0	0	1	0	0	0	0	0	0	0	0	1	0	0	0	0	0	0	0	0	0	0	0	0
O43290	O43290	5	5	5	U4/U6.U5 tri-snRNP-associated protein 1	SART1	sp|O43290|SNUT1_HUMAN U4/U6.U5 tri-snRNP-associated protein 1 OS=Homo sapiens OX=9606 GN=SART1 PE=1 SV=1	1	5	5	5	2	1	0	0	1	3	1	1	1	0	1	0	0	2	0	0	0	2	2	1	0	2	0	0	3	1	0	0	1	1	1	2	0	1	1	1	0	1
O43294-2;O43294	O43294-2;O43294	2;2	2;2	2;2	Transforming growth factor beta-1-induced transcript 1 protein	TGFB1I1	sp|O43294-2|TGFI1_HUMAN Isoform 2 of Transforming growth factor beta-1-induced transcript 1 protein OS=Homo sapiens OX=9606 GN=TGFB1I1;sp|O43294|TGFI1_HUMAN Transforming growth factor beta-1-induced transcript 1 protein OS=Homo sapiens OX=9606 GN=TGFB1I1 P	2	2	2	2	0	0	0	0	0	0	0	0	0	0	0	0	0	0	0	0	1	0	0	0	1	0	0	0	1	0	0	0	0	0	0	1	0	0	1	0	0	0
O43295-2;O43295;O43295-3	O43295-2;O43295;O43295-3	7;6;4	7;6;4	7;6;4	SLIT-ROBO Rho GTPase-activating protein 3	SRGAP3	sp|O43295-2|SRGP3_HUMAN Isoform 2 of SLIT-ROBO Rho GTPase-activating protein 3 OS=Homo sapiens OX=9606 GN=SRGAP3;sp|O43295|SRGP3_HUMAN SLIT-ROBO Rho GTPase-activating protein 3 OS=Homo sapiens OX=9606 GN=SRGAP3 PE=1 SV=3;sp|O43295-3|SRGP3_HUMAN Isoform 3 o	3	7	7	7	1	0	1	0	1	1	0	0	2	0	1	0	1	1	0	1	0	0	0	0	2	0	1	2	2	2	1	1	1	1	1	4	0	3	2	0	1	0
O43301	O43301	14	14	13	Heat shock 70 kDa protein 12A	HSPA12A	sp|O43301|HS12A_HUMAN Heat shock 70 kDa protein 12A OS=Homo sapiens OX=9606 GN=HSPA12A PE=1 SV=2	1	14	14	13	6	6	8	8	7	6	8	6	7	6	6	8	6	6	5	7	6	6	6	7	7	6	8	8	5	9	6	8	8	6	7	9	7	6	5	6	6	4
O43307-3;O43307-2;O43307;Q96N96-5;Q96N96-2;Q96N96-3;Q96N96-4;Q96N96;Q96N96-6	O43307-3;O43307-2;O43307	3;3;3;1;1;1;1;1;1	3;3;3;1;1;1;1;1;1	2;2;2;0;0;0;0;0;0	Rho guanine nucleotide exchange factor 9	ARHGEF9	sp|O43307-3|ARHG9_HUMAN Isoform 3 of Rho guanine nucleotide exchange factor 9 OS=Homo sapiens OX=9606 GN=ARHGEF9;sp|O43307-2|ARHG9_HUMAN Isoform 2 of Rho guanine nucleotide exchange factor 9 OS=Homo sapiens OX=9606 GN=ARHGEF9;sp|O43307|ARHG9_HUMAN Rho guan	9	3	3	2	1	1	1	1	1	1	0	0	1	1	0	0	2	1	0	0	1	1	0	1	1	1	0	0	1	1	0	0	1	1	0	0	0	1	0	0	0	1
O43347	O43347	10	10	9	RNA-binding protein Musashi homolog 1	MSI1	sp|O43347|MSI1H_HUMAN RNA-binding protein Musashi homolog 1 OS=Homo sapiens OX=9606 GN=MSI1 PE=1 SV=1	1	10	10	9	6	7	6	7	6	6	6	7	7	6	8	9	5	7	5	8	6	5	7	9	7	6	8	7	7	5	6	7	5	6	8	8	6	5	6	6	6	5
O43390;O43390-3	O43390;O43390-3	21;18	21;18	2;2	Heterogeneous nuclear ribonucleoprotein R	HNRNPR	sp|O43390|HNRPR_HUMAN Heterogeneous nuclear ribonucleoprotein R OS=Homo sapiens OX=9606 GN=HNRNPR PE=1 SV=1;sp|O43390-3|HNRPR_HUMAN Isoform 3 of Heterogeneous nuclear ribonucleoprotein R OS=Homo sapiens OX=9606 GN=HNRNPR	2	21	21	2	7	13	12	12	9	12	11	11	11	11	11	13	9	14	11	11	11	11	9	10	11	12	11	12	13	10	11	12	13	11	13	11	10	9	12	13	10	13
O43390-2;O43390-4	O43390-2;O43390-4	20;18	1;1	1;1	Heterogeneous nuclear ribonucleoprotein R	HNRNPR	sp|O43390-2|HNRPR_HUMAN Isoform 2 of Heterogeneous nuclear ribonucleoprotein R OS=Homo sapiens OX=9606 GN=HNRNPR;sp|O43390-4|HNRPR_HUMAN Isoform 4 of Heterogeneous nuclear ribonucleoprotein R OS=Homo sapiens OX=9606 GN=HNRNPR	2	20	1	1	7	13	13	13	8	12	11	11	11	11	11	13	9	14	12	12	11	11	10	10	10	11	12	13	13	10	11	13	12	11	13	12	9	9	12	13	9	12
O43395	O43395	6	6	3	U4/U6 small nuclear ribonucleoprotein Prp3	PRPF3	sp|O43395|PRPF3_HUMAN U4/U6 small nuclear ribonucleoprotein Prp3 OS=Homo sapiens OX=9606 GN=PRPF3 PE=1 SV=2	1	6	6	3	3	0	2	2	2	2	0	1	1	1	1	1	2	2	0	1	1	1	0	3	1	1	3	1	1	1	4	1	2	1	3	3	1	2	1	1	3	2
O43396	O43396	6	6	6	Thioredoxin-like protein 1	TXNL1	sp|O43396|TXNL1_HUMAN Thioredoxin-like protein 1 OS=Homo sapiens OX=9606 GN=TXNL1 PE=1 SV=3	1	6	6	6	4	4	5	5	4	4	5	4	4	5	2	4	4	5	5	5	5	3	5	5	5	4	4	4	4	4	5	4	5	4	5	5	4	3	5	5	3	3
O43402	O43402	1	1	1	ER membrane protein complex subunit 8	EMC8	sp|O43402|EMC8_HUMAN ER membrane protein complex subunit 8 OS=Homo sapiens OX=9606 GN=EMC8 PE=1 SV=1	1	1	1	1	0	0	0	1	1	0	1	1	0	0	0	0	1	1	1	1	1	1	0	1	1	0	1	1	1	0	1	1	1	0	1	0	0	1	1	1	1	0
O43414-3;O43414-2;O43414	O43414-3;O43414-2;O43414	2;2;2	2;2;2	2;2;2	ERI1 exoribonuclease 3	ERI3	sp|O43414-3|ERI3_HUMAN Isoform 3 of ERI1 exoribonuclease 3 OS=Homo sapiens OX=9606 GN=ERI3;sp|O43414-2|ERI3_HUMAN Isoform 2 of ERI1 exoribonuclease 3 OS=Homo sapiens OX=9606 GN=ERI3;sp|O43414|ERI3_HUMAN ERI1 exoribonuclease 3 OS=Homo sapiens OX=9606 GN=ERI	3	2	2	2	0	0	0	0	1	1	0	0	0	1	0	0	0	0	0	0	1	0	0	0	0	1	0	0	0	0	0	0	0	1	0	0	1	0	0	0	0	0
O43424-2;O43424	O43424-2;O43424	5;5	5;5	5;5	Glutamate receptor ionotropic, delta-2	GRID2	sp|O43424-2|GRID2_HUMAN Isoform 2 of Glutamate receptor ionotropic, delta-2 OS=Homo sapiens OX=9606 GN=GRID2;sp|O43424|GRID2_HUMAN Glutamate receptor ionotropic, delta-2 OS=Homo sapiens OX=9606 GN=GRID2 PE=1 SV=2	2	5	5	5	0	0	0	0	0	0	0	0	1	1	0	1	1	1	1	1	1	0	1	1	1	1	0	1	1	1	1	1	0	0	1	1	0	0	0	0	0	0
O43426-4;O43426-2;O43426;O43426-5	O43426-4;O43426-2;O43426;O43426-5	10;10;10;6	10;10;10;6	10;10;10;6	Synaptojanin-1	SYNJ1	sp|O43426-4|SYNJ1_HUMAN Isoform 3 of Synaptojanin-1 OS=Homo sapiens OX=9606 GN=SYNJ1;sp|O43426-2|SYNJ1_HUMAN Isoform 2 of Synaptojanin-1 OS=Homo sapiens OX=9606 GN=SYNJ1;sp|O43426|SYNJ1_HUMAN Synaptojanin-1 OS=Homo sapiens OX=9606 GN=SYNJ1 PE=1 SV=2;sp|O43	4	10	10	10	4	4	5	3	6	4	4	4	5	3	6	6	8	6	4	5	7	6	4	4	6	7	5	3	7	6	6	6	8	6	5	5	7	5	4	2	5	6
O43427-2;O43427	O43427-2;O43427	3;3	3;3	3;3	Acidic fibroblast growth factor intracellular-binding protein	FIBP	sp|O43427-2|FIBP_HUMAN Isoform Short of Acidic fibroblast growth factor intracellular-binding protein OS=Homo sapiens OX=9606 GN=FIBP;sp|O43427|FIBP_HUMAN Acidic fibroblast growth factor intracellular-binding protein OS=Homo sapiens OX=9606 GN=FIBP PE=1 SV	2	3	3	3	0	2	2	2	1	2	2	2	3	1	1	0	1	0	2	2	2	1	1	2	1	1	2	1	1	2	0	2	3	2	2	2	1	2	2	1	1	2
O43432-4;O43432;O43432-3	O43432-4;O43432;O43432-3	7;7;7	6;6;6	6;6;6	Eukaryotic translation initiation factor 4 gamma 3	EIF4G3	sp|O43432-4|IF4G3_HUMAN Isoform 4 of Eukaryotic translation initiation factor 4 gamma 3 OS=Homo sapiens OX=9606 GN=EIF4G3;sp|O43432|IF4G3_HUMAN Eukaryotic translation initiation factor 4 gamma 3 OS=Homo sapiens OX=9606 GN=EIF4G3 PE=1 SV=2;sp|O43432-3|IF4G3	3	7	6	6	2	1	2	1	3	3	2	2	6	1	1	0	3	3	2	3	4	2	1	1	4	3	2	0	3	2	0	3	2	2	5	3	1	2	2	0	2	3
O43447;O43447-2	O43447;O43447-2	5;3	5;3	5;3	Peptidyl-prolyl cis-trans isomerase H	PPIH	sp|O43447|PPIH_HUMAN Peptidyl-prolyl cis-trans isomerase H OS=Homo sapiens OX=9606 GN=PPIH PE=1 SV=1;sp|O43447-2|PPIH_HUMAN Isoform 2 of Peptidyl-prolyl cis-trans isomerase H OS=Homo sapiens OX=9606 GN=PPIH	2	5	5	5	2	3	2	1	1	2	3	1	3	2	1	1	3	2	1	2	2	2	0	3	3	2	1	1	2	2	2	3	2	2	1	2	3	2	2	0	3	2
O43464-4;O43464-3;O43464;O43464-2	O43464-4;O43464-3;O43464;O43464-2	2;2;2;1	2;2;2;1	2;2;2;1	Serine protease HTRA2, mitochondrial	HTRA2	sp|O43464-4|HTRA2_HUMAN Isoform 4 of Serine protease HTRA2, mitochondrial OS=Homo sapiens OX=9606 GN=HTRA2;sp|O43464-3|HTRA2_HUMAN Isoform 3 of Serine protease HTRA2, mitochondrial OS=Homo sapiens OX=9606 GN=HTRA2;sp|O43464|HTRA2_HUMAN Serine protease HTRA	4	2	2	2	0	0	0	0	0	0	0	0	0	0	1	0	1	0	0	0	0	0	1	1	0	0	0	0	0	0	0	1	1	0	0	1	0	0	0	0	0	1
O43488	O43488	2	1	1	Aflatoxin B1 aldehyde reductase member 2	AKR7A2	sp|O43488|ARK72_HUMAN Aflatoxin B1 aldehyde reductase member 2 OS=Homo sapiens OX=9606 GN=AKR7A2 PE=1 SV=3	1	2	1	1	1	1	1	0	1	1	1	0	1	0	0	1	1	1	1	1	1	1	1	2	1	1	1	0	1	1	0	1	0	1	1	1	1	2	2	1	2	1
O43491;O43491-3;O43491-4;O43491-2	O43491;O43491-3;O43491-4;O43491-2	15;14;14;11	12;11;11;8	12;11;11;8	Band 4.1-like protein 2	EPB41L2	sp|O43491|E41L2_HUMAN Band 4.1-like protein 2 OS=Homo sapiens OX=9606 GN=EPB41L2 PE=1 SV=1;sp|O43491-3|E41L2_HUMAN Isoform 3 of Band 4.1-like protein 2 OS=Homo sapiens OX=9606 GN=EPB41L2;sp|O43491-4|E41L2_HUMAN Isoform 4 of Band 4.1-like protein 2 OS=Homo	4	15	12	12	11	12	10	11	11	11	9	11	7	11	11	9	11	11	9	8	11	10	8	10	12	10	10	10	11	11	11	14	11	10	13	13	11	11	12	14	9	10
Q66X52;O43504	Q66X52;O43504	4;4	4;4	4;4	Ragulator complex protein LAMTOR5	LAMTOR5	sp|Q66X52|LTOR5_PIG Ragulator complex protein LAMTOR5 OS=Sus scrofa OX=9823 GN=LAMTOR5 PE=3 SV=2;sp|O43504|LTOR5_HUMAN Ragulator complex protein LAMTOR5 OS=Homo sapiens OX=9606 GN=LAMTOR5 PE=1 SV=1	2	4	4	4	3	2	3	2	2	2	3	2	2	3	2	1	2	3	2	3	3	2	3	2	2	3	3	1	4	4	3	3	4	2	3	3	3	2	3	4	3	4
Q2F7Z4;O43513	Q2F7Z4;O43513	2;2	2;2	2;2	Mediator of RNA polymerase II transcription subunit 7	MED7	sp|Q2F7Z4|MED7_PIG Mediator of RNA polymerase II transcription subunit 7 OS=Sus scrofa OX=9823 GN=MED7 PE=2 SV=2;sp|O43513|MED7_HUMAN Mediator of RNA polymerase II transcription subunit 7 OS=Homo sapiens OX=9606 GN=MED7 PE=1 SV=1	2	2	2	2	0	0	0	0	0	0	0	1	0	0	0	0	0	0	0	0	0	0	0	1	0	0	0	0	0	0	0	0	1	0	0	0	0	1	0	0	0	0
O43581-6;O43581-5;O43581-4;O43581-3;O43581;O43581-2	O43581-6;O43581-5;O43581-4;O43581-3;O43581;O43581-2	2;2;2;2;1;1	2;2;2;2;1;1	2;2;2;2;1;1	Synaptotagmin-7	SYT7	sp|O43581-6|SYT7_HUMAN Isoform 6 of Synaptotagmin-7 OS=Homo sapiens OX=9606 GN=SYT7;sp|O43581-5|SYT7_HUMAN Isoform 5 of Synaptotagmin-7 OS=Homo sapiens OX=9606 GN=SYT7;sp|O43581-4|SYT7_HUMAN Isoform 4 of Synaptotagmin-7 OS=Homo sapiens OX=9606 GN=SYT7;sp|O	6	2	2	2	0	1	0	0	0	1	0	0	0	0	0	0	0	0	0	0	0	0	0	0	1	0	0	0	0	0	0	0	0	0	0	0	0	0	0	0	0	0
O43583	O43583	3	3	3	Density-regulated protein	DENR	sp|O43583|DENR_HUMAN Density-regulated protein OS=Homo sapiens OX=9606 GN=DENR PE=1 SV=2	1	3	3	3	2	2	2	3	2	1	2	1	2	2	2	0	2	3	2	2	2	2	1	1	2	2	2	1	3	2	2	2	1	2	1	1	1	2	1	2	2	1
O43592	O43592	5	5	5	Exportin-T	XPOT	sp|O43592|XPOT_HUMAN Exportin-T OS=Homo sapiens OX=9606 GN=XPOT PE=1 SV=2	1	5	5	5	1	1	0	2	0	1	2	1	2	0	1	1	3	2	1	2	2	2	1	1	2	0	2	2	2	1	0	1	1	0	2	2	1	2	1	1	0	0
O43602-2;O43602	O43602-2;O43602	3;3	2;2	2;2	Neuronal migration protein doublecortin	DCX	sp|O43602-2|DCX_HUMAN Isoform 2 of Neuronal migration protein doublecortin OS=Homo sapiens OX=9606 GN=DCX;sp|O43602|DCX_HUMAN Neuronal migration protein doublecortin OS=Homo sapiens OX=9606 GN=DCX PE=1 SV=4	2	3	2	2	2	0	1	1	2	2	1	0	0	0	0	1	2	0	0	0	1	1	0	0	2	2	0	0	1	0	0	0	1	0	1	1	1	1	0	0	1	2
O43615	O43615	4	4	4	Mitochondrial import inner membrane translocase subunit TIM44	TIMM44	sp|O43615|TIM44_HUMAN Mitochondrial import inner membrane translocase subunit TIM44 OS=Homo sapiens OX=9606 GN=TIMM44 PE=1 SV=2	1	4	4	4	2	0	2	1	2	1	2	1	2	2	2	2	3	1	2	2	3	2	1	1	3	2	2	2	3	2	2	2	1	1	2	2	3	1	2	1	2	0
O43617;O43617-2	O43617;O43617-2	3;2	3;2	3;2	Trafficking protein particle complex subunit 3	TRAPPC3	sp|O43617|TPPC3_HUMAN Trafficking protein particle complex subunit 3 OS=Homo sapiens OX=9606 GN=TRAPPC3 PE=1 SV=1;sp|O43617-2|TPPC3_HUMAN Isoform 2 of Trafficking protein particle complex subunit 3 OS=Homo sapiens OX=9606 GN=TRAPPC3	2	3	3	3	1	1	2	1	2	2	1	2	2	2	2	2	2	2	1	2	2	1	1	2	3	1	1	2	2	2	1	2	1	2	1	3	1	0	2	1	1	2
O43660-2;O43660	O43660-2;O43660	4;4	4;4	4;4	Pleiotropic regulator 1	PLRG1	sp|O43660-2|PLRG1_HUMAN Isoform 2 of Pleiotropic regulator 1 OS=Homo sapiens OX=9606 GN=PLRG1;sp|O43660|PLRG1_HUMAN Pleiotropic regulator 1 OS=Homo sapiens OX=9606 GN=PLRG1 PE=1 SV=1	2	4	4	4	2	2	3	3	3	1	3	3	2	1	3	3	3	1	3	3	3	3	3	2	3	2	2	2	2	3	3	2	2	3	2	4	2	3	3	3	2	2
O43670-2;O43670;O43670-4;O43670-3	O43670-2;O43670;O43670-4	3;3;3;1	3;3;3;1	3;3;3;1	BUB3-interacting and GLEBS motif-containing protein ZNF207	ZNF207	sp|O43670-2|ZN207_HUMAN Isoform 2 of BUB3-interacting and GLEBS motif-containing protein ZNF207 OS=Homo sapiens OX=9606 GN=ZNF207;sp|O43670|ZN207_HUMAN BUB3-interacting and GLEBS motif-containing protein ZNF207 OS=Homo sapiens OX=9606 GN=ZNF207 PE=1 SV=1;s	4	3	3	3	1	0	1	2	1	2	2	1	1	1	2	0	0	0	1	1	0	1	2	1	1	1	2	1	1	2	1	1	1	1	1	2	1	1	1	1	0	1
O43678-2;O43678	O43678-2;O43678	2;2	2;2	2;2	NADH dehydrogenase [ubiquinone] 1 alpha subcomplex subunit 2	NDUFA2	sp|O43678-2|NDUA2_HUMAN Isoform 2 of NADH dehydrogenase [ubiquinone] 1 alpha subcomplex subunit 2 OS=Homo sapiens OX=9606 GN=NDUFA2;sp|O43678|NDUA2_HUMAN NADH dehydrogenase [ubiquinone] 1 alpha subcomplex subunit 2 OS=Homo sapiens OX=9606 GN=NDUFA2 PE=1 SV	2	2	2	2	0	1	1	1	1	1	0	2	1	1	1	1	1	1	1	2	1	1	1	1	1	1	0	1	1	1	0	1	0	1	1	1	0	0	1	0	0	1
O43681	O43681	9	9	9	ATPase ASNA1	ASNA1	sp|O43681|GET3_HUMAN ATPase GET3 OS=Homo sapiens OX=9606 GN=GET3 PE=1 SV=2	1	9	9	9	6	6	6	6	7	6	6	6	6	6	6	6	5	6	6	4	6	6	6	5	5	6	6	6	6	6	4	5	6	6	6	5	4	5	6	6	5	5
O43684-2;O43684	O43684-2;O43684	5;5	5;5	5;5	Mitotic checkpoint protein BUB3	BUB3	sp|O43684-2|BUB3_HUMAN Isoform 2 of Mitotic checkpoint protein BUB3 OS=Homo sapiens OX=9606 GN=BUB3;sp|O43684|BUB3_HUMAN Mitotic checkpoint protein BUB3 OS=Homo sapiens OX=9606 GN=BUB3 PE=1 SV=1	2	5	5	5	4	3	3	2	1	2	3	4	2	2	3	4	2	3	3	4	4	2	3	2	3	3	2	4	3	3	3	3	4	3	4	5	3	2	2	3	3	2
O43707;O43707-2;O43707-3	O43707;O43707-2	37;24;18	37;24;18	23;15;13	Alpha-actinin-4	ACTN4	sp|O43707|ACTN4_HUMAN Alpha-actinin-4 OS=Homo sapiens OX=9606 GN=ACTN4 PE=1 SV=2;sp|O43707-2|ACTN4_HUMAN Isoform ACTN4ISO of Alpha-actinin-4 OS=Homo sapiens OX=9606 GN=ACTN4	3	37	37	23	20	18	22	22	19	19	19	16	19	19	18	21	23	18	23	18	21	19	22	21	20	18	18	17	21	19	24	24	24	21	28	27	20	23	22	23	20	23
O43719	O43719	1	1	1	HIV Tat-specific factor 1	HTATSF1	sp|O43719|HTSF1_HUMAN HIV Tat-specific factor 1 OS=Homo sapiens OX=9606 GN=HTATSF1 PE=1 SV=1	1	1	1	1	0	0	0	0	0	0	0	0	0	0	0	1	0	0	0	0	0	0	0	1	0	0	0	0	0	0	0	0	0	0	0	0	1	0	0	0	0	0
O43747;O43747-2	O43747;O43747-2	10;10	10;10	10;10	AP-1 complex subunit gamma-1	AP1G1	sp|O43747|AP1G1_HUMAN AP-1 complex subunit gamma-1 OS=Homo sapiens OX=9606 GN=AP1G1 PE=1 SV=5;sp|O43747-2|AP1G1_HUMAN Isoform 2 of AP-1 complex subunit gamma-1 OS=Homo sapiens OX=9606 GN=AP1G1	2	10	10	10	6	6	6	3	5	6	7	5	7	4	6	4	7	6	5	5	6	6	4	4	5	5	4	5	6	5	5	6	4	6	6	6	6	4	6	3	6	5
O43759-2;O43759	O43759-2;O43759	1;1	1;1	1;1	Synaptogyrin-1	SYNGR1	sp|O43759-2|SNG1_HUMAN Isoform 1B of Synaptogyrin-1 OS=Homo sapiens OX=9606 GN=SYNGR1;sp|O43759|SNG1_HUMAN Synaptogyrin-1 OS=Homo sapiens OX=9606 GN=SYNGR1 PE=1 SV=2	2	1	1	1	1	1	1	1	1	1	1	0	1	1	1	1	0	1	1	1	1	1	1	1	1	1	1	1	1	1	1	1	1	1	1	1	1	1	1	1	1	1
O43765	O43765	2	2	2	Small glutamine-rich tetratricopeptide repeat-containing protein alpha	SGTA	sp|O43765|SGTA_HUMAN Small glutamine-rich tetratricopeptide repeat-containing protein alpha OS=Homo sapiens OX=9606 GN=SGTA PE=1 SV=1	1	2	2	2	1	0	0	0	0	2	0	0	0	1	0	0	0	1	0	1	0	0	0	0	0	0	0	0	1	0	0	0	0	0	0	1	1	0	0	0	0	0
P68211;O43768-6;O43768-5;O43768-2;O43768;O43768-9;O43768-7;O43768-3;O43768-4;O43768-8	P68211;O43768-6;O43768-5;O43768-2;O43768;O43768-9;O43768-7;O43768-3;O43768-4	3;3;3;3;3;3;3;3;3;1	3;3;3;3;3;3;3;3;3;1	2;2;2;2;2;2;2;2;2;1	Alpha-endosulfine	ENSA	sp|P68211|ENSA_PIG Alpha-endosulfine OS=Sus scrofa OX=9823 GN=ENSA PE=1 SV=1;sp|O43768-6|ENSA_HUMAN Isoform 6 of Alpha-endosulfine OS=Homo sapiens OX=9606 GN=ENSA;sp|O43768-5|ENSA_HUMAN Isoform 5 of Alpha-endosulfine OS=Homo sapiens OX=9606 GN=ENSA;sp|O437	10	3	3	2	1	1	1	1	1	1	2	1	1	1	1	1	1	1	1	1	1	1	1	1	1	2	1	1	1	1	1	1	1	1	1	1	1	1	1	1	1	2
O43772	O43772	1	1	1	Mitochondrial carnitine/acylcarnitine carrier protein	SLC25A20	sp|O43772|MCAT_HUMAN Mitochondrial carnitine/acylcarnitine carrier protein OS=Homo sapiens OX=9606 GN=SLC25A20 PE=1 SV=1	1	1	1	1	1	1	0	0	1	0	0	1	1	0	0	0	1	1	0	0	1	1	1	1	1	1	0	1	1	1	1	0	1	0	1	1	1	1	0	0	1	1
O43776;O43776-2	O43776	9;1	9;1	9;1	Asparagine--tRNA ligase, cytoplasmic	NARS	sp|O43776|SYNC_HUMAN Asparagine--tRNA ligase, cytoplasmic OS=Homo sapiens OX=9606 GN=NARS1 PE=1 SV=1	2	9	9	9	7	6	5	7	8	6	6	7	7	7	6	8	7	6	7	7	6	7	6	7	7	7	6	7	8	6	6	8	7	6	6	7	6	7	8	6	7	7
O43795;O43795-2;Q9UBC5	O43795;O43795-2	5;5;1	5;5;1	5;5;1	Unconventional myosin-Ib	MYO1B	sp|O43795|MYO1B_HUMAN Unconventional myosin-Ib OS=Homo sapiens OX=9606 GN=MYO1B PE=1 SV=3;sp|O43795-2|MYO1B_HUMAN Isoform 2 of Unconventional myosin-Ib OS=Homo sapiens OX=9606 GN=MYO1B	3	5	5	5	1	2	1	1	2	1	0	1	0	1	2	2	1	2	1	1	2	1	0	1	3	1	1	1	1	1	2	3	3	0	3	2	1	2	2	0	2	1
O43809	O43809	7	7	7	Cleavage and polyadenylation specificity factor subunit 5	NUDT21	sp|O43809|CPSF5_HUMAN Cleavage and polyadenylation specificity factor subunit 5 OS=Homo sapiens OX=9606 GN=NUDT21 PE=1 SV=1	1	7	7	7	3	2	3	4	3	3	3	4	2	3	3	3	3	3	4	4	2	3	4	4	3	2	3	3	3	3	4	3	3	4	3	5	2	1	2	5	2	3
O43813	O43813	1	1	1	LanC-like protein 1	LANCL1	sp|O43813|LANC1_HUMAN Glutathione S-transferase LANCL1 OS=Homo sapiens OX=9606 GN=LANCL1 PE=1 SV=1	1	1	1	1	1	1	1	1	0	1	1	1	0	1	1	1	0	1	1	1	0	1	1	1	1	1	1	1	1	1	1	1	1	1	1	1	1	1	1	1	1	1
O43815;O43815-2	O43815;O43815-2	9;7	9;7	9;7	Striatin	STRN	sp|O43815|STRN_HUMAN Striatin OS=Homo sapiens OX=9606 GN=STRN PE=1 SV=4;sp|O43815-2|STRN_HUMAN Isoform 2 of Striatin OS=Homo sapiens OX=9606 GN=STRN	2	9	9	9	4	3	1	2	0	1	3	2	2	2	3	3	2	2	2	2	2	2	4	2	0	1	3	2	1	2	2	5	1	3	2	2	4	1	3	2	2	1
O43826;O43826-2	O43826;O43826-2	3;3	3;3	3;3	Glucose-6-phosphate translocase	SLC37A4	sp|O43826|G6PT1_HUMAN Glucose-6-phosphate exchanger SLC37A4 OS=Homo sapiens OX=9606 GN=SLC37A4 PE=1 SV=1;sp|O43826-2|G6PT1_HUMAN Isoform 2 of Glucose-6-phosphate exchanger SLC37A4 OS=Homo sapiens OX=9606 GN=SLC37A4	2	3	3	3	0	1	2	1	1	1	1	0	2	1	0	0	1	1	1	0	2	1	1	3	0	2	2	0	0	1	3	2	1	0	1	2	0	2	3	2	0	0
O43837;O43837-2;O43837-3	O43837;O43837-2;O43837-3	8;7;4	8;7;4	7;6;3	Isocitrate dehydrogenase [NAD] subunit beta, mitochondrial	IDH3B	sp|O43837|IDH3B_HUMAN Isocitrate dehydrogenase [NAD] subunit beta, mitochondrial OS=Homo sapiens OX=9606 GN=IDH3B PE=1 SV=2;sp|O43837-2|IDH3B_HUMAN Isoform A of Isocitrate dehydrogenase [NAD] subunit beta, mitochondrial OS=Homo sapiens OX=9606 GN=IDH3B;sp|	3	8	8	7	5	5	4	4	5	5	5	5	5	5	4	5	5	4	4	3	6	5	4	4	4	4	4	4	6	5	5	4	5	5	5	4	4	4	5	5	5	4
O43847;O43847-2	O43847;O43847-2	3;3	3;3	3;3	Nardilysin	NRD1	sp|O43847|NRDC_HUMAN Nardilysin OS=Homo sapiens OX=9606 GN=NRDC PE=1 SV=3;sp|O43847-2|NRDC_HUMAN Isoform 2 of Nardilysin OS=Homo sapiens OX=9606 GN=NRDC	2	3	3	3	0	0	0	0	0	0	0	0	0	0	0	0	0	0	0	0	0	0	0	1	0	0	1	0	0	0	0	1	0	1	0	0	0	0	0	0	1	0
O43852;O43852-3;O43852-6;O43852-5;O43852-10;O43852-2;O43852-4;O43852-15;O43852-13;O43852-14;O43852-9;O43852-11;O43852-8;O43852-12;O43852-7	O43852;O43852-3;O43852-6;O43852-5;O43852-10;O43852-2;O43852-4;O43852-15	11;11;9;8;7;7;7;6;5;5;5;5;3;1;1	11;11;9;8;7;7;7;6;5;5;5;5;3;1;1	11;11;9;8;7;7;7;6;5;5;5;5;3;1;1	Calumenin	CALU	sp|O43852|CALU_HUMAN Calumenin OS=Homo sapiens OX=9606 GN=CALU PE=1 SV=2;sp|O43852-3|CALU_HUMAN Isoform 3 of Calumenin OS=Homo sapiens OX=9606 GN=CALU;sp|O43852-6|CALU_HUMAN Isoform 6 of Calumenin OS=Homo sapiens OX=9606 GN=CALU;sp|O43852-5|CALU_HUMAN Isof	15	11	11	11	9	8	10	8	8	9	8	9	7	6	8	7	9	7	8	8	8	8	6	8	8	9	8	6	7	8	7	7	7	7	9	10	9	7	10	7	9	8
O43865;O43865-2	O43865;O43865-2	12;8	7;3	7;3	Putative adenosylhomocysteinase 2	AHCYL1	sp|O43865|SAHH2_HUMAN S-adenosylhomocysteine hydrolase-like protein 1 OS=Homo sapiens OX=9606 GN=AHCYL1 PE=1 SV=2;sp|O43865-2|SAHH2_HUMAN Isoform 2 of S-adenosylhomocysteine hydrolase-like protein 1 OS=Homo sapiens OX=9606 GN=AHCYL1	2	12	7	7	4	5	7	7	5	4	5	6	4	2	7	3	4	4	5	6	4	5	5	5	4	6	5	6	4	7	4	7	5	7	8	6	3	5	4	5	4	3
O43913-2;O43913	O43913-2;O43913	1;1	1;1	1;1	Origin recognition complex subunit 5	ORC5	sp|O43913-2|ORC5_HUMAN Isoform 2 of Origin recognition complex subunit 5 OS=Homo sapiens OX=9606 GN=ORC5;sp|O43913|ORC5_HUMAN Origin recognition complex subunit 5 OS=Homo sapiens OX=9606 GN=ORC5 PE=1 SV=1	2	1	1	1	1	0	0	0	0	0	0	0	0	0	0	0	0	0	0	0	0	0	0	0	0	0	0	0	0	0	0	0	0	0	0	0	0	0	0	0	0	0
O43924	O43924	3	3	3	Retinal rod rhodopsin-sensitive cGMP 3,5-cyclic phosphodiesterase subunit delta	PDE6D	sp|O43924|PDE6D_HUMAN Retinal rod rhodopsin-sensitive cGMP 3,5-cyclic phosphodiesterase subunit delta OS=Homo sapiens OX=9606 GN=PDE6D PE=1 SV=1	1	3	3	3	2	2	2	2	2	2	1	1	2	2	1	2	2	2	2	1	2	2	1	1	2	2	1	1	2	2	1	1	3	2	2	1	2	2	1	1	2	2
O46420;Q16850;Q16850-2	O46420;Q16850	4;2;1	4;2;1	4;2;1	Lanosterol 14-alpha demethylase	CYP51A1	sp|O46420|CP51A_PIG Lanosterol 14-alpha demethylase OS=Sus scrofa OX=9823 GN=CYP51A1 PE=2 SV=1;sp|Q16850|CP51A_HUMAN Lanosterol 14-alpha demethylase OS=Homo sapiens OX=9606 GN=CYP51A1 PE=1 SV=3	3	4	4	4	0	2	0	1	0	1	0	1	0	0	1	0	1	0	0	0	0	0	0	2	0	0	0	0	0	1	1	2	0	1	1	2	1	1	2	1	1	0
O46427	O46427	1	1	1			sp|O46427|CATH_PIG Pro-cathepsin H OS=Sus scrofa OX=9823 GN=CTSH PE=1 SV=1	1	1	1	1	0	0	0	0	0	0	0	0	0	0	0	0	0	0	0	0	0	0	0	0	0	0	0	0	0	0	0	0	0	0	0	0	0	0	0	0	0	0
O46560	O46560	10	10	10			sp|O46560|PDXK_PIG Pyridoxal kinase OS=Sus scrofa OX=9823 GN=PDXK PE=1 SV=1	1	10	10	10	4	5	4	3	2	1	5	3	5	3	2	4	2	5	3	3	2	4	4	2	6	4	3	4	6	4	4	5	6	4	2	5	4	4	4	5	5	3
O60216;Q9H4I0	O60216	11;1	11;1	11;1	Double-strand-break repair protein rad21 homolog	RAD21	sp|O60216|RAD21_HUMAN Double-strand-break repair protein rad21 homolog OS=Homo sapiens OX=9606 GN=RAD21 PE=1 SV=2	2	11	11	11	5	4	5	2	5	3	5	4	3	5	3	2	4	3	6	3	3	3	4	4	5	2	6	5	4	3	4	4	3	4	5	4	3	3	4	3	1	2
O60220	O60220	1	1	1	Mitochondrial import inner membrane translocase subunit Tim8 A	TIMM8A	sp|O60220|TIM8A_HUMAN Mitochondrial import inner membrane translocase subunit Tim8 A OS=Homo sapiens OX=9606 GN=TIMM8A PE=1 SV=1	1	1	1	1	0	0	0	0	0	0	0	0	0	0	0	0	0	0	0	1	0	0	0	0	0	0	0	0	0	0	0	0	0	0	0	1	0	0	0	0	1	0
O60232	O60232	2	2	2	Sjoegren syndrome/scleroderma autoantigen 1	SSSCA1	sp|O60232|ZNRD2_HUMAN Protein ZNRD2 OS=Homo sapiens OX=9606 GN=ZNRD2 PE=1 SV=1	1	2	2	2	0	1	1	0	0	0	1	1	1	0	1	1	1	0	1	2	0	0	1	1	0	0	0	0	1	0	0	1	1	0	0	0	0	1	1	0	0	0
O60234	O60234	2	1	1	Glia maturation factor gamma	GMFG	sp|O60234|GMFG_HUMAN Glia maturation factor gamma OS=Homo sapiens OX=9606 GN=GMFG PE=1 SV=1	1	2	1	1	0	0	0	0	1	0	0	0	0	0	0	0	0	0	1	0	1	1	1	0	1	0	0	0	1	0	1	1	0	0	0	1	0	1	1	0	1	1
O60245;O60245-2	O60245;O60245-2	2;2	2;2	2;2	Protocadherin-7	PCDH7	sp|O60245|PCDH7_HUMAN Protocadherin-7 OS=Homo sapiens OX=9606 GN=PCDH7 PE=1 SV=2;sp|O60245-2|PCDH7_HUMAN Isoform B of Protocadherin-7 OS=Homo sapiens OX=9606 GN=PCDH7	2	2	2	2	1	2	2	2	2	2	1	0	1	1	1	1	2	1	2	1	2	1	1	0	0	1	2	0	2	2	2	1	1	2	2	1	1	1	1	1	1	1
O60256;O60256-3;O60256-2;O60256-4	O60256;O60256-3;O60256-2;O60256-4	7;6;6;5	6;5;5;4	6;5;5;4	Phosphoribosyl pyrophosphate synthase-associated protein 2	PRPSAP2	sp|O60256|KPRB_HUMAN Phosphoribosyl pyrophosphate synthase-associated protein 2 OS=Homo sapiens OX=9606 GN=PRPSAP2 PE=1 SV=1;sp|O60256-3|KPRB_HUMAN Isoform 3 of Phosphoribosyl pyrophosphate synthase-associated protein 2 OS=Homo sapiens OX=9606 GN=PRPSAP2;s	4	7	6	6	2	2	3	4	3	3	3	3	4	4	3	2	2	2	2	5	4	4	2	3	2	3	4	3	1	5	4	5	3	4	3	5	2	3	4	2	2	2
O60262	O60262	1	1	1	Guanine nucleotide-binding protein G(I)/G(S)/G(O) subunit gamma-7	GNG7	sp|O60262|GBG7_HUMAN Guanine nucleotide-binding protein G(I)/G(S)/G(O) subunit gamma-7 OS=Homo sapiens OX=9606 GN=GNG7 PE=1 SV=1	1	1	1	1	0	1	0	0	0	0	0	0	0	0	0	0	0	0	0	0	0	0	0	0	0	0	0	0	0	0	0	0	0	0	0	0	0	0	0	0	1	1
O60264	O60264	9	9	8	SWI/SNF-related matrix-associated actin-dependent regulator of chromatin subfamily A member 5	SMARCA5	sp|O60264|SMCA5_HUMAN SWI/SNF-related matrix-associated actin-dependent regulator of chromatin subfamily A member 5 OS=Homo sapiens OX=9606 GN=SMARCA5 PE=1 SV=1	1	9	9	8	4	5	2	2	4	5	2	2	3	4	3	2	3	3	1	3	2	4	2	3	4	3	2	4	8	4	5	1	4	2	3	2	5	3	3	3	3	5
O60268;O60268-3;O60268-2	O60268;O60268-3;O60268-2	2;2;1	2;2;1	2;2;1	Uncharacterized protein KIAA0513	KIAA0513	sp|O60268|K0513_HUMAN Uncharacterized protein KIAA0513 OS=Homo sapiens OX=9606 GN=KIAA0513 PE=1 SV=1;sp|O60268-3|K0513_HUMAN Isoform 3 of Uncharacterized protein KIAA0513 OS=Homo sapiens OX=9606 GN=KIAA0513;sp|O60268-2|K0513_HUMAN Isoform 2 of Uncharacteri	3	2	2	2	0	1	0	0	1	0	1	1	0	0	1	1	0	0	1	1	0	0	0	1	0	2	2	2	0	0	0	1	1	1	1	2	0	1	0	0	0	1
O60271-4;O60271;O60271-9;O60271-2;O60271-5;O60271-3	O60271-4;O60271;O60271-9;O60271-2;O60271-5;O60271-3	10;10;9;9;8;8	10;10;9;9;8;8	10;10;9;9;8;8	C-Jun-amino-terminal kinase-interacting protein 4	SPAG9	sp|O60271-4|JIP4_HUMAN Isoform 4 of C-Jun-amino-terminal kinase-interacting protein 4 OS=Homo sapiens OX=9606 GN=SPAG9;sp|O60271|JIP4_HUMAN C-Jun-amino-terminal kinase-interacting protein 4 OS=Homo sapiens OX=9606 GN=SPAG9 PE=1 SV=4;sp|O60271-9|JIP4_HUMAN	6	10	10	10	4	2	2	0	3	2	1	1	1	0	1	2	3	3	2	1	4	2	1	1	1	1	1	1	2	2	1	1	1	0	2	3	2	1	1	1	1	2
O60282;O60282-2	O60282;O60282-2	16;9	11;6	9;5	Kinesin heavy chain isoform 5C	KIF5C	sp|O60282|KIF5C_HUMAN Kinesin heavy chain isoform 5C OS=Homo sapiens OX=9606 GN=KIF5C PE=1 SV=1;sp|O60282-2|KIF5C_HUMAN Isoform 2 of Kinesin heavy chain isoform 5C OS=Homo sapiens OX=9606 GN=KIF5C	2	16	11	9	10	9	6	6	10	10	7	6	10	6	6	5	11	10	6	7	8	8	7	7	9	9	6	8	10	5	9	5	11	6	8	7	11	10	10	9	9	6
O60291-4;O60291;O60291-3;O60291-2	O60291-4;O60291;O60291-3;O60291-2	3;3;3;3	3;3;3;3	3;3;3;3	E3 ubiquitin-protein ligase MGRN1	MGRN1	sp|O60291-4|MGRN1_HUMAN Isoform 4 of E3 ubiquitin-protein ligase MGRN1 OS=Homo sapiens OX=9606 GN=MGRN1;sp|O60291|MGRN1_HUMAN E3 ubiquitin-protein ligase MGRN1 OS=Homo sapiens OX=9606 GN=MGRN1 PE=1 SV=2;sp|O60291-3|MGRN1_HUMAN Isoform 3 of E3 ubiquitin-pro	4	3	3	3	0	0	0	0	1	0	0	0	0	0	0	0	1	0	1	0	1	0	0	0	0	2	0	0	0	0	0	0	0	0	0	0	1	0	0	0	0	0
O60292	O60292	3	3	3	Signal-induced proliferation-associated 1-like protein 3	SIPA1L3	sp|O60292|SI1L3_HUMAN Signal-induced proliferation-associated 1-like protein 3 OS=Homo sapiens OX=9606 GN=SIPA1L3 PE=1 SV=3	1	3	3	3	0	0	1	0	0	0	0	0	0	0	0	0	0	0	0	0	0	1	0	0	0	0	0	0	0	0	0	0	0	0	0	0	0	1	0	0	0	0
O60306	O60306	4	4	4	Intron-binding protein aquarius	AQR	sp|O60306|AQR_HUMAN RNA helicase aquarius OS=Homo sapiens OX=9606 GN=AQR PE=1 SV=4	1	4	4	4	1	2	1	1	1	1	1	1	2	1	0	0	2	0	1	1	2	0	1	0	2	0	0	1	2	1	0	1	2	0	1	1	1	2	1	0	1	0
O60313-13;O60313;O60313-9;O60313-11;O60313-2;O60313-10	O60313-13;O60313;O60313-9;O60313-11;O60313-2;O60313-10	15;15;15;15;15;15	15;15;15;15;15;15	15;15;15;15;15;15	Dynamin-like 120 kDa protein, mitochondrial;Dynamin-like 120 kDa protein, form S1	OPA1	sp|O60313-13|OPA1_HUMAN Isoform 7 of Dynamin-like 120 kDa protein, mitochondrial OS=Homo sapiens OX=9606 GN=OPA1;sp|O60313|OPA1_HUMAN Dynamin-like 120 kDa protein, mitochondrial OS=Homo sapiens OX=9606 GN=OPA1 PE=1 SV=3;sp|O60313-9|OPA1_HUMAN Isoform 3 of	6	15	15	15	5	7	6	5	5	5	6	5	4	4	4	6	7	6	6	5	7	8	3	6	7	7	7	6	5	6	5	6	8	6	8	8	6	7	4	6	7	6
O60331-4;O60331;O60331-2;O60331-3;O14986-3;O14986;O14986-2	O60331-4;O60331;O60331-2;O60331-3;O14986-3;O14986;O14986-2	2;2;2;2;1;1;1	1;1;1;1;0;0;0	1;1;1;1;0;0;0	Phosphatidylinositol 4-phosphate 5-kinase type-1 gamma;Phosphatidylinositol 4-phosphate 5-kinase type-1 beta	PIP5K1C;PIP5K1B	sp|O60331-4|PI51C_HUMAN Isoform 4 of Phosphatidylinositol 4-phosphate 5-kinase type-1 gamma OS=Homo sapiens OX=9606 GN=PIP5K1C;sp|O60331|PI51C_HUMAN Phosphatidylinositol 4-phosphate 5-kinase type-1 gamma OS=Homo sapiens OX=9606 GN=PIP5K1C PE=1 SV=2;sp|O603	7	2	1	1	1	0	1	0	2	0	0	1	1	0	0	0	1	1	0	0	1	1	0	1	1	1	0	0	1	0	0	1	1	0	0	0	0	0	1	0	1	0
O60333-2;O60333;O60333-4;O60333-3	O60333-2;O60333;O60333-4;O60333-3	8;8;8;5	4;4;4;1	4;4;4;1	Kinesin-like protein KIF1B	KIF1B	sp|O60333-2|KIF1B_HUMAN Isoform 2 of Kinesin-like protein KIF1B OS=Homo sapiens OX=9606 GN=KIF1B;sp|O60333|KIF1B_HUMAN Kinesin-like protein KIF1B OS=Homo sapiens OX=9606 GN=KIF1B PE=1 SV=5;sp|O60333-4|KIF1B_HUMAN Isoform 4 of Kinesin-like protein KIF1B OS=	4	8	4	4	2	2	3	4	4	3	3	4	4	2	3	1	3	3	4	3	4	2	1	2	3	2	4	3	5	3	4	3	3	3	4	3	3	3	3	3	5	4
O60341;O60341-2	O60341;O60341-2	10;10	10;10	10;10	Lysine-specific histone demethylase 1A	KDM1A	sp|O60341|KDM1A_HUMAN Lysine-specific histone demethylase 1A OS=Homo sapiens OX=9606 GN=KDM1A PE=1 SV=2;sp|O60341-2|KDM1A_HUMAN Isoform 2 of Lysine-specific histone demethylase 1A OS=Homo sapiens OX=9606 GN=KDM1A	2	10	10	10	3	1	3	4	2	2	3	2	1	3	2	3	2	3	2	3	3	5	3	3	1	3	3	3	3	5	4	1	0	3	4	4	3	4	4	2	3	2
O60443	O60443	1	1	1	Non-syndromic hearing impairment protein 5	DFNA5	sp|O60443|GSDME_HUMAN Gasdermin-E OS=Homo sapiens OX=9606 GN=GSDME PE=1 SV=2	1	1	1	1	0	0	0	0	0	0	0	0	0	0	0	0	1	1	0	1	1	0	0	1	1	0	1	1	1	0	1	1	0	0	0	1	0	0	0	0	0	0
O60476	O60476	1	1	1	Mannosyl-oligosaccharide 1,2-alpha-mannosidase IB	MAN1A2	sp|O60476|MA1A2_HUMAN Mannosyl-oligosaccharide 1,2-alpha-mannosidase IB OS=Homo sapiens OX=9606 GN=MAN1A2 PE=1 SV=1	1	1	1	1	1	0	0	0	0	1	0	0	1	0	0	0	0	0	1	0	1	0	0	0	0	0	0	0	1	0	0	0	0	0	0	0	0	0	0	0	0	0
O60488-2;O60488	O60488-2;O60488	2;2	1;1	1;1	Long-chain-fatty-acid--CoA ligase 4	ACSL4	sp|O60488-2|ACSL4_HUMAN Isoform Short of Long-chain-fatty-acid--CoA ligase 4 OS=Homo sapiens OX=9606 GN=ACSL4;sp|O60488|ACSL4_HUMAN Long-chain-fatty-acid--CoA ligase 4 OS=Homo sapiens OX=9606 GN=ACSL4 PE=1 SV=2	2	2	1	1	2	1	1	1	1	1	1	1	1	1	0	1	1	1	1	1	1	1	1	1	1	1	1	1	1	1	1	1	1	1	1	1	1	1	1	1	2	1
O60493;O60493-2;O60493-4;O60493-3	O60493;O60493-2;O60493-4;O60493-3	4;3;3;2	4;3;3;2	4;3;3;2	Sorting nexin-3	SNX3	sp|O60493|SNX3_HUMAN Sorting nexin-3 OS=Homo sapiens OX=9606 GN=SNX3 PE=1 SV=3;sp|O60493-2|SNX3_HUMAN Isoform 2 of Sorting nexin-3 OS=Homo sapiens OX=9606 GN=SNX3;sp|O60493-4|SNX3_HUMAN Isoform 4 of Sorting nexin-3 OS=Homo sapiens OX=9606 GN=SNX3;sp|O60493	4	4	4	4	2	2	2	2	2	1	2	2	2	1	1	1	2	2	2	2	2	2	2	2	2	2	3	2	2	1	2	3	2	1	3	3	2	1	2	2	3	3
O60502;O60502-4;O60502-2;O60502-3	O60502;O60502-4;O60502-2;O60502-3	12;11;10;7	12;11;10;7	12;11;10;7	Protein O-GlcNAcase	MGEA5	sp|O60502|OGA_HUMAN Protein O-GlcNAcase OS=Homo sapiens OX=9606 GN=OGA PE=1 SV=2;sp|O60502-4|OGA_HUMAN Isoform 4 of Protein O-GlcNAcase OS=Homo sapiens OX=9606 GN=OGA;sp|O60502-2|OGA_HUMAN Isoform 2 of Protein O-GlcNAcase OS=Homo sapiens OX=9606 GN=OGA;sp|	4	12	12	12	2	4	3	3	3	4	4	3	4	3	5	4	4	3	4	4	3	3	4	3	3	3	4	5	3	2	4	3	4	3	4	4	3	4	3	3	4	4
O60504;O60504-2	O60504;O60504-2	3;2	3;2	3;2	Vinexin	SORBS3	sp|O60504|VINEX_HUMAN Vinexin OS=Homo sapiens OX=9606 GN=SORBS3 PE=1 SV=2;sp|O60504-2|VINEX_HUMAN Isoform Beta of Vinexin OS=Homo sapiens OX=9606 GN=SORBS3	2	3	3	3	0	0	0	0	0	0	0	1	0	0	0	0	0	0	0	1	0	0	0	0	0	0	0	0	0	0	0	0	1	0	0	1	0	0	1	0	0	0
O60506;O60506-3;O60506-2;O60506-4;O60506-5	O60506;O60506-3;O60506-2;O60506-4;O60506-5	17;16;16;15;10	12;11;11;10;7	12;11;11;10;7	Heterogeneous nuclear ribonucleoprotein Q	SYNCRIP	sp|O60506|HNRPQ_HUMAN Heterogeneous nuclear ribonucleoprotein Q OS=Homo sapiens OX=9606 GN=SYNCRIP PE=1 SV=2;sp|O60506-3|HNRPQ_HUMAN Isoform 3 of Heterogeneous nuclear ribonucleoprotein Q OS=Homo sapiens OX=9606 GN=SYNCRIP;sp|O60506-2|HNRPQ_HUMAN Isoform 2	5	17	12	12	8	14	12	11	11	10	13	10	10	12	11	13	10	13	11	10	10	10	9	9	11	13	11	15	12	12	9	14	14	11	14	12	9	9	11	10	11	12
O60508	O60508	4	4	4	Pre-mRNA-processing factor 17	CDC40	sp|O60508|PRP17_HUMAN Pre-mRNA-processing factor 17 OS=Homo sapiens OX=9606 GN=CDC40 PE=1 SV=1	1	4	4	4	2	0	0	0	0	0	1	1	0	0	0	0	0	0	0	1	0	0	1	2	0	0	1	1	1	0	1	0	1	0	0	1	1	1	1	0	0	0
O60518	O60518	7	5	5	Ran-binding protein 6	RANBP6	sp|O60518|RNBP6_HUMAN Ran-binding protein 6 OS=Homo sapiens OX=9606 GN=RANBP6 PE=1 SV=2	1	7	5	5	2	1	0	1	2	1	0	1	2	0	1	1	3	2	1	1	1	2	0	0	2	2	0	0	1	1	1	2	2	0	0	1	1	2	1	1	1	1
O60547-2;O60547	O60547-2;O60547	3;3	3;3	3;3	GDP-mannose 4,6 dehydratase	GMDS	sp|O60547-2|GMDS_HUMAN Isoform 2 of GDP-mannose 4,6 dehydratase OS=Homo sapiens OX=9606 GN=GMDS;sp|O60547|GMDS_HUMAN GDP-mannose 4,6 dehydratase OS=Homo sapiens OX=9606 GN=GMDS PE=1 SV=1	2	3	3	3	1	2	1	1	3	1	1	1	2	1	2	0	3	1	0	2	2	0	0	2	2	1	2	2	1	2	1	2	2	1	1	2	3	1	1	2	1	1
O60568	O60568	2	2	2	Procollagen-lysine,2-oxoglutarate 5-dioxygenase 3	PLOD3	sp|O60568|PLOD3_HUMAN Multifunctional procollagen lysine hydroxylase and glycosyltransferase LH3 OS=Homo sapiens OX=9606 GN=PLOD3 PE=1 SV=1	1	2	2	2	0	0	0	0	0	0	0	0	1	0	0	0	0	1	0	0	0	1	0	0	0	0	0	1	0	0	0	0	1	0	0	1	1	0	0	0	1	0
O60610;O60610-2;O60610-3	O60610;O60610-2;O60610-3	6;5;5	6;5;5	6;5;5	Protein diaphanous homolog 1	DIAPH1	sp|O60610|DIAP1_HUMAN Protein diaphanous homolog 1 OS=Homo sapiens OX=9606 GN=DIAPH1 PE=1 SV=2;sp|O60610-2|DIAP1_HUMAN Isoform 2 of Protein diaphanous homolog 1 OS=Homo sapiens OX=9606 GN=DIAPH1;sp|O60610-3|DIAP1_HUMAN Isoform 3 of Protein diaphanous homol	3	6	6	6	1	1	1	2	1	1	1	0	2	0	1	1	1	2	2	2	1	3	1	2	1	0	1	2	2	1	1	2	2	1	1	2	2	2	1	2	1	1
O60641-4;O60641;O60641-3;O60641-2	O60641-4;O60641;O60641-3	11;11;9;1	11;11;9;1	9;9;7;1	Clathrin coat assembly protein AP180	SNAP91	sp|O60641-4|AP180_HUMAN Isoform 4 of Clathrin coat assembly protein AP180 OS=Homo sapiens OX=9606 GN=SNAP91;sp|O60641|AP180_HUMAN Clathrin coat assembly protein AP180 OS=Homo sapiens OX=9606 GN=SNAP91 PE=1 SV=2;sp|O60641-3|AP180_HUMAN Isoform 3 of Clathrin	4	11	11	9	6	7	5	7	6	5	6	6	4	6	6	6	5	6	6	7	5	7	7	5	5	9	9	8	5	4	6	6	8	7	8	9	4	5	5	5	4	7
O60684	O60684	6	2	1	Importin subunit alpha-7	KPNA6	sp|O60684|IMA7_HUMAN Importin subunit alpha-7 OS=Homo sapiens OX=9606 GN=KPNA6 PE=1 SV=1	1	6	2	1	3	4	4	3	4	4	3	3	4	4	4	2	4	4	4	3	4	3	3	3	3	5	3	3	4	6	3	3	4	3	3	4	4	4	3	4	4	3
O60701;O60701-2;O60701-3	O60701;O60701-2;O60701-3	7;7;5	7;7;5	7;7;5	UDP-glucose 6-dehydrogenase	UGDH	sp|O60701|UGDH_HUMAN UDP-glucose 6-dehydrogenase OS=Homo sapiens OX=9606 GN=UGDH PE=1 SV=1;sp|O60701-2|UGDH_HUMAN Isoform 2 of UDP-glucose 6-dehydrogenase OS=Homo sapiens OX=9606 GN=UGDH;sp|O60701-3|UGDH_HUMAN Isoform 3 of UDP-glucose 6-dehydrogenase OS=Ho	3	7	7	7	1	2	1	1	1	0	0	0	1	1	0	0	3	1	2	0	0	2	1	1	2	1	1	1	1	0	1	2	1	0	1	1	2	1	2	1	0	0
O60716;O60716-17;O60716-2;O60716-4;O60716-6;O60716-3;O60716-5;O60716-7;O60716-9;O60716-8;O60716-10;O60716-12;O60716-14;O60716-11;O60716-13;O60716-15;O60716-18;O60716-16;O60716-20;O60716-22;O60716-19;O60716-21;O60716-23;O60716-24;O60716-31;O60716-25;O60716-26;O60716-28;O60716-30;O60716-27;O60716-29;O60716-32	O60716;O60716-17;O60716-2;O60716-4;O60716-6;O60716-3;O60716-5;O60716-7;O60716-9;O60716-8;O60716-10;O60716-12;O60716-14;O60716-11;O60716-13;O60716-15;O60716-18;O60716-16;O60716-20;O60716-22;O60716-19;O60716-21;O60716-23;O60716-24;O60716-31;O60716-25;O60716-26;O60716-28;O60716-30;O60716-27;O60716-29;O60716-32	10;10;10;10;10;10;10;10;10;10;10;10;10;10;10;10;10;10;10;10;10;10;10;10;9;9;9;9;9;9;9;9	10;10;10;10;10;10;10;10;10;10;10;10;10;10;10;10;10;10;10;10;10;10;10;10;9;9;9;9;9;9;9;9	10;10;10;10;10;10;10;10;10;10;10;10;10;10;10;10;10;10;10;10;10;10;10;10;9;9;9;9;9;9;9;9	Catenin delta-1	CTNND1	sp|O60716|CTND1_HUMAN Catenin delta-1 OS=Homo sapiens OX=9606 GN=CTNND1 PE=1 SV=1;sp|O60716-17|CTND1_HUMAN Isoform 3ABC of Catenin delta-1 OS=Homo sapiens OX=9606 GN=CTNND1;sp|O60716-2|CTND1_HUMAN Isoform 1AB of Catenin delta-1 OS=Homo sapiens OX=9606 GN=C	32	10	10	10	4	3	3	3	4	3	2	3	4	3	2	2	4	3	4	3	4	3	4	3	4	2	3	3	4	3	4	4	2	2	4	5	5	4	3	3	4	3
O60733-2;O60733	O60733-2;O60733	2;2	2;2	2;2	85/88 kDa calcium-independent phospholipase A2	PLA2G6	sp|O60733-2|PLPL9_HUMAN Isoform SH-iPLA2 of 85/88 kDa calcium-independent phospholipase A2 OS=Homo sapiens OX=9606 GN=PLA2G6;sp|O60733|PLPL9_HUMAN 85/88 kDa calcium-independent phospholipase A2 OS=Homo sapiens OX=9606 GN=PLA2G6 PE=1 SV=2	2	2	2	2	0	1	0	0	0	2	0	0	1	0	0	0	0	1	0	0	0	0	0	0	0	0	0	0	0	0	0	0	1	0	0	0	0	1	0	0	0	0
O60741;Q9Y3Q4	O60741	7;2	7;2	5;0	Potassium/sodium hyperpolarization-activated cyclic nucleotide-gated channel 1	HCN1	sp|O60741|HCN1_HUMAN Potassium/sodium hyperpolarization-activated cyclic nucleotide-gated channel 1 OS=Homo sapiens OX=9606 GN=HCN1 PE=1 SV=3	2	7	7	5	5	3	1	2	5	2	1	1	2	2	2	2	3	3	1	1	3	3	2	2	3	2	2	2	3	3	2	1	4	1	2	3	4	2	1	1	3	2
O60749-2;O60749	O60749-2;O60749	3;3	2;2	2;2	Sorting nexin-2	SNX2	sp|O60749-2|SNX2_HUMAN Isoform 2 of Sorting nexin-2 OS=Homo sapiens OX=9606 GN=SNX2;sp|O60749|SNX2_HUMAN Sorting nexin-2 OS=Homo sapiens OX=9606 GN=SNX2 PE=1 SV=2	2	3	2	2	1	1	1	2	2	2	1	2	2	1	2	1	2	2	2	1	2	2	1	2	2	2	2	0	2	2	1	2	2	3	1	2	2	2	1	2	2	2
O60763;O60763-2	O60763;O60763-2	12;11	12;11	12;11	General vesicular transport factor p115	USO1	sp|O60763|USO1_HUMAN General vesicular transport factor p115 OS=Homo sapiens OX=9606 GN=USO1 PE=1 SV=2;sp|O60763-2|USO1_HUMAN Isoform 2 of General vesicular transport factor p115 OS=Homo sapiens OX=9606 GN=USO1	2	12	12	12	7	2	5	5	7	6	5	4	4	5	6	5	7	5	5	5	7	6	4	6	7	2	6	6	7	5	6	4	4	6	5	8	8	5	5	3	6	5
O60784;O60784-2;O60784-4;O60784-3	O60784;O60784-2;O60784-4;O60784-3	7;6;5;4	7;6;5;4	7;6;5;4	Target of Myb protein 1	TOM1	sp|O60784|TOM1_HUMAN Target of Myb protein 1 OS=Homo sapiens OX=9606 GN=TOM1 PE=1 SV=2;sp|O60784-2|TOM1_HUMAN Isoform 2 of Target of Myb protein 1 OS=Homo sapiens OX=9606 GN=TOM1;sp|O60784-4|TOM1_HUMAN Isoform 4 of Target of Myb protein 1 OS=Homo sapiens O	4	7	7	7	4	4	2	2	3	4	2	2	3	1	3	1	3	2	3	2	3	3	2	3	1	2	2	3	4	3	2	3	3	2	4	4	2	2	3	3	5	4
Q99880;Q99879;Q99877;Q93079;Q5QNW6;P62807;P58876;P57053;O60814;Q5QNW6-2;Q96A08;A0A2R8Y619	Q99880;Q99879;Q99877;Q93079;Q5QNW6;P62807;P58876;P57053;O60814;Q5QNW6-2;Q96A08	7;7;7;7;7;7;7;7;7;7;4;2	2;2;2;2;2;2;2;2;2;2;0;0	2;2;2;2;2;2;2;2;2;2;0;0	Histone H2B type 1-L;Histone H2B type 1-M;Histone H2B type 1-N;Histone H2B type 1-H;Histone H2B type 2-F;Histone H2B type 1-C/E/F/G/I;Histone H2B type 1-D;Histone H2B type F-S;Histone H2B type 1-K;Histone H2B type 1-A	HIST1H2BL;HIST1H2BM;HIST1H2BN;HIST1H2BH;HIST2H2BF;HIST1H2BC;HIST1H2BD;H2BFS;HIST1H2BK;HIST1H2BA	sp|Q99880|H2B1L_HUMAN Histone H2B type 1-L OS=Homo sapiens OX=9606 GN=H2BC13 PE=1 SV=3;sp|Q99879|H2B1M_HUMAN Histone H2B type 1-M OS=Homo sapiens OX=9606 GN=H2BC14 PE=1 SV=3;sp|Q99877|H2B1N_HUMAN Histone H2B type 1-N OS=Homo sapiens OX=9606 GN=H2BC15 PE=1	12	7	2	2	5	5	3	5	4	5	4	6	3	4	4	4	4	6	5	7	4	5	4	5	4	4	5	4	6	5	4	6	6	5	5	7	5	2	4	5	4	5
O60826	O60826	4	4	4	Coiled-coil domain-containing protein 22	CCDC22	sp|O60826|CCD22_HUMAN Coiled-coil domain-containing protein 22 OS=Homo sapiens OX=9606 GN=CCDC22 PE=1 SV=1	1	4	4	4	2	0	0	1	2	1	0	0	2	1	1	1	3	1	1	0	2	1	0	1	2	1	1	0	1	1	1	0	1	0	1	1	2	0	2	1	1	1
O60828-5;O60828-4;O60828-2;O60828;O60828-10;O60828-9;O60828-8;O60828-7;O60828-6;O60828-3	O60828-5;O60828-4;O60828-2;O60828;O60828-10;O60828-9;O60828-8;O60828-7;O60828-6;O60828-3	2;2;2;2;1;1;1;1;1;1	2;2;2;2;1;1;1;1;1;1	2;2;2;2;1;1;1;1;1;1	Polyglutamine-binding protein 1	PQBP1	sp|O60828-5|PQBP1_HUMAN Isoform 5 of Polyglutamine-binding protein 1 OS=Homo sapiens OX=9606 GN=PQBP1;sp|O60828-4|PQBP1_HUMAN Isoform 4 of Polyglutamine-binding protein 1 OS=Homo sapiens OX=9606 GN=PQBP1;sp|O60828-2|PQBP1_HUMAN Isoform 2 of Polyglutamine-b	10	2	2	2	1	0	2	2	1	1	1	2	1	1	2	2	1	1	2	1	1	0	1	1	1	1	2	2	1	1	2	1	1	1	2	2	1	0	1	1	0	1
O60830;O60830-2	O60830;O60830-2	1;1	1;1	1;1	Mitochondrial import inner membrane translocase subunit Tim17-B	TIMM17B	sp|O60830|TI17B_HUMAN Mitochondrial import inner membrane translocase subunit Tim17-B OS=Homo sapiens OX=9606 GN=TIMM17B PE=1 SV=1;sp|O60830-2|TI17B_HUMAN Isoform 2 of Mitochondrial import inner membrane translocase subunit Tim17-B OS=Homo sapiens OX=9606	2	1	1	1	0	0	0	0	1	0	0	0	0	0	0	0	1	0	0	0	1	0	1	1	0	0	0	0	1	0	0	0	0	0	0	1	1	0	0	0	1	0
O60831	O60831	2	2	2	PRA1 family protein 2	PRAF2	sp|O60831|PRAF2_HUMAN PRA1 family protein 2 OS=Homo sapiens OX=9606 GN=PRAF2 PE=1 SV=1	1	2	2	2	1	1	1	1	2	1	1	1	2	2	1	1	2	2	1	2	2	1	2	1	2	2	1	1	2	1	1	2	1	2	2	2	2	1	2	1	1	1
O60832-2;O60832	O60832-2;O60832	4;4	4;4	4;4	H/ACA ribonucleoprotein complex subunit 4	DKC1	sp|O60832-2|DKC1_HUMAN Isoform 3 of H/ACA ribonucleoprotein complex subunit DKC1 OS=Homo sapiens OX=9606 GN=DKC1;sp|O60832|DKC1_HUMAN H/ACA ribonucleoprotein complex subunit DKC1 OS=Homo sapiens OX=9606 GN=DKC1 PE=1 SV=3	2	4	4	4	1	1	1	1	2	1	2	1	2	1	2	1	2	1	1	1	2	1	2	2	2	1	1	2	2	2	1	1	1	1	2	1	2	1	1	1	1	1
O60841	O60841	8	8	8	Eukaryotic translation initiation factor 5B	EIF5B	sp|O60841|IF2P_HUMAN Eukaryotic translation initiation factor 5B OS=Homo sapiens OX=9606 GN=EIF5B PE=1 SV=4	1	8	8	8	1	5	2	1	3	3	3	2	2	2	3	1	3	3	1	4	1	1	4	4	4	2	1	2	4	2	1	3	4	1	5	4	1	3	2	3	1	4
O60861-2;O60861-1;O60861-4;O60861	O60861-2;O60861-1;O60861-4;O60861	1;1;1;1	1;1;1;1	1;1;1;1	Growth arrest-specific protein 7	GAS7	sp|O60861-2|GAS7_HUMAN Isoform 2 of Growth arrest-specific protein 7 OS=Homo sapiens OX=9606 GN=GAS7;sp|O60861-1|GAS7_HUMAN Isoform 1 of Growth arrest-specific protein 7 OS=Homo sapiens OX=9606 GN=GAS7;sp|O60861-4|GAS7_HUMAN Isoform 4 of Growth arrest-spec	4	1	1	1	0	0	0	1	0	0	1	1	0	0	0	0	0	0	0	0	0	0	0	0	0	0	1	1	1	1	0	1	0	0	0	1	0	0	1	0	0	0
O60869-2;O60869-3;O60869	O60869-2;O60869-3;O60869	2;2;2	2;2;2	2;2;2	Endothelial differentiation-related factor 1	EDF1	sp|O60869-2|EDF1_HUMAN Isoform 2 of Endothelial differentiation-related factor 1 OS=Homo sapiens OX=9606 GN=EDF1;sp|O60869-3|EDF1_HUMAN Isoform 3 of Endothelial differentiation-related factor 1 OS=Homo sapiens OX=9606 GN=EDF1;sp|O60869|EDF1_HUMAN Endotheli	3	2	2	2	1	1	1	1	1	1	2	2	1	2	1	2	1	0	2	1	1	0	2	1	1	1	2	1	1	1	1	2	1	1	2	2	0	1	1	1	2	2
O60884	O60884	7	7	7	DnaJ homolog subfamily A member 2	DNAJA2	sp|O60884|DNJA2_HUMAN DnaJ homolog subfamily A member 2 OS=Homo sapiens OX=9606 GN=DNAJA2 PE=1 SV=1	1	7	7	7	6	5	5	6	5	6	5	4	4	6	6	5	4	6	6	5	4	5	5	5	6	4	5	6	7	5	5	6	5	3	6	6	5	5	6	6	4	5
O60885;O60885-2;O60885-3	O60885;O60885-2;O60885-3	2;1;1	2;1;1	2;1;1	Bromodomain-containing protein 4	BRD4	sp|O60885|BRD4_HUMAN Bromodomain-containing protein 4 OS=Homo sapiens OX=9606 GN=BRD4 PE=1 SV=2;sp|O60885-2|BRD4_HUMAN Isoform C of Bromodomain-containing protein 4 OS=Homo sapiens OX=9606 GN=BRD4;sp|O60885-3|BRD4_HUMAN Isoform B of Bromodomain-containing	3	2	2	2	0	0	0	0	0	0	1	0	0	0	0	0	0	0	0	0	0	0	0	0	0	1	0	0	0	0	0	0	0	0	0	0	0	0	1	0	0	0
O60907;O60907-2;Q9BQ87	O60907;O60907-2;Q9BQ87	4;4;2	2;2;1	2;2;1	F-box-like/WD repeat-containing protein TBL1X;F-box-like/WD repeat-containing protein TBL1Y	TBL1X;TBL1Y	sp|O60907|TBL1X_HUMAN F-box-like/WD repeat-containing protein TBL1X OS=Homo sapiens OX=9606 GN=TBL1X PE=1 SV=3;sp|O60907-2|TBL1X_HUMAN Isoform 2 of F-box-like/WD repeat-containing protein TBL1X OS=Homo sapiens OX=9606 GN=TBL1X;sp|Q9BQ87|TBL1Y_HUMAN F-box-l	3	4	2	2	1	2	1	1	1	1	1	1	1	1	1	0	1	2	1	1	1	2	1	1	1	2	1	1	2	2	1	1	2	2	1	1	0	1	1	1	1	1
O60927	O60927	1	1	1	Protein phosphatase 1 regulatory subunit 11	PPP1R11	sp|O60927|PP1RB_HUMAN E3 ubiquitin-protein ligase PPP1R11 OS=Homo sapiens OX=9606 GN=PPP1R11 PE=1 SV=1	1	1	1	1	0	0	0	0	0	0	0	0	0	0	0	0	0	0	0	0	0	0	0	0	0	0	0	0	0	0	0	0	0	0	0	0	0	0	0	0	0	0
O62680	O62680	1	1	1			sp|O62680|CD59_PIG CD59 glycoprotein OS=Sus scrofa OX=9823 GN=CD59 PE=1 SV=1	1	1	1	1	1	0	1	1	1	1	1	1	0	1	1	1	1	1	1	1	1	1	1	1	1	1	1	1	1	1	1	1	1	1	1	1	1	1	1	1	1	0
O62787	O62787	4	4	4			sp|O62787|GTR3_PIG Solute carrier family 2, facilitated glucose transporter member 3 OS=Sus scrofa OX=9823 GN=SLC2A3 PE=2 SV=2	1	4	4	4	2	2	2	2	2	2	2	2	2	2	2	2	2	2	2	2	2	2	2	2	2	2	2	2	2	2	2	2	2	2	2	2	2	2	2	3	2	2
O62839	O62839	9	9	8			sp|O62839|CATA_PIG Catalase OS=Sus scrofa OX=9823 GN=CAT PE=1 SV=4	1	9	9	8	1	2	2	3	1	2	2	3	4	3	1	2	2	2	3	3	2	2	3	3	1	2	3	3	2	2	4	3	4	3	3	4	2	4	4	3	2	3
O73556	O73556	1	1	1			sp|O73556|POLG_HPE2W Genome polyprotein OS=Human parechovirus 2 (strain Williamson) OX=122962 PE=3 SV=1	1	1	1	1	1	1	1	1	1	0	0	1	1	0	1	1	1	1	1	1	1	0	1	1	1	0	1	1	1	0	1	1	1	0	1	1	1	1	1	1	1	1
O75027-2;O75027;O75027-3	O75027-2;O75027;O75027-3	2;2;1	2;2;1	2;2;1	ATP-binding cassette sub-family B member 7, mitochondrial	ABCB7	sp|O75027-2|ABCB7_HUMAN Isoform 2 of ATP-binding cassette sub-family B member 7, mitochondrial OS=Homo sapiens OX=9606 GN=ABCB7;sp|O75027|ABCB7_HUMAN ATP-binding cassette sub-family B member 7, mitochondrial OS=Homo sapiens OX=9606 GN=ABCB7 PE=1 SV=2;sp|O7	3	2	2	2	1	1	1	1	1	2	1	1	0	1	1	1	1	1	1	1	1	1	1	1	1	1	1	0	1	1	1	1	0	1	1	1	1	1	1	1	1	0
O75038-2;O75038-4;O75038-3;O75038;O75038-5	O75038-2;O75038-4;O75038-3;O75038	3;3;3;3;1	3;3;3;3;1	2;2;2;2;0	1-phosphatidylinositol 4,5-bisphosphate phosphodiesterase eta-2	PLCH2	sp|O75038-2|PLCH2_HUMAN Isoform 2 of 1-phosphatidylinositol 4,5-bisphosphate phosphodiesterase eta-2 OS=Homo sapiens OX=9606 GN=PLCH2;sp|O75038-4|PLCH2_HUMAN Isoform 4 of 1-phosphatidylinositol 4,5-bisphosphate phosphodiesterase eta-2 OS=Homo sapiens OX=96	5	3	3	2	0	0	1	1	2	1	1	1	1	1	1	1	1	1	1	1	1	1	1	1	1	1	1	1	2	1	1	1	2	1	1	2	1	1	1	1	0	1
O75044;P0DJJ0;P0DMP2	O75044;P0DJJ0	7;4;3	7;4;3	7;4;3	SLIT-ROBO Rho GTPase-activating protein 2;SLIT-ROBO Rho GTPase-activating protein 2C	SRGAP2;SRGAP2C	sp|O75044|SRGP2_HUMAN SLIT-ROBO Rho GTPase-activating protein 2 OS=Homo sapiens OX=9606 GN=SRGAP2 PE=1 SV=3;sp|P0DJJ0|SRG2C_HUMAN SLIT-ROBO Rho GTPase-activating protein 2C OS=Homo sapiens OX=9606 GN=SRGAP2C PE=1 SV=1	3	7	7	7	2	0	1	1	0	0	0	1	2	0	0	0	0	0	0	1	1	0	0	0	1	0	1	1	1	0	0	0	1	1	1	1	0	0	1	0	2	1
O75061;O75061-4;O75061-2;O75061-3	O75061;O75061-4;O75061-2	11;10;10;5	11;10;10;5	11;10;10;5	Putative tyrosine-protein phosphatase auxilin	DNAJC6	sp|O75061|AUXI_HUMAN Putative tyrosine-protein phosphatase auxilin OS=Homo sapiens OX=9606 GN=DNAJC6 PE=1 SV=3;sp|O75061-4|AUXI_HUMAN Isoform 4 of Putative tyrosine-protein phosphatase auxilin OS=Homo sapiens OX=9606 GN=DNAJC6;sp|O75061-2|AUXI_HUMAN Isofor	4	11	11	11	5	3	4	5	3	4	4	5	3	2	1	2	3	4	3	4	4	4	5	5	3	4	5	6	4	4	5	6	3	4	6	6	5	4	4	7	5	4
O75069-3;O75069-5;O75069-2;O75069	O75069-3;O75069-5;O75069-2;O75069	3;3;3;3	3;3;3;3	3;3;3;3	Transmembrane and coiled-coil domains protein 2	TMCC2	sp|O75069-3|TMCC2_HUMAN Isoform 3 of Transmembrane and coiled-coil domains protein 2 OS=Homo sapiens OX=9606 GN=TMCC2;sp|O75069-5|TMCC2_HUMAN Isoform 5 of Transmembrane and coiled-coil domains protein 2 OS=Homo sapiens OX=9606 GN=TMCC2;sp|O75069-2|TMCC2_HU	4	3	3	3	0	0	0	0	0	1	0	0	0	0	1	0	1	1	1	2	1	0	0	0	0	1	1	1	0	0	1	0	0	0	1	0	0	0	0	0	1	2
O75083;O75083-3	O75083;O75083-3	10;7	10;7	10;7	WD repeat-containing protein 1	WDR1	sp|O75083|WDR1_HUMAN WD repeat-containing protein 1 OS=Homo sapiens OX=9606 GN=WDR1 PE=1 SV=4;sp|O75083-3|WDR1_HUMAN Isoform 2 of WD repeat-containing protein 1 OS=Homo sapiens OX=9606 GN=WDR1	2	10	10	10	7	8	6	8	5	7	8	6	6	5	8	5	7	6	7	7	9	7	7	7	8	8	9	7	7	5	8	8	7	7	8	7	6	6	7	6	6	6
O75110;O75110-2	O75110	5;2	5;2	5;2	Probable phospholipid-transporting ATPase IIA	ATP9A	sp|O75110|ATP9A_HUMAN Probable phospholipid-transporting ATPase IIA OS=Homo sapiens OX=9606 GN=ATP9A PE=1 SV=3	2	5	5	5	0	0	0	1	0	1	1	2	0	1	0	0	2	1	2	0	0	0	1	0	0	1	1	1	1	1	0	1	1	1	1	0	1	1	0	0	0	0
O75122-3	O75122-3	18	15	2	CLIP-associating protein 2	CLASP2	sp|O75122-3|CLAP2_HUMAN Isoform 3 of CLIP-associating protein 2 OS=Homo sapiens OX=9606 GN=CLASP2	1	18	15	2	6	9	7	5	7	9	8	6	7	7	6	4	8	11	7	7	5	9	5	7	6	8	8	7	9	8	7	9	8	9	8	11	10	7	9	6	10	6
O75129-2;O75129-3;O75129	O75129-2;O75129-3;O75129	1;1;1	1;1;1	1;1;1	Astrotactin-2	ASTN2	sp|O75129-2|ASTN2_HUMAN Isoform 2 of Astrotactin-2 OS=Homo sapiens OX=9606 GN=ASTN2;sp|O75129-3|ASTN2_HUMAN Isoform 3 of Astrotactin-2 OS=Homo sapiens OX=9606 GN=ASTN2;sp|O75129|ASTN2_HUMAN Astrotactin-2 OS=Homo sapiens OX=9606 GN=ASTN2 PE=1 SV=2	3	1	1	1	0	1	0	0	0	1	0	0	0	0	1	0	0	1	0	0	0	0	0	0	0	0	1	0	0	0	1	0	0	0	0	0	0	0	0	0	0	0
O75131;Q86YQ8-2;Q9HCH3-2;Q8IYJ1;Q9UBL6-2;Q86YQ8;Q9HCH3;Q9UBL6	O75131	3;1;1;1;1;1;1;1	2;0;0;0;0;0;0;0	2;0;0;0;0;0;0;0	Copine-3	CPNE3	sp|O75131|CPNE3_HUMAN Copine-3 OS=Homo sapiens OX=9606 GN=CPNE3 PE=1 SV=1	8	3	2	2	3	2	2	2	2	2	1	2	2	2	2	3	3	2	1	2	3	2	1	2	2	1	2	2	2	1	2	1	2	2	2	2	3	1	2	3	2	2
O75145;O75145-2	O75145;O75145-2	10;9	10;9	8;7	Liprin-alpha-3	PPFIA3	sp|O75145|LIPA3_HUMAN Liprin-alpha-3 OS=Homo sapiens OX=9606 GN=PPFIA3 PE=1 SV=3;sp|O75145-2|LIPA3_HUMAN Isoform 2 of Liprin-alpha-3 OS=Homo sapiens OX=9606 GN=PPFIA3	2	10	10	8	2	1	1	1	3	2	1	0	1	1	0	1	1	2	1	3	1	1	1	1	1	1	1	2	1	0	1	2	2	1	1	1	2	2	1	1	1	0
O75146-2;O75146	O75146-2;O75146	2;2	2;2	2;2	Huntingtin-interacting protein 1-related protein	HIP1R	sp|O75146-2|HIP1R_HUMAN Isoform 2 of Huntingtin-interacting protein 1-related protein OS=Homo sapiens OX=9606 GN=HIP1R;sp|O75146|HIP1R_HUMAN Huntingtin-interacting protein 1-related protein OS=Homo sapiens OX=9606 GN=HIP1R PE=1 SV=2	2	2	2	2	0	0	0	0	0	0	0	0	0	0	0	0	0	1	0	0	0	0	0	0	0	0	0	1	0	0	0	0	0	0	0	0	1	0	0	1	0	0
O75150;O75150-3;O75150-4	O75150;O75150-3;O75150-4	4;3;3	4;3;3	3;2;2	E3 ubiquitin-protein ligase BRE1B	RNF40	sp|O75150|BRE1B_HUMAN E3 ubiquitin-protein ligase BRE1B OS=Homo sapiens OX=9606 GN=RNF40 PE=1 SV=5;sp|O75150-3|BRE1B_HUMAN Isoform 3 of E3 ubiquitin-protein ligase BRE1B OS=Homo sapiens OX=9606 GN=RNF40;sp|O75150-4|BRE1B_HUMAN Isoform 4 of E3 ubiquitin-pro	3	4	4	3	1	2	1	1	1	2	1	2	1	1	2	0	2	2	1	2	1	2	1	0	2	1	1	2	1	2	1	1	2	1	3	1	1	1	1	1	1	2
O75153	O75153	2	2	2	Clustered mitochondria protein homolog	CLUH	sp|O75153|CLU_HUMAN Clustered mitochondria protein homolog OS=Homo sapiens OX=9606 GN=CLUH PE=1 SV=2	1	2	2	2	0	0	0	0	1	0	0	0	0	0	0	0	0	1	0	0	0	2	0	0	0	1	1	0	1	0	1	0	1	0	0	1	0	1	0	0	0	1
O75155;O75155-2	O75155;O75155-2	6;5	6;5	6;5	Cullin-associated NEDD8-dissociated protein 2	CAND2	sp|O75155|CAND2_HUMAN Cullin-associated NEDD8-dissociated protein 2 OS=Homo sapiens OX=9606 GN=CAND2 PE=1 SV=3;sp|O75155-2|CAND2_HUMAN Isoform 2 of Cullin-associated NEDD8-dissociated protein 2 OS=Homo sapiens OX=9606 GN=CAND2	2	6	6	6	0	1	1	2	2	2	0	3	1	0	1	1	2	2	0	3	0	1	1	2	2	1	1	4	1	1	2	1	1	0	2	6	1	1	1	1	2	3
O75165	O75165	12	12	12	DnaJ homolog subfamily C member 13	DNAJC13	sp|O75165|DJC13_HUMAN DnaJ homolog subfamily C member 13 OS=Homo sapiens OX=9606 GN=DNAJC13 PE=1 SV=5	1	12	12	12	3	0	1	0	1	0	0	0	0	1	1	1	1	0	1	1	2	1	0	3	0	0	1	0	2	1	1	4	0	0	0	3	2	1	1	1	4	0
O75170-6;O75170-2;O75170-4;O75170-3;O75170-5;O75170	O75170-6;O75170-2;O75170-4;O75170-3;O75170-5;O75170	3;3;3;3;3;3	3;3;3;3;3;3	3;3;3;3;3;3	Serine/threonine-protein phosphatase 6 regulatory subunit 2	PPP6R2	sp|O75170-6|PP6R2_HUMAN Isoform 6 of Serine/threonine-protein phosphatase 6 regulatory subunit 2 OS=Homo sapiens OX=9606 GN=PPP6R2;sp|O75170-2|PP6R2_HUMAN Isoform 2 of Serine/threonine-protein phosphatase 6 regulatory subunit 2 OS=Homo sapiens OX=9606 GN=P	6	3	3	3	0	0	0	0	1	0	0	0	0	0	0	0	1	1	0	0	0	0	0	0	1	0	0	0	1	0	0	0	0	0	0	0	0	0	0	0	0	0
O75175	O75175	3	3	3	CCR4-NOT transcription complex subunit 3	CNOT3	sp|O75175|CNOT3_HUMAN CCR4-NOT transcription complex subunit 3 OS=Homo sapiens OX=9606 GN=CNOT3 PE=1 SV=1	1	3	3	3	1	1	2	1	1	1	1	0	1	1	0	0	1	0	1	0	1	1	1	0	0	1	2	2	1	1	0	2	0	1	1	0	0	1	1	1	2	1
O75179-7;O75179-2;O75179;O75179-6;O75179-3;O75179-4;O75179-5	O75179-7;O75179-2;O75179;O75179-6;O75179-3;O75179-4	7;7;7;6;4;4;2	7;7;7;6;4;4;2	4;4;4;3;3;3;1	Ankyrin repeat domain-containing protein 17	ANKRD17	sp|O75179-7|ANR17_HUMAN Isoform 7 of Ankyrin repeat domain-containing protein 17 OS=Homo sapiens OX=9606 GN=ANKRD17;sp|O75179-2|ANR17_HUMAN Isoform 2 of Ankyrin repeat domain-containing protein 17 OS=Homo sapiens OX=9606 GN=ANKRD17;sp|O75179|ANR17_HUMAN An	7	7	7	4	1	0	1	1	1	0	0	0	0	1	1	0	1	0	1	1	1	1	1	1	0	1	1	0	1	0	1	0	1	0	2	1	0	1	0	0	1	1
O75182-2;O75182	O75182-2;O75182	1;1	1;1	1;1	Paired amphipathic helix protein Sin3b	SIN3B	sp|O75182-2|SIN3B_HUMAN Isoform 2 of Paired amphipathic helix protein Sin3b OS=Homo sapiens OX=9606 GN=SIN3B;sp|O75182|SIN3B_HUMAN Paired amphipathic helix protein Sin3b OS=Homo sapiens OX=9606 GN=SIN3B PE=1 SV=2	2	1	1	1	0	0	0	0	0	0	0	0	0	0	0	0	0	0	0	0	0	0	1	0	0	0	0	1	0	0	0	0	0	0	0	1	0	0	0	0	0	0
O75190-2;O75190-3;O75190	O75190-2;O75190-3;O75190	2;2;2	2;2;2	1;1;1	DnaJ homolog subfamily B member 6	DNAJB6	sp|O75190-2|DNJB6_HUMAN Isoform B of DnaJ homolog subfamily B member 6 OS=Homo sapiens OX=9606 GN=DNAJB6;sp|O75190-3|DNJB6_HUMAN Isoform C of DnaJ homolog subfamily B member 6 OS=Homo sapiens OX=9606 GN=DNAJB6;sp|O75190|DNJB6_HUMAN DnaJ homolog subfamily B	3	2	2	1	0	0	0	0	1	0	0	0	1	0	0	0	1	1	0	0	1	1	0	0	1	0	0	0	1	0	0	1	1	0	0	1	0	1	0	0	0	1
O75208	O75208	2	2	2	Ubiquinone biosynthesis protein COQ9, mitochondrial	COQ9	sp|O75208|COQ9_HUMAN Ubiquinone biosynthesis protein COQ9, mitochondrial OS=Homo sapiens OX=9606 GN=COQ9 PE=1 SV=1	1	2	2	2	0	0	0	0	0	0	0	1	0	1	0	1	1	1	0	1	0	0	1	1	0	0	0	1	0	2	1	0	1	1	1	0	0	1	1	0	1	0
O75223;O75223-3	O75223;O75223-3	2;1	2;1	2;1	Gamma-glutamylcyclotransferase	GGCT	sp|O75223|GGCT_HUMAN Gamma-glutamylcyclotransferase OS=Homo sapiens OX=9606 GN=GGCT PE=1 SV=1;sp|O75223-3|GGCT_HUMAN Isoform 3 of Gamma-glutamylcyclotransferase OS=Homo sapiens OX=9606 GN=GGCT	2	2	2	2	0	1	0	1	1	0	0	0	0	1	0	0	1	0	0	0	0	0	0	1	0	0	1	1	0	0	1	1	0	0	0	0	0	0	0	0	0	0
O75251-2;O75251	O75251-2;O75251	3;3	3;3	3;3	NADH dehydrogenase [ubiquinone] iron-sulfur protein 7, mitochondrial	NDUFS7	sp|O75251-2|NDUS7_HUMAN Isoform 2 of NADH dehydrogenase [ubiquinone] iron-sulfur protein 7, mitochondrial OS=Homo sapiens OX=9606 GN=NDUFS7;sp|O75251|NDUS7_HUMAN NADH dehydrogenase [ubiquinone] iron-sulfur protein 7, mitochondrial OS=Homo sapiens OX=9606 G	2	3	3	3	1	1	2	1	2	2	1	1	1	2	2	1	2	1	1	1	1	2	2	2	0	2	1	1	2	2	1	1	2	2	2	2	1	1	2	1	2	2
O75306-2;O75306	O75306-2;O75306	9;9	9;9	9;9	NADH dehydrogenase [ubiquinone] iron-sulfur protein 2, mitochondrial	NDUFS2	sp|O75306-2|NDUS2_HUMAN Isoform 2 of NADH dehydrogenase [ubiquinone] iron-sulfur protein 2, mitochondrial OS=Homo sapiens OX=9606 GN=NDUFS2;sp|O75306|NDUS2_HUMAN NADH dehydrogenase [ubiquinone] iron-sulfur protein 2, mitochondrial OS=Homo sapiens OX=9606 G	2	9	9	9	3	2	4	4	3	2	3	3	3	1	3	2	3	5	3	3	3	4	3	4	5	2	3	4	6	5	6	3	5	3	5	4	2	3	3	2	3	2
P23416-3;O75311-2;P23416-2;P23416;O75311	P23416-3;O75311-2;P23416-2;P23416;O75311	1;1;1;1;1	1;1;1;1;1	1;1;1;1;1	Glycine receptor subunit alpha-2;Glycine receptor subunit alpha-3	GLRA2;GLRA3	sp|P23416-3|GLRA2_HUMAN Isoform 3 of Glycine receptor subunit alpha-2 OS=Homo sapiens OX=9606 GN=GLRA2;sp|O75311-2|GLRA3_HUMAN Isoform Alpha-3K of Glycine receptor subunit alpha-3 OS=Homo sapiens OX=9606 GN=GLRA3;sp|P23416-2|GLRA2_HUMAN Isoform Alpha-2B of	5	1	1	1	1	0	1	0	1	1	0	1	0	0	0	0	1	1	0	0	1	0	1	0	1	0	1	0	1	0	0	0	0	1	0	0	1	0	0	0	1	0
O75312	O75312	2	2	2	Zinc finger protein ZPR1	ZPR1	sp|O75312|ZPR1_HUMAN Zinc finger protein ZPR1 OS=Homo sapiens OX=9606 GN=ZPR1 PE=1 SV=1	1	2	2	2	0	0	0	0	0	0	0	0	0	0	0	0	0	0	0	0	0	0	0	0	0	0	0	0	0	1	0	0	0	0	0	0	0	0	0	1	0	0
O75323	O75323	2	2	2	Protein NipSnap homolog 2	GBAS	sp|O75323|NIPS2_HUMAN Protein NipSnap homolog 2 OS=Homo sapiens OX=9606 GN=NIPSNAP2 PE=1 SV=1	1	2	2	2	2	2	1	2	2	2	2	2	2	2	1	2	2	2	2	2	1	2	2	2	2	2	2	2	2	2	2	2	2	2	2	2	2	1	2	2	1	2
O75334-2;O75334-3;O75334;O75334-6;O75334-5;O75334-4;O75334-7;O75334-8	O75334-2;O75334-3;O75334;O75334-6;O75334-5;O75334-4;O75334-7;O75334-8	8;8;8;7;7;7;5;4	7;7;7;6;6;6;5;4	3;3;3;2;2;2;1;1	Liprin-alpha-2	PPFIA2	sp|O75334-2|LIPA2_HUMAN Isoform 2 of Liprin-alpha-2 OS=Homo sapiens OX=9606 GN=PPFIA2;sp|O75334-3|LIPA2_HUMAN Isoform 3 of Liprin-alpha-2 OS=Homo sapiens OX=9606 GN=PPFIA2;sp|O75334|LIPA2_HUMAN Liprin-alpha-2 OS=Homo sapiens OX=9606 GN=PPFIA2 PE=1 SV=2;sp|	8	8	7	3	2	2	1	1	3	2	1	0	2	2	0	2	1	3	3	2	3	2	1	1	3	2	1	3	3	1	2	3	2	0	3	2	3	1	2	1	2	3
O75340-2;O75340	O75340-2;O75340	3;3	3;3	3;3	Programmed cell death protein 6	PDCD6	sp|O75340-2|PDCD6_HUMAN Isoform 2 of Programmed cell death protein 6 OS=Homo sapiens OX=9606 GN=PDCD6;sp|O75340|PDCD6_HUMAN Programmed cell death protein 6 OS=Homo sapiens OX=9606 GN=PDCD6 PE=1 SV=1	2	3	3	3	2	3	2	3	2	2	2	1	3	2	1	2	2	2	2	1	1	3	1	2	1	3	2	2	1	1	2	1	1	3	1	3	3	3	0	2	2	2
O75348	O75348	4	2	2	V-type proton ATPase subunit G 1	ATP6V1G1	sp|O75348|VATG1_HUMAN V-type proton ATPase subunit G 1 OS=Homo sapiens OX=9606 GN=ATP6V1G1 PE=1 SV=3	1	4	2	2	1	1	2	2	2	1	2	2	1	2	2	2	2	1	2	2	2	2	2	3	1	1	1	2	1	2	2	3	2	3	3	3	3	1	2	2	3	2
O75351;Q6PIW4-2;Q6PIW4	O75351	3;1;1	2;0;0	2;0;0	Vacuolar protein sorting-associated protein 4B	VPS4B	sp|O75351|VPS4B_HUMAN Vacuolar protein sorting-associated protein 4B OS=Homo sapiens OX=9606 GN=VPS4B PE=1 SV=2	3	3	2	2	1	1	1	2	2	2	0	2	2	2	2	2	3	1	1	2	2	1	1	2	2	0	2	2	1	1	2	2	2	2	2	3	1	2	1	1	1	2
O75365;O75365-2;O75365-3	O75365;O75365-2;O75365-3	2;2;1	2;2;1	2;2;1	Protein tyrosine phosphatase type IVA 3	PTP4A3	sp|O75365|TP4A3_HUMAN Protein tyrosine phosphatase type IVA 3 OS=Homo sapiens OX=9606 GN=PTP4A3 PE=1 SV=2;sp|O75365-2|TP4A3_HUMAN Isoform 2 of Protein tyrosine phosphatase type IVA 3 OS=Homo sapiens OX=9606 GN=PTP4A3;sp|O75365-3|TP4A3_HUMAN Isoform 3 of Pr	3	2	2	2	1	0	0	0	0	0	0	0	0	0	0	0	0	0	0	0	0	0	0	0	1	0	0	0	1	0	0	0	0	0	0	0	0	0	0	0	0	0
O75367;O75367-3;O75367-2	O75367;O75367-3;O75367-2	14;14;12	14;14;12	12;12;10	Core histone macro-H2A.1	H2AFY	sp|O75367|H2AY_HUMAN Core histone macro-H2A.1 OS=Homo sapiens OX=9606 GN=MACROH2A1 PE=1 SV=4;sp|O75367-3|H2AY_HUMAN Isoform 3 of Core histone macro-H2A.1 OS=Homo sapiens OX=9606 GN=MACROH2A1;sp|O75367-2|H2AY_HUMAN Isoform 1 of Core histone macro-H2A.1 OS=H	3	14	14	12	9	9	7	10	10	11	10	9	9	10	11	9	7	10	9	9	10	9	10	10	10	9	9	9	10	9	10	10	9	10	11	10	7	9	9	8	8	7
O75368	O75368	3	3	3	SH3 domain-binding glutamic acid-rich-like protein	SH3BGRL	sp|O75368|SH3L1_HUMAN SH3 domain-binding glutamic acid-rich-like protein OS=Homo sapiens OX=9606 GN=SH3BGRL PE=1 SV=1	1	3	3	3	0	0	0	1	0	1	1	1	0	1	1	1	0	1	1	0	0	1	1	1	0	1	1	1	0	1	2	1	1	1	1	1	0	1	0	1	0	0
O75369-2;O75369-9;O75369;O75369-6;O75369-3;O75369-8;O75369-7;O75369-5;O75369-4	O75369-2;O75369-9;O75369;O75369-6;O75369-3;O75369-8;O75369-7;O75369-5;O75369-4	26;26;26;25;25;25;24;20;20	22;22;22;21;21;21;22;17;17	22;22;22;21;21;21;22;17;17	Filamin-B	FLNB	sp|O75369-2|FLNB_HUMAN Isoform 2 of Filamin-B OS=Homo sapiens OX=9606 GN=FLNB;sp|O75369-9|FLNB_HUMAN Isoform 9 of Filamin-B OS=Homo sapiens OX=9606 GN=FLNB;sp|O75369|FLNB_HUMAN Filamin-B OS=Homo sapiens OX=9606 GN=FLNB PE=1 SV=2;sp|O75369-6|FLNB_HUMAN Isof	9	26	22	22	3	4	3	4	4	4	4	2	4	3	4	4	4	6	6	5	6	4	5	4	4	3	1	3	7	3	4	6	5	3	5	4	5	7	6	5	4	3
O75376;O75376-2;O75376-3	O75376;O75376-2	3;3;1	3;3;1	3;3;1	Nuclear receptor corepressor 1	NCOR1	sp|O75376|NCOR1_HUMAN Nuclear receptor corepressor 1 OS=Homo sapiens OX=9606 GN=NCOR1 PE=1 SV=2;sp|O75376-2|NCOR1_HUMAN Isoform 2 of Nuclear receptor corepressor 1 OS=Homo sapiens OX=9606 GN=NCOR1	3	3	3	3	1	0	3	1	0	0	2	2	1	1	0	0	0	0	1	2	0	1	1	2	0	0	1	2	0	0	1	1	1	1	2	3	0	1	1	1	0	0
O75380	O75380	2	2	2	NADH dehydrogenase [ubiquinone] iron-sulfur protein 6, mitochondrial	NDUFS6	sp|O75380|NDUS6_HUMAN NADH dehydrogenase [ubiquinone] iron-sulfur protein 6, mitochondrial OS=Homo sapiens OX=9606 GN=NDUFS6 PE=1 SV=1	1	2	2	2	0	0	0	0	0	0	0	1	0	0	0	0	0	0	0	1	0	0	0	0	0	0	0	0	0	1	0	1	0	0	0	0	0	0	0	1	0	0
O75381-2;O75381	O75381-2;O75381	1;1	1;1	1;1	Peroxisomal membrane protein PEX14	PEX14	sp|O75381-2|PEX14_HUMAN Isoform 2 of Peroxisomal membrane protein PEX14 OS=Homo sapiens OX=9606 GN=PEX14;sp|O75381|PEX14_HUMAN Peroxisomal membrane protein PEX14 OS=Homo sapiens OX=9606 GN=PEX14 PE=1 SV=1	2	1	1	1	0	0	0	1	1	1	0	0	0	1	0	0	1	1	1	0	0	1	0	0	0	0	1	0	0	0	1	0	0	0	1	1	0	0	0	0	0	0
O75390	O75390	9	1	1	Citrate synthase, mitochondrial	CS	sp|O75390|CISY_HUMAN Citrate synthase, mitochondrial OS=Homo sapiens OX=9606 GN=CS PE=1 SV=2	1	9	1	1	6	4	7	8	7	5	6	7	6	8	5	7	7	6	6	6	6	6	7	7	6	6	6	7	6	5	7	7	8	5	7	7	6	5	6	7	6	5
O75391	O75391	1	1	1	Sperm-associated antigen 7	SPAG7	sp|O75391|SPAG7_HUMAN Sperm-associated antigen 7 OS=Homo sapiens OX=9606 GN=SPAG7 PE=1 SV=2	1	1	1	1	1	1	0	0	0	0	0	0	0	0	0	0	1	1	1	1	1	1	0	0	1	1	1	0	1	0	0	1	1	1	1	1	1	0	0	0	1	1
O75396	O75396	5	5	5	Vesicle-trafficking protein SEC22b	SEC22B	sp|O75396|SC22B_HUMAN Vesicle-trafficking protein SEC22b OS=Homo sapiens OX=9606 GN=SEC22B PE=1 SV=4	1	5	5	5	3	4	4	4	4	4	4	4	4	4	4	4	3	4	4	4	3	3	4	4	3	4	4	4	3	3	3	4	4	4	4	4	3	4	4	4	3	5
O75400-2;O75400	O75400-2;O75400	3;3	3;3	1;1	Pre-mRNA-processing factor 40 homolog A	PRPF40A	sp|O75400-2|PR40A_HUMAN Isoform 2 of Pre-mRNA-processing factor 40 homolog A OS=Homo sapiens OX=9606 GN=PRPF40A;sp|O75400|PR40A_HUMAN Pre-mRNA-processing factor 40 homolog A OS=Homo sapiens OX=9606 GN=PRPF40A PE=1 SV=2	2	3	3	1	3	2	2	1	1	2	2	1	1	2	1	0	1	1	2	0	1	1	1	1	1	2	2	1	2	1	2	1	2	2	1	1	2	1	3	0	2	2
Q2L969;O75431;O75431-2	Q2L969;O75431;O75431-2	4;4;3	4;4;3	4;4;3	Metaxin-2	MTX2	sp|Q2L969|MTX2_PIG Metaxin-2 OS=Sus scrofa OX=9823 GN=MTX2 PE=2 SV=1;sp|O75431|MTX2_HUMAN Metaxin-2 OS=Homo sapiens OX=9606 GN=MTX2 PE=1 SV=1;sp|O75431-2|MTX2_HUMAN Isoform 2 of Metaxin-2 OS=Homo sapiens OX=9606 GN=MTX2	3	4	4	4	2	2	2	2	3	3	2	1	3	1	1	3	2	2	3	3	3	2	3	2	3	3	2	1	2	3	3	3	2	2	3	3	3	2	2	1	2	3
O75436;O75436-2	O75436;O75436-2	6;4	6;4	5;3	Vacuolar protein sorting-associated protein 26A	VPS26A	sp|O75436|VP26A_HUMAN Vacuolar protein sorting-associated protein 26A OS=Homo sapiens OX=9606 GN=VPS26A PE=1 SV=2;sp|O75436-2|VP26A_HUMAN Isoform 2 of Vacuolar protein sorting-associated protein 26A OS=Homo sapiens OX=9606 GN=VPS26A	2	6	6	5	2	3	3	3	2	2	1	1	4	2	2	2	2	3	2	1	1	2	3	1	2	3	3	2	3	4	3	2	3	3	3	2	3	4	3	4	3	4
O75439	O75439	4	4	4	Mitochondrial-processing peptidase subunit beta	PMPCB	sp|O75439|MPPB_HUMAN Mitochondrial-processing peptidase subunit beta OS=Homo sapiens OX=9606 GN=PMPCB PE=1 SV=2	1	4	4	4	2	0	1	0	2	0	2	1	1	0	0	2	1	0	0	0	2	1	0	1	1	1	2	1	2	2	1	2	2	1	1	2	3	2	1	0	1	2
O75448-2;O75448	O75448-2;O75448	1;1	1;1	1;1	Mediator of RNA polymerase II transcription subunit 24	MED24	sp|O75448-2|MED24_HUMAN Isoform 2 of Mediator of RNA polymerase II transcription subunit 24 OS=Homo sapiens OX=9606 GN=MED24;sp|O75448|MED24_HUMAN Mediator of RNA polymerase II transcription subunit 24 OS=Homo sapiens OX=9606 GN=MED24 PE=1 SV=1	2	1	1	1	0	0	0	0	0	0	0	0	0	0	0	0	0	0	1	0	0	0	0	0	0	0	0	0	0	1	0	0	0	0	0	0	0	0	0	0	1	0
O75475;O75475-3;O75475-2	O75475;O75475-3;O75475-2	9;6;6	9;6;6	8;5;5	PC4 and SFRS1-interacting protein	PSIP1	sp|O75475|PSIP1_HUMAN PC4 and SFRS1-interacting protein OS=Homo sapiens OX=9606 GN=PSIP1 PE=1 SV=1;sp|O75475-3|PSIP1_HUMAN Isoform 3 of PC4 and SFRS1-interacting protein OS=Homo sapiens OX=9606 GN=PSIP1;sp|O75475-2|PSIP1_HUMAN Isoform 2 of PC4 and SFRS1-in	3	9	9	8	5	4	4	4	4	3	4	5	4	2	3	4	5	4	4	5	4	4	3	4	5	4	4	2	5	4	3	4	5	5	2	4	3	4	3	2	4	5
O75489	O75489	6	6	6	NADH dehydrogenase [ubiquinone] iron-sulfur protein 3, mitochondrial	NDUFS3	sp|O75489|NDUS3_HUMAN NADH dehydrogenase [ubiquinone] iron-sulfur protein 3, mitochondrial OS=Homo sapiens OX=9606 GN=NDUFS3 PE=1 SV=1	1	6	6	6	4	4	4	4	4	4	4	5	3	5	5	3	6	4	3	4	4	4	4	5	4	4	3	5	3	3	4	4	5	4	4	5	5	2	4	4	5	4
O75494-5;O75494-4;O75494-6;O75494-3;O75494-2;O75494;Q8WXF0	O75494-5;O75494-4;O75494-6;O75494-3;O75494-2;O75494	3;3;3;3;3;3;1	3;3;3;3;3;3;1	3;3;3;3;3;3;1	Serine/arginine-rich splicing factor 10	SRSF10	sp|O75494-5|SRS10_HUMAN Isoform 5 of Serine/arginine-rich splicing factor 10 OS=Homo sapiens OX=9606 GN=SRSF10;sp|O75494-4|SRS10_HUMAN Isoform 4 of Serine/arginine-rich splicing factor 10 OS=Homo sapiens OX=9606 GN=SRSF10;sp|O75494-6|SRS10_HUMAN Isoform 6	7	3	3	3	1	1	1	0	1	0	0	0	0	1	0	1	1	0	1	0	0	0	0	0	0	1	0	1	1	0	0	1	1	0	1	2	1	0	1	0	2	0
O75506	O75506	1	1	1	Heat shock factor-binding protein 1	HSBP1	sp|O75506|HSBP1_HUMAN Heat shock factor-binding protein 1 OS=Homo sapiens OX=9606 GN=HSBP1 PE=1 SV=1	1	1	1	1	0	0	0	0	0	0	0	0	0	0	0	0	0	0	0	0	1	0	0	0	0	0	0	0	1	0	0	0	0	0	0	0	0	0	0	0	0	1
O75533;O75533-2	O75533	26;4	26;4	26;4	Splicing factor 3B subunit 1	SF3B1	sp|O75533|SF3B1_HUMAN Splicing factor 3B subunit 1 OS=Homo sapiens OX=9606 GN=SF3B1 PE=1 SV=3	2	26	26	26	11	13	10	14	11	8	15	11	9	10	11	12	12	11	12	15	11	10	14	13	10	11	13	15	16	10	12	15	17	11	17	15	11	14	12	14	14	12
O75534-2;O75534;O75534-3;O75534-4	O75534-2;O75534;O75534-3;O75534-4	6;6;6;6	6;6;6;6	6;6;6;6	Cold shock domain-containing protein E1	CSDE1	sp|O75534-2|CSDE1_HUMAN Isoform 2 of Cold shock domain-containing protein E1 OS=Homo sapiens OX=9606 GN=CSDE1;sp|O75534|CSDE1_HUMAN Cold shock domain-containing protein E1 OS=Homo sapiens OX=9606 GN=CSDE1 PE=1 SV=2;sp|O75534-3|CSDE1_HUMAN Isoform 3 of Cold	4	6	6	6	2	4	4	4	4	4	4	3	5	4	3	2	3	5	4	4	3	3	4	4	5	4	5	3	3	4	5	4	4	4	4	5	3	3	4	4	3	4
O75553-3;O75553-4;O75553-5;O75553-6;O75553	O75553-3;O75553-4;O75553-5;O75553-6;O75553	1;1;1;1;1	1;1;1;1;1	1;1;1;1;1	Disabled homolog 1	DAB1	sp|O75553-3|DAB1_HUMAN Isoform DAB469 of Disabled homolog 1 OS=Homo sapiens OX=9606 GN=DAB1;sp|O75553-4|DAB1_HUMAN Isoform DAB537 of Disabled homolog 1 OS=Homo sapiens OX=9606 GN=DAB1;sp|O75553-5|DAB1_HUMAN Isoform DAB553 of Disabled homolog 1 OS=Homo sapi	5	1	1	1	0	0	0	0	0	0	0	0	0	0	0	0	0	0	0	0	0	0	0	0	0	0	0	0	0	0	0	0	0	0	0	0	0	0	0	0	0	0
O75569-3;O75569-2;O75569	O75569-3;O75569-2;O75569	7;7;7	7;7;7	7;7;7	Interferon-inducible double-stranded RNA-dependent protein kinase activator A	PRKRA	sp|O75569-3|PRKRA_HUMAN Isoform 3 of Interferon-inducible double-stranded RNA-dependent protein kinase activator A OS=Homo sapiens OX=9606 GN=PRKRA;sp|O75569-2|PRKRA_HUMAN Isoform 2 of Interferon-inducible double-stranded RNA-dependent protein kinase activ	3	7	7	7	4	3	2	2	4	2	2	4	3	4	4	4	4	3	6	5	4	2	6	3	3	3	5	4	4	3	4	5	4	4	5	6	3	3	2	5	3	3
O75582;O75582-3;O75582-2	O75582;O75582-3	6;5;2	6;5;2	6;5;2	Ribosomal protein S6 kinase alpha-5	RPS6KA5	sp|O75582|KS6A5_HUMAN Ribosomal protein S6 kinase alpha-5 OS=Homo sapiens OX=9606 GN=RPS6KA5 PE=1 SV=1;sp|O75582-3|KS6A5_HUMAN Isoform 3 of Ribosomal protein S6 kinase alpha-5 OS=Homo sapiens OX=9606 GN=RPS6KA5	3	6	6	6	0	2	0	2	0	3	1	3	0	1	2	2	0	3	2	3	1	3	3	2	2	2	4	2	3	2	3	3	0	0	3	3	1	1	1	4	2	1
O75608-2;O75608	O75608-2;O75608	2;2	2;2	2;2	Acyl-protein thioesterase 1	LYPLA1	sp|O75608-2|LYPA1_HUMAN Isoform 2 of Acyl-protein thioesterase 1 OS=Homo sapiens OX=9606 GN=LYPLA1;sp|O75608|LYPA1_HUMAN Acyl-protein thioesterase 1 OS=Homo sapiens OX=9606 GN=LYPLA1 PE=1 SV=1	2	2	2	2	1	1	1	1	1	1	1	0	1	1	1	2	1	1	1	1	1	1	1	2	1	1	1	1	1	1	1	1	1	1	2	2	1	1	0	1	1	1
O75643;O75643-2	O75643	39;9	39;9	39;9	U5 small nuclear ribonucleoprotein 200 kDa helicase	SNRNP200	sp|O75643|U520_HUMAN U5 small nuclear ribonucleoprotein 200 kDa helicase OS=Homo sapiens OX=9606 GN=SNRNP200 PE=1 SV=2	2	39	39	39	15	16	16	13	15	13	12	12	15	16	15	17	18	13	16	15	16	15	12	13	13	13	16	14	20	14	15	17	16	14	15	17	13	16	14	11	12	12
O75663-2;O75663	O75663-2;O75663	2;2	2;2	2;2	TIP41-like protein	TIPRL	sp|O75663-2|TIPRL_HUMAN Isoform 2 of TIP41-like protein OS=Homo sapiens OX=9606 GN=TIPRL;sp|O75663|TIPRL_HUMAN TIP41-like protein OS=Homo sapiens OX=9606 GN=TIPRL PE=1 SV=2	2	2	2	2	1	0	0	0	0	0	0	0	0	0	0	0	0	0	0	0	0	0	0	0	1	1	0	0	1	0	0	0	1	1	0	0	1	0	0	0	1	0
O75688-4;O75688-2;O75688;O75688-5;O75688-3	O75688-4;O75688-2;O75688;O75688-5	6;6;6;5;1	4;4;4;3;1	4;4;4;3;1	Protein phosphatase 1B	PPM1B	sp|O75688-4|PPM1B_HUMAN Isoform 4 of Protein phosphatase 1B OS=Homo sapiens OX=9606 GN=PPM1B;sp|O75688-2|PPM1B_HUMAN Isoform Beta-2 of Protein phosphatase 1B OS=Homo sapiens OX=9606 GN=PPM1B;sp|O75688|PPM1B_HUMAN Protein phosphatase 1B OS=Homo sapiens OX=9	5	6	4	4	3	2	2	2	2	4	3	2	3	3	2	2	4	3	2	3	3	2	2	2	2	2	3	2	4	2	2	2	3	3	2	2	2	2	2	3	2	1
O75694-2;O75694	O75694-2;O75694	11;11	11;11	11;11	Nuclear pore complex protein Nup155	NUP155	sp|O75694-2|NU155_HUMAN Isoform 2 of Nuclear pore complex protein Nup155 OS=Homo sapiens OX=9606 GN=NUP155;sp|O75694|NU155_HUMAN Nuclear pore complex protein Nup155 OS=Homo sapiens OX=9606 GN=NUP155 PE=1 SV=1	2	11	11	11	1	3	4	1	1	3	3	2	2	2	1	1	2	2	3	2	1	2	2	2	2	3	5	3	4	1	4	2	5	3	5	3	3	2	2	5	2	3
O75695	O75695	2	2	2	Protein XRP2	RP2	sp|O75695|XRP2_HUMAN Protein XRP2 OS=Homo sapiens OX=9606 GN=RP2 PE=1 SV=4	1	2	2	2	1	1	0	0	1	0	0	1	0	1	1	0	1	1	1	0	1	1	0	0	0	0	0	1	1	0	0	0	0	0	0	0	1	0	0	0	1	0
O75746;O75746-2	O75746;O75746-2	21;19	21;19	16;14	Calcium-binding mitochondrial carrier protein Aralar1	SLC25A12	sp|O75746|CMC1_HUMAN Calcium-binding mitochondrial carrier protein Aralar1 OS=Homo sapiens OX=9606 GN=SLC25A12 PE=1 SV=2;sp|O75746-2|CMC1_HUMAN Isoform 2 of Calcium-binding mitochondrial carrier protein Aralar1 OS=Homo sapiens OX=9606 GN=SLC25A12	2	21	21	16	10	10	9	13	10	10	13	11	12	9	12	9	8	10	10	9	8	10	11	11	10	10	11	11	10	8	15	12	11	10	10	12	10	10	11	9	10	9
O75787-2;O75787	O75787-2;O75787	2;2	2;2	2;2	Renin receptor	ATP6AP2	sp|O75787-2|RENR_HUMAN Isoform 2 of Renin receptor OS=Homo sapiens OX=9606 GN=ATP6AP2;sp|O75787|RENR_HUMAN Renin receptor OS=Homo sapiens OX=9606 GN=ATP6AP2 PE=1 SV=2	2	2	2	2	1	0	0	0	0	0	0	0	0	0	0	0	0	0	0	0	0	0	0	0	0	1	0	0	1	0	0	0	0	0	0	0	1	0	0	0	1	0
O75794	O75794	2	2	2	Cell division cycle protein 123 homolog	CDC123	sp|O75794|CD123_HUMAN Cell division cycle protein 123 homolog OS=Homo sapiens OX=9606 GN=CDC123 PE=1 SV=1	1	2	2	2	0	1	0	0	0	0	0	0	0	0	0	0	0	0	0	0	0	0	0	0	0	0	0	0	0	0	0	0	0	0	0	1	0	0	0	0	0	1
P54855;O75795	P54855;O75795	1;1	1;1	1;1	UDP-glucuronosyltransferase 2B15;UDP-glucuronosyltransferase 2B17	UGT2B15;UGT2B17	sp|P54855|UDB15_HUMAN UDP-glucuronosyltransferase 2B15 OS=Homo sapiens OX=9606 GN=UGT2B15 PE=1 SV=3;sp|O75795|UDB17_HUMAN UDP-glucuronosyltransferase 2B17 OS=Homo sapiens OX=9606 GN=UGT2B17 PE=1 SV=1	2	1	1	1	1	1	1	1	0	1	1	1	1	1	1	0	0	1	1	1	0	1	1	1	1	1	1	1	1	1	1	1	1	1	1	1	1	1	1	1	1	1
O75817	O75817	1	1	1	Ribonuclease P protein subunit p20	POP7	sp|O75817|POP7_HUMAN Ribonuclease P protein subunit p20 OS=Homo sapiens OX=9606 GN=POP7 PE=1 SV=2	1	1	1	1	0	1	0	0	0	0	0	0	0	0	0	0	0	0	1	0	0	0	0	0	1	0	0	0	1	0	0	0	0	0	0	0	0	0	0	0	0	0
O75821	O75821	4	4	4	Eukaryotic translation initiation factor 3 subunit G	EIF3G	sp|O75821|EIF3G_HUMAN Eukaryotic translation initiation factor 3 subunit G OS=Homo sapiens OX=9606 GN=EIF3G PE=1 SV=2	1	4	4	4	2	2	2	2	2	2	2	2	2	2	2	1	2	2	2	2	2	2	2	2	2	1	2	2	2	2	2	3	2	2	3	2	2	2	2	2	2	2
O75822-2;O75822-3;O75822	O75822-2;O75822-3;O75822	3;3;3	3;3;3	3;3;3	Eukaryotic translation initiation factor 3 subunit J	EIF3J	sp|O75822-2|EIF3J_HUMAN Isoform 2 of Eukaryotic translation initiation factor 3 subunit J OS=Homo sapiens OX=9606 GN=EIF3J;sp|O75822-3|EIF3J_HUMAN Isoform 3 of Eukaryotic translation initiation factor 3 subunit J OS=Homo sapiens OX=9606 GN=EIF3J;sp|O75822|	3	3	3	3	0	0	0	0	1	0	0	0	0	0	0	0	1	0	0	0	0	0	0	0	0	0	0	0	0	0	0	0	0	0	0	0	0	0	0	0	1	0
O75828	O75828	4	2	2	Carbonyl reductase [NADPH] 3	CBR3	sp|O75828|CBR3_HUMAN Carbonyl reductase [NADPH] 3 OS=Homo sapiens OX=9606 GN=CBR3 PE=1 SV=3	1	4	2	2	2	3	2	3	2	2	3	3	2	2	3	3	2	2	3	4	2	1	2	4	1	1	4	3	2	3	2	2	3	1	2	2	2	2	2	1	2	2
O75832	O75832	2	2	2	26S proteasome non-ATPase regulatory subunit 10	PSMD10	sp|O75832|PSD10_HUMAN 26S proteasome non-ATPase regulatory subunit 10 OS=Homo sapiens OX=9606 GN=PSMD10 PE=1 SV=1	1	2	2	2	2	1	2	1	2	1	1	1	2	1	1	1	0	1	2	0	2	1	1	1	2	2	0	2	1	1	2	2	1	0	2	1	1	1	1	1	0	1
O75844	O75844	3	3	3	CAAX prenyl protease 1 homolog	ZMPSTE24	sp|O75844|FACE1_HUMAN CAAX prenyl protease 1 homolog OS=Homo sapiens OX=9606 GN=ZMPSTE24 PE=1 SV=2	1	3	3	3	0	0	2	0	1	0	0	0	0	0	1	0	1	0	0	1	1	1	0	2	0	0	1	1	0	0	0	1	1	0	1	0	0	0	1	0	0	0
O75874	O75874	10	9	9	Isocitrate dehydrogenase [NADP] cytoplasmic	IDH1	sp|O75874|IDHC_HUMAN Isocitrate dehydrogenase [NADP] cytoplasmic OS=Homo sapiens OX=9606 GN=IDH1 PE=1 SV=2	1	10	9	9	8	5	8	6	6	8	7	7	6	9	7	6	7	10	6	8	7	7	7	7	5	7	6	7	10	7	8	7	5	7	8	8	7	7	7	7	7	6
O75886;O75886-2	O75886;O75886-2	4;3	3;2	3;2	Signal transducing adapter molecule 2	STAM2	sp|O75886|STAM2_HUMAN Signal transducing adapter molecule 2 OS=Homo sapiens OX=9606 GN=STAM2 PE=1 SV=1;sp|O75886-2|STAM2_HUMAN Isoform 2 of Signal transducing adapter molecule 2 OS=Homo sapiens OX=9606 GN=STAM2	2	4	3	3	0	0	0	1	0	0	0	0	0	0	0	1	0	0	0	1	0	0	0	0	0	0	1	0	1	0	0	0	1	0	0	1	0	0	0	0	0	0
O75907	O75907	2	2	2	Diacylglycerol O-acyltransferase 1	DGAT1	sp|O75907|DGAT1_HUMAN Diacylglycerol O-acyltransferase 1 OS=Homo sapiens OX=9606 GN=DGAT1 PE=1 SV=2	1	2	2	2	2	0	2	0	1	1	1	0	2	0	1	1	1	1	1	1	2	1	0	0	1	1	0	1	2	2	1	1	2	1	1	1	1	1	2	0	2	1
O75909-2;O75909-1;O75909;O75909-4	O75909-2;O75909-1;O75909;O75909-4	3;3;3;3	3;3;3;3	3;3;3;3	Cyclin-K	CCNK	sp|O75909-2|CCNK_HUMAN Isoform 2 of Cyclin-K OS=Homo sapiens OX=9606 GN=CCNK;sp|O75909-1|CCNK_HUMAN Isoform 3 of Cyclin-K OS=Homo sapiens OX=9606 GN=CCNK;sp|O75909|CCNK_HUMAN Cyclin-K OS=Homo sapiens OX=9606 GN=CCNK PE=1 SV=2;sp|O75909-4|CCNK_HUMAN Isoform	4	3	3	3	1	0	0	0	0	0	0	1	0	1	0	0	0	1	1	0	0	0	0	1	0	0	0	0	2	0	0	0	1	1	0	1	0	0	0	0	0	0
O75911	O75911	2	2	2	Short-chain dehydrogenase/reductase 3	DHRS3	sp|O75911|DHRS3_HUMAN Short-chain dehydrogenase/reductase 3 OS=Homo sapiens OX=9606 GN=DHRS3 PE=1 SV=2	1	2	2	2	0	0	0	1	0	1	0	0	0	1	0	1	2	1	0	1	1	0	0	0	2	0	0	0	2	1	1	1	1	1	0	1	0	1	1	1	0	1
O75912	O75912	1	1	1	Diacylglycerol kinase iota	DGKI	sp|O75912|DGKI_HUMAN Diacylglycerol kinase iota OS=Homo sapiens OX=9606 GN=DGKI PE=1 SV=1	1	1	1	1	0	1	0	0	1	0	0	0	1	0	0	0	1	0	0	1	1	0	0	0	1	0	0	0	0	0	0	0	1	0	0	0	0	0	0	0	0	1
O75914-2;O75914;O75914-4;O75914-3	O75914-2;O75914;O75914-4;O75914-3	9;9;9;9	9;9;9;9	5;5;5;5	Serine/threonine-protein kinase PAK 3	PAK3	sp|O75914-2|PAK3_HUMAN Isoform 2 of Serine/threonine-protein kinase PAK 3 OS=Homo sapiens OX=9606 GN=PAK3;sp|O75914|PAK3_HUMAN Serine/threonine-protein kinase PAK 3 OS=Homo sapiens OX=9606 GN=PAK3 PE=1 SV=2;sp|O75914-4|PAK3_HUMAN Isoform 4 of Serine/threon	4	9	9	5	3	3	2	2	2	2	1	3	3	3	4	4	3	2	3	2	3	3	3	4	4	2	3	3	4	3	2	2	4	3	4	3	1	1	3	2	2	4
O75916-4;O75916-2;O75916-3;O75916-5;O75916	O75916-4;O75916-2;O75916-3;O75916-5;O75916	1;1;1;1;1	1;1;1;1;1	1;1;1;1;1	Regulator of G-protein signaling 9	RGS9	sp|O75916-4|RGS9_HUMAN Isoform 4 of Regulator of G-protein signaling 9 OS=Homo sapiens OX=9606 GN=RGS9;sp|O75916-2|RGS9_HUMAN Isoform 2 of Regulator of G-protein signaling 9 OS=Homo sapiens OX=9606 GN=RGS9;sp|O75916-3|RGS9_HUMAN Isoform 3 of Regulator of G	5	1	1	1	1	1	0	1	1	0	1	0	1	1	0	0	1	1	0	0	1	1	0	0	1	1	0	1	1	1	1	1	1	1	1	1	1	1	1	0	1	1
O75923-15;O75923-3;O75923-9;O75923;O75923-14;O75923-6;O75923-12;O75923-5;O75923-11;O75923-4;O75923-10;O75923-2;O75923-8;O75923-7;O75923-13	O75923-15;O75923-3;O75923-9;O75923;O75923-14;O75923-6;O75923-12;O75923-5;O75923-11;O75923-4;O75923-10;O75923-2;O75923-8;O75923-7;O75923-13	4;4;4;4;4;4;4;4;4;4;4;4;4;4;4	4;4;4;4;4;4;4;4;4;4;4;4;4;4;4	4;4;4;4;4;4;4;4;4;4;4;4;4;4;4	Dysferlin	DYSF	sp|O75923-15|DYSF_HUMAN Isoform 15 of Dysferlin OS=Homo sapiens OX=9606 GN=DYSF;sp|O75923-3|DYSF_HUMAN Isoform 3 of Dysferlin OS=Homo sapiens OX=9606 GN=DYSF;sp|O75923-9|DYSF_HUMAN Isoform 9 of Dysferlin OS=Homo sapiens OX=9606 GN=DYSF;sp|O75923|DYSF_HUMAN	15	4	4	4	0	1	0	0	0	2	0	0	0	0	0	0	0	1	1	0	0	0	0	0	1	2	1	0	0	1	0	0	0	0	0	2	0	0	1	0	1	0
O75934	O75934	4	4	4	Pre-mRNA-splicing factor SPF27	BCAS2	sp|O75934|SPF27_HUMAN Pre-mRNA-splicing factor SPF27 OS=Homo sapiens OX=9606 GN=BCAS2 PE=1 SV=1	1	4	4	4	0	0	0	0	1	2	0	0	1	1	2	1	1	0	2	0	1	1	3	1	0	2	1	0	0	0	0	1	0	1	1	0	1	0	0	0	1	1
O75935-3;O75935	O75935-3;O75935	1;1	1;1	1;1	Dynactin subunit 3	DCTN3	sp|O75935-3|DCTN3_HUMAN Isoform 3 of Dynactin subunit 3 OS=Homo sapiens OX=9606 GN=DCTN3;sp|O75935|DCTN3_HUMAN Dynactin subunit 3 OS=Homo sapiens OX=9606 GN=DCTN3 PE=1 SV=1	2	1	1	1	1	1	0	1	0	0	0	0	1	0	1	0	0	0	0	0	0	0	0	0	1	0	1	1	1	0	0	0	0	0	0	0	0	1	0	0	1	1
O75940	O75940	4	4	4	Survival of motor neuron-related-splicing factor 30	SMNDC1	sp|O75940|SPF30_HUMAN Survival of motor neuron-related-splicing factor 30 OS=Homo sapiens OX=9606 GN=SMNDC1 PE=1 SV=1	1	4	4	4	2	3	2	4	2	1	0	3	1	3	2	4	2	1	3	3	1	1	1	3	1	0	2	2	4	2	4	4	2	2	4	4	0	1	3	3	1	0
O75962-5;O75962;O75962-2;O75962-4	O75962-5;O75962;O75962-2;O75962-4	9;9;8;8	9;9;8;8	9;9;8;8	Triple functional domain protein	TRIO	sp|O75962-5|TRIO_HUMAN Isoform 5 of Triple functional domain protein OS=Homo sapiens OX=9606 GN=TRIO;sp|O75962|TRIO_HUMAN Triple functional domain protein OS=Homo sapiens OX=9606 GN=TRIO PE=1 SV=2;sp|O75962-2|TRIO_HUMAN Isoform 2 of Triple functional domai	4	9	9	9	3	0	0	0	1	1	1	0	0	0	0	0	0	1	1	0	1	0	1	0	1	2	1	0	1	1	0	0	1	1	2	1	1	1	2	0	1	1
O75970-5;O75970-3;O75970-2;O75970	O75970-5;O75970-3;O75970-2;O75970	6;6;6;6	6;6;6;6	6;6;6;6	Multiple PDZ domain protein	MPDZ	sp|O75970-5|MPDZ_HUMAN Isoform 4 of Multiple PDZ domain protein OS=Homo sapiens OX=9606 GN=MPDZ;sp|O75970-3|MPDZ_HUMAN Isoform 3 of Multiple PDZ domain protein OS=Homo sapiens OX=9606 GN=MPDZ;sp|O75970-2|MPDZ_HUMAN Isoform 2 of Multiple PDZ domain protein	4	6	6	6	1	0	1	1	1	1	2	1	1	1	1	1	0	1	1	1	1	2	2	2	1	0	1	1	1	2	2	1	1	3	2	0	1	1	1	1	1	1
O76003	O76003	2	2	2	Glutaredoxin-3	GLRX3	sp|O76003|GLRX3_HUMAN Glutaredoxin-3 OS=Homo sapiens OX=9606 GN=GLRX3 PE=1 SV=2	1	2	2	2	1	0	1	0	0	1	1	0	0	0	0	0	0	0	1	0	0	0	0	0	0	1	1	0	0	0	1	0	0	1	1	1	0	0	1	0	0	0
O76031	O76031	3	3	3	ATP-dependent Clp protease ATP-binding subunit clpX-like, mitochondrial	CLPX	sp|O76031|CLPX_HUMAN ATP-dependent Clp protease ATP-binding subunit clpX-like, mitochondrial OS=Homo sapiens OX=9606 GN=CLPX PE=1 SV=2	1	3	3	3	0	0	0	0	0	0	0	0	0	0	0	0	0	0	0	0	0	0	0	0	1	0	0	0	1	0	0	0	0	0	0	0	0	1	0	0	0	0
O76041-2;O76041	O76041-2;O76041	4;2	3;2	3;2	Nebulette	NEBL	sp|O76041-2|NEBL_HUMAN Isoform 2 of Nebulette OS=Homo sapiens OX=9606 GN=NEBL;sp|O76041|NEBL_HUMAN Nebulette OS=Homo sapiens OX=9606 GN=NEBL PE=1 SV=1	2	4	3	3	0	0	0	1	0	1	0	0	1	0	1	0	1	0	1	0	0	1	1	2	0	0	0	0	0	0	0	0	0	0	1	0	0	0	1	0	1	0
O76070	O76070	1	1	1	Gamma-synuclein	SNCG	sp|O76070|SYUG_HUMAN Gamma-synuclein OS=Homo sapiens OX=9606 GN=SNCG PE=1 SV=2	1	1	1	1	1	1	1	1	1	1	1	1	1	1	1	1	1	1	1	1	1	1	1	1	1	1	1	1	1	1	1	1	1	1	1	1	1	1	1	1	1	1
O76071	O76071	1	1	1	Probable cytosolic iron-sulfur protein assembly protein CIAO1	CIAO1	sp|O76071|CIAO1_HUMAN Probable cytosolic iron-sulfur protein assembly protein CIAO1 OS=Homo sapiens OX=9606 GN=CIAO1 PE=1 SV=1	1	1	1	1	0	0	0	0	0	0	0	0	1	0	0	0	0	0	0	0	0	0	0	0	0	0	0	0	0	0	0	0	0	0	0	0	0	0	0	0	0	1
O76094;O76094-2	O76094;O76094-2	3;2	3;2	3;2	Signal recognition particle subunit SRP72	SRP72	sp|O76094|SRP72_HUMAN Signal recognition particle subunit SRP72 OS=Homo sapiens OX=9606 GN=SRP72 PE=1 SV=3;sp|O76094-2|SRP72_HUMAN Isoform 2 of Signal recognition particle subunit SRP72 OS=Homo sapiens OX=9606 GN=SRP72	2	3	3	3	3	2	2	2	3	1	2	0	2	2	1	2	2	1	2	1	2	1	1	2	2	3	1	1	3	2	2	2	2	1	2	2	2	2	3	1	3	3
O77564	O77564	6	6	3			sp|O77564|FOLH1_PIG Glutamate carboxypeptidase 2 OS=Sus scrofa OX=9823 GN=FOLH1 PE=1 SV=1	1	6	6	3	1	0	0	0	0	0	1	1	0	2	1	1	0	0	0	1	0	0	1	2	1	0	3	1	1	1	0	0	1	0	0	2	1	1	3	2	0	0
O77591;P29218-2;P29218;P29218-3	O77591	7;2;2;1	7;2;2;1	7;2;2;1			sp|O77591|IMPA1_PIG Inositol monophosphatase 1 OS=Sus scrofa OX=9823 GN=IMPA1 PE=2 SV=1	4	7	7	7	5	4	5	4	6	5	4	5	5	6	6	5	4	5	4	5	5	5	5	5	4	5	5	3	7	5	5	5	5	5	5	6	4	3	4	5	5	4
O77735;O15126-2;O15126	O77735;O15126-2;O15126	4;2;2	4;2;2	4;2;2	Secretory carrier-associated membrane protein 1	SCAMP1	sp|O77735|SCAM1_PIG Secretory carrier-associated membrane protein 1 OS=Sus scrofa OX=9823 GN=SCAMP1 PE=2 SV=1;sp|O15126-2|SCAM1_HUMAN Isoform 2 of Secretory carrier-associated membrane protein 1 OS=Homo sapiens OX=9606 GN=SCAMP1;sp|O15126|SCAM1_HUMAN Secre	3	4	4	4	2	2	2	2	3	2	2	3	2	2	2	2	3	2	2	2	2	2	2	2	2	2	2	3	2	2	2	2	2	2	2	2	2	3	2	2	2	2
O79874;P03886	O79874	5;1	5;1	5;1			sp|O79874|NU1M_PIG NADH-ubiquinone oxidoreductase chain 1 OS=Sus scrofa OX=9823 GN=MT-ND1 PE=1 SV=1	2	5	5	5	2	2	2	2	1	1	1	1	0	2	1	2	2	2	2	3	2	2	3	2	2	2	2	3	3	3	2	3	2	3	2	2	2	2	2	3	3	3
O79875	O79875	4	4	4			sp|O79875|NU2M_PIG NADH-ubiquinone oxidoreductase chain 2 OS=Sus scrofa OX=9823 GN=MT-ND2 PE=1 SV=2	1	4	4	4	1	1	2	1	1	1	1	1	1	2	2	2	3	1	1	1	1	1	1	1	2	2	1	2	2	1	1	2	1	1	2	1	1	0	1	1	1	1
O79876;P00395	O79876	3;1	3;1	3;1			sp|O79876|COX1_PIG Cytochrome c oxidase subunit 1 OS=Sus scrofa OX=9823 GN=MT-CO1 PE=3 SV=2	2	3	3	3	3	3	3	2	2	3	2	2	3	3	2	2	2	3	3	1	2	2	1	2	2	2	2	1	3	2	2	3	3	2	2	3	2	2	2	2	2	3
O79881;P03905	O79881;P03905	3;2	3;2	3;2	NADH-ubiquinone oxidoreductase chain 4	MT-ND4	sp|O79881|NU4M_PIG NADH-ubiquinone oxidoreductase chain 4 OS=Sus scrofa OX=9823 GN=MT-ND4 PE=1 SV=2;sp|P03905|NU4M_HUMAN NADH-ubiquinone oxidoreductase chain 4 OS=Homo sapiens OX=9606 GN=MT-ND4 PE=1 SV=1	2	3	3	3	2	0	1	1	1	1	1	0	2	1	1	1	0	2	2	1	1	1	1	1	2	2	2	1	1	1	1	2	1	0	0	2	2	2	1	0	1	2
O89939;O89940	O89939;O89940	1;1	1;1	1;1			sp|O89939|GAG_HV1SE Gag polyprotein OS=Human immunodeficiency virus type 1 group M subtype G (isolate SE6165) OX=388824 GN=gag PE=3 SV=3;sp|O89940|POL_HV1SE Gag-Pol polyprotein OS=Human immunodeficiency virus type 1 group M subtype G (isolate SE6165) OX=38	2	1	1	1	0	0	0	0	0	0	0	0	0	0	0	0	0	0	0	0	0	0	1	0	0	0	0	0	0	0	0	0	0	0	0	0	1	0	0	0	0	0
O90370;O90368;P13886;Q8JUX6;Q5XXP4	O90370;O90368;P13886;Q8JUX6;Q5XXP4	2;2;2;1;1	2;2;2;1;1	2;2;2;1;1			sp|O90370|POLN_ONNVI Polyprotein P1234 OS=Onyong-nyong virus (strain Igbo Ora) OX=79899 PE=3 SV=1;sp|O90368|POLN_ONNVS Polyprotein P1234 OS=Onyong-nyong virus (strain SG650) OX=374989 PE=3 SV=1;sp|P13886|POLN_ONNVG Polyprotein P1234 OS=Onyong-nyong viru	5	2	2	2	0	1	0	0	1	1	0	0	0	0	0	0	1	0	0	0	1	1	0	0	1	1	0	0	1	1	0	0	0	0	1	0	0	1	0	0	0	0
O94766-2;O94766	O94766-2;O94766	3;3	3;3	3;3	Galactosylgalactosylxylosylprotein 3-beta-glucuronosyltransferase 3	B3GAT3	sp|O94766-2|B3GA3_HUMAN Isoform 2 of Galactosylgalactosylxylosylprotein 3-beta-glucuronosyltransferase 3 OS=Homo sapiens OX=9606 GN=B3GAT3;sp|O94766|B3GA3_HUMAN Galactosylgalactosylxylosylprotein 3-beta-glucuronosyltransferase 3 OS=Homo sapiens OX=9606 GN=	2	3	3	3	1	0	3	3	2	0	1	1	1	1	1	1	2	0	0	1	2	1	2	1	3	0	1	1	2	0	3	2	1	1	3	2	2	1	2	2	2	1
O94776;O94776-2	O94776;O94776-2	6;5	6;5	5;4	Metastasis-associated protein MTA2	MTA2	sp|O94776|MTA2_HUMAN Metastasis-associated protein MTA2 OS=Homo sapiens OX=9606 GN=MTA2 PE=1 SV=1;sp|O94776-2|MTA2_HUMAN Isoform 2 of Metastasis-associated protein MTA2 OS=Homo sapiens OX=9606 GN=MTA2	2	6	6	5	3	2	4	4	1	3	3	4	2	3	3	3	3	3	3	3	3	3	3	3	2	4	3	4	3	4	3	4	4	4	5	5	2	3	4	4	3	2
O94788-4;O94788-2;O94788-3;O94788	O94788-4;O94788-2;O94788-3;O94788	1;1;1;1	1;1;1;1	1;1;1;1	Retinal dehydrogenase 2	ALDH1A2	sp|O94788-4|AL1A2_HUMAN Isoform 4 of Retinal dehydrogenase 2 OS=Homo sapiens OX=9606 GN=ALDH1A2;sp|O94788-2|AL1A2_HUMAN Isoform 2 of Retinal dehydrogenase 2 OS=Homo sapiens OX=9606 GN=ALDH1A2;sp|O94788-3|AL1A2_HUMAN Isoform 3 of Retinal dehydrogenase 2 OS=	4	1	1	1	0	0	0	0	0	0	0	0	0	0	0	0	0	0	0	0	1	0	0	0	0	0	0	0	0	0	0	0	0	0	0	0	0	0	0	0	0	0
O94805	O94805	4	3	3	Actin-like protein 6B	ACTL6B	sp|O94805|ACL6B_HUMAN Actin-like protein 6B OS=Homo sapiens OX=9606 GN=ACTL6B PE=1 SV=1	1	4	3	3	1	1	2	2	1	1	2	1	2	2	0	2	1	2	2	2	1	1	0	2	3	2	2	2	2	2	1	2	3	1	1	2	0	1	2	2	0	0
O94811	O94811	1	1	1	Tubulin polymerization-promoting protein	TPPP	sp|O94811|TPPP_HUMAN Tubulin polymerization-promoting protein OS=Homo sapiens OX=9606 GN=TPPP PE=1 SV=1	1	1	1	1	1	1	1	1	1	1	1	1	1	1	1	1	1	1	1	1	1	1	1	1	1	1	1	1	1	1	1	1	1	1	1	1	1	1	1	1	1	1
O94813-3;O94813-2;O94813	O94813-3;O94813-2;O94813	1;1;1	1;1;1	1;1;1	Slit homolog 2 protein;Slit homolog 2 protein N-product;Slit homolog 2 protein C-product	SLIT2	sp|O94813-3|SLIT2_HUMAN Isoform 3 of Slit homolog 2 protein OS=Homo sapiens OX=9606 GN=SLIT2;sp|O94813-2|SLIT2_HUMAN Isoform 2 of Slit homolog 2 protein OS=Homo sapiens OX=9606 GN=SLIT2;sp|O94813|SLIT2_HUMAN Slit homolog 2 protein OS=Homo sapiens OX=9606 G	3	1	1	1	0	0	0	0	1	0	0	0	0	0	0	0	0	0	0	0	0	0	0	0	0	1	0	0	1	0	0	0	0	0	0	0	0	0	0	0	0	0
O94817	O94817	1	1	1	Ubiquitin-like protein ATG12	ATG12	sp|O94817|ATG12_HUMAN Ubiquitin-like protein ATG12 OS=Homo sapiens OX=9606 GN=ATG12 PE=1 SV=1	1	1	1	1	0	0	0	0	0	0	0	1	0	0	0	0	0	0	0	0	0	0	0	0	0	0	0	0	0	0	0	0	0	0	0	0	1	0	0	0	1	0
O94819	O94819	2	2	2	Kelch repeat and BTB domain-containing protein 11	KBTBD11	sp|O94819|KBTBB_HUMAN Kelch repeat and BTB domain-containing protein 11 OS=Homo sapiens OX=9606 GN=KBTBD11 PE=1 SV=1	1	2	2	2	0	0	1	1	1	2	1	1	1	1	1	1	1	1	0	1	1	1	1	1	1	1	2	1	1	1	1	0	1	1	1	0	1	0	1	1	0	0
O94826	O94826	15	15	15	Mitochondrial import receptor subunit TOM70	TOMM70A	sp|O94826|TOM70_HUMAN Mitochondrial import receptor subunit TOM70 OS=Homo sapiens OX=9606 GN=TOMM70 PE=1 SV=1	1	15	15	15	9	7	10	10	9	7	9	12	9	9	9	8	9	8	11	10	9	9	9	9	8	10	10	9	10	8	9	8	10	7	10	10	9	11	9	10	9	11
O94829	O94829	3	3	3	Importin-13	IPO13	sp|O94829|IPO13_HUMAN Importin-13 OS=Homo sapiens OX=9606 GN=IPO13 PE=1 SV=3	1	3	3	3	0	0	1	0	0	0	0	0	0	0	0	0	0	0	0	0	0	0	0	0	0	0	0	0	0	0	0	0	0	0	0	0	0	0	0	0	0	0
O94842-3;O94842-2;O94842;Q96NM4-3;Q96NM4-4;O15405-2;O15405	O94842-3;O94842-2;O94842	3;3;3;1;1;1;1	3;3;3;1;1;1;1	2;2;2;0;0;0;0	TOX high mobility group box family member 4	TOX4	sp|O94842-3|TOX4_HUMAN Isoform 3 of TOX high mobility group box family member 4 OS=Homo sapiens OX=9606 GN=TOX4;sp|O94842-2|TOX4_HUMAN Isoform 2 of TOX high mobility group box family member 4 OS=Homo sapiens OX=9606 GN=TOX4;sp|O94842|TOX4_HUMAN TOX high mo	7	3	3	2	1	1	1	1	0	1	0	1	1	0	0	1	1	0	1	1	0	0	0	1	0	1	1	0	0	1	1	1	1	2	1	1	0	0	1	0	0	0
O94855;O94855-2	O94855;O94855-2	3;3	3;3	3;3	Protein transport protein Sec24D	SEC24D	sp|O94855|SC24D_HUMAN Protein transport protein Sec24D OS=Homo sapiens OX=9606 GN=SEC24D PE=1 SV=2;sp|O94855-2|SC24D_HUMAN Isoform 2 of Protein transport protein Sec24D OS=Homo sapiens OX=9606 GN=SEC24D	2	3	3	3	0	0	0	0	0	0	0	0	0	0	0	0	1	0	0	0	1	0	0	0	1	1	0	0	0	0	0	0	0	0	0	0	1	0	0	0	0	0
O94856-9;O94856-4;O94856-12;O94856-6;O94856-13;O94856;O94856-11;O94856-7;O94856-5;O94856-10;O94856-3;O94856-8;O94856-2	O94856-9;O94856-4;O94856-12;O94856-6;O94856-13;O94856;O94856-11;O94856-7;O94856-5;O94856-10;O94856-3;O94856-8;O94856-2	16;15;15;14;14;14;13;13;13;12;12;12;8	16;15;15;14;14;14;13;13;13;12;12;12;8	16;15;15;14;14;14;13;13;13;12;12;12;8	Neurofascin	NFASC	sp|O94856-9|NFASC_HUMAN Isoform 9 of Neurofascin OS=Homo sapiens OX=9606 GN=NFASC;sp|O94856-4|NFASC_HUMAN Isoform 4 of Neurofascin OS=Homo sapiens OX=9606 GN=NFASC;sp|O94856-12|NFASC_HUMAN Isoform 12 of Neurofascin OS=Homo sapiens OX=9606 GN=NFASC;sp|O9485	13	16	16	16	9	10	11	10	9	9	12	10	11	10	12	10	10	9	11	8	11	7	9	8	11	9	9	9	11	10	10	11	11	10	11	12	10	11	11	11	10	11
O94874;O94874-2;O94874-3	O94874;O94874-2;O94874-3	5;5;4	5;5;4	5;5;4	E3 UFM1-protein ligase 1	UFL1	sp|O94874|UFL1_HUMAN E3 UFM1-protein ligase 1 OS=Homo sapiens OX=9606 GN=UFL1 PE=1 SV=2;sp|O94874-2|UFL1_HUMAN Isoform 2 of E3 UFM1-protein ligase 1 OS=Homo sapiens OX=9606 GN=UFL1;sp|O94874-3|UFL1_HUMAN Isoform 3 of E3 UFM1-protein ligase 1 OS=Homo sapien	3	5	5	5	2	2	2	1	2	1	2	0	1	0	0	0	1	1	2	1	2	1	0	0	2	1	3	0	2	2	2	1	1	2	1	3	0	0	2	1	1	2
O94875-5;O94875-3;O94875-4;O94875-12;O94875-10;O94875-9;O94875-8;O94875;O94875-11;O94875-7;O94875-6	O94875-5;O94875-3;O94875-4;O94875-12;O94875-10;O94875-9;O94875-8;O94875;O94875-11;O94875-7	5;5;5;5;5;4;4;4;4;3;1	1;1;1;1;1;0;0;0;0;0;0	1;1;1;1;1;0;0;0;0;0;0	Sorbin and SH3 domain-containing protein 2	SORBS2	sp|O94875-5|SRBS2_HUMAN Isoform 5 of Sorbin and SH3 domain-containing protein 2 OS=Homo sapiens OX=9606 GN=SORBS2;sp|O94875-3|SRBS2_HUMAN Isoform 3 of Sorbin and SH3 domain-containing protein 2 OS=Homo sapiens OX=9606 GN=SORBS2;sp|O94875-4|SRBS2_HUMAN Isof	11	5	1	1	3	4	2	4	2	3	2	3	3	3	3	1	5	3	3	5	4	4	2	4	3	3	3	4	5	2	3	5	4	3	4	5	3	4	4	5	4	2
O94875-2	O94875-2	5	5	1	Sorbin and SH3 domain-containing protein 2	SORBS2	sp|O94875-2|SRBS2_HUMAN Isoform 2 of Sorbin and SH3 domain-containing protein 2 OS=Homo sapiens OX=9606 GN=SORBS2	1	5	5	1	3	4	2	4	3	4	3	3	4	4	3	1	4	4	3	4	4	5	2	3	4	4	3	4	4	2	4	4	5	3	4	4	3	5	4	5	4	2
O94880-2;O94880	O94880-2;O94880	2;2	2;2	2;2	PHD finger protein 14	PHF14	sp|O94880-2|PHF14_HUMAN Isoform 2 of PHD finger protein 14 OS=Homo sapiens OX=9606 GN=PHF14;sp|O94880|PHF14_HUMAN PHD finger protein 14 OS=Homo sapiens OX=9606 GN=PHF14 PE=1 SV=2	2	2	2	2	0	0	0	0	0	1	0	0	0	0	0	0	0	1	0	0	1	0	0	0	0	1	1	0	0	0	0	0	0	0	0	0	0	0	0	0	0	0
O94888	O94888	4	4	4	UBX domain-containing protein 7	UBXN7	sp|O94888|UBXN7_HUMAN UBX domain-containing protein 7 OS=Homo sapiens OX=9606 GN=UBXN7 PE=1 SV=2	1	4	4	4	4	3	2	1	3	3	0	1	4	2	1	1	3	2	1	1	3	4	2	2	4	4	2	1	3	3	1	2	3	3	4	3	3	2	3	0	4	3
O94905;O94905-2;O94905-3;O75477	O94905	7;1;1;1	7;1;1;1	7;1;1;1	Erlin-2	ERLIN2	sp|O94905|ERLN2_HUMAN Erlin-2 OS=Homo sapiens OX=9606 GN=ERLIN2 PE=1 SV=1	4	7	7	7	3	1	3	1	4	3	1	1	4	3	1	2	3	4	3	3	4	2	2	2	2	4	4	2	3	4	3	2	1	3	4	3	4	1	2	2	3	1
O94906-2;O94906	O94906-2;O94906	5;5	5;5	5;5	Pre-mRNA-processing factor 6	PRPF6	sp|O94906-2|PRP6_HUMAN Isoform 2 of Pre-mRNA-processing factor 6 OS=Homo sapiens OX=9606 GN=PRPF6;sp|O94906|PRP6_HUMAN Pre-mRNA-processing factor 6 OS=Homo sapiens OX=9606 GN=PRPF6 PE=1 SV=1	2	5	5	5	2	1	1	1	0	1	0	2	0	0	0	0	0	1	0	0	1	0	0	0	2	1	0	1	1	0	0	0	0	0	0	0	2	1	0	1	1	0
O94910;O94910-2	O94910;O94910-2	4;3	4;3	4;3	Latrophilin-1	LPHN1	sp|O94910|AGRL1_HUMAN Adhesion G protein-coupled receptor L1 OS=Homo sapiens OX=9606 GN=ADGRL1 PE=1 SV=1;sp|O94910-2|AGRL1_HUMAN Isoform 2 of Adhesion G protein-coupled receptor L1 OS=Homo sapiens OX=9606 GN=ADGRL1	2	4	4	4	1	1	1	1	1	1	1	1	0	0	2	0	1	1	0	1	2	2	1	0	1	1	0	1	0	0	0	1	1	1	0	2	2	1	0	2	0	2
O94911;O94911-3	O94911;O94911-3	3;3	3;3	2;2	ATP-binding cassette sub-family A member 8	ABCA8	sp|O94911|ABCA8_HUMAN ATP-binding cassette sub-family A member 8 OS=Homo sapiens OX=9606 GN=ABCA8 PE=1 SV=3;sp|O94911-3|ABCA8_HUMAN Isoform 3 of ATP-binding cassette sub-family A member 8 OS=Homo sapiens OX=9606 GN=ABCA8	2	3	3	2	0	0	0	0	0	0	0	0	1	0	0	0	0	0	0	0	0	0	0	0	0	0	0	0	0	0	0	0	0	0	0	0	0	0	1	0	1	0
O94915;O94915-2	O94915	10;1	10;1	10;1	Protein furry homolog-like	FRYL	sp|O94915|FRYL_HUMAN Protein furry homolog-like OS=Homo sapiens OX=9606 GN=FRYL PE=1 SV=2	2	10	10	10	0	0	2	1	2	1	2	0	2	2	0	0	3	0	1	2	1	1	0	2	1	1	1	1	1	1	2	0	0	1	1	0	0	0	1	1	0	0
O94925	O94925	17	17	5	Glutaminase kidney isoform, mitochondrial	GLS	sp|O94925|GLSK_HUMAN Glutaminase kidney isoform, mitochondrial OS=Homo sapiens OX=9606 GN=GLS PE=1 SV=1	1	17	17	5	10	10	7	11	10	7	9	10	10	9	9	10	11	7	10	8	11	10	9	9	9	9	11	11	10	10	9	9	10	9	11	10	10	8	8	9	10	8
O94925-3	O94925-3	14	2	2	Glutaminase kidney isoform, mitochondrial	GLS	sp|O94925-3|GLSK_HUMAN Isoform 3 of Glutaminase kidney isoform, mitochondrial OS=Homo sapiens OX=9606 GN=GLS	1	14	2	2	7	8	6	9	8	7	8	9	8	7	8	8	9	6	9	8	9	9	8	8	7	8	9	9	9	10	6	8	8	8	10	10	8	7	8	9	8	7
O94929-2;O94929-3;O94929	O94929-2;O94929-3;O94929	1;1;1	1;1;1	1;1;1	Actin-binding LIM protein 3	ABLIM3	sp|O94929-2|ABLM3_HUMAN Isoform 2 of Actin-binding LIM protein 3 OS=Homo sapiens OX=9606 GN=ABLIM3;sp|O94929-3|ABLM3_HUMAN Isoform 3 of Actin-binding LIM protein 3 OS=Homo sapiens OX=9606 GN=ABLIM3;sp|O94929|ABLM3_HUMAN Actin-binding LIM protein 3 OS=Homo	3	1	1	1	0	0	0	0	0	1	0	0	0	1	0	0	0	0	1	0	0	1	0	0	0	0	1	0	1	0	0	0	0	0	0	0	0	0	0	0	0	0
O94952-1;O94952	O94952-1;O94952	2;2	2;2	2;2	F-box only protein 21	FBXO21	sp|O94952-1|FBX21_HUMAN Isoform 2 of F-box only protein 21 OS=Homo sapiens OX=9606 GN=FBXO21;sp|O94952|FBX21_HUMAN F-box only protein 21 OS=Homo sapiens OX=9606 GN=FBXO21 PE=2 SV=2	2	2	2	2	1	1	0	0	1	1	0	0	1	0	0	1	1	2	1	0	1	1	0	0	0	1	0	0	1	0	1	0	0	0	0	0	1	0	0	0	1	1
O94953-2;O94953	O94953-2;O94953	2;2	2;2	2;2	Lysine-specific demethylase 4B	KDM4B	sp|O94953-2|KDM4B_HUMAN Isoform 2 of Lysine-specific demethylase 4B OS=Homo sapiens OX=9606 GN=KDM4B;sp|O94953|KDM4B_HUMAN Lysine-specific demethylase 4B OS=Homo sapiens OX=9606 GN=KDM4B PE=1 SV=4	2	2	2	2	0	0	0	0	0	0	1	0	0	0	0	0	0	1	0	0	0	0	0	0	0	1	1	0	0	0	2	0	0	0	2	0	1	1	1	0	0	1
O94966-4;O94966-3;O94966-7;O94966-6	O94966-4;O94966-3;O94966-7;O94966-6	4;4;4;4	4;4;4;4	1;1;1;1	Ubiquitin carboxyl-terminal hydrolase 19	USP19	sp|O94966-4|UBP19_HUMAN Isoform 4 of Ubiquitin carboxyl-terminal hydrolase 19 OS=Homo sapiens OX=9606 GN=USP19;sp|O94966-3|UBP19_HUMAN Isoform 3 of Ubiquitin carboxyl-terminal hydrolase 19 OS=Homo sapiens OX=9606 GN=USP19;sp|O94966-7|UBP19_HUMAN Isoform 7	4	4	4	1	0	2	2	0	0	1	0	0	0	1	0	0	2	3	1	0	0	2	0	0	1	1	1	0	1	1	1	0	0	1	1	1	0	0	1	0	0	0
O94967-2;O94967;O94967-3;O94967-4	O94967-2;O94967;O94967-3;O94967-4	9;9;9;9	9;9;9;9	9;9;9;9	WD repeat-containing protein 47	WDR47	sp|O94967-2|WDR47_HUMAN Isoform 2 of WD repeat-containing protein 47 OS=Homo sapiens OX=9606 GN=WDR47;sp|O94967|WDR47_HUMAN WD repeat-containing protein 47 OS=Homo sapiens OX=9606 GN=WDR47 PE=1 SV=1;sp|O94967-3|WDR47_HUMAN Isoform 3 of WD repeat-containing	4	9	9	9	3	3	2	3	2	3	3	2	1	2	4	5	2	4	5	4	3	2	3	2	3	3	2	4	3	3	2	3	3	2	3	3	3	3	4	2	2	4
O94973-2;O94973-3;O94973	O94973-2;O94973-3;O94973	14;13;13	8;7;7	8;7;7	AP-2 complex subunit alpha-2	AP2A2	sp|O94973-2|AP2A2_HUMAN Isoform 2 of AP-2 complex subunit alpha-2 OS=Homo sapiens OX=9606 GN=AP2A2;sp|O94973-3|AP2A2_HUMAN Isoform 3 of AP-2 complex subunit alpha-2 OS=Homo sapiens OX=9606 GN=AP2A2;sp|O94973|AP2A2_HUMAN AP-2 complex subunit alpha-2 OS=Homo	3	14	8	8	9	9	8	9	10	8	10	8	9	9	9	13	9	8	9	8	10	9	10	11	10	10	8	11	10	7	9	9	11	10	11	11	8	8	10	8	10	10
O94979-7;O94979-6;O94979-3;O94979-10;O94979-4;O94979-9;O94979-2;O94979;O94979-8;O94979-5	O94979-7;O94979-6;O94979-3;O94979-10;O94979-4;O94979-9;O94979-2;O94979;O94979-8;O94979-5	2;2;2;2;2;2;2;2;2;1	2;2;2;2;2;2;2;2;2;1	2;2;2;2;2;2;2;2;2;1	Protein transport protein Sec31A	SEC31A	sp|O94979-7|SC31A_HUMAN Isoform 7 of Protein transport protein Sec31A OS=Homo sapiens OX=9606 GN=SEC31A;sp|O94979-6|SC31A_HUMAN Isoform 6 of Protein transport protein Sec31A OS=Homo sapiens OX=9606 GN=SEC31A;sp|O94979-3|SC31A_HUMAN Isoform 3 of Protein tra	10	2	2	2	0	0	0	0	0	0	1	0	0	0	0	0	0	0	0	0	0	0	0	0	0	0	0	0	0	0	0	0	0	0	0	0	0	0	0	0	0	0
O94985-2;O94985	O94985-2;O94985	4;4	4;4	4;4	Calsyntenin-1;Soluble Alc-alpha;CTF1-alpha	CLSTN1	sp|O94985-2|CSTN1_HUMAN Isoform 2 of Calsyntenin-1 OS=Homo sapiens OX=9606 GN=CLSTN1;sp|O94985|CSTN1_HUMAN Calsyntenin-1 OS=Homo sapiens OX=9606 GN=CLSTN1 PE=1 SV=1	2	4	4	4	0	0	0	0	0	1	1	0	0	0	0	0	0	0	0	0	1	0	0	0	1	0	0	0	0	0	0	0	1	0	0	0	0	0	0	1	0	0
O94992	O94992	2	2	2	Protein HEXIM1	HEXIM1	sp|O94992|HEXI1_HUMAN Protein HEXIM1 OS=Homo sapiens OX=9606 GN=HEXIM1 PE=1 SV=1	1	2	2	2	0	0	0	0	0	0	1	0	0	0	0	0	0	0	0	1	0	0	0	1	0	1	0	1	0	0	1	1	0	0	1	2	0	0	0	1	0	0
O95057	O95057	3	3	3	GTP-binding protein Di-Ras1	DIRAS1	sp|O95057|DIRA1_HUMAN GTP-binding protein Di-Ras1 OS=Homo sapiens OX=9606 GN=DIRAS1 PE=1 SV=1	1	3	3	3	2	2	2	2	2	2	2	1	1	2	2	2	2	2	1	0	3	2	1	1	3	2	0	1	2	2	1	1	2	1	2	2	1	1	2	1	1	1
O95071-2;O95071	O95071-2;O95071	3;3	3;3	3;3	E3 ubiquitin-protein ligase UBR5	UBR5	sp|O95071-2|UBR5_HUMAN Isoform 2 of E3 ubiquitin-protein ligase UBR5 OS=Homo sapiens OX=9606 GN=UBR5;sp|O95071|UBR5_HUMAN E3 ubiquitin-protein ligase UBR5 OS=Homo sapiens OX=9606 GN=UBR5 PE=1 SV=2	2	3	3	3	1	0	0	0	1	0	0	1	0	0	0	0	0	0	0	1	1	0	0	1	1	0	1	0	1	0	1	0	0	0	0	0	1	0	0	0	0	0
O95081-2;O95081	O95081-2;O95081	2;2	2;2	2;2	Arf-GAP domain and FG repeat-containing protein 2	AGFG2	sp|O95081-2|AGFG2_HUMAN Isoform 2 of Arf-GAP domain and FG repeat-containing protein 2 OS=Homo sapiens OX=9606 GN=AGFG2;sp|O95081|AGFG2_HUMAN Arf-GAP domain and FG repeat-containing protein 2 OS=Homo sapiens OX=9606 GN=AGFG2 PE=1 SV=2	2	2	2	2	0	0	1	0	0	0	0	0	0	0	0	0	0	1	0	0	0	0	0	0	1	0	0	1	1	0	0	0	0	0	0	0	0	0	0	0	0	1
O95104;O95104-3;O95104-2	O95104;O95104-3;O95104-2	4;4;3	4;4;3	3;3;2	Splicing factor, arginine/serine-rich 15	SCAF4	sp|O95104|SCAF4_HUMAN SR-related and CTD-associated factor 4 OS=Homo sapiens OX=9606 GN=SCAF4 PE=1 SV=3;sp|O95104-3|SCAF4_HUMAN Isoform 3 of SR-related and CTD-associated factor 4 OS=Homo sapiens OX=9606 GN=SCAF4;sp|O95104-2|SCAF4_HUMAN Isoform 2 of SR-rel	3	4	4	3	1	2	2	2	1	3	1	2	1	2	2	2	2	1	1	1	2	1	1	1	3	1	1	2	3	1	1	1	1	1	1	2	1	2	2	2	2	2
O95140;O95140-2	O95140	6;1	6;1	6;1	Mitofusin-2	MFN2	sp|O95140|MFN2_HUMAN Mitofusin-2 OS=Homo sapiens OX=9606 GN=MFN2 PE=1 SV=3	2	6	6	6	3	2	2	2	4	3	2	2	3	2	2	2	4	4	2	3	4	2	3	2	4	4	2	2	4	3	3	2	3	2	2	3	2	3	2	2	3	2
O95154	O95154	1	1	1	Aflatoxin B1 aldehyde reductase member 3	AKR7A3	sp|O95154|ARK73_HUMAN Aflatoxin B1 aldehyde reductase member 3 OS=Homo sapiens OX=9606 GN=AKR7A3 PE=1 SV=2	1	1	1	1	1	1	1	1	1	1	1	1	1	1	1	1	1	1	1	1	1	1	1	1	1	1	1	1	1	1	1	1	1	1	1	1	1	1	1	1	1	1
O95155-2;O95155;O95155-4;O95155-3	O95155-2;O95155;O95155-4;O95155-3	12;12;12;10	12;12;12;10	12;12;12;10	Ubiquitin conjugation factor E4 B	UBE4B	sp|O95155-2|UBE4B_HUMAN Isoform 2 of Ubiquitin conjugation factor E4 B OS=Homo sapiens OX=9606 GN=UBE4B;sp|O95155|UBE4B_HUMAN Ubiquitin conjugation factor E4 B OS=Homo sapiens OX=9606 GN=UBE4B PE=1 SV=1;sp|O95155-4|UBE4B_HUMAN Isoform 4 of Ubiquitin conjug	4	12	12	12	1	2	3	1	1	2	3	1	4	3	2	1	2	2	4	3	3	1	1	2	2	3	3	3	2	3	3	3	1	2	3	3	0	2	3	1	0	1
O95163	O95163	1	1	1	Elongator complex protein 1	IKBKAP	sp|O95163|ELP1_HUMAN Elongator complex protein 1 OS=Homo sapiens OX=9606 GN=ELP1 PE=1 SV=3	1	1	1	1	1	0	0	0	1	0	0	0	0	0	1	1	1	0	0	0	0	0	0	0	1	0	0	0	1	0	0	0	0	0	0	0	1	0	0	0	0	1
O95164	O95164	1	1	1	Ubiquitin-like protein 3	UBL3	sp|O95164|UBL3_HUMAN Ubiquitin-like protein 3 OS=Homo sapiens OX=9606 GN=UBL3 PE=1 SV=1	1	1	1	1	0	0	0	0	0	0	0	0	0	0	0	0	0	0	0	0	0	0	0	0	0	0	0	0	0	0	0	0	0	0	0	0	0	0	0	0	0	0
O95169-3;O95169-2;O95169	O95169-3;O95169-2;O95169	2;2;2	2;2;2	2;2;2	NADH dehydrogenase [ubiquinone] 1 beta subcomplex subunit 8, mitochondrial	NDUFB8	sp|O95169-3|NDUB8_HUMAN Isoform 3 of NADH dehydrogenase [ubiquinone] 1 beta subcomplex subunit 8, mitochondrial OS=Homo sapiens OX=9606 GN=NDUFB8;sp|O95169-2|NDUB8_HUMAN Isoform 2 of NADH dehydrogenase [ubiquinone] 1 beta subcomplex subunit 8, mitochondria	3	2	2	2	1	1	1	0	1	1	1	1	1	1	1	1	1	1	1	1	1	1	1	1	1	1	1	1	1	1	1	1	1	1	1	1	1	1	1	1	1	1
O95197-7;O95197-2;O95197;O95197-3;O95197-4;O95197-5	O95197-7;O95197-2;O95197;O95197-3;O95197-4	3;3;3;2;2;1	3;3;3;2;2;1	3;3;3;2;2;1	Reticulon-3	RTN3	sp|O95197-7|RTN3_HUMAN Isoform 7 of Reticulon-3 OS=Homo sapiens OX=9606 GN=RTN3;sp|O95197-2|RTN3_HUMAN Isoform 2 of Reticulon-3 OS=Homo sapiens OX=9606 GN=RTN3;sp|O95197|RTN3_HUMAN Reticulon-3 OS=Homo sapiens OX=9606 GN=RTN3 PE=1 SV=2;sp|O95197-3|RTN3_HUMA	6	3	3	3	2	1	1	1	1	2	1	2	2	1	1	2	1	2	3	1	1	2	1	1	2	2	1	2	2	3	2	2	2	2	2	2	1	2	2	1	0	2
O95202;O95202-2;O95202-3	O95202	5;1;1	5;1;1	5;1;1	LETM1 and EF-hand domain-containing protein 1, mitochondrial	LETM1	sp|O95202|LETM1_HUMAN Mitochondrial proton/calcium exchanger protein OS=Homo sapiens OX=9606 GN=LETM1 PE=1 SV=1	3	5	5	5	1	2	1	2	3	3	1	1	2	3	2	1	2	3	2	2	2	2	2	2	1	2	2	2	4	1	3	2	1	1	1	3	1	1	2	2	1	1
O95219-2;O95219	O95219-2;O95219	1;1	1;1	1;1	Sorting nexin-4	SNX4	sp|O95219-2|SNX4_HUMAN Isoform 2 of Sorting nexin-4 OS=Homo sapiens OX=9606 GN=SNX4;sp|O95219|SNX4_HUMAN Sorting nexin-4 OS=Homo sapiens OX=9606 GN=SNX4 PE=1 SV=1	2	1	1	1	1	0	0	0	1	1	0	0	0	1	0	0	1	1	0	1	1	1	0	1	1	1	0	0	0	0	0	0	1	1	0	0	1	0	0	0	1	0
O95232;O95232-2	O95232	5;2	5;2	5;2	Luc7-like protein 3	LUC7L3	sp|O95232|LC7L3_HUMAN Luc7-like protein 3 OS=Homo sapiens OX=9606 GN=LUC7L3 PE=1 SV=2	2	5	5	5	2	2	1	1	3	3	2	0	3	1	2	1	3	2	1	1	3	1	2	0	3	2	2	1	4	3	1	3	4	2	3	3	3	3	1	0	3	3
O95248;O95248-5;O95248-4	O95248;O95248-5;O95248-4	9;9;9	9;9;9	9;9;9	Myotubularin-related protein 5	SBF1	sp|O95248|MTMR5_HUMAN Myotubularin-related protein 5 OS=Homo sapiens OX=9606 GN=SBF1 PE=1 SV=4;sp|O95248-5|MTMR5_HUMAN Isoform 5 of Myotubularin-related protein 5 OS=Homo sapiens OX=9606 GN=SBF1;sp|O95248-4|MTMR5_HUMAN Isoform 4 of Myotubularin-related pro	3	9	9	9	0	1	2	3	0	3	1	4	0	3	1	1	0	2	2	3	0	0	1	3	1	2	3	3	1	0	2	3	1	2	1	1	0	1	2	2	0	1
O95260-2;O95260	O95260-2;O95260	3;2	3;2	3;2	Arginyl-tRNA--protein transferase 1	ATE1	sp|O95260-2|ATE1_HUMAN Isoform ATE1-2 of Arginyl-tRNA--protein transferase 1 OS=Homo sapiens OX=9606 GN=ATE1;sp|O95260|ATE1_HUMAN Arginyl-tRNA--protein transferase 1 OS=Homo sapiens OX=9606 GN=ATE1 PE=1 SV=2	2	3	3	3	1	1	1	1	0	0	1	2	0	1	1	0	0	3	1	1	0	2	2	1	1	1	1	1	2	0	1	1	2	2	2	1	2	0	1	2	2	1
O95263-2;O95263-6;O95263-4;O95263	O95263-2;O95263-6;O95263-4;O95263	1;1;1;1	1;1;1;1	1;1;1;1	High affinity cAMP-specific and IBMX-insensitive 3,5-cyclic phosphodiesterase 8B	PDE8B	sp|O95263-2|PDE8B_HUMAN Isoform 2 of High affinity cAMP-specific and IBMX-insensitive 3,5-cyclic phosphodiesterase 8B OS=Homo sapiens OX=9606 GN=PDE8B;sp|O95263-6|PDE8B_HUMAN Isoform 6 of High affinity cAMP-specific and IBMX-insensitive 3,5-cyclic phos	4	1	1	1	0	0	0	0	0	0	0	0	0	0	0	0	0	0	0	0	0	0	1	0	0	0	0	0	0	0	0	0	0	0	0	0	0	0	0	0	0	0
O95299;O95299-2	O95299;O95299-2	1;1	1;1	1;1	NADH dehydrogenase [ubiquinone] 1 alpha subcomplex subunit 10, mitochondrial	NDUFA10	sp|O95299|NDUAA_HUMAN NADH dehydrogenase [ubiquinone] 1 alpha subcomplex subunit 10, mitochondrial OS=Homo sapiens OX=9606 GN=NDUFA10 PE=1 SV=1;sp|O95299-2|NDUAA_HUMAN Isoform 2 of NADH dehydrogenase [ubiquinone] 1 alpha subcomplex subunit 10, mitochondria	2	1	1	1	0	0	1	1	0	0	1	1	1	0	1	1	0	0	1	1	1	0	0	1	1	0	1	1	1	1	1	0	0	1	1	1	0	0	1	1	1	0
O95319-5;O95319-2;O95319;O95319-4;O95319-3	O95319-5;O95319-2;O95319;O95319-4;O95319-3	2;2;2;2;2	2;2;2;2;2	2;2;2;2;2	CUGBP Elav-like family member 2	CELF2	sp|O95319-5|CELF2_HUMAN Isoform 5 of CUGBP Elav-like family member 2 OS=Homo sapiens OX=9606 GN=CELF2;sp|O95319-2|CELF2_HUMAN Isoform 2 of CUGBP Elav-like family member 2 OS=Homo sapiens OX=9606 GN=CELF2;sp|O95319|CELF2_HUMAN CUGBP Elav-like family member	5	2	2	2	1	2	2	1	2	2	2	1	2	1	1	1	2	2	2	1	2	2	1	1	2	2	2	1	2	2	2	1	2	2	1	2	2	2	2	1	1	2
O95336	O95336	2	2	2	6-phosphogluconolactonase	PGLS	sp|O95336|6PGL_HUMAN 6-phosphogluconolactonase OS=Homo sapiens OX=9606 GN=PGLS PE=1 SV=2	1	2	2	2	2	2	2	2	2	2	2	2	2	2	2	2	2	2	2	2	2	2	2	2	2	2	2	2	2	2	2	2	2	2	2	2	2	2	2	2	2	2
O95342	O95342	3	3	3	Bile salt export pump	ABCB11	sp|O95342|ABCBB_HUMAN Bile salt export pump OS=Homo sapiens OX=9606 GN=ABCB11 PE=1 SV=2	1	3	3	3	1	0	1	1	1	1	1	1	1	1	1	1	2	1	1	0	0	1	0	1	0	0	0	1	0	1	1	0	1	2	1	1	1	1	1	1	1	2
O95343	O95343	3	3	1	Homeobox protein SIX3	SIX3	sp|O95343|SIX3_HUMAN Homeobox protein SIX3 OS=Homo sapiens OX=9606 GN=SIX3 PE=1 SV=1	1	3	3	1	1	0	1	1	0	1	1	2	1	2	1	1	1	1	2	2	0	2	0	0	2	0	1	1	1	1	1	2	2	0	3	3	1	2	0	2	1	2
O95352-3;O95352;O95352-2	O95352-3;O95352;O95352-2	5;5;3	5;5;3	5;5;3	Ubiquitin-like modifier-activating enzyme ATG7	ATG7	sp|O95352-3|ATG7_HUMAN Isoform 3 of Ubiquitin-like modifier-activating enzyme ATG7 OS=Homo sapiens OX=9606 GN=ATG7;sp|O95352|ATG7_HUMAN Ubiquitin-like modifier-activating enzyme ATG7 OS=Homo sapiens OX=9606 GN=ATG7 PE=1 SV=1;sp|O95352-2|ATG7_HUMAN Isoform	3	5	5	5	1	1	1	4	1	0	2	3	1	2	3	2	1	2	1	3	2	2	3	3	1	1	2	3	2	1	2	2	1	2	1	3	2	1	1	1	3	2
O95365	O95365	2	2	2	Zinc finger and BTB domain-containing protein 7A	ZBTB7A	sp|O95365|ZBT7A_HUMAN Zinc finger and BTB domain-containing protein 7A OS=Homo sapiens OX=9606 GN=ZBTB7A PE=1 SV=1	1	2	2	2	0	0	0	0	0	0	0	0	0	0	0	0	0	0	0	0	0	0	0	0	0	0	0	1	0	0	0	0	0	0	0	0	0	0	0	0	0	0
O95372	O95372	4	4	4	Acyl-protein thioesterase 2	LYPLA2	sp|O95372|LYPA2_HUMAN Acyl-protein thioesterase 2 OS=Homo sapiens OX=9606 GN=LYPLA2 PE=1 SV=1	1	4	4	4	2	1	1	1	1	1	1	1	1	1	1	1	1	1	1	1	1	1	1	1	1	2	1	2	2	2	1	2	1	1	2	1	1	1	1	1	1	1
O95373	O95373	16	16	15	Importin-7	IPO7	sp|O95373|IPO7_HUMAN Importin-7 OS=Homo sapiens OX=9606 GN=IPO7 PE=1 SV=1	1	16	16	15	9	7	7	7	5	9	7	6	6	8	6	8	7	9	7	5	6	9	5	6	7	7	7	5	9	7	5	7	10	3	8	9	6	7	8	5	6	6
O95376	O95376	1	1	1	E3 ubiquitin-protein ligase ARIH2	ARIH2	sp|O95376|ARI2_HUMAN E3 ubiquitin-protein ligase ARIH2 OS=Homo sapiens OX=9606 GN=ARIH2 PE=1 SV=1	1	1	1	1	1	0	1	1	1	1	1	0	0	1	0	0	0	1	0	1	0	1	0	0	0	1	1	1	0	0	0	1	1	1	1	1	0	1	1	0	0	1
O95400	O95400	3	3	3	CD2 antigen cytoplasmic tail-binding protein 2	CD2BP2	sp|O95400|CD2B2_HUMAN CD2 antigen cytoplasmic tail-binding protein 2 OS=Homo sapiens OX=9606 GN=CD2BP2 PE=1 SV=1	1	3	3	3	1	0	0	0	1	0	0	0	0	0	0	0	2	0	0	0	1	0	0	0	0	0	0	0	0	0	0	0	0	0	1	0	1	0	0	0	1	0
O95405-2;O95405	O95405-2;O95405	2;2	2;2	2;2	Zinc finger FYVE domain-containing protein 9	ZFYVE9	sp|O95405-2|ZFYV9_HUMAN Isoform 2 of Zinc finger FYVE domain-containing protein 9 OS=Homo sapiens OX=9606 GN=ZFYVE9;sp|O95405|ZFYV9_HUMAN Zinc finger FYVE domain-containing protein 9 OS=Homo sapiens OX=9606 GN=ZFYVE9 PE=1 SV=2	2	2	2	2	0	0	1	1	1	1	0	1	0	1	0	0	1	0	0	0	0	0	0	1	0	0	0	1	1	1	1	1	1	0	1	1	0	1	0	0	0	0
O95425-2;O95425-4;O95425-3;O95425	O95425-2;O95425-4;O95425-3;O95425	1;1;1;1	1;1;1;1	1;1;1;1	Supervillin	SVIL	sp|O95425-2|SVIL_HUMAN Isoform 2 of Supervillin OS=Homo sapiens OX=9606 GN=SVIL;sp|O95425-4|SVIL_HUMAN Isoform SV4 of Supervillin OS=Homo sapiens OX=9606 GN=SVIL;sp|O95425-3|SVIL_HUMAN Isoform SV3 of Supervillin OS=Homo sapiens OX=9606 GN=SVIL;sp|O95425|SV	4	1	1	1	0	0	0	1	0	1	0	0	0	0	0	0	0	0	1	1	1	0	1	1	1	0	0	1	1	1	1	1	1	1	1	1	0	1	0	1	0	1
O95433-2;O95433	O95433-2;O95433	3;3	3;3	3;3	Activator of 90 kDa heat shock protein ATPase homolog 1	AHSA1	sp|O95433-2|AHSA1_HUMAN Isoform 2 of Activator of 90 kDa heat shock protein ATPase homolog 1 OS=Homo sapiens OX=9606 GN=AHSA1;sp|O95433|AHSA1_HUMAN Activator of 90 kDa heat shock protein ATPase homolog 1 OS=Homo sapiens OX=9606 GN=AHSA1 PE=1 SV=1	2	3	3	3	1	1	1	0	0	1	1	0	1	0	0	0	0	1	0	0	0	2	1	0	0	0	1	1	1	0	1	0	1	1	2	2	1	1	1	0	1	1
O95456-2;O95456	O95456-2;O95456	1;1	1;1	1;1	Proteasome assembly chaperone 1	PSMG1	sp|O95456-2|PSMG1_HUMAN Isoform 2 of Proteasome assembly chaperone 1 OS=Homo sapiens OX=9606 GN=PSMG1;sp|O95456|PSMG1_HUMAN Proteasome assembly chaperone 1 OS=Homo sapiens OX=9606 GN=PSMG1 PE=1 SV=1	2	1	1	1	1	1	0	0	1	1	0	0	1	0	1	0	1	1	1	0	1	1	1	0	1	1	1	0	1	1	1	1	1	1	1	1	1	1	0	0	1	1
O95460-3;O95460-4;O95460-2;O95460	O95460-3;O95460-4;O95460-2;O95460	1;1;1;1	1;1;1;1	1;1;1;1	Matrilin-4	MATN4	sp|O95460-3|MATN4_HUMAN Isoform 3 of Matrilin-4 OS=Homo sapiens OX=9606 GN=MATN4;sp|O95460-4|MATN4_HUMAN Isoform 4 of Matrilin-4 OS=Homo sapiens OX=9606 GN=MATN4;sp|O95460-2|MATN4_HUMAN Isoform 2 of Matrilin-4 OS=Homo sapiens OX=9606 GN=MATN4;sp|O95460|MAT	4	1	1	1	0	0	0	0	0	0	0	0	1	0	0	0	0	0	0	0	0	1	0	0	1	0	0	0	0	0	0	0	0	0	0	0	0	0	0	0	0	0
O95479;O95479-2	O95479;O95479-2	2;2	2;2	2;2	GDH/6PGL endoplasmic bifunctional protein;Glucose 1-dehydrogenase;6-phosphogluconolactonase	H6PD	sp|O95479|G6PE_HUMAN GDH/6PGL endoplasmic bifunctional protein OS=Homo sapiens OX=9606 GN=H6PD PE=1 SV=2;sp|O95479-2|G6PE_HUMAN Isoform 2 of GDH/6PGL endoplasmic bifunctional protein OS=Homo sapiens OX=9606 GN=H6PD	2	2	2	2	0	0	0	0	0	0	0	0	0	0	0	0	0	0	1	0	0	0	1	0	0	0	0	0	0	0	0	0	0	0	0	0	0	0	0	0	0	0
O95486;O95486-2	O95486;O95486-2	4;3	4;3	4;3	Protein transport protein Sec24A	SEC24A	sp|O95486|SC24A_HUMAN Protein transport protein Sec24A OS=Homo sapiens OX=9606 GN=SEC24A PE=1 SV=2;sp|O95486-2|SC24A_HUMAN Isoform 2 of Protein transport protein Sec24A OS=Homo sapiens OX=9606 GN=SEC24A	2	4	4	4	3	0	1	1	3	0	1	1	2	1	1	1	3	1	2	1	4	1	1	1	3	2	2	1	4	1	2	1	3	1	2	2	3	1	1	0	3	1
O95487-2;O95487;O95487-3	O95487-2;O95487;O95487-3	7;7;7	7;7;7	7;7;7	Protein transport protein Sec24B	SEC24B	sp|O95487-2|SC24B_HUMAN Isoform 2 of Protein transport protein Sec24B OS=Homo sapiens OX=9606 GN=SEC24B;sp|O95487|SC24B_HUMAN Protein transport protein Sec24B OS=Homo sapiens OX=9606 GN=SEC24B PE=1 SV=2;sp|O95487-3|SC24B_HUMAN Isoform 3 of Protein transpor	3	7	7	7	1	2	2	1	1	2	3	1	1	0	3	1	1	2	3	2	1	2	1	2	2	3	3	2	2	4	2	3	3	2	3	3	2	3	3	1	2	3
O95490-3;O95490-4;O95490-2;O95490-5;O95490;O95490-7;O95490-6	O95490-3;O95490-4;O95490-2;O95490-5;O95490;O95490-7;O95490-6	5;5;5;5;5;5;5	5;5;5;5;5;5;5	5;5;5;5;5;5;5	Latrophilin-2	LPHN2	sp|O95490-3|AGRL2_HUMAN Isoform 3 of Adhesion G protein-coupled receptor L2 OS=Homo sapiens OX=9606 GN=ADGRL2;sp|O95490-4|AGRL2_HUMAN Isoform 4 of Adhesion G protein-coupled receptor L2 OS=Homo sapiens OX=9606 GN=ADGRL2;sp|O95490-2|AGRL2_HUMAN Isoform 2 of	7	5	5	5	0	0	1	1	1	1	0	0	2	1	0	0	1	0	2	1	2	1	0	0	2	0	0	1	1	0	0	0	0	0	0	0	1	2	0	2	3	1
O95563	O95563	2	2	2	Mitochondrial pyruvate carrier 2	MPC2	sp|O95563|MPC2_HUMAN Mitochondrial pyruvate carrier 2 OS=Homo sapiens OX=9606 GN=MPC2 PE=1 SV=1	1	2	2	2	1	1	2	2	1	2	2	2	2	2	2	2	1	2	2	1	1	2	2	2	1	2	2	2	1	2	2	2	2	2	1	2	1	1	2	2	1	1
O95571	O95571	3	3	3	Persulfide dioxygenase ETHE1, mitochondrial	ETHE1	sp|O95571|ETHE1_HUMAN Persulfide dioxygenase ETHE1, mitochondrial OS=Homo sapiens OX=9606 GN=ETHE1 PE=1 SV=2	1	3	3	3	2	2	3	1	1	1	3	1	2	2	1	2	1	1	2	1	1	1	1	2	2	1	2	1	2	1	2	2	2	2	2	1	2	2	2	2	2	2
O95573	O95573	3	3	2	Long-chain-fatty-acid--CoA ligase 3	ACSL3	sp|O95573|ACSL3_HUMAN Long-chain-fatty-acid--CoA ligase 3 OS=Homo sapiens OX=9606 GN=ACSL3 PE=1 SV=3	1	3	3	2	2	2	2	1	1	2	2	1	2	2	1	2	2	2	2	1	2	2	1	1	1	2	2	1	2	2	1	1	2	2	1	2	2	3	2	1	2	2
O95626	O95626	1	1	1	Acidic leucine-rich nuclear phosphoprotein 32 family member D	ANP32D	sp|O95626|AN32D_HUMAN Acidic leucine-rich nuclear phosphoprotein 32 family member D OS=Homo sapiens OX=9606 GN=ANP32D PE=2 SV=2	1	1	1	1	1	1	1	1	1	1	1	1	1	1	1	1	1	1	1	1	1	1	1	1	1	1	1	1	1	1	1	1	1	1	1	1	1	1	1	1	1	1
O95628-7;O95628-5;O95628-3;O95628-2;O95628;O95628-8;O95628-4;O95628-9;O95628-10;O95628-6	O95628-7;O95628-5;O95628-3;O95628-2;O95628;O95628-8;O95628-4;O95628-9;O95628-10;O95628-6	2;1;1;1;1;1;1;1;1;1	2;1;1;1;1;1;1;1;1;1	2;1;1;1;1;1;1;1;1;1	CCR4-NOT transcription complex subunit 4	CNOT4	sp|O95628-7|CNOT4_HUMAN Isoform 7 of CCR4-NOT transcription complex subunit 4 OS=Homo sapiens OX=9606 GN=CNOT4;sp|O95628-5|CNOT4_HUMAN Isoform 5 of CCR4-NOT transcription complex subunit 4 OS=Homo sapiens OX=9606 GN=CNOT4;sp|O95628-3|CNOT4_HUMAN Isoform 3	10	2	2	2	0	0	0	1	0	1	1	0	0	0	0	0	0	0	1	1	0	0	1	1	0	0	0	0	0	0	1	1	0	0	0	1	0	0	0	1	0	0
O95639-3;O95639-2;O95639	O95639-3;O95639-2;O95639	2;2;2	2;2;2	2;2;2	Cleavage and polyadenylation specificity factor subunit 4	CPSF4	sp|O95639-3|CPSF4_HUMAN Isoform 3 of Cleavage and polyadenylation specificity factor subunit 4 OS=Homo sapiens OX=9606 GN=CPSF4;sp|O95639-2|CPSF4_HUMAN Isoform 2 of Cleavage and polyadenylation specificity factor subunit 4 OS=Homo sapiens OX=9606 GN=CPSF4;	3	2	2	2	0	1	1	0	1	0	1	1	1	0	0	0	0	1	0	1	1	1	1	1	1	0	1	0	2	0	1	0	0	1	0	0	1	1	1	1	0	0
Q9TSV6;O95670;O95670-2;O95670-3	Q9TSV6;O95670;O95670-2;O95670-3	4;4;3;2	4;4;3;2	2;2;1;2	V-type proton ATPase subunit G 2	ATP6V1G2	sp|Q9TSV6|VATG2_PIG V-type proton ATPase subunit G 2 OS=Sus scrofa OX=9823 GN=ATP6V1G2 PE=3 SV=1;sp|O95670|VATG2_HUMAN V-type proton ATPase subunit G 2 OS=Homo sapiens OX=9606 GN=ATP6V1G2 PE=1 SV=1;sp|O95670-2|VATG2_HUMAN Isoform 2 of V-type proton ATPase	4	4	4	2	2	3	1	2	2	2	2	3	2	1	1	1	1	2	1	2	2	2	1	3	2	2	0	1	2	2	2	1	3	3	3	3	4	3	2	1	3	4
O95716	O95716	4	1	1	Ras-related protein Rab-3D	RAB3D	sp|O95716|RAB3D_HUMAN Ras-related protein Rab-3D OS=Homo sapiens OX=9606 GN=RAB3D PE=1 SV=1	1	4	1	1	4	1	2	3	3	1	2	3	2	2	3	2	3	3	3	3	2	2	3	3	3	2	2	3	3	3	2	3	2	2	3	3	2	1	3	2	4	0
O95718;O95718-2;O95718-1;P11474-2;P11474	O95718;O95718-2;O95718-1	7;7;7;1;1	7;7;7;1;1	4;4;4;1;1	Steroid hormone receptor ERR2	ESRRB	sp|O95718|ERR2_HUMAN Steroid hormone receptor ERR2 OS=Homo sapiens OX=9606 GN=ESRRB PE=1 SV=3;sp|O95718-2|ERR2_HUMAN Isoform 2 of Steroid hormone receptor ERR2 OS=Homo sapiens OX=9606 GN=ESRRB;sp|O95718-1|ERR2_HUMAN Isoform 1 of Steroid hormone receptor ER	5	7	7	4	2	4	3	1	4	4	2	2	2	3	1	1	5	4	2	1	3	3	1	1	4	5	2	3	4	4	1	2	3	3	3	2	2	3	2	2	3	3
O95741;O95741-2	O95741;O95741-2	5;5	5;5	4;4	Copine-6	CPNE6	sp|O95741|CPNE6_HUMAN Copine-6 OS=Homo sapiens OX=9606 GN=CPNE6 PE=1 SV=3;sp|O95741-2|CPNE6_HUMAN Isoform 2 of Copine-6 OS=Homo sapiens OX=9606 GN=CPNE6	2	5	5	4	5	3	2	1	5	1	1	1	3	2	1	1	5	2	4	2	4	2	1	1	4	2	2	2	5	1	2	1	4	1	3	4	4	4	3	2	5	4
O95757	O95757	19	17	16	Heat shock 70 kDa protein 4L	HSPA4L	sp|O95757|HS74L_HUMAN Heat shock 70 kDa protein 4L OS=Homo sapiens OX=9606 GN=HSPA4L PE=1 SV=3	1	19	17	16	13	12	10	8	12	10	10	10	12	11	10	9	12	11	9	11	12	13	9	12	11	13	9	11	11	9	8	11	12	9	10	10	11	7	11	7	10	10
O95758-1;O95758-6;O95758-2;O95758;O95758-5;O95758-4;O95758-7	O95758-1;O95758-6;O95758-2;O95758;O95758-5;O95758-4;O95758-7	4;4;4;4;4;4;3	3;3;3;3;3;3;3	3;3;3;3;3;3;3	Polypyrimidine tract-binding protein 3	PTBP3	sp|O95758-1|PTBP3_HUMAN Isoform 1 of Polypyrimidine tract-binding protein 3 OS=Homo sapiens OX=9606 GN=PTBP3;sp|O95758-6|PTBP3_HUMAN Isoform 6 of Polypyrimidine tract-binding protein 3 OS=Homo sapiens OX=9606 GN=PTBP3;sp|O95758-2|PTBP3_HUMAN Isoform 2 of P	7	4	3	3	2	1	1	2	2	1	2	1	2	2	2	2	2	2	1	2	2	2	1	1	0	2	2	1	3	1	2	3	1	2	3	2	1	1	2	2	2	1
O95777	O95777	3	3	3	U6 snRNA-associated Sm-like protein LSm8	LSM8	sp|O95777|LSM8_HUMAN U6 snRNA-associated Sm-like protein LSm8 OS=Homo sapiens OX=9606 GN=LSM8 PE=1 SV=3	1	3	3	3	1	1	2	2	1	3	2	1	1	2	1	1	1	3	2	2	2	2	2	2	1	1	2	1	2	1	2	1	1	1	2	2	1	1	2	1	1	2
O95782-2;O95782	O95782-2;O95782	25;25	25;25	19;19	AP-2 complex subunit alpha-1	AP2A1	sp|O95782-2|AP2A1_HUMAN Isoform B of AP-2 complex subunit alpha-1 OS=Homo sapiens OX=9606 GN=AP2A1;sp|O95782|AP2A1_HUMAN AP-2 complex subunit alpha-1 OS=Homo sapiens OX=9606 GN=AP2A1 PE=1 SV=3	2	25	25	19	16	16	13	15	14	14	17	10	14	14	14	14	13	16	11	12	13	12	14	15	16	14	16	16	18	14	16	16	17	14	15	11	15	16	14	14	17	16
O95793-2;O95793-3;O95793	O95793-2;O95793-3;O95793	8;8;8	8;8;8	8;8;8	Double-stranded RNA-binding protein Staufen homolog 1	STAU1	sp|O95793-2|STAU1_HUMAN Isoform Short of Double-stranded RNA-binding protein Staufen homolog 1 OS=Homo sapiens OX=9606 GN=STAU1;sp|O95793-3|STAU1_HUMAN Isoform 3 of Double-stranded RNA-binding protein Staufen homolog 1 OS=Homo sapiens OX=9606 GN=STAU1;sp|O	3	8	8	8	1	1	2	1	0	1	1	2	1	2	0	1	3	2	1	2	2	1	1	2	2	2	1	3	2	0	3	3	1	1	3	3	0	1	1	1	1	1
O95807	O95807	1	1	1	Transmembrane protein 50A	TMEM50A	sp|O95807|TM50A_HUMAN Transmembrane protein 50A OS=Homo sapiens OX=9606 GN=TMEM50A PE=1 SV=1	1	1	1	1	1	0	0	0	1	1	0	1	0	0	0	1	0	1	0	0	0	0	0	1	0	0	0	1	1	1	0	0	0	1	0	0	1	1	0	0	1	1
O95816	O95816	1	1	1	BAG family molecular chaperone regulator 2	BAG2	sp|O95816|BAG2_HUMAN BAG family molecular chaperone regulator 2 OS=Homo sapiens OX=9606 GN=BAG2 PE=1 SV=1	1	1	1	1	0	0	0	0	0	0	0	1	0	0	1	0	0	0	0	1	0	0	0	1	0	0	0	1	0	0	1	1	0	0	1	1	0	1	0	0	0	1
O95817	O95817	1	1	1	BAG family molecular chaperone regulator 3	BAG3	sp|O95817|BAG3_HUMAN BAG family molecular chaperone regulator 3 OS=Homo sapiens OX=9606 GN=BAG3 PE=1 SV=3	1	1	1	1	0	0	0	0	0	0	0	0	0	0	0	0	0	0	0	0	0	0	0	0	0	0	0	0	0	0	0	0	0	0	0	0	0	0	0	0	0	0
O95831-3;O95831;O95831-2;O95831-6;O95831-4;O95831-5	O95831-3;O95831;O95831-2	11;11;6;5;5;4	11;11;6;5;5;4	11;11;6;5;5;4	Apoptosis-inducing factor 1, mitochondrial	AIFM1	sp|O95831-3|AIFM1_HUMAN Isoform 3 of Apoptosis-inducing factor 1, mitochondrial OS=Homo sapiens OX=9606 GN=AIFM1;sp|O95831|AIFM1_HUMAN Apoptosis-inducing factor 1, mitochondrial OS=Homo sapiens OX=9606 GN=AIFM1 PE=1 SV=1;sp|O95831-2|AIFM1_HUMAN Isoform 2 o	6	11	11	11	8	8	7	8	7	9	7	5	8	7	6	9	8	9	7	7	9	7	7	8	8	8	6	7	8	8	7	8	9	8	8	10	10	9	8	8	9	9
O95834;O95834-2;O95834-3	O95834;O95834-2;O95834-3	3;3;3	3;3;3	3;3;3	Echinoderm microtubule-associated protein-like 2	EML2	sp|O95834|EMAL2_HUMAN Echinoderm microtubule-associated protein-like 2 OS=Homo sapiens OX=9606 GN=EML2 PE=1 SV=1;sp|O95834-2|EMAL2_HUMAN Isoform 2 of Echinoderm microtubule-associated protein-like 2 OS=Homo sapiens OX=9606 GN=EML2;sp|O95834-3|EMAL2_HUMAN I	3	3	3	3	1	2	1	1	2	1	2	2	2	1	2	3	1	2	1	1	2	1	2	1	1	1	2	2	1	2	1	2	1	3	2	3	2	1	1	1	2	1
O95847-2;O95847	O95847-2;O95847	2;2	2;2	2;2	Mitochondrial uncoupling protein 4	SLC25A27	sp|O95847-2|UCP4_HUMAN Isoform 2 of Mitochondrial uncoupling protein 4 OS=Homo sapiens OX=9606 GN=SLC25A27;sp|O95847|UCP4_HUMAN Mitochondrial uncoupling protein 4 OS=Homo sapiens OX=9606 GN=SLC25A27 PE=2 SV=1	2	2	2	2	0	0	1	0	1	0	0	0	0	0	0	0	1	0	0	0	0	1	0	0	1	0	0	0	1	1	0	0	1	1	0	0	0	1	0	0	0	1
O95861;O95861-2;O95861-3;O95861-4	O95861;O95861-2;O95861-3;O95861-4	5;5;4;4	5;5;4;4	5;5;4;4	3(2),5-bisphosphate nucleotidase 1	BPNT1	sp|O95861|BPNT1_HUMAN 3(2),5-bisphosphate nucleotidase 1 OS=Homo sapiens OX=9606 GN=BPNT1 PE=1 SV=1;sp|O95861-2|BPNT1_HUMAN Isoform 2 of 3(2),5-bisphosphate nucleotidase 1 OS=Homo sapiens OX=9606 GN=BPNT1;sp|O95861-3|BPNT1_HUMAN Isoform 3 of 3(2),5	4	5	5	5	1	2	1	2	0	2	1	1	1	1	1	0	0	1	0	2	0	0	1	2	0	0	1	2	2	1	2	2	1	2	3	2	0	2	1	1	0	1
O95865	O95865	7	7	6	N(G),N(G)-dimethylarginine dimethylaminohydrolase 2	DDAH2	sp|O95865|DDAH2_HUMAN N(G),N(G)-dimethylarginine dimethylaminohydrolase 2 OS=Homo sapiens OX=9606 GN=DDAH2 PE=1 SV=1	1	7	7	6	3	3	4	3	2	4	3	3	2	3	4	2	2	4	2	2	2	4	4	2	2	4	2	2	3	3	2	4	4	3	4	4	3	3	4	3	4	3
O95870-2;O95870	O95870-2;O95870	6;5	6;5	6;5	Abhydrolase domain-containing protein 16A	ABHD16A	sp|O95870-2|ABHGA_HUMAN Isoform 2 of Phosphatidylserine lipase ABHD16A OS=Homo sapiens OX=9606 GN=ABHD16A;sp|O95870|ABHGA_HUMAN Phosphatidylserine lipase ABHD16A OS=Homo sapiens OX=9606 GN=ABHD16A PE=1 SV=3	2	6	6	6	2	2	2	3	2	3	2	2	2	2	1	1	2	2	2	2	2	2	2	1	2	2	2	1	4	2	2	2	3	2	2	2	2	2	2	1	2	3
O95931	O95931	1	1	1	Chromobox protein homolog 7	CBX7	sp|O95931|CBX7_HUMAN Chromobox protein homolog 7 OS=Homo sapiens OX=9606 GN=CBX7 PE=1 SV=1	1	1	1	1	0	0	0	0	0	0	0	0	0	0	0	0	0	0	0	0	0	0	0	0	0	0	0	0	0	0	0	0	0	0	0	0	0	0	0	0	0	0
O95970-2;O95970-3;O95970	O95970-2;O95970-3;O95970	1;1;1	1;1;1	1;1;1	Leucine-rich glioma-inactivated protein 1	LGI1	sp|O95970-2|LGI1_HUMAN Isoform 2 of Leucine-rich glioma-inactivated protein 1 OS=Homo sapiens OX=9606 GN=LGI1;sp|O95970-3|LGI1_HUMAN Isoform 3 of Leucine-rich glioma-inactivated protein 1 OS=Homo sapiens OX=9606 GN=LGI1;sp|O95970|LGI1_HUMAN Leucine-rich gl	3	1	1	1	0	0	0	0	0	0	0	0	0	0	0	0	0	1	0	0	0	0	0	0	0	0	0	0	0	0	0	0	0	0	0	0	0	0	0	0	0	0
O95980	O95980	1	1	1	Reversion-inducing cysteine-rich protein with Kazal motifs	RECK	sp|O95980|RECK_HUMAN Reversion-inducing cysteine-rich protein with Kazal motifs OS=Homo sapiens OX=9606 GN=RECK PE=1 SV=1	1	1	1	1	0	0	0	0	0	0	1	1	0	1	0	0	0	0	0	0	0	0	0	0	0	0	1	1	1	0	1	1	0	0	1	1	0	0	1	0	1	0
O95983-2;O95983	O95983-2;O95983	1;1	1;1	1;1	Methyl-CpG-binding domain protein 3	MBD3	sp|O95983-2|MBD3_HUMAN Isoform 2 of Methyl-CpG-binding domain protein 3 OS=Homo sapiens OX=9606 GN=MBD3;sp|O95983|MBD3_HUMAN Methyl-CpG-binding domain protein 3 OS=Homo sapiens OX=9606 GN=MBD3 PE=1 SV=1	2	1	1	1	0	1	0	0	0	0	1	0	0	0	0	0	0	0	1	0	0	0	0	0	0	0	0	0	0	1	0	0	0	0	0	1	0	0	0	0	0	0
O95989	O95989	1	1	1	Diphosphoinositol polyphosphate phosphohydrolase 1	NUDT3	sp|O95989|NUDT3_HUMAN Diphosphoinositol polyphosphate phosphohydrolase 1 OS=Homo sapiens OX=9606 GN=NUDT3 PE=1 SV=1	1	1	1	1	0	1	0	0	0	0	0	1	0	0	0	0	1	0	1	0	1	0	1	0	1	0	0	0	0	0	0	1	1	0	1	0	0	1	1	0	1	1
O96000-2;O96000	O96000-2;O96000	1;1	1;1	1;1	NADH dehydrogenase [ubiquinone] 1 beta subcomplex subunit 10	NDUFB10	sp|O96000-2|NDUBA_HUMAN Isoform 2 of NADH dehydrogenase [ubiquinone] 1 beta subcomplex subunit 10 OS=Homo sapiens OX=9606 GN=NDUFB10;sp|O96000|NDUBA_HUMAN NADH dehydrogenase [ubiquinone] 1 beta subcomplex subunit 10 OS=Homo sapiens OX=9606 GN=NDUFB10 PE=1	2	1	1	1	0	0	1	1	0	0	1	1	0	0	1	1	0	0	1	1	0	0	0	1	0	0	1	1	0	0	1	1	0	0	1	1	0	0	1	1	0	0
O96005-3;O96005-4;O96005	O96005-3;O96005-4;O96005	4;4;4	4;4;4	4;4;4	Cleft lip and palate transmembrane protein 1	CLPTM1	sp|O96005-3|CLPT1_HUMAN Isoform 2 of Cleft lip and palate transmembrane protein 1 OS=Homo sapiens OX=9606 GN=CLPTM1;sp|O96005-4|CLPT1_HUMAN Isoform 3 of Cleft lip and palate transmembrane protein 1 OS=Homo sapiens OX=9606 GN=CLPTM1;sp|O96005|CLPT1_HUMAN Cl	3	4	4	4	2	2	2	2	2	1	1	1	3	1	1	3	2	3	1	2	2	3	3	3	2	2	1	2	2	2	1	1	3	3	2	2	2	3	1	2	2	3
O96008;O96008-2	O96008;O96008-2	7;4	7;4	7;4	Mitochondrial import receptor subunit TOM40 homolog	TOMM40	sp|O96008|TOM40_HUMAN Mitochondrial import receptor subunit TOM40 homolog OS=Homo sapiens OX=9606 GN=TOMM40 PE=1 SV=1;sp|O96008-2|TOM40_HUMAN Isoform 2 of Mitochondrial import receptor subunit TOM40 homolog OS=Homo sapiens OX=9606 GN=TOMM40	2	7	7	7	4	2	2	1	2	2	1	2	5	2	1	2	4	3	2	2	5	2	2	2	3	2	0	2	2	3	2	2	3	2	3	3	3	1	3	1	2	1
O96019;O96019-2	O96019;O96019-2	7;5	7;5	6;4	Actin-like protein 6A	ACTL6A	sp|O96019|ACL6A_HUMAN Actin-like protein 6A OS=Homo sapiens OX=9606 GN=ACTL6A PE=1 SV=1;sp|O96019-2|ACL6A_HUMAN Isoform 2 of Actin-like protein 6A OS=Homo sapiens OX=9606 GN=ACTL6A	2	7	7	6	3	5	6	4	4	6	5	2	5	4	3	4	4	3	4	4	5	6	2	5	5	5	5	6	3	5	4	5	6	4	4	6	4	3	5	4	4	3
O97507	O97507	1	1	1			sp|O97507|FA12_PIG Coagulation factor XII OS=Sus scrofa OX=9823 GN=F12 PE=2 SV=1	1	1	1	1	0	0	0	0	0	0	0	0	0	0	0	0	0	0	0	0	0	0	0	0	0	0	0	0	0	0	0	0	1	0	0	0	0	0	0	0	0	0
O97580	O97580	14	14	6			sp|O97580|SUCB1_PIG Succinate--CoA ligase [ADP-forming] subunit beta, mitochondrial (Fragment) OS=Sus scrofa OX=9823 GN=SUCLA2 PE=2 SV=1	1	14	14	6	10	8	9	10	7	7	8	7	7	8	9	9	8	9	9	8	8	9	8	9	8	7	9	8	10	9	9	8	9	8	8	10	10	9	7	8	10	8
O97676	O97676	1	1	1			sp|O97676|SRBP1_PIG Sterol regulatory element-binding protein 1 OS=Sus scrofa OX=9823 GN=SREBF1 PE=2 SV=2	1	1	1	1	0	0	0	0	0	0	0	0	0	0	0	0	0	0	0	0	0	0	0	0	0	0	0	0	0	0	0	0	0	0	0	0	0	0	0	0	0	0
P00172-2;P00172;P00167-2;P00167-3;P00167	P00172-2;P00172;P00167-2;P00167-3;P00167	5;5;5;5;5	5;5;5;5;5	5;5;5;5;5	Cytochrome b5	CYB5A	sp|P00172-2|CYB5_PIG Isoform 2 of Cytochrome b5 OS=Sus scrofa OX=9823 GN=CYB5A;sp|P00172|CYB5_PIG Cytochrome b5 OS=Sus scrofa OX=9823 GN=CYB5A PE=1 SV=3;sp|P00167-2|CYB5_HUMAN Isoform 2 of Cytochrome b5 OS=Homo sapiens OX=9606 GN=CYB5A;sp|P00167-3|CYB5_HUM	5	5	5	5	1	1	1	1	0	0	1	1	0	2	1	1	0	2	1	2	1	1	2	2	1	1	2	3	1	3	1	2	2	2	3	2	1	2	0	2	1	3
P00336;P07195	P00336;P07195	17;11	16;10	16;10	L-lactate dehydrogenase B chain	LDHB	sp|P00336|LDHB_PIG L-lactate dehydrogenase B chain OS=Sus scrofa OX=9823 GN=LDHB PE=1 SV=3;sp|P07195|LDHB_HUMAN L-lactate dehydrogenase B chain OS=Homo sapiens OX=9606 GN=LDHB PE=1 SV=2	2	17	16	16	13	14	12	13	12	14	14	13	13	13	13	13	12	14	14	14	11	14	12	13	13	13	13	14	14	14	13	14	14	13	15	15	12	13	13	13	13	13
P00339;P00338-4;P00338;P00338-3;P00338-5;P00338-2;Q9TSX5;Q6ZMR3;P07864	P00339	21;6;6;6;4;4;1;1;1	21;6;6;6;4;4;1;1;1	20;5;5;5;3;3;0;0;0			sp|P00339|LDHA_PIG L-lactate dehydrogenase A chain OS=Sus scrofa OX=9823 GN=LDHA PE=1 SV=3	9	21	21	20	15	13	15	15	15	16	15	16	14	16	17	14	13	14	15	16	15	14	15	13	15	17	17	13	14	13	14	18	17	18	18	19	18	18	17	16	17	17
P00346;P40926;P40926-2	P00346;P40926	19;11;9	19;11;9	19;11;9	Malate dehydrogenase, mitochondrial	MDH2	sp|P00346|MDHM_PIG Malate dehydrogenase, mitochondrial OS=Sus scrofa OX=9823 GN=MDH2 PE=1 SV=2;sp|P40926|MDHM_HUMAN Malate dehydrogenase, mitochondrial OS=Homo sapiens OX=9606 GN=MDH2 PE=1 SV=3	3	19	19	19	14	13	14	15	14	15	14	15	12	13	14	15	12	14	13	14	11	15	16	15	13	14	14	15	14	15	14	14	16	14	14	15	14	15	13	14	15	16
P00348	P00348	5	5	5			sp|P00348|HCDH_PIG Hydroxyacyl-coenzyme A dehydrogenase, mitochondrial OS=Sus scrofa OX=9823 GN=HADH PE=1 SV=2	1	5	5	5	0	2	1	2	1	1	1	0	2	3	1	2	1	2	2	0	1	1	0	2	1	1	1	1	2	0	0	1	2	1	0	2	1	1	2	2	1	1
P00352	P00352	6	6	6	Retinal dehydrogenase 1	ALDH1A1	sp|P00352|AL1A1_HUMAN Retinal dehydrogenase 1 OS=Homo sapiens OX=9606 GN=ALDH1A1 PE=1 SV=2	1	6	6	6	1	3	3	1	2	2	1	3	2	1	2	2	2	2	1	2	1	2	2	2	1	1	1	2	1	2	1	2	3	3	3	2	1	4	2	1	1	4
P00355	P00355	18	18	11			sp|P00355|G3P_PIG Glyceraldehyde-3-phosphate dehydrogenase OS=Sus scrofa OX=9823 GN=GAPDH PE=1 SV=4	1	18	18	11	13	13	13	13	13	13	13	14	13	13	13	13	13	13	13	14	13	14	13	15	14	14	13	14	13	13	13	14	15	15	15	14	16	14	14	14	16	15
P00377;P00374	P00377	4;1	4;1	4;1			sp|P00377|DYR_PIG Dihydrofolate reductase OS=Sus scrofa OX=9823 GN=DHFR PE=1 SV=1	2	4	4	4	0	2	1	0	1	1	1	0	2	0	0	0	1	2	0	2	1	1	0	1	1	1	0	1	1	2	0	2	1	1	1	2	2	1	1	0	2	1
P00387-2;P00387;P00387-3	P00387-2;P00387;P00387-3	5;5;5	1;1;1	1;1;1	NADH-cytochrome b5 reductase 3;NADH-cytochrome b5 reductase 3 membrane-bound form;NADH-cytochrome b5 reductase 3 soluble form	CYB5R3	sp|P00387-2|NB5R3_HUMAN Isoform 2 of NADH-cytochrome b5 reductase 3 OS=Homo sapiens OX=9606 GN=CYB5R3;sp|P00387|NB5R3_HUMAN NADH-cytochrome b5 reductase 3 OS=Homo sapiens OX=9606 GN=CYB5R3 PE=1 SV=3;sp|P00387-3|NB5R3_HUMAN Isoform 3 of NADH-cytochrome b5 r	3	5	1	1	5	5	4	2	5	3	3	4	4	5	3	4	4	3	4	3	4	4	4	4	5	3	3	5	4	4	5	5	5	3	5	5	5	4	4	2	5	5
P00390-5;P00390-4;P00390-2;P00390-3;P00390	P00390-5;P00390-4;P00390-2;P00390-3;P00390	3;3;3;3;3	3;3;3;3;3	3;3;3;3;3	Glutathione reductase, mitochondrial	GSR	sp|P00390-5|GSHR_HUMAN Isoform 4 of Glutathione reductase, mitochondrial OS=Homo sapiens OX=9606 GN=GSR;sp|P00390-4|GSHR_HUMAN Isoform 3 of Glutathione reductase, mitochondrial OS=Homo sapiens OX=9606 GN=GSR;sp|P00390-2|GSHR_HUMAN Isoform Cytoplasmic of Gl	5	3	3	3	1	1	1	1	1	1	1	1	1	1	1	1	1	1	1	1	1	1	1	1	1	1	2	1	1	1	1	1	1	1	1	2	0	1	1	2	1	1
P00450;CON__ENSEMBL:ENSBTAP00000031900	P00450	7;3	7;3	7;3	Ceruloplasmin	CP	sp|P00450|CERU_HUMAN Ceruloplasmin OS=Homo sapiens OX=9606 GN=CP PE=1 SV=1	2	7	7	7	2	2	1	1	2	1	2	2	0	1	0	1	1	0	1	1	0	1	2	1	1	0	1	1	0	2	1	1	1	1	3	1	2	2	1	3	2	1
P00491	P00491	5	5	5	Purine nucleoside phosphorylase	PNP	sp|P00491|PNPH_HUMAN Purine nucleoside phosphorylase OS=Homo sapiens OX=9606 GN=PNP PE=1 SV=2	1	5	5	5	4	4	4	5	4	5	4	4	5	4	4	4	4	4	4	3	3	5	4	4	3	5	5	4	4	5	5	5	4	4	5	5	4	3	4	4	4	3
P00503;P17174;P17174-2	P00503	19;7;5	19;7;5	19;7;5			sp|P00503|AATC_PIG Aspartate aminotransferase, cytoplasmic OS=Sus scrofa OX=9823 GN=GOT1 PE=1 SV=3	3	19	19	19	14	15	12	13	16	13	12	14	14	13	13	15	15	16	12	12	13	12	13	14	15	15	12	14	17	13	14	15	16	11	15	17	13	16	14	14	15	16
P00506;P00505;P00505-2	P00506	30;11;8	30;11;8	30;11;8			sp|P00506|AATM_PIG Aspartate aminotransferase, mitochondrial OS=Sus scrofa OX=9823 GN=GOT2 PE=1 SV=2	3	30	30	30	16	18	19	20	16	21	19	17	19	18	17	18	17	20	18	19	18	18	18	19	16	18	19	19	20	20	20	23	23	23	24	25	21	20	20	19	23	26
P00558;P00558-2;Q6RI85;P07205	P00558;P00558-2	19;18;7;5	2;2;1;1	2;2;1;1	Phosphoglycerate kinase 1	PGK1	sp|P00558|PGK1_HUMAN Phosphoglycerate kinase 1 OS=Homo sapiens OX=9606 GN=PGK1 PE=1 SV=3;sp|P00558-2|PGK1_HUMAN Isoform 2 of Phosphoglycerate kinase 1 OS=Homo sapiens OX=9606 GN=PGK1	4	19	2	2	7	11	11	11	12	9	11	11	11	11	11	10	10	12	11	11	8	10	11	11	11	11	11	12	11	11	11	10	12	12	11	12	9	11	12	13	13	14
P00571;P00568;Q9Y6K8-2	P00571;P00568	10;5;1	10;5;1	9;4;0	Adenylate kinase isoenzyme 1	AK1	sp|P00571|KAD1_PIG Adenylate kinase isoenzyme 1 OS=Sus scrofa OX=9823 GN=AK1 PE=1 SV=1;sp|P00568|KAD1_HUMAN Adenylate kinase isoenzyme 1 OS=Homo sapiens OX=9606 GN=AK1 PE=1 SV=3	3	10	10	9	4	4	4	4	5	4	5	5	4	5	6	6	6	3	5	5	3	4	6	5	6	5	5	4	5	6	5	5	5	4	4	5	4	4	4	5	5	5
P00636;P09467	P00636;P09467	2;1	2;1	2;1	Fructose-1,6-bisphosphatase 1	FBP1	sp|P00636|F16P1_PIG Fructose-1,6-bisphosphatase 1 OS=Sus scrofa OX=9823 GN=FBP1 PE=1 SV=4;sp|P09467|F16P1_HUMAN Fructose-1,6-bisphosphatase 1 OS=Homo sapiens OX=9606 GN=FBP1 PE=1 SV=5	2	2	2	2	0	1	0	0	0	0	0	1	0	1	0	0	0	0	0	0	0	0	0	1	0	0	1	0	0	0	1	1	0	0	0	0	0	0	0	0	0	0
P00795;P07339	P00795	11;4	11;4	11;4			sp|P00795|CATD_PIG Cathepsin D OS=Sus scrofa OX=9823 GN=CTSD PE=1 SV=2	2	11	11	11	6	7	7	7	6	7	7	7	6	7	7	7	7	8	7	7	7	7	7	6	6	6	8	7	7	7	7	7	8	10	10	9	8	7	7	9	8	7
P00889	P00889	12	12	4			sp|P00889|CISY_PIG Citrate synthase, mitochondrial OS=Sus scrofa OX=9823 GN=CS PE=1 SV=2	1	12	12	4	7	5	8	10	9	6	7	8	7	8	6	9	8	7	7	7	7	7	8	8	8	8	7	8	9	7	8	8	9	6	8	9	7	6	7	8	8	6
P00915	P00915	3	3	3	Carbonic anhydrase 1	CA1	sp|P00915|CAH1_HUMAN Carbonic anhydrase 1 OS=Homo sapiens OX=9606 GN=CA1 PE=1 SV=2	1	3	3	3	1	1	1	1	0	1	0	0	0	1	1	1	0	0	0	0	1	1	1	1	0	0	1	0	1	1	1	1	2	1	1	1	1	1	1	0	0	0
P00918	P00918	3	3	3	Carbonic anhydrase 2	CA2	sp|P00918|CAH2_HUMAN Carbonic anhydrase 2 OS=Homo sapiens OX=9606 GN=CA2 PE=1 SV=2	1	3	3	3	3	2	3	2	3	2	3	3	3	2	2	2	3	3	2	3	3	3	2	3	3	3	3	3	2	3	2	2	3	2	2	3	3	2	2	2	3	2
P01008	P01008	1	1	1	Antithrombin-III	SERPINC1	sp|P01008|ANT3_HUMAN Antithrombin-III OS=Homo sapiens OX=9606 GN=SERPINC1 PE=1 SV=1	1	1	1	1	1	1	1	0	1	1	0	1	0	0	1	1	1	0	0	0	0	1	0	0	0	0	0	0	0	1	0	0	0	0	1	1	1	1	0	0	1	0
P01023	P01023	4	4	1	Alpha-2-macroglobulin	A2M	sp|P01023|A2MG_HUMAN Alpha-2-macroglobulin OS=Homo sapiens OX=9606 GN=A2M PE=1 SV=3	1	4	4	1	1	2	1	1	2	2	2	2	1	1	0	0	1	0	0	0	1	1	0	0	1	1	0	0	1	0	0	0	1	1	1	2	1	1	0	1	1	1
P01025;CON__Q2UVX4	P01025	35;6	35;6	33;4			sp|P01025|CO3_PIG Complement C3 OS=Sus scrofa OX=9823 GN=C3 PE=1 SV=2	2	35	35	33	12	14	11	10	18	18	19	20	5	7	3	6	12	11	11	10	8	8	4	9	3	3	5	6	6	2	7	8	12	6	16	16	15	17	18	16	12	12
P01031	P01031	1	1	1	Complement C5;Complement C5 beta chain;Complement C5 alpha chain;C5a anaphylatoxin;Complement C5 alpha chain	C5	sp|P01031|CO5_HUMAN Complement C5 OS=Homo sapiens OX=9606 GN=C5 PE=1 SV=4	1	1	1	1	0	0	0	0	0	0	0	0	0	0	0	0	0	0	0	0	0	0	0	0	0	0	0	0	0	0	0	0	0	0	0	0	0	0	0	0	0	0
P01040	P01040	2	2	2	Cystatin-A;Cystatin-A, N-terminally processed	CSTA	sp|P01040|CYTA_HUMAN Cystatin-A OS=Homo sapiens OX=9606 GN=CSTA PE=1 SV=1	1	2	2	2	2	1	1	0	0	1	0	0	0	0	0	0	0	0	0	0	0	0	0	0	0	0	0	0	0	0	0	0	0	0	0	0	0	0	0	0	0	0
P01112;P01112-2	P01112;P01112-2	5;4	1;0	0;0	GTPase HRas;GTPase HRas, N-terminally processed	HRAS	sp|P01112|RASH_HUMAN GTPase HRas OS=Homo sapiens OX=9606 GN=HRAS PE=1 SV=1;sp|P01112-2|RASH_HUMAN Isoform 2 of GTPase HRas OS=Homo sapiens OX=9606 GN=HRAS	2	5	1	0	2	2	2	3	2	2	2	4	3	4	2	1	2	3	3	2	2	2	4	4	2	2	3	3	3	2	3	3	3	3	4	3	2	2	3	2	1	2
P01116-2;P01116	P01116-2;P01116	6;5	6;5	1;0	GTPase KRas;GTPase KRas, N-terminally processed	KRAS	sp|P01116-2|RASK_HUMAN Isoform 2B of GTPase KRas OS=Homo sapiens OX=9606 GN=KRAS;sp|P01116|RASK_HUMAN GTPase KRas OS=Homo sapiens OX=9606 GN=KRAS PE=1 SV=1	2	6	6	1	3	4	3	2	2	4	1	5	3	5	2	3	3	4	3	3	3	3	4	4	3	3	3	3	3	3	3	3	5	4	4	4	3	4	4	2	2	3
P01599	P01599	1	1	1	Ig kappa chain V-I region Gal		sp|P01599|KV117_HUMAN Immunoglobulin kappa variable 1-17 OS=Homo sapiens OX=9606 GN=IGKV1-17 PE=1 SV=2	1	1	1	1	0	0	0	0	0	1	0	0	0	0	0	0	0	0	0	0	0	0	0	0	0	0	0	0	0	0	0	1	0	0	0	0	0	0	0	0	0	0
P01846	P01846	5	5	5			sp|P01846|LAC_PIG Ig lambda chain C region OS=Sus scrofa OX=9823 PE=1 SV=1	1	5	5	5	3	4	4	3	4	4	4	3	3	3	3	3	3	3	4	3	3	3	3	3	3	2	3	3	3	3	4	3	3	3	4	3	3	3	4	3	4	3
P0DOX6;P01871;P01871-2	P0DOX6;P01871;P01871-2	1;1;1	1;1;1	1;1;1	Ig mu chain C region	IGHM	sp|P0DOX6|IGM_HUMAN Immunoglobulin mu heavy chain OS=Homo sapiens OX=9606 PE=1 SV=2;sp|P01871|IGHM_HUMAN Immunoglobulin heavy constant mu OS=Homo sapiens OX=9606 GN=IGHM PE=1 SV=4;sp|P01871-2|IGHM_HUMAN Isoform 2 of Immunoglobulin heavy constant mu OS=Homo	3	1	1	1	1	1	1	1	1	1	1	1	1	1	1	0	1	1	1	1	1	1	1	1	1	1	1	0	1	1	1	1	1	1	0	1	1	0	1	0	1	1
P01889	P01889	1	1	1	HLA class I histocompatibility antigen, B-7 alpha chain	HLA-B	sp|P01889|HLAB_HUMAN HLA class I histocompatibility antigen, B alpha chain OS=Homo sapiens OX=9606 GN=HLA-B PE=1 SV=3	1	1	1	1	0	0	0	0	0	0	0	0	0	0	0	0	0	0	0	0	0	0	0	0	0	0	0	0	0	1	1	1	0	1	1	1	0	0	0	0	0	0
P01965;CON__P01966;P69905;P02009;P02008	P01965	10;3;2;1;1	10;3;2;1;1	10;3;2;1;1			sp|P01965|HBA_PIG Hemoglobin subunit alpha OS=Sus scrofa OX=9823 GN=HBA PE=1 SV=1	5	10	10	10	6	6	6	6	6	6	6	6	6	6	7	5	6	6	6	6	6	6	6	6	6	6	6	5	6	6	5	6	6	6	6	7	6	6	6	5	6	6
P02042	P02042	3	1	1	Hemoglobin subunit delta	HBD	sp|P02042|HBD_HUMAN Hemoglobin subunit delta OS=Homo sapiens OX=9606 GN=HBD PE=1 SV=2	1	3	1	1	2	2	3	2	2	2	3	2	2	2	2	2	2	2	2	2	2	3	2	3	2	2	2	3	2	2	2	2	2	2	3	2	2	2	2	2	2	2
P02067;P68871;P04246;P02101;P69892;P69891;P02100	P02067	13;3;1;1;1;1;1	13;3;1;1;1;1;1	11;1;0;0;0;0;0			sp|P02067|HBB_PIG Hemoglobin subunit beta OS=Sus scrofa OX=9823 GN=HBB PE=1 SV=3	7	13	13	11	9	9	9	8	8	8	9	8	9	9	9	8	8	9	9	9	8	9	9	9	9	8	9	9	9	9	9	10	10	10	10	10	10	10	9	10	10	9
P02458-3	P02458-3	3	3	1	Collagen alpha-1(II) chain;Collagen alpha-1(II) chain;Chondrocalcin	COL2A1	sp|P02458-3|CO2A1_HUMAN Isoform 3 of Collagen alpha-1(II) chain OS=Homo sapiens OX=9606 GN=COL2A1	1	3	3	1	0	0	0	1	0	0	0	0	0	0	0	0	0	0	0	0	0	0	0	0	0	0	0	0	0	0	0	0	0	0	0	0	0	0	1	0	0	0
P02475;A0A140G945-2;A0A140G945;P02489	P02475	7;2;2;2	7;2;2;2	7;2;2;2			sp|P02475|CRYAA_PIG Alpha-crystallin A chain OS=Sus scrofa OX=9823 GN=CRYAA PE=1 SV=1	4	7	7	7	0	0	0	0	1	1	2	2	0	0	0	0	0	1	0	0	0	0	0	0	0	0	0	0	1	0	0	0	1	0	0	0	0	1	0	0	1	0
P02540;P17661	P02540;P17661	8;8	3;3	3;3	Desmin	DES	sp|P02540|DESM_PIG Desmin OS=Sus scrofa OX=9823 GN=DES PE=1 SV=4;sp|P17661|DESM_HUMAN Desmin OS=Homo sapiens OX=9606 GN=DES PE=1 SV=3	2	8	3	3	2	1	1	4	2	2	1	3	2	0	3	3	2	2	3	3	2	2	3	3	2	1	1	3	2	2	2	2	2	2	3	3	2	3	3	3	3	4
P02543;P08670	P02543;P08670	42;30	42;30	34;22	Vimentin	VIM	sp|P02543|VIME_PIG Vimentin OS=Sus scrofa OX=9823 GN=VIM PE=1 SV=2;sp|P08670|VIME_HUMAN Vimentin OS=Homo sapiens OX=9606 GN=VIM PE=1 SV=4	2	42	42	34	26	27	26	31	28	28	26	25	26	26	27	29	27	27	29	28	28	26	28	30	27	26	27	30	26	27	29	27	31	29	31	35	29	34	30	30	31	35
P02547	P02547	23	22	6			sp|P02547|NFL_PIG Neurofilament light polypeptide OS=Sus scrofa OX=9823 GN=NEFL PE=1 SV=3	1	23	22	6	14	12	13	15	12	14	13	17	12	13	13	13	9	13	12	14	12	14	14	14	13	12	13	14	14	13	12	13	15	16	16	16	13	14	13	14	15	15
P02549-2;P02549	P02549-2;P02549	5;5	5;5	5;5	Spectrin alpha chain, erythrocytic 1	SPTA1	sp|P02549-2|SPTA1_HUMAN Isoform 2 of Spectrin alpha chain, erythrocytic 1 OS=Homo sapiens OX=9606 GN=SPTA1;sp|P02549|SPTA1_HUMAN Spectrin alpha chain, erythrocytic 1 OS=Homo sapiens OX=9606 GN=SPTA1 PE=1 SV=5	2	5	5	5	0	0	0	0	0	0	0	0	0	1	0	0	1	0	0	0	0	0	0	0	0	0	0	0	0	0	0	0	0	0	0	0	0	0	0	0	0	0
P02550	P02550	26	1	1			sp|P02550|TBA1A_PIG Tubulin alpha-1A chain OS=Sus scrofa OX=9823 GN=TUBA1A PE=1 SV=1	1	26	1	1	20	21	19	19	21	20	20	21	21	20	20	20	21	20	18	20	20	21	20	19	19	20	18	19	21	21	20	20	23	22	22	23	23	23	21	21	24	24
P02554;A6NNZ2	P02554	28;7	28;7	0;0			sp|P02554|TBB_PIG Tubulin beta chain OS=Sus scrofa OX=9823 PE=1 SV=1	2	28	28	0	20	22	21	21	23	26	22	22	20	20	20	20	21	23	22	23	21	23	22	22	22	22	22	21	23	21	21	22	25	25	24	25	24	24	26	25	24	27
P02671;P02671-2;CON__P02672	P02671;P02671-2;CON__P02672	2;2;1	2;2;1	2;2;1	Fibrinogen alpha chain;Fibrinopeptide A;Fibrinogen alpha chain	FGA	sp|P02671|FIBA_HUMAN Fibrinogen alpha chain OS=Homo sapiens OX=9606 GN=FGA PE=1 SV=2;sp|P02671-2|FIBA_HUMAN Isoform 2 of Fibrinogen alpha chain OS=Homo sapiens OX=9606 GN=FGA;	3	2	2	2	1	1	1	1	2	1	1	1	1	1	1	1	1	1	1	1	1	1	1	1	1	1	1	1	1	1	1	1	1	1	1	1	1	1	1	1	2	1
P02675	P02675	3	2	2	Fibrinogen beta chain;Fibrinopeptide B;Fibrinogen beta chain	FGB	sp|P02675|FIBB_HUMAN Fibrinogen beta chain OS=Homo sapiens OX=9606 GN=FGB PE=1 SV=2	1	3	2	2	2	2	2	2	2	2	2	2	2	2	2	2	1	2	1	2	1	2	2	2	1	1	1	1	1	1	2	2	2	2	2	2	1	2	2	2	1	2
P02679-2;P02679	P02679-2;P02679	2;2	2;2	2;2	Fibrinogen gamma chain	FGG	sp|P02679-2|FIBG_HUMAN Isoform Gamma-A of Fibrinogen gamma chain OS=Homo sapiens OX=9606 GN=FGG;sp|P02679|FIBG_HUMAN Fibrinogen gamma chain OS=Homo sapiens OX=9606 GN=FGG PE=1 SV=3	2	2	2	2	1	1	2	1	1	1	1	1	1	1	1	1	1	1	1	1	1	1	1	1	1	1	1	0	1	1	1	1	1	1	1	1	1	1	1	1	1	1
P02749	P02749	2	2	2	Beta-2-glycoprotein 1	APOH	sp|P02749|APOH_HUMAN Beta-2-glycoprotein 1 OS=Homo sapiens OX=9606 GN=APOH PE=1 SV=3	1	2	2	2	0	0	0	0	0	2	1	1	0	0	0	0	0	0	0	0	0	0	0	0	0	0	0	0	0	0	0	0	0	0	0	1	0	0	0	1	0	0
P02751-1;P02751-6;P02751-5;P02751-3;P02751-17;P02751;P02751-8;P02751-7;P02751-11;P02751-14;P02751-9;P02751-10;P02751-4;P02751-13;P02751-12;P02751-16;P02751-2	P02751-1;P02751-6;P02751-5;P02751-3;P02751-17;P02751;P02751-8;P02751-7;P02751-11;P02751-14;P02751-9;P02751-10;P02751-4;P02751-13;P02751-12	18;18;18;18;18;17;17;17;17;17;17;17;17;16;15;5;4	18;18;18;18;18;17;17;17;17;17;17;17;17;16;15;5;4	18;18;18;18;18;17;17;17;17;17;17;17;17;16;15;5;4	Fibronectin;Anastellin;Ugl-Y1;Ugl-Y2;Ugl-Y3	FN1	sp|P02751-1|FINC_HUMAN Isoform 1 of Fibronectin OS=Homo sapiens OX=9606 GN=FN1;sp|P02751-6|FINC_HUMAN Isoform 6 of Fibronectin OS=Homo sapiens OX=9606 GN=FN1;sp|P02751-5|FINC_HUMAN Isoform 5 of Fibronectin OS=Homo sapiens OX=9606 GN=FN1;sp|P02751-3|FINC_HU	17	18	18	18	5	4	2	3	9	7	11	10	3	3	3	3	5	2	1	2	5	3	3	3	2	2	0	2	3	2	2	3	1	1	3	6	6	5	5	4	6	5
P02792	P02792	1	1	1	Ferritin light chain	FTL	sp|P02792|FRIL_HUMAN Ferritin light chain OS=Homo sapiens OX=9606 GN=FTL PE=1 SV=2	1	1	1	1	0	0	1	0	1	1	1	1	0	0	0	0	0	1	0	1	0	0	0	0	0	0	1	0	0	1	0	0	0	0	1	1	0	1	1	0	0	0
P02794	P02794	2	2	2	Ferritin heavy chain;Ferritin heavy chain, N-terminally processed	FTH1	sp|P02794|FRIH_HUMAN Ferritin heavy chain OS=Homo sapiens OX=9606 GN=FTH1 PE=1 SV=2	1	2	2	2	1	1	1	2	0	1	1	1	1	1	1	1	0	1	1	1	1	1	1	1	1	0	1	2	1	1	1	2	0	0	2	2	1	1	1	0	0	0
P03427	P03427	1	1	1			sp|P03427|PB2_I33A0 Polymerase basic protein 2 OS=Influenza A virus (strain A/Wilson-Smith/1933 H1N1) OX=381518 GN=PB2 PE=1 SV=1	1	1	1	1	0	0	0	0	0	0	0	0	0	0	0	0	0	0	0	0	0	0	0	0	0	0	0	0	0	0	0	0	0	0	0	0	0	0	0	0	0	0
P03974	P03974	40	1	1			sp|P03974|TERA_PIG Transitional endoplasmic reticulum ATPase OS=Sus scrofa OX=9823 GN=VCP PE=1 SV=5	1	40	1	1	23	22	23	21	25	17	23	22	23	21	25	21	23	20	22	21	21	21	25	21	23	18	22	23	23	21	22	25	24	22	23	26	21	23	24	23	24	21
P03999	P03999	2	2	2	Short-wave-sensitive opsin 1	OPN1SW	sp|P03999|OPSB_HUMAN Short-wave-sensitive opsin 1 OS=Homo sapiens OX=9606 GN=OPN1SW PE=1 SV=1	1	2	2	2	0	1	2	2	1	1	0	1	2	1	1	1	2	1	1	1	1	1	1	0	1	1	1	1	1	1	1	2	2	1	0	2	1	1	1	1	1	1
P0DN78;P0DN77;P04001;P04000	P0DN78;P0DN77;P04001;P04000	1;1;1;1	1;1;1;1	1;1;1;1	Medium-wave-sensitive opsin 1;Long-wave-sensitive opsin 1	OPN1MW;OPN1LW	sp|P0DN78|OPSG3_HUMAN Medium-wave-sensitive opsin 3 OS=Homo sapiens OX=9606 GN=OPN1MW3 PE=3 SV=1;sp|P0DN77|OPSG2_HUMAN Medium-wave-sensitive opsin 2 OS=Homo sapiens OX=9606 GN=OPN1MW2 PE=3 SV=1;sp|P04001|OPSG_HUMAN Medium-wave-sensitive opsin 1 OS=Homo sap	4	1	1	1	1	1	1	1	1	1	1	1	1	1	1	1	1	1	1	1	1	1	1	1	1	1	1	1	1	1	1	1	1	1	1	1	1	1	1	1	1	1
P04066	P04066	2	2	2	Tissue alpha-L-fucosidase	FUCA1	sp|P04066|FUCO_HUMAN Tissue alpha-L-fucosidase OS=Homo sapiens OX=9606 GN=FUCA1 PE=1 SV=4	1	2	2	2	1	1	1	1	0	1	1	1	1	1	1	1	1	0	1	1	0	0	1	1	1	1	1	1	1	1	1	1	1	1	1	1	1	1	1	1	1	1
P04075;P04075-2	P04075;P04075-2	16;16	13;13	13;13	Fructose-bisphosphate aldolase A	ALDOA	sp|P04075|ALDOA_HUMAN Fructose-bisphosphate aldolase A OS=Homo sapiens OX=9606 GN=ALDOA PE=1 SV=2;sp|P04075-2|ALDOA_HUMAN Isoform 2 of Fructose-bisphosphate aldolase A OS=Homo sapiens OX=9606 GN=ALDOA	2	16	13	13	8	8	9	9	6	9	7	11	8	7	9	11	6	8	8	10	8	9	10	11	8	9	8	10	9	11	12	10	10	12	12	12	8	10	9	10	10	11
P04114	P04114	2	2	2	Apolipoprotein B-100;Apolipoprotein B-48	APOB	sp|P04114|APOB_HUMAN Apolipoprotein B-100 OS=Homo sapiens OX=9606 GN=APOB PE=1 SV=2	1	2	2	2	0	1	0	0	0	1	1	1	0	0	0	0	0	0	0	0	0	0	0	0	0	0	0	0	0	0	0	0	0	0	0	0	0	1	0	0	0	0
P04163;P60903	P04163;P60903	2;2	2;2	2;2	Protein S100-A10	S100A10	sp|P04163|S10AA_PIG Protein S100-A10 OS=Sus scrofa OX=9823 GN=S100A10 PE=1 SV=2;sp|P60903|S10AA_HUMAN Protein S100-A10 OS=Homo sapiens OX=9606 GN=S100A10 PE=1 SV=2	2	2	2	2	0	0	1	0	0	2	1	0	0	0	0	0	0	0	0	1	0	1	0	1	0	0	0	0	1	1	1	0	0	1	1	1	1	0	1	2	1	0
P04175;P16435	P04175	8;2	8;2	8;2			sp|P04175|NCPR_PIG NADPH--cytochrome P450 reductase OS=Sus scrofa OX=9823 GN=POR PE=1 SV=2	2	8	8	8	2	3	2	2	3	4	3	2	3	1	3	2	5	4	3	2	4	2	2	2	3	3	2	2	4	2	1	2	4	2	3	4	4	3	2	2	3	4
P04178	P04178	9	9	9			sp|P04178|SODC_PIG Superoxide dismutase [Cu-Zn] OS=Sus scrofa OX=9823 GN=SOD1 PE=1 SV=2	1	9	9	9	5	6	6	6	6	6	6	6	5	5	6	7	5	6	6	7	6	6	7	6	6	7	7	6	7	6	6	7	6	6	7	6	5	4	5	7	6	8
P04179-4;P04179-2;P04179;P04179-3	P04179-4;P04179-2;P04179;P04179-3	2;2;2;1	1;1;1;1	1;1;1;1	Superoxide dismutase [Mn], mitochondrial	SOD2	sp|P04179-4|SODM_HUMAN Isoform 4 of Superoxide dismutase [Mn], mitochondrial OS=Homo sapiens OX=9606 GN=SOD2;sp|P04179-2|SODM_HUMAN Isoform 2 of Superoxide dismutase [Mn], mitochondrial OS=Homo sapiens OX=9606 GN=SOD2;sp|P04179|SODM_HUMAN Superoxide dismut	4	2	1	1	1	1	1	1	1	1	1	1	1	1	1	1	1	1	1	1	1	1	1	1	1	1	1	1	1	1	1	2	1	1	1	1	1	1	1	1	1	1
P04181	P04181	2	2	2	Ornithine aminotransferase, mitochondrial;Ornithine aminotransferase, hepatic form;Ornithine aminotransferase, renal form	OAT	sp|P04181|OAT_HUMAN Ornithine aminotransferase, mitochondrial OS=Homo sapiens OX=9606 GN=OAT PE=1 SV=1	1	2	2	2	2	1	1	1	2	1	0	1	1	0	1	2	2	1	0	1	2	1	1	2	1	1	1	1	1	0	1	1	1	0	1	1	1	1	2	0	1	0
P04216	P04216	2	2	2	Thy-1 membrane glycoprotein	THY1	sp|P04216|THY1_HUMAN Thy-1 membrane glycoprotein OS=Homo sapiens OX=9606 GN=THY1 PE=1 SV=2	1	2	2	2	2	2	1	1	2	2	2	2	2	2	1	2	1	2	2	2	1	2	2	2	1	2	2	2	1	2	2	2	1	2	2	2	2	2	1	2	2	2
P04264;CON__P04264	P04264;CON__P04264	29;28	29;28	21;20	Keratin, type II cytoskeletal 1	KRT1	sp|P04264|K2C1_HUMAN Keratin, type II cytoskeletal 1 OS=Homo sapiens OX=9606 GN=KRT1 PE=1 SV=6;	2	29	29	21	15	17	17	21	13	14	16	15	13	15	14	15	10	14	14	16	12	15	14	14	16	15	15	17	15	18	17	18	14	14	16	17	12	15	15	17	15	17
P04350	P04350	26	6	4	Tubulin beta-4A chain	TUBB4A	sp|P04350|TBB4A_HUMAN Tubulin beta-4A chain OS=Homo sapiens OX=9606 GN=TUBB4A PE=1 SV=2	1	26	6	4	18	20	20	20	20	22	20	20	18	19	18	18	18	20	20	20	19	20	19	20	20	19	20	19	20	19	19	19	23	23	21	23	23	23	24	23	22	24
P04366	P04366	6	6	6			sp|P04366|AMBP_PIG Protein AMBP (Fragment) OS=Sus scrofa OX=9823 GN=AMBP PE=1 SV=2	1	6	6	6	1	3	2	1	3	4	3	3	1	0	1	1	1	3	2	1	0	1	1	0	0	1	2	1	1	2	1	1	3	3	4	3	2	4	3	3	2	3
P04406;P04406-2	P04406;P04406-2	9;8	2;2	2;2	Glyceraldehyde-3-phosphate dehydrogenase	GAPDH	sp|P04406|G3P_HUMAN Glyceraldehyde-3-phosphate dehydrogenase OS=Homo sapiens OX=9606 GN=GAPDH PE=1 SV=3;sp|P04406-2|G3P_HUMAN Isoform 2 of Glyceraldehyde-3-phosphate dehydrogenase OS=Homo sapiens OX=9606 GN=GAPDH	2	9	2	2	6	5	4	4	4	4	4	4	4	4	4	4	4	4	4	5	4	4	4	5	4	4	4	5	4	4	4	5	5	5	5	4	5	4	4	4	5	5
P04424-2;P04424	P04424-2;P04424	1;1	1;1	1;1	Argininosuccinate lyase	ASL	sp|P04424-2|ARLY_HUMAN Isoform 2 of Argininosuccinate lyase OS=Homo sapiens OX=9606 GN=ASL;sp|P04424|ARLY_HUMAN Argininosuccinate lyase OS=Homo sapiens OX=9606 GN=ASL PE=1 SV=4	2	1	1	1	1	1	0	1	1	1	1	1	1	1	1	1	1	1	1	1	1	1	1	1	1	1	1	1	1	1	1	1	1	1	1	1	1	1	1	1	1	1
P04439-2;P04439;P01893	P04439-2;P04439;P01893	2;2;1	2;2;1	2;2;1	HLA class I histocompatibility antigen, A-3 alpha chain;Putative HLA class I histocompatibility antigen, alpha chain H	HLA-A;HLA-H	sp|P04439-2|HLAA_HUMAN Isoform 2 of HLA class I histocompatibility antigen, A alpha chain OS=Homo sapiens OX=9606 GN=HLA-A;sp|P04439|HLAA_HUMAN HLA class I histocompatibility antigen, A alpha chain OS=Homo sapiens OX=9606 GN=HLA-A PE=1 SV=2;sp|P01893|HLAH_	3	2	2	2	1	1	1	1	1	1	1	1	0	1	0	0	1	2	0	1	1	2	0	1	0	0	1	0	1	0	1	1	1	1	1	1	1	2	1	2	1	2
P04574;P04632	P04574;P04632	5;3	5;3	5;3	Calpain small subunit 1	CAPNS1	sp|P04574|CPNS1_PIG Calpain small subunit 1 OS=Sus scrofa OX=9823 GN=CAPNS1 PE=1 SV=1;sp|P04632|CPNS1_HUMAN Calpain small subunit 1 OS=Homo sapiens OX=9606 GN=CAPNS1 PE=1 SV=1	2	5	5	5	4	3	4	2	3	4	4	1	3	3	2	0	2	3	3	2	5	2	2	2	5	3	4	2	3	4	3	2	4	3	2	4	5	5	4	3	4	3
P04792	P04792	4	3	3	Heat shock protein beta-1	HSPB1	sp|P04792|HSPB1_HUMAN Heat shock protein beta-1 OS=Homo sapiens OX=9606 GN=HSPB1 PE=1 SV=2	1	4	3	3	2	2	2	1	1	1	1	1	1	1	1	1	1	1	1	1	1	1	1	1	1	1	1	1	1	1	1	1	2	1	1	1	1	1	1	1	1	0
P04843	P04843	9	1	1	Dolichyl-diphosphooligosaccharide--protein glycosyltransferase subunit 1	RPN1	sp|P04843|RPN1_HUMAN Dolichyl-diphosphooligosaccharide--protein glycosyltransferase subunit 1 OS=Homo sapiens OX=9606 GN=RPN1 PE=1 SV=1	1	9	1	1	5	3	4	5	4	4	5	5	4	3	6	4	4	5	3	6	4	3	4	5	5	4	4	5	5	4	6	5	4	3	5	6	6	3	3	5	6	5
P04899;P04899-6;P04899-3;P04899-5;P04899-2;P04899-4	P04899;P04899-6;P04899-3;P04899-5;P04899-2;P04899-4	12;11;11;11;11;11	9;9;9;9;9;8	7;7;7;7;7;7	Guanine nucleotide-binding protein G(i) subunit alpha-2	GNAI2	sp|P04899|GNAI2_HUMAN Guanine nucleotide-binding protein G(i) subunit alpha-2 OS=Homo sapiens OX=9606 GN=GNAI2 PE=1 SV=3;sp|P04899-6|GNAI2_HUMAN Isoform 6 of Guanine nucleotide-binding protein G(i) subunit alpha-2 OS=Homo sapiens OX=9606 GN=GNAI2;sp|P04899	6	12	9	7	7	8	9	8	8	9	8	8	9	8	10	7	11	9	8	9	9	10	8	8	9	10	7	9	8	9	8	10	10	8	10	10	6	8	10	9	6	9
P05023-3;P05023-4;P05023;P05023-2	P05023-3;P05023-4;P05023;P05023-2	31;31;31;18	17;17;17;13	1;1;1;1	Sodium/potassium-transporting ATPase subunit alpha-1	ATP1A1	sp|P05023-3|AT1A1_HUMAN Isoform 3 of Sodium/potassium-transporting ATPase subunit alpha-1 OS=Homo sapiens OX=9606 GN=ATP1A1;sp|P05023-4|AT1A1_HUMAN Isoform 4 of Sodium/potassium-transporting ATPase subunit alpha-1 OS=Homo sapiens OX=9606 GN=ATP1A1;sp|P0502	4	31	17	1	20	19	20	23	17	19	20	23	21	20	21	22	19	20	22	24	20	20	22	23	19	21	22	23	21	20	21	24	24	25	23	27	20	22	22	21	20	22
P05027;P05026-2;P05026	P05027	9;2;2	9;2;2	9;2;2			sp|P05027|AT1B1_PIG Sodium/potassium-transporting ATPase subunit beta-1 OS=Sus scrofa OX=9823 GN=ATP1B1 PE=1 SV=2	3	9	9	9	6	6	5	7	5	6	6	5	6	5	5	6	4	6	6	6	5	6	5	6	5	7	5	5	6	5	6	5	6	6	7	6	5	6	6	6	6	6
P05107	P05107	2	1	1	Integrin beta-2	ITGB2	sp|P05107|ITB2_HUMAN Integrin beta-2 OS=Homo sapiens OX=9606 GN=ITGB2 PE=1 SV=2	1	2	1	1	0	0	0	0	0	0	0	1	0	0	0	1	0	0	0	1	0	0	0	1	0	0	0	0	1	0	0	1	0	0	0	0	0	0	0	1	0	0
P05141;Q9H0C2	P05141	15;1	15;1	7;0	ADP/ATP translocase 2;ADP/ATP translocase 2, N-terminally processed	SLC25A5	sp|P05141|ADT2_HUMAN ADP/ATP translocase 2 OS=Homo sapiens OX=9606 GN=SLC25A5 PE=1 SV=7	2	15	15	7	7	8	9	8	8	7	9	7	7	9	8	7	9	7	7	8	8	8	9	8	8	7	10	9	8	8	8	8	9	8	8	8	7	8	7	8	9	7
P05164-2;P05164;P05164-3	P05164-2;P05164;P05164-3	2;2;2	2;2;2	2;2;2	Myeloperoxidase;Myeloperoxidase;89 kDa myeloperoxidase;84 kDa myeloperoxidase;Myeloperoxidase light chain;Myeloperoxidase heavy chain	MPO	sp|P05164-2|PERM_HUMAN Isoform H14 of Myeloperoxidase OS=Homo sapiens OX=9606 GN=MPO;sp|P05164|PERM_HUMAN Myeloperoxidase OS=Homo sapiens OX=9606 GN=MPO PE=1 SV=1;sp|P05164-3|PERM_HUMAN Isoform H7 of Myeloperoxidase OS=Homo sapiens OX=9606 GN=MPO	3	2	2	2	0	1	0	0	0	0	0	0	0	0	1	0	0	0	0	0	0	2	2	0	1	0	0	0	0	0	0	0	0	0	0	0	0	0	0	0	0	0
P05165-3;P05165-2;P05165	P05165-3;P05165-2;P05165	5;5;5	2;2;2	2;2;2	Propionyl-CoA carboxylase alpha chain, mitochondrial	PCCA	sp|P05165-3|PCCA_HUMAN Isoform 3 of Propionyl-CoA carboxylase alpha chain, mitochondrial OS=Homo sapiens OX=9606 GN=PCCA;sp|P05165-2|PCCA_HUMAN Isoform 2 of Propionyl-CoA carboxylase alpha chain, mitochondrial OS=Homo sapiens OX=9606 GN=PCCA;sp|P05165|PCCA	3	5	2	2	4	3	1	0	4	0	0	1	3	0	0	1	3	4	0	0	3	2	0	0	4	2	1	1	3	2	0	0	3	2	0	1	3	2	1	3	4	2
P05186;P05186-2;P05186-3	P05186;P05186-2;P05186-3	3;2;2	3;2;2	3;2;2	Alkaline phosphatase, tissue-nonspecific isozyme	ALPL	sp|P05186|PPBT_HUMAN Alkaline phosphatase, tissue-nonspecific isozyme OS=Homo sapiens OX=9606 GN=ALPL PE=1 SV=4;sp|P05186-2|PPBT_HUMAN Isoform 2 of Alkaline phosphatase, tissue-nonspecific isozyme OS=Homo sapiens OX=9606 GN=ALPL;sp|P05186-3|PPBT_HUMAN Isof	3	3	3	3	0	0	1	1	0	0	2	0	0	0	1	1	1	0	2	1	1	0	1	1	1	0	0	1	0	0	1	1	1	1	1	2	0	0	1	2	0	2
P05198;P20460	P05198	7;1	7;1	7;1	Eukaryotic translation initiation factor 2 subunit 1	EIF2S1	sp|P05198|IF2A_HUMAN Eukaryotic translation initiation factor 2 subunit 1 OS=Homo sapiens OX=9606 GN=EIF2S1 PE=1 SV=3	2	7	7	7	4	1	2	2	1	0	2	1	1	1	2	2	3	2	1	1	2	1	2	2	2	1	3	2	4	1	3	2	1	1	4	1	3	1	2	1	2	2
P05230;P20002;P05230-2	P05230;P20002;P05230-2	2;1;1	2;1;1	2;1;1	Fibroblast growth factor 1	FGF1	sp|P05230|FGF1_HUMAN Fibroblast growth factor 1 OS=Homo sapiens OX=9606 GN=FGF1 PE=1 SV=1;sp|P20002|FGF1_PIG Fibroblast growth factor 1 (Fragment) OS=Sus scrofa OX=9823 GN=FGF1 PE=1 SV=2;sp|P05230-2|FGF1_HUMAN Isoform 2 of Fibroblast growth factor 1 OS=Hom	3	2	2	2	0	0	0	0	1	0	0	0	0	0	0	0	0	1	0	1	1	1	0	0	1	1	0	0	0	0	0	0	1	0	0	1	1	1	1	1	0	0
P05383;P22694-4;P22694-3;P22694;P22694-5;P22694-7;P22694-6;P22694-9;P22694-2;P22694-10;P22694-8	P05383;P22694-4;P22694-3;P22694;P22694-5;P22694-7;P22694-6;P22694-9;P22694-2;P22694-10	8;6;6;6;6;6;6;6;6;5;3	4;2;2;2;2;2;2;2;2;1;2	4;2;2;2;2;2;2;2;2;1;2	cAMP-dependent protein kinase catalytic subunit beta	PRKACB	sp|P05383|KAPCB_PIG cAMP-dependent protein kinase catalytic subunit beta OS=Sus scrofa OX=9823 GN=PRKACB PE=1 SV=3;sp|P22694-4|KAPCB_HUMAN Isoform 4 of cAMP-dependent protein kinase catalytic subunit beta OS=Homo sapiens OX=9606 GN=PRKACB;sp|P22694-3|KAPCB	11	8	4	4	4	4	5	4	4	5	4	3	4	4	6	4	3	4	5	3	4	5	5	3	5	6	5	5	6	5	5	6	5	6	5	5	6	3	5	5	6	3
P05386	P05386	3	3	3	60S acidic ribosomal protein P1	RPLP1	sp|P05386|RLA1_HUMAN 60S acidic ribosomal protein P1 OS=Homo sapiens OX=9606 GN=RPLP1 PE=1 SV=1	1	3	3	3	2	2	2	1	2	2	2	1	2	2	1	2	2	2	2	1	2	2	1	1	2	2	2	1	2	1	1	1	2	2	2	2	2	2	2	1	3	2
P05387	P05387	6	6	5	60S acidic ribosomal protein P2	RPLP2	sp|P05387|RLA2_HUMAN 60S acidic ribosomal protein P2 OS=Homo sapiens OX=9606 GN=RPLP2 PE=1 SV=1	1	6	6	5	3	3	3	4	2	3	3	3	4	3	3	4	4	2	3	4	3	3	2	4	3	3	3	3	3	3	3	3	3	2	6	5	3	3	3	3	3	4
P05455	P05455	3	3	3	Lupus La protein	SSB	sp|P05455|LA_HUMAN Lupus La protein OS=Homo sapiens OX=9606 GN=SSB PE=1 SV=2	1	3	3	3	1	0	2	1	1	1	2	2	0	1	0	1	1	1	1	2	2	2	1	2	1	1	2	2	1	1	2	3	1	1	1	1	0	2	1	1	0	0
P05771;P05771-2	P05771;P05771-2	8;8	1;1	1;1	Protein kinase C beta type	PRKCB	sp|P05771|KPCB_HUMAN Protein kinase C beta type OS=Homo sapiens OX=9606 GN=PRKCB PE=1 SV=4;sp|P05771-2|KPCB_HUMAN Isoform Beta-II of Protein kinase C beta type OS=Homo sapiens OX=9606 GN=PRKCB	2	8	1	1	3	4	3	4	4	3	4	3	3	4	3	2	5	3	3	3	5	3	4	5	4	2	3	3	4	3	3	5	4	4	5	6	4	3	4	4	4	4
P05783;CON__H-INV:HIT000015463	P05783;CON__H-INV:HIT000015463	2;1	1;1	1;1	Keratin, type I cytoskeletal 18	KRT18	sp|P05783|K1C18_HUMAN Keratin, type I cytoskeletal 18 OS=Homo sapiens OX=9606 GN=KRT18 PE=1 SV=2;	2	2	1	1	1	0	0	0	0	0	0	0	0	0	0	0	0	0	1	0	0	0	0	0	0	0	0	0	0	0	0	0	0	0	0	0	0	0	1	0	1	0
P05813-2;P05813	P05813-2;P05813	3;3	3;3	3;3	Beta-crystallin A3;Beta-crystallin A3, isoform A1, Delta4 form;Beta-crystallin A3, isoform A1, Delta7 form;Beta-crystallin A3, isoform A1, Delta8 form	CRYBA1	sp|P05813-2|CRBA1_HUMAN Isoform A1 of Beta-crystallin A3 OS=Homo sapiens OX=9606 GN=CRYBA1;sp|P05813|CRBA1_HUMAN Beta-crystallin A3 OS=Homo sapiens OX=9606 GN=CRYBA1 PE=1 SV=4	2	3	3	3	0	0	0	0	0	0	0	0	0	0	0	0	0	0	0	0	0	0	0	0	0	0	0	0	0	0	0	0	0	0	0	0	0	0	0	0	0	0
P05937;P05937-2	P05937;P05937-2	7;6	6;5	6;5	Calbindin	CALB1	sp|P05937|CALB1_HUMAN Calbindin OS=Homo sapiens OX=9606 GN=CALB1 PE=1 SV=2;sp|P05937-2|CALB1_HUMAN Isoform 2 of Calbindin OS=Homo sapiens OX=9606 GN=CALB1	2	7	6	6	3	4	4	4	2	3	3	3	4	3	4	5	4	4	4	4	2	3	4	4	3	5	5	4	3	4	4	4	4	4	4	5	2	2	5	4	3	3
P05997	P05997	1	1	1	Collagen alpha-2(V) chain	COL5A2	sp|P05997|CO5A2_HUMAN Collagen alpha-2(V) chain OS=Homo sapiens OX=9606 GN=COL5A2 PE=1 SV=3	1	1	1	1	1	1	1	0	1	1	1	1	1	1	0	0	0	1	1	1	1	1	1	1	1	0	0	0	1	0	0	0	1	1	1	1	1	1	1	1	1	0
P06132	P06132	2	2	2	Uroporphyrinogen decarboxylase	UROD	sp|P06132|DCUP_HUMAN Uroporphyrinogen decarboxylase OS=Homo sapiens OX=9606 GN=UROD PE=1 SV=2	1	2	2	2	0	0	1	1	1	1	1	1	1	1	1	2	1	1	1	1	1	1	1	1	1	0	1	1	0	0	1	1	1	1	2	2	1	1	2	1	1	1
P06213-2;P06213	P06213-2;P06213	3;3	3;3	3;3	Insulin receptor;Insulin receptor subunit alpha;Insulin receptor subunit beta	INSR	sp|P06213-2|INSR_HUMAN Isoform Short of Insulin receptor OS=Homo sapiens OX=9606 GN=INSR;sp|P06213|INSR_HUMAN Insulin receptor OS=Homo sapiens OX=9606 GN=INSR PE=1 SV=4	2	3	3	3	1	1	1	1	1	1	1	1	0	1	1	1	1	1	0	0	1	0	1	1	1	1	1	1	1	0	1	1	1	0	1	1	2	1	1	0	1	1
P06276	P06276	2	2	2	Cholinesterase	BCHE	sp|P06276|CHLE_HUMAN Cholinesterase OS=Homo sapiens OX=9606 GN=BCHE PE=1 SV=1	1	2	2	2	0	1	1	2	0	1	0	0	1	0	0	2	0	2	0	1	1	0	1	1	0	0	1	1	2	2	1	1	2	1	2	2	0	0	1	1	0	0
P06280	P06280	2	2	2	Alpha-galactosidase A	GLA	sp|P06280|AGAL_HUMAN Alpha-galactosidase A OS=Homo sapiens OX=9606 GN=GLA PE=1 SV=1	1	2	2	2	1	1	1	1	1	1	1	1	1	1	1	0	1	1	1	1	2	1	1	1	1	1	1	1	1	1	1	0	1	1	1	1	1	1	1	0	1	1
P06348;P22492;Q02539	P06348;P22492;Q02539	3;2;2	1;0;0	1;0;0	Histone H1t;Histone H1.1	HIST1H1T;HIST1H1A	sp|P06348|H1T_PIG Histone H1t OS=Sus scrofa OX=9823 GN=H1-6 PE=1 SV=1;sp|P22492|H1T_HUMAN Histone H1t OS=Homo sapiens OX=9606 GN=H1-6 PE=2 SV=4;sp|Q02539|H11_HUMAN Histone H1.1 OS=Homo sapiens OX=9606 GN=H1-1 PE=1 SV=3	3	3	1	1	2	2	1	2	2	2	2	2	2	2	2	2	2	1	2	2	2	1	1	2	2	2	1	2	2	1	2	2	2	2	2	2	2	2	1	1	2	2
P06396-4;P06396-2;P06396-3;P06396	P06396-4;P06396-2;P06396-3;P06396	7;6;6;6	1;0;0;0	1;0;0;0	Gelsolin	GSN	sp|P06396-4|GELS_HUMAN Isoform 4 of Gelsolin OS=Homo sapiens OX=9606 GN=GSN;sp|P06396-2|GELS_HUMAN Isoform 2 of Gelsolin OS=Homo sapiens OX=9606 GN=GSN;sp|P06396-3|GELS_HUMAN Isoform 3 of Gelsolin OS=Homo sapiens OX=9606 GN=GSN;sp|P06396|GELS_HUMAN Gelsoli	4	7	1	1	3	4	4	4	1	3	4	3	3	4	3	2	3	3	3	2	3	4	3	3	1	4	3	2	3	4	4	3	4	3	4	4	4	4	4	3	5	3
P06454-2;P06454	P06454-2;P06454	2;2	2;2	2;2	Prothymosin alpha;Prothymosin alpha, N-terminally processed;Thymosin alpha-1	PTMA	sp|P06454-2|PTMA_HUMAN Isoform 2 of Prothymosin alpha OS=Homo sapiens OX=9606 GN=PTMA;sp|P06454|PTMA_HUMAN Prothymosin alpha OS=Homo sapiens OX=9606 GN=PTMA PE=1 SV=2	2	2	2	2	0	2	1	1	0	2	1	2	2	2	1	1	0	2	1	2	1	1	1	1	1	2	2	1	1	2	1	1	1	2	2	2	0	2	1	1	1	1
P06485	P06485	1	1	1			sp|P06485|US02_HHV11 Protein US2 OS=Human herpesvirus 1 (strain 17) OX=10299 GN=US2 PE=1 SV=3	1	1	1	1	0	0	0	0	0	0	0	0	0	0	0	0	0	0	0	0	0	0	0	0	0	0	0	0	0	0	0	0	0	0	0	0	0	0	0	0	0	0
P06576	P06576	27	27	27	ATP synthase subunit beta, mitochondrial	ATP5B	sp|P06576|ATPB_HUMAN ATP synthase subunit beta, mitochondrial OS=Homo sapiens OX=9606 GN=ATP5F1B PE=1 SV=3	1	27	27	27	22	23	23	21	23	21	23	24	22	23	23	21	21	23	24	24	23	24	25	23	24	24	23	23	24	23	24	24	26	22	24	26	24	24	24	24	23	25
P06702	P06702	3	3	3	Protein S100-A9	S100A9	sp|P06702|S10A9_HUMAN Protein S100-A9 OS=Homo sapiens OX=9606 GN=S100A9 PE=1 SV=1	1	3	3	3	2	2	2	2	0	0	0	0	0	0	0	0	0	0	0	0	0	0	0	0	0	0	0	0	0	0	0	0	0	0	0	0	0	0	0	0	1	0
P06733;P06733-2	P06733;P06733-2	20;13	20;13	15;10	Alpha-enolase	ENO1	sp|P06733|ENOA_HUMAN Alpha-enolase OS=Homo sapiens OX=9606 GN=ENO1 PE=1 SV=2;sp|P06733-2|ENOA_HUMAN Isoform MBP-1 of Alpha-enolase OS=Homo sapiens OX=9606 GN=ENO1	2	20	20	15	10	12	11	13	10	12	12	11	11	10	11	10	10	11	10	9	12	12	11	10	9	11	11	11	11	13	9	13	13	13	11	13	13	13	13	13	14	17
P06737-2;P06737	P06737-2;P06737	11;11	8;8	8;8	Glycogen phosphorylase, liver form	PYGL	sp|P06737-2|PYGL_HUMAN Isoform 2 of Glycogen phosphorylase, liver form OS=Homo sapiens OX=9606 GN=PYGL;sp|P06737|PYGL_HUMAN Glycogen phosphorylase, liver form OS=Homo sapiens OX=9606 GN=PYGL PE=1 SV=4	2	11	8	8	6	7	7	5	6	6	6	4	6	5	5	4	5	6	6	4	5	7	4	4	7	6	6	5	7	6	5	6	6	7	5	7	7	6	7	4	7	6
P06746	P06746	2	2	2	DNA polymerase beta	POLB	sp|P06746|DPOLB_HUMAN DNA polymerase beta OS=Homo sapiens OX=9606 GN=POLB PE=1 SV=3	1	2	2	2	0	0	0	0	0	0	0	0	1	0	0	0	0	0	0	0	0	0	0	0	0	0	0	0	0	0	0	0	0	0	0	0	0	0	1	0	0	0
P06748;P06748-2;P06748-3	P06748;P06748-2;P06748-3	8;8;7	8;8;7	8;8;7	Nucleophosmin	NPM1	sp|P06748|NPM_HUMAN Nucleophosmin OS=Homo sapiens OX=9606 GN=NPM1 PE=1 SV=2;sp|P06748-2|NPM_HUMAN Isoform 2 of Nucleophosmin OS=Homo sapiens OX=9606 GN=NPM1;sp|P06748-3|NPM_HUMAN Isoform 3 of Nucleophosmin OS=Homo sapiens OX=9606 GN=NPM1	3	8	8	8	5	5	5	4	6	4	4	5	5	3	4	4	6	4	4	5	6	5	2	4	5	5	3	5	6	4	4	4	5	5	4	4	5	4	4	5	5	4
P06753-5;P06753-2;P06753-4;P06753-3;P06753-7	P06753-5;P06753-2;P06753-4;P06753-3;P06753-7	9;9;8;8;5	1;1;0;0;1	1;1;0;0;1	Tropomyosin alpha-3 chain	TPM3	sp|P06753-5|TPM3_HUMAN Isoform 5 of Tropomyosin alpha-3 chain OS=Homo sapiens OX=9606 GN=TPM3;sp|P06753-2|TPM3_HUMAN Isoform 2 of Tropomyosin alpha-3 chain OS=Homo sapiens OX=9606 GN=TPM3;sp|P06753-4|TPM3_HUMAN Isoform 4 of Tropomyosin alpha-3 chain OS=Hom	5	9	1	1	1	3	4	6	2	3	5	4	3	5	2	4	2	2	4	4	2	3	6	4	2	3	3	3	4	4	5	6	4	3	5	6	2	2	2	4	0	3
P06753-6;A1XQV4;P06753	P06753-6;A1XQV4;P06753	9;7;7	9;7;7	1;1;1	Tropomyosin alpha-3 chain	TPM3	sp|P06753-6|TPM3_HUMAN Isoform 6 of Tropomyosin alpha-3 chain OS=Homo sapiens OX=9606 GN=TPM3;sp|A1XQV4|TPM3_PIG Tropomyosin alpha-3 chain OS=Sus scrofa OX=9823 GN=TPM3 PE=2 SV=1;sp|P06753|TPM3_HUMAN Tropomyosin alpha-3 chain OS=Homo sapiens OX=9606 GN=TPM	3	9	9	1	1	3	4	5	2	3	4	4	2	5	2	4	2	2	4	5	2	4	5	4	2	3	3	3	3	4	4	5	4	3	4	5	2	2	2	3	0	3
P06756-3;P06756-2;P06756	P06756-3;P06756-2;P06756	7;7;7	7;7;7	7;7;7	Integrin alpha-V;Integrin alpha-V heavy chain;Integrin alpha-V light chain	ITGAV	sp|P06756-3|ITAV_HUMAN Isoform 3 of Integrin alpha-V OS=Homo sapiens OX=9606 GN=ITGAV;sp|P06756-2|ITAV_HUMAN Isoform 2 of Integrin alpha-V OS=Homo sapiens OX=9606 GN=ITGAV;sp|P06756|ITAV_HUMAN Integrin alpha-V OS=Homo sapiens OX=9606 GN=ITGAV PE=1 SV=2	3	7	7	7	4	6	5	3	3	5	3	4	6	4	5	5	5	5	4	4	5	4	5	4	5	4	4	2	5	4	4	5	6	3	6	6	5	6	5	3	5	5
P06867;CON__P06868	P06867	17;2	17;2	17;2			sp|P06867|PLMN_PIG Plasminogen OS=Sus scrofa OX=9823 GN=PLG PE=1 SV=3	2	17	17	17	5	7	9	9	8	9	10	10	3	8	5	4	2	4	4	4	6	7	3	4	4	2	2	3	5	5	7	4	9	7	8	7	7	7	11	10	6	6
Q16778;P33778;P23527;P06899;Q8N257;Q6DRA6;Q6DN03	Q16778;P33778;P23527;P06899;Q8N257	7;7;7;7;6;2;2	7;7;7;7;6;2;2	2;2;2;2;2;2;2	Histone H2B type 2-E;Histone H2B type 1-B;Histone H2B type 1-O;Histone H2B type 1-J;Histone H2B type 3-B	HIST2H2BE;HIST1H2BB;HIST1H2BO;HIST1H2BJ;HIST3H2BB	sp|Q16778|H2B2E_HUMAN Histone H2B type 2-E OS=Homo sapiens OX=9606 GN=H2BC21 PE=1 SV=3;sp|P33778|H2B1B_HUMAN Histone H2B type 1-B OS=Homo sapiens OX=9606 GN=H2BC3 PE=1 SV=2;sp|P23527|H2B1O_HUMAN Histone H2B type 1-O OS=Homo sapiens OX=9606 GN=H2BC17 PE=1 S	7	7	7	2	4	5	4	6	3	5	6	6	4	5	4	4	3	5	5	7	3	5	5	5	5	3	6	4	6	6	6	6	6	4	6	7	4	4	4	6	3	6
P07099	P07099	4	1	1	Epoxide hydrolase 1	EPHX1	sp|P07099|HYEP_HUMAN Epoxide hydrolase 1 OS=Homo sapiens OX=9606 GN=EPHX1 PE=1 SV=1	1	4	1	1	1	2	2	3	3	2	3	4	2	3	3	4	2	2	4	4	2	1	2	3	2	2	3	3	2	2	2	2	2	3	3	3	2	2	1	2	1	3
P07196	P07196	22	5	5	Neurofilament light polypeptide	NEFL	sp|P07196|NFL_HUMAN Neurofilament light polypeptide OS=Homo sapiens OX=9606 GN=NEFL PE=1 SV=3	1	22	5	5	14	12	12	14	10	13	13	16	11	12	13	12	9	14	12	14	12	14	13	13	13	11	12	13	13	13	11	13	14	14	15	14	12	12	10	13	14	14
P07197;P07197-2	P07197	17;6	14;3	3;1	Neurofilament medium polypeptide	NEFM	sp|P07197|NFM_HUMAN Neurofilament medium polypeptide OS=Homo sapiens OX=9606 GN=NEFM PE=1 SV=3	2	17	14	3	10	8	8	9	9	9	11	10	7	7	8	10	8	10	10	11	9	10	7	9	9	7	11	10	9	9	8	11	11	10	10	13	9	8	9	9	9	10
P07237	P07237	8	8	8	Protein disulfide-isomerase	P4HB	sp|P07237|PDIA1_HUMAN Protein disulfide-isomerase OS=Homo sapiens OX=9606 GN=P4HB PE=1 SV=3	1	8	8	8	5	6	7	7	5	7	7	7	6	7	8	5	6	6	7	6	5	7	7	7	7	7	6	6	7	7	6	7	7	6	7	7	5	8	7	7	5	7
P07305-2;P07305	P07305-2;P07305	3;3	3;3	3;3	Histone H1.0;Histone H1.0, N-terminally processed	H1F0	sp|P07305-2|H10_HUMAN Isoform 2 of Histone H1.0 OS=Homo sapiens OX=9606 GN=H1-0;sp|P07305|H10_HUMAN Histone H1.0 OS=Homo sapiens OX=9606 GN=H1-0 PE=1 SV=3	2	3	3	3	1	1	1	1	1	2	2	2	1	1	1	2	1	2	2	1	1	1	2	1	2	2	1	1	2	2	2	1	3	1	2	2	1	2	1	1	1	1
P07357	P07357	1	1	1	Complement component C8 alpha chain	C8A	sp|P07357|CO8A_HUMAN Complement component C8 alpha chain OS=Homo sapiens OX=9606 GN=C8A PE=1 SV=2	1	1	1	1	0	0	0	0	1	0	0	0	0	0	0	0	0	0	0	0	0	0	0	0	0	0	0	0	0	0	0	0	0	0	1	0	0	0	0	0	0	0
Q767L7;P07437	Q767L7;P07437	25;25	5;5	5;5	Tubulin beta chain	TUBB	sp|Q767L7|TBB5_PIG Tubulin beta chain OS=Sus scrofa OX=9823 GN=TUBB PE=2 SV=1;sp|P07437|TBB5_HUMAN Tubulin beta chain OS=Homo sapiens OX=9606 GN=TUBB PE=1 SV=2	2	25	5	5	18	20	19	19	21	23	20	21	18	18	18	17	19	20	20	20	19	20	20	20	20	20	20	18	21	18	20	20	23	23	22	23	22	23	24	23	22	24
P07737	P07737	4	1	1	Profilin-1	PFN1	sp|P07737|PROF1_HUMAN Profilin-1 OS=Homo sapiens OX=9606 GN=PFN1 PE=1 SV=2	1	4	1	1	3	2	2	3	2	3	3	2	3	3	4	4	3	3	3	3	2	3	3	3	3	2	2	3	3	2	3	3	3	2	3	3	3	3	2	3	3	2
P07802;P10644;P10644-2	P07802;P10644;P10644-2	4;4;3	4;4;3	4;4;3	cAMP-dependent protein kinase type I-alpha regulatory subunit;cAMP-dependent protein kinase type I-alpha regulatory subunit, N-terminally processed	PRKAR1A	sp|P07802|KAP0_PIG cAMP-dependent protein kinase type I-alpha regulatory subunit OS=Sus scrofa OX=9823 GN=PRKAR1A PE=1 SV=2;sp|P10644|KAP0_HUMAN cAMP-dependent protein kinase type I-alpha regulatory subunit OS=Homo sapiens OX=9606 GN=PRKAR1A PE=1 SV=1;sp|P	3	4	4	4	2	2	2	1	2	2	1	1	2	1	2	2	2	2	1	2	3	2	2	3	2	2	1	0	2	1	1	2	2	1	2	2	2	2	1	1	2	2
P07814	P07814	8	8	8	Bifunctional glutamate/proline--tRNA ligase;Glutamate--tRNA ligase;Proline--tRNA ligase	EPRS	sp|P07814|SYEP_HUMAN Bifunctional glutamate/proline--tRNA ligase OS=Homo sapiens OX=9606 GN=EPRS1 PE=1 SV=5	1	8	8	8	2	4	3	3	4	2	3	3	5	3	2	3	5	4	1	4	6	2	4	3	6	3	3	3	6	4	3	5	5	2	4	5	5	5	3	2	3	5
P07910-4;P07910-2;P07910;P0DMR1;O60812;B7ZW38;B2RXH8;P07910-3	P07910-4;P07910-2;P07910;P0DMR1;O60812;B7ZW38;B2RXH8	8;8;7;4;4;4;4;3	8;8;7;4;4;4;4;3	8;8;7;4;4;4;4;3	Heterogeneous nuclear ribonucleoproteins C1/C2;Heterogeneous nuclear ribonucleoprotein C-like 4;Heterogeneous nuclear ribonucleoprotein C-like 1;Heterogeneous nuclear ribonucleoprotein C-like 3;Heterogeneous nuclear ribonucleoprotein C-like 2	HNRNPC;HNRNPCL4;HNRNPCL1;HNRNPCL3;HNRNPCL2	sp|P07910-4|HNRPC_HUMAN Isoform 4 of Heterogeneous nuclear ribonucleoproteins C1/C2 OS=Homo sapiens OX=9606 GN=HNRNPC;sp|P07910-2|HNRPC_HUMAN Isoform C1 of Heterogeneous nuclear ribonucleoproteins C1/C2 OS=Homo sapiens OX=9606 GN=HNRNPC;sp|P07910|HNRPC_HUM	8	8	8	8	4	5	4	3	4	6	4	4	3	3	4	4	4	6	5	4	3	5	4	4	3	4	3	4	3	4	3	3	4	4	4	4	4	4	5	4	4	6
P07942	P07942	2	2	2	Laminin subunit beta-1	LAMB1	sp|P07942|LAMB1_HUMAN Laminin subunit beta-1 OS=Homo sapiens OX=9606 GN=LAMB1 PE=1 SV=2	1	2	2	2	0	1	0	0	0	0	1	0	0	0	0	0	0	0	0	0	1	0	0	0	1	0	0	0	1	0	0	0	0	0	0	0	0	0	0	0	0	0
P07951-3;P07951-2	P07951-3;P07951-2	6;6	2;2	2;2	Tropomyosin beta chain	TPM2	sp|P07951-3|TPM2_HUMAN Isoform 3 of Tropomyosin beta chain OS=Homo sapiens OX=9606 GN=TPM2;sp|P07951-2|TPM2_HUMAN Isoform 2 of Tropomyosin beta chain OS=Homo sapiens OX=9606 GN=TPM2	2	6	2	2	2	2	3	4	1	2	5	3	1	2	2	1	2	1	3	3	2	2	5	4	2	3	4	1	3	4	5	4	3	3	4	5	1	0	2	2	1	2
P07996;CON__Q28194;P07996-2	P07996;CON__Q28194;P07996-2	6;5;4	6;5;4	6;5;4	Thrombospondin-1	THBS1	sp|P07996|TSP1_HUMAN Thrombospondin-1 OS=Homo sapiens OX=9606 GN=THBS1 PE=1 SV=2;;sp|P07996-2|TSP1_HUMAN Isoform 2 of Thrombospondin-1 OS=Homo sapiens OX=9606 GN=THBS1	3	6	6	6	1	1	2	1	0	0	0	0	2	3	3	4	0	0	0	0	3	1	3	2	0	0	0	0	0	1	1	2	0	0	0	0	0	0	0	0	0	0
P08059;CON__Q3ZBD7	P08059	25;11	25;11	16;6			sp|P08059|G6PI_PIG Glucose-6-phosphate isomerase OS=Sus scrofa OX=9823 GN=GPI PE=1 SV=3	2	25	25	16	15	15	18	18	15	16	19	18	14	17	18	18	16	16	16	18	17	16	17	17	15	19	17	18	15	17	16	19	19	19	19	21	17	20	20	18	15	19
P08069	P08069	2	2	2	Insulin-like growth factor 1 receptor;Insulin-like growth factor 1 receptor alpha chain;Insulin-like growth factor 1 receptor beta chain	IGF1R	sp|P08069|IGF1R_HUMAN Insulin-like growth factor 1 receptor OS=Homo sapiens OX=9606 GN=IGF1R PE=1 SV=1	1	2	2	2	0	0	0	1	0	0	0	0	0	0	1	0	0	0	0	0	0	0	0	1	0	0	0	1	0	0	0	1	0	0	0	1	0	0	0	0	0	0
P08132;P09525-2;P09525	P08132;P09525-2;P09525	3;2;2	2;2;2	2;2;2	Annexin A4	ANXA4	sp|P08132|ANXA4_PIG Annexin A4 OS=Sus scrofa OX=9823 GN=ANXA4 PE=1 SV=2;sp|P09525-2|ANXA4_HUMAN Isoform 2 of Annexin A4 OS=Homo sapiens OX=9606 GN=ANXA4;sp|P09525|ANXA4_HUMAN Annexin A4 OS=Homo sapiens OX=9606 GN=ANXA4 PE=1 SV=4	3	3	2	2	0	0	0	0	0	0	0	0	0	0	0	0	0	0	0	0	0	0	0	0	0	0	0	0	0	0	0	0	0	0	0	1	0	0	0	0	1	0
P08133-2;P08133	P08133-2;P08133	9;9	9;9	9;9	Annexin A6	ANXA6	sp|P08133-2|ANXA6_HUMAN Isoform 2 of Annexin A6 OS=Homo sapiens OX=9606 GN=ANXA6;sp|P08133|ANXA6_HUMAN Annexin A6 OS=Homo sapiens OX=9606 GN=ANXA6 PE=1 SV=3	2	9	9	9	7	6	5	6	7	5	4	6	5	5	4	4	6	6	5	6	6	6	5	7	7	7	5	5	7	6	6	4	6	2	8	6	6	6	5	4	6	6
P08134	P08134	7	7	2	Rho-related GTP-binding protein RhoC	RHOC	sp|P08134|RHOC_HUMAN Rho-related GTP-binding protein RhoC OS=Homo sapiens OX=9606 GN=RHOC PE=1 SV=1	1	7	7	2	3	2	3	2	4	4	2	3	3	2	2	4	3	4	3	2	4	3	4	1	4	3	4	3	3	2	1	2	4	4	3	3	4	6	5	2	3	4
P08138-2;P08138	P08138-2;P08138	7;7	7;7	7;7	Tumor necrosis factor receptor superfamily member 16	NGFR	sp|P08138-2|TNR16_HUMAN Isoform 2 of Tumor necrosis factor receptor superfamily member 16 OS=Homo sapiens OX=9606 GN=NGFR;sp|P08138|TNR16_HUMAN Tumor necrosis factor receptor superfamily member 16 OS=Homo sapiens OX=9606 GN=NGFR PE=1 SV=1	2	7	7	7	3	2	3	3	3	3	2	4	3	2	1	4	4	3	3	4	4	2	3	3	4	4	2	4	3	2	3	4	4	2	3	5	3	3	3	3	5	3
P08195-2;P08195-3;P08195;P08195-4	P08195-2;P08195-3;P08195;P08195-4	1;1;1;1	1;1;1;1	1;1;1;1	4F2 cell-surface antigen heavy chain	SLC3A2	sp|P08195-2|4F2_HUMAN Isoform 2 of 4F2 cell-surface antigen heavy chain OS=Homo sapiens OX=9606 GN=SLC3A2;sp|P08195-3|4F2_HUMAN Isoform 3 of 4F2 cell-surface antigen heavy chain OS=Homo sapiens OX=9606 GN=SLC3A2;sp|P08195|4F2_HUMAN 4F2 cell-surface antigen	4	1	1	1	0	0	1	1	0	1	1	1	1	1	1	0	0	1	1	1	0	1	1	1	0	1	1	1	1	1	1	1	0	1	1	1	1	0	1	1	1	0
P08237-2;P08237;P08237-3	P08237-2;P08237;P08237-3	19;19;19	2;2;2	2;2;2	ATP-dependent 6-phosphofructokinase, muscle type	PFKM	sp|P08237-2|PFKAM_HUMAN Isoform 2 of ATP-dependent 6-phosphofructokinase, muscle type OS=Homo sapiens OX=9606 GN=PFKM;sp|P08237|PFKAM_HUMAN ATP-dependent 6-phosphofructokinase, muscle type OS=Homo sapiens OX=9606 GN=PFKM PE=1 SV=2;sp|P08237-3|PFKAM_HUMAN I	3	19	2	2	10	17	10	15	14	13	15	13	16	14	15	14	13	16	13	13	16	14	13	12	14	17	14	14	17	15	13	14	18	14	14	16	16	16	13	12	13	14
P08238;Q58FF7	P08238	25;8	12;2	11;2	Heat shock protein HSP 90-beta	HSP90AB1	sp|P08238|HS90B_HUMAN Heat shock protein HSP 90-beta OS=Homo sapiens OX=9606 GN=HSP90AB1 PE=1 SV=4	2	25	12	11	16	18	18	19	17	17	18	17	18	17	18	16	15	19	17	17	19	18	18	17	17	18	17	15	19	17	17	17	19	19	19	20	16	17	19	20	16	15
P08240-2;P08240	P08240-2;P08240	6;6	6;6	6;6	Signal recognition particle receptor subunit alpha	SRPR	sp|P08240-2|SRPRA_HUMAN Isoform 2 of Signal recognition particle receptor subunit alpha OS=Homo sapiens OX=9606 GN=SRPRA;sp|P08240|SRPRA_HUMAN Signal recognition particle receptor subunit alpha OS=Homo sapiens OX=9606 GN=SRPRA PE=1 SV=2	2	6	6	6	1	2	2	2	2	1	2	1	1	1	0	1	0	1	2	1	2	1	1	1	1	3	2	1	1	1	2	1	2	2	2	3	1	3	2	2	3	2
P08243-3;P08243-2;P08243	P08243-3;P08243-2;P08243	3;3;3	3;3;3	3;3;3	Asparagine synthetase [glutamine-hydrolyzing]	ASNS	sp|P08243-3|ASNS_HUMAN Isoform 3 of Asparagine synthetase [glutamine-hydrolyzing] OS=Homo sapiens OX=9606 GN=ASNS;sp|P08243-2|ASNS_HUMAN Isoform 2 of Asparagine synthetase [glutamine-hydrolyzing] OS=Homo sapiens OX=9606 GN=ASNS;sp|P08243|ASNS_HUMAN Asparag	3	3	3	3	1	2	1	0	1	1	1	0	1	2	1	0	1	1	1	0	1	0	0	0	1	1	1	0	2	1	0	0	1	1	0	0	2	1	1	0	0	1
P08247;P08247-2	P08247;P08247-2	3;2	3;2	3;2	Synaptophysin	SYP	sp|P08247|SYPH_HUMAN Synaptophysin OS=Homo sapiens OX=9606 GN=SYP PE=1 SV=3;sp|P08247-2|SYPH_HUMAN Isoform 2 of Synaptophysin OS=Homo sapiens OX=9606 GN=SYP	2	3	3	3	1	1	1	1	1	1	1	1	1	1	1	1	1	2	1	2	1	1	1	1	1	1	1	1	2	2	1	1	1	1	1	1	1	1	1	1	1	1
P08552	P08552	15	1	1			sp|P08552|NFM_PIG Neurofilament medium polypeptide (Fragment) OS=Sus scrofa OX=9823 GN=NEFM PE=1 SV=2	1	15	1	1	9	7	7	8	9	8	10	9	6	6	7	10	7	9	9	10	8	9	6	8	8	6	10	9	8	8	7	10	9	9	9	11	8	6	8	8	9	8
P08572	P08572	1	1	1	Collagen alpha-2(IV) chain;Canstatin	COL4A2	sp|P08572|CO4A2_HUMAN Collagen alpha-2(IV) chain OS=Homo sapiens OX=9606 GN=COL4A2 PE=1 SV=4	1	1	1	1	0	0	0	0	0	0	0	0	0	0	0	0	0	0	1	0	0	0	0	1	0	0	0	0	0	0	1	0	0	0	0	1	0	0	0	0	0	0
P08574	P08574	5	5	5	Cytochrome c1, heme protein, mitochondrial	CYC1	sp|P08574|CY1_HUMAN Cytochrome c1, heme protein, mitochondrial OS=Homo sapiens OX=9606 GN=CYC1 PE=1 SV=3	1	5	5	5	3	3	4	4	1	3	3	4	2	3	3	4	2	3	4	2	3	4	4	2	2	3	4	3	3	4	3	3	4	3	5	4	3	3	4	3	3	2
P08575-4;P08575-9;P08575-10;P08575-8;P08575-7;P08575-5;P08575-6;P08575	P08575-4;P08575-9;P08575-10;P08575-8;P08575-7;P08575-5;P08575-6;P08575	2;2;2;2;2;2;2;2	2;2;2;2;2;2;2;2	2;2;2;2;2;2;2;2	Receptor-type tyrosine-protein phosphatase C	PTPRC	sp|P08575-4|PTPRC_HUMAN Isoform 2 of Receptor-type tyrosine-protein phosphatase C OS=Homo sapiens OX=9606 GN=PTPRC;sp|P08575-9|PTPRC_HUMAN Isoform 7 of Receptor-type tyrosine-protein phosphatase C OS=Homo sapiens OX=9606 GN=PTPRC;sp|P08575-10|PTPRC_HUMAN I	8	2	2	2	0	0	0	0	0	0	0	0	0	0	0	0	0	0	0	0	0	1	0	0	0	0	0	0	0	0	0	0	0	0	0	0	0	0	0	0	0	0
P08579	P08579	3	2	2	U2 small nuclear ribonucleoprotein B	SNRPB2	sp|P08579|RU2B_HUMAN U2 small nuclear ribonucleoprotein B OS=Homo sapiens OX=9606 GN=SNRPB2 PE=1 SV=1	1	3	2	2	2	1	1	2	2	2	2	2	2	2	1	2	2	2	2	3	2	1	2	2	2	1	1	1	1	2	3	3	2	1	2	2	2	1	2	2	2	2
P08621-3;P08621-2;P08621	P08621-3;P08621-2;P08621	4;4;4	4;4;4	4;4;4	U1 small nuclear ribonucleoprotein 70 kDa	SNRNP70	sp|P08621-3|RU17_HUMAN Isoform 3 of U1 small nuclear ribonucleoprotein 70 kDa OS=Homo sapiens OX=9606 GN=SNRNP70;sp|P08621-2|RU17_HUMAN Isoform 2 of U1 small nuclear ribonucleoprotein 70 kDa OS=Homo sapiens OX=9606 GN=SNRNP70;sp|P08621|RU17_HUMAN U1 small	3	4	4	4	3	2	2	2	1	1	1	2	3	1	2	2	3	2	1	1	2	2	0	2	2	1	1	3	3	2	1	2	2	2	1	3	1	3	2	2	3	1
Q6QAP7;P08708	Q6QAP7;P08708	5;5	5;5	5;5	40S ribosomal protein S17	RPS17	sp|Q6QAP7|RS17_PIG 40S ribosomal protein S17 OS=Sus scrofa OX=9823 GN=RPS17 PE=1 SV=3;sp|P08708|RS17_HUMAN 40S ribosomal protein S17 OS=Homo sapiens OX=9606 GN=RPS17 PE=1 SV=2	2	5	5	5	2	2	3	0	2	3	2	3	4	1	2	1	2	1	3	2	2	2	2	2	3	2	2	1	3	2	2	1	3	3	2	3	3	3	2	1	2	2
P08758	P08758	12	12	11	Annexin A5	ANXA5	sp|P08758|ANXA5_HUMAN Annexin A5 OS=Homo sapiens OX=9606 GN=ANXA5 PE=1 SV=2	1	12	12	11	9	8	7	7	8	9	5	7	8	9	9	8	6	8	7	7	9	10	8	6	8	10	7	9	7	9	7	8	7	8	8	8	10	9	10	8	8	10
P08835	P08835	46	46	34			sp|P08835|ALBU_PIG Albumin OS=Sus scrofa OX=9823 GN=ALB PE=1 SV=2	1	46	46	34	29	30	30	30	32	35	35	34	21	25	22	23	26	29	28	30	26	29	26	28	24	25	22	27	26	21	23	27	32	29	32	33	33	32	31	35	34	33
Q4GWZ2;P08865	Q4GWZ2;P08865	10;10	10;10	10;10	40S ribosomal protein SA	RPSA	sp|Q4GWZ2|RSSA_PIG 40S ribosomal protein SA OS=Sus scrofa OX=9823 GN=RPSA PE=1 SV=3;sp|P08865|RSSA_HUMAN 40S ribosomal protein SA OS=Homo sapiens OX=9606 GN=RPSA PE=1 SV=4	2	10	10	10	5	4	4	6	5	5	5	5	5	4	7	5	5	4	5	5	6	5	7	6	6	5	5	5	6	4	6	5	7	5	5	8	6	5	5	5	6	4
P09001	P09001	1	1	1	39S ribosomal protein L3, mitochondrial	MRPL3	sp|P09001|RM03_HUMAN 39S ribosomal protein L3, mitochondrial OS=Homo sapiens OX=9606 GN=MRPL3 PE=1 SV=1	1	1	1	1	1	0	1	0	0	0	0	0	0	0	0	0	0	0	0	0	1	0	0	0	0	0	0	0	1	0	0	0	0	0	0	0	1	0	0	0	1	0
Q5IS69;P09038-2;P09038-3;P09038-1;P09038	Q5IS69;P09038-2;P09038-3;P09038-1;P09038	2;2;2;2;2	2;2;2;2;2	2;2;2;2;2	Fibroblast growth factor 2	FGF2	sp|Q5IS69|FGF2_PANTR Fibroblast growth factor 2 OS=Pan troglodytes OX=9598 GN=FGF2 PE=2 SV=2;sp|P09038-2|FGF2_HUMAN Isoform 3 of Fibroblast growth factor 2 OS=Homo sapiens OX=9606 GN=FGF2;sp|P09038-3|FGF2_HUMAN Isoform 4 of Fibroblast growth factor 2 OS=Ho	5	2	2	2	0	0	0	0	0	1	0	1	1	0	0	1	1	0	0	0	0	2	0	0	0	2	0	0	1	1	0	0	0	2	0	0	0	1	0	0	0	1
P09104;P09104-2	P09104;P09104-2	18;16	14;13	13;12	Gamma-enolase	ENO2	sp|P09104|ENOG_HUMAN Gamma-enolase OS=Homo sapiens OX=9606 GN=ENO2 PE=1 SV=3;sp|P09104-2|ENOG_HUMAN Isoform 2 of Gamma-enolase OS=Homo sapiens OX=9606 GN=ENO2	2	18	14	13	13	14	14	15	14	15	15	15	14	14	14	13	14	15	15	15	13	15	15	14	14	16	14	16	14	15	14	14	15	15	16	15	14	14	14	13	14	17
P09110;P09110-2	P09110;P09110-2	5;4	5;4	5;4	3-ketoacyl-CoA thiolase, peroxisomal	ACAA1	sp|P09110|THIK_HUMAN 3-ketoacyl-CoA thiolase, peroxisomal OS=Homo sapiens OX=9606 GN=ACAA1 PE=1 SV=2;sp|P09110-2|THIK_HUMAN Isoform 2 of 3-ketoacyl-CoA thiolase, peroxisomal OS=Homo sapiens OX=9606 GN=ACAA1	2	5	5	5	2	3	2	2	2	3	2	2	2	3	2	3	2	3	3	1	2	3	3	2	1	3	3	1	2	2	3	2	3	3	2	3	1	2	3	2	2	3
P09132;P09132-2	P09132;P09132-2	2;1	2;1	2;1	Signal recognition particle 19 kDa protein	SRP19	sp|P09132|SRP19_HUMAN Signal recognition particle 19 kDa protein OS=Homo sapiens OX=9606 GN=SRP19 PE=1 SV=3;sp|P09132-2|SRP19_HUMAN Isoform 2 of Signal recognition particle 19 kDa protein OS=Homo sapiens OX=9606 GN=SRP19	2	2	2	2	0	2	1	1	0	1	2	1	1	1	0	2	0	2	1	1	0	1	2	1	0	1	1	2	2	0	2	1	1	0	1	2	0	1	2	1	0	0
P09234	P09234	2	2	2	U1 small nuclear ribonucleoprotein C	SNRPC	sp|P09234|RU1C_HUMAN U1 small nuclear ribonucleoprotein C OS=Homo sapiens OX=9606 GN=SNRPC PE=1 SV=1	1	2	2	2	2	2	2	2	2	2	2	2	2	2	2	2	1	2	2	2	2	2	2	2	2	2	2	2	2	2	2	2	2	2	2	2	2	2	2	2	2	2
P09429;B2RPK0	P09429	11;5	11;5	2;0	High mobility group protein B1	HMGB1	sp|P09429|HMGB1_HUMAN High mobility group protein B1 OS=Homo sapiens OX=9606 GN=HMGB1 PE=1 SV=3	2	11	11	2	4	6	6	6	6	7	6	7	5	5	6	7	5	7	7	8	5	7	6	7	6	7	7	7	6	6	7	8	6	7	7	7	6	6	6	7	6	7
P09455;P09455-2;P09455-3	P09455;P09455-2;P09455-3	5;3;3	5;3;3	5;3;3	Retinol-binding protein 1	RBP1	sp|P09455|RET1_HUMAN Retinol-binding protein 1 OS=Homo sapiens OX=9606 GN=RBP1 PE=1 SV=2;sp|P09455-2|RET1_HUMAN Isoform 2 of Retinol-binding protein 1 OS=Homo sapiens OX=9606 GN=RBP1;sp|P09455-3|RET1_HUMAN Isoform 3 of Retinol-binding protein 1 OS=Homo sap	3	5	5	5	1	1	2	3	1	1	2	2	1	1	1	2	1	1	2	2	2	1	1	1	1	1	1	2	1	1	3	2	1	2	2	2	2	1	1	2	2	1
P09471;P09471-2	P09471;P09471-2	12;11	11;10	10;9	Guanine nucleotide-binding protein G(o) subunit alpha	GNAO1	sp|P09471|GNAO_HUMAN Guanine nucleotide-binding protein G(o) subunit alpha OS=Homo sapiens OX=9606 GN=GNAO1 PE=1 SV=4;sp|P09471-2|GNAO_HUMAN Isoform Alpha-2 of Guanine nucleotide-binding protein G(o) subunit alpha OS=Homo sapiens OX=9606 GN=GNAO1	2	12	11	10	8	11	9	9	9	10	8	11	7	8	11	9	8	11	9	10	11	9	8	8	8	10	9	10	10	9	10	11	10	10	11	11	7	10	8	9	7	11
P09488-2;Q03013-2;Q03013;P09488;Q03013-3;P28161-2;P46439;P28161	P09488-2;Q03013-2;Q03013;P09488;Q03013-3;P28161-2;P46439;P28161	2;2;2;2;1;1;1;1	2;2;2;2;1;1;1;1	2;2;2;2;1;1;1;1	Glutathione S-transferase Mu 1;Glutathione S-transferase Mu 4;Glutathione S-transferase Mu 2;Glutathione S-transferase Mu 5	GSTM1;GSTM4;GSTM2;GSTM5	sp|P09488-2|GSTM1_HUMAN Isoform 2 of Glutathione S-transferase Mu 1 OS=Homo sapiens OX=9606 GN=GSTM1;sp|Q03013-2|GSTM4_HUMAN Isoform 2 of Glutathione S-transferase Mu 4 OS=Homo sapiens OX=9606 GN=GSTM4;sp|Q03013|GSTM4_HUMAN Glutathione S-transferase Mu 4 O	8	2	2	2	2	2	2	2	2	2	2	2	2	2	2	2	1	1	1	0	1	0	2	0	2	2	2	2	2	2	2	2	2	1	1	2	2	1	2	2	2	2
P09493-10;P42639;P09493-6;P09493-4;P09493;P09493-2;P09493-9;P09493-8;P09493-7;P09493-3	P09493-10;P42639;P09493-6;P09493-4;P09493;P09493-2;P09493-9;P09493-8;P09493-7;P09493-3	6;5;5;5;5;4;4;4;4;4	4;3;3;3;3;2;2;2;2;2	2;1;1;1;1;0;0;0;0;0	Tropomyosin alpha-1 chain	TPM1	sp|P09493-10|TPM1_HUMAN Isoform 10 of Tropomyosin alpha-1 chain OS=Homo sapiens OX=9606 GN=TPM1;sp|P42639|TPM1_PIG Tropomyosin alpha-1 chain OS=Sus scrofa OX=9823 GN=TPM1 PE=1 SV=2;sp|P09493-6|TPM1_HUMAN Isoform 6 of Tropomyosin alpha-1 chain OS=Homo sapie	10	6	4	2	3	3	2	4	4	3	3	4	1	2	2	1	2	3	3	4	2	3	3	4	4	1	4	2	5	3	3	4	4	2	4	4	3	2	2	3	2	4
P09493-5	P09493-5	5	1	1	Tropomyosin alpha-1 chain	TPM1	sp|P09493-5|TPM1_HUMAN Isoform 5 of Tropomyosin alpha-1 chain OS=Homo sapiens OX=9606 GN=TPM1	1	5	1	1	2	2	3	3	3	2	3	3	1	3	2	0	2	2	3	3	2	2	2	3	3	2	4	1	4	3	3	4	4	2	2	4	2	1	1	1	1	3
P09496-2;P09496-4;P09496-3;P09496;P09496-5	P09496-2;P09496-4;P09496-3;P09496;P09496-5	3;3;3;3;2	3;3;3;3;2	3;3;3;3;2	Clathrin light chain A	CLTA	sp|P09496-2|CLCA_HUMAN Isoform Non-brain of Clathrin light chain A OS=Homo sapiens OX=9606 GN=CLTA;sp|P09496-4|CLCA_HUMAN Isoform 4 of Clathrin light chain A OS=Homo sapiens OX=9606 GN=CLTA;sp|P09496-3|CLCA_HUMAN Isoform 3 of Clathrin light chain A OS=Homo	5	3	3	3	0	0	0	1	1	1	0	0	0	1	0	0	0	1	1	1	0	1	1	1	0	1	1	2	2	1	1	2	0	1	2	2	0	1	0	2	0	2
P09497;P09497-2	P09497;P09497-2	2;1	2;1	2;1	Clathrin light chain B	CLTB	sp|P09497|CLCB_HUMAN Clathrin light chain B OS=Homo sapiens OX=9606 GN=CLTB PE=1 SV=1;sp|P09497-2|CLCB_HUMAN Isoform Non-brain of Clathrin light chain B OS=Homo sapiens OX=9606 GN=CLTB	2	2	2	2	1	1	0	1	1	1	0	0	1	1	1	1	2	1	1	0	0	2	1	1	0	1	1	0	1	1	2	1	1	1	1	2	1	1	2	1	1	1
P09571;P02788-2;P02788;P02787	P09571	38;2;2;1	38;2;2;1	32;0;0;1			sp|P09571|TRFE_PIG Serotransferrin OS=Sus scrofa OX=9823 GN=TF PE=1 SV=2	4	38	38	32	19	18	20	20	22	24	23	25	14	15	14	13	15	19	17	20	15	15	15	16	13	14	13	16	13	13	15	19	21	20	24	23	19	24	23	21	23	28
P09601	P09601	1	1	1	Heme oxygenase 1	HMOX1	sp|P09601|HMOX1_HUMAN Heme oxygenase 1 OS=Homo sapiens OX=9606 GN=HMOX1 PE=1 SV=1	1	1	1	1	0	0	0	0	0	0	0	0	0	0	0	0	0	0	0	0	0	0	0	0	0	0	0	0	0	0	0	0	0	0	0	0	0	0	0	0	0	0
P09623;P09622-3;P09622;P09622-2	P09623;P09622-3;P09622	11;6;6;4	11;6;6;4	11;6;6;4	Dihydrolipoyl dehydrogenase, mitochondrial	DLD	sp|P09623|DLDH_PIG Dihydrolipoyl dehydrogenase, mitochondrial OS=Sus scrofa OX=9823 GN=DLD PE=1 SV=1;sp|P09622-3|DLDH_HUMAN Isoform 3 of Dihydrolipoyl dehydrogenase, mitochondrial OS=Homo sapiens OX=9606 GN=DLD;sp|P09622|DLDH_HUMAN Dihydrolipoyl dehydrogen	4	11	11	11	7	7	7	7	6	8	7	5	7	7	4	6	7	7	7	5	7	7	7	5	7	7	7	5	8	9	7	7	6	8	7	8	7	7	7	7	8	8
P09651;P09651-3;Q32P51	P09651;P09651-3;Q32P51	12;11;10	12;11;10	1;0;0	Heterogeneous nuclear ribonucleoprotein A1;Heterogeneous nuclear ribonucleoprotein A1, N-terminally processed;Heterogeneous nuclear ribonucleoprotein A1-like 2	HNRNPA1;HNRNPA1L2	sp|P09651|ROA1_HUMAN Heterogeneous nuclear ribonucleoprotein A1 OS=Homo sapiens OX=9606 GN=HNRNPA1 PE=1 SV=5;sp|P09651-3|ROA1_HUMAN Isoform 2 of Heterogeneous nuclear ribonucleoprotein A1 OS=Homo sapiens OX=9606 GN=HNRNPA1;sp|Q32P51|RA1L2_HUMAN Heterogeneo	3	12	12	1	5	6	6	7	6	7	5	5	5	5	4	4	6	5	4	5	6	5	4	5	5	5	4	5	6	6	5	5	8	5	7	8	6	5	7	3	10	8
P09651-2	P09651-2	12	1	1	Heterogeneous nuclear ribonucleoprotein A1;Heterogeneous nuclear ribonucleoprotein A1, N-terminally processed	HNRNPA1	sp|P09651-2|ROA1_HUMAN Isoform A1-A of Heterogeneous nuclear ribonucleoprotein A1 OS=Homo sapiens OX=9606 GN=HNRNPA1	1	12	1	1	5	6	6	7	6	7	5	5	5	5	4	4	6	5	4	5	6	5	4	5	5	5	4	5	6	6	5	5	7	5	7	8	6	5	7	3	9	7
P09661	P09661	5	5	5	U2 small nuclear ribonucleoprotein A	SNRPA1	sp|P09661|RU2A_HUMAN U2 small nuclear ribonucleoprotein A OS=Homo sapiens OX=9606 GN=SNRPA1 PE=1 SV=2	1	5	5	5	2	2	3	2	2	2	3	2	2	3	3	3	2	2	2	2	1	2	2	2	2	2	3	3	2	2	3	3	2	3	2	4	2	2	2	2	2	2
P09874	P09874	19	19	19	Poly [ADP-ribose] polymerase 1	PARP1	sp|P09874|PARP1_HUMAN Poly [ADP-ribose] polymerase 1 OS=Homo sapiens OX=9606 GN=PARP1 PE=1 SV=4	1	19	19	19	10	10	8	5	9	9	7	6	10	7	5	6	7	9	6	5	9	6	5	5	7	8	6	6	12	11	8	7	11	9	10	10	7	8	7	5	8	6
P09960-4;P09960;P09960-3;P09960-2	P09960-4;P09960;P09960-3;P09960-2	5;5;4;4	5;5;4;4	5;5;4;4	Leukotriene A-4 hydrolase	LTA4H	sp|P09960-4|LKHA4_HUMAN Isoform 4 of Leukotriene A-4 hydrolase OS=Homo sapiens OX=9606 GN=LTA4H;sp|P09960|LKHA4_HUMAN Leukotriene A-4 hydrolase OS=Homo sapiens OX=9606 GN=LTA4H PE=1 SV=2;sp|P09960-3|LKHA4_HUMAN Isoform 3 of Leukotriene A-4 hydrolase OS=Hom	4	5	5	5	3	4	3	3	3	4	2	3	3	3	3	2	4	4	4	4	3	3	3	4	3	4	3	3	4	4	4	3	4	4	2	4	4	3	4	4	4	3
P09972;P05062	P09972	17;1	17;1	14;0	Fructose-bisphosphate aldolase C	ALDOC	sp|P09972|ALDOC_HUMAN Fructose-bisphosphate aldolase C OS=Homo sapiens OX=9606 GN=ALDOC PE=1 SV=2	2	17	17	14	9	11	9	9	11	10	10	10	6	10	8	12	11	8	9	11	11	10	11	10	8	9	10	10	11	11	11	12	10	11	11	13	9	11	9	11	10	8
P0C0L4-2;P0C0L5;P0C0L4	P0C0L4-2;P0C0L5;P0C0L4	1;1;1	1;1;1	1;1;1	Complement C4-A;Complement C4 beta chain;Complement C4-A alpha chain;C4a anaphylatoxin;C4b-A;C4d-A;Complement C4 gamma chain;Complement C4-B;Complement C4 beta chain;Complement C4-B alpha chain;C4a anaphylatoxin;C4b-B;C4d-B;Complement C4 gamma chain	C4A;C4B	sp|P0C0L4-2|CO4A_HUMAN Isoform 2 of Complement C4-A OS=Homo sapiens OX=9606 GN=C4A;sp|P0C0L5|CO4B_HUMAN Complement C4-B OS=Homo sapiens OX=9606 GN=C4B PE=1 SV=2;sp|P0C0L4|CO4A_HUMAN Complement C4-A OS=Homo sapiens OX=9606 GN=C4A PE=1 SV=2	3	1	1	1	0	0	0	0	0	0	0	1	0	0	0	0	0	0	0	0	0	0	0	0	0	0	0	0	0	0	0	0	0	0	0	0	0	0	0	0	0	0
Q71UI9;P0C0S5;Q71UI9-4;Q71UI9-2;Q71UI9-3;Q71UI9-5	Q71UI9;P0C0S5;Q71UI9-4;Q71UI9-2;Q71UI9-3	6;6;5;5;4;1	4;4;4;3;3;0	4;4;4;3;3;0	Histone H2A.V;Histone H2A.Z	H2AFV;H2AFZ	sp|Q71UI9|H2AV_HUMAN Histone H2A.V OS=Homo sapiens OX=9606 GN=H2AZ2 PE=1 SV=3;sp|P0C0S5|H2AZ_HUMAN Histone H2A.Z OS=Homo sapiens OX=9606 GN=H2AZ1 PE=1 SV=2;sp|Q71UI9-4|H2AV_HUMAN Isoform 4 of Histone H2A.V OS=Homo sapiens OX=9606 GN=H2AZ2;sp|Q71UI9-2|H2AV_	6	6	4	4	5	4	4	4	4	4	5	4	5	3	4	5	3	4	5	4	4	5	5	4	3	4	4	3	5	3	5	4	5	4	5	5	2	4	5	5	4	4
Q99878;Q96KK5;P0C0S8;Q9BTM1;P20671;Q9BTM1-2;REV__Q8NB25-4;REV__Q8NB25-2;REV__Q8NB25-3;REV__Q8NB25	Q99878;Q96KK5;P0C0S8;Q9BTM1;P20671;Q9BTM1-2	11;11;11;10;10;8;1;1;1;1	11;11;11;10;10;8;1;1;1;1	0;0;0;0;0;0;0;0;0;0	Histone H2A type 1-J;Histone H2A type 1-H;Histone H2A type 1;Histone H2A.J;Histone H2A type 1-D	HIST1H2AJ;HIST1H2AH;HIST1H2AG;H2AFJ;HIST1H2AD	sp|Q99878|H2A1J_HUMAN Histone H2A type 1-J OS=Homo sapiens OX=9606 GN=H2AC14 PE=1 SV=3;sp|Q96KK5|H2A1H_HUMAN Histone H2A type 1-H OS=Homo sapiens OX=9606 GN=H2AC12 PE=1 SV=3;sp|P0C0S8|H2A1_HUMAN Histone H2A type 1 OS=Homo sapiens OX=9606 GN=H2AC11 PE=1 SV=	10	11	11	0	4	6	4	5	5	5	4	5	5	6	5	6	5	5	3	4	5	7	4	3	5	5	4	4	4	5	5	5	7	7	7	6	6	7	6	5	7	8
P0C2C3;Q969Z3;Q969Z3-2	P0C2C3;Q969Z3;Q969Z3-2	2;2;1	2;2;1	2;2;1	Mitochondrial amidoxime reducing component 2	MARC2	sp|P0C2C3|MARC2_PIG Mitochondrial amidoxime reducing component 2 (Fragments) OS=Sus scrofa OX=9823 GN=MTARC2 PE=1 SV=1;sp|Q969Z3|MARC2_HUMAN Mitochondrial amidoxime reducing component 2 OS=Homo sapiens OX=9606 GN=MTARC2 PE=1 SV=1;sp|Q969Z3-2|MARC2_HUMAN Is	3	2	2	2	0	1	0	1	0	0	1	0	0	0	0	0	0	1	0	1	0	1	1	0	0	1	0	0	0	1	1	1	1	1	1	1	0	1	0	1	0	1
P0C5I2;Q9Y5P6;Q9Y5P6-2	P0C5I2	5;2;2	5;2;2	5;2;2			sp|P0C5I2|GMPPB_PIG Mannose-1-phosphate guanyltransferase beta OS=Sus scrofa OX=9823 GN=GMPPB PE=1 SV=1	3	5	5	5	1	1	2	2	1	0	3	1	2	2	1	1	3	3	2	1	2	2	1	3	2	3	2	3	2	2	2	1	1	0	1	2	2	2	1	1	2	2
Q5R3F8;P0C7U0	Q5R3F8;P0C7U0	1;1	1;1	1;1	Protein phosphatase 1 regulatory subunit 29;Protein ELFN1	ELFN2;ELFN1	sp|Q5R3F8|PPR29_HUMAN Protein phosphatase 1 regulatory subunit 29 OS=Homo sapiens OX=9606 GN=ELFN2 PE=1 SV=1;sp|P0C7U0|ELFN1_HUMAN Protein ELFN1 OS=Homo sapiens OX=9606 GN=ELFN1 PE=1 SV=2	2	1	1	1	0	0	0	0	1	1	0	1	0	0	0	0	1	1	1	1	1	1	0	0	1	0	0	0	1	1	0	1	0	1	1	1	0	1	1	1	0	0
P0C8B5	P0C8B5	3	3	3			sp|P0C8B5|GON7_PIG EKC/KEOPS complex subunit GON7 OS=Sus scrofa OX=9823 GN=GON7 PE=3 SV=1	1	3	3	3	1	1	1	1	0	1	0	1	2	2	0	0	1	1	1	1	0	1	1	1	0	1	1	1	1	1	1	1	1	1	0	0	0	1	2	1	1	1
P0DN76;Q01081-2;Q01081;Q29350;Q01081-3;Q8WU68-3;Q8WU68-2;Q8WU68;Q01081-4	P0DN76;Q01081-2;Q01081;Q29350;Q01081-3;Q8WU68-3;Q8WU68-2;Q8WU68	3;3;3;2;2;2;2;2;1	3;3;3;2;2;2;2;2;1	3;3;3;2;2;2;2;2;1	Splicing factor U2AF 35 kDa subunit;Splicing factor U2AF 26 kDa subunit	U2AF1;U2AF1L4	sp|P0DN76|U2AF5_HUMAN Splicing factor U2AF 35 kDa subunit-like protein OS=Homo sapiens OX=9606 GN=U2AF1L5 PE=1 SV=1;sp|Q01081-2|U2AF1_HUMAN Isoform 2 of Splicing factor U2AF 35 kDa subunit OS=Homo sapiens OX=9606 GN=U2AF1;sp|Q01081|U2AF1_HUMAN Splicing fac	9	3	3	3	1	2	1	1	1	1	2	2	2	1	0	1	1	1	1	1	1	2	1	1	1	2	1	2	1	1	2	2	1	1	2	1	1	1	1	1	1	1
P0DP25;P0DP24;P0DP23	P0DP25;P0DP24;P0DP23	9;9;9	9;9;9	9;9;9			sp|P0DP25|CALM3_HUMAN Calmodulin-3 OS=Homo sapiens OX=9606 GN=CALM3 PE=1 SV=1;sp|P0DP24|CALM2_HUMAN Calmodulin-2 OS=Homo sapiens OX=9606 GN=CALM2 PE=1 SV=1;sp|P0DP23|CALM1_HUMAN Calmodulin-1 OS=Homo sapiens OX=9606 GN=CALM1 PE=1 SV=1	3	9	9	9	5	4	5	5	5	5	6	4	4	5	4	4	4	5	6	5	4	4	4	4	4	5	5	4	5	5	5	5	5	5	6	5	5	5	4	6	5	5
P0DPH8;P0DPH7;P0DPH7-2;Q6PEY2	P0DPH8;P0DPH7;P0DPH7-2;Q6PEY2	21;21;18;18	1;1;1;1	1;1;1;1	Tubulin alpha-3E chain	TUBA3E	sp|P0DPH8|TBA3D_HUMAN Tubulin alpha-3D chain OS=Homo sapiens OX=9606 GN=TUBA3D PE=1 SV=1;sp|P0DPH7|TBA3C_HUMAN Tubulin alpha-3C chain OS=Homo sapiens OX=9606 GN=TUBA3C PE=1 SV=1;sp|P0DPH7-2|TBA3C_HUMAN Isoform 2 of Tubulin alpha-3C chain OS=Homo sapiens OX	4	21	1	1	16	17	15	15	17	16	17	16	17	17	16	16	16	16	15	16	16	17	16	15	16	15	15	15	17	17	17	17	19	19	19	20	19	20	18	18	19	20
P0DTA4	P0DTA4	11	11	8			sp|P0DTA4|PCCA_PIG Propionyl-CoA carboxylase alpha chain, mitochondrial OS=Sus scrofa OX=9823 GN=PCCA PE=1 SV=1	1	11	11	8	3	2	2	2	4	0	1	1	2	0	3	2	2	4	2	4	2	1	1	3	3	2	3	3	3	2	1	1	2	4	1	2	2	2	2	4	4	1
P10155;P10155-3;P10155-5;P10155-4;P10155-2	P10155;P10155-3;P10155-5;P10155-4	7;6;6;6;1	7;6;6;6;1	7;6;6;6;1	60 kDa SS-A/Ro ribonucleoprotein	TROVE2	sp|P10155|RO60_HUMAN 60 kDa SS-A/Ro ribonucleoprotein OS=Homo sapiens OX=9606 GN=RO60 PE=1 SV=2;sp|P10155-3|RO60_HUMAN Isoform 3 of 60 kDa SS-A/Ro ribonucleoprotein OS=Homo sapiens OX=9606 GN=RO60;sp|P10155-5|RO60_HUMAN Isoform 5 of 60 kDa SS-A/Ro ribonucl	5	7	7	7	5	3	3	5	4	2	3	5	3	4	3	2	4	3	3	5	4	3	2	6	4	4	4	6	4	3	5	5	3	2	5	5	5	4	3	4	6	4
P10173-2;P10173;P07954-2;P07954	P10173-2;P10173;P07954-2;P07954	15;15;11;11	15;15;11;11	15;15;11;11	Fumarate hydratase, mitochondrial	FH	sp|P10173-2|FUMH_PIG Isoform Cytoplasmic of Fumarate hydratase, mitochondrial OS=Sus scrofa OX=9823 GN=FH;sp|P10173|FUMH_PIG Fumarate hydratase, mitochondrial OS=Sus scrofa OX=9823 GN=FH PE=1 SV=2;sp|P07954-2|FUMH_HUMAN Isoform Cytoplasmic of Fumarate hydr	4	15	15	15	9	11	9	10	7	11	9	11	8	9	9	11	9	9	11	11	10	11	11	10	10	10	10	12	10	8	10	11	10	10	8	11	9	11	9	9	7	11
P10301	P10301	2	2	1	Ras-related protein R-Ras	RRAS	sp|P10301|RRAS_HUMAN Ras-related protein R-Ras OS=Homo sapiens OX=9606 GN=RRAS PE=1 SV=1	1	2	2	1	1	2	2	1	1	2	0	2	1	1	1	0	1	2	1	2	1	2	2	1	1	2	1	1	2	2	2	2	1	1	2	2	1	1	2	1	1	1
P10412;P16402	P10412;P16402	7;5	7;5	2;0	Histone H1.4;Histone H1.3	HIST1H1E;HIST1H1D	sp|P10412|H14_HUMAN Histone H1.4 OS=Homo sapiens OX=9606 GN=H1-4 PE=1 SV=2;sp|P16402|H13_HUMAN Histone H1.3 OS=Homo sapiens OX=9606 GN=H1-3 PE=1 SV=2	2	7	7	2	4	4	4	4	3	4	4	4	3	3	4	4	4	3	4	3	4	4	4	4	3	3	4	4	4	3	4	5	4	4	4	4	3	4	4	4	3	5
P10515	P10515	7	7	7	Dihydrolipoyllysine-residue acetyltransferase component of pyruvate dehydrogenase complex, mitochondrial	DLAT	sp|P10515|ODP2_HUMAN Dihydrolipoyllysine-residue acetyltransferase component of pyruvate dehydrogenase complex, mitochondrial OS=Homo sapiens OX=9606 GN=DLAT PE=1 SV=3	1	7	7	7	6	6	5	4	6	6	5	4	6	6	5	6	6	5	6	5	6	6	5	6	6	5	5	5	6	6	5	6	6	5	5	7	6	5	4	3	6	6
P10523	P10523	3	1	1	S-arrestin	SAG	sp|P10523|ARRS_HUMAN S-arrestin OS=Homo sapiens OX=9606 GN=SAG PE=1 SV=3	1	3	1	1	3	3	3	3	3	3	3	3	3	3	2	2	3	3	2	3	3	3	3	3	3	2	3	3	3	3	2	3	3	3	3	3	2	3	3	3	3	3
P10586-2;P10586	P10586-2;P10586	8;8	7;7	7;7	Receptor-type tyrosine-protein phosphatase F	PTPRF	sp|P10586-2|PTPRF_HUMAN Isoform 2 of Receptor-type tyrosine-protein phosphatase F OS=Homo sapiens OX=9606 GN=PTPRF;sp|P10586|PTPRF_HUMAN Receptor-type tyrosine-protein phosphatase F OS=Homo sapiens OX=9606 GN=PTPRF PE=1 SV=2	2	8	7	7	0	1	2	1	1	3	1	1	1	1	1	0	4	2	3	1	1	1	0	2	3	3	2	1	1	1	0	1	1	1	1	2	1	1	2	0	1	1
P10636-6;P10636-7;P10636-8;P10636;P10636-9	P10636-6;P10636-7;P10636-8;P10636;P10636-9	3;3;3;3;3	3;3;3;3;3	1;1;1;1;1	Microtubule-associated protein tau	MAPT	sp|P10636-6|TAU_HUMAN Isoform Tau-D of Microtubule-associated protein tau OS=Homo sapiens OX=9606 GN=MAPT;sp|P10636-7|TAU_HUMAN Isoform Tau-E of Microtubule-associated protein tau OS=Homo sapiens OX=9606 GN=MAPT;sp|P10636-8|TAU_HUMAN Isoform Tau-F of Micro	5	3	3	1	1	2	2	2	2	2	2	2	2	2	1	2	3	2	2	1	2	2	1	1	3	2	1	2	2	2	1	2	1	2	1	2	3	2	2	2	2	2
P10668;P23528	P10668;P23528	11;10	11;10	10;9	Cofilin-1	CFL1	sp|P10668|COF1_PIG Cofilin-1 OS=Sus scrofa OX=9823 GN=CFL1 PE=1 SV=3;sp|P23528|COF1_HUMAN Cofilin-1 OS=Homo sapiens OX=9606 GN=CFL1 PE=1 SV=3	2	11	11	10	4	8	5	7	4	6	7	8	6	6	8	7	5	8	5	7	5	6	8	7	5	7	8	7	6	7	6	8	7	7	8	8	5	7	6	6	6	8
P10745	P10745	7	7	7	Retinol-binding protein 3	RBP3	sp|P10745|RET3_HUMAN Retinol-binding protein 3 OS=Homo sapiens OX=9606 GN=RBP3 PE=1 SV=2	1	7	7	7	4	3	3	4	3	5	4	3	4	3	4	4	3	4	4	3	4	4	4	4	5	5	4	5	4	3	4	4	3	4	4	4	5	6	4	5	5	5
P10775	P10775	17	17	17			sp|P10775|RINI_PIG Ribonuclease inhibitor OS=Sus scrofa OX=9823 GN=RNH1 PE=1 SV=1	1	17	17	17	11	8	12	12	9	11	11	11	10	9	11	9	12	12	8	11	12	14	10	10	9	10	11	10	11	8	10	11	9	11	11	15	11	12	11	11	11	8
P10809;P10809-2	P10809	27;3	27;3	27;3	60 kDa heat shock protein, mitochondrial	HSPD1	sp|P10809|CH60_HUMAN 60 kDa heat shock protein, mitochondrial OS=Homo sapiens OX=9606 GN=HSPD1 PE=1 SV=2	2	27	27	27	19	20	21	20	18	19	19	18	18	21	17	18	20	21	21	19	17	20	20	19	19	20	19	20	20	22	18	18	20	20	23	23	19	19	22	20	18	20
P11021;P34935	P11021	27;4	26;4	26;4	78 kDa glucose-regulated protein	HSPA5	sp|P11021|BIP_HUMAN Endoplasmic reticulum chaperone BiP OS=Homo sapiens OX=9606 GN=HSPA5 PE=1 SV=2	2	27	26	26	18	19	18	20	19	18	19	21	18	18	19	18	19	17	19	20	19	17	21	20	18	18	19	21	19	18	18	21	21	18	20	21	21	21	18	21	21	20
P11047	P11047	9	9	9	Laminin subunit gamma-1	LAMC1	sp|P11047|LAMC1_HUMAN Laminin subunit gamma-1 OS=Homo sapiens OX=9606 GN=LAMC1 PE=1 SV=3	1	9	9	9	4	4	3	4	2	3	4	4	2	4	5	3	1	4	3	4	3	3	5	4	2	5	4	5	2	2	3	5	4	3	5	7	2	3	4	5	3	3
P11137-3;P11137;P11137-2;P11137-4	P11137-3;P11137	16;16;7;7	16;16;7;7	16;16;7;7	Microtubule-associated protein 2	MAP2	sp|P11137-3|MTAP2_HUMAN Isoform 3 of Microtubule-associated protein 2 OS=Homo sapiens OX=9606 GN=MAP2;sp|P11137|MTAP2_HUMAN Microtubule-associated protein 2 OS=Homo sapiens OX=9606 GN=MAP2 PE=1 SV=4	4	16	16	16	7	7	6	6	5	5	5	6	4	5	5	5	10	8	4	7	7	6	5	7	7	7	6	5	10	7	5	5	8	6	7	8	6	5	4	5	8	7
P11142;P11142-2	P11142;P11142-2	34;27	34;27	23;17	Heat shock cognate 71 kDa protein	HSPA8	sp|P11142|HSP7C_HUMAN Heat shock cognate 71 kDa protein OS=Homo sapiens OX=9606 GN=HSPA8 PE=1 SV=1;sp|P11142-2|HSP7C_HUMAN Isoform 2 of Heat shock cognate 71 kDa protein OS=Homo sapiens OX=9606 GN=HSPA8	2	34	34	23	22	21	23	24	24	23	23	23	22	22	23	19	22	23	23	24	23	23	24	23	23	22	22	21	22	20	23	25	26	23	24	26	21	26	27	22	24	28
P20303;P11166	P20303;P11166	7;7	7;7	7;7	Solute carrier family 2, facilitated glucose transporter member 1	SLC2A1	sp|P20303|GTR1_PIG Solute carrier family 2, facilitated glucose transporter member 1 OS=Sus scrofa OX=9823 GN=SLC2A1 PE=2 SV=2;sp|P11166|GTR1_HUMAN Solute carrier family 2, facilitated glucose transporter member 1 OS=Homo sapiens OX=9606 GN=SLC2A1 PE=1 SV=	2	7	7	7	6	5	3	5	6	5	5	4	6	5	6	5	7	5	5	5	5	5	5	5	4	4	4	5	6	6	5	5	6	5	5	5	5	6	5	5	5	4
P11171-6;P11171-4;P11171-3;P11171-5;P11171-2;P11171;P11171-7	P11171-6;P11171-4;P11171-3;P11171-5;P11171-2;P11171;P11171-7	5;5;5;5;5;5;4	4;4;4;4;4;4;3	4;4;4;4;4;4;3	Protein 4.1	EPB41	sp|P11171-6|EPB41_HUMAN Isoform 6 of Protein 4.1 OS=Homo sapiens OX=9606 GN=EPB41;sp|P11171-4|EPB41_HUMAN Isoform 4 of Protein 4.1 OS=Homo sapiens OX=9606 GN=EPB41;sp|P11171-3|EPB41_HUMAN Isoform 3 of Protein 4.1 OS=Homo sapiens OX=9606 GN=EPB41;sp|P11171-	7	5	4	4	1	1	2	2	2	2	3	3	3	2	2	3	2	2	2	2	1	2	2	3	3	3	2	3	2	1	4	2	3	2	2	3	1	1	2	2	1	2
P11172-2;P11172-3;P11172	P11172-2;P11172-3;P11172	2;2;2	2;2;2	2;2;2	Uridine 5-monophosphate synthase;Orotate phosphoribosyltransferase;Orotidine 5-phosphate decarboxylase	UMPS	sp|P11172-2|UMPS_HUMAN Isoform 2 of Uridine 5-monophosphate synthase OS=Homo sapiens OX=9606 GN=UMPS;sp|P11172-3|UMPS_HUMAN Isoform 3 of Uridine 5-monophosphate synthase OS=Homo sapiens OX=9606 GN=UMPS;sp|P11172|UMPS_HUMAN Uridine 5-monophosphate syntha	3	2	2	2	1	1	1	2	1	1	1	2	0	1	0	0	1	1	2	1	1	1	1	1	1	0	1	1	0	1	1	1	0	1	2	1	1	1	2	2	1	1
P11177;P11177-2;P11177-3	P11177;P11177-2;P11177-3	7;7;6	7;7;6	7;7;6	Pyruvate dehydrogenase E1 component subunit beta, mitochondrial	PDHB	sp|P11177|ODPB_HUMAN Pyruvate dehydrogenase E1 component subunit beta, mitochondrial OS=Homo sapiens OX=9606 GN=PDHB PE=1 SV=3;sp|P11177-2|ODPB_HUMAN Isoform 2 of Pyruvate dehydrogenase E1 component subunit beta, mitochondrial OS=Homo sapiens OX=9606 GN=PD	3	7	7	7	4	4	4	4	4	5	4	4	3	4	5	4	4	4	4	5	3	4	3	3	5	4	4	5	5	4	4	4	4	6	5	6	4	4	5	5	3	4
P11182	P11182	3	3	3	Lipoamide acyltransferase component of branched-chain alpha-keto acid dehydrogenase complex, mitochondrial	DBT	sp|P11182|ODB2_HUMAN Lipoamide acyltransferase component of branched-chain alpha-keto acid dehydrogenase complex, mitochondrial OS=Homo sapiens OX=9606 GN=DBT PE=1 SV=3	1	3	3	3	0	1	0	0	0	1	1	0	0	0	0	0	0	1	0	0	0	1	0	1	0	1	0	0	0	0	0	0	0	1	0	1	0	0	2	0	0	0
P11216	P11216	16	16	11	Glycogen phosphorylase, brain form	PYGB	sp|P11216|PYGB_HUMAN Glycogen phosphorylase, brain form OS=Homo sapiens OX=9606 GN=PYGB PE=1 SV=5	1	16	16	11	7	9	8	7	9	6	7	7	9	7	5	4	8	9	8	8	7	6	6	7	9	7	8	7	7	7	6	7	9	10	8	9	6	6	8	7	7	9
P11217;P11217-2	P11217;P11217-2	8;6	3;3	3;3	Glycogen phosphorylase, muscle form	PYGM	sp|P11217|PYGM_HUMAN Glycogen phosphorylase, muscle form OS=Homo sapiens OX=9606 GN=PYGM PE=1 SV=6;sp|P11217-2|PYGM_HUMAN Isoform 2 of Glycogen phosphorylase, muscle form OS=Homo sapiens OX=9606 GN=PYGM	2	8	3	3	3	5	2	1	2	3	3	3	3	3	1	2	3	3	2	2	1	3	1	2	4	2	2	2	2	3	3	2	2	4	4	4	2	2	4	2	2	4
P11233	P11233	4	1	1	Ras-related protein Ral-A	RALA	sp|P11233|RALA_HUMAN Ras-related protein Ral-A OS=Homo sapiens OX=9606 GN=RALA PE=1 SV=1	1	4	1	1	3	2	2	2	2	2	2	2	2	2	2	1	2	2	2	2	3	2	2	2	2	2	2	2	2	2	2	2	2	2	2	2	3	2	2	2	3	2
P11234;P11234-3;P11234-2	P11234;P11234-3;P11234-2	6;6;6	6;6;6	3;3;3	Ras-related protein Ral-B	RALB	sp|P11234|RALB_HUMAN Ras-related protein Ral-B OS=Homo sapiens OX=9606 GN=RALB PE=1 SV=1;sp|P11234-3|RALB_HUMAN Isoform 3 of Ras-related protein Ral-B OS=Homo sapiens OX=9606 GN=RALB;sp|P11234-2|RALB_HUMAN Isoform 2 of Ras-related protein Ral-B OS=Homo sap	3	6	6	3	2	3	2	3	3	3	2	2	3	2	3	2	2	3	2	3	4	3	3	3	3	2	2	3	3	3	2	3	3	2	3	4	3	3	2	2	4	3
P11274-2;P11274	P11274-2;P11274	3;3	3;3	3;3	Breakpoint cluster region protein	BCR	sp|P11274-2|BCR_HUMAN Isoform 2 of Breakpoint cluster region protein OS=Homo sapiens OX=9606 GN=BCR;sp|P11274|BCR_HUMAN Breakpoint cluster region protein OS=Homo sapiens OX=9606 GN=BCR PE=1 SV=2	2	3	3	3	1	0	0	0	1	0	0	0	0	0	0	1	0	1	0	0	0	0	1	0	0	0	0	0	0	0	0	0	0	0	0	1	1	0	0	0	0	0
P11277-2;P11277;P11277-3	P11277-2;P11277;P11277-3	16;16;15	13;13;12	13;13;12	Spectrin beta chain, erythrocytic	SPTB	sp|P11277-2|SPTB1_HUMAN Isoform 2 of Spectrin beta chain, erythrocytic OS=Homo sapiens OX=9606 GN=SPTB;sp|P11277|SPTB1_HUMAN Spectrin beta chain, erythrocytic OS=Homo sapiens OX=9606 GN=SPTB PE=1 SV=5;sp|P11277-3|SPTB1_HUMAN Isoform 3 of Spectrin beta chai	3	16	13	13	7	6	6	7	7	7	6	4	6	7	6	7	6	6	8	6	5	5	7	6	5	6	5	8	7	5	6	7	7	7	9	8	4	6	6	5	6	6
P11387	P11387	6	6	5	DNA topoisomerase 1	TOP1	sp|P11387|TOP1_HUMAN DNA topoisomerase 1 OS=Homo sapiens OX=9606 GN=TOP1 PE=1 SV=2	1	6	6	5	3	3	1	1	2	3	1	1	3	1	1	1	3	3	2	0	2	3	1	2	2	0	1	2	3	1	1	1	2	1	3	0	2	2	2	1	2	2
P11388;P11388-2;P11388-3;P11388-4	P11388;P11388-2;P11388-3;P11388-4	6;6;6;6	1;1;1;1	1;1;1;1	DNA topoisomerase 2-alpha	TOP2A	sp|P11388|TOP2A_HUMAN DNA topoisomerase 2-alpha OS=Homo sapiens OX=9606 GN=TOP2A PE=1 SV=3;sp|P11388-2|TOP2A_HUMAN Isoform 2 of DNA topoisomerase 2-alpha OS=Homo sapiens OX=9606 GN=TOP2A;sp|P11388-3|TOP2A_HUMAN Isoform 3 of DNA topoisomerase 2-alpha OS=Hom	4	6	1	1	4	4	4	5	4	2	4	3	4	4	3	3	4	5	4	4	3	3	3	4	3	4	4	3	5	4	4	4	5	4	4	4	3	4	4	2	3	3
P11413;P11413-3;P11413-2	P11413;P11413-3;P11413-2	8;8;8	8;8;8	8;8;8	Glucose-6-phosphate 1-dehydrogenase	G6PD	sp|P11413|G6PD_HUMAN Glucose-6-phosphate 1-dehydrogenase OS=Homo sapiens OX=9606 GN=G6PD PE=1 SV=4;sp|P11413-3|G6PD_HUMAN Isoform 3 of Glucose-6-phosphate 1-dehydrogenase OS=Homo sapiens OX=9606 GN=G6PD;sp|P11413-2|G6PD_HUMAN Isoform Long of Glucose-6-phos	3	8	8	8	4	3	4	4	4	3	2	2	5	5	2	4	5	4	5	4	7	3	1	2	5	5	5	3	6	5	3	4	3	5	5	5	6	4	5	6	4	4
P11488	P11488	17	17	11	Guanine nucleotide-binding protein G(t) subunit alpha-1	GNAT1	sp|P11488|GNAT1_HUMAN Guanine nucleotide-binding protein G(t) subunit alpha-1 OS=Homo sapiens OX=9606 GN=GNAT1 PE=1 SV=5	1	17	17	11	11	14	14	14	12	12	13	14	14	13	13	13	11	15	13	14	13	13	13	12	13	13	13	14	12	15	13	14	14	13	15	13	11	14	14	13	11	14
P11498;P11498-2	P11498	13;6	13;6	13;6	Pyruvate carboxylase, mitochondrial	PC	sp|P11498|PYC_HUMAN Pyruvate carboxylase, mitochondrial OS=Homo sapiens OX=9606 GN=PC PE=1 SV=2	2	13	13	13	7	6	7	6	6	6	7	5	7	7	9	6	9	7	9	6	7	8	6	5	6	9	7	4	6	9	5	5	7	9	7	7	6	7	6	6	7	6
P11532;P11532-11;P11532-4;P11532-2;P11532-3;P11532-14;P11532-12;P11532-15;P11532-17;P11532-16;P11532-13;Q5GN48-3;P11532-6;P11532-5;P11532-7;P11532-8;P11532-9;Q5GN48-5;Q5GN48-4;P11532-18	P11532;P11532-11;P11532-4;P11532-2;P11532-3;P11532-14;P11532-12;P11532-15;P11532-17;P11532-16;P11532-13;Q5GN48-3;P11532-6;P11532-5;P11532-7;P11532-8;P11532-9;Q5GN48-5;Q5GN48-4	13;13;13;13;13;10;10;10;10;9;9;8;8;8;8;8;7;7;7;6	3;3;3;3;3;1;1;1;1;1;1;0;0;0;0;0;0;0;0;0	3;3;3;3;3;1;1;1;1;1;1;0;0;0;0;0;0;0;0;0	Dystrophin	DMD	sp|P11532|DMD_HUMAN Dystrophin OS=Homo sapiens OX=9606 GN=DMD PE=1 SV=3;sp|P11532-11|DMD_HUMAN Isoform 3 of Dystrophin OS=Homo sapiens OX=9606 GN=DMD;sp|P11532-4|DMD_HUMAN Isoform 2 of Dystrophin OS=Homo sapiens OX=9606 GN=DMD;sp|P11532-2|DMD_HUMAN Isoform	20	13	3	3	4	5	3	2	2	4	1	3	2	1	4	2	5	2	3	4	3	4	3	2	8	2	2	4	4	4	3	3	2	4	2	4	3	3	3	2	1	3
P11586	P11586	6	6	6	C-1-tetrahydrofolate synthase, cytoplasmic;Methylenetetrahydrofolate dehydrogenase;Methenyltetrahydrofolate cyclohydrolase;Formyltetrahydrofolate synthetase;C-1-tetrahydrofolate synthase, cytoplasmic, N-terminally processed	MTHFD1	sp|P11586|C1TC_HUMAN C-1-tetrahydrofolate synthase, cytoplasmic OS=Homo sapiens OX=9606 GN=MTHFD1 PE=1 SV=3	1	6	6	6	2	4	2	2	2	3	2	3	2	2	2	2	3	2	2	2	1	2	3	3	2	2	2	3	3	2	2	2	4	2	4	3	2	4	3	2	2	3
P11607-2;P11607;P16615-5;P16615-2;P16615-3;P16615;P16615-4	P11607-2;P11607;P16615-5;P16615-2;P16615-3;P16615;P16615-4	24;24;17;17;17;17;13	24;24;17;17;17;17;13	19;19;12;12;12;12;9	Sarcoplasmic/endoplasmic reticulum calcium ATPase 2	ATP2A2	sp|P11607-2|AT2A2_PIG Isoform 2 of Sarcoplasmic/endoplasmic reticulum calcium ATPase 2 OS=Sus scrofa OX=9823 GN=ATP2A2;sp|P11607|AT2A2_PIG Sarcoplasmic/endoplasmic reticulum calcium ATPase 2 OS=Sus scrofa OX=9823 GN=ATP2A2 PE=1 SV=1;sp|P16615-5|AT2A2_HUMAN	7	24	24	19	10	6	10	9	9	13	11	8	9	9	13	5	9	12	7	9	9	12	7	9	7	7	9	10	11	9	8	9	9	8	8	9	11	8	11	7	9	5
P11708;P40925;P40925-3;P40925-2	P11708	14;5;5;3	14;5;5;3	14;5;5;3			sp|P11708|MDHC_PIG Malate dehydrogenase, cytoplasmic OS=Sus scrofa OX=9823 GN=MDH1 PE=1 SV=4	4	14	14	14	9	9	10	12	10	10	10	11	9	10	9	11	10	11	10	12	10	10	11	11	10	12	8	11	12	10	11	11	9	10	11	10	11	8	9	11	9	10
P11766	P11766	2	2	2	Alcohol dehydrogenase class-3	ADH5	sp|P11766|ADHX_HUMAN Alcohol dehydrogenase class-3 OS=Homo sapiens OX=9606 GN=ADH5 PE=1 SV=4	1	2	2	2	1	2	2	2	1	2	2	2	2	2	2	2	1	2	2	2	1	2	2	2	2	2	2	2	2	2	2	2	1	2	2	2	1	2	2	2	2	2
P11908;P11908-2	P11908;P11908-2	9;9	9;9	4;4	Ribose-phosphate pyrophosphokinase 2	PRPS2	sp|P11908|PRPS2_HUMAN Ribose-phosphate pyrophosphokinase 2 OS=Homo sapiens OX=9606 GN=PRPS2 PE=1 SV=2;sp|P11908-2|PRPS2_HUMAN Isoform 2 of Ribose-phosphate pyrophosphokinase 2 OS=Homo sapiens OX=9606 GN=PRPS2	2	9	9	4	6	6	4	4	5	5	4	5	5	5	2	4	6	5	4	5	5	6	4	5	6	5	5	3	6	4	4	5	5	5	7	4	5	5	4	4	5	4
P11940;P11940-2;Q9H361;Q4VXU2;Q4VXU2-2	P11940;P11940-2	13;12;5;2;1	13;12;5;2;1	7;6;3;0;0	Polyadenylate-binding protein 1	PABPC1	sp|P11940|PABP1_HUMAN Polyadenylate-binding protein 1 OS=Homo sapiens OX=9606 GN=PABPC1 PE=1 SV=2;sp|P11940-2|PABP1_HUMAN Isoform 2 of Polyadenylate-binding protein 1 OS=Homo sapiens OX=9606 GN=PABPC1	5	13	13	7	5	7	4	4	7	4	5	5	3	7	6	5	6	5	4	4	5	6	4	3	6	4	4	6	5	4	6	5	8	6	8	6	5	6	7	5	6	5
P12004	P12004	4	4	4	Proliferating cell nuclear antigen	PCNA	sp|P12004|PCNA_HUMAN Proliferating cell nuclear antigen OS=Homo sapiens OX=9606 GN=PCNA PE=1 SV=1	1	4	4	4	2	2	3	1	2	2	1	1	1	1	3	1	1	2	1	2	3	2	1	2	2	2	1	0	2	2	0	2	2	1	1	3	1	1	3	0	2	2
P12026	P12026	3	3	3			sp|P12026|ACBP_PIG Acyl-CoA-binding protein OS=Sus scrofa OX=9823 GN=DBI PE=1 SV=2	1	3	3	3	2	2	3	3	2	3	3	3	2	3	3	3	2	3	3	3	2	2	3	2	2	3	3	3	2	3	3	3	2	3	3	3	2	2	2	3	2	2
P12036;P12036-2;P12037	P12036;P12036-2	6;6;2	4;4;2	4;4;2	Neurofilament heavy polypeptide	NEFH	sp|P12036|NFH_HUMAN Neurofilament heavy polypeptide OS=Homo sapiens OX=9606 GN=NEFH PE=1 SV=4;sp|P12036-2|NFH_HUMAN Isoform 2 of Neurofilament heavy polypeptide OS=Homo sapiens OX=9606 GN=NEFH	3	6	4	4	5	4	5	6	5	5	5	6	4	4	5	5	5	4	5	6	5	5	5	5	5	5	5	6	5	6	6	6	4	6	6	6	4	5	5	6	5	5
P12067	P12067	3	1	1			sp|P12067|LYSC1_PIG Lysozyme C-1 OS=Sus scrofa OX=9823 PE=1 SV=1	1	3	1	1	1	0	1	0	0	0	0	0	1	0	1	0	0	0	0	0	0	0	2	1	0	0	0	1	1	1	1	1	0	0	0	0	1	1	1	0	0	1
P12069	P12069	3	3	1			sp|P12069|LYSC3_PIG Lysozyme C-3 OS=Sus scrofa OX=9823 PE=1 SV=2	1	3	3	1	1	0	1	0	0	0	0	0	1	0	1	0	0	0	0	0	0	0	2	1	0	0	0	1	1	1	1	1	0	0	0	0	1	1	1	0	0	1
P12081-4;P12081;P12081-3;P12081-2;P49590-2;P49590	P12081-4;P12081;P12081-3;P12081-2;P49590-2;P49590	6;6;5;5;3;3	6;6;5;5;3;3	6;6;5;5;3;3	Histidine--tRNA ligase, cytoplasmic;Probable histidine--tRNA ligase, mitochondrial	HARS;HARS2	sp|P12081-4|HARS1_HUMAN Isoform 4 of Histidine--tRNA ligase, cytoplasmic OS=Homo sapiens OX=9606 GN=HARS1;sp|P12081|HARS1_HUMAN Histidine--tRNA ligase, cytoplasmic OS=Homo sapiens OX=9606 GN=HARS1 PE=1 SV=2;sp|P12081-3|HARS1_HUMAN Isoform 3 of Histidine--t	6	6	6	6	3	2	2	4	2	2	4	4	4	4	5	3	2	5	4	4	3	2	3	3	4	2	2	5	5	3	2	4	3	2	6	4	4	2	3	3	3	2
P12107-4;P12107-3;P12107;P12107-2	P12107-4;P12107-3;P12107;P12107-2	1;1;1;1	1;1;1;1	1;1;1;1	Collagen alpha-1(XI) chain	COL11A1	sp|P12107-4|COBA1_HUMAN Isoform 4 of Collagen alpha-1(XI) chain OS=Homo sapiens OX=9606 GN=COL11A1;sp|P12107-3|COBA1_HUMAN Isoform C of Collagen alpha-1(XI) chain OS=Homo sapiens OX=9606 GN=COL11A1;sp|P12107|COBA1_HUMAN Collagen alpha-1(XI) chain OS=Homo s	4	1	1	1	0	1	0	1	0	0	1	0	0	0	0	0	0	0	0	0	0	0	0	0	1	0	0	0	0	0	0	0	0	0	0	1	0	0	0	0	0	1
P12110-3;P12110-2;P12110	P12110-3;P12110-2;P12110	1;1;1	1;1;1	1;1;1	Collagen alpha-2(VI) chain	COL6A2	sp|P12110-3|CO6A2_HUMAN Isoform 2C2A of Collagen alpha-2(VI) chain OS=Homo sapiens OX=9606 GN=COL6A2;sp|P12110-2|CO6A2_HUMAN Isoform 2C2A of Collagen alpha-2(VI) chain OS=Homo sapiens OX=9606 GN=COL6A2;sp|P12110|CO6A2_HUMAN Collagen alpha-2(VI) chain OS=H	3	1	1	1	0	0	0	0	0	0	0	0	0	0	0	0	0	0	0	0	0	0	0	0	0	0	0	0	0	0	0	1	0	0	0	0	0	0	1	0	0	0
P12235	P12235	10	2	2	ADP/ATP translocase 1	SLC25A4	sp|P12235|ADT1_HUMAN ADP/ATP translocase 1 OS=Homo sapiens OX=9606 GN=SLC25A4 PE=1 SV=4	1	10	2	2	6	7	8	9	8	7	8	8	8	8	7	8	7	7	8	7	7	7	7	9	7	7	7	7	8	7	7	7	8	7	9	8	6	8	7	7	7	8
P12236	P12236	14	7	0	ADP/ATP translocase 3;ADP/ATP translocase 3, N-terminally processed	SLC25A6	sp|P12236|ADT3_HUMAN ADP/ATP translocase 3 OS=Homo sapiens OX=9606 GN=SLC25A6 PE=1 SV=4	1	14	7	0	7	8	9	9	10	8	9	8	9	10	8	10	9	8	8	9	9	9	9	9	9	8	9	8	10	9	8	9	10	9	9	10	8	10	8	8	9	9
P12268	P12268	12	11	11	Inosine-5-monophosphate dehydrogenase 2	IMPDH2	sp|P12268|IMDH2_HUMAN Inosine-5-monophosphate dehydrogenase 2 OS=Homo sapiens OX=9606 GN=IMPDH2 PE=1 SV=2	1	12	11	11	5	4	5	5	7	3	4	4	3	3	4	4	5	4	6	4	5	2	4	4	3	4	5	4	5	3	5	5	3	4	6	5	4	4	5	4	4	4
P12270;P12270-2	P12270	21;9	21;9	21;9	Nucleoprotein TPR	TPR	sp|P12270|TPR_HUMAN Nucleoprotein TPR OS=Homo sapiens OX=9606 GN=TPR PE=1 SV=3	2	21	21	21	9	8	10	10	8	11	8	9	6	7	9	11	9	9	8	10	9	11	12	8	9	9	8	11	9	12	10	12	11	11	12	12	6	7	7	10	10	7
P12271	P12271	5	5	5	Retinaldehyde-binding protein 1	RLBP1	sp|P12271|RLBP1_HUMAN Retinaldehyde-binding protein 1 OS=Homo sapiens OX=9606 GN=RLBP1 PE=1 SV=2	1	5	5	5	4	4	5	4	4	4	4	4	4	4	4	3	4	4	4	3	4	4	5	5	4	4	4	5	2	4	3	5	5	5	5	5	5	3	5	4	5	4
P12273	P12273	1	1	1	Prolactin-inducible protein	PIP	sp|P12273|PIP_HUMAN Prolactin-inducible protein OS=Homo sapiens OX=9606 GN=PIP PE=1 SV=1	1	1	1	1	0	0	0	0	0	0	0	0	0	0	0	0	0	0	0	0	0	0	0	0	0	0	0	0	0	0	0	0	0	0	0	0	0	0	0	0	1	0
P12277	P12277	12	1	1	Creatine kinase B-type	CKB	sp|P12277|KCRB_HUMAN Creatine kinase B-type OS=Homo sapiens OX=9606 GN=CKB PE=1 SV=1	1	12	1	1	11	11	11	11	10	11	11	11	11	11	11	11	11	11	11	11	10	11	10	11	11	11	11	11	11	11	10	11	11	11	11	11	11	11	10	11	11	11
P12309	P12309	3	3	3			sp|P12309|GLRX1_PIG Glutaredoxin-1 OS=Sus scrofa OX=9823 GN=GLRX PE=1 SV=2	1	3	3	3	2	1	1	1	2	0	1	0	2	0	0	2	2	0	0	0	2	0	1	0	1	0	0	0	1	0	2	1	3	1	2	1	3	3	0	1	3	2
P12429	P12429	2	2	2	Annexin A3	ANXA3	sp|P12429|ANXA3_HUMAN Annexin A3 OS=Homo sapiens OX=9606 GN=ANXA3 PE=1 SV=3	1	2	2	2	1	1	0	0	0	0	0	1	0	1	0	0	0	1	0	1	0	1	1	1	0	1	0	1	1	0	1	0	1	1	1	1	1	0	1	0	1	1
P12532;P12532-2	P12532;P12532-2	15;13	2;0	2;0	Creatine kinase U-type, mitochondrial	CKMT1A	sp|P12532|KCRU_HUMAN Creatine kinase U-type, mitochondrial OS=Homo sapiens OX=9606 GN=CKMT1A PE=1 SV=1;sp|P12532-2|KCRU_HUMAN Isoform 2 of Creatine kinase U-type, mitochondrial OS=Homo sapiens OX=9606 GN=CKMT1A	2	15	2	2	9	8	9	8	10	9	9	10	9	10	9	10	8	9	9	9	9	9	9	10	8	8	8	10	11	10	10	10	11	10	12	11	9	10	12	12	12	12
P12662	P12662	1	1	1			sp|P12662|RET3_PIG Retinol-binding protein 3 (Fragment) OS=Sus scrofa OX=9823 GN=RBP3 PE=1 SV=1	1	1	1	1	1	0	0	1	0	0	1	1	1	1	1	1	0	1	0	1	1	0	1	1	0	0	1	1	1	1	0	1	1	1	1	1	1	0	0	1	1	0
P12675	P12675	8	8	8			sp|P12675|ICAL_PIG Calpastatin OS=Sus scrofa OX=9823 GN=CAST PE=1 SV=1	1	8	8	8	1	1	1	0	0	0	1	2	0	0	1	0	2	1	1	2	2	1	1	2	0	0	0	0	1	0	1	1	0	0	1	1	1	0	0	0	1	0
P12682	P12682	10	1	1			sp|P12682|HMGB1_PIG High mobility group protein B1 OS=Sus scrofa OX=9823 GN=HMGB1 PE=2 SV=3	1	10	1	1	2	4	5	5	4	6	4	6	3	3	4	5	4	6	6	7	4	6	4	6	5	6	6	6	5	5	5	7	5	6	6	6	6	4	4	5	5	6
P12694;P12694-2	P12694;P12694-2	3;2	3;2	3;2	2-oxoisovalerate dehydrogenase subunit alpha, mitochondrial	BCKDHA	sp|P12694|ODBA_HUMAN 2-oxoisovalerate dehydrogenase subunit alpha, mitochondrial OS=Homo sapiens OX=9606 GN=BCKDHA PE=1 SV=2;sp|P12694-2|ODBA_HUMAN Isoform 2 of 2-oxoisovalerate dehydrogenase subunit alpha, mitochondrial OS=Homo sapiens OX=9606 GN=BCKDHA	2	3	3	3	2	1	1	2	2	2	2	3	2	1	1	2	3	3	1	3	2	1	1	2	2	2	1	2	2	1	2	2	2	1	3	2	1	2	1	2	3	1
P12814;P35609-2;P35609;Q08043	P12814	30;9;9;6	17;1;1;1	1;0;0;0	Alpha-actinin-1	ACTN1	sp|P12814|ACTN1_HUMAN Alpha-actinin-1 OS=Homo sapiens OX=9606 GN=ACTN1 PE=1 SV=2	4	30	17	1	14	10	14	15	14	12	12	12	14	12	14	13	14	12	14	13	14	13	14	14	16	13	12	12	18	12	16	16	17	13	18	18	13	14	16	16	14	16
P12814-2;P12814-3;P12814-4	P12814-2;P12814-3;P12814-4	30;30;30	1;1;1	1;1;1	Alpha-actinin-1	ACTN1	sp|P12814-2|ACTN1_HUMAN Isoform 2 of Alpha-actinin-1 OS=Homo sapiens OX=9606 GN=ACTN1;sp|P12814-3|ACTN1_HUMAN Isoform 3 of Alpha-actinin-1 OS=Homo sapiens OX=9606 GN=ACTN1;sp|P12814-4|ACTN1_HUMAN Isoform 4 of Alpha-actinin-1 OS=Homo sapiens OX=9606 GN=ACTN	3	30	1	1	13	9	13	14	13	11	12	12	14	12	13	13	13	12	13	13	13	12	14	13	15	13	11	11	17	11	15	15	16	13	18	17	12	13	15	16	14	16
Q9TV61;P12882;Q9UKX2;P13535	Q9TV61;P12882;Q9UKX2;P13535	6;6;5;4	1;1;1;1	0;0;0;0	Myosin-1;Myosin-2;Myosin-8	MYH1;MYH2;MYH8	sp|Q9TV61|MYH1_PIG Myosin-1 OS=Sus scrofa OX=9823 GN=MYH1 PE=2 SV=1;sp|P12882|MYH1_HUMAN Myosin-1 OS=Homo sapiens OX=9606 GN=MYH1 PE=1 SV=3;sp|Q9UKX2|MYH2_HUMAN Myosin-2 OS=Homo sapiens OX=9606 GN=MYH2 PE=1 SV=1;sp|P13535|MYH8_HUMAN Myosin-8 OS=Homo sapien	4	6	1	0	0	0	0	0	0	0	0	0	0	0	0	0	0	0	0	0	0	0	0	0	0	0	0	0	0	0	0	0	0	0	0	0	0	0	0	0	0	0
P12931;P12931-2	P12931;P12931-2	7;7	7;7	5;5	Proto-oncogene tyrosine-protein kinase Src	SRC	sp|P12931|SRC_HUMAN Proto-oncogene tyrosine-protein kinase Src OS=Homo sapiens OX=9606 GN=SRC PE=1 SV=3;sp|P12931-2|SRC_HUMAN Isoform 2 of Proto-oncogene tyrosine-protein kinase Src OS=Homo sapiens OX=9606 GN=SRC	2	7	7	5	2	1	3	3	2	2	3	3	0	3	2	3	2	2	4	2	2	3	2	4	2	3	2	3	2	2	2	2	3	1	3	5	2	3	2	2	2	3
P12955-3;P12955-2;P12955	P12955-3;P12955-2;P12955	2;2;2	2;2;2	2;2;2	Xaa-Pro dipeptidase	PEPD	sp|P12955-3|PEPD_HUMAN Isoform 3 of Xaa-Pro dipeptidase OS=Homo sapiens OX=9606 GN=PEPD;sp|P12955-2|PEPD_HUMAN Isoform 2 of Xaa-Pro dipeptidase OS=Homo sapiens OX=9606 GN=PEPD;sp|P12955|PEPD_HUMAN Xaa-Pro dipeptidase OS=Homo sapiens OX=9606 GN=PEPD PE=1 SV	3	2	2	2	2	1	0	0	2	1	1	1	1	0	0	1	1	0	0	1	1	1	0	1	0	0	0	0	1	0	1	0	2	0	1	1	2	0	2	2	1	2
P13222;P28329-3;P28329-2;P28329	P13222	5;2;2;2	5;2;2;2	5;2;2;2			sp|P13222|CLAT_PIG Choline O-acetyltransferase OS=Sus scrofa OX=9823 GN=CHAT PE=1 SV=3	4	5	5	5	2	0	2	0	3	2	0	0	3	0	1	1	2	2	0	2	0	2	1	1	3	2	3	1	3	0	2	1	1	1	2	3	3	0	2	0	3	1
P13591-4;P13591-3;P13591-1;P13591;P13591-5;P13591-6	P13591-4;P13591-3;P13591-1;P13591;P13591-5	8;8;8;8;4;3	8;8;8;8;4;3	8;8;8;8;4;3	Neural cell adhesion molecule 1	NCAM1	sp|P13591-4|NCAM1_HUMAN Isoform 4 of Neural cell adhesion molecule 1 OS=Homo sapiens OX=9606 GN=NCAM1;sp|P13591-3|NCAM1_HUMAN Isoform 3 of Neural cell adhesion molecule 1 OS=Homo sapiens OX=9606 GN=NCAM1;sp|P13591-1|NCAM1_HUMAN Isoform 2 of Neural cell adh	6	8	8	8	5	7	5	5	4	5	5	6	5	4	4	4	5	3	4	7	5	6	5	5	5	4	4	7	7	5	4	5	6	3	4	6	4	5	5	5	5	6
P13618	P13618	4	4	4			sp|P13618|ATP5J_PIG ATP synthase-coupling factor 6, mitochondrial OS=Sus scrofa OX=9823 GN=ATP5PF PE=1 SV=1	1	4	4	4	2	2	1	2	2	1	2	3	1	2	2	3	2	1	2	3	1	1	2	3	2	2	3	3	2	1	2	2	2	1	2	2	2	2	2	2	1	0
P13637;P13637-2;P13637-3	P13637;P13637-2;P13637-3	36;36;36	36;36;36	19;19;19	Sodium/potassium-transporting ATPase subunit alpha-3	ATP1A3	sp|P13637|AT1A3_HUMAN Sodium/potassium-transporting ATPase subunit alpha-3 OS=Homo sapiens OX=9606 GN=ATP1A3 PE=1 SV=3;sp|P13637-2|AT1A3_HUMAN Isoform 2 of Sodium/potassium-transporting ATPase subunit alpha-3 OS=Homo sapiens OX=9606 GN=ATP1A3;sp|P13637-3|A	3	36	36	19	23	27	27	25	23	27	25	28	26	25	25	26	25	29	26	28	25	26	26	27	27	26	25	27	28	25	24	29	28	29	29	31	23	28	28	26	23	29
P13639	P13639	31	31	31	Elongation factor 2	EEF2	sp|P13639|EF2_HUMAN Elongation factor 2 OS=Homo sapiens OX=9606 GN=EEF2 PE=1 SV=4	1	31	31	31	15	14	16	15	13	13	14	18	13	13	15	12	13	13	15	16	14	11	14	17	14	11	14	16	18	10	13	16	16	13	17	19	17	16	17	16	13	16
P13667	P13667	5	5	5	Protein disulfide-isomerase A4	PDIA4	sp|P13667|PDIA4_HUMAN Protein disulfide-isomerase A4 OS=Homo sapiens OX=9606 GN=PDIA4 PE=1 SV=2	1	5	5	5	2	3	2	2	1	2	2	3	2	2	2	3	1	3	2	3	3	2	2	2	2	2	1	2	3	2	2	2	2	1	2	2	2	2	2	2	2	3
P13674;P13674-2;P13674-3	P13674;P13674-2;P13674-3	6;5;4	6;5;4	6;5;4	Prolyl 4-hydroxylase subunit alpha-1	P4HA1	sp|P13674|P4HA1_HUMAN Prolyl 4-hydroxylase subunit alpha-1 OS=Homo sapiens OX=9606 GN=P4HA1 PE=1 SV=2;sp|P13674-2|P4HA1_HUMAN Isoform 2 of Prolyl 4-hydroxylase subunit alpha-1 OS=Homo sapiens OX=9606 GN=P4HA1;sp|P13674-3|P4HA1_HUMAN Isoform 3 of Prolyl 4-h	3	6	6	6	1	3	2	3	1	2	2	2	3	2	1	3	3	3	2	2	2	3	2	2	1	3	2	2	2	2	3	4	2	3	4	3	2	3	1	2	2	1
P61288;P13693;P13693-2;Q56UQ5	P61288;P13693;P13693-2;Q56UQ5	4;4;2;2	4;4;2;2	4;4;2;2	Translationally-controlled tumor protein;TPT1-like protein	TPT1	sp|P61288|TCTP_PIG Translationally-controlled tumor protein OS=Sus scrofa OX=9823 GN=TPT1 PE=2 SV=1;sp|P13693|TCTP_HUMAN Translationally-controlled tumor protein OS=Homo sapiens OX=9606 GN=TPT1 PE=1 SV=1;sp|P13693-2|TCTP_HUMAN Isoform 2 of Translationally-	4	4	4	4	3	3	2	3	3	1	3	3	2	2	2	3	3	2	3	4	3	3	3	4	3	2	2	3	2	3	2	3	2	1	4	4	2	2	3	2	2	3
P13716;P13716-2	P13716;P13716-2	4;3	4;3	4;3	Delta-aminolevulinic acid dehydratase	ALAD	sp|P13716|HEM2_HUMAN Delta-aminolevulinic acid dehydratase OS=Homo sapiens OX=9606 GN=ALAD PE=1 SV=1;sp|P13716-2|HEM2_HUMAN Isoform 2 of Delta-aminolevulinic acid dehydratase OS=Homo sapiens OX=9606 GN=ALAD	2	4	4	4	2	2	2	2	3	1	2	1	2	2	1	1	1	1	2	2	1	2	2	3	2	0	2	2	1	2	1	2	2	1	3	2	0	2	2	2	0	2
P13796;P13796-2	P13796	12;4	9;4	9;4	Plastin-2	LCP1	sp|P13796|PLSL_HUMAN Plastin-2 OS=Homo sapiens OX=9606 GN=LCP1 PE=1 SV=6	2	12	9	9	5	2	5	5	3	4	3	4	5	4	4	6	1	3	3	5	6	4	6	5	2	1	2	3	4	5	5	6	2	1	3	4	5	5	3	3	2	3
P13797;P13797-3;P13797-2	P13797;P13797-3;P13797-2	13;12;12	13;12;12	9;8;8	Plastin-3	PLS3	sp|P13797|PLST_HUMAN Plastin-3 OS=Homo sapiens OX=9606 GN=PLS3 PE=1 SV=4;sp|P13797-3|PLST_HUMAN Isoform 3 of Plastin-3 OS=Homo sapiens OX=9606 GN=PLS3;sp|P13797-2|PLST_HUMAN Isoform 2 of Plastin-3 OS=Homo sapiens OX=9606 GN=PLS3	3	13	13	9	5	6	6	7	7	4	8	6	7	7	8	8	7	7	8	8	5	6	7	7	7	6	8	7	8	5	11	8	6	5	10	8	8	7	6	7	5	8
P13804;P13804-2	P13804;P13804-2	7;6	7;6	7;6	Electron transfer flavoprotein subunit alpha, mitochondrial	ETFA	sp|P13804|ETFA_HUMAN Electron transfer flavoprotein subunit alpha, mitochondrial OS=Homo sapiens OX=9606 GN=ETFA PE=1 SV=1;sp|P13804-2|ETFA_HUMAN Isoform 2 of Electron transfer flavoprotein subunit alpha, mitochondrial OS=Homo sapiens OX=9606 GN=ETFA	2	7	7	7	5	3	3	4	5	4	5	3	4	2	3	4	3	5	2	4	3	2	3	4	4	4	5	4	3	4	4	4	3	5	5	6	3	4	4	4	3	5
P13807-2;P13807	P13807-2;P13807	6;6	6;6	6;6	Glycogen [starch] synthase, muscle	GYS1	sp|P13807-2|GYS1_HUMAN Isoform 2 of Glycogen [starch] synthase, muscle OS=Homo sapiens OX=9606 GN=GYS1;sp|P13807|GYS1_HUMAN Glycogen [starch] synthase, muscle OS=Homo sapiens OX=9606 GN=GYS1 PE=1 SV=2	2	6	6	6	0	2	1	1	1	2	1	1	0	1	1	0	2	1	1	1	2	2	0	1	1	1	2	1	2	0	1	1	1	0	1	1	0	0	1	1	2	0
P13861;P13861-2;P05207	P13861;P13861-2	15;15;5	15;15;5	12;12;4	cAMP-dependent protein kinase type II-alpha regulatory subunit	PRKAR2A	sp|P13861|KAP2_HUMAN cAMP-dependent protein kinase type II-alpha regulatory subunit OS=Homo sapiens OX=9606 GN=PRKAR2A PE=1 SV=2;sp|P13861-2|KAP2_HUMAN Isoform 2 of cAMP-dependent protein kinase type II-alpha regulatory subunit OS=Homo sapiens OX=9606 GN=P	3	15	15	12	9	10	9	9	10	9	7	10	9	9	10	11	11	11	8	7	10	9	8	10	9	9	9	9	11	9	9	10	10	8	11	12	9	8	8	8	12	12
P13984	P13984	1	1	1	General transcription factor IIF subunit 2	GTF2F2	sp|P13984|T2FB_HUMAN General transcription factor IIF subunit 2 OS=Homo sapiens OX=9606 GN=GTF2F2 PE=1 SV=2	1	1	1	1	0	0	0	0	0	1	1	1	0	1	1	1	0	0	0	1	0	0	0	0	0	0	0	1	0	1	0	0	0	0	0	1	0	0	1	0	0	0
P14136-3;P14136;P14136-2	P14136-3;P14136;P14136-2	14;14;14	13;13;13	13;13;13	Glial fibrillary acidic protein	GFAP	sp|P14136-3|GFAP_HUMAN Isoform 3 of Glial fibrillary acidic protein OS=Homo sapiens OX=9606 GN=GFAP;sp|P14136|GFAP_HUMAN Glial fibrillary acidic protein OS=Homo sapiens OX=9606 GN=GFAP PE=1 SV=1;sp|P14136-2|GFAP_HUMAN Isoform 2 of Glial fibrillary acidic p	3	14	13	13	5	4	5	5	4	3	7	5	3	6	6	6	4	5	5	6	5	5	5	5	5	4	5	6	5	4	5	6	6	6	7	5	6	5	6	6	4	6
P14287	P14287	7	7	7			sp|P14287|OSTP_PIG Osteopontin OS=Sus scrofa OX=9823 GN=SPP1 PE=1 SV=1	1	7	7	7	3	4	3	3	3	3	1	2	2	2	3	3	2	2	1	1	4	3	2	3	1	1	1	0	2	2	1	2	0	1	2	2	4	4	5	4	3	2
P14314-2;P14314	P14314-2;P14314	4;4	4;4	4;4	Glucosidase 2 subunit beta	PRKCSH	sp|P14314-2|GLU2B_HUMAN Isoform 2 of Glucosidase 2 subunit beta OS=Homo sapiens OX=9606 GN=PRKCSH;sp|P14314|GLU2B_HUMAN Glucosidase 2 subunit beta OS=Homo sapiens OX=9606 GN=PRKCSH PE=1 SV=2	2	4	4	4	0	2	1	1	0	1	1	1	0	0	1	0	1	1	0	1	1	0	2	1	0	0	1	2	0	1	0	2	0	0	1	2	1	0	0	0	1	0
P14317	P14317	1	1	1	Hematopoietic lineage cell-specific protein	HCLS1	sp|P14317|HCLS1_HUMAN Hematopoietic lineage cell-specific protein OS=Homo sapiens OX=9606 GN=HCLS1 PE=1 SV=3	1	1	1	1	0	0	0	0	0	0	0	0	0	0	0	0	0	0	0	0	0	0	0	0	0	0	0	0	0	0	0	0	0	0	0	0	0	0	0	0	0	0
P14324-2;P14324	P14324-2;P14324	1;1	1;1	1;1	Farnesyl pyrophosphate synthase	FDPS	sp|P14324-2|FPPS_HUMAN Isoform 2 of Farnesyl pyrophosphate synthase OS=Homo sapiens OX=9606 GN=FDPS;sp|P14324|FPPS_HUMAN Farnesyl pyrophosphate synthase OS=Homo sapiens OX=9606 GN=FDPS PE=1 SV=4	2	1	1	1	0	0	0	0	0	0	0	0	0	0	0	0	0	0	1	0	1	1	1	0	0	0	0	0	0	0	1	1	0	0	1	1	1	0	1	0	0	0
P14332	P14332	3	2	2			sp|P14332|6PGD_PIG 6-phosphogluconate dehydrogenase, decarboxylating (Fragment) OS=Sus scrofa OX=9823 GN=PGD PE=2 SV=3	1	3	2	2	1	1	2	1	1	2	2	2	2	2	2	1	1	2	2	2	1	1	0	1	1	1	2	1	1	2	2	2	2	2	2	3	0	2	2	0	1	1
P14415	P14415	6	6	6	Sodium/potassium-transporting ATPase subunit beta-2	ATP1B2	sp|P14415|AT1B2_HUMAN Sodium/potassium-transporting ATPase subunit beta-2 OS=Homo sapiens OX=9606 GN=ATP1B2 PE=1 SV=3	1	6	6	6	1	1	0	2	1	1	2	0	1	0	0	1	1	2	1	0	2	2	0	1	3	2	0	2	3	1	2	1	2	2	2	3	0	2	1	1	2	4
P14618;P14618-3;P30613-2;P30613	P14618;P14618-3	26;22;1;1	3;3;0;0	3;3;0;0	Pyruvate kinase PKM	PKM	sp|P14618|KPYM_HUMAN Pyruvate kinase PKM OS=Homo sapiens OX=9606 GN=PKM PE=1 SV=4;sp|P14618-3|KPYM_HUMAN Isoform 3 of Pyruvate kinase PKM OS=Homo sapiens OX=9606 GN=PKM	4	26	3	3	17	23	21	21	20	22	19	19	17	17	19	20	18	20	19	20	20	18	19	21	15	18	20	21	19	20	21	22	21	23	23	22	20	21	22	22	17	21
P14618-2	P14618-2	28	28	5	Pyruvate kinase PKM	PKM	sp|P14618-2|KPYM_HUMAN Isoform M1 of Pyruvate kinase PKM OS=Homo sapiens OX=9606 GN=PKM	1	28	28	5	18	24	22	23	22	22	21	20	19	19	20	21	19	22	21	20	21	20	20	21	17	19	21	22	20	21	22	25	22	24	23	24	20	23	23	25	18	22
P14632	P14632	15	14	14			sp|P14632|TRFL_PIG Lactotransferrin OS=Sus scrofa OX=9823 GN=LTF PE=1 SV=3	1	15	14	14	12	9	6	10	1	1	1	1	11	9	8	12	1	1	1	1	11	11	11	11	0	1	1	0	11	7	8	9	1	1	2	1	1	1	1	1	1	1
P14678-2;P63162;P14678;P63162-2;P14678-3	P14678-2;P63162;P14678;P63162-2;P14678-3	6;6;6;6;6	6;6;6;6;6	6;6;6;6;6	Small nuclear ribonucleoprotein-associated proteins B and B;Small nuclear ribonucleoprotein-associated protein N	SNRPB;SNRPN	sp|P14678-2|RSMB_HUMAN Isoform SM-B of Small nuclear ribonucleoprotein-associated proteins B and B OS=Homo sapiens OX=9606 GN=SNRPB;sp|P63162|RSMN_HUMAN Small nuclear ribonucleoprotein-associated protein N OS=Homo sapiens OX=9606 GN=SNRPN PE=1 SV=1;sp|P14	5	6	6	6	4	4	4	5	3	3	4	4	4	4	3	3	5	5	5	3	5	4	5	3	5	5	5	3	5	5	4	5	5	4	5	5	4	4	5	3	5	4
P14735;P14735-2	P14735	6;2	6;2	6;2	Insulin-degrading enzyme	IDE	sp|P14735|IDE_HUMAN Insulin-degrading enzyme OS=Homo sapiens OX=9606 GN=IDE PE=1 SV=4	2	6	6	6	0	4	2	4	3	3	2	3	2	3	2	0	1	2	3	2	3	3	3	0	2	2	2	2	2	2	1	3	2	3	3	3	1	3	2	0	0	3
P14854	P14854	1	1	1	Cytochrome c oxidase subunit 6B1	COX6B1	sp|P14854|CX6B1_HUMAN Cytochrome c oxidase subunit 6B1 OS=Homo sapiens OX=9606 GN=COX6B1 PE=1 SV=2	1	1	1	1	1	1	1	1	1	1	1	1	1	1	1	1	1	1	1	1	1	1	1	1	1	1	1	1	1	1	1	1	1	1	1	1	1	1	1	1	1	1
Q29076;P14859-4;P14859-5;P14859-3;P14859;P14859-2;P14859-6	Q29076;P14859-4;P14859-5;P14859-3;P14859;P14859-2;P14859-6	1;1;1;1;1;1;1	1;1;1;1;1;1;1	1;1;1;1;1;1;1	POU domain, class 2, transcription factor 1	POU2F1	sp|Q29076|PO2F1_PIG POU domain, class 2, transcription factor 1 OS=Sus scrofa OX=9823 GN=POU2F1 PE=2 SV=1;sp|P14859-4|PO2F1_HUMAN Isoform 4 of POU domain, class 2, transcription factor 1 OS=Homo sapiens OX=9606 GN=POU2F1;sp|P14859-5|PO2F1_HUMAN Isoform 5 o	7	1	1	1	0	0	0	0	0	0	0	0	0	1	1	0	0	0	0	0	0	0	0	1	0	0	1	1	0	0	0	0	0	1	0	0	0	1	0	0	0	0
P14866-2;P14866	P14866-2;P14866	14;14	14;14	14;14	Heterogeneous nuclear ribonucleoprotein L	HNRNPL	sp|P14866-2|HNRPL_HUMAN Isoform 2 of Heterogeneous nuclear ribonucleoprotein L OS=Homo sapiens OX=9606 GN=HNRNPL;sp|P14866|HNRPL_HUMAN Heterogeneous nuclear ribonucleoprotein L OS=Homo sapiens OX=9606 GN=HNRNPL PE=1 SV=2	2	14	14	14	8	8	7	9	8	9	7	8	7	6	7	7	8	9	7	8	9	6	8	7	7	8	8	8	8	7	6	8	8	9	10	10	8	10	8	8	11	9
P14867;P31644;P34903	P14867	4;1;1	4;1;1	3;0;0	Gamma-aminobutyric acid receptor subunit alpha-1	GABRA1	sp|P14867|GBRA1_HUMAN Gamma-aminobutyric acid receptor subunit alpha-1 OS=Homo sapiens OX=9606 GN=GABRA1 PE=1 SV=3	3	4	4	3	0	0	0	0	0	1	0	0	1	0	0	0	1	0	1	0	0	0	1	0	0	0	2	0	0	0	1	0	1	0	2	0	1	0	0	0	1	2
P14868;P14868-2	P14868;P14868-2	13;12	13;12	13;12	Aspartate--tRNA ligase, cytoplasmic	DARS	sp|P14868|SYDC_HUMAN Aspartate--tRNA ligase, cytoplasmic OS=Homo sapiens OX=9606 GN=DARS1 PE=1 SV=2;sp|P14868-2|SYDC_HUMAN Isoform 2 of Aspartate--tRNA ligase, cytoplasmic OS=Homo sapiens OX=9606 GN=DARS1	2	13	13	13	5	8	6	7	6	6	9	6	6	7	7	4	5	6	7	6	5	8	5	7	7	7	8	7	10	9	8	8	8	8	7	10	5	8	7	10	3	8
P14927;P14927-2	P14927;P14927-2	2;2	2;2	2;2	Cytochrome b-c1 complex subunit 7	UQCRB	sp|P14927|QCR7_HUMAN Cytochrome b-c1 complex subunit 7 OS=Homo sapiens OX=9606 GN=UQCRB PE=1 SV=2;sp|P14927-2|QCR7_HUMAN Isoform 2 of Cytochrome b-c1 complex subunit 7 OS=Homo sapiens OX=9606 GN=UQCRB	2	2	2	2	0	1	0	1	0	0	1	0	1	1	1	0	0	1	0	0	1	1	0	0	1	1	0	1	1	0	1	1	1	0	0	1	0	0	0	1	0	0
P15145;P15144	P15145	18;1	18;1	18;1			sp|P15145|AMPN_PIG Aminopeptidase N OS=Sus scrofa OX=9823 GN=ANPEP PE=1 SV=4	2	18	18	18	8	7	6	4	5	7	6	5	5	4	5	4	5	4	3	6	7	6	7	6	4	4	4	4	8	5	3	5	4	3	5	9	8	8	7	5	8	8
P15170;P15170-2;P15170-3;Q8IYD1	P15170;P15170-2;P15170-3	7;7;7;3	7;7;7;3	7;7;7;3	Eukaryotic peptide chain release factor GTP-binding subunit ERF3A	GSPT1	sp|P15170|ERF3A_HUMAN Eukaryotic peptide chain release factor GTP-binding subunit ERF3A OS=Homo sapiens OX=9606 GN=GSPT1 PE=1 SV=1;sp|P15170-2|ERF3A_HUMAN Isoform 2 of Eukaryotic peptide chain release factor GTP-binding subunit ERF3A OS=Homo sapiens OX=960	4	7	7	7	0	1	1	1	2	1	1	1	1	1	1	0	0	2	1	2	3	2	1	2	1	1	0	1	1	1	0	1	1	1	1	2	2	1	1	0	2	1
P15311	P15311	8	2	2	Ezrin	EZR	sp|P15311|EZRI_HUMAN Ezrin OS=Homo sapiens OX=9606 GN=EZR PE=1 SV=4	1	8	2	2	3	4	4	4	3	5	4	3	4	5	4	4	4	4	4	2	3	5	2	2	5	5	4	5	4	5	4	3	4	3	4	3	5	4	5	4	5	4
P15531;P15531-2	P15531;P15531-2	6;6	1;1	1;1	Nucleoside diphosphate kinase A	NME1	sp|P15531|NDKA_HUMAN Nucleoside diphosphate kinase A OS=Homo sapiens OX=9606 GN=NME1 PE=1 SV=1;sp|P15531-2|NDKA_HUMAN Isoform 2 of Nucleoside diphosphate kinase A OS=Homo sapiens OX=9606 GN=NME1	2	6	1	1	4	5	5	6	3	4	5	5	4	5	5	6	3	5	5	6	4	5	5	6	4	4	5	6	5	5	5	6	3	5	6	6	4	5	5	6	4	4
P15586-2;P15586	P15586-2;P15586	1;1	1;1	1;1	N-acetylglucosamine-6-sulfatase	GNS	sp|P15586-2|GNS_HUMAN Isoform 2 of N-acetylglucosamine-6-sulfatase OS=Homo sapiens OX=9606 GN=GNS;sp|P15586|GNS_HUMAN N-acetylglucosamine-6-sulfatase OS=Homo sapiens OX=9606 GN=GNS PE=1 SV=3	2	1	1	1	1	0	1	0	0	0	0	0	1	0	0	1	0	0	0	0	1	0	0	0	1	0	0	0	1	1	0	0	1	1	0	1	0	0	1	0	1	0
P15735-2;P15735	P15735-2;P15735	5;5	5;5	5;5	Phosphorylase b kinase gamma catalytic chain, liver/testis isoform	PHKG2	sp|P15735-2|PHKG2_HUMAN Isoform 2 of Phosphorylase b kinase gamma catalytic chain, liver/testis isoform OS=Homo sapiens OX=9606 GN=PHKG2;sp|P15735|PHKG2_HUMAN Phosphorylase b kinase gamma catalytic chain, liver/testis isoform OS=Homo sapiens OX=9606 GN=PHK	2	5	5	5	2	1	2	0	1	1	0	1	2	0	1	1	3	1	0	0	1	0	0	0	1	1	0	0	3	0	0	1	0	0	1	0	2	1	1	0	1	0
P15880	P15880	7	7	7	40S ribosomal protein S2	RPS2	sp|P15880|RS2_HUMAN 40S ribosomal protein S2 OS=Homo sapiens OX=9606 GN=RPS2 PE=1 SV=2	1	7	7	7	3	4	4	3	3	3	3	5	4	4	3	4	4	2	3	3	4	4	3	2	4	3	3	3	4	3	4	3	5	3	5	3	4	4	4	5	3	4
P15882-2;P15882-3;P15882	P15882-2;P15882-3;P15882	4;4;4	4;4;4	4;4;4	N-chimaerin	CHN1	sp|P15882-2|CHIN_HUMAN Isoform Alpha-1 of N-chimaerin OS=Homo sapiens OX=9606 GN=CHN1;sp|P15882-3|CHIN_HUMAN Isoform 3 of N-chimaerin OS=Homo sapiens OX=9606 GN=CHN1;sp|P15882|CHIN_HUMAN N-chimaerin OS=Homo sapiens OX=9606 GN=CHN1 PE=1 SV=3	3	4	4	4	0	0	1	0	0	0	0	2	0	0	2	2	1	2	2	2	1	0	1	2	0	1	2	1	0	0	2	1	0	0	2	2	0	0	2	1	0	0
P15924;P15924-2;P15924-3	P15924;P15924-2;P15924-3	12;10;10	12;10;10	12;10;10	Desmoplakin	DSP	sp|P15924|DESP_HUMAN Desmoplakin OS=Homo sapiens OX=9606 GN=DSP PE=1 SV=3;sp|P15924-2|DESP_HUMAN Isoform DPII of Desmoplakin OS=Homo sapiens OX=9606 GN=DSP;sp|P15924-3|DESP_HUMAN Isoform DSPIa of Desmoplakin OS=Homo sapiens OX=9606 GN=DSP	3	12	12	12	3	4	4	3	1	0	0	0	2	2	3	2	1	1	1	1	2	1	0	1	3	2	1	3	3	4	4	4	1	1	2	1	1	1	1	0	5	4
P15927;P15927-2;P15927-3	P15927;P15927-2;P15927-3	1;1;1	1;1;1	1;1;1	Replication protein A 32 kDa subunit	RPA2	sp|P15927|RFA2_HUMAN Replication protein A 32 kDa subunit OS=Homo sapiens OX=9606 GN=RPA2 PE=1 SV=1;sp|P15927-2|RFA2_HUMAN Isoform 2 of Replication protein A 32 kDa subunit OS=Homo sapiens OX=9606 GN=RPA2;sp|P15927-3|RFA2_HUMAN Isoform 3 of Replication pro	3	1	1	1	0	0	0	1	1	1	1	0	0	0	0	1	0	0	0	1	0	0	1	0	1	0	0	1	1	0	0	0	1	1	0	0	0	0	0	0	0	1
P15981	P15981	2	2	2			sp|P15981|HA2D_PIG SLA class II histocompatibility antigen, DQ haplotype D alpha chain OS=Sus scrofa OX=9823 PE=2 SV=1	1	2	2	2	0	0	0	0	0	0	0	0	1	0	0	0	0	0	0	0	0	0	0	0	0	0	0	0	0	0	0	0	0	0	0	0	0	0	0	0	0	0
P16104	P16104	7	2	0	Histone H2AX	H2AFX	sp|P16104|H2AX_HUMAN Histone H2AX OS=Homo sapiens OX=9606 GN=H2AX PE=1 SV=2	1	7	2	0	4	6	4	5	4	5	4	5	5	5	5	6	4	5	3	4	5	6	4	3	5	5	4	4	4	5	5	4	6	5	6	5	5	6	5	5	5	6
P16152;P16152-2	P16152;P16152-2	6;4	6;4	2;2	Carbonyl reductase [NADPH] 1	CBR1	sp|P16152|CBR1_HUMAN Carbonyl reductase [NADPH] 1 OS=Homo sapiens OX=9606 GN=CBR1 PE=1 SV=3;sp|P16152-2|CBR1_HUMAN Isoform 2 of Carbonyl reductase [NADPH] 1 OS=Homo sapiens OX=9606 GN=CBR1	2	6	6	2	3	4	3	4	3	3	4	4	3	2	4	4	3	3	4	5	3	2	3	4	2	2	4	4	3	4	3	2	4	2	3	4	3	3	3	3	3	3
P16157-2;P16157-8;P16157-12;P16157-21;P16157;P16157-3;P16157-16;P16157-5;P16157-15;P16157-11;P16157-10;P16157-13;P16157-4;P16157-7;P16157-6;P16157-9;P16157-14	P16157-2;P16157-8;P16157-12;P16157-21;P16157;P16157-3;P16157-16;P16157-5;P16157-15;P16157-11;P16157-10;P16157-13;P16157-4;P16157-7;P16157-6;P16157-9;P16157-14	19;19;19;19;19;19;19;19;19;19;19;19;19;19;19;19;19	19;19;19;19;19;19;19;19;19;19;19;19;19;19;19;19;19	19;19;19;19;19;19;19;19;19;19;19;19;19;19;19;19;19	Ankyrin-1	ANK1	sp|P16157-2|ANK1_HUMAN Isoform Er16 of Ankyrin-1 OS=Homo sapiens OX=9606 GN=ANK1;sp|P16157-8|ANK1_HUMAN Isoform Er7 of Ankyrin-1 OS=Homo sapiens OX=9606 GN=ANK1;sp|P16157-12|ANK1_HUMAN Isoform Er11 of Ankyrin-1 OS=Homo sapiens OX=9606 GN=ANK1;sp|P16157-21|	17	19	19	19	4	7	5	8	6	7	7	5	6	6	5	7	8	6	8	5	8	6	6	6	8	6	7	6	9	4	6	7	7	4	9	7	8	3	7	7	8	6
P16220-1;P16220;P16220-3	P16220-1;P16220;P16220-3	2;2;1	2;2;1	2;2;1	Cyclic AMP-responsive element-binding protein 1	CREB1	sp|P16220-1|CREB1_HUMAN Isoform 2 of Cyclic AMP-responsive element-binding protein 1 OS=Homo sapiens OX=9606 GN=CREB1;sp|P16220|CREB1_HUMAN Cyclic AMP-responsive element-binding protein 1 OS=Homo sapiens OX=9606 GN=CREB1 PE=1 SV=3;sp|P16220-3|CREB1_HUMAN I	3	2	2	2	2	1	1	1	1	1	2	1	1	1	0	0	1	2	2	1	0	1	1	1	2	1	1	1	2	1	1	0	1	1	1	2	0	2	2	1	1	1
P16276	P16276	33	33	14			sp|P16276|ACON_PIG Aconitate hydratase, mitochondrial OS=Sus scrofa OX=9823 GN=ACO2 PE=1 SV=1	1	33	33	14	19	19	23	23	22	19	22	23	21	22	21	19	22	19	23	22	20	22	23	21	20	21	20	20	21	22	22	25	24	22	25	24	20	22	24	24	19	21
P16278;P16278-3;P16278-2	P16278;P16278-3;P16278-2	2;2;1	2;2;1	2;2;1	Beta-galactosidase	GLB1	sp|P16278|BGAL_HUMAN Beta-galactosidase OS=Homo sapiens OX=9606 GN=GLB1 PE=1 SV=2;sp|P16278-3|BGAL_HUMAN Isoform 3 of Beta-galactosidase OS=Homo sapiens OX=9606 GN=GLB1;sp|P16278-2|BGAL_HUMAN Isoform 2 of Beta-galactosidase OS=Homo sapiens OX=9606 GN=GLB1	3	2	2	2	0	1	1	1	0	1	1	0	0	0	0	0	1	1	1	0	1	1	0	0	0	0	0	0	0	1	1	0	0	1	1	0	1	0	1	1	1	0
P16298;P16298-4;P16298-2;P16298-3	P16298;P16298-4;P16298-2;P16298-3	8;8;7;7	8;8;7;7	4;4;3;3	Serine/threonine-protein phosphatase 2B catalytic subunit beta isoform	PPP3CB	sp|P16298|PP2BB_HUMAN Serine/threonine-protein phosphatase 2B catalytic subunit beta isoform OS=Homo sapiens OX=9606 GN=PPP3CB PE=1 SV=2;sp|P16298-4|PP2BB_HUMAN Isoform 4 of Serine/threonine-protein phosphatase 2B catalytic subunit beta isoform OS=Homo sap	4	8	8	4	3	1	2	4	3	2	3	3	2	1	2	2	3	4	3	4	2	3	3	3	2	2	4	2	4	3	2	2	1	2	5	3	3	2	2	2	4	1
P16389-2;P16389	P16389-2;P16389	3;3	3;3	3;3	Potassium voltage-gated channel subfamily A member 2	KCNA2	sp|P16389-2|KCNA2_HUMAN Isoform 2 of Potassium voltage-gated channel subfamily A member 2 OS=Homo sapiens OX=9606 GN=KCNA2;sp|P16389|KCNA2_HUMAN Potassium voltage-gated channel subfamily A member 2 OS=Homo sapiens OX=9606 GN=KCNA2 PE=1 SV=2	2	3	3	3	2	2	2	1	1	1	1	2	2	3	1	3	2	2	2	2	0	2	1	2	1	2	1	2	1	2	1	1	2	2	1	2	1	1	1	1	1	2
P16401	P16401	4	3	3	Histone H1.5	HIST1H1B	sp|P16401|H15_HUMAN Histone H1.5 OS=Homo sapiens OX=9606 GN=H1-5 PE=1 SV=3	1	4	3	3	0	1	1	1	0	1	1	3	0	1	1	2	0	2	0	2	0	1	1	2	1	0	2	2	2	0	2	3	1	0	2	2	1	1	1	1	0	2
P16403	P16403	6	1	1	Histone H1.2	HIST1H1C	sp|P16403|H12_HUMAN Histone H1.2 OS=Homo sapiens OX=9606 GN=H1-2 PE=1 SV=2	1	6	1	1	4	5	5	5	3	5	5	5	3	4	5	5	3	4	5	4	4	5	5	5	4	4	5	5	5	4	5	5	5	5	5	5	3	5	5	5	2	5
P16499	P16499	11	7	7	Rod cGMP-specific 3,5-cyclic phosphodiesterase subunit alpha	PDE6A	sp|P16499|PDE6A_HUMAN Rod cGMP-specific 3,5-cyclic phosphodiesterase subunit alpha OS=Homo sapiens OX=9606 GN=PDE6A PE=1 SV=4	1	11	7	7	7	7	9	7	6	6	8	8	7	8	8	7	8	7	9	8	8	6	7	7	9	8	10	7	9	10	9	8	7	5	10	9	6	9	7	8	7	4
P16520;P16520-2	P16520;P16520-2	9;8	7;6	7;6	Guanine nucleotide-binding protein G(I)/G(S)/G(T) subunit beta-3	GNB3	sp|P16520|GBB3_HUMAN Guanine nucleotide-binding protein G(I)/G(S)/G(T) subunit beta-3 OS=Homo sapiens OX=9606 GN=GNB3 PE=1 SV=1;sp|P16520-2|GBB3_HUMAN Isoform 2 of Guanine nucleotide-binding protein G(I)/G(S)/G(T) subunit beta-3 OS=Homo sapiens OX=9606 GN=	2	9	7	7	6	7	8	8	7	6	8	7	5	7	8	6	4	8	8	5	6	7	8	7	6	8	7	6	7	8	8	8	7	8	9	9	6	8	8	8	8	7
P16671-4;P16671-3;P16671	P16671-4;P16671-3;P16671	1;1;1	1;1;1	1;1;1	Platelet glycoprotein 4	CD36	sp|P16671-4|CD36_HUMAN Isoform 4 of Platelet glycoprotein 4 OS=Homo sapiens OX=9606 GN=CD36;sp|P16671-3|CD36_HUMAN Isoform 3 of Platelet glycoprotein 4 OS=Homo sapiens OX=9606 GN=CD36;sp|P16671|CD36_HUMAN Platelet glycoprotein 4 OS=Homo sapiens OX=9606 GN=	3	1	1	1	0	0	0	0	0	0	0	1	0	0	0	0	0	1	0	0	0	1	0	0	0	0	0	0	1	1	0	0	0	1	1	1	0	0	1	0	0	0
P16870-2;P16870	P16870-2;P16870	1;1	1;1	1;1	Carboxypeptidase E	CPE	sp|P16870-2|CBPE_HUMAN Isoform 2 of Carboxypeptidase E OS=Homo sapiens OX=9606 GN=CPE;sp|P16870|CBPE_HUMAN Carboxypeptidase E OS=Homo sapiens OX=9606 GN=CPE PE=1 SV=1	2	1	1	1	1	1	1	1	0	1	1	1	1	1	1	0	1	1	1	1	0	1	1	1	1	1	1	1	1	1	1	1	1	1	1	1	1	1	1	1	1	1
Q6DUB7;P16949;P16949-2;Q93045;Q93045-2	Q6DUB7;P16949;P16949-2	4;4;4;1;1	4;4;4;1;1	4;4;4;1;1	Stathmin	STMN1	sp|Q6DUB7|STMN1_PIG Stathmin OS=Sus scrofa OX=9823 GN=STMN1 PE=2 SV=3;sp|P16949|STMN1_HUMAN Stathmin OS=Homo sapiens OX=9606 GN=STMN1 PE=1 SV=3;sp|P16949-2|STMN1_HUMAN Isoform 2 of Stathmin OS=Homo sapiens OX=9606 GN=STMN1	5	4	4	4	1	2	1	1	2	1	1	3	2	2	2	3	3	2	1	2	2	2	2	3	2	3	1	3	2	2	2	2	3	2	3	4	2	2	1	2	2	3
P17029	P17029	1	1	1	Zinc finger protein with KRAB and SCAN domains 1	ZKSCAN1	sp|P17029|ZKSC1_HUMAN Zinc finger protein with KRAB and SCAN domains 1 OS=Homo sapiens OX=9606 GN=ZKSCAN1 PE=1 SV=3	1	1	1	1	0	0	0	0	0	0	0	0	0	0	0	0	0	1	0	0	0	0	0	0	1	0	0	0	0	1	0	0	0	0	0	0	0	0	0	0	0	0
P17096;P17096-3	P17096;P17096-3	4;4	4;4	4;4	High mobility group protein HMG-I/HMG-Y	HMGA1	sp|P17096|HMGA1_HUMAN High mobility group protein HMG-I/HMG-Y OS=Homo sapiens OX=9606 GN=HMGA1 PE=1 SV=3;sp|P17096-3|HMGA1_HUMAN Isoform HMG-R of High mobility group protein HMG-I/HMG-Y OS=Homo sapiens OX=9606 GN=HMGA1	2	4	4	4	0	0	0	1	0	0	1	1	0	0	0	1	0	0	0	1	1	0	0	1	1	0	0	2	1	1	0	1	2	2	2	3	1	1	2	1	1	2
P17152	P17152	1	1	1	Transmembrane protein 11, mitochondrial	TMEM11	sp|P17152|TMM11_HUMAN Transmembrane protein 11, mitochondrial OS=Homo sapiens OX=9606 GN=TMEM11 PE=1 SV=1	1	1	1	1	0	1	1	1	0	0	1	1	0	0	0	0	0	0	1	1	0	0	1	0	0	0	1	1	0	0	1	1	0	0	1	1	0	0	1	1	0	0
P17252	P17252	14	14	6	Protein kinase C alpha type	PRKCA	sp|P17252|KPCA_HUMAN Protein kinase C alpha type OS=Homo sapiens OX=9606 GN=PRKCA PE=1 SV=4	1	14	14	6	9	7	7	6	7	7	7	6	6	6	7	7	7	6	7	5	6	5	6	8	8	4	7	7	9	6	6	9	6	7	9	9	9	7	6	7	9	6
P17301	P17301	3	3	3	Integrin alpha-2	ITGA2	sp|P17301|ITA2_HUMAN Integrin alpha-2 OS=Homo sapiens OX=9606 GN=ITGA2 PE=1 SV=1	1	3	3	3	0	0	0	0	0	1	1	0	1	0	0	0	0	0	0	0	0	0	0	0	0	0	0	0	1	0	0	0	0	0	0	0	0	0	0	0	1	0
P17480-2;P17480	P17480-2;P17480	4;4	4;4	4;4	Nucleolar transcription factor 1	UBTF	sp|P17480-2|UBF1_HUMAN Isoform UBF2 of Nucleolar transcription factor 1 OS=Homo sapiens OX=9606 GN=UBTF;sp|P17480|UBF1_HUMAN Nucleolar transcription factor 1 OS=Homo sapiens OX=9606 GN=UBTF PE=1 SV=1	2	4	4	4	1	0	0	0	1	0	0	0	0	0	0	0	1	0	0	0	0	0	0	0	1	0	0	1	0	1	0	0	0	0	0	0	0	0	0	1	0	0
P17540	P17540	4	1	1	Creatine kinase S-type, mitochondrial	CKMT2	sp|P17540|KCRS_HUMAN Creatine kinase S-type, mitochondrial OS=Homo sapiens OX=9606 GN=CKMT2 PE=1 SV=2	1	4	1	1	2	3	2	2	3	2	2	3	3	3	2	2	2	2	2	2	2	2	3	3	2	2	2	3	3	3	3	3	3	3	3	3	2	2	3	3	3	2
P17560	P17560	3	3	3			sp|P17560|RENBP_PIG N-acylglucosamine 2-epimerase OS=Sus scrofa OX=9823 GN=RENBP PE=1 SV=2	1	3	3	3	2	2	1	0	1	1	0	1	2	0	1	2	1	1	1	1	1	1	1	2	1	0	0	0	1	1	0	1	0	0	0	1	0	1	0	0	2	1
P17568	P17568	1	1	1	NADH dehydrogenase [ubiquinone] 1 beta subcomplex subunit 7	NDUFB7	sp|P17568|NDUB7_HUMAN NADH dehydrogenase [ubiquinone] 1 beta subcomplex subunit 7 OS=Homo sapiens OX=9606 GN=NDUFB7 PE=1 SV=4	1	1	1	1	1	1	1	1	1	1	1	1	1	1	1	1	1	1	1	1	1	1	1	1	1	1	1	1	1	1	1	1	1	1	1	1	1	1	1	1	1	1
P17600;P17600-2	P17600;P17600-2	13;12	13;12	12;11	Synapsin-1	SYN1	sp|P17600|SYN1_HUMAN Synapsin-1 OS=Homo sapiens OX=9606 GN=SYN1 PE=1 SV=3;sp|P17600-2|SYN1_HUMAN Isoform IB of Synapsin-1 OS=Homo sapiens OX=9606 GN=SYN1	2	13	13	12	7	10	11	9	10	11	9	11	9	9	10	10	9	10	10	10	8	11	10	10	9	10	9	12	10	10	10	11	11	10	11	12	7	10	8	9	6	11
P17655;P17655-2	P17655;P17655-2	5;4	2;1	2;1	Calpain-2 catalytic subunit	CAPN2	sp|P17655|CAN2_HUMAN Calpain-2 catalytic subunit OS=Homo sapiens OX=9606 GN=CAPN2 PE=1 SV=6;sp|P17655-2|CAN2_HUMAN Isoform 2 of Calpain-2 catalytic subunit OS=Homo sapiens OX=9606 GN=CAPN2	2	5	2	2	2	2	2	4	3	1	3	4	2	3	3	2	2	3	3	3	2	1	2	4	2	4	3	3	4	3	4	3	2	3	4	5	2	3	3	4	2	2
P17741;P26583	P17741;P26583	5;5	4;4	4;4	High mobility group protein B2	HMGB2	sp|P17741|HMGB2_PIG High mobility group protein B2 OS=Sus scrofa OX=9823 GN=HMGB2 PE=1 SV=2;sp|P26583|HMGB2_HUMAN High mobility group protein B2 OS=Homo sapiens OX=9606 GN=HMGB2 PE=1 SV=2	2	5	4	4	0	2	2	1	1	2	2	1	2	2	1	1	2	2	2	1	2	2	1	1	1	2	2	3	2	3	1	3	2	1	3	5	1	2	1	3	2	4
P17812;P17812-2	P17812	5;1	5;1	4;1	CTP synthase 1	CTPS1	sp|P17812|PYRG1_HUMAN CTP synthase 1 OS=Homo sapiens OX=9606 GN=CTPS1 PE=1 SV=2	2	5	5	4	1	0	0	1	0	0	0	0	0	0	0	0	0	1	0	0	0	0	0	1	1	1	0	0	0	0	0	1	0	0	0	0	1	0	0	0	1	0
P17844;P17844-2	P17844;P17844-2	14;13	9;8	9;8	Probable ATP-dependent RNA helicase DDX5	DDX5	sp|P17844|DDX5_HUMAN Probable ATP-dependent RNA helicase DDX5 OS=Homo sapiens OX=9606 GN=DDX5 PE=1 SV=1;sp|P17844-2|DDX5_HUMAN Isoform 2 of Probable ATP-dependent RNA helicase DDX5 OS=Homo sapiens OX=9606 GN=DDX5	2	14	9	9	3	6	8	8	6	9	8	7	7	10	7	8	7	10	10	10	7	7	7	10	6	7	8	8	10	8	8	10	7	7	11	10	4	6	9	8	5	6
P17858;P17858-2	P17858;P17858-2	10;8	9;7	8;7	ATP-dependent 6-phosphofructokinase, liver type	PFKL	sp|P17858|PFKAL_HUMAN ATP-dependent 6-phosphofructokinase, liver type OS=Homo sapiens OX=9606 GN=PFKL PE=1 SV=6;sp|P17858-2|PFKAL_HUMAN Isoform 2 of ATP-dependent 6-phosphofructokinase, liver type OS=Homo sapiens OX=9606 GN=PFKL	2	10	9	8	6	6	6	7	6	6	7	6	6	6	6	6	6	6	6	7	6	6	7	6	6	6	5	6	6	6	6	7	5	6	7	7	6	6	6	6	5	6
P17931	P17931	3	3	3	Galectin-3	LGALS3	sp|P17931|LEG3_HUMAN Galectin-3 OS=Homo sapiens OX=9606 GN=LGALS3 PE=1 SV=5	1	3	3	3	0	1	0	1	0	1	0	2	0	2	2	3	0	2	2	2	0	2	2	2	0	2	2	2	0	1	1	2	0	1	2	2	1	2	1	2	0	0
P17980	P17980	12	12	12	26S protease regulatory subunit 6A	PSMC3	sp|P17980|PRS6A_HUMAN 26S proteasome regulatory subunit 6A OS=Homo sapiens OX=9606 GN=PSMC3 PE=1 SV=3	1	12	12	12	6	6	7	7	6	6	6	5	8	7	8	7	7	6	6	6	8	8	5	5	9	7	7	6	8	6	6	8	9	9	9	8	6	7	7	7	7	7
P17987	P17987	19	19	19	T-complex protein 1 subunit alpha	TCP1	sp|P17987|TCPA_HUMAN T-complex protein 1 subunit alpha OS=Homo sapiens OX=9606 GN=TCP1 PE=1 SV=1	1	19	19	19	9	12	12	11	13	10	10	10	8	11	10	13	9	10	12	13	10	11	10	14	12	11	11	14	11	11	12	13	12	11	14	15	10	12	12	10	9	11
P18074;P18074-2	P18074;P18074-2	3;2	3;2	3;2	TFIIH basal transcription factor complex helicase XPD subunit	ERCC2	sp|P18074|ERCC2_HUMAN General transcription and DNA repair factor IIH helicase subunit XPD OS=Homo sapiens OX=9606 GN=ERCC2 PE=1 SV=1;sp|P18074-2|ERCC2_HUMAN Isoform 2 of General transcription and DNA repair factor IIH helicase subunit XPD OS=Homo sapiens	2	3	3	3	0	0	0	1	2	0	0	0	1	0	0	0	1	0	0	0	0	0	0	0	3	0	1	0	1	0	0	1	0	0	1	1	0	0	1	0	1	0
P18084	P18084	5	5	5	Integrin beta-5	ITGB5	sp|P18084|ITB5_HUMAN Integrin beta-5 OS=Homo sapiens OX=9606 GN=ITGB5 PE=1 SV=1	1	5	5	5	1	0	1	1	1	1	1	1	2	1	1	1	1	2	1	1	1	1	1	1	0	0	1	1	0	1	1	1	1	2	1	0	0	1	1	0	1	2
P18085	P18085	4	2	2	ADP-ribosylation factor 4	ARF4	sp|P18085|ARF4_HUMAN ADP-ribosylation factor 4 OS=Homo sapiens OX=9606 GN=ARF4 PE=1 SV=3	1	4	2	2	2	3	3	3	3	3	3	3	3	3	3	3	3	3	3	3	3	3	3	2	3	3	3	2	3	3	3	3	3	3	4	4	3	3	3	3	3	2
P18124	P18124	5	5	5	60S ribosomal protein L7	RPL7	sp|P18124|RL7_HUMAN 60S ribosomal protein L7 OS=Homo sapiens OX=9606 GN=RPL7 PE=1 SV=1	1	5	5	5	3	3	3	4	3	3	3	3	3	3	2	3	3	2	3	3	2	3	2	3	2	3	3	3	3	3	4	4	3	3	3	3	4	3	3	4	3	3
P26234-2;P26234;P18206-2;P18206;P18206-3	P26234-2;P26234;P18206-2;P18206	18;18;18;18;4	18;18;18;18;4	18;18;18;18;4	Vinculin	VCL	sp|P26234-2|VINC_PIG Isoform 1 of Vinculin OS=Sus scrofa OX=9823 GN=VCL;sp|P26234|VINC_PIG Vinculin OS=Sus scrofa OX=9823 GN=VCL PE=1 SV=4;sp|P18206-2|VINC_HUMAN Isoform 1 of Vinculin OS=Homo sapiens OX=9606 GN=VCL;sp|P18206|VINC_HUMAN Vinculin OS=Homo sap	5	18	18	18	8	11	11	10	9	8	10	9	10	10	10	9	9	11	11	9	8	10	8	10	8	9	11	10	7	7	12	10	10	9	12	11	9	11	11	8	6	9
P18433-6;P18433	P18433-6;P18433	8;8	8;8	8;8	Receptor-type tyrosine-protein phosphatase alpha	PTPRA	sp|P18433-6|PTPRA_HUMAN Isoform 2 of Receptor-type tyrosine-protein phosphatase alpha OS=Homo sapiens OX=9606 GN=PTPRA;sp|P18433|PTPRA_HUMAN Receptor-type tyrosine-protein phosphatase alpha OS=Homo sapiens OX=9606 GN=PTPRA PE=1 SV=3	2	8	8	8	1	3	2	1	2	3	1	1	2	1	2	2	2	3	1	3	2	1	1	0	1	2	2	1	1	2	0	1	3	1	1	2	1	3	3	2	1	0
P18507;P18507-2;P18507-3;Q8N1C3	P18507;P18507-2;P18507-3	3;3;3;1	3;3;3;1	3;3;3;1	Gamma-aminobutyric acid receptor subunit gamma-2	GABRG2	sp|P18507|GBRG2_HUMAN Gamma-aminobutyric acid receptor subunit gamma-2 OS=Homo sapiens OX=9606 GN=GABRG2 PE=1 SV=2;sp|P18507-2|GBRG2_HUMAN Isoform 2 of Gamma-aminobutyric acid receptor subunit gamma-2 OS=Homo sapiens OX=9606 GN=GABRG2;sp|P18507-3|GBRG2_HUM	4	3	3	3	0	0	0	0	1	0	0	0	1	1	0	0	1	1	0	1	0	0	0	0	0	0	0	0	0	1	0	0	0	0	0	0	1	0	0	0	0	1
P18583-2;P18583-10;P18583-4;P18583-7;P18583;P18583-5;P18583-9;P18583-3;P18583-6;P18583-8	P18583-2;P18583-10;P18583-4;P18583-7;P18583;P18583-5;P18583-9;P18583-3;P18583-6	5;5;5;5;5;5;5;4;3;2	5;5;5;5;5;5;5;4;3;2	5;5;5;5;5;5;5;4;3;2	Protein SON	SON	sp|P18583-2|SON_HUMAN Isoform A of Protein SON OS=Homo sapiens OX=9606 GN=SON;sp|P18583-10|SON_HUMAN Isoform J of Protein SON OS=Homo sapiens OX=9606 GN=SON;sp|P18583-4|SON_HUMAN Isoform C of Protein SON OS=Homo sapiens OX=9606 GN=SON;sp|P18583-7|SON_HUMAN	10	5	5	5	0	0	2	2	0	2	2	2	1	2	1	2	1	2	2	2	2	3	1	2	1	3	1	2	2	2	2	2	2	2	2	2	1	2	2	1	0	2
P18621-3;P18621;P18621-2	P18621-3;P18621;P18621-2	6;6;5	6;6;5	6;6;5	60S ribosomal protein L17	RPL17	sp|P18621-3|RL17_HUMAN Isoform 3 of 60S ribosomal protein L17 OS=Homo sapiens OX=9606 GN=RPL17;sp|P18621|RL17_HUMAN 60S ribosomal protein L17 OS=Homo sapiens OX=9606 GN=RPL17 PE=1 SV=3;sp|P18621-2|RL17_HUMAN Isoform 2 of 60S ribosomal protein L17 OS=Homo s	3	6	6	6	2	2	3	3	2	2	2	3	2	2	2	4	2	2	2	3	2	2	2	3	3	2	2	4	2	2	2	3	2	3	2	3	2	4	2	2	3	2
P18648;P02647	P18648	16;1	16;1	11;0			sp|P18648|APOA1_PIG Apolipoprotein A-I OS=Sus scrofa OX=9823 GN=APOA1 PE=1 SV=4	2	16	16	11	7	10	9	9	8	10	10	10	6	7	6	10	7	9	8	8	7	9	5	8	5	8	6	5	6	8	6	6	11	10	9	10	8	10	10	10	8	11
P18650	P18650	7	7	7			sp|P18650|APOE_PIG Apolipoprotein E OS=Sus scrofa OX=9823 GN=APOE PE=1 SV=2	1	7	7	7	3	3	3	2	4	3	4	3	4	3	3	3	3	2	2	3	3	3	3	3	3	3	2	3	2	2	2	3	3	2	4	5	3	2	3	2	2	2
P18669;Q8N0Y7	P18669	19;6	19;6	15;3	Phosphoglycerate mutase 1	PGAM1	sp|P18669|PGAM1_HUMAN Phosphoglycerate mutase 1 OS=Homo sapiens OX=9606 GN=PGAM1 PE=1 SV=2	2	19	19	15	13	13	14	13	13	13	13	13	11	13	14	11	13	13	12	12	13	13	13	14	13	12	13	13	12	14	13	15	14	14	15	15	14	14	16	16	15	16
P18754;P18754-2	P18754;P18754-2	5;5	5;5	5;5	Regulator of chromosome condensation	RCC1	sp|P18754|RCC1_HUMAN Regulator of chromosome condensation OS=Homo sapiens OX=9606 GN=RCC1 PE=1 SV=1;sp|P18754-2|RCC1_HUMAN Isoform 2 of Regulator of chromosome condensation OS=Homo sapiens OX=9606 GN=RCC1	2	5	5	5	1	1	1	3	2	2	1	2	2	0	1	1	2	2	2	2	2	1	1	2	1	2	2	2	3	2	2	3	3	2	2	2	2	2	2	2	1	3
P19022-2;P19022;P55283-2;P55283	P19022-2;P19022	10;10;2;2	10;10;2;2	10;10;2;2	Cadherin-2	CDH2	sp|P19022-2|CADH2_HUMAN Isoform 2 of Cadherin-2 OS=Homo sapiens OX=9606 GN=CDH2;sp|P19022|CADH2_HUMAN Cadherin-2 OS=Homo sapiens OX=9606 GN=CDH2 PE=1 SV=4	4	10	10	10	6	5	4	4	4	4	3	4	4	5	4	5	4	4	5	5	3	5	4	5	4	7	5	5	4	5	5	6	6	4	5	6	6	7	5	4	4	4
P19086	P19086	5	5	5	Guanine nucleotide-binding protein G(z) subunit alpha	GNAZ	sp|P19086|GNAZ_HUMAN Guanine nucleotide-binding protein G(z) subunit alpha OS=Homo sapiens OX=9606 GN=GNAZ PE=1 SV=3	1	5	5	5	3	3	4	4	3	4	4	4	4	4	4	4	4	4	4	4	3	4	3	4	4	4	4	3	4	4	3	4	4	4	4	4	3	4	4	4	3	3
P19087	P19087	7	2	1	Guanine nucleotide-binding protein G(t) subunit alpha-2	GNAT2	sp|P19087|GNAT2_HUMAN Guanine nucleotide-binding protein G(t) subunit alpha-2 OS=Homo sapiens OX=9606 GN=GNAT2 PE=1 SV=4	1	7	2	1	4	5	4	5	5	5	4	4	5	4	3	4	5	4	3	4	5	5	4	4	4	5	4	4	5	5	3	5	5	4	6	5	3	5	5	3	3	4
P19130	P19130	2	2	2			sp|P19130|FRIH_PIG Ferritin heavy chain OS=Sus scrofa OX=9823 GN=FTH1 PE=1 SV=3	1	2	2	2	0	1	0	1	1	0	1	1	0	1	1	1	0	1	1	1	0	0	1	1	0	0	1	1	1	0	1	1	0	0	1	1	1	0	0	1	2	0
P19133	P19133	3	3	3			sp|P19133|FRIL_PIG Ferritin light chain (Fragment) OS=Sus scrofa OX=9823 GN=FTL PE=1 SV=1	1	3	3	3	0	1	2	3	1	1	1	2	2	2	1	1	0	1	1	2	1	1	2	1	1	1	1	1	1	1	3	2	1	1	1	2	1	2	2	2	0	1
P19174;P19174-2	P19174;P19174-2	4;4	4;4	4;4	1-phosphatidylinositol 4,5-bisphosphate phosphodiesterase gamma-1	PLCG1	sp|P19174|PLCG1_HUMAN 1-phosphatidylinositol 4,5-bisphosphate phosphodiesterase gamma-1 OS=Homo sapiens OX=9606 GN=PLCG1 PE=1 SV=1;sp|P19174-2|PLCG1_HUMAN Isoform 2 of 1-phosphatidylinositol 4,5-bisphosphate phosphodiesterase gamma-1 OS=Homo sapiens OX=960	2	4	4	4	0	1	1	0	2	1	0	0	1	0	0	0	1	1	1	0	1	2	0	0	1	0	1	0	1	1	0	1	1	0	1	1	2	1	0	0	3	2
P19205;P13798	P19205	12;4	12;4	12;4			sp|P19205|ACPH_PIG Acylamino-acid-releasing enzyme OS=Sus scrofa OX=9823 GN=APEH PE=1 SV=2	2	12	12	12	7	8	4	5	5	2	5	5	6	5	4	5	5	5	5	5	5	3	6	6	4	6	5	7	6	3	7	7	7	5	6	6	7	6	4	7	4	6
P19338	P19338	13	13	13	Nucleolin	NCL	sp|P19338|NUCL_HUMAN Nucleolin OS=Homo sapiens OX=9606 GN=NCL PE=1 SV=3	1	13	13	13	4	6	5	5	3	5	5	4	3	5	4	7	5	5	7	5	4	5	5	4	3	5	4	4	5	5	7	7	5	6	7	8	5	5	6	6	4	5
P19367;P19367-4;P19367-2;P19367-3	P19367;P19367-4;P19367-2;P19367-3	25;24;24;24	25;24;24;24	18;17;17;17	Hexokinase-1	HK1	sp|P19367|HXK1_HUMAN Hexokinase-1 OS=Homo sapiens OX=9606 GN=HK1 PE=1 SV=3;sp|P19367-4|HXK1_HUMAN Isoform 4 of Hexokinase-1 OS=Homo sapiens OX=9606 GN=HK1;sp|P19367-2|HXK1_HUMAN Isoform 2 of Hexokinase-1 OS=Homo sapiens OX=9606 GN=HK1;sp|P19367-3|HXK1_HUMA	4	25	25	18	15	15	17	17	15	17	16	17	12	16	17	19	14	14	16	17	14	17	18	19	15	17	17	18	17	15	17	17	15	17	17	20	15	15	13	19	16	16
P19387	P19387	4	4	4	DNA-directed RNA polymerase II subunit RPB3	POLR2C	sp|P19387|RPB3_HUMAN DNA-directed RNA polymerase II subunit RPB3 OS=Homo sapiens OX=9606 GN=POLR2C PE=1 SV=2	1	4	4	4	3	1	1	1	2	2	0	1	2	2	1	2	3	2	1	1	3	1	1	1	3	2	3	1	3	3	2	2	1	3	2	3	3	1	2	2	2	2
P19388	P19388	1	1	1	DNA-directed RNA polymerases I, II, and III subunit RPABC1	POLR2E	sp|P19388|RPAB1_HUMAN DNA-directed RNA polymerases I, II, and III subunit RPABC1 OS=Homo sapiens OX=9606 GN=POLR2E PE=1 SV=4	1	1	1	1	0	0	1	0	1	1	1	0	1	1	1	0	1	0	1	0	1	1	1	0	1	1	1	0	1	1	1	1	1	1	1	1	1	1	1	0	1	1
P19404	P19404	10	10	10	NADH dehydrogenase [ubiquinone] flavoprotein 2, mitochondrial	NDUFV2	sp|P19404|NDUV2_HUMAN NADH dehydrogenase [ubiquinone] flavoprotein 2, mitochondrial OS=Homo sapiens OX=9606 GN=NDUFV2 PE=1 SV=2	1	10	10	10	6	6	6	7	6	7	7	6	7	7	6	6	6	7	6	8	7	7	7	7	7	6	7	5	7	6	7	8	8	6	7	8	7	7	8	7	7	7
P19525-2;P19525	P19525-2;P19525	1;1	1;1	1;1	Interferon-induced, double-stranded RNA-activated protein kinase	EIF2AK2	sp|P19525-2|E2AK2_HUMAN Isoform 2 of Interferon-induced, double-stranded RNA-activated protein kinase OS=Homo sapiens OX=9606 GN=EIF2AK2;sp|P19525|E2AK2_HUMAN Interferon-induced, double-stranded RNA-activated protein kinase OS=Homo sapiens OX=9606 GN=EIF2A	2	1	1	1	1	1	1	0	1	1	0	1	1	1	0	0	1	1	0	1	1	0	1	1	1	0	0	0	1	1	0	1	1	1	1	1	1	1	1	1	1	1
P19619;P04083	P19619	10;3	10;3	10;3			sp|P19619|ANXA1_PIG Annexin A1 OS=Sus scrofa OX=9823 GN=ANXA1 PE=1 SV=3	2	10	10	10	7	7	7	6	7	6	5	4	6	6	5	3	7	5	5	3	7	6	5	6	5	6	5	5	7	6	5	7	6	5	5	5	7	7	6	4	6	7
P19620;P07355;P07355-2;A6NMY6	P19620;P07355;P07355-2	15;11;11;6	15;11;11;6	15;11;11;6	Annexin A2	ANXA2	sp|P19620|ANXA2_PIG Annexin A2 OS=Sus scrofa OX=9823 GN=ANXA2 PE=1 SV=4;sp|P07355|ANXA2_HUMAN Annexin A2 OS=Homo sapiens OX=9606 GN=ANXA2 PE=1 SV=2;sp|P07355-2|ANXA2_HUMAN Isoform 2 of Annexin A2 OS=Homo sapiens OX=9606 GN=ANXA2	4	15	15	15	8	6	7	6	7	6	8	6	6	7	7	4	6	8	6	6	7	7	9	7	8	7	7	7	7	7	7	6	8	7	10	8	8	7	9	8	7	9
P19623	P19623	4	4	4	Spermidine synthase	SRM	sp|P19623|SPEE_HUMAN Spermidine synthase OS=Homo sapiens OX=9606 GN=SRM PE=1 SV=1	1	4	4	4	0	0	0	0	0	1	0	1	0	1	0	0	0	0	0	0	0	0	0	0	0	0	0	0	0	0	0	0	0	0	0	0	1	0	0	0	0	0
P19784	P19784	8	8	8	Casein kinase II subunit alpha	CSNK2A2	sp|P19784|CSK22_HUMAN Casein kinase II subunit alpha OS=Homo sapiens OX=9606 GN=CSNK2A2 PE=1 SV=1	1	8	8	8	2	3	3	3	2	2	3	0	3	2	2	1	3	2	2	2	2	5	2	1	2	2	1	1	3	2	1	1	2	1	3	4	1	1	2	3	1	3
P19838-2;P19838;P19838-3	P19838-2;P19838;P19838-3	2;2;1	2;2;1	2;2;1	Nuclear factor NF-kappa-B p105 subunit;Nuclear factor NF-kappa-B p50 subunit	NFKB1	sp|P19838-2|NFKB1_HUMAN Isoform 2 of Nuclear factor NF-kappa-B p105 subunit OS=Homo sapiens OX=9606 GN=NFKB1;sp|P19838|NFKB1_HUMAN Nuclear factor NF-kappa-B p105 subunit OS=Homo sapiens OX=9606 GN=NFKB1 PE=1 SV=2;sp|P19838-3|NFKB1_HUMAN Isoform 3 of Nuclea	3	2	2	2	0	0	0	0	0	0	0	0	0	0	0	0	0	0	0	0	0	0	0	0	0	1	0	0	0	0	0	0	0	0	0	1	0	0	0	0	0	0
P19900;Q9YTR8	P19900;Q9YTR8	1;1	1;1	1;1			sp|P19900|CAPSH_ADE12 Hexon protein OS=Human adenovirus A serotype 12 OX=28282 GN=L3 PE=3 SV=2;sp|Q9YTR8|CAPSH_ADEP3 Hexon protein OS=Porcine adenovirus A serotype 3 OX=35265 GN=L3 PE=3 SV=1	2	1	1	1	0	0	0	0	0	0	0	0	0	0	0	0	0	0	0	0	0	0	0	0	0	0	0	0	0	0	0	0	0	0	0	0	0	0	0	0	0	0
P20020-4;P20020-1;P20020-6;P20020;P20020-5;P20020-2	P20020-4;P20020-1;P20020-6;P20020;P20020-5;P20020-2	23;23;22;22;20;20	2;2;1;1;2;2	2;2;1;1;2;2	Plasma membrane calcium-transporting ATPase 1	ATP2B1	sp|P20020-4|AT2B1_HUMAN Isoform C of Plasma membrane calcium-transporting ATPase 1 OS=Homo sapiens OX=9606 GN=ATP2B1;sp|P20020-1|AT2B1_HUMAN Isoform D of Plasma membrane calcium-transporting ATPase 1 OS=Homo sapiens OX=9606 GN=ATP2B1;sp|P20020-6|AT2B1_HUMA	6	23	2	2	13	14	14	14	13	12	10	12	10	10	10	10	14	10	13	14	12	11	11	10	12	12	12	13	14	10	13	13	11	8	14	16	13	11	10	10	12	13
P20042	P20042	5	5	5	Eukaryotic translation initiation factor 2 subunit 2	EIF2S2	sp|P20042|IF2B_HUMAN Eukaryotic translation initiation factor 2 subunit 2 OS=Homo sapiens OX=9606 GN=EIF2S2 PE=1 SV=2	1	5	5	5	3	1	2	2	2	3	0	3	0	1	2	0	2	2	1	3	2	2	2	2	2	2	1	1	3	1	1	3	3	1	3	2	2	1	1	2	1	2
P20073-2;P20073	P20073-2;P20073	3;3	3;3	3;3	Annexin A7	ANXA7	sp|P20073-2|ANXA7_HUMAN Isoform 2 of Annexin A7 OS=Homo sapiens OX=9606 GN=ANXA7;sp|P20073|ANXA7_HUMAN Annexin A7 OS=Homo sapiens OX=9606 GN=ANXA7 PE=1 SV=3	2	3	3	3	0	1	1	2	0	2	2	2	1	2	2	2	0	2	2	2	0	2	1	2	0	2	2	2	1	2	2	2	1	2	2	1	1	1	3	3	2	0
P20112;P09486	P20112;P09486	3;2	3;2	3;2	SPARC	SPARC	sp|P20112|SPRC_PIG SPARC OS=Sus scrofa OX=9823 GN=SPARC PE=1 SV=2;sp|P09486|SPRC_HUMAN SPARC OS=Homo sapiens OX=9606 GN=SPARC PE=1 SV=1	2	3	3	3	1	1	0	0	1	1	2	0	1	0	1	1	0	2	1	0	1	2	1	0	0	0	0	0	2	1	1	0	1	0	0	0	1	2	2	2	0	1
P20290-2;P20290	P20290-2;P20290	5;5	5;5	5;5	Transcription factor BTF3	BTF3	sp|P20290-2|BTF3_HUMAN Isoform 2 of Transcription factor BTF3 OS=Homo sapiens OX=9606 GN=BTF3;sp|P20290|BTF3_HUMAN Transcription factor BTF3 OS=Homo sapiens OX=9606 GN=BTF3 PE=1 SV=1	2	5	5	5	3	4	2	2	2	3	2	2	2	2	2	3	2	2	2	2	2	2	1	2	2	1	2	2	5	1	2	1	4	2	1	3	4	4	2	2	3	2
P20305;P20305-2;CON__Q3SX14	P20305;P20305-2	15;14;6	15;14;6	9;8;2			sp|P20305|GELS_PIG Gelsolin (Fragment) OS=Sus scrofa OX=9823 GN=GSN PE=1 SV=1;sp|P20305-2|GELS_PIG Isoform 2 of Gelsolin OS=Sus scrofa OX=9823 GN=GSN	3	15	15	9	7	10	9	9	5	5	7	7	7	8	6	6	7	6	7	7	8	7	7	7	5	7	7	6	7	6	7	8	9	6	8	9	9	11	9	7	9	9
Q06AU3;P20336	Q06AU3;P20336	7;7	7;7	4;4	Ras-related protein Rab-3A	RAB3A	sp|Q06AU3|RAB3A_PIG Ras-related protein Rab-3A OS=Sus scrofa OX=9823 GN=RAB3A PE=2 SV=1;sp|P20336|RAB3A_HUMAN Ras-related protein Rab-3A OS=Homo sapiens OX=9606 GN=RAB3A PE=1 SV=1	2	7	7	4	7	5	5	6	5	5	5	6	5	5	6	6	6	6	6	6	5	6	6	6	6	6	5	6	6	6	5	6	6	6	6	6	5	5	6	5	6	4
P20337	P20337	3	2	2	Ras-related protein Rab-3B	RAB3B	sp|P20337|RAB3B_HUMAN Ras-related protein Rab-3B OS=Homo sapiens OX=9606 GN=RAB3B PE=1 SV=2	1	3	2	2	1	0	0	0	0	0	0	0	1	0	0	0	0	1	0	0	0	0	1	0	1	0	0	0	0	0	0	0	1	0	0	0	1	0	1	0	1	0
P20338	P20338	2	1	1	Ras-related protein Rab-4A	RAB4A	sp|P20338|RAB4A_HUMAN Ras-related protein Rab-4A OS=Homo sapiens OX=9606 GN=RAB4A PE=1 SV=3	1	2	1	1	1	1	1	2	2	1	2	2	0	2	1	1	0	2	2	2	0	1	2	2	1	2	2	2	1	1	2	2	1	2	2	2	0	2	2	2	1	2
Q06AU6;P20339;P20339-2	Q06AU6;P20339;P20339-2	8;8;7	8;8;7	5;5;4	Ras-related protein Rab-5A	RAB5A	sp|Q06AU6|RAB5A_PIG Ras-related protein Rab-5A OS=Sus scrofa OX=9823 GN=RAB5A PE=2 SV=1;sp|P20339|RAB5A_HUMAN Ras-related protein Rab-5A OS=Homo sapiens OX=9606 GN=RAB5A PE=1 SV=2;sp|P20339-2|RAB5A_HUMAN Isoform 2 of Ras-related protein Rab-5A OS=Homo sapi	3	8	8	5	4	5	4	7	4	6	5	3	4	4	4	4	4	6	5	5	5	5	4	4	6	5	5	4	4	5	4	5	5	4	6	4	4	5	4	5	3	4
P20340;P20340-3;Q14964	P20340	6;2;1	1;0;0	1;0;0	Ras-related protein Rab-6A	RAB6A	sp|P20340|RAB6A_HUMAN Ras-related protein Rab-6A OS=Homo sapiens OX=9606 GN=RAB6A PE=1 SV=3	3	6	1	1	3	3	2	1	3	1	2	1	3	4	2	5	3	4	1	1	3	3	1	2	2	4	2	3	2	4	2	1	1	2	3	2	4	3	2	1	3	2
P20340-2;P20340-4;Q53S08;Q9H0N0	P20340-2;P20340-4	6;5;1;1	6;5;1;1	1;1;1;1	Ras-related protein Rab-6A	RAB6A	sp|P20340-2|RAB6A_HUMAN Isoform 2 of Ras-related protein Rab-6A OS=Homo sapiens OX=9606 GN=RAB6A;sp|P20340-4|RAB6A_HUMAN Isoform 4 of Ras-related protein Rab-6A OS=Homo sapiens OX=9606 GN=RAB6A	4	6	6	1	4	4	2	1	4	1	3	1	4	4	3	5	4	4	1	1	4	3	1	2	2	5	3	3	3	5	3	2	1	2	4	3	4	4	3	1	3	2
P20472	P20472	3	3	3	Parvalbumin alpha	PVALB	sp|P20472|PRVA_HUMAN Parvalbumin alpha OS=Homo sapiens OX=9606 GN=PVALB PE=1 SV=2	1	3	3	3	2	3	1	2	2	2	1	2	2	3	2	1	2	2	2	2	1	2	2	2	1	2	3	2	2	2	2	2	2	1	2	3	2	2	1	2	2	2
P20585	P20585	3	3	3	DNA mismatch repair protein Msh3	MSH3	sp|P20585|MSH3_HUMAN DNA mismatch repair protein Msh3 OS=Homo sapiens OX=9606 GN=MSH3 PE=1 SV=4	1	3	3	3	0	0	1	0	0	1	0	0	0	0	0	0	0	1	1	0	0	1	0	1	0	1	0	0	0	1	0	0	1	0	0	0	1	1	1	0	0	1
P20618	P20618	5	5	5	Proteasome subunit beta type-1	PSMB1	sp|P20618|PSB1_HUMAN Proteasome subunit beta type-1 OS=Homo sapiens OX=9606 GN=PSMB1 PE=1 SV=2	1	5	5	5	5	4	4	4	4	5	4	5	3	5	5	5	4	4	5	5	5	5	4	5	4	4	5	5	5	5	5	5	5	4	5	5	5	5	3	4	3	5
P20645	P20645	2	2	2	Cation-dependent mannose-6-phosphate receptor	M6PR	sp|P20645|MPRD_HUMAN Cation-dependent mannose-6-phosphate receptor OS=Homo sapiens OX=9606 GN=M6PR PE=1 SV=1	1	2	2	2	0	0	0	0	0	0	1	1	0	0	0	1	0	0	1	1	0	0	1	1	0	0	0	1	0	0	0	1	1	0	1	1	0	0	0	0	0	0
P20674	P20674	3	3	3	Cytochrome c oxidase subunit 5A, mitochondrial	COX5A	sp|P20674|COX5A_HUMAN Cytochrome c oxidase subunit 5A, mitochondrial OS=Homo sapiens OX=9606 GN=COX5A PE=1 SV=2	1	3	3	3	2	2	0	2	2	2	1	2	2	0	1	1	2	2	1	3	2	1	1	2	3	2	1	1	3	1	2	2	2	2	1	2	2	2	2	1	2	2
P20700	P20700	21	21	21	Lamin-B1	LMNB1	sp|P20700|LMNB1_HUMAN Lamin-B1 OS=Homo sapiens OX=9606 GN=LMNB1 PE=1 SV=2	1	21	21	21	6	8	11	11	9	9	10	13	8	9	10	13	9	9	9	9	9	12	9	8	10	9	10	12	10	11	13	17	11	12	15	15	7	9	9	13	9	10
P20735	P20735	1	1	1			sp|P20735|GGT1_PIG Glutathione hydrolase 1 proenzyme OS=Sus scrofa OX=9823 GN=GGT1 PE=2 SV=1	1	1	1	1	1	0	0	0	0	0	0	0	0	0	0	0	0	0	0	0	1	1	0	0	0	0	0	0	0	0	0	0	0	0	0	0	0	0	0	0	0	0
P20794-3;P20794;P20794-2	P20794-3;P20794;P20794-2	3;3;3	3;3;3	3;3;3	Serine/threonine-protein kinase MAK	MAK	sp|P20794-3|MAK_HUMAN Isoform 3 of Serine/threonine-protein kinase MAK OS=Homo sapiens OX=9606 GN=MAK;sp|P20794|MAK_HUMAN Serine/threonine-protein kinase MAK OS=Homo sapiens OX=9606 GN=MAK PE=1 SV=2;sp|P20794-2|MAK_HUMAN Isoform 2 of Serine/threonine-prote	3	3	3	3	1	1	1	1	1	1	0	1	1	1	0	0	0	0	1	1	1	2	3	1	1	1	1	1	1	1	1	1	2	0	1	2	1	2	1	1	0	0
P20839;P20839-3;P20839-7;P20839-5;P20839-6;P20839-2;P20839-4	P20839;P20839-3;P20839-7;P20839-5;P20839-6;P20839-2;P20839-4	15;15;15;15;15;14;14	15;15;15;15;15;14;14	14;14;14;14;14;13;13	Inosine-5-monophosphate dehydrogenase 1	IMPDH1	sp|P20839|IMDH1_HUMAN Inosine-5-monophosphate dehydrogenase 1 OS=Homo sapiens OX=9606 GN=IMPDH1 PE=1 SV=2;sp|P20839-3|IMDH1_HUMAN Isoform 3 of Inosine-5-monophosphate dehydrogenase 1 OS=Homo sapiens OX=9606 GN=IMPDH1;sp|P20839-7|IMDH1_HUMAN Isoform 7 of	7	15	15	14	9	10	12	13	11	12	10	11	9	11	10	11	11	11	10	12	11	11	9	11	12	11	10	10	11	10	10	12	11	11	12	11	9	12	11	12	10	11
P20908-2;P20908	P20908-2;P20908	2;2	2;2	2;2	Collagen alpha-1(V) chain	COL5A1	sp|P20908-2|CO5A1_HUMAN Isoform 2 of Collagen alpha-1(V) chain OS=Homo sapiens OX=9606 GN=COL5A1;sp|P20908|CO5A1_HUMAN Collagen alpha-1(V) chain OS=Homo sapiens OX=9606 GN=COL5A1 PE=1 SV=3	2	2	2	2	2	1	1	0	1	2	0	0	0	0	0	0	0	1	0	0	1	1	0	0	0	0	0	0	1	0	0	0	0	0	1	0	0	1	1	1	0	0
P20936-2;P20936-4;P20936;P20936-3	P20936-2;P20936-4;P20936	10;10;10;3	10;10;10;3	10;10;10;3	Ras GTPase-activating protein 1	RASA1	sp|P20936-2|RASA1_HUMAN Isoform 2 of Ras GTPase-activating protein 1 OS=Homo sapiens OX=9606 GN=RASA1;sp|P20936-4|RASA1_HUMAN Isoform 4 of Ras GTPase-activating protein 1 OS=Homo sapiens OX=9606 GN=RASA1;sp|P20936|RASA1_HUMAN Ras GTPase-activating protein	4	10	10	10	2	4	3	2	2	4	1	2	2	2	1	1	2	6	1	3	3	3	3	1	2	6	2	1	4	5	3	2	2	4	3	5	1	2	3	2	1	1
P20962	P20962	1	1	1	Parathymosin	PTMS	sp|P20962|PTMS_HUMAN Parathymosin OS=Homo sapiens OX=9606 GN=PTMS PE=1 SV=2	1	1	1	1	1	1	1	1	1	1	1	1	1	1	1	1	1	1	1	1	1	1	1	1	1	1	1	1	1	1	1	1	1	1	1	1	1	1	1	0	1	1
P21127;Q9UQ88-5;Q9UQ88;P21127-2;P21127-3;Q9UQ88-2;Q9UQ88-3;P21127-8;Q9UQ88-4;P21127-9;P21127-6;P21127-10;P21127-5;P21127-4;Q9UQ88-10;P21127-12;Q9UQ88-9;Q9UQ88-8	P21127;Q9UQ88-5;Q9UQ88;P21127-2;P21127-3;Q9UQ88-2;Q9UQ88-3;P21127-8;Q9UQ88-4;P21127-9;P21127-6;P21127-10;P21127-5;P21127-4;Q9UQ88-10;P21127-12;Q9UQ88-9;Q9UQ88-8	2;2;2;2;2;2;2;2;2;2;2;2;2;2;2;2;1;1	2;2;2;2;2;2;2;2;2;2;2;2;2;2;2;2;1;1	2;2;2;2;2;2;2;2;2;2;2;2;2;2;2;2;1;1	Cyclin-dependent kinase 11B;Cyclin-dependent kinase 11A	CDK11B;CDK11A	sp|P21127|CD11B_HUMAN Cyclin-dependent kinase 11B OS=Homo sapiens OX=9606 GN=CDK11B PE=1 SV=4;sp|Q9UQ88-5|CD11A_HUMAN Isoform SV7 of Cyclin-dependent kinase 11A OS=Homo sapiens OX=9606 GN=CDK11A;sp|Q9UQ88|CD11A_HUMAN Cyclin-dependent kinase 11A OS=Homo sap	18	2	2	2	0	0	1	0	0	0	0	0	0	0	0	1	0	1	0	0	0	0	0	0	0	0	0	0	0	0	0	1	0	0	1	1	0	0	1	0	0	0
P21281	P21281	22	22	16	V-type proton ATPase subunit B, brain isoform	ATP6V1B2	sp|P21281|VATB2_HUMAN V-type proton ATPase subunit B, brain isoform OS=Homo sapiens OX=9606 GN=ATP6V1B2 PE=1 SV=3	1	22	22	16	13	13	15	16	15	14	16	15	12	14	13	15	15	15	13	16	12	14	15	16	13	16	14	14	11	14	14	13	15	16	14	16	13	14	14	15	13	14
P21283	P21283	9	9	8	V-type proton ATPase subunit C 1	ATP6V1C1	sp|P21283|VATC1_HUMAN V-type proton ATPase subunit C 1 OS=Homo sapiens OX=9606 GN=ATP6V1C1 PE=1 SV=4	1	9	9	8	6	6	4	3	5	8	6	5	5	3	4	5	7	5	4	4	5	6	6	3	6	7	3	6	5	7	6	6	8	5	5	6	5	5	6	5	4	6
P21291	P21291	4	4	4	Cysteine and glycine-rich protein 1	CSRP1	sp|P21291|CSRP1_HUMAN Cysteine and glycine-rich protein 1 OS=Homo sapiens OX=9606 GN=CSRP1 PE=1 SV=3	1	4	4	4	1	2	1	2	2	1	1	2	2	1	2	4	2	1	1	2	2	1	2	3	2	1	2	3	2	1	2	2	3	1	2	3	1	1	1	1	1	1
P21333-2;P21333	P21333-2;P21333	48;48	48;48	45;45	Filamin-A	FLNA	sp|P21333-2|FLNA_HUMAN Isoform 2 of Filamin-A OS=Homo sapiens OX=9606 GN=FLNA;sp|P21333|FLNA_HUMAN Filamin-A OS=Homo sapiens OX=9606 GN=FLNA PE=1 SV=4	2	48	48	45	18	19	15	24	18	15	17	25	18	16	22	27	20	20	20	22	22	18	20	24	17	18	20	20	22	21	23	25	20	17	26	32	21	23	27	23	17	21
P21359-2;P21359-6;P21359;P21359-4;P21359-3;P21359-5	P21359-2;P21359-6;P21359;P21359-4	15;15;15;8;3;3	15;15;15;8;3;3	15;15;15;8;3;3	Neurofibromin;Neurofibromin truncated	NF1	sp|P21359-2|NF1_HUMAN Isoform I of Neurofibromin OS=Homo sapiens OX=9606 GN=NF1;sp|P21359-6|NF1_HUMAN Isoform 6 of Neurofibromin OS=Homo sapiens OX=9606 GN=NF1;sp|P21359|NF1_HUMAN Neurofibromin OS=Homo sapiens OX=9606 GN=NF1 PE=1 SV=2;sp|P21359-4|NF1_HUMAN	6	15	15	15	5	5	1	2	2	2	2	1	1	2	0	1	3	2	1	2	3	1	1	3	4	2	3	2	3	3	1	1	3	3	3	5	3	2	2	3	3	2
P21399	P21399	5	5	5	Cytoplasmic aconitate hydratase	ACO1	sp|P21399|ACOC_HUMAN Cytoplasmic aconitate hydratase OS=Homo sapiens OX=9606 GN=ACO1 PE=1 SV=3	1	5	5	5	2	3	1	2	2	3	2	2	1	3	0	0	1	2	2	2	3	2	1	1	1	0	0	0	2	2	0	1	2	2	1	2	3	3	2	0	3	3
P21579	P21579	19	19	12	Synaptotagmin-1	SYT1	sp|P21579|SYT1_HUMAN Synaptotagmin-1 OS=Homo sapiens OX=9606 GN=SYT1 PE=1 SV=1	1	19	19	12	10	13	11	14	11	13	12	12	11	11	11	13	12	12	11	14	11	12	11	15	14	10	10	13	12	11	14	15	11	12	12	14	12	10	12	13	10	12
P21589-2;P21589	P21589-2;P21589	3;3	3;3	3;3	5-nucleotidase	NT5E	sp|P21589-2|5NTD_HUMAN Isoform 2 of 5-nucleotidase OS=Homo sapiens OX=9606 GN=NT5E;sp|P21589|5NTD_HUMAN 5-nucleotidase OS=Homo sapiens OX=9606 GN=NT5E PE=1 SV=1	2	3	3	3	1	0	0	1	0	1	1	0	0	1	0	0	0	0	2	0	0	1	0	1	0	0	1	0	0	2	2	1	0	1	1	2	0	0	1	1	1	1
P21695-2;P21695	P21695-2;P21695	2;2	2;2	2;2	Glycerol-3-phosphate dehydrogenase [NAD(+)], cytoplasmic	GPD1	sp|P21695-2|GPDA_HUMAN Isoform 2 of Glycerol-3-phosphate dehydrogenase [NAD(+)], cytoplasmic OS=Homo sapiens OX=9606 GN=GPD1;sp|P21695|GPDA_HUMAN Glycerol-3-phosphate dehydrogenase [NAD(+)], cytoplasmic OS=Homo sapiens OX=9606 GN=GPD1 PE=1 SV=4	2	2	2	2	0	0	1	0	1	0	0	0	0	0	0	1	0	1	0	0	0	0	0	0	0	0	0	0	1	0	0	0	0	0	0	0	0	0	0	0	0	0
P21953;P21953-2	P21953;P21953-2	3;2	3;2	3;2	2-oxoisovalerate dehydrogenase subunit beta, mitochondrial	BCKDHB	sp|P21953|ODBB_HUMAN 2-oxoisovalerate dehydrogenase subunit beta, mitochondrial OS=Homo sapiens OX=9606 GN=BCKDHB PE=1 SV=2;sp|P21953-2|ODBB_HUMAN Isoform 2 of 2-oxoisovalerate dehydrogenase subunit beta, mitochondrial OS=Homo sapiens OX=9606 GN=BCKDHB	2	3	3	3	1	0	1	0	1	1	1	1	2	0	2	2	1	1	1	1	1	2	0	1	3	1	1	1	2	1	0	0	1	1	1	1	1	2	1	0	1	1
P21980-3;P21980-2;P21980	P21980-3;P21980-2;P21980	2;2;2	2;2;2	2;2;2	Protein-glutamine gamma-glutamyltransferase 2	TGM2	sp|P21980-3|TGM2_HUMAN Isoform 3 of Protein-glutamine gamma-glutamyltransferase 2 OS=Homo sapiens OX=9606 GN=TGM2;sp|P21980-2|TGM2_HUMAN Isoform 2 of Protein-glutamine gamma-glutamyltransferase 2 OS=Homo sapiens OX=9606 GN=TGM2;sp|P21980|TGM2_HUMAN Protein	3	2	2	2	0	1	0	0	0	1	1	0	1	0	0	0	1	1	0	0	0	1	1	1	0	1	0	0	1	0	0	1	1	0	1	0	0	1	1	0	1	1
P21999;P14057;P08651-4;P08651-5;P08651-3;P08651-6;P08651-2;P08651	P21999;P14057;P08651-4;P08651-5;P08651-3;P08651-6;P08651-2;P08651	2;1;1;1;1;1;1;1	2;1;1;1;1;1;1;1	2;1;1;1;1;1;1;1	Nuclear factor 1 C-type	NFIC	sp|P21999|NFIC_PIG Nuclear factor 1 C-type OS=Sus scrofa OX=9823 GN=NFIC PE=3 SV=1;sp|P14057|NFIL_PIG Nuclear factor 1 (Fragment) OS=Sus scrofa OX=9823 GN=NFI PE=1 SV=1;sp|P08651-4|NFIC_HUMAN Isoform 3 of Nuclear factor 1 C-type OS=Homo sapiens OX=9606 GN=	8	2	2	2	1	0	1	0	1	0	0	0	0	0	0	0	0	1	0	1	0	0	0	0	0	0	0	0	0	0	0	0	1	0	0	1	1	0	0	1	0	0
P22033	P22033	3	1	1	Methylmalonyl-CoA mutase, mitochondrial	MUT	sp|P22033|MUTA_HUMAN Methylmalonyl-CoA mutase, mitochondrial OS=Homo sapiens OX=9606 GN=MMUT PE=1 SV=4	1	3	1	1	1	0	0	0	0	1	1	0	0	1	0	0	0	0	1	1	0	1	0	1	0	0	0	0	0	0	0	0	0	0	0	0	1	0	1	1	0	2
P22059;Q969R2-4;Q969R2-6;Q969R2-3;Q969R2-2;Q969R2	P22059	5;1;1;1;1;1	5;1;1;1;1;1	4;0;0;0;0;0	Oxysterol-binding protein 1	OSBP	sp|P22059|OSBP1_HUMAN Oxysterol-binding protein 1 OS=Homo sapiens OX=9606 GN=OSBP PE=1 SV=1	6	5	5	4	1	0	1	1	1	0	1	0	2	1	1	0	1	1	1	1	1	2	1	1	0	0	1	1	2	2	2	2	1	1	2	4	2	1	2	1	2	1
P22087	P22087	6	6	5	rRNA 2-O-methyltransferase fibrillarin	FBL	sp|P22087|FBRL_HUMAN rRNA 2-O-methyltransferase fibrillarin OS=Homo sapiens OX=9606 GN=FBL PE=1 SV=2	1	6	6	5	2	4	2	4	2	4	3	4	3	3	2	4	2	3	2	2	2	4	3	4	3	3	3	3	5	2	2	3	3	4	4	4	3	3	3	4	2	3
P22102;P22102-2	P22102	5;1	5;1	5;1	Trifunctional purine biosynthetic protein adenosine-3;Phosphoribosylamine--glycine ligase;Phosphoribosylformylglycinamidine cyclo-ligase;Phosphoribosylglycinamide formyltransferase	GART	sp|P22102|PUR2_HUMAN Trifunctional purine biosynthetic protein adenosine-3 OS=Homo sapiens OX=9606 GN=GART PE=1 SV=1	2	5	5	5	4	3	3	0	4	1	1	3	3	1	2	1	3	2	2	0	4	3	0	2	4	2	0	2	4	4	2	3	4	2	1	2	3	3	2	2	4	1
P22234;P22234-2	P22234;P22234-2	4;4	4;4	4;4	Multifunctional protein ADE2;Phosphoribosylaminoimidazole-succinocarboxamide synthase;Phosphoribosylaminoimidazole carboxylase	PAICS	sp|P22234|PUR6_HUMAN Multifunctional protein ADE2 OS=Homo sapiens OX=9606 GN=PAICS PE=1 SV=3;sp|P22234-2|PUR6_HUMAN Isoform 2 of Multifunctional protein ADE2 OS=Homo sapiens OX=9606 GN=PAICS	2	4	4	4	2	3	4	2	3	3	4	3	4	4	3	4	2	4	4	3	2	4	4	3	4	4	4	3	4	4	4	3	4	3	4	3	4	4	4	4	4	4
P22303-4;P22303;P22303-2;P22303-3	P22303-4;P22303;P22303-2;P22303-3	2;2;2;1	2;2;2;1	2;2;2;1	Acetylcholinesterase	ACHE	sp|P22303-4|ACES_HUMAN Isoform R of Acetylcholinesterase OS=Homo sapiens OX=9606 GN=ACHE;sp|P22303|ACES_HUMAN Acetylcholinesterase OS=Homo sapiens OX=9606 GN=ACHE PE=1 SV=1;sp|P22303-2|ACES_HUMAN Isoform H of Acetylcholinesterase OS=Homo sapiens OX=9606 GN	4	2	2	2	0	1	0	1	2	1	1	1	1	2	0	0	2	2	1	1	2	2	1	1	1	2	1	1	2	2	1	2	1	1	1	1	0	1	0	0	1	0
P22307-6;P22307-2;P22307-4;P22307-7;P22307-8;P22307	P22307-6;P22307-2;P22307-4;P22307-7;P22307-8;P22307	3;3;3;3;3;3	3;3;3;3;3;3	3;3;3;3;3;3	Non-specific lipid-transfer protein	SCP2	sp|P22307-6|NLTP_HUMAN Isoform 6 of Non-specific lipid-transfer protein OS=Homo sapiens OX=9606 GN=SCP2;sp|P22307-2|NLTP_HUMAN Isoform SCP2 of Non-specific lipid-transfer protein OS=Homo sapiens OX=9606 GN=SCP2;sp|P22307-4|NLTP_HUMAN Isoform 4 of Non-speci	6	3	3	3	0	0	1	0	0	0	0	0	0	0	0	1	1	0	0	2	0	1	0	1	1	0	1	0	1	1	0	0	0	0	1	0	0	0	1	0	0	0
P22314-2;P22314	P22314-2;P22314	27;27	27;27	27;27	Ubiquitin-like modifier-activating enzyme 1	UBA1	sp|P22314-2|UBA1_HUMAN Isoform 2 of Ubiquitin-like modifier-activating enzyme 1 OS=Homo sapiens OX=9606 GN=UBA1;sp|P22314|UBA1_HUMAN Ubiquitin-like modifier-activating enzyme 1 OS=Homo sapiens OX=9606 GN=UBA1 PE=1 SV=3	2	27	27	27	15	13	14	18	11	14	15	16	13	13	15	13	15	17	16	13	14	12	18	15	12	16	13	17	16	13	15	17	13	15	17	20	12	13	15	13	15	12
P22392-2;P22392;O60361	P22392-2;P22392;O60361	6;5;3	2;1;0	0;0;0	Nucleoside diphosphate kinase B;Putative nucleoside diphosphate kinase	NME2;NME2P1	sp|P22392-2|NDKB_HUMAN Isoform 3 of Nucleoside diphosphate kinase B OS=Homo sapiens OX=9606 GN=NME2;sp|P22392|NDKB_HUMAN Nucleoside diphosphate kinase B OS=Homo sapiens OX=9606 GN=NME2 PE=1 SV=1;sp|O60361|NDK8_HUMAN Putative nucleoside diphosphate kinase O	3	6	2	0	5	6	6	5	4	5	6	6	4	5	5	5	4	6	6	6	5	6	5	6	4	5	6	6	5	6	6	6	4	5	6	6	5	6	6	6	4	5
P22415-2;P22415	P22415-2;P22415	2;2	2;2	1;1	Upstream stimulatory factor 1	USF1	sp|P22415-2|USF1_HUMAN Isoform 2 of Upstream stimulatory factor 1 OS=Homo sapiens OX=9606 GN=USF1;sp|P22415|USF1_HUMAN Upstream stimulatory factor 1 OS=Homo sapiens OX=9606 GN=USF1 PE=1 SV=1	2	2	2	1	0	0	0	0	0	1	0	0	0	1	0	0	0	1	0	0	0	1	0	0	0	1	1	0	0	0	0	0	1	0	1	0	0	0	0	0	0	0
P22459	P22459	1	1	1	Potassium voltage-gated channel subfamily A member 4	KCNA4	sp|P22459|KCNA4_HUMAN Potassium voltage-gated channel subfamily A member 4 OS=Homo sapiens OX=9606 GN=KCNA4 PE=1 SV=2	1	1	1	1	0	0	0	0	0	0	0	0	0	0	0	0	0	0	0	0	0	0	0	0	0	0	0	0	0	0	0	1	0	0	0	0	0	0	0	0	0	0
P22612	P22612	2	1	1	cAMP-dependent protein kinase catalytic subunit gamma	PRKACG	sp|P22612|KAPCG_HUMAN cAMP-dependent protein kinase catalytic subunit gamma OS=Homo sapiens OX=9606 GN=PRKACG PE=1 SV=3	1	2	1	1	1	1	1	1	1	1	1	0	1	1	1	2	0	1	0	0	0	0	1	0	0	1	1	0	1	1	0	1	1	2	1	1	2	0	1	0	2	1
P22626;P22626-2	P22626;P22626-2	17;16	17;16	17;16	Heterogeneous nuclear ribonucleoproteins A2/B1	HNRNPA2B1	sp|P22626|ROA2_HUMAN Heterogeneous nuclear ribonucleoproteins A2/B1 OS=Homo sapiens OX=9606 GN=HNRNPA2B1 PE=1 SV=2;sp|P22626-2|ROA2_HUMAN Isoform A2 of Heterogeneous nuclear ribonucleoproteins A2/B1 OS=Homo sapiens OX=9606 GN=HNRNPA2B1	2	17	17	17	11	13	13	14	11	13	13	13	9	11	11	11	10	13	12	13	11	13	13	13	13	12	12	13	13	13	13	13	12	14	14	15	11	13	13	12	13	13
P22670	P22670	2	2	2	MHC class II regulatory factor RFX1	RFX1	sp|P22670|RFX1_HUMAN MHC class II regulatory factor RFX1 OS=Homo sapiens OX=9606 GN=RFX1 PE=1 SV=2	1	2	2	2	0	0	0	0	0	0	0	0	0	0	0	0	0	0	0	0	0	1	0	0	0	0	0	0	0	0	0	0	0	1	0	0	0	1	0	0	0	0
P22676	P22676	13	13	12	Calretinin	CALB2	sp|P22676|CALB2_HUMAN Calretinin OS=Homo sapiens OX=9606 GN=CALB2 PE=2 SV=2	1	13	13	12	8	6	10	9	10	8	8	7	9	7	7	8	10	10	9	10	7	9	9	8	9	9	9	10	8	9	8	8	9	8	9	9	8	7	9	8	9	7
P22681	P22681	3	3	3	E3 ubiquitin-protein ligase CBL	CBL	sp|P22681|CBL_HUMAN E3 ubiquitin-protein ligase CBL OS=Homo sapiens OX=9606 GN=CBL PE=1 SV=2	1	3	3	3	0	0	0	0	0	0	0	0	0	0	0	0	0	0	0	0	0	0	0	0	0	0	0	0	0	0	0	1	0	0	0	0	0	0	0	0	0	0
P22695	P22695	3	3	3	Cytochrome b-c1 complex subunit 2, mitochondrial	UQCRC2	sp|P22695|QCR2_HUMAN Cytochrome b-c1 complex subunit 2, mitochondrial OS=Homo sapiens OX=9606 GN=UQCRC2 PE=1 SV=3	1	3	3	3	3	3	3	3	3	3	3	3	2	3	3	2	2	3	3	3	2	3	3	3	3	3	3	3	3	3	3	3	2	3	3	3	3	3	3	3	2	3
P23193;P23193-2	P23193;P23193-2	3;2	3;2	3;2	Transcription elongation factor A protein 1	TCEA1	sp|P23193|TCEA1_HUMAN Transcription elongation factor A protein 1 OS=Homo sapiens OX=9606 GN=TCEA1 PE=1 SV=2;sp|P23193-2|TCEA1_HUMAN Isoform 2 of Transcription elongation factor A protein 1 OS=Homo sapiens OX=9606 GN=TCEA1	2	3	3	3	1	2	2	2	2	2	2	1	2	2	1	1	2	2	2	2	2	2	2	2	2	2	2	2	2	2	2	2	2	2	2	2	1	2	2	2	1	2
P23220	P23220	23	23	2			sp|P23220|AT2B1_PIG Plasma membrane calcium-transporting ATPase 1 OS=Sus scrofa OX=9823 GN=ATP2B1 PE=2 SV=1	1	23	23	2	14	15	14	15	14	13	10	13	11	11	11	11	14	11	14	15	13	12	13	12	14	13	13	15	14	11	15	15	11	9	15	17	13	12	11	12	12	13
P23229-7;P23229-4;P23229-2;P23229-5;P23229-3;P23229-9;P23229-6;P23229	P23229-7;P23229-4;P23229-2;P23229-5;P23229-3;P23229-9;P23229-6;P23229	1;1;1;1;1;1;1;1	1;1;1;1;1;1;1;1	1;1;1;1;1;1;1;1	Integrin alpha-6;Integrin alpha-6 heavy chain;Integrin alpha-6 light chain;Processed integrin alpha-6	ITGA6	sp|P23229-7|ITA6_HUMAN Isoform 7 of Integrin alpha-6 OS=Homo sapiens OX=9606 GN=ITGA6;sp|P23229-4|ITA6_HUMAN Isoform Alpha-6X2A of Integrin alpha-6 OS=Homo sapiens OX=9606 GN=ITGA6;sp|P23229-2|ITA6_HUMAN Isoform Alpha-6X1A of Integrin alpha-6 OS=Homo sapie	8	1	1	1	0	0	0	0	0	0	0	1	1	0	0	0	0	1	0	1	0	1	0	1	0	1	0	1	1	1	1	1	0	0	1	1	0	1	0	0	0	0
P23246;P23246-2	P23246;P23246-2	14;12	14;12	14;12	Splicing factor, proline- and glutamine-rich	SFPQ	sp|P23246|SFPQ_HUMAN Splicing factor, proline- and glutamine-rich OS=Homo sapiens OX=9606 GN=SFPQ PE=1 SV=2;sp|P23246-2|SFPQ_HUMAN Isoform Short of Splicing factor, proline- and glutamine-rich OS=Homo sapiens OX=9606 GN=SFPQ	2	14	14	14	6	7	7	7	7	7	8	7	7	6	7	5	7	7	6	7	7	7	7	6	6	8	8	6	7	8	6	9	7	8	7	8	8	8	7	6	7	6
P23258;Q9NRH3	P23258;Q9NRH3	8;7	8;7	8;7	Tubulin gamma-1 chain;Tubulin gamma-2 chain	TUBG1;TUBG2	sp|P23258|TBG1_HUMAN Tubulin gamma-1 chain OS=Homo sapiens OX=9606 GN=TUBG1 PE=1 SV=2;sp|Q9NRH3|TBG2_HUMAN Tubulin gamma-2 chain OS=Homo sapiens OX=9606 GN=TUBG2 PE=2 SV=1	2	8	8	8	4	4	1	3	1	3	2	3	2	2	2	3	2	2	2	3	3	1	3	3	2	2	2	3	3	1	3	3	2	2	2	3	2	1	2	2	2	2
P23284	P23284	8	8	8	Peptidyl-prolyl cis-trans isomerase B	PPIB	sp|P23284|PPIB_HUMAN Peptidyl-prolyl cis-trans isomerase B OS=Homo sapiens OX=9606 GN=PPIB PE=1 SV=2	1	8	8	8	5	5	5	5	4	6	6	5	5	5	4	5	4	5	6	4	5	6	5	5	4	5	5	4	6	6	5	4	7	7	6	6	5	6	7	6	5	6
P23297	P23297	3	3	3	Protein S100-A1	S100A1	sp|P23297|S10A1_HUMAN Protein S100-A1 OS=Homo sapiens OX=9606 GN=S100A1 PE=1 SV=2	1	3	3	3	2	2	2	2	2	2	2	2	2	2	2	2	2	2	2	2	2	2	2	2	2	2	2	2	2	2	2	2	3	2	2	3	2	2	2	2	3	3
P23368-2;P23368	P23368-2;P23368	6;6	6;6	6;6	NAD-dependent malic enzyme, mitochondrial	ME2	sp|P23368-2|MAOM_HUMAN Isoform 2 of NAD-dependent malic enzyme, mitochondrial OS=Homo sapiens OX=9606 GN=ME2;sp|P23368|MAOM_HUMAN NAD-dependent malic enzyme, mitochondrial OS=Homo sapiens OX=9606 GN=ME2 PE=1 SV=1	2	6	6	6	2	0	0	0	0	1	1	1	1	0	1	2	2	1	1	0	1	1	1	1	0	0	1	0	1	1	0	2	1	1	1	2	2	1	1	0	0	0
P23378	P23378	8	8	8	Glycine dehydrogenase (decarboxylating), mitochondrial	GLDC	sp|P23378|GCSP_HUMAN Glycine dehydrogenase (decarboxylating), mitochondrial OS=Homo sapiens OX=9606 GN=GLDC PE=1 SV=2	1	8	8	8	4	4	1	4	5	2	3	2	3	2	4	2	4	6	3	3	6	3	2	3	4	3	3	3	6	1	4	4	4	4	3	4	5	4	5	3	4	3
P23381-2;P23381	P23381-2;P23381	4;4	4;4	4;4	Tryptophan--tRNA ligase, cytoplasmic;T1-TrpRS;T2-TrpRS	WARS	sp|P23381-2|SYWC_HUMAN Isoform 2 of Tryptophan--tRNA ligase, cytoplasmic OS=Homo sapiens OX=9606 GN=WARS1;sp|P23381|SYWC_HUMAN Tryptophan--tRNA ligase, cytoplasmic OS=Homo sapiens OX=9606 GN=WARS1 PE=1 SV=2	2	4	4	4	2	2	3	2	2	2	2	2	2	2	2	1	2	2	2	4	1	2	3	2	2	2	2	3	2	2	3	3	2	2	4	2	2	2	3	2	2	2
Q0Z8U2;P23396;P23396-2	Q0Z8U2;P23396;P23396-2	16;16;14	16;16;14	16;16;14	40S ribosomal protein S3	RPS3	sp|Q0Z8U2|RS3_PIG 40S ribosomal protein S3 OS=Sus scrofa OX=9823 GN=RPS3 PE=1 SV=1;sp|P23396|RS3_HUMAN 40S ribosomal protein S3 OS=Homo sapiens OX=9606 GN=RPS3 PE=1 SV=2;sp|P23396-2|RS3_HUMAN Isoform 2 of 40S ribosomal protein S3 OS=Homo sapiens OX=9606 GN	3	16	16	16	8	6	7	10	7	7	7	7	8	6	7	7	7	8	8	7	7	6	10	8	6	7	10	9	8	7	8	11	8	7	10	10	8	7	8	9	8	7
P23434	P23434	2	2	2	Glycine cleavage system H protein, mitochondrial	GCSH	sp|P23434|GCSH_HUMAN Glycine cleavage system H protein, mitochondrial OS=Homo sapiens OX=9606 GN=GCSH PE=1 SV=2	1	2	2	2	1	1	1	1	1	1	1	1	1	1	1	1	1	1	1	1	1	1	1	1	1	1	1	1	1	1	0	1	1	1	1	1	1	1	1	1	1	1
P23458	P23458	4	4	4	Tyrosine-protein kinase JAK1	JAK1	sp|P23458|JAK1_HUMAN Tyrosine-protein kinase JAK1 OS=Homo sapiens OX=9606 GN=JAK1 PE=1 SV=2	1	4	4	4	0	1	0	0	0	0	0	0	0	0	0	0	0	1	0	0	0	0	0	0	0	1	0	0	1	1	0	0	0	0	0	0	0	0	0	0	0	0
P23468;P23468-7;P23468-5;P23468-6;P23468-3;P23468-4	P23468;P23468-7;P23468-5;P23468-6;P23468-3;P23468-4	18;17;17;17;16;15	1;1;1;1;1;0	1;1;1;1;1;0	Receptor-type tyrosine-protein phosphatase delta	PTPRD	sp|P23468|PTPRD_HUMAN Receptor-type tyrosine-protein phosphatase delta OS=Homo sapiens OX=9606 GN=PTPRD PE=1 SV=2;sp|P23468-7|PTPRD_HUMAN Isoform 7 of Receptor-type tyrosine-protein phosphatase delta OS=Homo sapiens OX=9606 GN=PTPRD;sp|P23468-5|PTPRD_HUMAN	6	18	1	1	4	6	4	8	4	6	4	2	7	3	3	1	7	7	6	4	4	6	2	3	5	6	7	4	7	5	4	6	7	5	8	6	4	5	6	4	6	7
P23468-2	P23468-2	18	18	1	Receptor-type tyrosine-protein phosphatase delta	PTPRD	sp|P23468-2|PTPRD_HUMAN Isoform 2 of Receptor-type tyrosine-protein phosphatase delta OS=Homo sapiens OX=9606 GN=PTPRD	1	18	18	1	5	7	5	9	5	6	4	3	7	3	3	2	8	7	7	5	4	6	2	3	6	6	7	4	8	5	4	6	7	6	8	7	5	5	7	5	7	8
P23470-2;P23470	P23470-2;P23470	2;2	2;2	2;2	Receptor-type tyrosine-protein phosphatase gamma	PTPRG	sp|P23470-2|PTPRG_HUMAN Isoform 2 of Receptor-type tyrosine-protein phosphatase gamma OS=Homo sapiens OX=9606 GN=PTPRG;sp|P23470|PTPRG_HUMAN Receptor-type tyrosine-protein phosphatase gamma OS=Homo sapiens OX=9606 GN=PTPRG PE=1 SV=4	2	2	2	2	0	0	1	1	1	1	1	1	0	0	0	0	1	1	1	1	1	1	0	1	1	1	1	0	0	0	1	1	0	0	1	1	0	0	1	0	0	1
P23471-3;P23471-2;P23471	P23471-3;P23471-2;P23471	1;1;1	1;1;1	1;1;1	Receptor-type tyrosine-protein phosphatase zeta	PTPRZ1	sp|P23471-3|PTPRZ_HUMAN Isoform 3 of Receptor-type tyrosine-protein phosphatase zeta OS=Homo sapiens OX=9606 GN=PTPRZ1;sp|P23471-2|PTPRZ_HUMAN Isoform 2 of Receptor-type tyrosine-protein phosphatase zeta OS=Homo sapiens OX=9606 GN=PTPRZ1;sp|P23471|PTPRZ_HU	3	1	1	1	1	0	0	1	1	1	1	1	1	0	1	1	1	0	1	1	1	1	1	1	1	1	1	1	1	1	1	1	0	0	1	1	1	0	0	1	1	0
P23508;P23508-2	P23508;P23508-2	2;2	2;2	2;2	Colorectal mutant cancer protein	MCC	sp|P23508|CRCM_HUMAN Colorectal mutant cancer protein OS=Homo sapiens OX=9606 GN=MCC PE=1 SV=2;sp|P23508-2|CRCM_HUMAN Isoform 2 of Colorectal mutant cancer protein OS=Homo sapiens OX=9606 GN=MCC	2	2	2	2	0	0	0	0	0	0	0	0	0	0	0	0	1	0	0	0	0	0	0	0	0	0	0	0	0	0	0	0	0	1	0	0	0	0	0	1	0	0
P23511-2;P23511	P23511-2;P23511	2;2	2;2	2;2	Nuclear transcription factor Y subunit alpha	NFYA	sp|P23511-2|NFYA_HUMAN Isoform Short of Nuclear transcription factor Y subunit alpha OS=Homo sapiens OX=9606 GN=NFYA;sp|P23511|NFYA_HUMAN Nuclear transcription factor Y subunit alpha OS=Homo sapiens OX=9606 GN=NFYA PE=1 SV=2	2	2	2	2	2	2	1	0	2	1	1	1	1	1	1	2	2	2	1	0	2	2	2	0	2	2	1	1	2	2	2	2	2	0	1	2	2	2	1	0	1	1
P23634-7;P23634-6;P23634-8;P23634;P23634-5;P23634-4;P23634-3;P23634-2	P23634-7;P23634-6;P23634-8;P23634;P23634-5;P23634-4;P23634-3;P23634-2	14;14;14;14;13;13;13;13	5;5;5;5;4;4;4;4	5;5;5;5;4;4;4;4	Plasma membrane calcium-transporting ATPase 4	ATP2B4	sp|P23634-7|AT2B4_HUMAN Isoform ZB of Plasma membrane calcium-transporting ATPase 4 OS=Homo sapiens OX=9606 GN=ATP2B4;sp|P23634-6|AT2B4_HUMAN Isoform XB of Plasma membrane calcium-transporting ATPase 4 OS=Homo sapiens OX=9606 GN=ATP2B4;sp|P23634-8|AT2B4_HU	8	14	5	5	8	6	7	8	7	8	5	7	5	8	8	7	9	8	7	9	7	7	7	8	7	7	5	7	7	7	7	9	7	7	7	9	8	6	8	6	7	7
P23687;P48147	P23687;P48147	26;14	26;14	26;14	Prolyl endopeptidase	PREP	sp|P23687|PPCE_PIG Prolyl endopeptidase OS=Sus scrofa OX=9823 GN=PREP PE=1 SV=1;sp|P48147|PPCE_HUMAN Prolyl endopeptidase OS=Homo sapiens OX=9606 GN=PREP PE=1 SV=2	2	26	26	26	13	16	12	12	15	13	11	14	15	11	14	10	13	11	10	12	15	10	8	11	14	14	12	9	14	12	10	13	13	10	12	13	12	14	12	13	12	14
P23763-2;P23763-3;P23763	P23763-2;P23763-3;P23763	1;1;1	1;1;1	1;1;1	Vesicle-associated membrane protein 1	VAMP1	sp|P23763-2|VAMP1_HUMAN Isoform 3 of Vesicle-associated membrane protein 1 OS=Homo sapiens OX=9606 GN=VAMP1;sp|P23763-3|VAMP1_HUMAN Isoform 2 of Vesicle-associated membrane protein 1 OS=Homo sapiens OX=9606 GN=VAMP1;sp|P23763|VAMP1_HUMAN Vesicle-associated	3	1	1	1	1	1	0	0	1	0	0	0	0	0	0	0	1	0	0	0	1	0	0	0	1	1	0	0	1	0	0	0	1	0	0	0	1	0	0	0	1	0
P23786	P23786	1	1	1	Carnitine O-palmitoyltransferase 2, mitochondrial	CPT2	sp|P23786|CPT2_HUMAN Carnitine O-palmitoyltransferase 2, mitochondrial OS=Homo sapiens OX=9606 GN=CPT2 PE=1 SV=2	1	1	1	1	0	1	0	0	0	1	0	0	0	1	0	1	0	1	1	1	1	1	1	1	0	0	0	0	0	0	0	0	1	0	0	0	0	1	0	0	0	1
P23921;Q76RD8;P20503;P0DSV2;P0DSV1	P23921	3;1;1;1;1	3;1;1;1;1	3;1;1;1;1	Ribonucleoside-diphosphate reductase large subunit	RRM1	sp|P23921|RIR1_HUMAN Ribonucleoside-diphosphate reductase large subunit OS=Homo sapiens OX=9606 GN=RRM1 PE=1 SV=1	5	3	3	3	1	1	0	0	3	1	0	0	1	0	0	0	3	0	0	0	2	1	0	0	1	0	0	0	1	1	1	1	1	0	1	0	1	1	0	1	0	1
P23942	P23942	2	2	2	Peripherin-2	PRPH2	sp|P23942|PRPH2_HUMAN Peripherin-2 OS=Homo sapiens OX=9606 GN=PRPH2 PE=1 SV=1	1	2	2	2	1	2	2	2	1	2	2	1	1	2	2	2	2	2	2	2	1	2	1	2	2	1	1	2	2	2	1	2	2	2	2	2	1	2	1	2	2	2
Q9QJ27;P24436	Q9QJ27;P24436	1;1	1;1	1;1			sp|Q9QJ27|TRX2_HHV6Z Triplex capsid protein 2 OS=Human herpesvirus 6B (strain Z29) OX=36351 GN=TRX2 PE=1 SV=1;sp|P24436|TRX2_HHV6U Triplex capsid protein 2 OS=Human herpesvirus 6A (strain Uganda-1102) OX=10370 GN=TRX2 PE=3 SV=1	2	1	1	1	1	1	0	1	1	1	0	0	0	1	1	1	1	1	0	0	1	1	0	0	1	1	1	1	1	1	0	1	1	0	1	1	1	1	1	0	1	1
P24534;P29412	P24534	6;2	6;2	6;2	Elongation factor 1-beta	EEF1B2	sp|P24534|EF1B_HUMAN Elongation factor 1-beta OS=Homo sapiens OX=9606 GN=EEF1B2 PE=1 SV=3	2	6	6	6	4	2	2	2	1	2	2	2	3	2	2	2	2	2	2	2	3	2	2	2	1	2	2	2	3	2	2	3	4	2	2	2	3	3	2	2	3	1
P24539	P24539	3	3	3	ATP synthase F(0) complex subunit B1, mitochondrial	ATP5F1	sp|P24539|AT5F1_HUMAN ATP synthase F(0) complex subunit B1, mitochondrial OS=Homo sapiens OX=9606 GN=ATP5PB PE=1 SV=2	1	3	3	3	3	3	2	2	3	2	1	1	3	2	3	2	2	3	2	1	3	3	1	2	3	3	2	3	3	2	2	2	3	1	1	2	2	3	1	1	3	2
P24540	P24540	7	7	1			sp|P24540|ACYP1_PIG Acylphosphatase-1 OS=Sus scrofa OX=9823 GN=ACYP1 PE=1 SV=2	1	7	7	1	2	3	3	3	2	3	3	3	2	3	2	4	4	3	3	3	2	3	3	3	2	4	3	3	2	3	3	3	2	3	4	3	2	3	3	3	3	5
P24752;P24752-2	P24752;P24752-2	3;2	3;2	3;2	Acetyl-CoA acetyltransferase, mitochondrial	ACAT1	sp|P24752|THIL_HUMAN Acetyl-CoA acetyltransferase, mitochondrial OS=Homo sapiens OX=9606 GN=ACAT1 PE=1 SV=1;sp|P24752-2|THIL_HUMAN Isoform 2 of Acetyl-CoA acetyltransferase, mitochondrial OS=Homo sapiens OX=9606 GN=ACAT1	2	3	3	3	2	2	2	3	2	1	0	2	2	1	1	1	2	2	1	3	2	2	2	3	2	2	2	3	2	1	3	3	3	1	3	2	2	3	2	2	1	1
P24830	P24830	1	1	1			sp|P24830|VE2_HPV39 Regulatory protein E2 OS=Human papillomavirus type 39 OX=10588 GN=E2 PE=3 SV=1	1	1	1	1	0	0	0	0	0	0	0	0	0	0	0	0	0	0	0	0	0	0	0	0	0	0	0	0	0	0	0	0	0	0	0	0	0	0	0	0	0	0
P24928;P24928-2	P24928	13;6	13;6	13;6	DNA-directed RNA polymerase II subunit RPB1	POLR2A	sp|P24928|RPB1_HUMAN DNA-directed RNA polymerase II subunit RPB1 OS=Homo sapiens OX=9606 GN=POLR2A PE=1 SV=2	2	13	13	13	5	5	4	4	5	8	4	4	4	5	7	4	6	8	5	5	4	6	5	7	4	7	5	6	5	7	6	6	6	5	5	4	3	6	5	3	5	5
P24964	P24964	1	1	1			sp|P24964|CYB_PIG Cytochrome b OS=Sus scrofa OX=9823 GN=MT-CYB PE=3 SV=2	1	1	1	1	0	0	0	0	1	0	0	1	1	0	1	1	1	1	0	1	0	0	1	1	1	1	0	1	1	1	0	0	1	1	0	1	0	1	0	0	0	1
P25098;P35626	P25098;P35626	2;1	2;1	2;1	Beta-adrenergic receptor kinase 1;Beta-adrenergic receptor kinase 2	ADRBK1;ADRBK2	sp|P25098|ARBK1_HUMAN Beta-adrenergic receptor kinase 1 OS=Homo sapiens OX=9606 GN=GRK2 PE=1 SV=2;sp|P35626|ARBK2_HUMAN Beta-adrenergic receptor kinase 2 OS=Homo sapiens OX=9606 GN=GRK3 PE=1 SV=2	2	2	2	2	1	0	0	0	0	0	0	0	0	0	0	0	0	0	0	0	1	0	0	0	1	0	0	0	1	0	0	0	0	0	0	0	0	0	0	0	0	0
P25208	P25208	1	1	1	Nuclear transcription factor Y subunit beta	NFYB	sp|P25208|NFYB_HUMAN Nuclear transcription factor Y subunit beta OS=Homo sapiens OX=9606 GN=NFYB PE=1 SV=2	1	1	1	1	1	0	0	0	1	0	0	1	0	0	1	0	0	0	1	1	0	0	1	1	0	0	1	1	0	0	1	1	0	0	1	1	0	0	0	1	1	0
P46405;P25398	P46405;P25398	5;5	5;5	5;5	40S ribosomal protein S12	RPS12	sp|P46405|RS12_PIG 40S ribosomal protein S12 OS=Sus scrofa OX=9823 GN=RPS12 PE=1 SV=2;sp|P25398|RS12_HUMAN 40S ribosomal protein S12 OS=Homo sapiens OX=9606 GN=RPS12 PE=1 SV=3	2	5	5	5	3	3	3	3	3	3	3	3	4	3	4	3	3	3	4	4	3	3	3	4	3	3	3	4	3	3	3	4	3	3	3	4	4	3	3	3	3	3
P25440;P25440-2;P25440-4;P25440-3	P25440;P25440-2	3;3;1;1	3;3;1;1	3;3;1;1	Bromodomain-containing protein 2	BRD2	sp|P25440|BRD2_HUMAN Bromodomain-containing protein 2 OS=Homo sapiens OX=9606 GN=BRD2 PE=1 SV=2;sp|P25440-2|BRD2_HUMAN Isoform 2 of Bromodomain-containing protein 2 OS=Homo sapiens OX=9606 GN=BRD2	4	3	3	3	1	0	1	1	2	0	1	1	1	1	0	1	1	0	1	0	1	1	0	1	1	0	1	1	3	0	1	0	1	0	1	1	1	2	0	1	1	1
P25490;Q96MM3;O15391	P25490;Q96MM3;O15391	2;1;1	2;1;1	2;1;1	Transcriptional repressor protein YY1;Zinc finger protein 42 homolog;Transcription factor YY2	YY1;ZFP42;YY2	sp|P25490|TYY1_HUMAN Transcriptional repressor protein YY1 OS=Homo sapiens OX=9606 GN=YY1 PE=1 SV=2;sp|Q96MM3|ZFP42_HUMAN Zinc finger protein 42 homolog OS=Homo sapiens OX=9606 GN=ZFP42 PE=1 SV=2;sp|O15391|TYY2_HUMAN Transcription factor YY2 OS=Homo sapien	3	2	2	2	1	1	1	0	1	1	0	0	1	1	0	0	0	0	0	0	0	0	0	0	0	1	0	0	1	1	0	0	1	0	0	0	1	1	0	0	1	1
P25685;P25685-2	P25685;P25685-2	5;3	5;3	5;3	DnaJ homolog subfamily B member 1	DNAJB1	sp|P25685|DNJB1_HUMAN DnaJ homolog subfamily B member 1 OS=Homo sapiens OX=9606 GN=DNAJB1 PE=1 SV=4;sp|P25685-2|DNJB1_HUMAN Isoform 2 of DnaJ homolog subfamily B member 1 OS=Homo sapiens OX=9606 GN=DNAJB1	2	5	5	5	3	3	3	2	1	2	3	1	2	3	1	1	2	4	3	2	1	2	1	1	2	3	1	1	2	3	3	1	1	3	3	3	2	2	2	1	3	2
P25686-2;P25686	P25686-2;P25686	1;1	1;1	1;1	DnaJ homolog subfamily B member 2	DNAJB2	sp|P25686-2|DNJB2_HUMAN Isoform 2 of DnaJ homolog subfamily B member 2 OS=Homo sapiens OX=9606 GN=DNAJB2;sp|P25686|DNJB2_HUMAN DnaJ homolog subfamily B member 2 OS=Homo sapiens OX=9606 GN=DNAJB2 PE=1 SV=3	2	1	1	1	1	1	0	0	1	0	0	0	1	0	0	0	1	1	0	0	1	0	0	1	1	0	0	0	0	0	0	0	0	0	0	0	1	0	1	0	1	0
P25774-2;P25774	P25774-2;P25774	1;1	1;1	1;1	Cathepsin S	CTSS	sp|P25774-2|CATS_HUMAN Isoform 2 of Cathepsin S OS=Homo sapiens OX=9606 GN=CTSS;sp|P25774|CATS_HUMAN Cathepsin S OS=Homo sapiens OX=9606 GN=CTSS PE=1 SV=3	2	1	1	1	0	0	0	0	0	0	0	0	0	0	0	0	0	0	0	0	0	0	0	0	0	0	0	0	0	0	0	0	0	0	0	0	0	0	0	0	0	0
P25786;P25786-2	P25786;P25786-2	7;7	7;7	7;7	Proteasome subunit alpha type-1	PSMA1	sp|P25786|PSA1_HUMAN Proteasome subunit alpha type-1 OS=Homo sapiens OX=9606 GN=PSMA1 PE=1 SV=1;sp|P25786-2|PSA1_HUMAN Isoform Long of Proteasome subunit alpha type-1 OS=Homo sapiens OX=9606 GN=PSMA1	2	7	7	7	1	4	3	3	2	4	3	3	3	4	4	3	3	4	3	3	4	4	3	3	3	4	4	3	4	4	3	4	4	4	3	3	3	4	3	4	2	4
P25787	P25787	5	5	5	Proteasome subunit alpha type-2	PSMA2	sp|P25787|PSA2_HUMAN Proteasome subunit alpha type-2 OS=Homo sapiens OX=9606 GN=PSMA2 PE=1 SV=2	1	5	5	5	5	5	4	4	5	4	4	4	5	4	4	4	5	5	3	5	5	5	4	3	5	5	2	5	5	5	3	4	5	5	5	4	4	5	4	5	4	5
P25788-2;P25788	P25788-2;P25788	4;4	4;4	4;4	Proteasome subunit alpha type-3	PSMA3	sp|P25788-2|PSA3_HUMAN Isoform 2 of Proteasome subunit alpha type-3 OS=Homo sapiens OX=9606 GN=PSMA3;sp|P25788|PSA3_HUMAN Proteasome subunit alpha type-3 OS=Homo sapiens OX=9606 GN=PSMA3 PE=1 SV=2	2	4	4	4	1	2	2	2	3	3	1	1	2	1	3	4	3	3	1	2	4	2	1	3	2	2	2	2	3	2	1	2	3	2	2	2	2	2	2	1	1	2
P25789;P25789-2	P25789;P25789-2	6;4	6;4	6;4	Proteasome subunit alpha type-4	PSMA4	sp|P25789|PSA4_HUMAN Proteasome subunit alpha type-4 OS=Homo sapiens OX=9606 GN=PSMA4 PE=1 SV=1;sp|P25789-2|PSA4_HUMAN Isoform 2 of Proteasome subunit alpha type-4 OS=Homo sapiens OX=9606 GN=PSMA4	2	6	6	6	5	2	2	3	2	2	2	4	3	3	3	3	3	3	2	2	3	3	2	4	3	3	4	3	5	3	4	5	2	3	4	6	3	2	3	3	3	3
P26038;P26042	P26038;P26042	14;13	14;13	7;6	Moesin	MSN	sp|P26038|MOES_HUMAN Moesin OS=Homo sapiens OX=9606 GN=MSN PE=1 SV=3;sp|P26042|MOES_PIG Moesin OS=Sus scrofa OX=9823 GN=MSN PE=2 SV=3	2	14	14	7	5	3	7	5	4	5	4	3	7	6	4	5	5	7	3	4	5	7	5	4	6	7	4	6	5	5	6	5	7	5	7	5	7	5	6	5	5	5
P26044;P35241;P35241-5;P35241-4;P35241-3;P35241-2	P26044;P35241;P35241-5;P35241-4	12;12;12;8;4;2	5;5;5;3;2;2	5;5;5;3;2;2	Radixin	RDX	sp|P26044|RADI_PIG Radixin OS=Sus scrofa OX=9823 GN=RDX PE=2 SV=1;sp|P35241|RADI_HUMAN Radixin OS=Homo sapiens OX=9606 GN=RDX PE=1 SV=1;sp|P35241-5|RADI_HUMAN Isoform 5 of Radixin OS=Homo sapiens OX=9606 GN=RDX;sp|P35241-4|RADI_HUMAN Isoform 4 of Radixin O	6	12	5	5	5	5	6	6	4	6	6	5	5	6	5	5	5	4	4	5	4	4	3	5	6	6	4	8	5	7	6	4	6	4	6	5	7	4	6	5	5	6
P26196	P26196	12	12	12	Probable ATP-dependent RNA helicase DDX6	DDX6	sp|P26196|DDX6_HUMAN Probable ATP-dependent RNA helicase DDX6 OS=Homo sapiens OX=9606 GN=DDX6 PE=1 SV=2	1	12	12	12	3	7	8	7	6	6	8	8	7	9	7	7	4	7	8	7	6	8	5	6	7	7	8	8	6	6	9	8	7	8	9	8	4	5	6	8	3	8
P26232;P26232-2;P26232-5;P26232-3;P26232-4;P26232-6	P26232;P26232-2;P26232-5;P26232-3	21;20;20;18;10;10	16;15;15;15;6;6	16;15;15;15;6;6	Catenin alpha-2	CTNNA2	sp|P26232|CTNA2_HUMAN Catenin alpha-2 OS=Homo sapiens OX=9606 GN=CTNNA2 PE=1 SV=5;sp|P26232-2|CTNA2_HUMAN Isoform 2 of Catenin alpha-2 OS=Homo sapiens OX=9606 GN=CTNNA2;sp|P26232-5|CTNA2_HUMAN Isoform 5 of Catenin alpha-2 OS=Homo sapiens OX=9606 GN=CTNNA2;	6	21	16	16	5	6	7	7	4	7	7	7	4	6	8	8	6	10	10	9	5	6	6	7	9	10	9	6	8	9	5	9	7	5	9	10	5	6	7	5	3	6
P26358-3;P26358;P26358-2	P26358-3;P26358;P26358-2	2;2;2	2;2;2	2;2;2	DNA (cytosine-5)-methyltransferase 1	DNMT1	sp|P26358-3|DNMT1_HUMAN Isoform 3 of DNA (cytosine-5)-methyltransferase 1 OS=Homo sapiens OX=9606 GN=DNMT1;sp|P26358|DNMT1_HUMAN DNA (cytosine-5)-methyltransferase 1 OS=Homo sapiens OX=9606 GN=DNMT1 PE=1 SV=2;sp|P26358-2|DNMT1_HUMAN Isoform 2 of DNA (cytos	3	2	2	2	0	0	0	0	0	0	0	0	1	0	0	0	0	0	0	0	0	0	1	0	0	0	0	0	0	0	0	0	1	0	0	0	0	0	0	0	0	1
P26367;P26367-2	P26367;P26367-2	2;2	2;2	2;2	Paired box protein Pax-6	PAX6	sp|P26367|PAX6_HUMAN Paired box protein Pax-6 OS=Homo sapiens OX=9606 GN=PAX6 PE=1 SV=2;sp|P26367-2|PAX6_HUMAN Isoform 5a of Paired box protein Pax-6 OS=Homo sapiens OX=9606 GN=PAX6	2	2	2	2	1	0	1	1	0	0	1	1	0	1	1	1	0	0	1	2	0	1	0	0	0	0	0	2	0	0	1	1	1	0	1	1	0	0	1	0	0	0
P26368-2;P26368	P26368-2;P26368	9;9	9;9	9;9	Splicing factor U2AF 65 kDa subunit	U2AF2	sp|P26368-2|U2AF2_HUMAN Isoform 2 of Splicing factor U2AF 65 kDa subunit OS=Homo sapiens OX=9606 GN=U2AF2;sp|P26368|U2AF2_HUMAN Splicing factor U2AF 65 kDa subunit OS=Homo sapiens OX=9606 GN=U2AF2 PE=1 SV=4	2	9	9	9	6	7	7	9	7	6	8	8	7	6	7	5	8	6	8	6	8	7	8	7	7	8	7	8	8	8	7	6	8	7	9	8	7	7	8	6	8	9
P26373-2;P26373	P26373-2;P26373	2;2	2;2	2;2	60S ribosomal protein L13	RPL13	sp|P26373-2|RL13_HUMAN Isoform 2 of 60S ribosomal protein L13 OS=Homo sapiens OX=9606 GN=RPL13;sp|P26373|RL13_HUMAN 60S ribosomal protein L13 OS=Homo sapiens OX=9606 GN=RPL13 PE=1 SV=4	2	2	2	2	0	0	0	1	0	0	0	1	0	1	0	1	0	0	1	2	0	0	0	1	0	0	0	1	0	0	1	0	1	1	1	1	0	0	0	0	0	0
P26378-3;P26378-4;P26378-2;P26378-5;P26378-1;P26378	P26378-3;P26378-4;P26378-2;P26378-5;P26378-1;P26378	8;7;7;7;7;7	8;7;7;7;7;7	3;2;2;2;2;2	ELAV-like protein 4	ELAVL4	sp|P26378-3|ELAV4_HUMAN Isoform 3 of ELAV-like protein 4 OS=Homo sapiens OX=9606 GN=ELAVL4;sp|P26378-4|ELAV4_HUMAN Isoform 4 of ELAV-like protein 4 OS=Homo sapiens OX=9606 GN=ELAVL4;sp|P26378-2|ELAV4_HUMAN Isoform 2 of ELAV-like protein 4 OS=Homo sapiens O	6	8	8	3	3	2	2	3	4	2	3	2	3	2	2	1	2	2	3	4	3	3	2	2	3	3	3	3	3	2	2	4	4	2	3	5	3	2	3	2	2	4
P26440-2;P26440	P26440-2;P26440	3;3	3;3	3;3	Isovaleryl-CoA dehydrogenase, mitochondrial	IVD	sp|P26440-2|IVD_HUMAN Isoform 2 of Isovaleryl-CoA dehydrogenase, mitochondrial OS=Homo sapiens OX=9606 GN=IVD;sp|P26440|IVD_HUMAN Isovaleryl-CoA dehydrogenase, mitochondrial OS=Homo sapiens OX=9606 GN=IVD PE=1 SV=2	2	3	3	3	0	0	1	1	0	0	0	0	0	1	0	1	0	0	0	1	0	0	0	2	0	0	0	0	0	0	1	2	0	0	0	0	0	0	1	0	0	0
P26639;P26639-2	P26639;P26639-2	7;7	7;7	6;6	Threonine--tRNA ligase, cytoplasmic	TARS	sp|P26639|SYTC_HUMAN Threonine--tRNA ligase 1, cytoplasmic OS=Homo sapiens OX=9606 GN=TARS1 PE=1 SV=3;sp|P26639-2|SYTC_HUMAN Isoform 2 of Threonine--tRNA ligase 1, cytoplasmic OS=Homo sapiens OX=9606 GN=TARS1	2	7	7	6	3	3	5	6	5	3	3	3	5	4	5	4	4	4	4	3	5	5	4	4	4	3	4	5	5	6	4	6	5	6	5	6	3	5	5	3	5	3
P26640;P26640-2	P26640	11;3	11;3	11;3	Valine--tRNA ligase	VARS	sp|P26640|SYVC_HUMAN Valine--tRNA ligase OS=Homo sapiens OX=9606 GN=VARS1 PE=1 SV=4	2	11	11	11	7	6	3	2	7	3	3	5	5	2	7	4	6	3	3	3	7	4	3	6	4	5	2	4	5	3	5	4	6	4	5	6	7	5	3	1	4	6
P26641;P26641-2	P26641;P26641-2	11;10	1;0	1;0	Elongation factor 1-gamma	EEF1G	sp|P26641|EF1G_HUMAN Elongation factor 1-gamma OS=Homo sapiens OX=9606 GN=EEF1G PE=1 SV=3;sp|P26641-2|EF1G_HUMAN Isoform 2 of Elongation factor 1-gamma OS=Homo sapiens OX=9606 GN=EEF1G	2	11	1	1	5	4	8	5	5	5	7	7	2	5	5	6	6	6	8	5	4	6	8	8	5	6	6	7	7	7	7	6	6	7	9	8	2	6	6	5	3	4
P26885	P26885	3	3	3	Peptidyl-prolyl cis-trans isomerase FKBP2	FKBP2	sp|P26885|FKBP2_HUMAN Peptidyl-prolyl cis-trans isomerase FKBP2 OS=Homo sapiens OX=9606 GN=FKBP2 PE=1 SV=2	1	3	3	3	2	2	1	1	1	2	1	2	2	2	2	2	1	2	2	3	2	2	3	2	2	2	0	2	2	2	2	2	2	2	2	3	2	2	2	2	2	2
P26998	P26998	2	2	2	Beta-crystallin B3;Beta-crystallin B3, N-terminally processed	CRYBB3	sp|P26998|CRBB3_HUMAN Beta-crystallin B3 OS=Homo sapiens OX=9606 GN=CRYBB3 PE=1 SV=4	1	2	2	2	0	0	0	0	1	1	1	1	1	1	1	1	0	0	0	1	0	0	1	0	1	1	1	1	0	1	1	1	2	1	1	1	0	1	1	1	1	1
P27105;P27105-2	P27105;P27105-2	3;2	3;2	3;2	Erythrocyte band 7 integral membrane protein	STOM	sp|P27105|STOM_HUMAN Stomatin OS=Homo sapiens OX=9606 GN=STOM PE=1 SV=3;sp|P27105-2|STOM_HUMAN Isoform 2 of Stomatin OS=Homo sapiens OX=9606 GN=STOM	2	3	3	3	0	1	1	1	1	1	1	0	1	2	1	1	0	2	1	0	2	2	2	1	0	1	1	2	1	1	1	2	1	0	1	0	1	1	1	1	0	1
P27144	P27144	2	2	2	Adenylate kinase 4, mitochondrial	AK4	sp|P27144|KAD4_HUMAN Adenylate kinase 4, mitochondrial OS=Homo sapiens OX=9606 GN=AK4 PE=1 SV=1	1	2	2	2	2	1	1	2	2	0	1	1	0	1	1	1	2	1	1	1	2	0	1	1	1	0	2	1	2	1	2	2	1	2	1	2	2	1	1	1	2	2
P27348;P31947-2;P31947	P27348	15;3;3	12;0;0	12;0;0	14-3-3 protein theta	YWHAQ	sp|P27348|1433T_HUMAN 14-3-3 protein theta OS=Homo sapiens OX=9606 GN=YWHAQ PE=1 SV=1	3	15	12	12	9	8	9	10	8	9	8	9	8	9	8	8	9	8	8	10	7	9	8	10	8	9	9	11	10	9	8	10	7	8	10	9	10	9	9	9	10	9
P27361-2;P27361-3;P27361	P27361-2;P27361-3;P27361	4;4;4	3;3;3	3;3;3	Mitogen-activated protein kinase 3	MAPK3	sp|P27361-2|MK03_HUMAN Isoform 2 of Mitogen-activated protein kinase 3 OS=Homo sapiens OX=9606 GN=MAPK3;sp|P27361-3|MK03_HUMAN Isoform 3 of Mitogen-activated protein kinase 3 OS=Homo sapiens OX=9606 GN=MAPK3;sp|P27361|MK03_HUMAN Mitogen-activated protein k	3	4	3	3	2	2	2	2	2	2	2	2	1	2	2	3	3	2	1	3	1	1	2	2	2	3	2	2	3	2	2	3	3	2	3	3	3	3	2	2	2	1
P27448-3;P27448-7;P27448;P27448-2;P27448-6;P27448-4;Q7KZI7-9;Q7KZI7;Q7KZI7-6;Q7KZI7-3;Q7KZI7-14;P27448-8;Q7KZI7-12;Q7KZI7-8;Q7KZI7-4;Q7KZI7-16;Q7KZI7-5;Q7KZI7-15;Q7KZI7-2;Q7KZI7-7;Q7KZI7-13;Q7KZI7-10;Q7KZI7-11;Q9P0L2-2;Q9P0L2-3;Q9P0L2	P27448-3;P27448-7;P27448;P27448-2;P27448-6;P27448-4;Q7KZI7-9;Q7KZI7;Q7KZI7-6;Q7KZI7-3;Q7KZI7-14;P27448-8;Q7KZI7-12;Q7KZI7-8;Q7KZI7-4;Q7KZI7-16;Q7KZI7-5;Q7KZI7-15;Q7KZI7-2;Q7KZI7-7;Q7KZI7-13;Q7KZI7-10;Q7KZI7-11	5;5;5;5;5;5;3;3;3;3;3;3;3;3;3;3;3;3;3;3;3;3;3;2;2;2	5;5;5;5;5;5;3;3;3;3;3;3;3;3;3;3;3;3;3;3;3;3;3;2;2;2	4;4;4;4;4;4;2;2;2;2;2;3;2;2;2;2;2;2;2;2;2;2;2;1;1;1	MAP/microtubule affinity-regulating kinase 3;Serine/threonine-protein kinase MARK2	MARK3;MARK2	sp|P27448-3|MARK3_HUMAN Isoform 3 of MAP/microtubule affinity-regulating kinase 3 OS=Homo sapiens OX=9606 GN=MARK3;sp|P27448-7|MARK3_HUMAN Isoform 6 of MAP/microtubule affinity-regulating kinase 3 OS=Homo sapiens OX=9606 GN=MARK3;sp|P27448|MARK3_HUMAN MAP/	26	5	5	4	3	2	1	1	2	1	1	2	3	1	2	1	2	0	0	1	2	3	1	1	3	1	1	2	2	1	1	2	3	1	2	2	3	2	1	2	3	1
P27594;P20591-2;P20591;P20592-2;P20592	P27594	19;7;7;3;3	19;7;7;3;3	18;6;6;2;2			sp|P27594|MX1_PIG Interferon-induced GTP-binding protein Mx1 OS=Sus scrofa OX=9823 GN=MX1 PE=2 SV=1	5	19	19	18	3	2	2	4	4	3	4	4	5	3	5	6	4	4	5	5	7	5	4	5	4	3	4	4	2	3	4	3	3	3	2	5	9	6	7	5	9	9
P27694	P27694	4	4	4	Replication protein A 70 kDa DNA-binding subunit;Replication protein A 70 kDa DNA-binding subunit, N-terminally processed	RPA1	sp|P27694|RFA1_HUMAN Replication protein A 70 kDa DNA-binding subunit OS=Homo sapiens OX=9606 GN=RPA1 PE=1 SV=2	1	4	4	4	1	0	1	1	1	1	1	1	1	1	2	1	1	1	2	1	1	1	1	2	1	1	1	2	1	1	1	1	1	1	2	1	1	1	1	0	1	1
P27695	P27695	9	9	9	DNA-(apurinic or apyrimidinic site) lyase;DNA-(apurinic or apyrimidinic site) lyase, mitochondrial	APEX1	sp|P27695|APEX1_HUMAN DNA-(apurinic or apyrimidinic site) endonuclease OS=Homo sapiens OX=9606 GN=APEX1 PE=1 SV=2	1	9	9	9	5	8	4	3	5	4	4	6	7	6	6	6	6	6	4	6	6	4	5	5	5	5	4	6	5	4	5	5	6	4	6	6	4	6	6	4	5	6
P27708	P27708	17	17	17	CAD protein;Glutamine-dependent carbamoyl-phosphate synthase;Aspartate carbamoyltransferase;Dihydroorotase	CAD	sp|P27708|PYR1_HUMAN CAD protein OS=Homo sapiens OX=9606 GN=CAD PE=1 SV=3	1	17	17	17	7	5	6	6	3	5	4	5	6	6	4	7	4	6	5	7	4	6	5	6	5	8	6	7	6	6	6	7	6	10	6	8	4	5	5	6	6	5
P27816-2;P27816;P27816-5;P27816-6;P27816-4;P27816-7	P27816-2;P27816;P27816-5;P27816-6;P27816-4	5;5;4;4;3;2	5;5;4;4;3;2	5;5;4;4;3;2	Microtubule-associated protein 4	MAP4	sp|P27816-2|MAP4_HUMAN Isoform 2 of Microtubule-associated protein 4 OS=Homo sapiens OX=9606 GN=MAP4;sp|P27816|MAP4_HUMAN Microtubule-associated protein 4 OS=Homo sapiens OX=9606 GN=MAP4 PE=1 SV=3;sp|P27816-5|MAP4_HUMAN Isoform 5 of Microtubule-associated	6	5	5	5	1	1	2	0	4	2	2	2	1	2	2	3	2	2	1	3	4	1	3	2	2	1	2	2	3	1	2	2	3	2	3	2	3	2	2	2	2	1
P27824-2;P27824;P27824-3	P27824-2;P27824;P27824-3	5;5;3	5;5;3	5;5;3	Calnexin	CANX	sp|P27824-2|CALX_HUMAN Isoform 2 of Calnexin OS=Homo sapiens OX=9606 GN=CANX;sp|P27824|CALX_HUMAN Calnexin OS=Homo sapiens OX=9606 GN=CANX PE=1 SV=2;sp|P27824-3|CALX_HUMAN Isoform 3 of Calnexin OS=Homo sapiens OX=9606 GN=CANX	3	5	5	5	3	3	3	3	3	3	3	3	3	3	3	3	3	3	3	3	3	3	3	3	3	3	3	3	4	3	3	3	4	4	3	3	4	4	3	4	4	4
P27917	P27917	2	2	2			sp|P27917|APOC3_PIG Apolipoprotein C-III OS=Sus scrofa OX=9823 GN=APOC3 PE=1 SV=2	1	2	2	2	1	0	2	1	2	1	2	2	1	1	1	2	1	1	1	1	1	1	1	1	0	0	1	1	1	1	1	1	1	1	1	2	1	1	2	2	1	1
P28066;P28066-2	P28066;P28066-2	6;5	6;5	6;5	Proteasome subunit alpha type-5	PSMA5	sp|P28066|PSA5_HUMAN Proteasome subunit alpha type-5 OS=Homo sapiens OX=9606 GN=PSMA5 PE=1 SV=3;sp|P28066-2|PSA5_HUMAN Isoform 2 of Proteasome subunit alpha type-5 OS=Homo sapiens OX=9606 GN=PSMA5	2	6	6	6	4	4	3	3	4	4	4	3	5	3	3	2	4	4	3	3	4	4	4	3	4	3	4	3	5	5	5	2	5	4	4	4	6	5	3	3	5	3
P28072	P28072	3	3	3	Proteasome subunit beta type-6	PSMB6	sp|P28072|PSB6_HUMAN Proteasome subunit beta type-6 OS=Homo sapiens OX=9606 GN=PSMB6 PE=1 SV=4	1	3	3	3	0	1	2	1	0	0	1	0	1	1	0	0	0	1	0	0	2	0	0	2	2	0	0	0	1	0	1	1	0	1	1	1	0	1	0	0	0	0
P28074;P28074-3;P28074-2	P28074;P28074-3;P28074-2	6;5;3	6;5;3	6;5;3	Proteasome subunit beta type-5	PSMB5	sp|P28074|PSB5_HUMAN Proteasome subunit beta type-5 OS=Homo sapiens OX=9606 GN=PSMB5 PE=1 SV=3;sp|P28074-3|PSB5_HUMAN Isoform 3 of Proteasome subunit beta type-5 OS=Homo sapiens OX=9606 GN=PSMB5;sp|P28074-2|PSB5_HUMAN Isoform 2 of Proteasome subunit beta t	3	6	6	6	1	2	1	4	3	1	1	4	2	2	2	4	2	1	1	3	3	1	2	3	1	1	1	3	3	2	2	3	2	2	2	4	2	2	0	0	2	1
P28288;P28288-2;P28288-3	P28288;P28288-2	4;4;1	4;4;1	4;4;1	ATP-binding cassette sub-family D member 3	ABCD3	sp|P28288|ABCD3_HUMAN ATP-binding cassette sub-family D member 3 OS=Homo sapiens OX=9606 GN=ABCD3 PE=1 SV=1;sp|P28288-2|ABCD3_HUMAN Isoform 2 of ATP-binding cassette sub-family D member 3 OS=Homo sapiens OX=9606 GN=ABCD3	3	4	4	4	1	1	1	0	1	1	1	1	0	1	1	1	1	1	1	1	1	1	1	0	2	1	1	1	0	1	1	2	0	1	1	2	1	0	1	1	1	0
P28331;P28331-2;P28331-4;P28331-5;P28331-3	P28331;P28331-2;P28331-4;P28331-5;P28331-3	21;21;20;17;16	21;21;20;17;16	21;21;20;17;16	NADH-ubiquinone oxidoreductase 75 kDa subunit, mitochondrial	NDUFS1	sp|P28331|NDUS1_HUMAN NADH-ubiquinone oxidoreductase 75 kDa subunit, mitochondrial OS=Homo sapiens OX=9606 GN=NDUFS1 PE=1 SV=3;sp|P28331-2|NDUS1_HUMAN Isoform 2 of NADH-ubiquinone oxidoreductase 75 kDa subunit, mitochondrial OS=Homo sapiens OX=9606 GN=NDUF	5	21	21	21	7	6	7	6	7	8	6	9	6	5	7	6	6	5	7	6	7	5	7	13	7	7	7	7	7	5	7	9	9	7	9	11	7	7	6	9	7	7
P28472-4;P28472-3;P28472-2;P28472	P28472-4;P28472-3;P28472-2;P28472	4;4;4;4	2;2;2;2	2;2;2;2	Gamma-aminobutyric acid receptor subunit beta-3	GABRB3	sp|P28472-4|GBRB3_HUMAN Isoform 4 of Gamma-aminobutyric acid receptor subunit beta-3 OS=Homo sapiens OX=9606 GN=GABRB3;sp|P28472-3|GBRB3_HUMAN Isoform 3 of Gamma-aminobutyric acid receptor subunit beta-3 OS=Homo sapiens OX=9606 GN=GABRB3;sp|P28472-2|GBRB3_	4	4	2	2	1	2	2	2	3	2	3	2	2	2	2	2	3	2	1	3	2	2	4	3	3	2	2	2	3	1	2	3	4	3	3	3	2	2	2	1	2	2
P28482;P28482-2	P28482;P28482-2	11;10	11;10	10;9	Mitogen-activated protein kinase 1	MAPK1	sp|P28482|MK01_HUMAN Mitogen-activated protein kinase 1 OS=Homo sapiens OX=9606 GN=MAPK1 PE=1 SV=3;sp|P28482-2|MK01_HUMAN Isoform 2 of Mitogen-activated protein kinase 1 OS=Homo sapiens OX=9606 GN=MAPK1	2	11	11	10	6	8	8	7	7	6	7	6	5	7	6	6	7	8	8	7	6	5	6	7	7	7	6	6	7	7	7	7	7	7	7	8	5	7	5	6	4	7
P28491;P27797	P28491;P27797	14;10	14;10	14;10	Calreticulin	CALR	sp|P28491|CALR_PIG Calreticulin OS=Sus scrofa OX=9823 GN=CALR PE=1 SV=3;sp|P27797|CALR_HUMAN Calreticulin OS=Homo sapiens OX=9606 GN=CALR PE=1 SV=1	2	14	14	14	13	11	12	11	10	11	10	10	11	9	9	11	11	10	11	11	12	11	9	11	10	9	9	12	11	9	10	11	11	11	11	12	13	12	11	11	12	11
P28676	P28676	1	1	1	Grancalcin	GCA	sp|P28676|GRAN_HUMAN Grancalcin OS=Homo sapiens OX=9606 GN=GCA PE=1 SV=2	1	1	1	1	0	0	0	0	1	0	0	1	0	1	0	0	1	0	1	0	1	1	1	1	1	0	0	1	0	0	0	1	1	0	0	1	1	1	0	0	0	1
P28702;P28702-3	P28702;P28702-3	1;1	1;1	1;1	Retinoic acid receptor RXR-beta	RXRB	sp|P28702|RXRB_HUMAN Retinoic acid receptor RXR-beta OS=Homo sapiens OX=9606 GN=RXRB PE=1 SV=2;sp|P28702-3|RXRB_HUMAN Isoform 2 of Retinoic acid receptor RXR-beta OS=Homo sapiens OX=9606 GN=RXRB	2	1	1	1	0	1	1	1	0	1	1	0	0	1	0	0	0	0	0	0	0	1	0	1	0	1	0	0	0	0	1	1	0	0	0	0	0	1	0	0	0	0
P28768	P28768	3	3	2			sp|P28768|SODM_PIG Superoxide dismutase [Mn], mitochondrial (Fragment) OS=Sus scrofa OX=9823 GN=SOD2 PE=2 SV=1	1	3	3	2	1	1	2	1	1	1	2	1	2	2	1	1	1	1	2	1	1	1	1	1	1	0	2	1	1	2	2	2	1	1	2	1	1	1	2	1	1	1
P28839;P28838-2;P28838	P28839	15;6;6	15;6;6	15;6;6			sp|P28839|AMPL_PIG Cytosol aminopeptidase OS=Sus scrofa OX=9823 GN=LAP3 PE=1 SV=2	3	15	15	15	8	9	9	8	9	9	9	8	9	7	6	9	8	11	7	8	9	7	9	9	11	8	10	8	10	10	9	8	10	7	8	11	8	11	8	10	9	7
P28845	P28845	1	1	1	Corticosteroid 11-beta-dehydrogenase isozyme 1	HSD11B1	sp|P28845|DHI1_HUMAN Corticosteroid 11-beta-dehydrogenase isozyme 1 OS=Homo sapiens OX=9606 GN=HSD11B1 PE=1 SV=3	1	1	1	1	1	1	1	1	1	1	1	0	1	1	1	0	1	1	1	0	1	1	1	0	1	1	1	1	1	1	1	1	1	1	1	1	1	1	1	0	1	1
P29083	P29083	1	1	1	General transcription factor IIE subunit 1	GTF2E1	sp|P29083|T2EA_HUMAN General transcription factor IIE subunit 1 OS=Homo sapiens OX=9606 GN=GTF2E1 PE=1 SV=2	1	1	1	1	0	1	1	0	0	1	0	0	1	0	1	0	0	1	1	1	1	1	0	0	0	1	0	0	0	1	1	1	1	1	1	1	0	1	0	0	0	1
P29144	P29144	8	8	8	Tripeptidyl-peptidase 2	TPP2	sp|P29144|TPP2_HUMAN Tripeptidyl-peptidase 2 OS=Homo sapiens OX=9606 GN=TPP2 PE=1 SV=4	1	8	8	8	1	1	2	1	1	1	1	2	1	0	1	0	0	1	0	2	1	2	0	0	1	1	1	3	1	1	1	1	1	1	1	0	3	1	0	1	2	1
P29323-2;P29323-3;P29323;P54762-5	P29323-2;P29323-3;P29323	12;12;12;1	12;12;12;1	11;11;11;0	Ephrin type-B receptor 2	EPHB2	sp|P29323-2|EPHB2_HUMAN Isoform 2 of Ephrin type-B receptor 2 OS=Homo sapiens OX=9606 GN=EPHB2;sp|P29323-3|EPHB2_HUMAN Isoform 3 of Ephrin type-B receptor 2 OS=Homo sapiens OX=9606 GN=EPHB2;sp|P29323|EPHB2_HUMAN Ephrin type-B receptor 2 OS=Homo sapiens OX=	4	12	12	11	2	4	5	4	5	5	3	5	7	4	4	4	6	7	4	5	7	6	3	5	7	5	3	5	4	4	3	4	5	4	4	8	3	3	5	5	0	6
P29350;P29350-3;P29350-4;P29350-2	P29350;P29350-3;P29350-4;P29350-2	3;3;3;2	3;3;3;2	3;3;3;2	Tyrosine-protein phosphatase non-receptor type 6	PTPN6	sp|P29350|PTN6_HUMAN Tyrosine-protein phosphatase non-receptor type 6 OS=Homo sapiens OX=9606 GN=PTPN6 PE=1 SV=1;sp|P29350-3|PTN6_HUMAN Isoform 2 of Tyrosine-protein phosphatase non-receptor type 6 OS=Homo sapiens OX=9606 GN=PTPN6;sp|P29350-4|PTN6_HUMAN Is	4	3	3	3	0	0	0	0	0	0	0	0	0	0	0	0	0	0	0	0	0	0	0	0	0	0	0	0	0	0	0	0	0	0	0	0	0	0	0	0	0	0
P29401;P29401-2	P29401;P29401-2	11;11	11;11	11;11	Transketolase	TKT	sp|P29401|TKT_HUMAN Transketolase OS=Homo sapiens OX=9606 GN=TKT PE=1 SV=3;sp|P29401-2|TKT_HUMAN Isoform 2 of Transketolase OS=Homo sapiens OX=9606 GN=TKT	2	11	11	11	3	4	4	4	3	3	4	5	3	5	4	4	3	3	4	6	3	3	3	5	3	3	3	5	4	4	4	6	3	4	5	5	4	3	6	4	4	4
P29508-2;P29508;P48594	P29508-2;P29508;P48594	2;2;1	2;2;1	2;2;1	Serpin B3;Serpin B4	SERPINB3;SERPINB4	sp|P29508-2|SPB3_HUMAN Isoform 2 of Serpin B3 OS=Homo sapiens OX=9606 GN=SERPINB3;sp|P29508|SPB3_HUMAN Serpin B3 OS=Homo sapiens OX=9606 GN=SERPINB3 PE=1 SV=2;sp|P48594|SPB4_HUMAN Serpin B4 OS=Homo sapiens OX=9606 GN=SERPINB4 PE=1 SV=2	3	2	2	2	1	1	1	2	0	0	0	0	0	0	0	0	0	0	0	0	0	0	0	0	0	0	0	0	0	0	0	0	0	0	0	0	0	0	0	0	1	0
P29692-2;P29692-3;P29692;P29692-4	P29692-2;P29692-3;P29692;P29692-4	4;3;3;2	4;3;3;2	4;3;3;2	Elongation factor 1-delta	EEF1D	sp|P29692-2|EF1D_HUMAN Isoform 2 of Elongation factor 1-delta OS=Homo sapiens OX=9606 GN=EEF1D;sp|P29692-3|EF1D_HUMAN Isoform 3 of Elongation factor 1-delta OS=Homo sapiens OX=9606 GN=EEF1D;sp|P29692|EF1D_HUMAN Elongation factor 1-delta OS=Homo sapiens OX=	4	4	4	4	1	1	1	2	1	1	1	1	1	1	1	2	1	1	1	2	2	1	2	3	2	2	1	2	1	1	1	3	2	1	2	2	1	1	1	3	1	1
P29700	P29700	7	7	7			sp|P29700|FETUA_PIG Alpha-2-HS-glycoprotein (Fragment) OS=Sus scrofa OX=9823 GN=AHSG PE=1 SV=1	1	7	7	7	5	5	4	4	6	5	5	4	5	4	4	4	3	4	4	4	1	5	4	5	4	4	4	4	3	4	4	5	4	5	5	5	4	6	5	5	4	5
P29762;P29373	P29762	9;1	9;1	9;1	Cellular retinoic acid-binding protein 1	CRABP1	sp|P29762|RABP1_HUMAN Cellular retinoic acid-binding protein 1 OS=Homo sapiens OX=9606 GN=CRABP1 PE=1 SV=2	2	9	9	9	3	5	5	5	4	5	4	4	4	5	3	3	3	7	5	4	2	5	5	5	6	6	5	4	4	4	7	5	6	6	7	6	4	5	5	4	4	6
[truncated: 3,101 more rows]
[truncated: 690 more columns]
