# Supplementary material for: Large-Scale Protein Analysis of Experimental Retinal Artery Occlusion
Source: Int J Mol Sci. 2023 Apr 27;24(9):7919. doi: 10.3390/ijms24097919 (PMC10177937; doi:10.3390/ijms24097919)
Supplement: Supplementary file 1 [file ijms-24-07919-s001.zip › Table S4, Significantly changed proteins day one.xlsx]

## Sheet: Ark1
P-value	Difference	Protein ID	Protein names	Gene names
0.000211221	8.2893	Q14315-2	Filamin-C	FLNC
2.17028e-05	4.75494	Q5FZP5	Secretogranin-2	SCG2
0.00516183	1.86472	Q96FN4-2	Copine-2	CPNE2
0.00027829	1.67599	P02067	Hemoglobin subunit beta	HBB
9.89408e-06	1.61917	P80229	Leukocyte elastase inhibitor	SERPINB1
0.0040284	1.56787	Q9H7D7-2	WD repeat-containing protein 26	WDR26
0.000114845	1.56252	P49959-2	Double-strand break repair protein MRE11A	MRE11A
0.00869997	1.53851	Q9NPA0	ER membrane protein complex subunit 7	EMC7
0.00579775	1.50251	P01965	Hemoglobin subunit alpha	HBA
0.00465471	1.46147	P04181	Ornithine aminotransferase, mitochondrial;Ornithine aminotransferase, hepatic form;Ornithine aminotransferase, renal form	OAT
0.00438352	1.43285	Q29549	Clusterin	CLU
0.00121064	1.41159	P19619	Annexin A1	ANXA1
0.0023562	1.36143	Q16720-8	Plasma membrane calcium-transporting ATPase 3	ATP2B3
0.00799469	1.34187	P48729-3	Casein kinase I isoform alpha	CSNK1A1
7.79091e-05	1.33555	P62847-2	40S ribosomal protein S24	RPS24
0.000917231	1.30565	P54136-2	Arginine--tRNA ligase, cytoplasmic	RARS
0.00734213	1.26654	O95563	Mitochondrial pyruvate carrier 2	MPC2
0.00986618	1.1746	P49419-2	Alpha-aminoadipic semialdehyde dehydrogenase	ALDH7A1
0.00449549	1.15954	Q9N0F1	Dihydrolipoyllysine-residue succinyltransferase component of 2-oxoglutarate dehydrogenase complex, mitochondrial	DLST
0.00991105	0.897178	P62936	Peptidyl-prolyl cis-trans isomerase A;Peptidyl-prolyl cis-trans isomerase A, N-terminally processed	PPIA
0.000125014	0.865084	F1SPM8	AP2-associated protein kinase 1	AAK1
0.0056135	0.853911	Q9UI15	Transgelin-3	TAGLN3
1.3677e-05	0.849913	Q9UHD9	Ubiquilin-2	UBQLN2
0.00273916	0.825946	Q96FC7	Phytanoyl-CoA hydroxylase-interacting protein-like	PHYHIPL
0.00745185	0.807528	Q14257	Reticulocalbin-2	RCN2
0.00205002	0.805592	Q9BPU6	Dihydropyrimidinase-related protein 5	DPYSL5
0.000473434	0.788024	Q6SEG5	Ubiquitin carboxyl-terminal hydrolase isozyme L1	UCHL1
0.00328244	0.780272	O75122-3	CLIP-associating protein 2	CLASP2
0.00828728	0.779935	P26378-3	ELAV-like protein 4	ELAVL4
0.00203219	0.768011	P22676	Calretinin	CALB2
0.00324561	0.735897	P11172-2	Uridine 5-monophosphate synthase;Orotate phosphoribosyltransferase;Orotidine 5-phosphate decarboxylase	UMPS
0.00801689	0.717207	Q96JE9-2	Microtubule-associated protein 6	MAP6
0.00103247	0.649746	Q8WVH0	Complexin-3	CPLX3
0.00100785	0.633002	Q3I5G7	Alpha-synuclein	SNCA
0.000345996	0.594955	P35968	Vascular endothelial growth factor receptor 2	KDR
0.00623252	0.53952	Q9UKY7	Protein CDV3 homolog	CDV3
