# Supplementary material for: Large-Scale Protein Analysis of Experimental Retinal Artery Occlusion
Source: Int J Mol Sci. 2023 Apr 27;24(9):7919. doi: 10.3390/ijms24097919 (PMC10177937; doi:10.3390/ijms24097919)
Supplement: Supplementary file 1 [file ijms-24-07919-s001.zip › Table S5, Significantly changed proteins day three.xlsx]

## Sheet: Ark1
P-value	Difference	Protein IDs	Protein names	Gene names
2.57323e-06	59.0262	Q14315-2	Filamin-C	FLNC
0.00294429	7.4985	P14287	Osteopontin	SPP1
5.62822e-06	3.25599	Q29549	Clusterin	CLU
0.000382258	2.5919	P02067	Hemoglobin subunit beta	HBB
0.0083365	2.32943	Q02952-3	A-kinase anchor protein 12	AKAP12
0.00226176	2.29555	Q19S50	Signal transducer and activator of transcription 3	STAT3
0.0054381	2.15311	Q6P1M3	Lethal(2) giant larvae protein homolog 2	LLGL2
0.00411597	2.14015	Q7M2W6	Alpha-crystallin B chain	CRYAB
0.00403315	2.03555	P01965	Hemoglobin subunit alpha	HBA
0.00126539	2.02148	O15143	Actin-related protein 2/3 complex subunit 1B	ARPC1B
0.00148792	2.01393	Q9Y4E8-2	Ubiquitin carboxyl-terminal hydrolase 15	USP15
0.00536575	1.76936	Q15276-2	Rab GTPase-binding effector protein 1	RABEP1
0.00291788	1.71496	Q96HF1	Secreted frizzled-related protein 2	SFRP2
0.00434446	1.70177	P37198	Nuclear pore glycoprotein p62	NUP62
0.00687716	1.59937	O15511	Actin-related protein 2/3 complex subunit 5	ARPC5
0.00781994	1.59377	Q14254	Flotillin-2	FLOT2
0.00234898	1.58491	P30043	Flavin reductase (NADPH)	BLVRB
1.34461e-05	1.52498	P37802	Transgelin-2	TAGLN2
0.00253241	1.51379	P08621-3	U1 small nuclear ribonucleoprotein 70 kDa	SNRNP70
0.00191627	1.51034	O02799	Signal transducer and activator of transcription 2	STAT2
0.00894762	1.5065	Q9BVG4	Protein PBDC1	PBDC1
0.00283027	1.48618	P61006	Ras-related protein Rab-8A;Ras-related protein Rab-8B	RAB8A;RAB8B
0.000759389	1.47416	Q9H3U1-2	Protein unc-45 homolog A	UNC45A
0.00343651	1.44648	P60842	Eukaryotic initiation factor 4A-I	EIF4A1
0.00535078	1.44219	P51571	Translocon-associated protein subunit delta	SSR4
0.00700054	1.43691	Q9Y3A5	Ribosome maturation protein SBDS	SBDS
0.00837374	1.43052	P02543	Vimentin	VIM
0.00460578	1.4298	Q12797-10	Aspartyl/asparaginyl beta-hydroxylase	ASPH
0.00351995	1.41884	P19619	Annexin A1	ANXA1
0.00338329	1.37643	Q15691	Microtubule-associated protein RP/EB family member 1	MAPRE1
0.00580501	1.34422	O00299	Chloride intracellular channel protein 1	CLIC1
0.00171302	1.33546	P21333-2	Filamin-A	FLNA
0.00810155	1.31512	P09110	3-ketoacyl-CoA thiolase, peroxisomal	ACAA1
0.00279821	1.29592	P40429	60S ribosomal protein L13a;Putative 60S ribosomal protein L13a protein RPL13AP3	RPL13A;RPL13AP3
0.000717376	1.22619	Q99873-3	Protein arginine N-methyltransferase 1	PRMT1
0.00816573	1.16855	P28839	Cytosol aminopeptidase	LAP3
0.00748924	0.921399	Q01082	Spectrin beta chain, non-erythrocytic 1	SPTBN1
0.00108659	0.903101	P21281	V-type proton ATPase subunit B, brain isoform	ATP6V1B2
0.00117688	0.878768	P13637	Sodium/potassium-transporting ATPase subunit alpha-3	ATP1A3
0.000263631	0.851014	Q16555	Dihydropyrimidinase-related protein 2	DPYSL2
0.00962894	0.839446	P09972	Fructose-bisphosphate aldolase C	ALDOC
9.63238e-05	0.838313	Q14257	Reticulocalbin-2	RCN2
0.000983865	0.836447	P17600	Synapsin-1	SYN1
0.000250025	0.833946	F1SPM8	AP2-associated protein kinase 1	AAK1
0.000700083	0.826901	Q9ULU8	Calcium-dependent secretion activator 1	CADPS
0.00034216	0.826613	Q13554-2	Calcium/calmodulin-dependent protein kinase type II subunit beta	CAMK2B
0.000312527	0.820548	Q9UHD9	Ubiquilin-2	UBQLN2
0.00814806	0.818421	Q12860	Contactin-1	CNTN1
0.00954448	0.809146	Q99497	Protein deglycase DJ-1	PARK7
0.00297071	0.809104	P53041	Serine/threonine-protein phosphatase 5	PPP5C
0.00389704	0.80843	P43034	Platelet-activating factor acetylhydrolase IB subunit alpha	PAFAH1B1
0.00476494	0.800859	Q8NFW8	N-acylneuraminate cytidylyltransferase	CMAS
9.22433e-05	0.800731	Q9Y2J2	Band 4.1-like protein 3;Band 4.1-like protein 3, N-terminally processed	EPB41L3
0.00115213	0.794613	Q14194-2	Dihydropyrimidinase-related protein 1	CRMP1
0.00028913	0.791329	P49418-2	Amphiphysin	AMPH
0.000306802	0.788659	O60641-4	Clathrin coat assembly protein AP180	SNAP91
0.00499236	0.785973	O75688-4	Protein phosphatase 1B	PPM1B
0.000658948	0.770752	P62760	Visinin-like protein 1	VSNL1
0.00207591	0.770706	Q6SEG5	Ubiquitin carboxyl-terminal hydrolase isozyme L1	UCHL1
0.00229192	0.7615	Q9Y4Z0	U6 snRNA-associated Sm-like protein LSm4	LSM4
0.000246564	0.761018	P30044-2	Peroxiredoxin-5, mitochondrial	PRDX5
0.000748386	0.760069	Q9H4G0	Band 4.1-like protein 1	EPB41L1
0.00833302	0.748939	Q06AT1	Neuron-specific calcium-binding protein hippocalcin	HPCA
0.000820735	0.744054	Q9UI15	Transgelin-3	TAGLN3
0.00328152	0.733288	O43426-4	Synaptojanin-1	SYNJ1
0.0021391	0.726533	Q15700-3	Disks large homolog 2	DLG2
0.00169778	0.724568	P57721-5	Poly(rC)-binding protein 3	PCBP3
0.00201354	0.723344	O00139-2	Kinesin-like protein KIF2A	KIF2A
1.7366e-06	0.707425	Q12955	Ankyrin-3	ANK3
0.00830731	0.704195	A6NHQ2	rRNA/tRNA 2-O-methyltransferase fibrillarin-like protein 1	FBLL1
0.00344839	0.699639	P61601	Neurocalcin-delta	NCALD
0.00215112	0.69884	Q9C040	Tripartite motif-containing protein 2	TRIM2
0.00631479	0.691992	Q2TB90	Putative hexokinase HKDC1	HKDC1
0.00946602	0.687683	Q96GD0	Pyridoxal phosphate phosphatase	PDXP
0.00291205	0.653914	O15020	Spectrin beta chain, non-erythrocytic 2	SPTBN2
0.00589872	0.648197	O95718	Steroid hormone receptor ERR2	ESRRB
0.00139431	0.633019	P26378-3	ELAV-like protein 4	ELAVL4
0.00557692	0.625492	Q9H7Z7	Prostaglandin E synthase 2;Prostaglandin E synthase 2 truncated form	PTGES2
0.00676897	0.614472	Q8WVH0	Complexin-3	CPLX3
0.00283552	0.591038	Q9UK22	F-box only protein 2	FBXO2
0.00108283	0.576202	Q12926	ELAV-like protein 2	ELAVL2
0.00253852	0.565858	P60880-2	Synaptosomal-associated protein 25	SNAP25
0.00190017	0.545377	Q3I5G7	Alpha-synuclein	SNCA
0.00301481	0.52244	Q9H1E3	Nuclear ubiquitous casein and cyclin-dependent kinase substrate 1	NUCKS1
0.000119308	0.457367	Q9H598	Vesicular inhibitory amino acid transporter	SLC32A1
0.00249296	0.449715	O15083	ERC protein 2	ERC2
