# Supplementary material for: Large-Scale Protein Analysis of Experimental Retinal Artery Occlusion
Source: Int J Mol Sci. 2023 Apr 27;24(9):7919. doi: 10.3390/ijms24097919 (PMC10177937; doi:10.3390/ijms24097919)
Supplement: Supplementary file 1 [file ijms-24-07919-s001.zip › Table S6, Significantly changed proteins day six.xlsx]

## Sheet: Ark1
P-value	Difference	Protein IDs	Protein names	Gene names	Present on day 1 or 3
2.82056e-09	83.561	Q14315-2	Filamin-C	FLNC	day 1+3
1.67731e-06	14.7046	P13796	Plastin-2	LCP1
1.28621e-06	14.4208	P14287	Osteopontin	SPP1	day 3
0.000429607	11.9126	P48819	Vitronectin	VTN
1.63192e-07	10.0951	Q14764	Major vault protein	MVP
0.00024398	8.78765	P02751-1	Fibronectin	FN1
0.00131498	8.17777	P06867	Plasminogen	PLG
0.00487093	7.41225	P00915	Carbonic anhydrase 1	CA1
0.00122673	6.13518	P02675	Fibrinogen beta chain	FGB
0.00147354	5.79817	P27594	Interferon-induced GTP-binding protein Mx1	MX1
0.00050361	5.17455	A7VK00	Interferon-induced GTP-binding protein Mx2	MX2
0.000449322	5.1175	P02679-2	Fibrinogen gamma chain	FGG
1.17275e-05	4.29312	P19133	Ferritin light chain	FTL
6.27644e-09	4.22587	Q29549	Clusterin	CLU	day 1+3
8.56585e-07	3.6725	O75369-2	Filamin-B	FLNB
0.00406041	3.64934	P00450	Ceruloplasmin	CP
4.91098e-06	3.46448	P18650	Apolipoprotein E	APOE
0.000100129	3.38801	P02067	Hemoglobin subunit beta	HBB	day 1+3
0.00170564	3.07193	O62839	Catalase	CAT
3.06455e-07	3.00791	Q6P1M3	Lethal(2) giant larvae protein homolog 2	LLGL2	day 3
6.21062e-06	2.91459	Q764M5	Signal transducer and activator of transcription 1	STAT1
0.000144263	2.81586	O15143	Actin-related protein 2/3 complex subunit 1B	ARPC1B	day 3
2.10906e-06	2.80505	Q19S50	Signal transducer and activator of transcription 3	STAT3	dag 3
0.000827706	2.69235	P01965	Hemoglobin subunit alpha	HBA1
3.10061e-05	2.67666	Q15417	Calponin-3	CNN3
4.93089e-07	2.65338	P19620	Annexin A2	ANXA2
1.90403e-05	2.61775	Q7M2W6	Alpha-crystallin B chain	CRYAB	day 3
0.000481155	2.60764	Q29095	Prostaglandin-H2 D-isomerase	PTGDS
1.37978e-05	2.58397	P17931	Galectin-3	LGALS3
0.00833702	2.54558	Q8MJ14	Glutathione peroxidase 1	GPX1
9.5173e-08	2.5042	P19619	Annexin A1	ANXA1	day 1+3
4.268e-05	2.50126	Q96TA1-2	Niban-like protein 1	FAM129B
0.00259028	2.38833	P18648	Apolipoprotein A1	APOA1
0.00873623	2.3688	P50447	Alpha-1-antitrypsin	SERPINA1
0.0010585	2.35293	P02794	Ferritin heavy chain	FTH1
3.48175e-07	2.27613	P37802	Transgelin-2	TAGLN2	day 3
0.00990452	2.26862	P29700	Alpha-2-HS-glycoprotein	AHSG
1.1207e-07	2.26329	P02543	Vimentin	VIM	day 3
1.48361e-06	2.24727	P08758	Annexin A5	ANXA5
0.000204957	2.22738	Q96CX2	BTB/POZ domain-containing protein KCTD12	KCTD12
0.00521107	2.202	Q9BUF5	Tubulin beta-6 chain	TUBB6
2.12363e-08	2.17235	P21333-2	Filamin-A	FLNA	day 3
1.92819e-05	2.11989	Q9BX66-9	Sorbin and SH3 domain-containing protein 1	SORBS1
3.3271e-06	2.11461	Q96HF1	Secreted frizzled-related protein 2	SFRP2	day 3
0.000174395	2.09164	Q9H223	EH domain-containing protein 4	EHD4
0.000379713	2.01828	O00161	Synaptosomal-associated protein 23	SNAP23
2.45201e-07	1.98843	P46940	Ras GTPase-activating-like protein IQGAP1	IQGAP1
9.83816e-05	1.98161	P14136-3	Glial fibrillary acidic protein	GFAP
0.00524706	1.98009	Q4FAT7	Beta-glucuronidase	GUSB
6.90415e-08	1.96858	O00299	Chloride intracellular channel protein 1	CLIC1	day 3
1.03645e-07	1.94174	P40121	Macrophage-capping protein	CAPG
0.00127851	1.91881	P27105	Erythrocyte band 7 integral membrane protein	STOM
0.00906713	1.91738	P04439-2	HLA class I histocompatibility antigen, A-3 alpha chain	HLA-A
0.000452505	1.91172	Q5GLZ8-6	Probable E3 ubiquitin-protein ligase HERC4	HERC4
0.00414924	1.90549	P21980-3	Protein-glutamine gamma-glutamyltransferase 2	TGM2
0.00465628	1.89232	O77564	Glutamate carboxypeptidase 2	FOLH1
0.00114155	1.87135	P84095	Rho-related GTP-binding protein RhoG	RHOG
0.00917518	1.85865	Q06210-2	Glutamine--fructose-6-phosphate aminotransferase [isomerizing] 1	GFPT1
2.66326e-05	1.85295	O15511	Actin-related protein 2/3 complex subunit 5	ARPC5	day 3
4.35155e-06	1.84961	Q96KP4-2	Cytosolic non-specific dipeptidase	CNDP2
1.38011e-05	1.84255	Q14254	Flotillin-2	FLOT2	day 3
5.98665e-05	1.83979	Q29099	Polypyrimidine tract-binding protein 1	PTBP1
0.000260711	1.83913	Q9UNF1-2	Melanoma-associated antigen D2	MAGED2
4.88604e-06	1.83774	Q5TZA2	Rootletin	CROCC
0.000428907	1.8247	P30043	Flavin reductase (NADPH)	BLVRB	day 3
0.00570706	1.82331	Q863Z0	Proteasome activator complex subunit 2	PSME2
9.06416e-05	1.81764	P62495-2	Eukaryotic peptide chain release factor subunit 1	ETF1
2.5276e-05	1.80406	Q09666	Neuroblast differentiation-associated protein AHNAK	AHNAK
0.00407421	1.80169	P09571	Serotransferrin	TF
0.000441085	1.78294	Q5PXT2	LIM and cysteine-rich domains protein 1	LMCD1
2.74327e-07	1.7742	Q64L94	Proteasome activator complex subunit 1	PSME1
0.0097688	1.76801	Q29116-2	Tenascin	TNC
1.29226e-05	1.76584	Q6NZI2	Polymerase I and transcript release factor	PTRF
7.67191e-05	1.75848	P09493-10	Tropomyosin alpha-1 chain	TPM1
1.00495e-06	1.72487	Q9Y490	Talin-1	TLN1
0.00403871	1.72375	P22102	Trifunctional purine biosynthetic protein adenosine-3;Phosphoribosylamine--glycine ligase;Phosphoribosylformylglycinamidine cyclo-ligase;Phosphoribosylglycinamide formyltransferase	GART
0.000113975	1.72198	Q9UKY7	Protein CDV3 homolog	CDV3	day 1
1.04349e-05	1.72174	Q13576	Ras GTPase-activating-like protein IQGAP2	IQGAP2
0.00293718	1.70942	O75351	Vacuolar protein sorting-associated protein 4B	VPS4B
0.0042256	1.70808	P55011-3	Solute carrier family 12 member 2	SLC12A2
4.36413e-06	1.70509	P60842	Eukaryotic initiation factor 4A-I	EIF4A1	day 3
4.03219e-07	1.70268	P35579	Myosin-9	MYH9
0.00294759	1.6988	Q96NY7-2	Chloride intracellular channel protein 6	CLIC6
0.000189536	1.68524	Q9Y6E2	Basic leucine zipper and W2 domain-containing protein 2	BZW2
6.58988e-06	1.67895	P26038	Moesin	MSN
3.96053e-05	1.67619	O60716	Catenin delta-1	CTNND1
0.0089788	1.66393	Q8N4S7-3	Progestin and adipoQ receptor family member 4	PAQR4
0.00237614	1.65718	Q15276-2	Rab GTPase-binding effector protein 1	RABEP1	day 3
4.36259e-05	1.65295	Q9H4A4	Aminopeptidase B	RNPEP
1.34876e-07	1.64637	P13797	Plastin-3	PLS3
0.000739549	1.64489	Q9Y4E8-2	Ubiquitin carboxyl-terminal hydrolase 15	USP15	day 3
0.0056125	1.64421	Q04206-2	Transcription factor p65	RELA
0.00269787	1.6409	Q7Z3U7-2	Protein MON2 homolog	MON2
0.00438508	1.64052	Q92614-4	Unconventional myosin-XVIIIa	MYO18A
0.00441612	1.6289	P15311	Ezrin	EZR
0.0058944	1.62643	P21127	Cyclin-dependent kinase 11B;Cyclin-dependent kinase 11A	CDK11B;CDK11A
0.00841062	1.62272	Q9BVG4	Protein PBDC1	PBDC1	day 3
0.000195969	1.61754	O62787	Solute carrier family 2, facilitated glucose transporter member 3	SLC2A3
0.000979665	1.61037	P20112	SPARC	SPARC
0.0052885	1.60138	P23921	Ribonucleoside-diphosphate reductase large subunit	RRM1
0.00444259	1.59977	P11586	C-1-tetrahydrofolate synthase, cytoplasmic;Methylenetetrahydrofolate dehydrogenase;Methenyltetrahydrofolate cyclohydrolase;Formyltetrahydrofolate synthetase;C-1-tetrahydrofolate synthase, cytoplasmic, N-terminally processed	MTHFD1
6.41661e-05	1.58156	O02799	Signal transducer and activator of transcription 2	STAT2	day 3
0.00176092	1.56211	P55265-5	Double-stranded RNA-specific adenosine deaminase	ADAR
5.81236e-05	1.56121	P20305	Gelsolin (Fragment)	GSN
5.25961e-05	1.53897	Q6DD88	Atlastin-3	ATL3
6.9179e-05	1.53842	Q5W9D5	Protein quaking	QKI
0.000329923	1.51898	P52565	Rho GDP-dissociation inhibitor 1	ARHGDIA
0.00904821	1.51457	P49902-2	Cytosolic purine 5-nucleotidase	NT5C2
0.00161959	1.49843	P12004	Proliferating cell nuclear antigen	PCNA
0.00953678	1.49825	Q7L576	Cytoplasmic FMR1-interacting protein 1	CYFIP1
0.000890011	1.49731	Q9NY27	Serine/threonine-protein phosphatase 4 regulatory subunit 2	PPP4R2
0.00066662	1.49077	Q13409-2	Cytoplasmic dynein 1 intermediate chain 2	DYNC1I2
0.00208831	1.48919	Q13283	Ras GTPase-activating protein-binding protein 1	G3BP1
3.6994e-05	1.47942	P62847-2	40S ribosomal protein S24	RPS24	dag 1
0.000294735	1.4786	P62753	40S ribosomal protein S6	RPS6
6.12128e-05	1.46827	P00795	Cathepsin D	CTSD
3.35373e-05	1.46667	Q9H3U1-2	Protein unc-45 homolog A	UNC45A	day 3
0.000241013	1.46512	P0C5I2	Mannose-1-phosphate guanyltransferase beta	GMPPB
3.09852e-05	1.46115	Q767L6	Flotillin-1	FLOT1
0.000598018	1.45747	Q13177	Serine/threonine-protein kinase PAK 2;PAK-2p27;PAK-2p34	PAK2
0.000978347	1.45567	P13667	Protein disulfide-isomerase A4	PDIA4
0.00265763	1.45294	O95758-1	Polypyrimidine tract-binding protein 3	PTBP3
0.00138557	1.4528	Q8TD19	Serine/threonine-protein kinase Nek9	NEK9
1.29976e-05	1.44466	Q9NUQ9	Protein FAM49B	FAM49B
0.00882526	1.44175	O75038-2	1-phosphatidylinositol 4,5-bisphosphate phosphodiesterase eta-2	PLCH2
0.00291437	1.43951	P05198	Eukaryotic translation initiation factor 2 subunit 1	EIF2S1
0.00349188	1.4354	Q58EX2-3	Protein sidekick-2	SDK2
0.00124266	1.43504	P46976	Glycogenin-1	GYG1
0.000295013	1.43248	Q15366-6	Poly(rC)-binding protein 2	PCBP2
0.00242793	1.43214	Q96HC4-3	PDZ and LIM domain protein 5	PDLIM5
0.00497541	1.43198	P20073-2	Annexin A7	ANXA7
0.00621494	1.42982	P48506	Glutamate--cysteine ligase catalytic subunit	GCLC
0.00584198	1.42575	Q6QGC0	PDZ and LIM domain protein 3	PDLIM3
0.000419539	1.42347	Q99829	Copine-1	CPNE1
0.00188786	1.42345	P50395	Rab GDP dissociation inhibitor beta	GDI2
8.44503e-05	1.42325	P61158	Actin-related protein 3	ACTR3
0.00085979	1.42204	Q13045-2	Protein flightless-1 homolog	FLII
0.00400948	1.41792	Q6IQ23	Pleckstrin homology domain-containing family A member 7	PLEKHA7
1.31566e-05	1.41664	P80229	Leukocyte elastase inhibitor	SERPINB1	day 1
0.000726891	1.41461	Q9NZM3-2	Intersectin-2	ITSN2
0.00029669	1.40795	P22234	Multifunctional protein ADE2;Phosphoribosylaminoimidazole-succinocarboxamide synthase;Phosphoribosylaminoimidazole carboxylase	PAICS
3.49674e-05	1.40444	O43852	Calumenin	CALU
0.00115197	1.40124	P51571	Translocon-associated protein subunit delta	SSR4	day 3
0.000627314	1.40054	Q9Y5L0-5	Transportin-3	TNPO3
0.00793476	1.39871	Q6IBS0	Twinfilin-2	TWF2
0.00887939	1.39754	Q99805	Transmembrane 9 superfamily member 2	TM9SF2
0.00556045	1.39671	Q9HAU5	Regulator of nonsense transcripts 2	UPF2
2.45916e-07	1.39162	O43707	Alpha-actinin-4	ACTN4
0.00962629	1.39058	Q8SQ26	Lambda-crystallin homolog	CRYL1
0.00599882	1.38726	P53590	Succinyl-CoA ligase [GDP-forming] subunit beta, mitochondrial	SUCLG2
7.64464e-05	1.38666	P57723	Poly(rC)-binding protein 4	PCBP4
4.25018e-05	1.38607	P19022-2	Cadherin-2	CDH2
1.05224e-05	1.38516	P26234-2	Vinculin	VCL
0.0030969	1.38489	Q01581	Hydroxymethylglutaryl-CoA synthase, cytoplasmic	HMGCS1
0.0050977	1.38209	Q96S59	Ran-binding protein 9	RANBP9
0.00655822	1.37734	O60333-2	Kinesin-like protein KIF1B	KIF1B
1.98084e-05	1.37152	Q15149	Plectin	PLEC
0.00390766	1.36758	P49137-2	MAP kinase-activated protein kinase 2	MAPKAPK2
0.0036981	1.36386	Q5ISC6	Heme-binding protein 1	HEBP1
0.00745493	1.35926	Q07960	Rho GTPase-activating protein 1	ARHGAP1
0.00756989	1.357	Q04760-2	Lactoylglutathione lyase	GLO1
0.000122322	1.35475	P62263	40S ribosomal protein S14	RPS14
0.00211318	1.35286	Q863I2	Serine/threonine-protein kinase OSR1	OXSR1
0.00162511	1.35194	O75150	E3 ubiquitin-protein ligase BRE1B	RNF40
0.00274319	1.35119	Q9Y3A5	Ribosome maturation protein SBDS	SBDS	day 3
0.00101293	1.34512	P46783	40S ribosomal protein S10	RPS10
3.89723e-06	1.33872	P35221	Catenin alpha-1	CTNNA1
0.000104981	1.33796	Q14344-2	Guanine nucleotide-binding protein subunit alpha-13	GNA13
1.09129e-06	1.33788	P13639	Elongation factor 2	EEF2
0.00111039	1.3364	Q29361	60S ribosomal protein L35	RPL35
0.00457694	1.33269	Q92597	Protein NDRG1	NDRG1
0.000659659	1.31947	P18085	ADP-ribosylation factor 4	ARF4
0.0013852	1.31786	P19105	Myosin regulatory light chain 12A;Myosin regulatory light chain 12B;Myosin regulatory light polypeptide 9	MYL12A;MYL12B;MYL9
0.00168583	1.31511	P35750	Calpain-1 catalytic subunit	CAPN1
0.0036992	1.3102	P62831	60S ribosomal protein L23	RPL23
0.0016326	1.30555	Q6UN15	Pre-mRNA 3-end-processing factor FIP1	FIP1L1
0.000146932	1.30539	O00410	Importin-5	IPO5
0.0017182	1.30483	P50454	Serpin H1	SERPINH1
0.00502034	1.30214	P26044	Radixin	RDX
0.00515698	1.30083	Q09138	5-AMP-activated protein kinase subunit gamma-1	PRKAG1
0.000480394	1.29937	Q9Y3P9	Rab GTPase-activating protein 1	RABGAP1
0.00583848	1.29339	Q92538-3	Golgi-specific brefeldin A-resistance guanine nucleotide exchange factor 1	GBF1
0.00147135	1.29171	Q15084-3	Protein disulfide-isomerase A6	PDIA6
0.00962181	1.28992	P11413	Glucose-6-phosphate 1-dehydrogenase	G6PD
0.000316555	1.28433	P20042	Eukaryotic translation initiation factor 2 subunit 2	EIF2S2
0.000630423	1.27864	A1XQU3	60S ribosomal protein L14	RPL14
8.28812e-06	1.2775	P55209-2	Nucleosome assembly protein 1-like 1	NAP1L1
0.00638486	1.27684	Q15075	Early endosome antigen 1	EEA1
0.00080621	1.27467	Q00403	Transcription initiation factor IIB	GTF2B
0.00650867	1.27279	Q9HCB6	Spondin-1	SPON1
0.000193906	1.27078	P28066	Proteasome subunit alpha type-5	PSMA5
0.00302086	1.26778	Q09028-3	Histone-binding protein RBBP4	RBBP4
0.00665911	1.26276	Q9GKQ9	Mothers against decapentaplegic homolog 4	SMAD4
0.000108184	1.2626	P25789	Proteasome subunit alpha type-4	PSMA4
0.00150962	1.2568	Q95342	60S ribosomal protein L18	RPL18
0.000522471	1.25554	P51665	26S proteasome non-ATPase regulatory subunit 7	PSMD7
9.96067e-06	1.25424	P68104	Elongation factor 1-alpha 1;Putative elongation factor 1-alpha-like 3	EEF1A1;EEF1A1P5
0.00739794	1.23859	P17844	Probable ATP-dependent RNA helicase DDX5	DDX5
0.00530386	1.23462	P07237	Protein disulfide-isomerase	P4HB
0.00324335	1.23215	Q15691	Microtubule-associated protein RP/EB family member 1	MAPRE1	day 3
7.70411e-05	1.2297	P28839	Cytosol aminopeptidase	LAP3	day 3
0.000820248	1.22688	P61288	Translationally-controlled tumor protein;TPT1-like protein	TPT1
0.00510039	1.22573	P55010	Eukaryotic translation initiation factor 5	EIF5
0.00412159	1.21956	Q96P70	Importin-9	IPO9
0.00884657	1.21805	P23381-2	Tryptophan--tRNA ligase, cytoplasmic;T1-TrpRS;T2-TrpRS	WARS
0.000561081	1.21786	P04899	Guanine nucleotide-binding protein G(i) subunit alpha-2	GNAI2
0.00543674	1.21578	Q9Y6M1-1	Insulin-like growth factor 2 mRNA-binding protein 2	IGF2BP2
0.0048742	1.21043	Q45FY6	Hypoxanthine-guanine phosphoribosyltransferase	HPRT1
0.00114811	1.21009	Q8WVM8	Sec1 family domain-containing protein 1	SCFD1
0.00715139	1.20892	Q9BZV3	Interphotoreceptor matrix proteoglycan 2	IMPG2
0.000124675	1.2075	P23687	Prolyl endopeptidase	PREP
0.00230012	1.20461	P09110	3-ketoacyl-CoA thiolase, peroxisomal	ACAA1	day 3
0.00374701	1.20264	Q07954	Prolow-density lipoprotein receptor-related protein 1;Low-density lipoprotein receptor-related protein 1 85 kDa subunit;Low-density lipoprotein receptor-related protein 1 515 kDa subunit;Low-density lipoprotein receptor-related protein 1 intracellular domain	LRP1
8.66733e-05	1.19916	Q99873-3	Protein arginine N-methyltransferase 1	PRMT1	day 3
0.000609211	1.19711	P82460	Thioredoxin	TXN
0.00423336	1.19462	P09661	U2 small nuclear ribonucleoprotein A	SNRPA1
0.000971477	1.18947	P35222	Catenin beta-1	CTNNB1
0.00895328	1.18834	Q06830	Peroxiredoxin-1	PRDX1
0.0057478	1.18725	P36578	60S ribosomal protein L4	RPL4
0.00381928	1.18705	P46405	40S ribosomal protein S12	RPS12
0.00194054	1.17983	P10668	Cofilin-1	CFL1
0.00203664	1.17466	P06737-2	Glycogen phosphorylase, liver form	PYGL
0.000244619	1.17433	P35606-2	Coatomer subunit beta	COPB2
0.00313294	1.17421	P60228	Eukaryotic translation initiation factor 3 subunit E	EIF3E
0.00581683	1.17244	Q86V81	THO complex subunit 4	ALYREF
2.46976e-06	1.17053	P46821	Microtubule-associated protein 1B;MAP1B heavy chain;MAP1 light chain LC1	MAP1B
0.0036346	1.16885	Q14152	Eukaryotic translation initiation factor 3 subunit A	EIF3A
0.0022774	1.1675	P62241	40S ribosomal protein S8	RPS8
2.54633e-05	1.16576	Q29092	Endoplasmin	HSP90B1
0.00937373	1.1628	P54578	Ubiquitin carboxyl-terminal hydrolase 14	USP14
0.00183416	1.16066	P53621	Coatomer subunit alpha;Xenin;Proxenin	COPA
0.00202868	1.16064	P62906	60S ribosomal protein L10a	RPL10A
0.00902925	1.15548	P52907	F-actin-capping protein subunit alpha-1	CAPZA1
0.00850042	1.15199	Q15019	Septin-2	SEPT2
0.00797112	1.14252	P11940	Polyadenylate-binding protein 1	PABPC1
0.00459346	1.14174	P06733	Alpha-enolase	ENO1
0.000100807	1.13921	Q16531	DNA damage-binding protein 1	DDB1
0.00529186	1.13879	P62197	26S protease regulatory subunit 8	PSMC5
0.00566067	1.13834	Q9UEY8-2	Gamma-adducin	ADD3
0.00894895	1.1379	P49327	Fatty acid synthase;[Acyl-carrier-protein] S-acetyltransferase;[Acyl-carrier-protein] S-malonyltransferase;3-oxoacyl-[acyl-carrier-protein] synthase;3-oxoacyl-[acyl-carrier-protein] reductase;3-hydroxyacyl-[acyl-carrier-protein] dehydratase;Enoyl-[acyl-carrier-protein] reductase;Oleoyl-[acyl-carrier-protein] hydrolase	FASN
0.00429024	1.13726	P62333	26S protease regulatory subunit 10B	PSMC6
0.00264827	1.13534	Q00688	Peptidyl-prolyl cis-trans isomerase FKBP3	FKBP3
0.00217562	1.13259	P60900	Proteasome subunit alpha type-6	PSMA6
0.00871779	1.1315	O60506	Heterogeneous nuclear ribonucleoprotein Q	SYNCRIP
0.00117097	1.12484	O43776	Asparagine--tRNA ligase, cytoplasmic	NARS
0.00182107	1.12295	P30101	Protein disulfide-isomerase A3	PDIA3
0.00256382	1.1226	Q9Y262-2	Eukaryotic translation initiation factor 3 subunit L	EIF3L
0.00407725	1.11141	P11021	78 kDa glucose-regulated protein	HSPA5
0.00642559	1.10735	Q9Y230-2	RuvB-like 2	RUVBL2
0.00610092	1.10462	O00231	26S proteasome non-ATPase regulatory subunit 11	PSMD11
0.00487576	1.06714	Q14204	Cytoplasmic dynein 1 heavy chain 1	DYNC1H1
0.00727624	0.912505	O95782-2	AP-2 complex subunit alpha-1	AP2A1
0.00745715	0.901172	P62318-2	Small nuclear ribonucleoprotein Sm D3	SNRPD3
0.000631944	0.901064	Q01082	Spectrin beta chain, non-erythrocytic 1	SPTBN1	day 3
0.0031233	0.901048	Q9Y4G6	Talin-2	TLN2
0.00174799	0.896267	Q9Y224	UPF0568 protein C14orf166	C14orf166
0.00298652	0.889687	P00336	L-lactate dehydrogenase B chain	LDHB
0.00386587	0.886537	O95757	Heat shock 70 kDa protein 4L	HSPA4L
0.00127677	0.88508	Q13813-2	Spectrin alpha chain, non-erythrocytic 1	SPTAN1
0.00623971	0.877	O75688-4	Protein phosphatase 1B	PPM1B	day 3
0.00560652	0.876219	P38646	Stress-70 protein, mitochondrial	HSPA9
0.00367329	0.873861	Q16891-3	MICOS complex subunit MIC60	IMMT
0.00445766	0.870329	P10173-2	Fumarate hydratase, mitochondrial	FH
2.14523e-05	0.864836	Q00610-2	Clathrin heavy chain 1	CLTC
0.003977	0.864534	Q710C4	Adenosylhomocysteinase	AHCY
0.00959824	0.858777	Q9N0F1	Dihydrolipoyllysine-residue succinyltransferase component of 2-oxoglutarate dehydrogenase complex, mitochondrial	DLST	day 1
0.000351118	0.856627	P62936	Peptidyl-prolyl cis-trans isomerase A;Peptidyl-prolyl cis-trans isomerase A, N-terminally processed	PPIA	day 1
0.00767876	0.852239	Q9BV23	Monoacylglycerol lipase ABHD6	ABHD6
0.00795766	0.850727	P00889	Citrate synthase, mitochondrial	CS
0.00496756	0.842456	Q13509	Tubulin beta-3 chain	TUBB3
0.00112259	0.841247	P19086	Guanine nucleotide-binding protein G(z) subunit alpha	GNAZ
0.000355979	0.839462	Q29371	Triosephosphate isomerase	TPI1
0.000279321	0.839008	P06576	ATP synthase subunit beta, mitochondrial	ATP5B
0.000192138	0.835398	O19069	Succinate--CoA ligase [ADP/GDP-forming] subunit alpha, mitochondrial	SUCLG1
0.00194709	0.833804	Q9MZ15	Voltage-dependent anion-selective channel protein 2	VDAC2
0.000265937	0.832829	Q01484	Ankyrin-2	ANK2
0.00305137	0.83186	Q13555-10	Calcium/calmodulin-dependent protein kinase type II subunit gamma	CAMK2G
0.00526776	0.831306	Q16795	NADH dehydrogenase [ubiquinone] 1 alpha subcomplex subunit 9, mitochondrial	NDUFA9
0.000793839	0.831275	O00499-3	Myc box-dependent-interacting protein 1	BIN1
0.00803569	0.830675	P08133-2	Annexin A6	ANXA6
0.00210584	0.830604	P28331	NADH-ubiquinone oxidoreductase 75 kDa subunit, mitochondrial	NDUFS1
0.00143133	0.828681	P30044-2	Peroxiredoxin-5, mitochondrial	PRDX5	day 3
0.000729499	0.825724	Q14257	Reticulocalbin-2	RCN2	day 1+3
0.00610488	0.824321	P36887	cAMP-dependent protein kinase catalytic subunit alpha	PRKACA
0.000128162	0.822588	Q02978	Mitochondrial 2-oxoglutarate/malate carrier protein	SLC25A11
0.00224293	0.821959	P56545-2	C-terminal-binding protein 2	CTBP2
0.00402526	0.821113	Q5SSJ5	Heterochromatin protein 1-binding protein 3	HP1BP3
0.000847704	0.818101	P19404	NADH dehydrogenase [ubiquinone] flavoprotein 2, mitochondrial	NDUFV2
0.00174868	0.817266	Q2EN81	ATP synthase subunit O, mitochondrial	ATP5PO
0.00550534	0.817071	P29804	Pyruvate dehydrogenase E1 component subunit alpha, somatic form, mitochondrial	PDHA1
0.000346699	0.816541	Q0QF01	Succinate dehydrogenase [ubiquinone] flavoprotein subunit, mitochondrial	SDHA
0.00282122	0.81554	A5GFS8	Vesicle-associated membrane protein-associated protein B/C	VAPB
0.00856312	0.81519	P00506	Aspartate aminotransferase, mitochondrial	GOT2
0.000732935	0.814959	Q9UJS0	Calcium-binding mitochondrial carrier protein Aralar2	SLC25A13
0.00099605	0.813329	Q8NFW8	N-acylneuraminate cytidylyltransferase	CMAS	day 3
0.0001871	0.812658	Q29048	V-type proton ATPase catalytic subunit A	ATP6V1A
0.0001857	0.810019	P80021	ATP synthase subunit alpha, mitochondrial	ATP5FA1
0.00780555	0.808798	O95140	Mitofusin-2	MFN2
0.00126645	0.808073	P60028	Rab GDP dissociation inhibitor alpha	GDI1
7.5272e-06	0.808046	Q9Y2J2	Band 4.1-like protein 3;Band 4.1-like protein 3, N-terminally processed	EPB41L3	day 3
0.00260963	0.808016	Q29290	Cystatin-B	CSTB
0.00205934	0.807629	Q9BUJ2-4	Heterogeneous nuclear ribonucleoprotein U-like protein 1	HNRNPUL1
0.00105645	0.807302	O43837	Isocitrate dehydrogenase [NAD] subunit beta, mitochondrial	IDH3B
0.00136258	0.807285	Q9NSE4	Isoleucine--tRNA ligase, mitochondrial	IARS2
0.00074009	0.80653	P80147	4-aminobutyrate aminotransferase, mitochondrial	ABAT
0.0015843	0.805064	P05383	cAMP-dependent protein kinase catalytic subunit beta	PRKACB
6.82816e-08	0.802999	P21281	V-type proton ATPase subunit B, brain isoform	ATP6V1B2	day 3
0.000324825	0.802879	P09104	Gamma-enolase	ENO2
0.00164223	0.802855	O97580	Succinate--CoA ligase [ADP-forming] subunit beta, mitochondrial (Fragment)	SUCLA2
0.00789571	0.801552	P00571	Adenylate kinase isoenzyme 1	AK1
0.00287081	0.801238	P50213-2	Isocitrate dehydrogenase [NAD] subunit alpha, mitochondrial	IDH3A
9.34726e-06	0.801002	Q16555	Dihydropyrimidinase-related protein 2	DPYSL2	day 3
0.00159905	0.800792	Q13432	Protein unc-119 homolog A	UNC119
0.00308016	0.800461	P49821-2	NADH dehydrogenase [ubiquinone] flavoprotein 1, mitochondrial	NDUFV1
0.000101368	0.798738	P19367	Hexokinase-1	HK1
0.00497042	0.798005	P12235	ADP/ATP translocase 1	SLC25A4
0.00157747	0.797446	Q8IV08	Phospholipase D3	PLD3
0.000116565	0.797135	O00429-2	Dynamin-1-like protein	DNM1L
0.00822084	0.793278	O00562-2	Membrane-associated phosphatidylinositol transfer protein 1	PITPNM1
1.7727e-07	0.792406	F1SPM8	AP2-associated protein kinase 1	AAK1	day 1+3
0.00083033	0.791714	P51553	Isocitrate dehydrogenase [NAD] subunit gamma, mitochondrial	IDH3G
0.00567339	0.791549	Q14444-2	Caprin-1	CAPRIN1
0.00544272	0.789899	P36543	V-type proton ATPase subunit E 1	ATP6V1E1
0.00645794	0.788893	P11488	Guanine nucleotide-binding protein G(t) subunit alpha-1	GNAT1
0.000816327	0.788701	P21283	V-type proton ATPase subunit C 1	ATP6V1C1
0.00295055	0.788109	P02547	Neurofilament light polypeptide	NEFL
0.000454852	0.787338	Q00325-2	Phosphate carrier protein, mitochondrial	SLC25A3
0.000145778	0.786878	O75746	Calcium-binding mitochondrial carrier protein Aralar1	SLC25A12
2.80865e-06	0.786768	Q9TVC1-2	Isoform Beta of V-type proton ATPase subunit H	ATP6V1H
0.0030543	0.785517	Q2XSV9	Guanine nucleotide-binding protein subunit alpha-11	GNA11
0.000143362	0.785272	Q9MZ16	Voltage-dependent anion-selective channel protein 1	VDAC1
0.000811252	0.784678	Q4G0F5	Vacuolar protein sorting-associated protein 26B	VPS26B
0.00166596	0.783053	Q9Y4E6-2	WD repeat-containing protein 7	WDR7
0.00241581	0.781709	P42704	Leucine-rich PPR motif-containing protein, mitochondrial	LRPPRC
2.01401e-05	0.781703	P11708	Malate dehydrogenase, cytoplasmic	MDH1
0.00339376	0.781369	Q96GK7	Fumarylacetoacetate hydrolase domain-containing protein 2A;Fumarylacetoacetate hydrolase domain-containing protein 2B	FAHD2A;FAHD2B
0.000261342	0.780564	P00346	Malate dehydrogenase, mitochondrial	MDH2
0.000182807	0.780137	P09623	Dihydrolipoyl dehydrogenase, mitochondrial	DLD
0.00184321	0.778981	Q8IYB5-3	Stromal membrane-associated protein 1	SMAP1
0.00582296	0.777807	Q13526	Peptidyl-prolyl cis-trans isomerase NIMA-interacting 1	PIN1
0.00870015	0.776895	Q9UDX5	Mitochondrial fission process protein 1	MTFP1
5.16173e-05	0.776706	P11177	Pyruvate dehydrogenase E1 component subunit beta, mitochondrial	PDHB
0.00180623	0.775944	P05141	ADP/ATP translocase 2;ADP/ATP translocase 2, N-terminally processed	SLC25A5
0.00131247	0.774685	P52306-2	Rap1 GTPase-GDP dissociation stimulator 1	RAP1GDS1
4.47109e-05	0.774056	P23220	Plasma membrane calcium-transporting ATPase 1	ATP2B1
0.000112608	0.773809	P10515	Dihydrolipoyllysine-residue acetyltransferase component of pyruvate dehydrogenase complex, mitochondrial	DLAT
0.000507894	0.77255	P0DP25	Calmodulin-3	CALM3
0.000594955	0.772458	Q00577	Transcriptional activator protein Pur-alpha	PURA
0.00299799	0.772411	Q02790	Peptidyl-prolyl cis-trans isomerase FKBP4;Peptidyl-prolyl cis-trans isomerase FKBP4, N-terminally processed	FKBP4
0.00217769	0.772022	Q5SYC1	Clavesin-2	CLVS2
5.30944e-06	0.771358	Q01433-3	AMP deaminase 2	AMPD2
0.000471946	0.769947	Q9BY11	Protein kinase C and casein kinase substrate in neurons protein 1	PACSIN1
0.00830707	0.769242	O95197-7	Reticulon-3	RTN3
0.00395252	0.769024	P12532	Creatine kinase U-type, mitochondrial	CKMT1A
0.00028955	0.768417	O00139-2	Kinesin-like protein KIF2A	KIF2A	day 3
0.00392253	0.765785	P17252	Protein kinase C alpha type	PRKCA
2.15319e-05	0.765727	Q6SEG5	Ubiquitin carboxyl-terminal hydrolase isozyme L1	UCHL1	day 1+3
4.011e-06	0.76542	Q93050-1	V-type proton ATPase 116 kDa subunit a isoform 1	ATP6V0A1
0.000888362	0.765034	O00154-6	Cytosolic acyl coenzyme A thioester hydrolase	ACOT7
0.00249638	0.763187	Q96FC7	Phytanoyl-CoA hydroxylase-interacting protein-like	PHYHIPL	day 1
0.00495458	0.762935	Q16864	V-type proton ATPase subunit F	ATP6V1F
2.7102e-05	0.762436	O94856-9	Neurofascin	NFASC
0.00657224	0.76185	Q8TC12	Retinol dehydrogenase 11	RDH11
8.39924e-05	0.761149	P50667	Cytochrome c oxidase subunit 2	MT-CO2
3.00861e-05	0.760191	Q15555-5	Microtubule-associated protein RP/EB family member 2	MAPRE2
0.000314826	0.759959	O43426-4	Synaptojanin-1	SYNJ1	day 3
9.42086e-05	0.759484	Q2MJV8	Paralemmin-1	PALM
0.00031869	0.758212	Q06AT1	Neuron-specific calcium-binding protein hippocalcin	HPCA	day 3
0.00189942	0.757722	O18868	Potassium voltage-gated channel subfamily B member 1	KCNB1
0.00097763	0.757666	P11137-3	Microtubule-associated protein 2	MAP2
0.00214656	0.757365	P16520	Guanine nucleotide-binding protein G(I)/G(S)/G(T) subunit beta-3	GNB3
0.000188378	0.756725	Q8IXI2	Mitochondrial Rho GTPase 1	RHOT1
0.00026379	0.75578	P16276	Aconitate hydratase, mitochondrial	ACO2
0.00806838	0.75518	Q9NQX3	Gephyrin;Molybdopterin adenylyltransferase;Molybdopterin molybdenumtransferase	GPHN
6.12868e-05	0.754509	P00503	Aspartate aminotransferase, cytoplasmic	GOT1
1.16402e-05	0.754071	P09972	Fructose-bisphosphate aldolase C	ALDOC	day 3
0.00746952	0.753272	O14576-2	Cytoplasmic dynein 1 intermediate chain 1	DYNC1I1
0.000252077	0.749449	Q02153	Guanylate cyclase soluble subunit beta-1	GUCY1B3
8.72364e-05	0.746813	P08574	Cytochrome c1, heme protein, mitochondrial	CYC1
1.56804e-05	0.745786	P62873	Guanine nucleotide-binding protein G(I)/G(S)/G(T) subunit beta-1	GNB1
0.000888543	0.745502	P61981	14-3-3 protein gamma;14-3-3 protein gamma, N-terminally processed	YWHAG
0.00231521	0.740486	Q9GZN7	Protein rogdi homolog	ROGDI
0.00615703	0.739791	O15394	Neural cell adhesion molecule 2	NCAM2
0.00216764	0.738967	Q7Z7G2	Complexin-4	CPLX4
2.79108e-07	0.736449	A5A761	Sideroflexin-1	SFXN1
0.00307474	0.733178	Q86U28	Iron-sulfur cluster assembly 2 homolog, mitochondrial	ISCA2
0.000403032	0.731908	P60520	Gamma-aminobutyric acid receptor-associated protein-like 2	GABARAPL2
0.00384506	0.73174	Q9H9P8	L-2-hydroxyglutarate dehydrogenase, mitochondrial	L2HGDH
0.000488754	0.731691	Q9H115	Beta-soluble NSF attachment protein	NAPB
4.71915e-06	0.730659	P09471	Guanine nucleotide-binding protein G(o) subunit alpha	GNAO1
0.00574998	0.727852	O14936-4	Peripheral plasma membrane protein CASK	CASK
0.00889109	0.726118	O75569-3	Interferon-inducible double-stranded RNA-dependent protein kinase activator A	PRKRA
1.74568e-06	0.725685	Q13554-2	Calcium/calmodulin-dependent protein kinase type II subunit beta	CAMK2B	day 3
4.6335e-06	0.723578	P61421	V-type proton ATPase subunit d 1	ATP6V0D1
0.00390303	0.723122	P07196	Neurofilament light polypeptide	NEFL
0.00365524	0.722945	Q16537-2	Serine/threonine-protein phosphatase 2A 56 kDa regulatory subunit epsilon isoform	PPP2R5E
1.01909e-06	0.722264	P46459	Vesicle-fusing ATPase	NSF
7.85559e-05	0.721694	Q7YS78	Arrestin-C	ARR3
2.8933e-06	0.721205	P13637	Sodium/potassium-transporting ATPase subunit alpha-3	ATP1A3	day 3
0.0035051	0.719805	Q99719	Septin-5	SEPT5
6.95284e-06	0.719796	Q12860	Contactin-1	CNTN1	day 3
0.000138001	0.719736	Q7Z4S6-6	Kinesin-like protein KIF21A	KIF21A
5.99871e-07	0.71926	P78559	Microtubule-associated protein 1A;MAP1A heavy chain;MAP1 light chain LC2	MAP1A
2.99485e-05	0.719069	Q9P260-2	LisH domain and HEAT repeat-containing protein KIAA1468	KIAA1468
0.000989764	0.718632	Q95339	ATP synthase subunit f, mitochondrial	ATP5MF
9.5416e-05	0.718562	O75122-3	CLIP-associating protein 2	CLASP2	day 1
1.32996e-05	0.71817	P21579	Synaptotagmin-1	SYT1
0.000144444	0.718065	Q13825	Methylglutaconyl-CoA hydratase, mitochondrial	AUH
3.04771e-06	0.715887	Q05193-5	Dynamin-1	DNM1
0.000783695	0.711813	Q13491-3	Neuronal membrane glycoprotein M6-b	GPM6B
2.27742e-05	0.710681	O94826	Mitochondrial import receptor subunit TOM70	TOMM70A
0.00169377	0.710214	O14775	Guanine nucleotide-binding protein subunit beta-5	GNB5
0.00981078	0.707312	O95057	GTP-binding protein Di-Ras1	DIRAS1
0.00870244	0.706963	Q9H936	Mitochondrial glutamate carrier 1	SLC25A22
0.00144172	0.706915	Q92752-2	Tenascin-R	TNR
1.74291e-05	0.705715	Q9H2X9-2	Solute carrier family 12 member 5	SLC12A5
0.000301229	0.705658	P46410	Glutamine synthetase	GLUL
9.42154e-06	0.705372	P49418-2	Amphiphysin	AMPH	day 3
0.00686851	0.704867	Q8N2K0-3	Monoacylglycerol lipase ABHD12	ABHD12
0.000130034	0.704568	O94925	Glutaminase kidney isoform, mitochondrial	GLS
0.00172875	0.703908	O75323	Protein NipSnap homolog 2	GBAS
1.62966e-05	0.702849	Q99962	Endophilin-A1	SH3GL2
0.00637541	0.702806	P36542-2	ATP synthase subunit gamma, mitochondrial	ATP5C1
1.61149e-05	0.702704	P57721-5	Poly(rC)-binding protein 3	PCBP3	day 3
0.00886452	0.699703	Q96E17	Ras-related protein Rab-3C	RAB3C
0.0006297	0.698793	P43034	Platelet-activating factor acetylhydrolase IB subunit alpha	PAFAH1B1	day 3
0.00653849	0.698412	P51784	Ubiquitin carboxyl-terminal hydrolase 11	USP11
4.26847e-05	0.698039	Q14141-2	Septin-6	SEPT6
0.000216829	0.697351	Q8WY54	Protein phosphatase 1E	PPM1E
5.02185e-06	0.697286	Q06AU3	Ras-related protein Rab-3A	RAB3A
6.20563e-07	0.695828	Q9ULU8	Calcium-dependent secretion activator 1	CADPS	day 3
8.17683e-05	0.694749	P78356	Phosphatidylinositol 5-phosphate 4-kinase type-2 beta	PIP4K2B
8.22743e-06	0.694664	P29762	Cellular retinoic acid-binding protein 1	CRABP1
1.73533e-05	0.694327	O43301	Heat shock 70 kDa protein 12A	HSPA12A
1.19703e-05	0.694195	Q9UQ16-2	Dynamin-3	DNM3
0.00165418	0.692781	Q96HU8	GTP-binding protein Di-Ras2	DIRAS2
0.00101096	0.691933	Q96JE9-2	Microtubule-associated protein 6	MAP6	day 1
2.07839e-06	0.691375	Q9BPU6	Dihydropyrimidinase-related protein 5	DPYSL5	day 1
4.56429e-05	0.690569	Q9UBB6-2	Neurochondrin	NCDN
0.000611269	0.689493	Q92777-2	Synapsin-2	SYN2
0.000327023	0.689099	Q92823-3	Neuronal cell adhesion molecule	NRCAM
0.000857551	0.687536	A6NHQ2	rRNA/tRNA 2-O-methyltransferase fibrillarin-like protein 1	FBLL1	day 3
0.00132686	0.687515	P35612-2	Beta-adducin	ADD2
0.00526282	0.686771	Q6DN90-2	IQ motif and SEC7 domain-containing protein 1	IQSEC1
0.00111235	0.686757	Q9UNW9	RNA-binding protein Nova-2	NOVA2
0.00127037	0.686464	Q14168-4	MAGUK p55 subfamily member 2	MPP2
0.00952044	0.684492	P28472-4	Gamma-aminobutyric acid receptor subunit beta-3	GABRB3
0.00156862	0.682912	Q7L099-3	Protein RUFY3	RUFY3
0.00306832	0.680446	P12036	Neurofilament heavy polypeptide	NEFH
0.00282867	0.678567	P52429	Diacylglycerol kinase epsilon	DGKE
3.65056e-05	0.675974	P05027	Sodium/potassium-transporting ATPase subunit beta-1	ATP1B1
0.00129037	0.675922	P32004-3	Neural cell adhesion molecule L1	L1CAM
0.000241516	0.67486	P13591-4	Neural cell adhesion molecule 1	NCAM1
3.59451e-05	0.67453	Q9UH03-2	Neuronal-specific septin-3	SEPT3
6.27362e-05	0.67293	Q14576-2	ELAV-like protein 3	ELAVL3
4.20812e-05	0.671886	P61266-2	Syntaxin-1B	STX1B
0.00352989	0.670969	Q35914	ATP synthase protein 8	MT-ATP8
0.00938892	0.669563	Q9UJ14	Gamma-glutamyltransferase 7;Gamma-glutamyltransferase 7 heavy chain;Gamma-glutamyltransferase 7 light chain	GGT7
0.000193614	0.669343	Q8NE35-2	Cytoplasmic polyadenylation element-binding protein 3;Cytoplasmic polyadenylation element-binding protein 2	CPEB3;CPEB2
0.000526891	0.668975	Q16799-3	Reticulon-1	RTN1
0.000646029	0.665838	P05937	Calbindin	CALB1
7.74395e-05	0.665768	Q96GD0	Pyridoxal phosphate phosphatase	PDXP	day 3
1.09606e-06	0.664188	P60880	Synaptosomal-associated protein 25	SNAP25	day 3
0.000218452	0.663696	Q9H7Z7	Prostaglandin E synthase 2;Prostaglandin E synthase 2 truncated form	PTGES2	day 3
6.97494e-05	0.662256	Q02156	Protein kinase C epsilon type	PRKCE
3.46626e-07	0.662249	O60641-4	Clathrin coat assembly protein AP180	SNAP91	day 3
0.00131262	0.659916	P60880-2	Synaptosomal-associated protein 25	SNAP25	day 3
0.00667109	0.659414	P43080	Guanylyl cyclase-activating protein 1	GUCA1A
0.000259784	0.658697	Q9C040	Tripartite motif-containing protein 2	TRIM2	day 3
0.00774337	0.658682	Q9ULD0	2-oxoglutarate dehydrogenase-like, mitochondrial	OGDHL
6.0204e-05	0.658153	O95563	Mitochondrial pyruvate carrier 2	MPC2	day 1
0.00221748	0.658114	O15303	Metabotropic glutamate receptor 6	GRM6
0.00160252	0.655863	P78357	Contactin-associated protein 1	CNTNAP1
0.000504631	0.654251	P03999	Short-wave-sensitive opsin 1	OPN1SW
0.000185364	0.654132	O95718	Steroid hormone receptor ERR2	ESRRB	day 3
0.00152064	0.65376	P28768	Superoxide dismutase [Mn], mitochondrial (Fragment)	SOD2
5.44021e-05	0.652629	P26232	Catenin alpha-2	CTNNA2
3.87188e-06	0.6525	Q05639	Elongation factor 1-alpha 2	EEF1A2
0.000300415	0.651497	O15020	Spectrin beta chain, non-erythrocytic 2	SPTBN2	day 3
0.000683012	0.650267	Q8N573-5	Oxidation resistance protein 1	OXR1
0.00025798	0.64635	O43236-5	Septin-4	SEPT4
0.00201887	0.644017	Q9NS69	Mitochondrial import receptor subunit TOM22 homolog	TOMM22
0.00707625	0.642262	Q9BXW6	Oxysterol-binding protein-related protein 1	OSBPL1A
0.00651227	0.640686	P20674	Cytochrome c oxidase subunit 5A, mitochondrial	COX5A
1.16231e-05	0.637642	P47870-1	Gamma-aminobutyric acid receptor subunit beta-2;Gamma-aminobutyric acid receptor subunit beta-1	GABRB2;GABRB1
9.17164e-09	0.636166	Q14194-2	Dihydropyrimidinase-related protein 1	CRMP1	day 3
0.000974611	0.63275	Q16720-8	Plasma membrane calcium-transporting ATPase 3	ATP2B3	day 1
0.00561392	0.632515	P13618	ATP synthase-coupling factor 6, mitochondrial	ATP5PF
1.84345e-05	0.630172	O75061	Putative tyrosine-protein phosphatase auxilin	DNAJC6
0.00193253	0.62892	O75251-2	NADH dehydrogenase [ubiquinone] iron-sulfur protein 7, mitochondrial	NDUFS7
8.14879e-06	0.628437	Q13449	Limbic system-associated membrane protein	LSAMP
0.000979271	0.628092	D2WKD8	Sodium/potassium-transporting ATPase subunit alpha-2	ATP1A2
0.000105149	0.626194	P61978	Heterogeneous nuclear ribonucleoprotein K	HNRNPK
1.82327e-07	0.623935	Q9UI15	Transgelin-3	TAGLN3	day 1+3
0.000458903	0.622104	Q96FJ2	Dynein light chain 2, cytoplasmic	DYNLL2
0.000892982	0.620444	P49758-12	Regulator of G-protein signaling 6	RGS6
9.25504e-05	0.620283	Q13367-4	AP-3 complex subunit beta-2	AP3B2
0.000122771	0.619383	P48319	Glutamate decarboxylase 1	GAD1
1.7915e-05	0.617731	O15537	Retinoschisin	RS1
2.20388e-06	0.616419	P62760	Visinin-like protein 1	VSNL1	day 3
0.00848652	0.613933	P63096	Guanine nucleotide-binding protein G(i) subunit alpha-1	GNAI1
0.000374634	0.612439	Q8WVH0	Complexin-3	CPLX3	day 1+3
0.000198323	0.611062	P51513	RNA-binding protein Nova-1	NOVA1
0.000634436	0.607027	Q9BWM7	Sideroflexin-3	SFXN3
0.00202605	0.604954	Q9Y6M7-4	Sodium bicarbonate cotransporter 3	SLC4A7
3.53818e-07	0.60373	O14531	Dihydropyrimidinase-related protein 4	DPYSL4
0.000329937	0.603482	Q96MM6	Heat shock 70 kDa protein 12B	HSPA12B
3.49607e-05	0.602664	P63027	Vesicle-associated membrane protein 2	VAMP2
0.000141189	0.601113	P26378-3	ELAV-like protein 4	ELAVL4	day 1+3
6.32226e-06	0.600971	P68366	Tubulin alpha-4A chain	TUBA4A
0.00671272	0.600281	Q9NZR1	Tropomodulin-2	TMOD2
0.000460289	0.599226	A8MT19	Putative rhophilin-2-like protein RHPN2P1;Rhophilin-2	RHPN2P1;RHPN2
4.7967e-09	0.595005	P17600	Synapsin-1	SYN1	day 3
4.88178e-05	0.594154	O15354	Prosaposin receptor GPR37	GPR37
0.00146921	0.593902	Q5TBA9	Protein furry homolog	FRY
0.00142655	0.592899	Q9Y2J0-2	Rabphilin-3A	RPH3A
0.00202506	0.585117	Q96QF0-8	Rab-3A-interacting protein	RAB3IP
2.01286e-06	0.584016	P22676	Calretinin	CALB2	day 1
4.08112e-06	0.58087	P04350	Tubulin beta-4A chain	TUBB4A
2.20195e-05	0.574482	Q8TDJ6-3	DmX-like protein 2	DMXL2
0.000920664	0.574471	Q12765-2	Secernin-1	SCRN1
8.49492e-05	0.57188	Q3I5G7	Alpha-synuclein	SNCA	day 1+3
0.00319714	0.571477	P47736	Rap1 GTPase-activating protein 1	RAP1GAP
0.000115564	0.569586	P24539	ATP synthase F(0) complex subunit B1, mitochondrial	ATP5F1
0.00649452	0.568551	Q5S3G4	Cytochrome c oxidase subunit 5B, mitochondrial	COX5B
2.84216e-06	0.565537	Q9H4G0	Band 4.1-like protein 1	EPB41L1	day 3
1.5603e-05	0.56269	Q8NCB2-3	CaM kinase-like vesicle-associated protein	CAMKV
0.000303369	0.561386	Q9Y2Z2-3	Protein MTO1 homolog, mitochondrial	MTO1
8.13318e-05	0.561178	Q9UK22	F-box only protein 2	FBXO2	day 3
1.35698e-07	0.557877	Q15700-3	Disks large homolog 2	DLG2	day 3
4.83143e-05	0.555282	Q12926	ELAV-like protein 2	ELAVL2	day 3
4.52253e-05	0.5548	P09497	Clathrin light chain B	CLTB
3.67091e-05	0.55209	A4Z6H0	Adenylosuccinate synthetase isozyme 1	ADSSL1
7.44008e-06	0.550341	Q8NFZ4	Neuroligin-2	NLGN2
0.000408095	0.549902	Q9Y4I1-2	Unconventional myosin-Va	MYO5A
0.000131686	0.549705	Q01814-4	Plasma membrane calcium-transporting ATPase 2	ATP2B2
1.76701e-06	0.549106	Q16143	Beta-synuclein	SNCB
0.000193307	0.547462	P48539	Purkinje cell protein 4	PCP4
0.000270587	0.536134	Q9Y4C0-3	Neurexin-3	NRXN3
0.000280605	0.536103	Q9P2U7-3	Vesicular glutamate transporter 1	SLC17A7
0.00880337	0.516583	P80928	Macrophage migration inhibitory factor	MIF
0.000327002	0.503776	Q6U841-2	Sodium-driven chloride bicarbonate exchanger	SLC4A10
8.64564e-05	0.501444	O14810	Complexin-1	CPLX1
9.45216e-05	0.498013	P29973	cGMP-gated cation channel alpha-1	CNGA1
9.80437e-07	0.493525	P48321	Glutamate decarboxylase 2	GAD2
6.76821e-06	0.480114	Q8WXD9	Caskin-1	CASKIN1
7.22322e-06	0.47655	Q6MZT1	Regulator of G-protein signaling 7-binding protein	RGS7BP
8.94497e-07	0.473383	Q12955	Ankyrin-3	ANK3	day 3
0.000370427	0.47143	Q9BQI5	SH3-containing GRB2-like protein 3-interacting protein 1	SGIP1
0.00040454	0.462662	P35219	Carbonic anhydrase-related protein	CA8
6.76241e-05	0.456443	P63211	Guanine nucleotide-binding protein G(T) subunit gamma-T1	GNGT1
4.51263e-09	0.446994	Q9UPP2	IQ motif and SEC7 domain-containing protein 3	IQSEC3
0.000554276	0.44618	Q9MYT8	ATP synthase subunit e, mitochondrial	ATP5ME
0.00246888	0.434917	Q9H598	Vesicular inhibitory amino acid transporter	SLC32A1	day3
0.00127365	0.432092	P59768	Guanine nucleotide-binding protein G(I)/G(S)/G(O) subunit gamma-2	GNG2
0.00867176	0.259647	O43678-2	NADH dehydrogenase [ubiquinone] 1 alpha subcomplex subunit 2	NDUFA2
0.00268969	0.244685	P17096	High mobility group protein HMG-I/HMG-Y	HMGA1
