# Supplementary material for: Large-Scale Protein Analysis of Experimental Retinal Artery Occlusion
Source: Int J Mol Sci. 2023 Apr 27;24(9):7919. doi: 10.3390/ijms24097919 (PMC10177937; doi:10.3390/ijms24097919)
Supplement: Supplementary file 1 [file ijms-24-07919-s001.zip › Table S7, Significant Reactome pathways, upregulated.xlsx]

## Sheet: Ark1
Pathway identifier	Pathway name	#Proteins found	#Total proteins in pathway	Protein ratio	pValue	FDR	Submitted proteins found
R-HSA-9010553	Regulation of expression of SLITs and ROBOs	24	172	0.0147424	1.25566e-12	9.06453e-10	Q07020;Q9UL46;P25398;P28066;P62906;P62829;P36578;P11940;O00231;Q06323;P51665;P62495;P42766;P62333;P50914;P62195;P62263;P62241;P25789;P46783;P62847;P60900;Q9HAU5;P62753
R-HSA-114608	Platelet degranulation	21	128	0.0109711	1.7365e-12	9.06453e-10	P08758;O43852;P37802;Q9UNF1;P18206;P11021;O43707;P00747;P23528;Q9NUQ9;P01009;P02647;P02679;P02787;P02765;P09486;P02675;P02751;P10909;Q9Y490;P21333
R-HSA-76005	Response to elevated platelet cytosolic Ca2+	21	133	0.0113997	3.52685e-12	9.40124e-10	P08758;O43852;P37802;Q9UNF1;P18206;P11021;O43707;P00747;P23528;Q9NUQ9;P01009;P02647;P02679;P02787;P02765;P09486;P02675;P02751;P10909;Q9Y490;P21333
R-HSA-72737	Cap-dependent Translation Initiation	20	120	0.0102854	4.51983e-12	9.40124e-10	Q07020;P25398;P62906;P62829;P11940;P36578;P42766;P50914;P62241;P62263;P55010;P46783;Q14152;Q9Y262;P20042;P62847;P05198;P60228;P62753;P60842
R-HSA-72613	Eukaryotic Translation Initiation	20	120	0.0102854	4.51983e-12	9.40124e-10	Q07020;P25398;P62906;P62829;P11940;P36578;P42766;P50914;P62241;P62263;P55010;P46783;Q14152;Q9Y262;P20042;P62847;P05198;P60228;P62753;P60842
R-HSA-156827	L13a-mediated translational silencing of Ceruloplasmin expression	19	112	0.00959973	1.16752e-11	1.921e-09	Q07020;P25398;P62906;P62829;P11940;P36578;P42766;P50914;P62241;P62263;P46783;Q14152;Q9Y262;P20042;P62847;P05198;P60228;P62753;P60842
R-HSA-72706	GTP hydrolysis and joining of the 60S ribosomal subunit	19	113	0.00968544	1.35595e-11	1.921e-09	Q07020;P25398;P62906;P62829;P36578;P42766;P50914;P62241;P62263;P55010;P46783;Q14152;Q9Y262;P20042;P62847;P05198;P60228;P62753;P60842
R-HSA-2262752	Cellular responses to stress	49	769	0.0659124	1.4777e-11	1.921e-09	Q14204;P30043;P10599;P51665;P62195;P02647;P04040;P46783;P49137;P69905;P62753;P07237;P40763;Q07020;O00231;P36578;Q13409;P11413;Q06210;Q9BUF5;P11021;P68104;P62241;P20042;P62847;P60900;P02511;P07203;P25398;P28066;Q06323;P42766;P62333;P50914;Q15084;P68871;P25789;P05198;P48506;Q9Y490;Q9UL46;P62829;P62906;P14625;Q06830;Q09028;P52907;Q04206;P62263
R-HSA-376176	Signaling by ROBO receptors	25	218	0.0186852	2.67595e-11	2.87702e-09	P25398;P28066;P11940;Q06323;P51665;P62495;P42766;P62333;P50914;P62195;P25789;P46783;P62753;Q07020;Q9UL46;P62906;P62829;P36578;O00231;P62263;P62241;P62847;Q13177;P60900;Q9HAU5
R-HSA-8953897	Cellular responses to stimuli	49	783	0.0671124	2.76636e-11	2.87702e-09	Q14204;P30043;P10599;P51665;P62195;P02647;P04040;P46783;P49137;P69905;P62753;P07237;P40763;Q07020;O00231;P36578;Q13409;P11413;Q06210;Q9BUF5;P11021;P68104;P62241;P20042;P62847;P60900;P02511;P07203;P25398;P28066;Q06323;P42766;P62333;P50914;Q15084;P68871;P25789;P05198;P48506;Q9Y490;Q9UL46;P62829;P62906;P14625;Q06830;Q09028;P52907;Q04206;P62263
R-HSA-72649	Translation initiation complex formation	13	59	0.005057	1.03064e-09	8.96654e-08	P25398;P11940;P62241;P62263;P46783;Q14152;Q9Y262;P20042;P62847;P05198;P60228;P62753;P60842
R-HSA-72702	Ribosomal scanning and start codon recognition	13	59	0.005057	1.03064e-09	8.96654e-08	P25398;P62241;P62263;P55010;P46783;Q14152;Q9Y262;P20042;P62847;P05198;P60228;P62753;P60842
R-HSA-72662	Activation of the mRNA upon binding of the cap-binding complex and eIFs, and subsequent binding to 43S	13	60	0.00514271	1.25789e-09	1.00632e-07	P25398;P11940;P62241;P62263;P46783;Q14152;Q9Y262;P20042;P62847;P05198;P60228;P62753;P60842
R-HSA-6798695	Neutrophil degranulation	34	480	0.0411417	2.19101e-09	1.5961e-07	Q14204;P50395;P02792;Q14764;Q13576;P06737;P28066;P11169;P51665;P30740;P09110;P68871;O15511;P04040;Q99829;P46940;P02765;P07355;P27105;P07339;P13639;O00231;Q7L576;P84095;P17931;P18206;O00161;P68104;P01009;P07384;P06396;P08236;P02794;P46976
R-HSA-422475	Axon guidance	37	558	0.0478272	2.31319e-09	1.5961e-07	P25398;P28066;O15143;P11940;Q06323;P51665;P35579;P15311;P62495;P42766;P62333;P50914;P62195;P35241;P23528;O15511;P25789;P46783;P26038;P62753;Q9Y490;Q07020;Q9UL46;P62906;P62829;P36578;O00231;P19105;Q9BUF5;P62263;P62241;P61158;P62847;Q96S59;Q13177;P60900;Q9HAU5
R-HSA-72766	Translation	26	294	0.0251993	2.4859e-09	1.61584e-07	P25398;P11940;O43776;P62495;P42766;P50914;P55010;P46783;Q14152;P05198;P62753;Q07020;P13639;P51571;P62906;P23381;P62829;P36578;P68104;P62263;P62241;Q9Y262;P20042;P62847;P60228;P60842
R-HSA-447115	Interleukin-12 family signaling	12	56	0.00479986	6.19028e-09	3.47368e-07	P42224;Q9UL46;P00915;P52907;P23528;P09661;Q13177;P26038;P13796;P07355;P07237;P40763
R-HSA-168249	Innate Immune System	58	1201	0.10294	6.2483e-09	3.47368e-07	P54578;Q14204;Q14764;P06737;P11169;P10599;P51665;P35579;P62195;P04040;O15511;P46940;P02765;P49137;P07355;P27105;P04004;P13639;O00231;P18206;P84095;O00161;P68104;P02679;Q15075;P61158;P06396;P60900;Q13177;P02675;P46976;P02794;P50395;P02792;Q13576;P28066;O15143;Q06323;P30740;P62333;P09110;P23528;P68871;Q99829;P25789;Q15366;Q9UL46;P07339;P14625;P35222;Q7L576;P17931;P52907;Q04206;P01009;P07384;P08236;…
R-HSA-392499	Metabolism of proteins	80	1950	0.167138	6.43275e-09	3.47368e-07	P54578;Q14204;Q92538;P04439;P18085;P10599;Q9HCB6;P51665;O75150;P00747;P62195;P02649;P02647;P46783;P02765;P62753;P07237;P40763;Q07020;P35606;P13639;O00231;P19022;P36578;Q13409;Q06210;Q9BUF5;P68104;P62241;P02679;P20042;P62847;P06396;P60900;P60228;P02751;P53621;P00450;P25398;P28066;O43852;Q8WVM8;P11940;Q06323;O43776;P10451;P30101;P62495;P42766;P17844;Q9Y4E8;P62333;P50914;Q9NZU5;Q15084;P25789;P55010;…
R-HSA-76002	Platelet activation, signaling and aggregation	24	265	0.0227136	6.73989e-09	3.50474e-07	P08758;O43852;P04899;P37802;Q9UNF1;P84095;P18206;P11021;O43707;P00747;P23528;Q9NUQ9;P01009;P02647;P02679;P02765;P02787;P09486;Q14344;P02675;P02751;P10909;Q9Y490;P21333
R-HSA-9675108	Nervous system development	37	584	0.0500557	7.63136e-09	3.73937e-07	P25398;P28066;O15143;P11940;Q06323;P51665;P35579;P15311;P62495;P42766;P62333;P50914;P62195;P35241;P23528;O15511;P25789;P46783;P26038;P62753;Q9Y490;Q07020;Q9UL46;P62906;P62829;P36578;O00231;P19105;Q9BUF5;P62263;P62241;P61158;P62847;Q96S59;Q13177;P60900;Q9HAU5
R-HSA-72689	Formation of a pool of free 40S subunits	15	102	0.00874261	1.17399e-08	5.51775e-07	Q07020;P25398;P62906;P62829;P36578;P42766;P50914;P62241;P62263;P46783;Q14152;Q9Y262;P62847;P60228;P62753
R-HSA-156902	Peptide chain elongation	14	90	0.00771407	1.82887e-08	8.2299e-07	Q07020;P25398;P13639;P62906;P62829;P36578;P42766;P50914;P68104;P62241;P62263;P46783;P62847;P62753
R-HSA-8957275	Post-translational protein phosphorylation	15	107	0.00917117	2.18556e-08	9.39296e-07	P00450;O43852;P14625;P19022;P10451;Q15084;P02649;P01009;P02647;P02679;P24821;P02787;P02765;P07237;P02751
R-HSA-381426	Regulation of Insulin-like Growth Factor (IGF) transport and uptake by Insulin-like Growth Factor Binding Proteins (IGFBPs)	16	124	0.0106283	2.29097e-08	9.39296e-07	P00450;O43852;P14625;P19022;P10451;P00747;Q15084;P02649;P01009;P02647;P02679;P24821;P02787;P02765;P07237;P02751
R-HSA-9711123	Cellular response to chemical stress	20	201	0.0172281	2.86586e-08	1.14634e-06	Q9UL46;P28066;Q06830;O00231;P10599;P30043;Q06323;P11413;P51665;P62333;P62195;P68871;P25789;P04040;P60900;P69905;P48506;P07237;P07203;P40763
R-HSA-72695	Formation of the ternary complex, and subsequently, the 43S complex	11	52	0.00445702	3.04118e-08	1.15565e-06	P25398;P62241;P62263;Q9Y262;P46783;Q14152;P20042;P05198;P62847;P60228;P62753
R-HSA-156842	Eukaryotic Translation Elongation	14	95	0.00814262	3.54092e-08	1.31014e-06	Q07020;P25398;P13639;P62906;P62829;P36578;P42766;P50914;P68104;P62241;P62263;P46783;P62847;P62753
R-HSA-975956	Nonsense Mediated Decay (NMD) independent of the Exon Junction Complex (EJC)	14	96	0.00822834	4.02182e-08	1.44786e-06	Q07020;P25398;P62906;P62829;P11940;P36578;P62495;P42766;P50914;P62241;P62263;P46783;P62847;P62753
R-HSA-927802	Nonsense-Mediated Decay (NMD)	15	117	0.0100283	6.88487e-08	2.27201e-06	Q07020;P25398;P62906;P62829;P11940;P36578;P62495;P42766;P50914;P62241;P62263;P46783;P62847;Q9HAU5;P62753
R-HSA-975957	Nonsense Mediated Decay (NMD) enhanced by the Exon Junction Complex (EJC)	15	117	0.0100283	6.88487e-08	2.27201e-06	Q07020;P25398;P62906;P62829;P11940;P36578;P62495;P42766;P50914;P62241;P62263;P46783;P62847;Q9HAU5;P62753
R-HSA-9633012	Response of EIF2AK4 (GCN2) to amino acid deficiency	14	102	0.00874261	8.3729e-08	2.67933e-06	Q07020;P25398;P62906;P62829;P36578;P42766;P50914;P62241;P62263;P46783;P20042;P62847;P05198;P62753
R-HSA-9020591	Interleukin-12 signaling	10	46	0.00394274	1.01253e-07	3.13886e-06	Q9UL46;P00915;P52907;P23528;P09661;Q13177;P13796;P26038;P07355;P07237
R-HSA-8950505	Gene and protein expression by JAK-STAT signaling after Interleukin-12 stimulation	9	37	0.00317134	1.754e-07	5.26199e-06	Q9UL46;P00915;P52907;P23528;P09661;Q13177;P13796;P26038;P07355
R-HSA-211733	Regulation of activated PAK-2p34 by proteasome mediated degradation	10	50	0.00428559	2.16031e-07	6.26489e-06	Q9UL46;P62333;P28066;P62195;P25789;O00231;Q06323;Q13177;P60900;P51665
R-HSA-72764	Eukaryotic Translation Termination	13	94	0.00805691	2.24173e-07	6.4817e-06	Q07020;P25398;P62906;P62829;P36578;P62495;P42766;P50914;P62241;P62263;P46783;P62847;P62753
R-HSA-168256	Immune System	84	2265	0.194137	2.31489e-07	6.4817e-06	P52630;P54578;Q14204;Q14764;Q5GLZ8;P06737;P04439;P55265;P11169;P10599;P51665;P35579;P42224;P62195;P04083;P04040;O15511;P20592;P46940;P02765;P49137;P21127;P07355;P07237;P40763;P27105;P04004;P13639;O00231;Q13409;P13796;P18206;P84095;Q9BUF5;P11021;O00161;P68104;P02679;P09661;Q15075;P61158;P06396;P60900;Q13177;P02675;P02751;P46976;P21333;P02794;P50395;P02792;Q13576;P28066;O15143;O75369;Q06323;P30101;…
R-HSA-9759194	Nuclear events mediated by NFE2L2	12	79	0.00677124	2.47477e-07	6.68188e-06	Q9UL46;P62333;P28066;P62195;P25789;Q06830;O00231;Q06323;P11413;P60900;P51665;P48506
R-HSA-169911	Regulation of Apoptosis	10	53	0.00454273	3.65445e-07	9.50156e-06	Q9UL46;P62333;P28066;P62195;P25789;O00231;Q06323;Q13177;P60900;P51665
R-HSA-1169091	Activation of NF-kappaB in B cells	11	67	0.00574269	3.71056e-07	9.64746e-06	Q9UL46;P62333;P28066;P62195;Q04206;P25789;O00231;Q06323;P60900;P51665;P21127
R-HSA-450408	AUF1 (hnRNP D0) binds and destabilizes mRNA	10	56	0.00479986	5.98685e-07	1.49671e-05	Q9UL46;P62333;P28066;P62195;P25789;O00231;P11940;Q06323;P60900;P51665
R-HSA-449147	Signaling by Interleukins	29	470	0.0402846	6.30243e-07	1.51258e-05	P54578;P52630;P28066;Q06323;P51665;P42224;P62333;P62195;P23528;P04083;P25789;P49137;P26038;P07355;P07237;P40763;Q9UL46;P14625;O00231;P13796;P00915;P52907;P08670;Q04206;P09661;Q13177;P60900;P02751
R-HSA-5607761	Dectin-1 mediated noncanonical NF-kB signaling	10	60	0.00514271	1.10624e-06	2.65499e-05	Q9UL46;P62333;P28066;P62195;Q04206;P25789;O00231;Q06323;P60900;P51665
R-HSA-2408557	Selenocysteine synthesis	12	94	0.00805691	1.49567e-06	3.44005e-05	Q07020;P42766;P25398;P50914;P62906;P62829;P62241;P62263;P36578;P46783;P62847;P62753
R-HSA-1799339	SRP-dependent cotranslational protein targeting to membrane	13	113	0.00968544	1.70435e-06	3.92001e-05	Q07020;P25398;P51571;P62906;P62829;P36578;P42766;P50914;P62241;P62263;P46783;P62847;P62753
R-HSA-8852276	The role of GTSE1 in G2/M progression after G2 checkpoint	11	79	0.00677124	1.80766e-06	3.97685e-05	Q9BUF5;Q9UL46;P62333;P28066;P62195;P25789;O00231;Q15691;Q06323;P60900;P51665
R-HSA-8878159	Transcriptional regulation by RUNX3	12	96	0.00822834	1.85327e-06	4.07719e-05	Q9UL46;SMAD4;P62333;P28066;P62195;P25789;O00231;Q06323;P35222;P60900;P51665;P10451
R-HSA-1236978	Cross-presentation of soluble exogenous antigens (endosomes)	9	50	0.00428559	2.06253e-06	4.33132e-05	Q9UL46;P62333;P28066;P62195;P25789;O00231;Q06323;P60900;P51665
R-HSA-5358346	Hedgehog ligand biogenesis	10	65	0.00557127	2.2401e-06	4.70422e-05	Q9UL46;P62333;P28066;P62195;P25789;O00231;Q06323;P60900;P51665;P07237
R-HSA-350562	Regulation of ornithine decarboxylase (ODC)	9	51	0.0043713	2.41888e-06	4.80592e-05	Q9UL46;P62333;P28066;P62195;P25789;O00231;Q06323;P60900;P51665
R-HSA-69580	p53-Dependent G1/S DNA damage checkpoint	10	66	0.00565698	2.56057e-06	4.80592e-05	Q9UL46;P62333;P28066;P62195;P25789;O00231;Q06323;P60900;P51665;P57723
R-HSA-69563	p53-Dependent G1 DNA Damage Response	10	66	0.00565698	2.56057e-06	4.80592e-05	Q9UL46;P62333;P28066;P62195;P25789;O00231;Q06323;P60900;P51665;P57723
R-HSA-1168372	Downstream signaling events of B Cell Receptor (BCR)	11	82	0.00702837	2.5724e-06	4.80592e-05	Q9UL46;P62333;P28066;P62195;Q04206;P25789;O00231;Q06323;P60900;P51665;P21127
R-HSA-9762114	GSK3B and BTRC:CUL1-mediated-degradation of NFE2L2	9	52	0.00445702	2.82701e-06	4.80592e-05	Q9UL46;P62333;P28066;P62195;P25789;O00231;Q06323;P60900;P51665
R-HSA-69601	Ubiquitin Mediated Degradation of Phosphorylated Cdc25A	9	52	0.00445702	2.82701e-06	4.80592e-05	Q9UL46;P62333;P28066;P62195;P25789;O00231;Q06323;P60900;P51665
R-HSA-69610	p53-Independent DNA Damage Response	9	52	0.00445702	2.82701e-06	4.80592e-05	Q9UL46;P62333;P28066;P62195;P25789;O00231;Q06323;P60900;P51665
R-HSA-69613	p53-Independent G1/S DNA damage checkpoint	9	52	0.00445702	2.82701e-06	4.80592e-05	Q9UL46;P62333;P28066;P62195;P25789;O00231;Q06323;P60900;P51665
R-HSA-349425	Autodegradation of the E3 ubiquitin ligase COP1	9	52	0.00445702	2.82701e-06	4.80592e-05	Q9UL46;P62333;P28066;P62195;P25789;O00231;Q06323;P60900;P51665
R-HSA-75815	Ubiquitin-dependent degradation of Cyclin D	9	52	0.00445702	2.82701e-06	4.80592e-05	Q9UL46;P62333;P28066;P62195;P25789;O00231;Q06323;P60900;P51665
R-HSA-192823	Viral mRNA Translation	12	101	0.0086569	3.09746e-06	5.26568e-05	Q07020;P42766;P25398;P50914;P62906;P62829;P62241;P62263;P36578;P46783;P62847;P62753
R-HSA-180534	Vpu mediated degradation of CD4	9	53	0.00454273	3.29303e-06	5.31658e-05	Q9UL46;P62333;P28066;P62195;P25789;O00231;Q06323;P60900;P51665
R-HSA-69615	G1/S DNA Damage Checkpoints	10	68	0.0058284	3.32287e-06	5.31658e-05	Q9UL46;P62333;P28066;P62195;P25789;O00231;Q06323;P60900;P51665;P57723
R-HSA-5663202	Diseases of signal transduction by growth factor receptors and second messengers	27	457	0.0391703	3.50395e-06	5.60632e-05	P28066;Q06323;P51665;P35579;Q96PU8;P42224;P62333;P62195;P25789;P46940;Q6UN15;Q92614;P26038;P62753;Q9Y490;P40763;Q9UL46;SMAD4;O00231;P35222;P84095;P18206;P02679;P60900;P02675;P02751
R-HSA-382556	ABC-family proteins mediated transport	12	103	0.00882832	3.77212e-06	6.03539e-05	Q9UL46;P62333;P28066;P62195;P25789;P02647;O00231;P20042;Q06323;P05198;P60900;P51665
R-HSA-8854050	FBXL7 down-regulates AURKA during mitotic entry and in early mitosis	9	55	0.00471415	4.42599e-06	6.63899e-05	Q9UL46;P62333;P28066;P62195;P25789;O00231;Q06323;P60900;P51665
R-HSA-174113	SCF-beta-TrCP mediated degradation of Emi1	9	55	0.00471415	4.42599e-06	6.63899e-05	Q9UL46;P62333;P28066;P62195;P25789;O00231;Q06323;P60900;P51665
R-HSA-4641257	Degradation of AXIN	9	55	0.00471415	4.42599e-06	6.63899e-05	Q9UL46;P62333;P28066;P62195;P25789;O00231;Q06323;P60900;P51665
R-HSA-9604323	Negative regulation of NOTCH4 signaling	9	55	0.00471415	4.42599e-06	6.63899e-05	Q9UL46;P62333;P28066;P62195;P25789;O00231;Q06323;P60900;P51665
R-HSA-8941858	Regulation of RUNX3 expression and activity	9	55	0.00471415	4.42599e-06	6.63899e-05	Q9UL46;P62333;P28066;P62195;P25789;O00231;Q06323;P60900;P51665
R-HSA-450531	Regulation of mRNA stability by proteins that bind AU-rich elements	11	88	0.00754264	4.98941e-06	6.98518e-05	Q9UL46;P62333;P28066;P62195;P25789;O00231;P11940;Q06323;P49137;P60900;P51665
R-HSA-180585	Vif-mediated degradation of APOBEC3G	9	56	0.00479986	5.10808e-06	7.15131e-05	Q9UL46;P62333;P28066;P62195;P25789;O00231;Q06323;P60900;P51665
R-HSA-5362768	Hh mutants are degraded by ERAD	9	56	0.00479986	5.10808e-06	7.15131e-05	Q9UL46;P62333;P28066;P62195;P25789;O00231;Q06323;P60900;P51665
R-HSA-4641258	Degradation of DVL	9	57	0.00488557	5.8784e-06	7.87142e-05	Q9UL46;P62333;P28066;P62195;P25789;O00231;Q06323;P60900;P51665
R-HSA-69541	Stabilization of p53	9	57	0.00488557	5.8784e-06	7.87142e-05	Q9UL46;P62333;P28066;P62195;P25789;O00231;Q06323;P60900;P51665
R-HSA-9755511	KEAP1-NFE2L2 pathway	12	108	0.00925688	6.05494e-06	7.87142e-05	Q9UL46;P62333;P28066;P62195;P25789;Q06830;O00231;Q06323;P11413;P60900;P51665;P48506
R-HSA-8939902	Regulation of RUNX2 expression and activity	10	74	0.00634268	6.90789e-06	8.98026e-05	P42224;Q9UL46;P62333;P28066;P62195;P25789;O00231;Q06323;P60900;P51665
R-HSA-445355	Smooth Muscle Contraction	8	44	0.00377132	7.11756e-06	9.25283e-05	P18206;Q9BX66;P04083;P09493;Q13177;P07355;P19105;Q9Y490
R-HSA-5357801	Programmed Cell Death	17	216	0.0185138	7.26543e-06	9.26571e-05	Q15149;Q9UL46;O75955;P28066;O00231;Q06323;P35222;P51665;P62333;P62195;P08670;P25789;P06396;Q13177;P60900;Q14254;P40763
R-HSA-5387390	Hh mutants abrogate ligand secretion	9	59	0.005057	7.72143e-06	9.26571e-05	Q9UL46;P62333;P28066;P62195;P25789;O00231;Q06323;P60900;P51665
R-HSA-5676590	NIK-->noncanonical NF-kB signaling	9	59	0.005057	7.72143e-06	9.26571e-05	Q9UL46;P62333;P28066;P62195;P25789;O00231;Q06323;P60900;P51665
R-HSA-351202	Metabolism of polyamines	9	59	0.005057	7.72143e-06	9.26571e-05	Q9UL46;P62333;P28066;P62195;P25789;O00231;Q06323;P60900;P51665
R-HSA-5610780	Degradation of GLI1 by the proteasome	9	60	0.00514271	8.81485e-06	0.000105778	Q9UL46;P62333;P28066;P62195;P25789;O00231;Q06323;P60900;P51665
R-HSA-5610783	Degradation of GLI2 by the proteasome	9	60	0.00514271	8.81485e-06	0.000105778	Q9UL46;P62333;P28066;P62195;P25789;O00231;Q06323;P60900;P51665
R-HSA-5610785	GLI3 is processed to GLI3R by the proteasome	9	60	0.00514271	8.81485e-06	0.000105778	Q9UL46;P62333;P28066;P62195;P25789;O00231;Q06323;P60900;P51665
R-HSA-187577	SCF(Skp2)-mediated degradation of p27/p21	9	60	0.00514271	8.81485e-06	0.000105778	Q9UL46;P62333;P28066;P62195;P25789;O00231;Q06323;P60900;P51665
R-HSA-5678895	Defective CFTR causes cystic fibrosis	9	61	0.00522842	1.0038e-05	0.00011925	Q9UL46;P62333;P28066;P62195;P25789;O00231;Q06323;P60900;P51665
R-HSA-5619084	ABC transporter disorders	10	78	0.00668552	1.08409e-05	0.00011925	Q9UL46;P62333;P28066;P62195;P25789;O00231;P02647;Q06323;P60900;P51665
R-HSA-9711097	Cellular response to starvation	14	157	0.0134568	1.21854e-05	0.000134039	Q07020;P25398;P62906;P62829;P36578;P42766;P50914;P62241;P62263;P46783;P20042;P62847;P05198;P62753
R-HSA-2408522	Selenoamino acid metabolism	12	118	0.010114	1.44753e-05	0.000159228	Q07020;P42766;P25398;P50914;P62906;P62829;P62241;P62263;P36578;P46783;P62847;P62753
R-HSA-174084	Autodegradation of Cdh1 by Cdh1:APC/C	9	64	0.00548556	1.46144e-05	0.000160759	Q9UL46;P62333;P28066;P62195;P25789;O00231;Q06323;P60900;P51665
R-HSA-4608870	Asymmetric localization of PCP proteins	9	64	0.00548556	1.46144e-05	0.000160759	Q9UL46;P62333;P28066;P62195;P25789;O00231;Q06323;P60900;P51665
R-HSA-109581	Apoptosis	15	182	0.0155996	1.48808e-05	0.000163689	Q15149;Q9UL46;P28066;O00231;Q06323;P35222;P51665;P62333;P62195;P08670;P25789;P06396;Q13177;P60900;P40763
R-HSA-1236974	ER-Phagosome pathway	14	160	0.0137139	1.49936e-05	0.00016493	Q9UL46;P28066;P04439;O00231;Q06323;P51665;P30101;P62333;O00161;P62195;P25789;P02679;P60900;P02675
R-HSA-195253	Degradation of beta-catenin by the destruction complex	10	83	0.00711408	1.83563e-05	0.000183563	Q9UL46;P62333;P28066;P62195;P25789;O00231;P35222;Q06323;P60900;P51665
R-HSA-69202	Cyclin E associated events during G1/S transition	10	83	0.00711408	1.83563e-05	0.000183563	Q9UL46;P62333;P28066;P62195;P25789;O00231;Q09028;Q06323;P60900;P51665
R-HSA-8878166	Transcriptional regulation by RUNX2	12	121	0.0103711	1.84751e-05	0.000184751	P42224;P17931;Q9UL46;SMAD4;P62333;P28066;P62195;P25789;O00231;Q06323;P60900;P51665
R-HSA-1234176	Oxygen-dependent proline hydroxylation of Hypoxia-inducible Factor Alpha	9	66	0.00565698	1.8566e-05	0.00018566	Q9UL46;P62333;P28066;P62195;P25789;O00231;Q06323;P60900;P51665
R-HSA-8953854	Metabolism of RNA	34	719	0.0616268	2.1155e-05	0.00021155	P25398;P28066;P55265;Q86V81;P11940;Q06323;P51665;Q9Y6M1;P62495;P42766;P17844;P62333;P50914;P62195;P25789;P46783;P49137;Q6UN15;P26599;Q15366;P62753;Q07020;Q9UL46;P62906;P62829;P36578;O00231;P62263;P62241;P09661;P62847;P60900;Q9HAU5;P60842
R-HSA-69656	Cyclin A:Cdk2-associated events at S phase entry	10	85	0.00728551	2.24261e-05	0.000224261	Q9UL46;P62333;P28066;P62195;P25789;O00231;Q09028;Q06323;P60900;P51665
R-HSA-174154	APC/C:Cdc20 mediated degradation of Securin	9	68	0.0058284	2.33922e-05	0.000233922	Q9UL46;P62333;P28066;P62195;P25789;O00231;Q06323;P60900;P51665
R-HSA-1280215	Cytokine Signaling in Immune system	37	821	0.0703694	2.48871e-05	0.000248871	P54578;P52630;P28066;P55265;P04439;O75369;Q06323;P51665;P42224;P62333;P62195;P23528;P04083;P25789;P20592;P49137;P26038;P07355;P07237;P40763;Q9UL46;P20591;P14625;O00231;P13796;P00915;P52907;P08670;Q04206;P09661;Q13177;P60900;P02751;P60842;P21333
R-HSA-5658442	Regulation of RAS by GAPs	9	69	0.00591412	2.61799e-05	0.000261799	Q9UL46;P62333;P28066;P62195;P25789;O00231;Q06323;P60900;P51665
R-HSA-8948751	Regulation of PTEN stability and activity	9	69	0.00591412	2.61799e-05	0.000261799	Q9UL46;P62333;P28066;P62195;P25789;O00231;Q06323;P60900;P51665
R-HSA-1266738	Developmental Biology	46	1134	0.0971972	3.22002e-05	0.000289802	P25398;P28066;O15143;P11940;Q06323;P51665;P35579;P15311;P62495;P42766;P62333;P35221;P50914;P62195;P23528;P35241;P25789;O15511;P46783;P26038;P62753;P40763;Q9Y490;Q07020;Q9UL46;SMAD4;P62829;P62906;O00231;P19022;P36578;P35222;Q09028;P19105;Q9BUF5;P41222;Q04206;P62263;P62241;P07384;P61158;P62847;P60900;Q13177;Q9HAU5;Q96S59
R-HSA-5663205	Infectious disease	52	1345	0.115282	3.23527e-05	0.000291174	P06733;P52630;Q14204;P04439;P10599;P51665;P35579;P42224;P62195;Q13283;O15511;P46783;P62753;Q07020;P13639;O00231;P36578;Q13409;Q9BUF5;P68104;Q99873;P62241;P61158;P62847;P60900;Q13177;P25398;P28066;P04899;O15143;Q06323;P42766;P17844;P62333;P50914;P25789;Q15366;Q9UL46;SMAD4;P62829;P62906;P35222;Q09028;O75351;Q7L576;O00410;O60716;Q00403;Q04206;P62263
R-HSA-68949	Orc1 removal from chromatin	9	71	0.00608554	3.26082e-05	0.000293474	Q9UL46;P62333;P28066;P62195;P25789;O00231;Q06323;P60900;P51665
R-HSA-5687128	MAPK6/MAPK4 signaling	10	89	0.00762835	3.29306e-05	0.000296376	Q9UL46;P62333;P28066;P62195;P25789;O00231;Q06323;Q13177;P60900;P51665
R-HSA-71291	Metabolism of amino acids and derivatives	22	376	0.0322277	3.37597e-05	0.000303837	Q07020;Q9UL46;P25398;P28066;P62906;P62829;O00231;P36578;Q06323;P51665;P42766;P62333;P50914;P62195;P62241;P62263;P25789;P46783;P62847;P60900;P62753;Q04609
R-HSA-9735869	SARS-CoV-1 modulates host translation machinery	7	40	0.00342847	3.39928e-05	0.000305935	P25398;P68104;P62241;P62263;P46783;P62847;P62753
R-HSA-1643685	Disease	74	2169	0.185909	3.48423e-05	0.000313581	P06733;P52630;Q14204;P04439;P10599;Q9HCB6;P51665;P35579;Q96PU8;P42224;P62195;P02647;Q13283;O15511;P46783;P46940;Q92614;P62753;P40763;Q07020;P13639;O00231;P36578;Q13409;Q06210;P18206;P84095;Q9BUF5;P68104;Q99873;P62241;P02679;P61158;P62847;P60900;Q13177;P02675;P02751;P46976;P00450;P25398;P00492;P28066;P04899;O15143;Q06323;P42766;P17844;P62333;P50914;P25789;Q6UN15;P26038;P48506;Q15366;Q9Y490;Q9UL46;…
R-HSA-9692914	SARS-CoV-1-host interactions	11	109	0.00934259	3.5229e-05	0.000317061	P25398;SMAD4;P62333;P68104;Q04206;P62241;P62263;P46783;P62847;Q15366;P62753
R-HSA-168273	Influenza Viral RNA Transcription and Replication	13	152	0.0130282	3.81009e-05	0.00032261	Q07020;P25398;P62906;P62829;P36578;O00410;P42766;P50914;P62241;P62263;P46783;P62847;P62753
R-HSA-69275	G2/M Transition	15	198	0.0169709	3.87182e-05	0.00032261	Q14204;Q9UL46;P28066;O00231;Q13409;Q09028;Q06323;P51665;Q9BUF5;P62333;P62195;P25789;Q15691;P21127;P60900
R-HSA-174184	Cdc20:Phospho-APC/C mediated degradation of Cyclin A	9	73	0.00625696	4.03263e-05	0.00032261	Q9UL46;P62333;P28066;P62195;P25789;O00231;Q06323;P60900;P51665
R-HSA-69017	CDK-mediated phosphorylation and removal of Cdc6	9	73	0.00625696	4.03263e-05	0.00032261	Q9UL46;P62333;P28066;P62195;P25789;O00231;Q06323;P60900;P51665
R-HSA-1236975	Antigen processing-Cross presentation	14	176	0.0150853	4.18831e-05	0.000335065	Q9UL46;P28066;P04439;O00231;Q06323;P51665;P30101;P62333;O00161;P62195;P25789;P02679;P60900;P02675
R-HSA-453274	Mitotic G2-G2/M phases	15	200	0.0171424	4.33202e-05	0.000346562	Q14204;Q9UL46;P28066;O00231;Q13409;Q09028;Q06323;P51665;Q9BUF5;P62333;P62195;P25789;Q15691;P21127;P60900
R-HSA-174178	APC/C:Cdh1 mediated degradation of Cdc20 and other APC/C:Cdh1 targeted proteins in late mitosis/early G1	9	74	0.00634268	4.47312e-05	0.000357849	Q9UL46;P62333;P28066;P62195;P25789;O00231;Q06323;P60900;P51665
R-HSA-179419	APC:Cdc20 mediated degradation of cell cycle proteins prior to satisfation of the cell cycle checkpoint	9	74	0.00634268	4.47312e-05	0.000357849	Q9UL46;P62333;P28066;P62195;P25789;O00231;Q06323;P60900;P51665
R-HSA-176409	APC/C:Cdc20 mediated degradation of mitotic proteins	9	76	0.0065141	5.47691e-05	0.000438153	Q9UL46;P62333;P28066;P62195;P25789;O00231;Q06323;P60900;P51665
R-HSA-1234174	Cellular response to hypoxia	9	76	0.0065141	5.47691e-05	0.000438153	Q9UL46;P62333;P28066;P62195;P25789;O00231;Q06323;P60900;P51665
R-HSA-9020702	Interleukin-1 signaling	11	115	0.00985686	5.66727e-05	0.000453381	P54578;Q9UL46;P62333;P28066;P62195;Q04206;P25789;O00231;Q06323;P60900;P51665
R-HSA-176814	Activation of APC/C and APC/C:Cdc20 mediated degradation of mitotic proteins	9	77	0.00659981	6.04612e-05	0.000483689	Q9UL46;P62333;P28066;P62195;P25789;O00231;Q06323;P60900;P51665
R-HSA-5689603	UCH proteinases	10	96	0.00822834	6.15094e-05	0.000492075	Q9UL46;P62333;Q9Y4E8;P28066;P62195;P25789;O00231;Q06323;P60900;P51665
R-HSA-3000480	Scavenging by Class A Receptors	5	19	0.00162852	7.05737e-05	0.00056459	P02792;P02649;P14625;P02647;P02794
R-HSA-5607764	CLEC7A (Dectin-1) signaling	10	98	0.00839976	7.27913e-05	0.000582331	Q9UL46;P62333;P28066;P62195;Q04206;P25789;O00231;Q06323;P60900;P51665
R-HSA-176408	Regulation of APC/C activators between G1/S and early anaphase	9	81	0.00694266	8.84759e-05	0.000707807	Q9UL46;P62333;P28066;P62195;P25789;O00231;Q06323;P60900;P51665
R-HSA-9013694	Signaling by NOTCH4	9	83	0.00711408	0.000106138	0.000742966	Q9UL46;P62333;P28066;P62195;P25789;O00231;Q06323;P60900;P51665
R-HSA-5632684	Hedgehog 'on' state	9	85	0.00728551	0.000126664	0.000886646	Q9UL46;P62333;P28066;P62195;P25789;O00231;Q06323;P60900;P51665
R-HSA-168255	Influenza Infection	13	172	0.0147424	0.000129633	0.000907432	Q07020;P25398;P62906;P62829;P36578;O00410;P42766;P50914;P62241;P62263;P46783;P62847;P62753
R-HSA-174143	APC/C-mediated degradation of cell cycle proteins	9	88	0.00754264	0.000163609	0.00114526	Q9UL46;P62333;P28066;P62195;P25789;O00231;Q06323;P60900;P51665
R-HSA-453276	Regulation of mitotic cell cycle	9	88	0.00754264	0.000163609	0.00114526	Q9UL46;P62333;P28066;P62195;P25789;O00231;Q06323;P60900;P51665
R-HSA-69206	G1/S Transition	11	131	0.0112283	0.000175313	0.00122719	Q9UL46;P62333;P28066;P62195;P25789;O00231;Q09028;Q06323;P60900;P51665;P12004
R-HSA-9678108	SARS-CoV-1 Infection	12	154	0.0131996	0.000177885	0.00124519	P17844;P25398;SMAD4;P62333;P68104;Q04206;P62241;P62263;P46783;P62847;Q15366;P62753
R-HSA-6802948	Signaling by high-kinase activity BRAF mutants	6	37	0.00317134	0.000186828	0.00130779	P18206;P02679;P46940;P02675;P02751;Q9Y490
R-HSA-446652	Interleukin-1 family signaling	12	155	0.0132853	0.000188626	0.00132038	P54578;Q9UL46;P62333;P28066;P62195;Q04206;P25789;O00231;Q06323;P60900;P51665;P40763
R-HSA-69052	Switching of origins to a post-replicative state	9	92	0.00788549	0.000226473	0.00158531	Q9UL46;P62333;P28066;P62195;P25789;O00231;Q06323;P60900;P51665
R-HSA-4086400	PCP/CE pathway	9	92	0.00788549	0.000226473	0.00158531	Q9UL46;P62333;P28066;P62195;P25789;O00231;Q06323;P60900;P51665
R-HSA-5610787	Hedgehog 'off' state	10	114	0.00977115	0.000244204	0.00170943	Q9BUF5;Q9UL46;P62333;P28066;P62195;P25789;O00231;Q06323;P60900;P51665
R-HSA-202403	TCR signaling	11	138	0.0118282	0.000272198	0.00190539	Q9UL46;P62333;P28066;P62195;Q04206;P25789;O00231;Q06323;Q13177;P60900;P51665
R-HSA-202424	Downstream TCR signaling	10	116	0.00994257	0.000279844	0.00195891	Q9UL46;P62333;P28066;P62195;Q04206;P25789;O00231;Q06323;P60900;P51665
R-HSA-195258	RHO GTPase Effectors	17	295	0.025285	0.000317248	0.00218172	Q14204;Q13576;O15143;Q13409;P35222;Q7L576;P35579;P84095;Q9BUF5;P35221;P23528;O15511;P61158;P46940;Q15691;Q13177;P21333
R-HSA-5674135	MAP2K and MAPK activation	6	41	0.00351419	0.000321789	0.00218172	P18206;P02679;P46940;P02675;P02751;Q9Y490
R-HSA-2467813	Separation of Sister Chromatids	13	191	0.016371	0.000352129	0.00218172	Q14204;Q9UL46;P28066;O00231;Q13409;Q06323;P51665;Q9BUF5;P62333;P62195;P25789;Q15691;P60900
R-HSA-372708	p130Cas linkage to MAPK signaling for integrins	4	15	0.00128568	0.00036362	0.00218172	P02679;P02675;P02751;Q9Y490
R-HSA-354194	GRB2:SOS provides linkage to MAPK signaling for Integrins	4	15	0.00128568	0.00036362	0.00218172	P02679;P02675;P02751;Q9Y490
R-HSA-9656223	Signaling by RAF1 mutants	6	42	0.0035999	0.0003652	0.0021912	P18206;P02679;P46940;P02675;P02751;Q9Y490
R-HSA-8939236	RUNX1 regulates transcription of genes involved in differentiation of HSCs	9	99	0.00848547	0.00038438	0.00230628	Q9UL46;P62333;P28066;P62195;P25789;O00231;Q06323;P60900;P51665
R-HSA-69239	Synthesis of DNA	10	121	0.0103711	0.000388411	0.00233047	Q9UL46;P62333;P28066;P62195;P25789;O00231;Q06323;P60900;P51665;P12004
R-HSA-194315	Signaling by Rho GTPases	29	678	0.0581126	0.000471164	0.00282698	Q14204;Q13576;O15143;Q8WVM8;Q6NZI2;P35579;Q9UEY8;P35221;P23528;O15511;Q9NZM3;P46940;Q14254;P27105;P52565;O75955;Q13409;P35222;Q7L576;Q07960;P84095;Q9BUF5;O00161;P08670;Q15691;P61158;Q13177;Q14344;P21333
R-HSA-5668541	TNFR2 non-canonical NF-kB pathway	9	102	0.00874261	0.000475433	0.0028526	Q9UL46;P62333;P28066;P62195;P25789;O00231;Q06323;P60900;P51665
R-HSA-453279	Mitotic G1 phase and G1/S transition	11	149	0.0127711	0.000513841	0.00308305	Q9UL46;P62333;P28066;P62195;P25789;O00231;Q09028;Q06323;P60900;P51665;P12004
R-HSA-5358351	Signaling by Hedgehog	11	150	0.0128568	0.000542711	0.00325627	Q9BUF5;Q9UL46;P62333;P28066;P62195;P25789;O00231;Q06323;P60900;P51665;P07237
R-HSA-9649948	Signaling downstream of RAS mutants	6	47	0.00402846	0.000655388	0.00393233	P18206;P02679;P46940;P02675;P02751;Q9Y490
R-HSA-6802946	Signaling by moderate kinase activity BRAF mutants	6	47	0.00402846	0.000655388	0.00393233	P18206;P02679;P46940;P02675;P02751;Q9Y490
R-HSA-6802955	Paradoxical activation of RAF signaling by kinase inactive BRAF	6	47	0.00402846	0.000655388	0.00393233	P18206;P02679;P46940;P02675;P02751;Q9Y490
R-HSA-6802949	Signaling by RAS mutants	6	47	0.00402846	0.000655388	0.00393233	P18206;P02679;P46940;P02675;P02751;Q9Y490
R-HSA-9716542	Signaling by Rho GTPases, Miro GTPases and RHOBTB3	29	694	0.059484	0.000680109	0.00408066	Q14204;Q13576;O15143;Q8WVM8;Q6NZI2;P35579;Q9UEY8;P35221;P23528;O15511;Q9NZM3;P46940;Q14254;P27105;P52565;O75955;Q13409;P35222;Q7L576;Q07960;P84095;Q9BUF5;O00161;P08670;Q15691;P61158;Q13177;Q14344;P21333
R-HSA-5653656	Vesicle-mediated transport	31	762	0.0653124	0.000685966	0.0041158	Q14204;P50395;P53621;P02792;Q92538;P18085;Q8WVM8;P54619;P35579;P02649;P68871;O15511;P02647;Q9NZM3;P02787;P69905;P35606;P14625;Q13409;O75351;Q9Y3P9;Q9BUF5;O60333;O00161;P52907;Q07954;P01009;P61158;P09486;P02794;Q15276
R-HSA-6802952	Signaling by BRAF and RAF1 fusions	7	66	0.00565698	0.000702316	0.00421389	Q96PU8;P18206;P02679;P46940;P02675;P02751;Q9Y490
R-HSA-1500931	Cell-Cell communication	10	131	0.0112283	0.000711951	0.00427171	Q14315;Q15149;O43707;P35221;Q58EX2;P19022;P46940;P35222;O60716;P21333
R-HSA-5626467	RHO GTPases activate IQGAPs	5	32	0.00274278	0.000760329	0.00456197	Q9BUF5;Q13576;P35221;P46940;P35222
R-HSA-1247673	Erythrocytes take up oxygen and release carbon dioxide	3	8	0.000685695	0.000773896	0.00464338	P00915;P68871;P69905
R-HSA-5673001	RAF/MAP kinase cascade	16	292	0.0250279	0.00080645	0.0048387	Q9UL46;P28066;O00231;Q06323;P51665;P18206;P62333;P62195;P25789;P02679;P46940;P60900;Q96S59;P02675;P02751;Q9Y490
R-HSA-6791226	Major pathway of rRNA processing in the nucleolus and cytosol	12	183	0.0156853	0.000812601	0.00487561	Q07020;P42766;P25398;P50914;P62906;P62829;P62241;P62263;P36578;P46783;P62847;P62753
R-HSA-68867	Assembly of the pre-replicative complex	9	112	0.00959973	0.000915309	0.00515016	Q9UL46;P62333;P28066;P62195;P25789;O00231;Q06323;P60900;P51665
R-HSA-597592	Post-translational protein modification	49	1430	0.122568	0.000957722	0.00515016	P54578;Q14204;Q92538;P04439;P18085;Q9HCB6;P51665;O75150;P62195;P02649;P02647;P02765;P07237;P35606;P13639;O00231;P19022;Q13409;Q06210;Q9BUF5;P68104;P02679;P60900;P02751;P53621;P00450;P28066;O43852;Q8WVM8;Q06323;P10451;P30101;P17844;Q9Y4E8;P62333;Q15084;P25789;Q16531;P02787;P26038;Q9UL46;SMAD4;P14625;P12004;Q9Y5P6;P52907;Q04206;P01009;P24821
R-HSA-5684996	MAPK1/MAPK3 signaling	16	299	0.0256278	0.00103003	0.00515016	Q9UL46;P28066;O00231;Q06323;P51665;P18206;P62333;P62195;P25789;P02679;P46940;P60900;Q96S59;P02675;P02751;Q9Y490
R-HSA-69242	S Phase	11	163	0.013971	0.00105909	0.00529546	Q9UL46;P62333;P28066;P62195;P25789;O00231;Q09028;Q06323;P60900;P51665;P12004
R-HSA-6807070	PTEN Regulation	10	139	0.0119139	0.00110821	0.00554103	Q9UL46;P62333;P28066;P62195;P25789;O00231;Q09028;Q06323;P60900;P51665
R-HSA-446728	Cell junction organization	8	93	0.0079712	0.00114102	0.00570512	Q14315;Q15149;P35221;Q58EX2;P19022;P35222;O60716;P21333
R-HSA-9754678	SARS-CoV-2 modulates host translation machinery	6	53	0.00454273	0.00120982	0.00604908	P25398;P62241;P62263;P46783;P62847;P62753
R-HSA-8868773	rRNA processing in the nucleus and cytosol	12	193	0.0165424	0.00127283	0.00636413	Q07020;P42766;P25398;P50914;P62906;P62829;P62241;P62263;P36578;P46783;P62847;P62753
R-HSA-109582	Hemostasis	29	726	0.0622268	0.00135359	0.00676793	P08758;O43852;P04899;Q9UNF1;P00747;P68871;P23528;Q9NUQ9;P02647;P02765;P02787;P07355;Q9Y490;P37802;P84095;P18206;Q9BUF5;P11021;O43707;O60333;P52907;P01009;P02679;P09486;Q14344;P02675;P02751;P10909;P21333
R-HSA-5683057	MAPK family signaling cascades	17	338	0.0289706	0.00140247	0.00701236	Q9UL46;P28066;O00231;Q06323;P51665;P18206;P62333;P62195;P25789;P02679;P46940;Q13177;P60900;Q96S59;P02675;P02751;Q9Y490
R-HSA-3858494	Beta-catenin independent WNT signaling	10	144	0.0123425	0.00143665	0.00718325	Q9UL46;P62333;P28066;P62195;P25789;O00231;P35222;Q06323;P60900;P51665
R-HSA-162909	Host Interactions of HIV factors	10	144	0.0123425	0.00143665	0.00718325	Q9UL46;P62333;P28066;P62195;P25789;O00231;Q06323;Q13177;P60900;P51665
R-HSA-9013106	RHOC GTPase cycle	7	75	0.00642839	0.00145809	0.00729047	P52565;O75955;P46940;Q6NZI2;Q07960;Q14254;P27105
R-HSA-8963888	Chylomicron assembly	3	10	0.000857118	0.00146377	0.00731885	P02649;P02647;P07237
R-HSA-9613829	Chaperone Mediated Autophagy	4	22	0.00188566	0.00149384	0.00746918	P68104;P08670;P68871;P14136
R-HSA-9662361	Sensory processing of sound by outer hair cells of the cochlea	6	56	0.00479986	0.00159518	0.0079759	P15311;P35241;Q6IBS0;P06396;P26038;P35579
R-HSA-9725370	Signaling by ALK fusions and activated point mutants	6	57	0.00488557	0.00174238	0.0087119	P18206;P26038;P62753;P02751;P35579;P40763
R-HSA-9700206	Signaling by ALK in cancer	6	57	0.00488557	0.00174238	0.0087119	P18206;P26038;P62753;P02751;P35579;P40763
R-HSA-5621481	C-type lectin receptors (CLRs)	11	174	0.0149139	0.00176515	0.00882576	Q9UL46;P62333;P28066;P62195;Q04206;P25789;O00231;Q06323;Q13177;P60900;P51665
R-HSA-3299685	Detoxification of Reactive Oxygen Species	5	39	0.00334276	0.00180802	0.00904009	Q06830;P04040;P10599;P07237;P07203
R-HSA-9659379	Sensory processing of sound	7	78	0.00668552	0.00181666	0.0090833	P15311;P52907;P35241;Q6IBS0;P06396;P26038;P35579
R-HSA-983705	Signaling by the B Cell Receptor (BCR)	11	176	0.0150853	0.00192756	0.00963781	Q9UL46;P62333;P28066;P62195;Q04206;P25789;O00231;Q06323;P60900;P51665;P21127
R-HSA-72312	rRNA processing	12	203	0.0173995	0.00193086	0.00965429	Q07020;P42766;P25398;P50914;P62906;P62829;P62241;P62263;P36578;P46783;P62847;P62753
R-HSA-6807878	COPI-mediated anterograde transport	8	102	0.00874261	0.0020236	0.010118	P53621;P35606;Q14204;Q9BUF5;Q92538;P52907;P18085;Q13409
R-HSA-5689880	Ub-specific processing proteases	12	205	0.0175709	0.00209122	0.0104561	P54578;Q9UL46;SMAD4;P62333;Q9Y4E8;P28066;P62195;P25789;O00231;Q06323;P60900;P51665
R-HSA-2173782	Binding and Uptake of Ligands by Scavenger Receptors	9	129	0.0110568	0.00237931	0.0106908	P02792;Q07954;P68871;P02649;P14625;P02647;P09486;P69905;P02794
R-HSA-69002	DNA Replication Pre-Initiation	9	129	0.0110568	0.00237931	0.0106908	Q9UL46;P62333;P28066;P62195;P25789;O00231;Q06323;P60900;P51665
R-HSA-5619115	Disorders of transmembrane transporters	11	181	0.0155138	0.0023874	0.0106908	P00450;Q9UL46;P62333;P28066;P62195;P25789;O00231;P02647;Q06323;P60900;P51665
R-HSA-68882	Mitotic Anaphase	13	237	0.0203137	0.00242448	0.0106908	Q14204;Q9UL46;P28066;O00231;Q13409;Q06323;P51665;Q9BUF5;P62333;P62195;P25789;Q15691;P60900
R-HSA-199977	ER to Golgi Anterograde Transport	10	155	0.0132853	0.00244077	0.0106908	P53621;P35606;Q14204;Q9BUF5;Q92538;P52907;P18085;Q8WVM8;P01009;Q13409
R-HSA-264870	Caspase-mediated cleavage of cytoskeletal proteins	3	12	0.00102854	0.00244966	0.0106908	Q15149;P08670;P06396
R-HSA-1237044	Erythrocytes take up carbon dioxide and release oxygen	3	12	0.00102854	0.00244966	0.0106908	P00915;P68871;P69905
R-HSA-1480926	O2/CO2 exchange in erythrocytes	3	12	0.00102854	0.00244966	0.0106908	P00915;P68871;P69905
R-HSA-2555396	Mitotic Metaphase and Anaphase	13	238	0.0203994	0.00251271	0.0106908	Q14204;Q9UL46;P28066;O00231;Q13409;Q06323;P51665;Q9BUF5;P62333;P62195;P25789;Q15691;P60900
R-HSA-69306	DNA Replication	10	157	0.0134568	0.0026727	0.0106908	Q9UL46;P62333;P28066;P62195;P25789;O00231;Q06323;P60900;P51665;P12004
R-HSA-6802957	Oncogenic MAPK signaling	7	84	0.00719979	0.00273619	0.0109447	Q96PU8;P18206;P02679;P46940;P02675;P02751;Q9Y490
R-HSA-8856688	Golgi-to-ER retrograde transport	9	137	0.0117425	0.00352463	0.0140985	P53621;P35606;Q14204;Q9BUF5;Q92538;O60333;P52907;P18085;Q13409
R-HSA-354192	Integrin signaling	4	28	0.00239993	0.0035413	0.0141652	P02679;P02675;P02751;Q9Y490
R-HSA-5218920	VEGFR2 mediated vascular permeability	4	29	0.00248564	0.00400677	0.0160271	P35221;P35222;Q13177;O60716
R-HSA-2871837	FCERI mediated NF-kB activation	10	167	0.0143139	0.0041108	0.0164432	Q9UL46;P62333;P28066;P62195;Q04206;P25789;O00231;Q06323;P60900;P51665
R-HSA-2682334	EPH-Ephrin signaling	7	92	0.00788549	0.00447325	0.017893	P23528;O15143;O15511;P61158;Q13177;P35579;P19105
R-HSA-381119	Unfolded Protein Response (UPR)	7	92	0.00788549	0.00447325	0.017893	P11021;Q15084;P14625;P20042;P05198;Q06210;Q9Y490
R-HSA-1059683	Interleukin-6 signaling	3	15	0.00128568	0.00456064	0.0182426	P42224;P40763
R-HSA-9662360	Sensory processing of sound by inner hair cells of the cochlea	6	70	0.00599983	0.00473731	0.0189492	P15311;P52907;P35241;Q6IBS0;P26038;P35579
R-HSA-9013026	RHOB GTPase cycle	6	71	0.00608554	0.005067	0.020268	O75955;O00161;Q6NZI2;Q07960;Q14254;P27105
R-HSA-201681	TCF dependent signaling in response to WNT	11	202	0.0173138	0.00538103	0.0215241	Q96HF1;Q9UL46;P62333;P28066;P62195;P25789;O00231;P35222;Q06323;P60900;P51665
R-HSA-75153	Apoptotic execution phase	5	52	0.00445702	0.00607164	0.0242866	Q15149;P08670;P06396;P35222;Q13177
R-HSA-9013408	RHOG GTPase cycle	6	74	0.00634268	0.00615721	0.0246288	P52565;P84095;Q13576;Q13177;Q7L576;Q07960
R-HSA-8980692	RHOA GTPase cycle	9	150	0.0128568	0.00626419	0.0250567	P52565;O75955;O00161;Q8WVM8;P46940;Q6NZI2;Q07960;Q14254;P27105
R-HSA-69481	G2/M Checkpoints	9	150	0.0128568	0.00626419	0.0250567	Q9UL46;P62333;P28066;P62195;P25789;O00231;Q06323;P60900;P51665
R-HSA-418990	Adherens junctions interactions	4	33	0.00282849	0.0062806	0.0251224	P35221;P19022;P35222;O60716
R-HSA-8878171	Transcriptional regulation by RUNX1	11	208	0.0178281	0.00663465	0.0265386	P17931;Q9UL46;P62333;P28066;P62195;Q99873;P25789;O00231;Q06323;P60900;P51665
R-HSA-199991	Membrane Trafficking	24	636	0.0545127	0.00696487	0.0278595	Q14204;P35606;P50395;P53621;P02792;Q92538;P18085;Q8WVM8;P54619;Q13409;O75351;P35579;Q9Y3P9;Q9BUF5;O60333;O00161;P52907;P01009;O15511;Q9NZM3;P61158;P02787;P02794;Q15276
R-HSA-1839117	Signaling by cytosolic FGFR1 fusion mutants	3	18	0.00154281	0.00751326	0.030053	P42224;Q92614;P40763
R-HSA-446203	Asparagine N-linked glycosylation	14	305	0.0261421	0.00785781	0.0314312	Q14204;P35606;P53621;Q92538;P18085;Q8WVM8;Q13409;Q06210;P30101;Q9Y5P6;Q9BUF5;P52907;P01009;P26038
R-HSA-69620	Cell Cycle Checkpoints	13	274	0.023485	0.00792635	0.0317054	Q14204;Q9UL46;P28066;O00231;Q13409;Q06323;P51665;P57723;P62333;P62195;P25789;Q15691;P60900
R-HSA-162906	HIV Infection	12	245	0.0209994	0.00834437	0.0333775	Q9UL46;P62333;P28066;P62195;Q00403;P25789;O00231;Q06323;Q13177;P60900;P51665;O75351
R-HSA-5663213	RHO GTPases Activate WASPs and WAVEs	4	36	0.00308563	0.00845806	0.0338322	O15143;O15511;P61158;Q7L576
R-HSA-948021	Transport to the Golgi and subsequent modification	10	186	0.0159424	0.0084735	0.033894	P53621;P35606;Q14204;Q9BUF5;Q92538;P52907;P18085;Q8WVM8;P01009;Q13409
R-HSA-8963898	Plasma lipoprotein assembly	3	19	0.00162852	0.00869707	0.0347883	P02649;P02647;P07237
R-HSA-2454202	Fc epsilon receptor (FCERI) signaling	11	218	0.0186852	0.00922128	0.0368851	Q9UL46;P62333;P28066;P62195;Q04206;P25789;O00231;Q06323;Q13177;P60900;P51665
R-HSA-9725371	Nuclear events stimulated by ALK signaling in cancer	3	20	0.00171424	0.00998415	0.0399366	P62753;P02751;P40763
R-HSA-9013406	RHOQ GTPase cycle	5	59	0.005057	0.0101102	0.0404407	O00161;P46940;Q13177;Q07960;P27105
R-HSA-111465	Apoptotic cleavage of cellular proteins	4	38	0.00325705	0.0101539	0.0406157	Q15149;P08670;P06396;P35222
R-HSA-5627123	RHO GTPases activate PAKs	3	21	0.00179995	0.0113762	0.0455047	Q13177;P35579;P21333
R-HSA-9671555	Signaling by PDGFR in disease	3	21	0.00179995	0.0113762	0.0455047	P42224;Q6UN15;P40763
R-HSA-216083	Integrin cell surface interactions	6	85	0.00728551	0.0116326	0.0465305	P04004;P02679;P24821;P02675;P10451;P02751
R-HSA-76009	Platelet Aggregation (Plug Formation)	4	40	0.00342847	0.0120559	0.0482237	P02679;P02675;P02751;Q9Y490
