# Supplementary material for: Large-Scale Protein Analysis of Experimental Retinal Artery Occlusion
Source: Int J Mol Sci. 2023 Apr 27;24(9):7919. doi: 10.3390/ijms24097919 (PMC10177937; doi:10.3390/ijms24097919)
Supplement: Supplementary file 1 [file ijms-24-07919-s001.zip › Table S8, Significant Reactome pathways, downregulated.xlsx]

## Sheet: Ark1
Pathway identifier	Pathway name	#Proteins found	#Total proteins in pathway	Protein ratio	pValue	FDR	Submitted proteins found	Found reaction identifiers
R-HSA-1428517	The citric acid (TCA) cycle and respiratory electron transport	39	178	0.0152567	1.11022e-16	7.37188e-14	P08559;P40926;P10515;P56134;O43678;P36542;P50213;P03928;O43837;Q9P2R7;P19404;O75390;P25705;P42704;P18859;P24539;P31040;P07195;P56385;P00403;Q16795;Q9H9P8;P20674;P07954;P10606;P51553;P53597;P36957;P48047;P28331;P11177;O95563;O75251;Q99798;P08574;P49821;P21796;P06576;P09622	R-HSA-6800870;R-HSA-70979;R-HSA-6800868;R-HSA-6799203;R-HSA-6799202;R-HSA-70982;R-HSA-204169;R-HSA-6788523;R-HSA-163214;R-HSA-163213;R-HSA-163217;R-HSA-70994;R-HSA-70997;R-HSA-450975;R-HSA-71775;R-HSA-451033;R-HSA-9012374;R-HSA-164834;R-HSA-164832;R-HSA-71397;R-HSA-71783;R-HSA-71849;R-HSA-71401;R-HSA-203946;R-HSA-164651;R-HSA-164840;R-HSA-6788556;R-HSA-6799179;R-HSA-6799178;R-HSA-70510;R-HSA-6799…
R-HSA-112315	Transmission across Chemical Synapses	37	273	0.0233993	8.88178e-16	2.94875e-13	Q9H4G0;Q13555;Q13554;P59768;P15104;P17600;Q05329;P16520;P20336;P07196;P17252;O94925;P22694;P62873;P63027;Q92777;P80404;Q15700;P47870;P28472;Q13509;Q9H598;Q9P2U7;O95782;P17612;P63211;O14936;Q99259;P21579;P63096;P60880;P68366;P04350;O14775;O14810;Q8WY54;P46459	R-HSA-9618834;R-HSA-888589;R-HSA-9611030;R-HSA-421007;R-HSA-392206;R-HSA-888577;R-HSA-442760;R-HSA-374922;R-HSA-210444;R-HSA-9610653;R-HSA-9610627;R-HSA-438037;R-HSA-1013020;R-HSA-1013013;R-HSA-1013012;R-HSA-380574;R-HSA-372505;R-HSA-888592;R-HSA-432164;R-HSA-264615;R-HSA-432162;R-HSA-9612085;R-HSA-8951727;R-HSA-170666;R-HSA-432172;R-HSA-5336443;R-HSA-9618750;R-HSA-170671;R-HSA-111919;R-HSA-17067…
R-HSA-71406	Pyruvate metabolism and Citric Acid (TCA) cycle	19	55	0.00471415	1.66533e-15	3.68039e-13	P07954;P51553;P08559;P36957;P53597;P40926;P10515;P50213;P11177;O95563;O43837;Q9P2R7;O75390;Q99798;P31040;P07195;Q9H9P8;P21796;P09622	R-HSA-70979;R-HSA-71397;R-HSA-71783;R-HSA-70982;R-HSA-71849;R-HSA-71401;R-HSA-203946;R-HSA-204169;R-HSA-70510;R-HSA-70994;R-HSA-372342;R-HSA-70997;R-HSA-70967;R-HSA-450975;R-HSA-70971;R-HSA-70975;R-HSA-71775;R-HSA-451033;R-HSA-9012374;R-HSA-880050
R-HSA-112316	Neuronal System	42	419	0.0359133	2.26597e-13	3.7615e-11	Q9H4G0;Q13555;Q14721;Q13554;P59768;O95197;P15104;P17600;P16520;Q05329;P20336;Q9Y4C0;P07196;P17252;O94925;P22694;P63027;P62873;Q92777;P80404;Q15700;P47870;P28472;Q13509;Q9H598;Q8NFZ4;Q9P2U7;Q9Y2J2;O95782;P17612;P63211;Q99259;P21579;O14936;P63096;P60880;P68366;P04350;O14775;O14810;Q8WY54;P46459	R-HSA-9618834;R-HSA-888589;R-HSA-9611030;R-HSA-6794338;R-HSA-6794336;R-HSA-421007;R-HSA-6794349;R-HSA-6794348;R-HSA-392206;R-HSA-888577;R-HSA-6794346;R-HSA-442760;R-HSA-6794345;R-HSA-374922;R-HSA-210444;R-HSA-9610653;R-HSA-6794344;R-HSA-9610627;R-HSA-6794357;R-HSA-438037;R-HSA-1013020;R-HSA-6794356;R-HSA-6794354;R-HSA-6797554;R-HSA-6797553;R-HSA-6794353;R-HSA-6794352;R-HSA-1013013;R-HSA-1013012;R…
R-HSA-71403	Citric acid cycle (TCA cycle)	12	22	0.00188566	1.5361e-12	2.02766e-10	P07954;P51553;P36957;O75390;P53597;Q99798;P40926;P31040;P50213;O43837;P09622;Q9P2R7	R-HSA-70979;R-HSA-71783;R-HSA-70982;R-HSA-71401;R-HSA-70994;R-HSA-70997;R-HSA-70967;R-HSA-450975;R-HSA-70971;R-HSA-70975;R-HSA-71775;R-HSA-451033
R-HSA-163200	Respiratory electron transport, ATP synthesis by chemiosmotic coupling, and heat production by uncoupling proteins.	21	127	0.0108854	5.63173e-11	6.1949e-09	P10606;P48047;P28331;P56134;O43678;P36542;P03928;O75251;P19404;P25705;P18859;P24539;P42704;P31040;P56385;P08574;P00403;Q16795;P49821;P06576;P20674	R-HSA-164834;R-HSA-6800870;R-HSA-164832;R-HSA-6800868;R-HSA-6799203;R-HSA-6799202;R-HSA-164651;R-HSA-164840;R-HSA-6788556;R-HSA-6799179;R-HSA-6788523;R-HSA-163214;R-HSA-6799178;R-HSA-163213;R-HSA-6799191;R-HSA-163217;R-HSA-6799197;R-HSA-6799196
R-HSA-373760	L1CAM interactions	20	121	0.0103711	1.64169e-10	1.42739e-08	P78357;Q05193;O15020;Q12860;Q13813;O94856;Q12955;Q13509;Q9UQ16;Q01484;Q01082;P32004;O95782;Q99962;P13591;Q00610;P68366;P04350;Q16555;Q92823	R-HSA-443783;R-HSA-443780;R-HSA-376134;R-HSA-443778;R-HSA-443779;R-HSA-374669;R-HSA-445071;R-HSA-445069;R-HSA-549060;R-HSA-445067;R-HSA-443784;R-HSA-374677;R-HSA-445079;R-HSA-445076;R-HSA-445077;R-HSA-374673;R-HSA-374672;R-HSA-374675;R-HSA-445084;R-HSA-374686;R-HSA-374681;R-HSA-374680;R-HSA-374683;R-HSA-373733;R-HSA-373729;R-HSA-445091;R-HSA-373730;R-HSA-445089;R-HSA-392749;R-HSA-437230;R-HSA-392…
R-HSA-112310	Neurotransmitter release cycle	14	51	0.0043713	1.71975e-10	1.42739e-08	Q9H598;Q9P2U7;P17600;Q05329;P20336;Q99259;O14936;P21579;P60880;O94925;P63027;O14810;Q92777;P80404	R-HSA-888589;R-HSA-380901;R-HSA-380869;R-HSA-264615;R-HSA-5336443;R-HSA-380905;R-HSA-888577;R-HSA-374922;R-HSA-210444;R-HSA-70609;R-HSA-888572;R-HSA-372529;R-HSA-374899;R-HSA-210426;R-HSA-916855;R-HSA-380574;R-HSA-372505;R-HSA-210430;R-HSA-888592;R-HSA-917744
R-HSA-8949613	Cristae formation	11	31	0.00265707	1.15836e-09	8.45605e-08	P25705;P18859;P48047;P24539;P56134;P56385;P36542;P03928;Q16891;P06576;P38646	R-HSA-8949609;R-HSA-8949580
R-HSA-163210	Formation of ATP by chemiosmotic coupling	9	18	0.00154281	2.05574e-09	1.35679e-07	P25705;P18859;P48047;P24539;P56134;P56385;P36542;P03928;P06576	R-HSA-164834;R-HSA-164832;R-HSA-164840
R-HSA-888590	GABA synthesis, release, reuptake and degradation	9	19	0.00162852	3.26797e-09	1.96078e-07	Q05329;P20336;P21579;Q99259;P60880;Q9H598;O14810;P63027;P80404	R-HSA-888589;R-HSA-888572;R-HSA-916855;R-HSA-888577;R-HSA-888592;R-HSA-917744
R-HSA-112314	Neurotransmitter receptors and postsynaptic signal transmission	23	208	0.0178281	1.37252e-08	7.54887e-07	Q9H4G0;Q13555;Q15700;Q13554;P47870;P28472;Q13509;P59768;O95782;P17612;P16520;P63211;O14936;P63096;P07196;P17252;P68366;P04350;P22694;O14775;P62873;Q8WY54;P46459	R-HSA-9618834;R-HSA-9619542;R-HSA-9611030;R-HSA-416320;R-HSA-421007;R-HSA-8856398;R-HSA-392206;R-HSA-442760;R-HSA-9610653;R-HSA-9610627;R-HSA-438037;R-HSA-1013020;R-HSA-1013013;R-HSA-1013012;R-HSA-416985;R-HSA-432164;R-HSA-975340;R-HSA-442725;R-HSA-432162;R-HSA-9612085;R-HSA-8951727;R-HSA-170666;R-HSA-442732;R-HSA-432172;R-HSA-500717;R-HSA-9619449;R-HSA-9618750;R-HSA-9610879;R-HSA-170671;R-HSA-11…
R-HSA-1268020	Mitochondrial protein import	13	65	0.00557127	3.14397e-08	1.60342e-06	O75746;P51553;P12235;P38646;Q9NS69;O75390;Q99798;P25705;O94826;P08574;Q9UJS0;P21796;P06576	R-HSA-1299475;R-HSA-1299478;R-HSA-1268022;R-HSA-1299476;R-HSA-1307803;R-HSA-1299482;R-HSA-1955380;R-HSA-1299481;R-HSA-1268025;R-HSA-1299480;R-HSA-1299487;R-HSA-8986181;R-HSA-1299484
R-HSA-70263	Gluconeogenesis	10	34	0.0029142	3.78285e-08	1.77794e-06	O75746;Q02978;P00505;P40926;P40925;P60174;P17174;P09972;Q9UJS0;P09104	R-HSA-70481;R-HSA-70592;R-HSA-70613;R-HSA-372448;R-HSA-376851;R-HSA-71783;R-HSA-71495;R-HSA-198440;R-HSA-70494;R-HSA-198508
R-HSA-212676	Dopamine Neurotransmitter Release Cycle	8	23	0.00197137	2.53587e-07	1.11578e-05	P17600;P20336;O14936;P21579;P60880;O14810;P63027;Q92777	R-HSA-380869;R-HSA-5336443;R-HSA-380574
R-HSA-422356	Regulation of insulin secretion	13	79	0.00677124	2.85819e-07	1.17186e-05	Q14721;P29992;P59768;P63211;P17612;P16520;P63096;P60880;P17252;P22694;O14775;P62873;P63027	R-HSA-400037;R-HSA-400097;R-HSA-400046;R-HSA-381644;R-HSA-400015;R-HSA-381612;R-HSA-265166;R-HSA-399978;R-HSA-9728664;R-HSA-381707;R-HSA-381706;R-HSA-400023;R-HSA-381713;R-HSA-416530;R-HSA-265682;R-HSA-422320;R-HSA-399998;R-HSA-400063;R-HSA-400092;R-HSA-400027;R-HSA-399995
R-HSA-9662360	Sensory processing of sound by inner hair cells of the cochlea	12	70	0.00599983	5.37435e-07	2.096e-05	Q9H4G0;P17600;P20336;P56545;O14936;Q13813;P60880;P20020;Q01082;P63027;Q01814;Q9Y2J2	R-HSA-9662114;R-HSA-9662096;R-HSA-9664214;R-HSA-9659380
R-HSA-181429	Serotonin Neurotransmitter Release Cycle	7	18	0.00154281	6.9049e-07	2.48576e-05	P17600;P20336;P21579;P60880;O14810;P63027;Q92777	R-HSA-380901;R-HSA-380905
R-HSA-437239	Recycling pathway of L1	10	49	0.00419988	1.03286e-06	3.51174e-05	Q05193;Q99962;P68366;Q00610;Q13509;P04350;Q9UQ16;Q16555;P32004;O95782	R-HSA-443783;R-HSA-443779;R-HSA-445089;R-HSA-392749;R-HSA-445071;R-HSA-392748;R-HSA-374696;R-HSA-373736;R-HSA-374677;R-HSA-445079;R-HSA-555065;R-HSA-445077;R-HSA-445084;R-HSA-374680
R-HSA-199991	Membrane Trafficking	39	636	0.0545127	1.17805e-06	3.88756e-05	Q05193;O15020;Q13813;Q9BY11;Q2M2I8;Q7Z4S6;Q9UQ16;Q9Y4I1;Q99962;P20336;O60641;P61981;Q00610;Q9BQI5;P43034;P09497;P63027;P49418;O00139;Q12955;Q13509;Q9H115;O43426;Q01484;Q01082;O00499;O95782;O75061;Q5SYC1;P21579;Q96FJ2;P68366;P31150;Q96QF0;P04350;P60520;O14576;P46459	R-HSA-8868230;R-HSA-5694423;R-HSA-8868236;R-HSA-1445149;R-HSA-8877451;R-HSA-5694425;R-HSA-8847638;R-HSA-8847637;R-HSA-2316347;R-HSA-8876191;R-HSA-8876190;R-HSA-8867613;R-HSA-8871196;R-HSA-8876188;R-HSA-8871194;R-HSA-8871193;R-HSA-190877;R-HSA-8876454;R-HSA-6807877;R-HSA-8876837;R-HSA-6807875;R-HSA-8877475;R-HSA-8876193;R-HSA-8877998;R-HSA-8867756;R-HSA-8877612;R-HSA-8868651;R-HSA-8867754;R-HSA-88…
R-HSA-9659379	Sensory processing of sound	12	78	0.00668552	1.6335e-06	5.06385e-05	Q9H4G0;P17600;P20336;P56545;O14936;Q13813;P60880;P20020;Q01082;P63027;Q01814;Q9Y2J2	R-HSA-9663363;R-HSA-9662114;R-HSA-9662096;R-HSA-9664214;R-HSA-9659380
R-HSA-77387	Insulin receptor recycling	8	30	0.00257136	1.81123e-06	5.4337e-05	Q93050;Q16864;P21283;P21281;P36543;P38606;P61421;Q9UI12	R-HSA-74723;R-HSA-5252133
R-HSA-445095	Interaction between L1 and Ankyrins	8	31	0.00265707	2.30148e-06	6.10449e-05	O15020;Q13813;Q12955;O94856;Q01484;Q01082;Q92823;P32004	R-HSA-445076;R-HSA-374675;R-HSA-392751;R-HSA-373739
R-HSA-917977	Transferrin endocytosis and recycling	8	31	0.00265707	2.30148e-06	6.10449e-05	Q93050;Q16864;P21283;P21281;P36543;P38606;P61421;Q9UI12	R-HSA-5252133;R-HSA-917841
R-HSA-8856828	Clathrin-mediated endocytosis	16	145	0.0124282	2.34788e-06	6.10449e-05	Q05193;Q9BY11;Q2M2I8;O43426;Q9UQ16;O00499;O95782;O75061;Q99962;P21579;O60641;Q00610;Q9BQI5;P09497;P63027;P49418	R-HSA-8868230;R-HSA-9681616;R-HSA-8868236;R-HSA-8862280;R-HSA-8867613;R-HSA-8871196;R-HSA-8871194;R-HSA-8871193;R-HSA-8868071;R-HSA-8866279;R-HSA-8863463;R-HSA-8866277;R-HSA-8856813;R-HSA-8867756;R-HSA-8868651;R-HSA-8866283;R-HSA-8867754;R-HSA-8856808;R-HSA-8868072;R-HSA-8868648;R-HSA-8868661;R-HSA-8868660;R-HSA-8868659;R-HSA-8868658;R-HSA-8869438
R-HSA-70326	Glucose metabolism	13	98	0.00839976	3.0165e-06	7.54124e-05	O75746;P40926;P40925;P19367;P17612;Q02978;P00505;P60174;P17174;P09972;Q9UJS0;P22694;P09104	R-HSA-70592;R-HSA-372448;R-HSA-71783;R-HSA-71495;R-HSA-71496;R-HSA-198440;R-HSA-71660;R-HSA-198508;R-HSA-70481;R-HSA-70613;R-HSA-70420;R-HSA-376851;R-HSA-70454;R-HSA-163773;R-HSA-70494
R-HSA-9660821	ADORA2B mediated anti-inflammatory cytokines production	9	44	0.00377132	3.52097e-06	8.45034e-05	P17612;P16520;P63211;P63096;P19086;P22694;O14775;P59768;P62873	R-HSA-9660819;R-HSA-392129;R-HSA-111925;R-HSA-111924;R-HSA-8951727;R-HSA-9660824;R-HSA-111919;R-HSA-9660828
R-HSA-210500	Glutamate Neurotransmitter Release Cycle	7	24	0.00205708	4.51941e-06	0.000103946	P20336;P21579;P60880;O94925;O14810;P63027;Q9P2U7	R-HSA-70609;R-HSA-210426;R-HSA-210430;R-HSA-210444
R-HSA-1222556	ROS and RNS production in phagocytes	8	36	0.00308563	6.79391e-06	0.000147607	Q93050;Q16864;P21283;P21281;P36543;P38606;P61421;Q9UI12	R-HSA-1222516
R-HSA-111885	Opioid Signalling	12	90	0.00771407	6.87499e-06	0.000147607	Q13555;P63211;P17612;P16520;Q13554;P29992;P63096;P17252;P22694;O14775;P59768;P62873	R-HSA-9618834;R-HSA-177284;R-HSA-111879;R-HSA-167429;R-HSA-167433;R-HSA-392206;R-HSA-112271;R-HSA-111966;R-HSA-442725;R-HSA-111970;R-HSA-112037;R-HSA-8951727;R-HSA-170666;R-HSA-180073;R-HSA-170671;R-HSA-111919;R-HSA-170674;R-HSA-167408;R-HSA-111925;R-HSA-111924;R-HSA-167415;R-HSA-177275;R-HSA-167419;R-HSA-170686;R-HSA-9617583;R-HSA-444792;R-HSA-111870
R-HSA-9634597	GPER1 signaling	9	48	0.00411417	7.02889e-06	0.000147607	P17612;P16520;P63211;P63096;P19086;P22694;O14775;P59768;P62873	R-HSA-392129;R-HSA-111925;R-HSA-9036301;R-HSA-111924;R-HSA-8951727;R-HSA-9036307;R-HSA-9624014;R-HSA-9036308
R-HSA-418597	G alpha (z) signalling events	9	49	0.00419988	8.27022e-06	0.000165404	P16520;P63211;P63096;P17252;P19086;O14775;Q02156;P59768;P62873	R-HSA-392133;R-HSA-392129;R-HSA-392064;R-HSA-8982703;R-HSA-749453;R-HSA-750988;R-HSA-8982018;R-HSA-751040;R-HSA-8982021;R-HSA-8981892;R-HSA-749446;R-HSA-751024;R-HSA-8982709
R-HSA-163685	Integration of energy metabolism	13	109	0.00934259	9.29599e-06	0.00018592	Q14721;P29992;P59768;P63211;P17612;P16520;P63096;P60880;P17252;P22694;O14775;P62873;P63027	R-HSA-381644;R-HSA-400015;R-HSA-265166;R-HSA-9728664;R-HSA-381707;R-HSA-381706;R-HSA-400023;R-HSA-825631;R-HSA-381713;R-HSA-416530;R-HSA-265682;R-HSA-163672;R-HSA-400092;R-HSA-400027;R-HSA-163676;R-HSA-400037;R-HSA-400097;R-HSA-400046;R-HSA-381612;R-HSA-399978;R-HSA-111925;R-HSA-422320;R-HSA-399998;R-HSA-400063;R-HSA-399995;R-HSA-163773
R-HSA-1592230	Mitochondrial biogenesis	12	96	0.00822834	1.29678e-05	0.000246387	P25705;P18859;P48047;P24539;P56134;P56385;P36542;P03928;Q16891;P06576;P38646;P04179	R-HSA-8949609;R-HSA-8949580;R-HSA-5688289;R-HSA-1592247
R-HSA-5578775	Ion homeostasis	9	54	0.00462844	1.76812e-05	0.000318261	Q13555;P17612;Q13554;P13637;P20020;Q16720;P50993;Q01814;P05026	R-HSA-427910;R-HSA-418309;R-HSA-9684068;R-HSA-5617182;R-HSA-5617179;R-HSA-936897
R-HSA-70268	Pyruvate metabolism	7	31	0.00265707	2.31663e-05	0.000396781	P08559;P10515;P07195;P11177;O95563;P21796;P09622	R-HSA-372342;R-HSA-71397;R-HSA-71849;R-HSA-203946;R-HSA-204169;R-HSA-70510;R-HSA-9012374
R-HSA-6807878	COPI-mediated anterograde transport	12	102	0.00874261	2.33401e-05	0.000396781	O15020;Q13813;Q96FJ2;Q12955;P68366;Q13509;Q9H115;P04350;Q01484;O14576;Q01082;P46459	R-HSA-6809015;R-HSA-6809014;R-HSA-6807877;R-HSA-6809011;R-HSA-6807875;R-HSA-6809010;R-HSA-6809006;R-HSA-6809003
R-HSA-381676	Glucagon-like Peptide-1 (GLP1) regulates insulin secretion	8	43	0.00368561	2.4009e-05	0.000408153	Q14721;P17612;P16520;P63211;P22694;O14775;P59768;P62873	R-HSA-381713;R-HSA-422320;R-HSA-381644;R-HSA-381612;R-HSA-9728664;R-HSA-381707;R-HSA-381706
R-HSA-611105	Respiratory electron transport	12	103	0.00882832	2.56349e-05	0.000410159	P19404;P10606;P28331;P42704;P31040;P08574;P00403;Q16795;P49821;O43678;P20674;O75251	R-HSA-6800870;R-HSA-6800868;R-HSA-6799203;R-HSA-6799202;R-HSA-164651;R-HSA-6788556;R-HSA-6799179;R-HSA-6788523;R-HSA-163214;R-HSA-6799178;R-HSA-163213;R-HSA-6799191;R-HSA-163217;R-HSA-6799197;R-HSA-6799196
R-HSA-9609736	Assembly and cell surface presentation of NMDA receptors	8	44	0.00377132	2.82092e-05	0.000451348	Q13555;Q15700;Q13554;O14936;P07196;P68366;Q13509;P04350	R-HSA-9610627;R-HSA-9611030;R-HSA-9610408;R-HSA-9611368;R-HSA-9610879;R-HSA-9610653
R-HSA-392170	ADP signalling through P2Y purinoceptor 12	6	22	0.00188566	3.17869e-05	0.000476804	P16520;P63211;P63096;O14775;P59768;P62873	R-HSA-392195;R-HSA-392187;R-HSA-392202
R-HSA-2132295	MHC class II antigen presentation	14	142	0.0121711	3.41002e-05	0.000511503	Q05193;O00139;O15020;Q9BXW6;Q13509;Q9UQ16;O95782;Q99962;Q96FJ2;Q00610;P68366;P04350;O14576	R-HSA-2130640;R-HSA-2130641;R-HSA-2213248;R-HSA-8951498;R-HSA-2130725;R-HSA-2213236;R-HSA-2130486;R-HSA-2130619
R-HSA-2514859	Inactivation, recovery and regulation of the phototransduction cascade	7	33	0.00282849	3.43119e-05	0.000514678	P43080;P29973;P63211;P17252;P11488;O14775;P62873	R-HSA-2584246;R-HSA-2534087;R-HSA-74882;R-HSA-2530501;R-HSA-74885;R-HSA-2534096;R-HSA-74615;R-HSA-2586748;R-HSA-3229181;R-HSA-2534040;R-HSA-74031
R-HSA-2514856	The phototransduction cascade	7	34	0.0029142	4.1349e-05	0.000550809	P43080;P29973;P63211;P17252;P11488;O14775;P62873	R-HSA-2534087;R-HSA-74882;R-HSA-2530501;R-HSA-74885;R-HSA-74059;R-HSA-3229181;R-HSA-74031;R-HSA-74065;R-HSA-2584246;R-HSA-2514867;R-HSA-2534096;R-HSA-74615;R-HSA-2514865;R-HSA-2485180;R-HSA-2485182;R-HSA-2586748;R-HSA-2534040
R-HSA-447043	Neurofascin interactions	4	7	0.000599983	4.17171e-05	0.000550809	P78357;Q12860;O94856;Q92823	R-HSA-373733;R-HSA-373729;R-HSA-445091;R-HSA-373730;R-HSA-443774;R-HSA-437243;R-HSA-373738
R-HSA-177504	Retrograde neurotrophin signalling	5	14	0.00119997	4.17665e-05	0.000550809	Q05193;Q99962;Q00610;Q9UQ16;O95782	R-HSA-177491;R-HSA-177479;R-HSA-177501
R-HSA-983712	Ion channel transport	16	184	0.015771	4.23699e-05	0.000550809	Q13555;Q13554;Q16864;P21283;P13637;P21281;P36543;P38606;P50993;Q93050;P20020;Q16720;P61421;Q01814;Q9UI12;P05026	R-HSA-427910;R-HSA-418309;R-HSA-5252133;R-HSA-9684068;R-HSA-936897
R-HSA-390466	Chaperonin-mediated protein folding	11	92	0.00788549	4.40828e-05	0.000573077	P16520;P63211;P51784;P29992;P68366;Q13509;P04350;O14775;P59768;P62873;P49758	R-HSA-6814119;R-HSA-8850534;R-HSA-390470;R-HSA-8850529;R-HSA-389954;R-HSA-8850560;R-HSA-6814124;R-HSA-389961;R-HSA-8850539;R-HSA-6814121;R-HSA-6814120;R-HSA-6814418;R-HSA-389970;R-HSA-8850527;R-HSA-389980
R-HSA-392518	Signal amplification	7	35	0.00299991	4.95289e-05	0.000643875	P16520;P63211;P63096;P29992;O14775;P59768;P62873	R-HSA-392195;R-HSA-428750;R-HSA-428749;R-HSA-428941;R-HSA-428909;R-HSA-392202;R-HSA-428918;R-HSA-418581;R-HSA-428917;R-HSA-418579;R-HSA-428752;R-HSA-418576;R-HSA-392187
R-HSA-202040	G-protein activation	6	24	0.00205708	5.12659e-05	0.000666457	P16520;P63211;P29992;O14775;P59768;P62873	R-HSA-167408;R-HSA-167415;R-HSA-167429;R-HSA-167419;R-HSA-167433;R-HSA-112271
R-HSA-418592	ADP signalling through P2Y purinoceptor 1	6	25	0.0021428	6.40666e-05	0.0007688	P16520;P63211;P29992;O14775;P59768;P62873	R-HSA-418581;R-HSA-418579;R-HSA-418576;R-HSA-428941
R-HSA-432720	Lysosome Vesicle Biogenesis	7	37	0.00317134	6.98783e-05	0.00083854	O75061;Q99962;Q5SYC1;Q00610;P09497;P63027	R-HSA-432706;R-HSA-432707;R-HSA-432688;R-HSA-5333658;R-HSA-432712
R-HSA-5653656	Vesicle-mediated transport	39	762	0.0653124	6.99016e-05	0.000838819	Q05193;O15020;Q13813;Q9BY11;Q2M2I8;Q7Z4S6;Q9UQ16;Q9Y4I1;Q99962;P20336;O60641;P61981;Q00610;Q9BQI5;P43034;P09497;P63027;P49418;O00139;Q12955;Q13509;Q9H115;O43426;Q01484;Q01082;O00499;O95782;O75061;Q5SYC1;P21579;Q96FJ2;P68366;P31150;Q96QF0;P04350;P60520;O14576;P46459	R-HSA-8868230;R-HSA-5694423;R-HSA-8868236;R-HSA-1445149;R-HSA-8877451;R-HSA-5694425;R-HSA-8847638;R-HSA-8847637;R-HSA-2316347;R-HSA-8876191;R-HSA-8876190;R-HSA-8867613;R-HSA-8871196;R-HSA-8876188;R-HSA-8871194;R-HSA-8871193;R-HSA-190877;R-HSA-8876454;R-HSA-6807877;R-HSA-8876837;R-HSA-6807875;R-HSA-8877475;R-HSA-8876193;R-HSA-8877998;R-HSA-8867756;R-HSA-8877612;R-HSA-8868651;R-HSA-8867754;R-HSA-88…
R-HSA-442755	Activation of NMDA receptors and postsynaptic events	11	97	0.00831405	7.02751e-05	0.000843301	Q13555;Q15700;P17612;Q13554;O14936;P07196;P68366;Q13509;P04350;P22694;Q8WY54	R-HSA-9618834;R-HSA-9619542;R-HSA-9611030;R-HSA-442760;R-HSA-9610653;R-HSA-9610627;R-HSA-438037;R-HSA-432164;R-HSA-442725;R-HSA-432162;R-HSA-9612085;R-HSA-8951727;R-HSA-442732;R-HSA-432172;R-HSA-9619449;R-HSA-9618750;R-HSA-9610879;R-HSA-111919;R-HSA-445367;R-HSA-111925;R-HSA-9619430;R-HSA-111924;R-HSA-9610408;R-HSA-9611368;R-HSA-9614185;R-HSA-9617326;R-HSA-9617583;R-HSA-444792
R-HSA-391251	Protein folding	11	98	0.00839976	7.6868e-05	0.000845548	P16520;P63211;P51784;P29992;P68366;Q13509;P04350;O14775;P59768;P62873;P49758	R-HSA-6814119;R-HSA-389956;R-HSA-390470;R-HSA-389955;R-HSA-389954;R-HSA-8850560;R-HSA-389964;R-HSA-6814124;R-HSA-389961;R-HSA-6814121;R-HSA-389963;R-HSA-6814120;R-HSA-389972;R-HSA-389974;R-HSA-389969;R-HSA-389970;R-HSA-8850527;R-HSA-389980;R-HSA-389976;R-HSA-389978;R-HSA-8850534;R-HSA-8850529;R-HSA-8850539;R-HSA-6814418
R-HSA-428930	Thromboxane signalling through TP receptor	6	26	0.00222851	7.92989e-05	0.000872288	P16520;P63211;P29992;O14775;P59768;P62873	R-HSA-428918;R-HSA-428917;R-HSA-428752;R-HSA-428750;R-HSA-428749;R-HSA-428909
R-HSA-6814122	Cooperation of PDCL (PhLP1) and TRiC/CCT in G-protein beta folding	7	38	0.00325705	8.23559e-05	0.000905915	P16520;P63211;P29992;O14775;P59768;P62873;P49758	R-HSA-6814119;R-HSA-8850534;R-HSA-6814418;R-HSA-8850529;R-HSA-8850560;R-HSA-8850527;R-HSA-6814124;R-HSA-8850539;R-HSA-6814121;R-HSA-6814120
R-HSA-264642	Acetylcholine Neurotransmitter Release Cycle	5	17	0.0014571	0.000103369	0.00113706	P20336;P21579;P60880;P63027;O14810	R-HSA-264615;R-HSA-372529;R-HSA-372505
R-HSA-400042	Adrenaline,noradrenaline inhibits insulin secretion	6	28	0.00239993	0.000118374	0.00130212	P16520;P63211;P63096;O14775;P59768;P62873	R-HSA-400037;R-HSA-400097;R-HSA-400046;R-HSA-400063;R-HSA-400092
R-HSA-936837	Ion transport by P-type ATPases	8	55	0.00471415	0.000131045	0.00131045	Q13555;Q13554;P13637;P20020;Q16720;P50993;Q01814;P05026	R-HSA-427910;R-HSA-418309;R-HSA-9684068;R-HSA-936897
R-HSA-8964315	G beta:gamma signalling through BTK	5	18	0.00154281	0.00013464	0.0013464	P63211;P16520;O14775;P59768;P62873	R-HSA-8964317;R-HSA-8964271;R-HSA-8964241
R-HSA-181430	Norepinephrine Neurotransmitter Release Cycle	5	18	0.00154281	0.00013464	0.0013464	P20336;P21579;P60880;P63027;O14810	R-HSA-374899;R-HSA-374922
R-HSA-418346	Platelet homeostasis	10	88	0.00754264	0.000146609	0.00146609	P16520;P63211;Q16537;Q02153;P20020;O14775;Q16720;P59768;P62873;Q01814	R-HSA-392852;R-HSA-418309;R-HSA-392870;R-HSA-432143;R-HSA-392143;R-HSA-392152;R-HSA-392874
R-HSA-1852241	Organelle biogenesis and maintenance	20	298	0.0255421	0.000168347	0.00168347	P48047;P56134;Q13509;P36542;P03928;P38646;P17612;P61981;P25705;P18859;P24539;Q96FJ2;P68366;Q96QF0;P56385;P04350;P43034;Q16891;P06576;P04179	R-HSA-5617815;R-HSA-8949580;R-HSA-5625424;R-HSA-5625426;R-HSA-5623519;R-HSA-5618328;R-HSA-5617816;R-HSA-5618331;R-HSA-5625421;R-HSA-5625416;R-HSA-5626699;R-HSA-5624949;R-HSA-8949609;R-HSA-5626228;R-HSA-5626227;R-HSA-5638014;R-HSA-5626681;R-HSA-5624952;R-HSA-1592247;R-HSA-5638009;R-HSA-5623525;R-HSA-5623524;R-HSA-5623527;R-HSA-5623521;R-HSA-5688289;R-HSA-5626220;R-HSA-5626223
R-HSA-9609507	Protein localization	14	166	0.0142282	0.000173103	0.00168547	O75746;P51553;P12235;P38646;Q9NS69;O75390;Q99798;P25705;O94826;P08574;Q9UJS0;P63027;P21796;P06576	R-HSA-1299475;R-HSA-1299478;R-HSA-1268022;R-HSA-1299476;R-HSA-1307803;R-HSA-1299482;R-HSA-1955380;R-HSA-9617595;R-HSA-1299481;R-HSA-1268025;R-HSA-1299480;R-HSA-1299487;R-HSA-8986181;R-HSA-9617596;R-HSA-1299484;R-HSA-9609917;R-HSA-9609921;R-HSA-9609860;R-HSA-9610442;R-HSA-9609899
R-HSA-917937	Iron uptake and transport	8	58	0.00497129	0.000187274	0.00168547	Q93050;Q16864;P21283;P21281;P36543;P38606;P61421;Q9UI12	R-HSA-5252133;R-HSA-917841
R-HSA-432040	Vasopressin regulates renal water homeostasis via Aquaporins	7	44	0.00377132	0.000200968	0.00174742	P17612;P16520;P63211;P22694;O14775;P59768;P62873	R-HSA-111925;R-HSA-432195;R-HSA-422320;R-HSA-8951727;R-HSA-432188;R-HSA-432232
R-HSA-399719	Trafficking of AMPA receptors	6	31	0.00265707	0.000204097	0.00174742	Q9H4G0;Q13555;Q13554;P17252;O95782;P46459	R-HSA-416320;R-HSA-421007;R-HSA-416639;R-HSA-416985
R-HSA-399721	Glutamate binding, activation of AMPA receptors and synaptic plasticity	6	31	0.00265707	0.000204097	0.00174742	Q9H4G0;Q13555;Q13554;P17252;O95782;P46459	R-HSA-416320;R-HSA-421007;R-HSA-416639;R-HSA-416985
R-HSA-389661	Glyoxylate metabolism and glycine degradation	6	31	0.00265707	0.000204097	0.00174742	P36957;P08559;P00505;P10515;P11177;P09622	R-HSA-5694018;R-HSA-6792572;R-HSA-6784393
R-HSA-418217	G beta:gamma signalling through PLC beta	5	20	0.00171424	0.000218428	0.00174742	P63211;P16520;O14775;P59768;P62873	R-HSA-398193;R-HSA-398040
R-HSA-8964616	G beta:gamma signalling through CDC42	5	20	0.00171424	0.000218428	0.00174742	P63211;P16520;O14775;P59768;P62873	R-HSA-8964634;R-HSA-8964604;R-HSA-8964605;R-HSA-8964614;R-HSA-8964599
R-HSA-392851	Prostacyclin signalling through prostacyclin receptor	5	20	0.00171424	0.000218428	0.00174742	P63211;P16520;O14775;P59768;P62873	R-HSA-392852;R-HSA-392870;R-HSA-392874
R-HSA-2485179	Activation of the phototransduction cascade	4	11	0.00094283	0.000234116	0.00187292	P63211;P29973;P11488;P62873	R-HSA-74065;R-HSA-2514867;R-HSA-2514865;R-HSA-2485180;R-HSA-74059;R-HSA-2485182
R-HSA-977443	GABA receptor activation	8	60	0.00514271	0.000234766	0.00187813	P16520;P63211;P63096;P47870;P28472;O14775;P59768;P62873	R-HSA-170674;R-HSA-975340;R-HSA-1013020;R-HSA-170666;R-HSA-8856398;R-HSA-1013013;R-HSA-1013012;R-HSA-392206;R-HSA-170686;R-HSA-170671
R-HSA-456926	Thrombin signalling through proteinase activated receptors (PARs)	6	32	0.00274278	0.000241562	0.00193249	P16520;P63211;P29992;O14775;P59768;P62873	R-HSA-396996;R-HSA-397891;R-HSA-114552;R-HSA-396941;R-HSA-397835;R-HSA-114558
R-HSA-1430728	Metabolism	82	2143	0.18368	0.000252359	0.00201887	Q14721;O75746;Q9UJ14;P08559;P40926;P10515;P40925;O43678;P36542;Q86U28;P50213;Q8IV08;O43837;P12532;Q9P2R7;P19404;O75390;Q02978;P00505;P42704;P07195;P60174;Q8N142;P09972;Q16795;Q9UJS0;P22694;P62873;P20674;P07954;P10606;P51553;Q8TC12;P28331;P48047;O00154;Q9H7Z7;P11177;O95563;O75251;P63211;Q99798;P63096;Q01433;P08574;P09104;P09622;P29992;P56134;O95292;O00562;P59768;P03928;P15104;P16520;P25705;P23526;…	R-HSA-975629;R-HSA-6799203;R-HSA-6799202;R-HSA-9728664;R-HSA-381707;R-HSA-381706;R-HSA-825631;R-HSA-381713;R-HSA-416530;R-HSA-5694018;R-HSA-70420;R-HSA-376851;R-HSA-1675776;R-HSA-6792572;R-HSA-9012374;R-HSA-1675836;R-HSA-8943279;R-HSA-164651;R-HSA-198440;R-HSA-6799179;R-HSA-6799178;R-HSA-76590;R-HSA-6799191;R-HSA-111925;R-HSA-70967;R-HSA-70454;R-HSA-70713;R-HSA-6799197;R-HSA-70971;R-HSA-6799196;R…
R-HSA-382551	Transport of small molecules	36	729	0.0624839	0.000267791	0.00214233	Q13555;Q13554;Q16864;P45880;P36543;Q9Y6M7;P38606;P59768;P50993;P35612;P12235;P16520;Q00610;P22694;P61421;P62873;Q6U841;Q9H936;P21283;P13637;P21281;Q9H598;Q9P2U7;O95782;Q9H2X9;P17612;P63211;Q93050;P05141;P20020;O14775;Q16720;Q01814;P21796;Q9UI12;P05026	R-HSA-427910;R-HSA-418309;R-HSA-6784738;R-HSA-432195;R-HSA-5672027;R-HSA-163215;R-HSA-425483;R-HSA-936897;R-HSA-8949145;R-HSA-428052;R-HSA-428625;R-HSA-8855131;R-HSA-8855130;R-HSA-917841;R-HSA-8875623;R-HSA-5682101;R-HSA-8951727;R-HSA-5226979;R-HSA-426155;R-HSA-432232;R-HSA-425577;R-HSA-5250209;R-HSA-111925;R-HSA-5252133;R-HSA-422320;R-HSA-9684068;R-HSA-6784735;R-HSA-432188;R-HSA-6784729
R-HSA-9617324	Negative regulation of NMDA receptor-mediated neuronal transmission	5	21	0.00179995	0.000272858	0.00218286	Q13555;Q15700;Q13554;P07196;Q8WY54	R-HSA-9619430;R-HSA-9619449;R-HSA-9617326
R-HSA-500657	Presynaptic function of Kainate receptors	5	21	0.00179995	0.000272858	0.00218286	P63211;P16520;O14775;P59768;P62873	R-HSA-500717
R-HSA-8963693	Aspartate and asparagine metabolism	4	12	0.00102854	0.000324779	0.00259823	O75746;P00505;P17174;Q9UJS0	R-HSA-70592;R-HSA-70581;R-HSA-70596;R-HSA-372448
R-HSA-9663891	Selective autophagy	9	82	0.00702837	0.000400415	0.00320332	Q9NS69;Q96FJ2;P68366;Q13509;O95140;O94826;P04350;O14576;P21796	R-HSA-5205663;R-HSA-5205661;R-HSA-9646679;R-HSA-9646390;R-HSA-5205673;R-HSA-9646383;R-HSA-5205682;R-HSA-9646685;R-HSA-5205649;R-HSA-9646348
R-HSA-438064	Post NMDA receptor activation events	9	84	0.00719979	0.000475256	0.00332679	Q13555;Q15700;P17612;Q13554;P07196;P68366;Q13509;P04350;P22694	R-HSA-9618834;R-HSA-442725;R-HSA-9619542;R-HSA-9612085;R-HSA-8951727;R-HSA-442732;R-HSA-9618750;R-HSA-442760;R-HSA-111919;R-HSA-445367;R-HSA-111925;R-HSA-111924;R-HSA-9617583;R-HSA-444792
R-HSA-422475	Axon guidance	29	558	0.0478272	0.000488208	0.00341746	Q05193;O15020;Q12860;Q13813;O75122;Q9UQ16;P32004;Q99962;P13591;P17252;Q00610;P22694;Q14194;P09497;Q16555;P47736;P78357;O94856;Q12955;Q13509;Q01484;Q01082;Q9BPU6;O95782;P17612;P68366;O14531;P04350;Q92823	R-HSA-443783;R-HSA-525833;R-HSA-443780;R-HSA-443778;R-HSA-443779;R-HSA-374669;R-HSA-445071;R-HSA-445069;R-HSA-445067;R-HSA-443784;R-HSA-374677;R-HSA-445079;R-HSA-445076;R-HSA-445077;R-HSA-374673;R-HSA-374672;R-HSA-374675;R-HSA-445084;R-HSA-374686;R-HSA-374681;R-HSA-374680;R-HSA-374683;R-HSA-445091;R-HSA-445089;R-HSA-392749;R-HSA-392748;R-HSA-392751;R-HSA-374696;R-HSA-443817;R-HSA-447030;R-HSA-422…
R-HSA-392451	G beta:gamma signalling through PI3Kgamma	5	25	0.0021428	0.000598858	0.00419201	P63211;P16520;O14775;P59768;P62873	R-HSA-392295;R-HSA-392300
R-HSA-445717	Aquaporin-mediated transport	7	53	0.00454273	0.00060499	0.00423493	P17612;P16520;P63211;P22694;O14775;P59768;P62873	R-HSA-111925;R-HSA-432195;R-HSA-422320;R-HSA-8951727;R-HSA-432188;R-HSA-432232
R-HSA-112040	G-protein mediated events	7	54	0.00462844	0.000674388	0.00472071	Q13555;P17612;Q13554;P63096;P29992;P17252;P22694	R-HSA-9618834;R-HSA-442725;R-HSA-111970;R-HSA-112037;R-HSA-111879;R-HSA-8951727;R-HSA-170666;R-HSA-392206;R-HSA-170671;R-HSA-111919;R-HSA-170674;R-HSA-111925;R-HSA-111924;R-HSA-170686;R-HSA-9617583;R-HSA-444792;R-HSA-111870;R-HSA-111966
R-HSA-5099900	WNT5A-dependent internalization of FZD4	4	15	0.00128568	0.00074522	0.00521654	P17252;Q00610;P09497;O95782	R-HSA-5138459;R-HSA-5138432;R-HSA-5138433
R-HSA-9639288	Amino acids regulate mTORC1	7	55	0.00471415	0.000749949	0.00524964	Q16864;P21283;P21281;P36543;P38606;P61421;Q9UI12	R-HSA-9640195;R-HSA-9640167;R-HSA-9639286;R-HSA-9646468;R-HSA-9640168;R-HSA-9645608;R-HSA-9640175;R-HSA-9645598
R-HSA-1489509	DAG and IP3 signaling	6	41	0.00351419	0.000877375	0.00614163	Q13555;P17612;Q13554;P17252;P22694;Q02156	R-HSA-9618834;R-HSA-442725;R-HSA-111970;R-HSA-111925;R-HSA-111924;R-HSA-8951727;R-HSA-198314;R-HSA-9617583;R-HSA-444792;R-HSA-111919;R-HSA-111966
R-HSA-399956	CRMPs in Sema3A signaling	4	16	0.00137139	0.000945005	0.00620595	O14531;Q16555;Q14194;Q9BPU6	R-HSA-399951;R-HSA-399947;R-HSA-399944
R-HSA-204174	Regulation of pyruvate dehydrogenase (PDH) complex	4	16	0.00137139	0.000945005	0.00620595	P08559;P10515;P11177;P09622	R-HSA-203946;R-HSA-204169
R-HSA-9675108	Nervous system development	29	584	0.0500557	0.000987606	0.00620595	Q05193;O15020;Q12860;Q13813;O75122;Q9UQ16;P32004;Q99962;P13591;P17252;Q00610;P22694;Q14194;P09497;Q16555;P47736;P78357;O94856;Q12955;Q13509;Q01484;Q01082;Q9BPU6;O95782;P17612;P68366;O14531;P04350;Q92823	R-HSA-443783;R-HSA-525833;R-HSA-443780;R-HSA-443778;R-HSA-443779;R-HSA-374669;R-HSA-445071;R-HSA-445069;R-HSA-445067;R-HSA-443784;R-HSA-374677;R-HSA-445079;R-HSA-445076;R-HSA-445077;R-HSA-374673;R-HSA-374672;R-HSA-374675;R-HSA-445084;R-HSA-374686;R-HSA-374681;R-HSA-374680;R-HSA-374683;R-HSA-445091;R-HSA-445089;R-HSA-392749;R-HSA-392748;R-HSA-392751;R-HSA-374696;R-HSA-443817;R-HSA-447030;R-HSA-422…
R-HSA-199977	ER to Golgi Anterograde Transport	12	155	0.0132853	0.00103432	0.00620595	O15020;Q13813;Q96FJ2;Q12955;P68366;Q13509;Q9H115;P04350;Q01484;O14576;Q01082;P46459	R-HSA-6809015;R-HSA-6809014;R-HSA-5694423;R-HSA-6807877;R-HSA-6809011;R-HSA-6807875;R-HSA-6809010;R-HSA-6809006;R-HSA-6809003;R-HSA-5694425
R-HSA-991365	Activation of GABAB receptors	6	43	0.00368561	0.00111766	0.00670598	P16520;P63211;P63096;O14775;P59768;P62873	R-HSA-170674;R-HSA-1013020;R-HSA-170666;R-HSA-1013013;R-HSA-1013012;R-HSA-392206;R-HSA-170686;R-HSA-170671
R-HSA-977444	GABA B receptor activation	6	43	0.00368561	0.00111766	0.00670598	P16520;P63211;P63096;O14775;P59768;P62873	R-HSA-170674;R-HSA-1013020;R-HSA-170666;R-HSA-1013013;R-HSA-1013012;R-HSA-392206;R-HSA-170686;R-HSA-170671
R-HSA-5362517	Signaling by Retinoic Acid	6	43	0.00368561	0.00111766	0.00670598	P08559;P29762;Q8TC12;P10515;P11177;P09622	R-HSA-5362721;R-HSA-5622134;R-HSA-203946;R-HSA-5362525;R-HSA-5419165
R-HSA-997272	Inhibition of voltage gated Ca2+ channels via Gbeta/gamma subunits	5	29	0.00248564	0.00115476	0.00692856	P63211;P16520;O14775;P59768;P62873	R-HSA-1013020;R-HSA-1013013;R-HSA-1013012
R-HSA-1296041	Activation of G protein gated Potassium channels	5	29	0.00248564	0.00115476	0.00692856	P63211;P16520;O14775;P59768;P62873	R-HSA-1013020;R-HSA-1013013;R-HSA-1013012
R-HSA-1296059	G protein gated Potassium channels	5	29	0.00248564	0.00115476	0.00692856	P63211;P16520;O14775;P59768;P62873	R-HSA-1013020;R-HSA-1013013;R-HSA-1013012
R-HSA-6794361	Neurexins and neuroligins	7	60	0.00514271	0.00123397	0.00740385	Q9H4G0;Q15700;O14936;P21579;Q9Y4C0;Q8NFZ4;Q9Y2J2	R-HSA-6794338;R-HSA-6797568;R-HSA-6794336;R-HSA-6794349;R-HSA-6794348;R-HSA-6794346;R-HSA-6794345;R-HSA-6794344;R-HSA-6797974;R-HSA-6794357;R-HSA-6794356;R-HSA-6794354;R-HSA-6797554;R-HSA-6797553;R-HSA-6794353;R-HSA-6794352
R-HSA-4086398	Ca2+ pathway	7	60	0.00514271	0.00123397	0.00740385	P16520;P63211;P17252;P09471;O14775;P59768;P62873	R-HSA-4332390;R-HSA-398193;R-HSA-3965444;R-HSA-3965447;R-HSA-3965441;R-HSA-398040
R-HSA-451326	Activation of kainate receptors upon glutamate binding	5	30	0.00257136	0.00133919	0.00803515	P63211;P16520;O14775;P59768;P62873	R-HSA-500717
R-HSA-9715370	Miro GTPase Cycle	3	8	0.000685695	0.00134242	0.00805454	O95140;P52306;Q8IXI2	R-HSA-9018825;R-HSA-9018824;R-HSA-9018815;R-HSA-9018814;R-HSA-9018817
R-HSA-888568	GABA synthesis	2	2	0.000171424	0.00135026	0.00810154	Q05329;Q99259	R-HSA-888572;R-HSA-888577
R-HSA-2187338	Visual phototransduction	9	100	0.00857118	0.00158711	0.00952266	P43080;P29973;P63211;Q8TC12;P17252;P03999;P11488;O14775;P62873	R-HSA-2466085;R-HSA-2534087;R-HSA-74882;R-HSA-975629;R-HSA-2530501;R-HSA-74885;R-HSA-9656891;R-HSA-74059;R-HSA-3229181;R-HSA-74031;R-HSA-74065;R-HSA-2584246;R-HSA-2514867;R-HSA-2534096;R-HSA-74615;R-HSA-2514865;R-HSA-2465917;R-HSA-2485180;R-HSA-74872;R-HSA-2485182;R-HSA-2586748;R-HSA-2534040
R-HSA-397795	G-protein beta:gamma signalling	5	32	0.00274278	0.00177204	0.0106322	P63211;P16520;O14775;P59768;P62873	R-HSA-392295;R-HSA-8964271;R-HSA-392300;R-HSA-8964614;R-HSA-8964634;R-HSA-8964604;R-HSA-8964605;R-HSA-8964317;R-HSA-398193;R-HSA-8964241;R-HSA-398040;R-HSA-8964599
R-HSA-9010642	ROBO receptors bind AKAP5	3	9	0.000771407	0.00187455	0.0107353	P17612;P17252;P22694	R-HSA-9010681;R-HSA-9010641;R-HSA-9010643;R-HSA-9010646
R-HSA-112043	PLC beta mediated events	6	49	0.00419988	0.00214707	0.0107353	Q13555;P17612;Q13554;P29992;P17252;P22694	R-HSA-9618834;R-HSA-442725;R-HSA-111970;R-HSA-112037;R-HSA-111879;R-HSA-8951727;R-HSA-111919;R-HSA-111925;R-HSA-111924;R-HSA-9617583;R-HSA-444792;R-HSA-111870;R-HSA-111966
R-HSA-190828	Gap junction trafficking	6	49	0.00419988	0.00214707	0.0107353	Q05193;P68366;Q00610;Q13509;P04350;P09497	R-HSA-196017;R-HSA-190519;R-HSA-196026;R-HSA-190520;R-HSA-191737;R-HSA-190829;R-HSA-190877
R-HSA-8856825	Cargo recognition for clathrin-mediated endocytosis	9	105	0.00899974	0.00219854	0.0109927	Q99962;P21579;O60641;Q00610;Q9BQI5;Q2M2I8;P09497;P63027;O95782	R-HSA-8866279;R-HSA-8863463;R-HSA-8866277;R-HSA-9681616;R-HSA-8867613;R-HSA-8866283
R-HSA-418594	G alpha (i) signalling events	18	317	0.0271707	0.00227912	0.0113956	Q13555;Q13554;P29992;O15354;P19086;P03999;P11488;P59768;P63211;P17612;P16520;P63096;P17252;O15303;P22694;O14775;P62873;P49758	R-HSA-9618834;R-HSA-392129;R-HSA-749454;R-HSA-177284;R-HSA-111879;R-HSA-167429;R-HSA-8982019;R-HSA-167433;R-HSA-392206;R-HSA-8982020;R-HSA-112271;R-HSA-392212;R-HSA-751001;R-HSA-420883;R-HSA-8964242;R-HSA-749456;R-HSA-111966;R-HSA-8964311;R-HSA-8964329;R-HSA-442725;R-HSA-111970;R-HSA-8982637;R-HSA-112037;R-HSA-8951727;R-HSA-170666;R-HSA-180073;R-HSA-380073;R-HSA-170671;R-HSA-111919;R-HSA-170674;R…
R-HSA-163359	Glucagon signaling in metabolic regulation	5	34	0.0029142	0.00229948	0.0114974	P17612;P16520;P22694;P59768;P62873	R-HSA-825631;R-HSA-111925
R-HSA-420092	Glucagon-type ligand receptors	5	34	0.0029142	0.00229948	0.0114974	P63211;P16520;O14775;P59768;P62873	R-HSA-381612
R-HSA-438066	Unblocking of NMDA receptors, glutamate binding and activation	4	21	0.00179995	0.00253002	0.0126501	Q13555;Q15700;Q13554;P07196	R-HSA-432164;R-HSA-438037;R-HSA-432162;R-HSA-432172;R-HSA-9614185
R-HSA-442982	Ras activation upon Ca2+ influx through NMDA receptor	4	21	0.00179995	0.00253002	0.0126501	Q13555;Q15700;Q13554;P07196	R-HSA-442732;R-HSA-442760
R-HSA-111933	Calmodulin induced events	5	35	0.00299991	0.0026022	0.013011	Q13555;P17612;Q13554;P17252;P22694	R-HSA-9618834;R-HSA-442725;R-HSA-111970;R-HSA-111925;R-HSA-111924;R-HSA-8951727;R-HSA-9617583;R-HSA-444792;R-HSA-111919;R-HSA-111966
R-HSA-1296065	Inwardly rectifying K+ channels	5	35	0.00299991	0.0026022	0.013011	P63211;P16520;O14775;P59768;P62873	R-HSA-1013020;R-HSA-1013013;R-HSA-1013012
R-HSA-111997	CaM pathway	5	35	0.00299991	0.0026022	0.013011	Q13555;P17612;Q13554;P17252;P22694	R-HSA-9618834;R-HSA-442725;R-HSA-111970;R-HSA-111925;R-HSA-111924;R-HSA-8951727;R-HSA-9617583;R-HSA-444792;R-HSA-111919;R-HSA-111966
R-HSA-74752	Signaling by Insulin receptor	8	89	0.00762835	0.00286601	0.01433	Q93050;Q16864;P21283;P21281;P36543;P38606;P61421;Q9UI12	R-HSA-74723;R-HSA-5252133
R-HSA-157858	Gap junction trafficking and regulation	6	52	0.00445702	0.00287302	0.0143651	Q05193;P68366;Q00610;Q13509;P04350;P09497	R-HSA-196017;R-HSA-190519;R-HSA-196026;R-HSA-190520;R-HSA-191737;R-HSA-190829;R-HSA-190877
R-HSA-5205685	PINK1-PRKN Mediated Mitophagy	4	22	0.00188566	0.00298552	0.0149276	Q9NS69;O94826;O95140;P21796	R-HSA-5205663;R-HSA-5205661;R-HSA-5205673;R-HSA-5205682;R-HSA-5205649
R-HSA-168799	Neurotoxicity of clostridium toxins	4	22	0.00188566	0.00298552	0.0149276	P21579;P61266;P60880;P63027	R-HSA-194818;R-HSA-5244402;R-HSA-5250962;R-HSA-5244404;R-HSA-194793;R-HSA-5250972;R-HSA-5228578;R-HSA-194796;R-HSA-194800;R-HSA-5250979;R-HSA-5250986;R-HSA-5250892;R-HSA-5244397;R-HSA-181567;R-HSA-5250606
R-HSA-6811436	COPI-independent Golgi-to-ER retrograde traffic	6	53	0.00454273	0.00315162	0.0157581	Q96FJ2;P68366;Q13509;P04350;P43034;O14576	R-HSA-8849350;R-HSA-8848484;R-HSA-8849353
R-HSA-6794362	Protein-protein interactions at synapses	8	91	0.00779978	0.00327379	0.0159916	Q9H4G0;Q15700;O14936;P21579;Q9Y4C0;Q8NFZ4;Q9Y2J2;O95197	R-HSA-6794338;R-HSA-6797568;R-HSA-6794336;R-HSA-6794349;R-HSA-6794348;R-HSA-6794346;R-HSA-6794345;R-HSA-6794344;R-HSA-6797974;R-HSA-6794357;R-HSA-6794356;R-HSA-6794354;R-HSA-6797554;R-HSA-6797553;R-HSA-6794353;R-HSA-6794352;R-HSA-8849882
R-HSA-196025	Formation of annular gap junctions	3	11	0.00094283	0.00329214	0.0159916	Q05193;Q00610;P09497	R-HSA-196017;R-HSA-196026
R-HSA-111996	Ca-dependent events	5	37	0.00317134	0.00329274	0.0159916	Q13555;P17612;Q13554;P17252;P22694	R-HSA-9618834;R-HSA-442725;R-HSA-111970;R-HSA-111925;R-HSA-111924;R-HSA-8951727;R-HSA-9617583;R-HSA-444792;R-HSA-111919;R-HSA-111966
R-HSA-199992	trans-Golgi Network Vesicle Budding	7	74	0.00634268	0.00392915	0.0159916	O75061;Q99962;Q5SYC1;Q00610;P09497;P63027	R-HSA-421831;R-HSA-432706;R-HSA-376369;R-HSA-432707;R-HSA-432688;R-HSA-421836;R-HSA-5333658;R-HSA-434362;R-HSA-421835;R-HSA-432712;R-HSA-421833
R-HSA-8856688	Golgi-to-ER retrograde transport	10	137	0.0117425	0.00399791	0.0159916	O00139;Q96FJ2;P68366;Q9H115;Q13509;Q7Z4S6;P04350;P43034;O14576;P46459	R-HSA-8849350;R-HSA-8848484;R-HSA-6811426;R-HSA-6811425;R-HSA-6811423;R-HSA-6811422;R-HSA-8849353
R-HSA-1632852	Macroautophagy	10	137	0.0117425	0.00399791	0.0159916	Q9NS69;Q96FJ2;P68366;Q13509;O95140;O94826;P04350;P60520;O14576;P21796	R-HSA-1632857;R-HSA-5682388;R-HSA-9646679;R-HSA-9646390;R-HSA-5205673;R-HSA-5678490;R-HSA-5682011;R-HSA-9646685;R-HSA-5205663;R-HSA-5205661;R-HSA-1632843;R-HSA-5681987;R-HSA-9646383;R-HSA-5205682;R-HSA-5678315;R-HSA-5205649;R-HSA-9646348;R-HSA-5682377;R-HSA-5678313
R-HSA-9662361	Sensory processing of sound by outer hair cells of the cochlea	6	56	0.00479986	0.0041088	0.0164352	Q9H4G0;O14936;Q13813;Q01082;Q9Y2J2;Q01814	R-HSA-9663363;R-HSA-9662114
R-HSA-190873	Gap junction degradation	3	12	0.00102854	0.00419205	0.0167682	Q05193;Q00610;P09497	R-HSA-196017;R-HSA-190519;R-HSA-196026;R-HSA-190829
R-HSA-418359	Reduction of cytosolic Ca++ levels	3	12	0.00102854	0.00419205	0.0167682	P20020;Q16720;Q01814	R-HSA-418309
R-HSA-9648025	EML4 and NUDC in mitotic spindle formation	9	117	0.0100283	0.00443981	0.0177592	O00139;Q96FJ2;Q16537;P68366;Q13509;P04350;P43034;O75122;O14576	R-HSA-9648114;R-HSA-9648017
R-HSA-6799198	Complex I biogenesis	6	57	0.00488557	0.00447111	0.0178844	P19404;P28331;Q16795;P49821;O43678;O75251	R-HSA-6799191;R-HSA-6800870;R-HSA-6800868;R-HSA-6799203;R-HSA-6799202;R-HSA-6799197;R-HSA-6799196;R-HSA-6788556;R-HSA-6799179;R-HSA-6788523;R-HSA-6799178
R-HSA-3371497	HSP90 chaperone cycle for steroid hormone receptors (SHR) in the presence of ligand	6	57	0.00488557	0.00447111	0.0178844	Q96FJ2;P68366;Q13509;P04350;O14576;Q02790	R-HSA-9726580;R-HSA-9706837;R-HSA-5618099;R-HSA-9726621;R-HSA-9725885;R-HSA-9725855;R-HSA-5618110;R-HSA-5618073;R-HSA-5618085;R-HSA-9705925;R-HSA-9705926;R-HSA-5618080;R-HSA-9690534;R-HSA-5618093;R-HSA-9726509;R-HSA-9678925
R-HSA-948021	Transport to the Golgi and subsequent modification	12	186	0.0159424	0.00451208	0.0180483	O15020;Q13813;Q96FJ2;Q12955;P68366;Q13509;Q9H115;P04350;Q01484;O14576;Q01082;P46459	R-HSA-6809015;R-HSA-6809014;R-HSA-5694423;R-HSA-6807877;R-HSA-6809011;R-HSA-6807875;R-HSA-6809010;R-HSA-6809006;R-HSA-6809003;R-HSA-5694425
R-HSA-9620244	Long-term potentiation	4	25	0.0021428	0.00468151	0.018726	Q13555;Q15700;Q13554;P07196	R-HSA-445367;R-HSA-442725;R-HSA-9612085;R-HSA-9618750;R-HSA-9617583
R-HSA-5250989	Toxicity of botulinum toxin type G (botG)	2	4	0.000342847	0.00521599	0.020864	P21579;P63027	R-HSA-5250962;R-HSA-5250979;R-HSA-5250986;R-HSA-5250972
R-HSA-9022927	MECP2 regulates transcription of genes involved in GABA signaling	2	4	0.000342847	0.00521599	0.020864	Q05329;Q99259	R-HSA-9022942;R-HSA-9022934
R-HSA-180897	Vpr-mediated induction of apoptosis by mitochondrial outer membrane permeabilization	2	4	0.000342847	0.00521599	0.020864	P05141;P12235	R-HSA-180905
R-HSA-5250971	Toxicity of botulinum toxin type C (botC)	2	4	0.000342847	0.00521599	0.020864	P61266;P60880	R-HSA-194793;R-HSA-181567
R-HSA-5140745	WNT5A-dependent internalization of FZD2, FZD5 and ROR2	3	13	0.00111425	0.00522766	0.0209106	Q00610;P09497;O95782	R-HSA-5140747
R-HSA-3858494	Beta-catenin independent WNT signaling	10	144	0.0123425	0.00561275	0.022451	P16520;P63211;P17252;P09471;Q00610;O14775;P09497;P59768;P62873;O95782	R-HSA-4332390;R-HSA-5140747;R-HSA-5138459;R-HSA-398193;R-HSA-3965444;R-HSA-3965447;R-HSA-3965441;R-HSA-5138432;R-HSA-398040;R-HSA-5138433
R-HSA-114508	Effects of PIP2 hydrolysis	4	27	0.00231422	0.00611392	0.0244557	Q8N2K0;Q9BV23;P52429;Q02156	R-HSA-425861;R-HSA-426240;R-HSA-5694462
R-HSA-9646399	Aggrephagy	5	44	0.00377132	0.00675197	0.0270079	Q96FJ2;P68366;Q13509;P04350;O14576	R-HSA-9646679;R-HSA-9646390;R-HSA-9646383;R-HSA-9646685;R-HSA-9646348
R-HSA-2500257	Resolution of Sister Chromatid Cohesion	9	126	0.0107997	0.00706312	0.0282525	O00139;Q96FJ2;Q16537;P68366;Q13509;P04350;P43034;O75122;O14576	R-HSA-2484822;R-HSA-1638803;R-HSA-2468287;R-HSA-1638821
R-HSA-8964539	Glutamate and glutamine metabolism	3	15	0.00128568	0.00772632	0.0309053	P00505;O94925;P15104	R-HSA-70609;R-HSA-70613;R-HSA-70606
R-HSA-5205647	Mitophagy	4	29	0.00248564	0.0078114	0.0312456	Q9NS69;O94826;O95140;P21796	R-HSA-5205663;R-HSA-5205661;R-HSA-5205673;R-HSA-5205682;R-HSA-5205649
R-HSA-442742	CREB1 phosphorylation through NMDA receptor-mediated activation of RAS signaling	4	29	0.00248564	0.0078114	0.0312456	Q13555;Q15700;Q13554;P07196	R-HSA-442732;R-HSA-442760
R-HSA-9013425	RHOT1 GTPase cycle	2	5	0.000428559	0.00800962	0.0320385	P52306;Q8IXI2	R-HSA-9018815;R-HSA-9018814;R-HSA-9018817
R-HSA-163358	PKA-mediated phosphorylation of key metabolic factors	2	5	0.000428559	0.00800962	0.0320385	P17612;P22694	R-HSA-163672;R-HSA-163676;R-HSA-163773
R-HSA-426048	Arachidonate production from DAG	2	5	0.000428559	0.00800962	0.0320385	Q8N2K0;Q9BV23	R-HSA-5694462
R-HSA-9612973	Autophagy	10	152	0.0130282	0.00803889	0.0321556	Q9NS69;Q96FJ2;P68366;Q13509;O95140;O94826;P04350;P60520;O14576;P21796	R-HSA-1632857;R-HSA-5682388;R-HSA-9646679;R-HSA-9646390;R-HSA-5205673;R-HSA-5678490;R-HSA-5682011;R-HSA-9646685;R-HSA-5205663;R-HSA-5205661;R-HSA-1632843;R-HSA-5681987;R-HSA-9646383;R-HSA-5205682;R-HSA-5678315;R-HSA-5205649;R-HSA-9646348;R-HSA-5682377;R-HSA-5678313
R-HSA-5576891	Cardiac conduction	9	130	0.0111425	0.00855276	0.034211	Q13555;P17612;Q13554;P13637;P20020;Q16720;P50993;Q01814;P05026	R-HSA-427910;R-HSA-418309;R-HSA-9684068;R-HSA-5576895;R-HSA-5617182;R-HSA-5617179;R-HSA-936897
R-HSA-397014	Muscle contraction	12	204	0.0174852	0.00904344	0.0361737	Q13555;P17612;Q13554;Q9NZR1;P13637;Q02153;P20020;Q16720;P08133;P50993;Q01814;P05026	R-HSA-427910;R-HSA-390597;R-HSA-418309;R-HSA-390598;R-HSA-390593;R-HSA-390595;R-HSA-9621179;R-HSA-5576895;R-HSA-392143;R-HSA-5617182;R-HSA-5617179;R-HSA-936897;R-HSA-9684068;R-HSA-9620456;R-HSA-5263628;R-HSA-392152
R-HSA-392517	Rap1 signalling	3	16	0.00137139	0.00919786	0.0367914	P17612;P22694;P47736	R-HSA-913996;R-HSA-392513
R-HSA-5628897	TP53 Regulates Metabolic Genes	7	88	0.00754264	0.00971153	0.0388461	P10606;P61981;P42704;O94925;P00403;P30044;P20674	R-HSA-70609;R-HSA-5632738;R-HSA-5632732;R-HSA-163214;R-HSA-3341343
R-HSA-416993	Trafficking of GluR2-containing AMPA receptors	3	17	0.0014571	0.0108221	0.0394092	P17252;O95782;P46459	R-HSA-421007;R-HSA-416639;R-HSA-416985
R-HSA-76002	Platelet activation, signaling and aggregation	14	265	0.0227136	0.0121062	0.0394092	Q8N2K0;P29992;P62937;Q9BV23;P52429;Q02156;P59768;P63211;P16520;P63096;P17252;P68366;O14775;P62873	R-HSA-396996;R-HSA-425861;R-HSA-397891;R-HSA-392195;R-HSA-426240;R-HSA-428750;R-HSA-428749;R-HSA-428941;R-HSA-396941;R-HSA-397835;R-HSA-392202;R-HSA-482775;R-HSA-418581;R-HSA-482772;R-HSA-418579;R-HSA-428752;R-HSA-418576;R-HSA-5694462;R-HSA-428909;R-HSA-428918;R-HSA-428917;R-HSA-114553;R-HSA-114552;R-HSA-114683;R-HSA-114684;R-HSA-392187;R-HSA-114558
R-HSA-1445148	Translocation of SLC2A4 (GLUT4) to the plasma membrane	6	72	0.00617125	0.0131364	0.0394092	P61981;P68366;Q13509;P04350;P63027;Q9Y4I1	R-HSA-1449574;R-HSA-2316352;R-HSA-1454689;R-HSA-2316347;R-HSA-1445149;R-HSA-1449597
R-HSA-5663220	RHO GTPases Activate Formins	9	141	0.0120854	0.0138827	0.041648	O00139;Q96FJ2;Q16537;P68366;Q13509;P04350;P43034;O75122;O14576	R-HSA-5666160;R-HSA-5666129;R-HSA-5666169
R-HSA-3371556	Cellular response to heat stress	7	95	0.00814262	0.0142367	0.0427101	Q13555;Q13554;O43301;O95757;Q96MM6;Q02790;P38646	R-HSA-5251955;R-HSA-5251942;R-HSA-5251959;R-HSA-5324617;R-HSA-5252041;R-HSA-5082387;R-HSA-5252079
R-HSA-9013419	RHOT2 GTPase cycle	2	7	0.000599983	0.0151645	0.0454935	O95140;P52306	R-HSA-9018825;R-HSA-9018824
R-HSA-190840	Microtubule-dependent trafficking of connexons from Golgi to the plasma membrane	3	20	0.00171424	0.0166358	0.0499074	P68366;Q13509;P04350	R-HSA-190520
