# Supplementary material for: Large-Scale Protein Analysis of Experimental Retinal Artery Occlusion
Source: Int J Mol Sci. 2023 Apr 27;24(9):7919. doi: 10.3390/ijms24097919 (PMC10177937; doi:10.3390/ijms24097919)
Supplement: Supplementary file 1 [file ijms-24-07919-s001.zip › Table S9, Proteins not found in Reactome.xlsx]

## Sheet: Ark1
Proteins not found in reactome, downregulated	Proteins not found in reactome, upregulated
A8MT19	Q8N4S7
Q13432	Q96TA1
Q14444	O95758
P35219	Q15417
Q96JE9	Q9BZV3
Q9UBB6	Q7Z3U7
P57721	P13667
Q4G0F5	P55209
O75781	O60506
Q96GK7	Q9H223
Q8NE35	Q96P70
Q9H9B4	P13693
Q9Y4G6	Q5TZA2
Q9GZN7	Q9BVG4
Q8IYB5	Q9H3U1
Q6MZT1	P40121
P26378	Q9Y3A5
Q9UNW9	Q6DD88
Q14257	Q9Y6E2
Q14576	P21980
Q13367	P28838
Q9P260	Q96CX2
Q16799	Q99805
P11137	P48147
Q96HU8	Q13045
P36575	P46821
P51513	Q9UKY7
P62760	P20073
Q9UDX5	O95747
Q9BUJ2	O00299
Q99719	Q09666
Q14141	Q96NY7
Q13491	P13797
Q8N573	Q9Y5L0
Q5TBA9	Q00688
Q15555	Q6P1M3
Q9UI15	Q9H4A4
Q5SSJ5	Q53GG5
Q12765	Q6IQ23
Q7Z7G2
Q9ULD0
Q12926
O95057
P12036
Q9Y4E6
Q00577
Q8TDJ6
A6NHQ2
Q96FC7
O15537
Q9BWM7
Q9UH03
P22676
Q8NCB2
O15394
Q9ULU8
Q9Y2J0
P0DP25
Q7L099
Q8WXD9
P78559
P84074
Q96GD0
Q00325
Q6DN90
Q8WVH0
Q14168
P48539
